# Supplementary material for: Luminal epithelial cells integrate variable responses to aging into stereotypical changes that underlie breast cancer susceptibility
Source: eLife. 2024 Nov 15;13:e95720. doi: 10.7554/eLife.95720 (PMC11723586; doi:10.7554/eLife.95720)
Supplement: Figure 1—source data 1. — (A) Metadata for RNA-sequencing samples used in this study. Data includes RNA-seq ID, subject ID, sample ID, sample type, culture condition, cell type, age, age group, tissue type, FACS markers, RNA-seq batch, and project ID. [file elife-95720-fig1-data1.xlsx]

## Sheet: Table 1
RNASeqID	SubjectID	SampleID	SampleType	CultureCondition	CellType	Age	AgeGroup	TissueType	FACSMarkers	RNASeqBatch	ProjectID
14919_160_LEP_RNA_ATTCCT_L999.bam.count	160	160	160 LEP	p4	Luminal epithelial cells	16	Young	Reduction Mammaplasty	CD227,CD271	Miyano1	170112
14918_160_MEP_RNA_ACTGAT_L999.bam.count	160	160	160 MEP	p4	Myoepithelial cells	16	Young	Reduction Mammaplasty	CD227,CD271	Miyano1	170112
27011_48R_LEP_S30_L999.bam.count	48R	48R	48R LEP	p4	Luminal epithelial cells	16	Young	Reduction Mammaplasty	CD227,CD271	Miyano2	181212
27001_48R_MEP_S11_L999.bam.count	48R	48R	48R MEP	p4	Myoepithelial cells	16	Young	Reduction Mammaplasty	CD227,CD271	Miyano2	181212
27013_168R_LEP_S33_L999.bam.count	168R	168R	168R LEP	p4	Luminal epithelial cells	19	Young	Reduction Mammaplasty	CD227,CD271	Miyano2	181212
27003_168R_MEP_S24_L999.bam.count	168R	168R	168R MEP	p4	Myoepithelial cells	19	Young	Reduction Mammaplasty	CD227,CD271	Miyano2	181212
14899_240L_LEP_RNA_ACTGAT_L999.bam.count	240L	240L	240L LEP	p4	Luminal epithelial cells	19	Young	Reduction Mammaplasty	CD227,CD271	Miyano1	170112
25430_RNA_240L_LEP_S4_L999.bam.counts	240L	240L	240L LEP	p4	Luminal epithelial cells	19	Young	Reduction Mammaplasty	CD227,CD271	Shalabi2	180928
27010_240L_LEP_S29_L999.bam.count	240L	240L	240L LEP	p4	Luminal epithelial cells	19	Young	Reduction Mammaplasty	CD227,CD271	Miyano2	181212
33663_240LB_LEP_S2_L999.bam.count	240L	240LB	240LB LEP	p4	Luminal epithelial cells	19	Young	Reduction Mammaplasty	CD133,CD271	Todhunter1	200211
14898_240L_MEP_RNA_GAGTGG_L999.bam.count	240L	240L	240L MEP	p4	Myoepithelial cells	19	Young	Reduction Mammaplasty	CD227,CD271	Miyano1	170112
25429_RNA_240L_MEP_S3_L999.bam.counts	240L	240L	240L MEP	p4	Myoepithelial cells	19	Young	Reduction Mammaplasty	CD227,CD271	Shalabi2	180928
27000_240L_MEP_S10_L999.bam.count	240L	240L	240L MEP	p4	Myoepithelial cells	19	Young	Reduction Mammaplasty	CD227,CD271	Miyano2	181212
33662_240LB_MEP_S1_L999.bam.count	240L	240LB	240LB MEP	p4	Myoepithelial cells	19	Young	Reduction Mammaplasty	CD133,CD271	Todhunter1	200211
25481_184D_LEP_S35_L999.bam.counts	184D	184D	184D LEP	p4	Luminal epithelial cells	21	Young	Reduction Mammaplasty	CD227,CD271	Shalabi2	180928
27014_184D_LEP_S34_L999.bam.count	184D	184D	184D LEP	p4	Luminal epithelial cells	21	Young	Reduction Mammaplasty	CD227,CD271	Miyano2	181212
25480_184D_MEP_S34_L999.bam.counts	184D	184D	184D MEP	p4	Myoepithelial cells	21	Young	Reduction Mammaplasty	CD227,CD271	Shalabi2	180928
27004_184D_MEP_S25_L999.bam.count	184D	184D	184D MEP	p4	Myoepithelial cells	21	Young	Reduction Mammaplasty	CD227,CD271	Miyano2	181212
27012_356E_LEP_S32_L999.bam.count	356E	356E	356E LEP	p4	Luminal epithelial cells	21	Young	Reduction Mammaplasty	CD227,CD271	Miyano2	181212
27002_356E_MEP_S19_L999.bam.count	356E	356E	356E MEP	p4	Myoepithelial cells	21	Young	Reduction Mammaplasty	CD227,CD271	Miyano2	181212
14907_59L_LEP_RNA_CTTGTA_L999.bam.count	59L	59L	59L LEP	p4	Luminal epithelial cells	23	Young	Reduction Mammaplasty	CD227,CD271	Miyano1	170112
14906_59L_MEP_RNA_GGCTAC_L999.bam.count	59L	59L	59L MEP	p4	Myoepithelial cells	23	Young	Reduction Mammaplasty	CD227,CD271	Miyano1	170112
33667_163_LEP_S6_L999.bam.count	163	163	163 LEP	p4	Luminal epithelial cells	27	Young	Reduction Mammaplasty	CD133,CD271	Todhunter1	200211
33666_163_MEP_S5_L999.bam.count	163	163	163 MEP	p4	Myoepithelial cells	27	Young	Reduction Mammaplasty	CD133,CD271	Todhunter1	200211
14893_51L_LEP_RNA_GTCCGC_L999.bam.count	51L	51L	51L LEP	p4	Luminal epithelial cells	27	Young	Reduction Mammaplasty	CD227,CD271	Miyano1	170112
14892_51L_MEP_RNA_CCGTCC_L999.bam.count	51L	51L	51L MEP	p4	Myoepithelial cells	27	Young	Reduction Mammaplasty	CD227,CD271	Miyano1	170112
14909_172L_LEP_RNA_AGTTCC_L999.bam.count	172L	172L	172L LEP	p4	Luminal epithelial cells	28	Young	Reduction Mammaplasty	CD227,CD271	Miyano1	170112
14908_172L_MEP_RNA_AGTCAA_L999.bam.count	172L	172L	172L MEP	p4	Myoepithelial cells	28	Young	Reduction Mammaplasty	CD227,CD271	Miyano1	170112
14897_124_LEP_RNA_CGTACG_L999.bam.count	124	124	124 LEP	p4	Luminal epithelial cells	29	Young	Reduction Mammaplasty	CD227,CD271	Miyano1	170112
25426_RNA_124_LEP_S36_L999.bam.counts	124	124	124 LEP	p4	Luminal epithelial cells	29	Young	Reduction Mammaplasty	CD227,CD271	Shalabi1	180921
14896_124_MEP_RNA_GTTTCG_L999.bam.count	124	124	124 MEP	p4	Myoepithelial cells	29	Young	Reduction Mammaplasty	CD227,CD271	Miyano1	170112
25425_RNA_124_MEP_S35_L999.bam.counts	124	124	124 MEP	p4	Myoepithelial cells	29	Young	Reduction Mammaplasty	CD227,CD271	Shalabi1	180921
25420_RNA_117R_LEP_S30.bam.count	117R	117R	117R LEP	p4	Luminal epithelial cells	56	Old	Reduction Mammaplasty	CD227,CD271	Shalabi1	180921
27016_117R_LEP_S36_L999.bam.count	117R	117R	117R LEP	p4	Luminal epithelial cells	56	Old	Reduction Mammaplasty	CD227,CD271	Miyano2	181212
25419_RNA_117R_MEP_S29.bam.count	117R	117R	117R MEP	p4	Myoepithelial cells	56	Old	Reduction Mammaplasty	CD227,CD271	Shalabi1	180921
27006_117R_MEP_S27_L999.bam.count	117R	117R	117R MEP	p4	Myoepithelial cells	56	Old	Reduction Mammaplasty	CD227,CD271	Miyano2	181212
14911_191L_LEP_RNA_CCGTCC_L999.bam.count	191L	191L	191L LEP	p4	Luminal epithelial cells	56	Old	Reduction Mammaplasty	CD227,CD271	Miyano1	170112
14910_191L_MEP_RNA_ATGTCA_L999.bam.count	191L	191L	191L MEP	p4	Myoepithelial cells	56	Old	Reduction Mammaplasty	CD227,CD271	Miyano1	170112
27017_153L_LEP_S37_L999.bam.count	153L	153L	153L LEP	p4	Luminal epithelial cells	60	Old	Reduction Mammaplasty	CD227,CD271	Miyano2	181212
27007_153L_MEP_S20_L999.bam.count	153L	153L	153L MEP	p4	Myoepithelial cells	60	Old	Reduction Mammaplasty	CD227,CD271	Miyano2	181212
14895_112R_LEP_RNA_GTGGCC_L999.bam.count	112R	112R	112R LEP	p4	Luminal epithelial cells	61	Old	Reduction Mammaplasty	CD227,CD271	Miyano1	170112
27015_112R_LEP_S35_L999.bam.count	112R	112R	112R LEP	p4	Luminal epithelial cells	61	Old	Reduction Mammaplasty	CD227,CD271	Miyano2	181212
33665_112R_LEP_S4_L999.bam.count	112R	112R	112R LEP	p4	Luminal epithelial cells	61	Old	Reduction Mammaplasty	CD133,CD271	Todhunter1	200211
14894_112R_MEP_RNA_GTGAAA_L999.bam.count	112R	112R	112R MEP	p4	Myoepithelial cells	61	Old	Reduction Mammaplasty	CD227,CD271	Miyano1	170112
27005_112R_MEP_S26_L999.bam.count	112R	112R	112R MEP	p4	Myoepithelial cells	61	Old	Reduction Mammaplasty	CD227,CD271	Miyano2	181212
33664_112R_MEP_S3_L999.bam.count	112R	112R	112R MEP	p4	Myoepithelial cells	61	Old	Reduction Mammaplasty	CD133,CD271	Todhunter1	200211
14901_237_LEP_RNA_CGATGT_L999.bam.count	237	237	237 LEP	p4	Luminal epithelial cells	66	Old	Reduction Mammaplasty	CD227,CD271	Miyano1	170112
14900_237_MEP_RNA_ATTCCT_L999.bam.count	237	237	237 MEP	p4	Myoepithelial cells	66	Old	Reduction Mammaplasty	CD227,CD271	Miyano1	170112
14905_122L_LEP_RNA_GATCAG_L999.bam.count	122L	122L	122L LEP	p4	Luminal epithelial cells	66	Old	Reduction Mammaplasty	CD227,CD271	Miyano1	170112
14904_122L_MEP_RNA_CAGATC_L999.bam.count	122L	122L	122L MEP	p4	Myoepithelial cells	66	Old	Reduction Mammaplasty	CD227,CD271	Miyano1	170112
27018_29_LEP_S38_L999.bam.count	29	29	29 LEP	p4	Luminal epithelial cells	68	Old	Reduction Mammaplasty	CD227,CD271	Miyano2	181212
27008_29_MEP_S21_L999.bam.count	29	29	29 MEP	p4	Myoepithelial cells	68	Old	Reduction Mammaplasty	CD227,CD271	Miyano2	181212
27019_429ER_LEP_S22_L999.bam.count	429ER	429ER	429ER LEP	p4	Luminal epithelial cells	72	Old	Reduction Mammaplasty	CD227,CD271	Miyano2	181212
27009_429ER_MEP_S28_L999.bam.count	429ER	429ER	429ER MEP	p4	Myoepithelial cells	72	Old	Reduction Mammaplasty	CD227,CD271	Miyano2	181212
33689_160_org_LEP_S32_L999.bam.count	160	160	160 LEP	organoid	Luminal epithelial cells	16	Young	Reduction Mammaplasty	CD133,CD271	Todhunter1	200211
33681_195L_org_LEP_S22_L999.bam.count	195L	195L	195L LEP	organoid	Luminal epithelial cells	24	Young	Reduction Mammaplasty	CD133,CD271	Todhunter1	200211
33680_195L_org_MEP_S21_L999.bam.count	195L	195L	195L MEP	organoid	Myoepithelial cells	24	Young	Reduction Mammaplasty	CD133,CD271	Todhunter1	200211
33683_51L_org_LEP_S24_L999.bam.count	51L	51L	51L LEP	organoid	Luminal epithelial cells	27	Young	Reduction Mammaplasty	CD133,CD271	Todhunter1	200211
33682_51L_org_MEP_S23_L999.bam.count	51L	51L	51L MEP	organoid	Myoepithelial cells	27	Young	Reduction Mammaplasty	CD133,CD271	Todhunter1	200211
33685_124_org_LEP_S26_L999.bam.count	124	124	124 LEP	organoid	Luminal epithelial cells	29	Young	Reduction Mammaplasty	CD133,CD271	Todhunter1	200211
33684_124_org_MEP_S25_L999.bam.count	124	124	124 MEP	organoid	Myoepithelial cells	29	Young	Reduction Mammaplasty	CD133,CD271	Todhunter1	200211
33687_112R_org_LEP_S30_L999.bam.count	112R	112R	112R LEP	organoid	Luminal epithelial cells	61	Old	Reduction Mammaplasty	CD133,CD271	Todhunter1	200211
33686_112R_org_MEP_S29_L999.bam.count	112R	112R	112R MEP	organoid	Myoepithelial cells	61	Old	Reduction Mammaplasty	CD133,CD271	Todhunter1	200211
33693_96L_org_LEP_S34_L999.bam.count	96L	96L	96L LEP	organoid	Luminal epithelial cells	62	Old	Reduction Mammaplasty	CD133,CD271	Todhunter1	200211
33691_237_org_LEP_S33_L999.bam.count	237	237	237 LEP	organoid	Luminal epithelial cells	66	Old	Reduction Mammaplasty	CD133,CD271	Todhunter1	200211
