# Supplementary material for: Luminal epithelial cells integrate variable responses to aging into stereotypical changes that underlie breast cancer susceptibility
Source: eLife. 2024 Nov 15;13:e95720. doi: 10.7554/eLife.95720 (PMC11723586; doi:10.7554/eLife.95720)
Supplement: Figure 1—source data 2. — (A–B) Table listing the number of DE genes between LEPs and MEPs in younger (A) and older women (B) women at different BH adj. p-value thresholds (<0.05, 0.01, 0.001) and fold change cut-offs (≥two-, four-, eight-fold change). [file elife-95720-fig1-data2.xlsx]

## Sheet: A N DE MEP vs LEP in Young
	Number of genes DE in MEP vs LEP in <=30y
	#DE	>= 2-fold	>= 4-fold	>= 8-fold
adj p-val <0.05	11265	4255	2025	1089
adj p-val <0.01	10096	4216	2025	1089
adj p-val <0.001	8860	4040	2024	1089

## Sheet: B N DE MEP vs LEP in Old
	Number of genes DE in MEP vs LEP >=55y
	#DE	>= 2-fold	>= 4-fold	>= 8-fold
adj p-val <0.05	9620	3857	1827	941
adj p-val <0.01	8028	3645	1824	941
adj p-val <0.001	6577	3345	1812	940
