# Supplementary material for: Luminal epithelial cells integrate variable responses to aging into stereotypical changes that underlie breast cancer susceptibility
Source: eLife. 2024 Nov 15;13:e95720. doi: 10.7554/eLife.95720 (PMC11723586; doi:10.7554/eLife.95720)
Supplement: Figure 1—source data 3. — (A–B) Lineage-specific MEP vs. LEP DE in (A) younger and (B) older women (adj. p<0.001; lfc ≥1 MEP-specific, lfc ≤-1 LEP-specific). [file elife-95720-fig1-data3.xlsx]

## Sheet: A DE MEP vs LEP in Young
EnsemblID	EnsDb.Hsapiens.v86.GeneSYM	EnsDb.Hsapiens.v86.EntrezID	EnsDb.Hsapiens.v86.UniprotID	EnsemblID.GeneSYM	logFC	AveExpr	t	P.Value	adj.P.Val	B
ENSG00000143479	DYRK3	8444	O43781	ENSG00000143479_DYRK3	2.66593	3.96393	41.2248	5.49717e-40	5.35315e-36	80.8006
ENSG00000151726	ACSL1	2180	B7Z3Z9	ENSG00000151726_ACSL1	-3.53749	7.39809	-41.0986	6.37136e-40	5.35315e-36	81.0447
ENSG00000163694	RBM47	54502	A0AV96	ENSG00000163694_RBM47	-4.3434	4.82492	-40.7797	9.26792e-40	5.35315e-36	80.2974
ENSG00000065361	ERBB3	2065	F8VRL0	ENSG00000065361_ERBB3	-4.55979	4.90012	-40.388	1.47417e-39	6.38609e-36	79.8824
ENSG00000125089	SH3TC1	54436	NA	ENSG00000125089_SH3TC1	3.72834	4.61999	38.1362	2.31316e-38	8.01648e-35	77.2374
ENSG00000100092	SH3BP1	23616	Q9Y3L3	ENSG00000100092_SH3BP1	1.96823	6.11436	37.4221	5.71742e-38	1.65119e-34	76.5558
ENSG00000173898	SPTBN2	6712	O15020	ENSG00000173898_SPTBN2	-1.85493	7.06681	-36.7695	1.32596e-37	3.28233e-34	75.7063
ENSG00000109062	SLC9A3R1	100500847	J3QRP6	ENSG00000109062_SLC9A3R1	-2.28797	6.59969	-35.7587	5.01716e-37	1.08672e-33	74.3819
ENSG00000065054	SLC9A3R2	9351	H3BMF5	ENSG00000065054_SLC9A3R2	-2.63197	5.18031	-34.5831	2.46612e-36	4.74811e-33	72.7849
ENSG00000153292	ADGRF1	266977	Q5T601	ENSG00000153292_ADGRF1	-3.67203	6.48551	-34.3851	3.24061e-36	5.61533e-33	72.5227
ENSG00000105928	DFNA5	1687	O60443	ENSG00000105928_DFNA5	3.33607	5.09861	34.0781	4.96292e-36	7.81796e-33	72.0696
ENSG00000188313	PLSCR1	5359	O15162	ENSG00000188313_PLSCR1	-2.13526	6.43183	-33.9621	5.83572e-36	8.42677e-33	71.9226
ENSG00000155755	TMEM237	65062	Q96Q45	ENSG00000155755_TMEM237	1.71658	5.5019	33.7521	7.8348e-36	1.04432e-32	71.6421
ENSG00000073350	LLGL2	3993	J3QSA6	ENSG00000073350_LLGL2	-2.4208	5.51358	-33.4791	1.15188e-35	1.4257e-32	71.2581
ENSG00000119411	BSPRY	54836	Q5W0U4	ENSG00000119411_BSPRY	-7.12914	2.44762	-33.0059	2.26263e-35	2.61379e-32	68.1921
ENSG00000071073	MGAT4A	11320	Q9UM21	ENSG00000071073_MGAT4A	-5.84375	2.77234	-32.7174	3.42963e-35	3.71429e-32	68.8262
ENSG00000171124	FUT3	2525	P21217	ENSG00000171124_FUT3	-7.35012	2.73401	-32.6687	3.68021e-35	3.75122e-32	67.8715
ENSG00000157350	ST3GAL2	6483	Q16842	ENSG00000157350_ST3GAL2	2.95815	3.11557	32.1626	7.70359e-35	7.41599e-32	69.0706
ENSG00000230937	MIR205HG	406988	NA	ENSG00000230937_MIR205HG	2.74665	6.85815	31.9027	1.13043e-34	1.01777e-31	68.9396
ENSG00000143375	CGN	57530	A2A3M4	ENSG00000143375_CGN	-6.05771	3.71375	-31.8768	1.17471e-34	1.01777e-31	68.3018
ENSG00000163975	MELTF	4241	NA	ENSG00000163975_MELTF	-4.18126	6.39353	-31.832	1.25544e-34	1.03591e-31	68.8717
ENSG00000129353	SLC44A2	57153	K7ESF5	ENSG00000129353_SLC44A2	-2.9704	7.40829	-31.6787	1.57679e-34	1.24193e-31	68.5993
ENSG00000171867	PRNP	5621	P04156	ENSG00000171867_PRNP	2.70715	8.82898	31.6117	1.74263e-34	1.31288e-31	68.4747
ENSG00000175793	SFN	2810	P31947	ENSG00000175793_SFN	2.08069	9.95742	31.3354	2.63708e-34	1.90397e-31	68.0499
ENSG00000087266	SH3BP2	6452	P78314	ENSG00000087266_SH3BP2	-3.18815	5.78484	-31.276	2.884e-34	1.99896e-31	68.0359
ENSG00000176092	AIM1L	55057	E9PIR9	ENSG00000176092_AIM1L	-3.95508	4.46881	-31.1527	3.47468e-34	2.31574e-31	67.762
ENSG00000171345	KRT19	3880	P08727	ENSG00000171345_KRT19	-6.94405	8.1877	-31.0122	4.29938e-34	2.75925e-31	67.6266
ENSG00000144815	NXPE3	91775	NA	ENSG00000144815_NXPE3	2.05546	5.31852	30.9664	4.60957e-34	2.81836e-31	67.5737
ENSG00000267795	SMIM22	440335	K7EJ46	ENSG00000267795_SMIM22	-7.50998	0.704139	-30.9513	4.71678e-34	2.81836e-31	64.2572
ENSG00000164086	DUSP7	1849	Q16829	ENSG00000164086_DUSP7	2.12223	7.20242	30.6084	7.97107e-34	4.45557e-31	66.9634
ENSG00000181885	CLDN7	1366	O95471	ENSG00000181885_CLDN7	-4.99502	5.65141	-30.5714	8.43711e-34	4.5687e-31	66.9595
ENSG00000163565	IFI16	3428	H3BVE6	ENSG00000163565_IFI16	1.89014	7.23264	30.364	1.16224e-33	6.10282e-31	66.5833
ENSG00000161921	CXCL16	58191	Q9H2A7	ENSG00000161921_CXCL16	-3.45272	5.61041	-30.3315	1.22225e-33	6.22915e-31	66.6025
ENSG00000134317	GRHL1	29841	F8WFB0	ENSG00000134317_GRHL1	-3.6576	5.5233	-30.2596	1.36662e-33	6.76595e-31	66.4916
ENSG00000257093	KIAA1147	57189	A4D1U4	ENSG00000257093_KIAA1147	-1.53074	6.32295	-30.1412	1.64311e-33	7.69509e-31	66.2508
ENSG00000163435	ELF3	1999	P78545	ENSG00000163435_ELF3	-7.01291	4.93119	-30.1554	1.60711e-33	7.69509e-31	66.0448
ENSG00000185614	FAM212A	389119	Q96EL1	ENSG00000185614_FAM212A	3.28709	2.09724	30.0507	1.89253e-33	8.62993e-31	65.5284
ENSG00000136114	THSD1	55901	Q9NS62	ENSG00000136114_THSD1	3.76562	3.58093	29.9604	2.17986e-33	9.68528e-31	65.7942
ENSG00000155066	PROM2	150696	Q8N271	ENSG00000155066_PROM2	-2.56881	7.80033	-29.9049	2.37821e-33	1.00511e-30	65.8532
ENSG00000141934	PLPP2	8612	O43688	ENSG00000141934_PLPP2	-2.9317	5.07483	-29.9091	2.3624e-33	1.00511e-30	65.9454
ENSG00000186350	RXRA	6256	NA	ENSG00000186350_RXRA	1.62357	6.31455	29.8436	2.6187e-33	1.0804e-30	65.7956
ENSG00000019549	SNAI2	6591	O43623	ENSG00000019549_SNAI2	4.07269	5.7842	29.799	2.80876e-33	1.13187e-30	65.7721
ENSG00000185499	MUC1	4582	A0A0C4DGW3	ENSG00000185499_MUC1	-7.27756	5.54255	-29.5775	3.98635e-33	1.5699e-30	65.2328
ENSG00000167306	MYO5B	4645	Q9ULV0	ENSG00000167306_MYO5B	-3.48959	6.59741	-29.5379	4.24467e-33	1.63448e-30	65.3254
ENSG00000110400	NECTIN1	5818	NA	ENSG00000110400_NECTIN1	2.37975	8.09995	29.294	6.26169e-33	2.30856e-30	64.8722
ENSG00000107130	NCS1	23413	P62166	ENSG00000107130_NCS1	1.35786	6.81279	29.2965	6.23577e-33	2.30856e-30	64.8949
ENSG00000178184	PARD6G	84552	Q9BYG4	ENSG00000178184_PARD6G	4.0164	4.09547	28.9941	1.01371e-32	3.65949e-30	64.4012
ENSG00000131089	ARHGEF9	23229	O43307	ENSG00000131089_ARHGEF9	-1.62788	5.30179	-28.9267	1.13037e-32	3.99737e-30	64.3647
ENSG00000149948	HMGA2	8091	P52926	ENSG00000149948_HMGA2	3.52398	5.58142	28.9073	1.1664e-32	4.04228e-30	64.3461
ENSG00000137802	MAPKBP1	23005	D6RHX7	ENSG00000137802_MAPKBP1	1.43363	6.05929	28.8417	1.29735e-32	4.40795e-30	64.1824
ENSG00000183762	KREMEN1	83999	Q96MU8	ENSG00000183762_KREMEN1	3.35898	4.87238	28.829	1.32418e-32	4.41258e-30	64.2188
ENSG00000197461	PDGFA	5154	P04085	ENSG00000197461_PDGFA	2.061	4.93344	28.7796	1.43475e-32	4.69082e-30	64.14
ENSG00000185187	SIGIRR	59307	H0YDR5	ENSG00000185187_SIGIRR	-2.92951	2.86214	-28.7562	1.49047e-32	4.78277e-30	63.937
ENSG00000162522	KIAA1522	57648	Q9P206	ENSG00000162522_KIAA1522	-1.16457	8.03696	-28.6262	1.84224e-32	5.80406e-30	63.7763
ENSG00000050405	LIMA1	51474	F8VS07	ENSG00000050405_LIMA1	1.8682	8.6928	28.4746	2.36062e-32	7.19789e-30	63.5217
ENSG00000184349	EFNA5	1946	P52803	ENSG00000184349_EFNA5	-1.8176	6.1127	-28.4728	2.36773e-32	7.19789e-30	63.5855
ENSG00000164116	GUCY1A3	2982	Q02108	ENSG00000164116_GUCY1A3	-6.05334	5.03527	-28.2882	3.20801e-32	9.5842e-30	63.274
ENSG00000138821	SLC39A8	64116	Q9C0K1	ENSG00000138821_SLC39A8	-2.22142	7.09547	-28.2409	3.46882e-32	1.01877e-29	63.1619
ENSG00000100364	KIAA0930	23313	Q6ICG6	ENSG00000100364_KIAA0930	1.5824	7.44895	28.1895	3.7765e-32	1.09065e-29	63.0696
ENSG00000196781	TLE1	7088	Q04724	ENSG00000196781_TLE1	-1.27761	5.36977	-28.1188	4.24556e-32	1.20602e-29	63.0295
ENSG00000141655	TNFRSF11A	8792	NA	ENSG00000141655_TNFRSF11A	-3.26835	3.76601	-28.0402	4.83768e-32	1.35205e-29	62.8407
ENSG00000156711	MAPK13	5603	NA	ENSG00000156711_MAPK13	-2.93065	5.274	-27.7957	7.27553e-32	2.00112e-29	62.5168
ENSG00000090776	EFNB1	1947	P98172	ENSG00000090776_EFNB1	2.39739	7.0595	27.7161	8.31571e-32	2.22389e-29	62.2955
ENSG00000015475	BID	637	P55957	ENSG00000015475_BID	-2.03701	5.5686	-27.7142	8.34217e-32	2.22389e-29	62.3506
ENSG00000166971	AKTIP	64400	Q9H8T0	ENSG00000166971_AKTIP	-1.36852	3.70723	-27.6439	9.38876e-32	2.46498e-29	62.2635
ENSG00000131941	RHPN2	85415	NA	ENSG00000131941_RHPN2	-3.1835	4.16635	-27.5696	1.06415e-31	2.75218e-29	62.1354
ENSG00000163072	NOSTRIN	115677	Q8IVI9	ENSG00000163072_NOSTRIN	-6.18199	-1.54106	-27.5197	1.15787e-31	2.95054e-29	58.856
ENSG00000165905	LARGE2	120071	E9PIZ2	ENSG00000165905_LARGE2	3.51228	4.58601	27.4969	1.20341e-31	3.02214e-29	62.022
ENSG00000171488	LRRC8C	84230	Q8TDW0	ENSG00000171488_LRRC8C	2.99283	5.11982	27.4268	1.35509e-31	3.35444e-29	61.8998
ENSG00000121690	DEPDC7	91614	Q96QD5	ENSG00000121690_DEPDC7	3.07596	2.04458	27.3605	1.51629e-31	3.70061e-29	61.4162
ENSG00000023892	DEF6	50619	Q9H4E7	ENSG00000023892_DEF6	1.69908	4.20578	27.3409	1.56778e-31	3.77312e-29	61.7603
ENSG00000205060	SLC35B4	84912	Q969S0	ENSG00000205060_SLC35B4	1.28036	5.55249	27.3213	1.62086e-31	3.84744e-29	61.6666
ENSG00000159788	RGS12	6002	NA	ENSG00000159788_RGS12	1.51687	5.49402	27.2583	1.80463e-31	4.22576e-29	61.5695
ENSG00000166619	BLCAP	10904	NA	ENSG00000166619_BLCAP	1.29253	7.00393	27.239	1.86505e-31	4.30902e-29	61.4637
ENSG00000139318	DUSP6	1848	Q16828	ENSG00000139318_DUSP6	2.64127	7.53751	27.1001	2.36491e-31	5.39199e-29	61.2224
ENSG00000134874	DZIP1	22873	Q86YF9	ENSG00000134874_DZIP1	2.84509	4.50563	27.0831	2.4348e-31	5.47924e-29	61.3212
ENSG00000214022	REPIN1	29803	E7EVL6	ENSG00000214022_REPIN1	-2.23817	5.33822	-27.0492	2.58038e-31	5.73242e-29	61.2309
ENSG00000178467	P4HTM	54681	Q9NXG6	ENSG00000178467_P4HTM	-2.50844	3.60788	-27.0068	2.77531e-31	6.08742e-29	61.1683
ENSG00000160691	SHC1	6464	P29353	ENSG00000160691_SHC1	1.99614	8.7188	26.9549	3.03444e-31	6.5726e-29	60.9439
ENSG00000158528	PPP1R9A	55607	C9J730	ENSG00000158528_PPP1R9A	-7.03647	1.52181	-26.9232	3.20491e-31	6.85613e-29	59.3449
ENSG00000134531	EMP1	2012	P54849	ENSG00000134531_EMP1	-2.57262	9.39069	-26.8935	3.37299e-31	7.1277e-29	60.8328
ENSG00000164543	STK17A	9263	NA	ENSG00000164543_STK17A	2.06781	7.19845	26.8501	3.63544e-31	7.58975e-29	60.7873
ENSG00000182580	EPHB3	2049	P54753	ENSG00000182580_EPHB3	-2.71849	5.46206	-26.8409	3.69377e-31	7.61972e-29	60.884
ENSG00000130940	CASZ1	54897	Q86V15	ENSG00000130940_CASZ1	-1.86378	5.84801	-26.8322	3.74971e-31	7.64412e-29	60.8153
ENSG00000235750	KIAA0040	9674	J3QR46	ENSG00000235750_KIAA0040	1.32763	6.72975	26.8038	3.9384e-31	7.93541e-29	60.7211
ENSG00000122591	FAM126A	84668	NA	ENSG00000122591_FAM126A	1.64087	6.43441	26.7728	4.15595e-31	8.27751e-29	60.6802
ENSG00000146674	IGFBP3	3486	B3KWK7	ENSG00000146674_IGFBP3	-7.54864	6.12903	-26.6935	4.76806e-31	9.38874e-29	60.6317
ENSG00000116141	MARK1	4139	Q9P0L2	ENSG00000116141_MARK1	4.46363	2.57406	26.5751	5.85951e-31	1.14083e-28	60.0433
ENSG00000114270	COL7A1	100313843	NA	ENSG00000114270_COL7A1	3.43728	7.52542	26.5563	6.0547e-31	1.15292e-28	60.2762
ENSG00000157657	ZNF618	114991	Q5T7W0	ENSG00000157657_ZNF618	3.05595	4.98632	26.5606	6.0086e-31	1.15292e-28	60.413
ENSG00000073282	TP63	8626	NA	ENSG00000073282_TP63	4.93815	6.66646	26.5074	6.5932e-31	1.22503e-28	60.294
ENSG00000197565	COL4A6	1288	Q14031	ENSG00000197565_COL4A6	3.55365	5.37692	26.5029	6.64549e-31	1.22503e-28	60.3154
ENSG00000157168	NRG1	3084	E7EX30	ENSG00000157168_NRG1	4.75203	5.15166	26.391	8.08399e-31	1.47244e-28	60.1236
ENSG00000166130	IKBIP	121457	Q70UQ0	ENSG00000166130_IKBIP	2.25403	5.25278	26.3858	8.15758e-31	1.47244e-28	60.0819
ENSG00000164626	KCNK5	8645	O95279	ENSG00000164626_KCNK5	-5.73636	3.4735	-26.3651	8.45921e-31	1.51115e-28	59.7351
ENSG00000023445	BIRC3	330	NA	ENSG00000023445_BIRC3	-4.19552	5.4752	-26.2796	9.8319e-31	1.73844e-28	59.9209
ENSG00000188505	NCCRP1	342897	Q6ZVX7	ENSG00000188505_NCCRP1	-7.77978	3.60713	-26.2633	1.01176e-30	1.77089e-28	59.132
ENSG00000095739	BAMBI	25805	Q13145	ENSG00000095739_BAMBI	-2.8077	3.07752	-26.2409	1.05255e-30	1.82387e-28	59.7975
ENSG00000175183	CSRP2	1466	Q16527	ENSG00000175183_CSRP2	2.43657	3.71821	26.1931	1.14496e-30	1.96434e-28	59.767
ENSG00000134109	EDEM1	9695	F8WER9	ENSG00000134109_EDEM1	1.06272	7.49106	26.125	1.29145e-30	2.19395e-28	59.4947
ENSG00000118849	RARRES1	5918	P49788	ENSG00000118849_RARRES1	-8.42279	6.58571	-26.0841	1.38849e-30	2.33589e-28	59.5557
ENSG00000114861	FOXP1	27086	Q9H334	ENSG00000114861_FOXP1	1.84427	6.56261	26.0386	1.505e-30	2.50755e-28	59.3827
ENSG00000134369	NAV1	89796	A0A0A0MRJ3	ENSG00000134369_NAV1	2.05692	8.00307	26.0146	1.57052e-30	2.5918e-28	59.2922
ENSG00000111846	GCNT2	2651	B7ZBL3	ENSG00000111846_GCNT2	-7.89495	2.29624	-25.907	1.90208e-30	3.10936e-28	57.8845
ENSG00000078967	UBE2D4	51619	F2Z3J6	ENSG00000078967_UBE2D4	-1.23367	3.79723	-25.875	2.01358e-30	3.26087e-28	59.2145
ENSG00000167106	FAM102A	399665	Q5T9C2	ENSG00000167106_FAM102A	-1.99071	5.40245	-25.8247	2.20286e-30	3.53437e-28	59.0717
ENSG00000112343	TRIM38	10475	O00635	ENSG00000112343_TRIM38	-1.22228	5.55796	-25.8101	2.26111e-30	3.59454e-28	59.0122
ENSG00000086570	FAT2	2196	H0YBK2	ENSG00000086570_FAT2	2.34897	7.94025	25.7983	2.30926e-30	3.60495e-28	58.9074
ENSG00000109654	TRIM2	23321	NA	ENSG00000109654_TRIM2	-3.10578	6.49028	-25.8005	2.30017e-30	3.60495e-28	58.9815
ENSG00000082438	COBLL1	22837	NA	ENSG00000082438_COBLL1	1.7621	5.619	25.7809	2.38241e-30	3.68592e-28	58.9737
ENSG00000089060	SLC8B1	80024	Q6J4K2	ENSG00000089060_SLC8B1	-1.47545	4.59391	-25.7712	2.42393e-30	3.71697e-28	59.0131
ENSG00000130590	SAMD10	140700	Q9BYL1	ENSG00000130590_SAMD10	-2.23957	2.56799	-25.7122	2.69428e-30	4.0953e-28	58.8383
ENSG00000158106	RHPN1	114822	Q8TCX5	ENSG00000158106_RHPN1	-3.83075	3.23303	-25.7034	2.7373e-30	4.12452e-28	58.8293
ENSG00000168785	TSPAN5	10098	D6RAR1	ENSG00000168785_TSPAN5	3.00178	4.36108	25.6477	3.02524e-30	4.5155e-28	58.8079
ENSG00000167880	EVPL	2125	K7EQ87	ENSG00000167880_EVPL	-2.40236	5.54595	-25.6433	3.0489e-30	4.5155e-28	58.7365
ENSG00000188290	HES4	57801	E9PB28	ENSG00000188290_HES4	-4.87289	2.65059	-25.6145	3.21131e-30	4.71573e-28	58.429
ENSG00000196812	ZSCAN16	80345	Q9H4T2	ENSG00000196812_ZSCAN16	-2.35981	1.6381	-25.6051	3.26584e-30	4.7555e-28	58.3966
ENSG00000110719	TCIRG1	10312	Q13488	ENSG00000110719_TCIRG1	-2.10015	5.32434	-25.5552	3.57334e-30	5.1599e-28	58.5712
ENSG00000138771	SHROOM3	57619	Q8TF72	ENSG00000138771_SHROOM3	-1.33695	7.38161	-25.4365	4.42836e-30	6.3417e-28	58.2558
ENSG00000094755	GABRP	2568	E5RG98	ENSG00000094755_GABRP	-8.83627	6.97563	-25.3483	5.19612e-30	7.38019e-28	58.2665
ENSG00000206069	TMEM211	255349	A0A0C4DG04	ENSG00000206069_TMEM211	-4.69785	-2.4942	-25.062	8.76085e-30	1.22426e-27	55.1277
ENSG00000169515	CCDC8	83987	Q9H0W5	ENSG00000169515_CCDC8	3.69111	5.34895	25.039	9.13798e-30	1.25669e-27	57.6883
ENSG00000152661	GJA1	2697	P17302	ENSG00000152661_GJA1	3.27262	6.59151	25.0425	9.08063e-30	1.25669e-27	57.6033
ENSG00000109667	SLC2A9	56606	NA	ENSG00000109667_SLC2A9	3.46123	4.61893	25.0303	9.28487e-30	1.26684e-27	57.6896
ENSG00000003147	ICA1	3382	Q05084	ENSG00000003147_ICA1	-3.76567	3.28123	-24.908	1.16273e-29	1.57404e-27	57.3992
ENSG00000139044	B4GALNT3	283358	Q6L9W6	ENSG00000139044_B4GALNT3	-4.06343	4.35443	-24.8711	1.24469e-29	1.67193e-27	57.3924
ENSG00000143217	NECTIN4	81607	Q96NY8	ENSG00000143217_NECTIN4	-5.46984	3.81429	-24.8293	1.34464e-29	1.7923e-27	57.1916
ENSG00000128342	LIF	3976	P15018	ENSG00000128342_LIF	-4.15696	6.10305	-24.8029	1.41179e-29	1.86744e-27	57.1869
ENSG00000125730	C3	718	P01024	ENSG00000125730_C3	-6.95222	7.78121	-24.7689	1.50361e-29	1.97383e-27	57.1507
ENSG00000134569	LRP4	4038	O75096	ENSG00000134569_LRP4	4.85928	2.48922	24.7569	1.53749e-29	2.00234e-27	56.799
ENSG00000073969	NSF	4905	K7EQD6	ENSG00000073969_NSF	-1.09406	5.7077	-24.753	1.54844e-29	2.00234e-27	57.0702
ENSG00000121297	TSHZ3	57616	Q63HK5	ENSG00000121297_TSHZ3	4.04127	3.4714	24.698	1.71493e-29	2.20121e-27	56.9692
ENSG00000033327	GAB2	9846	Q9UQC2	ENSG00000033327_GAB2	-4.25151	2.60952	-24.6783	1.77875e-29	2.26634e-27	56.7988
ENSG00000075618	FSCN1	6624	Q16658	ENSG00000075618_FSCN1	1.57473	9.14899	24.556	2.23365e-29	2.82516e-27	56.5928
ENSG00000123892	RAB38	23682	P57729	ENSG00000123892_RAB38	3.072	5.3225	24.5159	2.4073e-29	3.02273e-27	56.6959
ENSG00000132698	RAB25	57111	P57735	ENSG00000132698_RAB25	-1.88035	6.07149	-24.4585	2.68007e-29	3.34103e-27	56.5024
ENSG00000179178	TMEM125	128218	Q96AQ2	ENSG00000179178_TMEM125	-3.71907	2.37842	-24.4075	2.94888e-29	3.64987e-27	56.3257
ENSG00000174791	RIN1	9610	NA	ENSG00000174791_RIN1	1.8452	5.1433	24.3938	3.02553e-29	3.692e-27	56.4403
ENSG00000171219	CDC42BPG	55561	Q6DT37	ENSG00000171219_CDC42BPG	-1.34598	6.17584	-24.3943	3.02282e-29	3.692e-27	56.3586
ENSG00000198018	ENTPD7	57089	Q9NQZ7	ENSG00000198018_ENTPD7	1.66286	5.7425	24.3334	3.38925e-29	4.10691e-27	56.2841
ENSG00000149527	PLCH2	9651	V9GY64	ENSG00000149527_PLCH2	4.20059	5.2473	24.2944	3.6476e-29	4.359e-27	56.3027
ENSG00000050165	DKK3	27122	NA	ENSG00000050165_DKK3	4.19875	6.16959	24.2949	3.64392e-29	4.359e-27	56.2594
ENSG00000178531	CTXN1	404217	P60606	ENSG00000178531_CTXN1	-3.54256	3.16725	-24.2892	3.68343e-29	4.37168e-27	56.2724
ENSG00000126016	AMOT	100423009	Q4VCS5	ENSG00000126016_AMOT	-6.53763	2.27977	-24.279	3.75481e-29	4.42608e-27	55.4864
ENSG00000074527	NTN4	59277	Q9HB63	ENSG00000074527_NTN4	-2.96616	6.52829	-24.2296	4.12156e-29	4.82557e-27	56.0621
ENSG00000135373	EHF	26298	NA	ENSG00000135373_EHF	-5.28154	5.98765	-24.1831	4.49926e-29	5.23243e-27	56.1036
ENSG00000113645	WWC1	23286	Q8IX03	ENSG00000113645_WWC1	-1.66656	6.33413	-24.1689	4.62239e-29	5.30443e-27	55.9316
ENSG00000111344	RASAL1	8437	O95294	ENSG00000111344_RASAL1	-7.33648	3.13933	-24.1699	4.6133e-29	5.30443e-27	55.4684
ENSG00000101000	PROCR	10544	Q9UNN8	ENSG00000101000_PROCR	2.93969	4.84451	24.1326	4.95071e-29	5.64381e-27	56.0063
ENSG00000133808	MICALCL	84953	NA	ENSG00000133808_MICALCL	2.60255	4.27238	24.0931	5.3357e-29	6.04294e-27	55.9396
ENSG00000125148	MT2A	4502	P02795	ENSG00000125148_MT2A	3.10789	9.27943	24.064	5.63839e-29	6.34428e-27	55.6604
ENSG00000102230	PCYT1B	9468	Q9Y5K3	ENSG00000102230_PCYT1B	3.49632	3.66469	24.0479	5.81308e-29	6.41587e-27	55.8382
ENSG00000184731	FAM110C	642273	Q1W6H9	ENSG00000184731_FAM110C	2.16106	5.83639	24.0494	5.79672e-29	6.41587e-27	55.7467
ENSG00000106078	COBL	23242	J3KR05	ENSG00000106078_COBL	-5.31612	3.84214	-24.0504	5.78548e-29	6.41587e-27	55.7712
ENSG00000158246	FAM46B	115572	Q96A09	ENSG00000158246_FAM46B	-2.17571	4.92888	-24.0091	6.2582e-29	6.84374e-27	55.7396
ENSG00000272087	RP11-379F4.7	NA	NA	ENSG00000272087_RP11-379F4.7	-7.52474	-0.577622	-24.0073	6.27975e-29	6.84374e-27	53.6602
ENSG00000088970	KIZ	55857	Q2M2Z5	ENSG00000088970_KIZ	2.37147	4.1308	23.9927	6.45658e-29	6.99248e-27	55.7532
ENSG00000177570	SAMD12	401474	H0Y632	ENSG00000177570_SAMD12	-3.49791	4.14368	-23.9783	6.63546e-29	7.14157e-27	55.7291
ENSG00000091409	ITGA6	3655	C9JXX7	ENSG00000091409_ITGA6	2.6708	10.1002	23.9502	7.00149e-29	7.489e-27	55.4368
ENSG00000048740	CELF2	10659	NA	ENSG00000048740_CELF2	-5.31758	3.03867	-23.9352	7.20377e-29	7.65809e-27	55.389
ENSG00000133985	TTC9	23508	Q92623	ENSG00000133985_TTC9	-3.68795	5.07444	-23.9176	7.44963e-29	7.87117e-27	55.5984
ENSG00000250786	SNHG18	NA	NA	ENSG00000250786_SNHG18	4.69167	1.89837	23.9083	7.5838e-29	7.96436e-27	55.1341
ENSG00000197822	OCLN	100506658	Q16625	ENSG00000197822_OCLN	-4.24596	3.28502	-23.8973	7.74414e-29	8.08377e-27	55.4974
ENSG00000233901	LINC01503	100506119	NA	ENSG00000233901_LINC01503	2.76829	2.17229	23.8783	8.03084e-29	8.30563e-27	55.3757
ENSG00000189143	CLDN4	1364	NA	ENSG00000189143_CLDN4	-6.00737	5.12915	-23.8769	8.05255e-29	8.30563e-27	55.5327
ENSG00000179299	NSUN7	79730	Q8NE18	ENSG00000179299_NSUN7	-6.8783	-0.393938	-23.8702	8.15632e-29	8.36288e-27	53.6353
ENSG00000197147	LRRC8B	23507	C9JGJ7	ENSG00000197147_LRRC8B	-1.70944	4.95823	-23.8647	8.242e-29	8.40102e-27	55.4478
ENSG00000089159	PXN	5829	P49023	ENSG00000089159_PXN	1.01879	9.06903	23.7542	1.01838e-28	1.03196e-26	55.0567
ENSG00000143653	SCCPDH	51097	Q8NBX0	ENSG00000143653_SCCPDH	-1.76336	4.76215	-23.7254	1.0763e-28	1.08431e-26	55.1896
ENSG00000237330	RNF223	401934	E7ERA6	ENSG00000237330_RNF223	-6.22188	-0.739868	-23.6859	1.16124e-28	1.16312e-26	53.4664
ENSG00000141736	ERBB2	2064	P04626	ENSG00000141736_ERBB2	-1.37419	7.2171	-23.6727	1.19125e-28	1.18632e-26	54.9351
ENSG00000187796	CARD9	64170	NA	ENSG00000187796_CARD9	-4.27545	1.70039	-23.5861	1.4075e-28	1.39366e-26	54.6118
ENSG00000120820	GLT8D2	83468	Q9H1C3	ENSG00000120820_GLT8D2	2.85175	3.63841	23.5618	1.47509e-28	1.4523e-26	54.9273
ENSG00000198121	LPAR1	1902	Q92633	ENSG00000198121_LPAR1	4.67203	3.08587	23.5526	1.50174e-28	1.47018e-26	54.7724
ENSG00000134909	ARHGAP32	9743	A7KAX9	ENSG00000134909_ARHGAP32	-1.33883	6.67031	-23.5408	1.53646e-28	1.48736e-26	54.6934
ENSG00000153714	LURAP1L	286343	Q8IV03	ENSG00000153714_LURAP1L	-2.23429	5.04172	-23.5418	1.53332e-28	1.48736e-26	54.8191
ENSG00000087903	RFX2	5990	P48378	ENSG00000087903_RFX2	2.29308	3.03141	23.5341	1.55641e-28	1.49002e-26	54.8598
ENSG00000131981	LGALS3	3958	G3V407	ENSG00000131981_LGALS3	-1.68011	7.43715	-23.5356	1.55188e-28	1.49002e-26	54.6618
ENSG00000198369	SPRED2	200734	Q7Z698	ENSG00000198369_SPRED2	1.35662	6.0597	23.4244	1.92512e-28	1.83288e-26	54.5016
ENSG00000008853	RHOBTB2	23221	Q9BYZ6	ENSG00000008853_RHOBTB2	2.47114	5.5757	23.4208	1.93843e-28	1.83547e-26	54.5551
ENSG00000171056	SOX7	83595	Q9BT81	ENSG00000171056_SOX7	3.14725	4.00638	23.3915	2.0519e-28	1.93235e-26	54.6055
ENSG00000151474	FRMD4A	55691	Q9P2Q2	ENSG00000151474_FRMD4A	1.89198	5.13561	23.3818	2.09101e-28	1.95854e-26	54.4961
ENSG00000132003	ZSWIM4	65249	Q9H7M6	ENSG00000132003_ZSWIM4	-2.39641	4.23799	-23.3575	2.19254e-28	2.04259e-26	54.5205
ENSG00000081923	ATP8B1	5205	O43520	ENSG00000081923_ATP8B1	-1.54859	6.04489	-23.2677	2.61198e-28	2.42034e-26	54.2057
ENSG00000165152	TMEM246	84302	Q9BRR3	ENSG00000165152_TMEM246	4.19788	3.14588	23.2448	2.73149e-28	2.51188e-26	54.1912
ENSG00000173890	GPR160	26996	Q9UJ42	ENSG00000173890_GPR160	-4.42019	0.786212	-23.2432	2.73976e-28	2.51188e-26	53.5019
ENSG00000167767	KRT80	144501	Q6KB66	ENSG00000167767_KRT80	-5.95813	4.91108	-23.2347	2.78609e-28	2.54091e-26	54.2953
ENSG00000159314	ARHGAP27	201176	E9PNT2	ENSG00000159314_ARHGAP27	-1.23234	5.58678	-23.2076	2.93726e-28	2.66475e-26	54.0961
ENSG00000069956	MAPK6	5597	NA	ENSG00000069956_MAPK6	1.15415	7.28866	23.1972	2.99776e-28	2.70548e-26	53.9935
ENSG00000183963	SMTN	6525	C9JBH9	ENSG00000183963_SMTN	1.83285	7.5993	23.1262	3.44537e-28	3.09333e-26	53.8446
ENSG00000084636	COL16A1	1307	Q07092	ENSG00000084636_COL16A1	1.98217	6.61634	23.1081	3.57041e-28	3.18907e-26	53.8532
ENSG00000001561	ENPP4	22875	Q9Y6X5	ENSG00000001561_ENPP4	-3.8687	3.13661	-23.0605	3.91995e-28	3.48333e-26	53.9144
ENSG00000142677	IL22RA1	58985	Q8N6P7	ENSG00000142677_IL22RA1	3.57019	1.17089	23.0515	3.99028e-28	3.50983e-26	53.4167
ENSG00000151914	DST	667	Q03001	ENSG00000151914_DST	1.8397	9.76513	23.0529	3.97921e-28	3.50983e-26	53.6769
ENSG00000227036	LINC00511	400619	NA	ENSG00000227036_LINC00511	-2.05051	5.62498	-22.9901	4.50313e-28	3.94092e-26	53.6805
ENSG00000078124	ACER3	55331	E9PIN9	ENSG00000078124_ACER3	1.7155	6.85259	22.9868	4.53294e-28	3.94708e-26	53.5978
ENSG00000128641	MYO1B	4430	C9JYW1	ENSG00000128641_MYO1B	1.93496	9.13594	22.9812	4.58292e-28	3.97064e-26	53.5379
ENSG00000177459	ERICH5	203111	Q6P6B1	ENSG00000177459_ERICH5	-4.62053	0.407873	-22.9733	4.65486e-28	4.0129e-26	52.849
ENSG00000120162	MOB3B	79817	Q86TA1	ENSG00000120162_MOB3B	1.54423	6.02819	22.9688	4.69686e-28	4.02907e-26	53.61
ENSG00000101443	WFDC2	10406	Q14508	ENSG00000101443_WFDC2	-6.00494	4.71778	-22.9633	4.74804e-28	4.05291e-26	53.7534
ENSG00000092929	UNC13D	201294	K7EN29	ENSG00000092929_UNC13D	-2.69058	4.70745	-22.9566	4.81136e-28	4.08683e-26	53.7095
ENSG00000272327	NA	NA	NA	ENSG00000272327_NA	4.74464	3.17927	22.9195	5.1774e-28	4.37629e-26	53.5802
ENSG00000204764	RANBP17	64901	NA	ENSG00000204764_RANBP17	-2.53435	2.30793	-22.9059	5.31817e-28	4.47345e-26	53.6298
ENSG00000138829	FBN2	2201	P35556	ENSG00000138829_FBN2	4.64481	6.25622	22.8755	5.64843e-28	4.72574e-26	53.5202
ENSG00000110057	UNC93B1	81622	NA	ENSG00000110057_UNC93B1	-1.63638	4.66193	-22.8733	5.67264e-28	4.72574e-26	53.5287
ENSG00000117984	CTSD	1509	P07339	ENSG00000117984_CTSD	-2.23559	9.61584	-22.7971	6.59884e-28	5.47104e-26	53.1683
ENSG00000196754	S100A2	6273	P29034	ENSG00000196754_S100A2	3.15174	10.8153	22.7833	6.78254e-28	5.59541e-26	53.1414
ENSG00000103534	TMC5	79838	NA	ENSG00000103534_TMC5	-4.35697	3.53184	-22.781	6.81343e-28	5.59541e-26	53.3777
ENSG00000165655	ZNF503	84858	Q96F45	ENSG00000165655_ZNF503	3.17836	3.78177	22.767	7.0059e-28	5.72633e-26	53.3741
ENSG00000128805	ARHGAP22	58504	Q7Z5H3	ENSG00000128805_ARHGAP22	2.1761	3.871	22.7396	7.39819e-28	6.01858e-26	53.3179
ENSG00000103044	HAS3	3038	O00219	ENSG00000103044_HAS3	3.89293	6.9648	22.7272	7.58217e-28	6.13943e-26	53.1382
ENSG00000026025	VIM	7431	NA	ENSG00000026025_VIM	2.93409	9.2701	22.7177	7.72705e-28	6.22765e-26	53.0121
ENSG00000134755	DSC2	1824	Q02487	ENSG00000134755_DSC2	-2.23083	8.24499	-22.7098	7.85001e-28	6.29745e-26	53.0073
ENSG00000165071	TMEM71	137835	NA	ENSG00000165071_TMEM71	-6.5764	-1.40615	-22.6816	8.30449e-28	6.63134e-26	51.3469
ENSG00000160190	SLC37A1	54020	NA	ENSG00000160190_SLC37A1	-2.01029	4.46666	-22.6635	8.60901e-28	6.84297e-26	53.1403
ENSG00000182916	TCEAL7	56849	Q9BRU2	ENSG00000182916_TCEAL7	5.09309	0.0783986	22.6538	8.77768e-28	6.94519e-26	52.0869
ENSG00000182957	SPATA13	221178	Q96N96	ENSG00000182957_SPATA13	-2.46397	2.81041	-22.5496	1.08131e-27	8.47827e-26	52.9429
ENSG00000173269	MMRN2	79812	Q9H8L6	ENSG00000173269_MMRN2	3.53239	2.62044	22.5184	1.15106e-27	8.98449e-26	52.7819
ENSG00000246228	CASC8	727677	NA	ENSG00000246228_CASC8	-3.29932	0.721499	-22.4636	1.28494e-27	9.98447e-26	52.2745
ENSG00000167323	STIM1	100616453	E9PRZ7	ENSG00000167323_STIM1	-1.09401	7.12793	-22.4323	1.36836e-27	1.05853e-25	52.4664
ENSG00000118200	CAMSAP2	23271	Q08AD1	ENSG00000118200_CAMSAP2	1.14728	7.11149	22.3823	1.51351e-27	1.1656e-25	52.3615
ENSG00000114805	PLCH1	23007	Q4KWH8	ENSG00000114805_PLCH1	-4.41447	1.28378	-22.3673	1.5599e-27	1.19601e-25	52.0421
ENSG00000178685	PARP10	84875	NA	ENSG00000178685_PARP10	-1.43265	4.19697	-22.3013	1.78243e-27	1.36061e-25	52.4057
ENSG00000145934	TENM2	57451	Q9NT68	ENSG00000145934_TENM2	4.36215	6.11595	22.2868	1.83564e-27	1.39509e-25	52.3249
ENSG00000107679	PLEKHA1	59338	NA	ENSG00000107679_PLEKHA1	1.49258	6.57895	22.2725	1.88932e-27	1.42961e-25	52.1639
ENSG00000111816	FRK	2444	P42685	ENSG00000111816_FRK	-1.66055	5.28405	-22.264	1.9222e-27	1.44817e-25	52.2517
ENSG00000076826	CAMSAP3	57662	Q9P1Y5	ENSG00000076826_CAMSAP3	-1.50447	4.63133	-22.2422	2.00892e-27	1.50695e-25	52.2525
ENSG00000186462	NAP1L2	4674	Q9ULW6	ENSG00000186462_NAP1L2	3.89763	0.48197	22.194	2.21556e-27	1.64769e-25	51.5001
ENSG00000196547	MAN2A2	4122	H0YMU0	ENSG00000196547_MAN2A2	-1.38984	5.79238	-22.1525	2.41053e-27	1.78503e-25	51.9568
ENSG00000133131	MORC4	79710	S4R3U3	ENSG00000133131_MORC4	1.13933	5.28108	22.1367	2.48923e-27	1.83546e-25	51.9838
ENSG00000161714	PLCD3	113026	Q8N3E9	ENSG00000161714_PLCD3	1.60528	6.13083	22.1171	2.59044e-27	1.898e-25	51.8803
ENSG00000174125	TLR1	7096	NA	ENSG00000174125_TLR1	-6.06766	2.95674	-22.1161	2.59594e-27	1.898e-25	51.8375
ENSG00000012061	ERCC1	2067	P07992	ENSG00000012061_ERCC1	1.64308	6.62764	22.1063	2.64832e-27	1.92815e-25	51.8226
ENSG00000129235	TXNDC17	84817	Q9BRA2	ENSG00000129235_TXNDC17	1.51735	6.99164	22.1029	2.6667e-27	1.93341e-25	51.7962
ENSG00000119888	EPCAM	4072	B5MCA4	ENSG00000119888_EPCAM	-1.77124	7.16916	-22.0678	2.86414e-27	2.06791e-25	51.7188
ENSG00000198125	MB	4151	Q8WVH6	ENSG00000198125_MB	-6.17837	-1.78466	-22.0175	3.1739e-27	2.28205e-25	50.0546
ENSG00000167641	PPP1R14A	94274	A0A0B4J2A3	ENSG00000167641_PPP1R14A	4.06785	2.83496	21.9891	3.3637e-27	2.40852e-25	51.7388
ENSG00000175832	ETV4	2118	P43268	ENSG00000175832_ETV4	1.63384	5.19584	21.961	3.56312e-27	2.5304e-25	51.6266
ENSG00000141449	GREB1L	80000	NA	ENSG00000141449_GREB1L	-6.64961	2.32532	-21.894	4.08784e-27	2.89119e-25	51.0909
ENSG00000132334	PTPRE	5791	P23469	ENSG00000132334_PTPRE	1.47352	5.75815	21.8811	4.19752e-27	2.92107e-25	51.406
ENSG00000129422	MTUS1	57509	NA	ENSG00000129422_MTUS1	-1.5444	6.91589	-21.8841	4.1716e-27	2.92107e-25	51.3493
ENSG00000174233	ADCY6	112	NA	ENSG00000174233_ADCY6	-1.74881	5.95274	-21.8826	4.18459e-27	2.92107e-25	51.4015
ENSG00000104081	BMF	90427	Q96LC9	ENSG00000104081_BMF	-3.66091	1.38463	-21.8862	4.15408e-27	2.92107e-25	51.315
ENSG00000117461	PIK3R3	8503	Q92569	ENSG00000117461_PIK3R3	-2.7888	6.0899	-21.8702	4.29274e-27	2.97538e-25	51.4109
ENSG00000134363	FST	10468	P19883	ENSG00000134363_FST	4.89764	6.21989	21.8283	4.67911e-27	3.23027e-25	51.4095
ENSG00000148735	PLEKHS1	79949	Q5SXH7	ENSG00000148735_PLEKHS1	-9.19581	1.40946	-21.7819	5.14836e-27	3.54011e-25	49.9393
ENSG00000198517	MAFK	7975	O60675	ENSG00000198517_MAFK	-1.03577	4.71082	-21.7493	5.50663e-27	3.75665e-25	51.2109
ENSG00000116260	QSOX1	5768	O00391	ENSG00000116260_QSOX1	-2.11313	8.16568	-21.7494	5.50561e-27	3.75665e-25	51.0392
ENSG00000137747	TMPRSS13	84000	Q9BYE2	ENSG00000137747_TMPRSS13	-7.79314	1.96735	-21.7439	5.56864e-27	3.78405e-25	50.4115
ENSG00000185088	RPS27L	51065	NA	ENSG00000185088_RPS27L	-1.31456	6.38271	-21.7182	5.87173e-27	3.96834e-25	51.0323
ENSG00000137709	POU2F3	25833	Q9UKI9	ENSG00000137709_POU2F3	-4.52132	0.18812	-21.7171	5.88564e-27	3.96834e-25	50.4598
ENSG00000165895	ARHGAP42	143872	E9PJK4	ENSG00000165895_ARHGAP42	-2.4451	2.87935	-21.711	5.95987e-27	4.00282e-25	51.2391
ENSG00000122971	ACADS	35	P16219	ENSG00000122971_ACADS	-1.85325	2.26594	-21.6947	6.16435e-27	4.12416e-25	51.1829
ENSG00000179403	VWA1	64856	J3QLP3	ENSG00000179403_VWA1	-3.01563	6.38077	-21.6855	6.28305e-27	4.18741e-25	51.0044
ENSG00000112902	SEMA5A	9037	Q13591	ENSG00000112902_SEMA5A	5.62051	3.24772	21.6606	6.6152e-27	4.39188e-25	51.0456
ENSG00000174099	MSRB3	253827	Q8IXL7	ENSG00000174099_MSRB3	3.89504	3.4714	21.6444	6.84089e-27	4.52439e-25	51.1071
ENSG00000184545	DUSP8	1850	Q13202	ENSG00000184545_DUSP8	-4.6413	1.65926	-21.6245	7.12947e-27	4.69732e-25	50.7661
ENSG00000171467	ZNF318	24149	NA	ENSG00000171467_ZNF318	1.17125	6.02298	21.6127	7.30591e-27	4.79534e-25	50.828
ENSG00000168398	BDKRB2	624	P30411	ENSG00000168398_BDKRB2	5.15965	3.41135	21.6004	7.4956e-27	4.88285e-25	50.9482
ENSG00000221963	APOL6	80830	Q9BWW8	ENSG00000221963_APOL6	-1.72044	6.3371	-21.6017	7.47555e-27	4.88285e-25	50.7985
ENSG00000013588	GPRC5A	693199	Q8NFJ5	ENSG00000013588_GPRC5A	-3.31541	8.75136	-21.5587	8.17409e-27	5.30489e-25	50.6368
ENSG00000145246	ATP10D	57205	Q9P241	ENSG00000145246_ATP10D	1.29079	6.63694	21.5508	8.309e-27	5.37233e-25	50.6706
ENSG00000176692	FOXC2	2303	Q99958	ENSG00000176692_FOXC2	4.84057	1.17461	21.5368	8.55377e-27	5.51003e-25	50.4355
ENSG00000139117	CPNE8	144402	NA	ENSG00000139117_CPNE8	4.51398	2.24769	21.4994	9.24714e-27	5.89212e-25	50.6385
ENSG00000013016	EHD3	30845	Q9NZN3	ENSG00000013016_EHD3	3.28443	4.85384	21.4993	9.24894e-27	5.89212e-25	50.7541
ENSG00000170421	KRT8	3856	P05787	ENSG00000170421_KRT8	-4.15164	8.26046	-21.4701	9.82988e-27	6.23927e-25	50.4699
ENSG00000234678	RP11-465N4.4	NA	NA	ENSG00000234678_RP11-465N4.4	-6.49269	-0.404979	-21.4188	1.09414e-26	6.91944e-25	49.3474
ENSG00000185442	FAM174B	400451	Q3ZCQ3	ENSG00000185442_FAM174B	-4.39745	1.28834	-21.4084	1.11818e-26	7.04576e-25	50.2123
ENSG00000237685	RP11-360O19.4	NA	NA	ENSG00000237685_RP11-360O19.4	-4.15076	-3.29645	-21.4054	1.12537e-26	7.06537e-25	48.4905
ENSG00000182272	B4GALNT4	338707	NA	ENSG00000182272_B4GALNT4	-3.5273	3.59446	-21.3899	1.16247e-26	7.27196e-25	50.5817
ENSG00000196368	NUDT11	55190	Q96G61	ENSG00000196368_NUDT11	5.16042	1.90617	21.3617	1.23302e-26	7.68555e-25	50.1843
ENSG00000064547	LPAR2	9170	Q9HBW0	ENSG00000064547_LPAR2	-1.28806	4.47272	-21.3578	1.24313e-26	7.72079e-25	50.4244
ENSG00000156675	RAB11FIP1	80223	Q6WKZ4	ENSG00000156675_RAB11FIP1	-2.67992	6.42387	-21.3459	1.27455e-26	7.86827e-25	50.2736
ENSG00000167363	FN3K	64122	Q9H479	ENSG00000167363_FN3K	-2.73556	1.66615	-21.3454	1.27596e-26	7.86827e-25	50.3764
ENSG00000167779	IGFBP6	3489	F8VYK9	ENSG00000167779_IGFBP6	3.18066	5.61224	21.3314	1.31392e-26	8.04506e-25	50.3518
ENSG00000166348	USP54	159195	H7C296	ENSG00000166348_USP54	-1.84679	5.32383	-21.3275	1.32476e-26	8.08293e-25	50.3022
ENSG00000152078	TMEM56	148534	Q96MV1	ENSG00000152078_TMEM56	-3.56654	2.5481	-21.3251	1.33144e-26	8.09512e-25	50.401
ENSG00000172031	EPHX4	253152	Q8IUS5	ENSG00000172031_EPHX4	-3.04622	2.70475	-21.3159	1.35723e-26	8.21091e-25	50.4013
ENSG00000174502	SLC26A9	115019	Q7LBE3	ENSG00000174502_SLC26A9	-5.12361	-2.48345	-21.315	1.35996e-26	8.21091e-25	48.6895
ENSG00000235884	LINC00941	NA	NA	ENSG00000235884_LINC00941	3.86918	1.87701	21.2979	1.40954e-26	8.48074e-25	50.1715
ENSG00000273045	C2orf15	150590	Q8WU43	ENSG00000273045_C2orf15	-2.17971	1.35748	-21.2941	1.42104e-26	8.52037e-25	50.1972
ENSG00000244405	ETV5	2119	P41161	ENSG00000244405_ETV5	1.69851	5.4894	21.2751	1.47889e-26	8.82867e-25	50.1764
ENSG00000185222	TCEAL9	51186	Q9UHQ7	ENSG00000185222_TCEAL9	1.32104	5.06197	21.2739	1.48265e-26	8.82867e-25	50.2168
ENSG00000188559	RALGAPA2	57186	H7C1F9	ENSG00000188559_RALGAPA2	-1.289	5.95599	-21.2227	1.65122e-26	9.79874e-25	50.015
ENSG00000111252	SH2B3	10019	Q9UQQ2	ENSG00000111252_SH2B3	1.75136	5.47841	21.1983	1.73837e-26	1.02807e-24	50.0091
ENSG00000186517	ARHGAP30	257106	NA	ENSG00000186517_ARHGAP30	-5.07367	-0.452947	-21.1827	1.79644e-26	1.0588e-24	49.2137
ENSG00000119280	C1orf198	84886	Q9H425	ENSG00000119280_C1orf198	-1.41783	4.98546	-21.1801	1.80624e-26	1.06097e-24	50.0137
ENSG00000212864	RNF208	727800	Q9H0X6	ENSG00000212864_RNF208	-3.35133	0.923494	-21.1451	1.94484e-26	1.13852e-24	49.7034
ENSG00000064601	CTSA	5476	NA	ENSG00000064601_CTSA	-1.26912	6.50098	-21.134	1.99074e-26	1.16146e-24	49.7924
ENSG00000129194	SOX15	6665	O60248	ENSG00000129194_SOX15	3.19452	4.6924	21.1312	2.00253e-26	1.16442e-24	50.0107
ENSG00000183943	PRKX	5613	P51817	ENSG00000183943_PRKX	-1.10907	6.1183	-21.1248	2.03015e-26	1.17653e-24	49.7904
ENSG00000069020	MAST4	375449	J3QT34	ENSG00000069020_MAST4	1.77162	6.7218	21.1102	2.09347e-26	1.20919e-24	49.7322
ENSG00000272079	LA16c-380H5.5	107984895	NA	ENSG00000272079_LA16c-380H5.5	-4.91278	0.179542	-21.0945	2.16441e-26	1.24601e-24	49.2055
ENSG00000171462	DLK2	65989	H0Y5P1	ENSG00000171462_DLK2	4.68056	3.27877	21.0686	2.28638e-26	1.31186e-24	49.8702
ENSG00000130545	CRB3	92359	Q9BUF7	ENSG00000130545_CRB3	-1.45446	3.6287	-21.0608	2.32435e-26	1.32925e-24	49.8699
ENSG00000125735	TNFSF14	8740	O43557	ENSG00000125735_TNFSF14	-7.7302	-0.762987	-21.0554	2.35104e-26	1.34009e-24	48.3605
ENSG00000196187	TMEM63A	9725	O94886	ENSG00000196187_TMEM63A	-1.99662	6.0623	-21.0486	2.38544e-26	1.35524e-24	49.6363
ENSG00000111424	VDR	7421	P11473	ENSG00000111424_VDR	1.14889	6.9754	21.0097	2.59056e-26	1.46697e-24	49.4969
ENSG00000167996	FTH1	2495	E9PK45	ENSG00000167996_FTH1	-2.48987	9.71918	-21.0006	2.64087e-26	1.49059e-24	49.4332
ENSG00000163629	PTPN13	5783	Q12923	ENSG00000163629_PTPN13	3.07712	6.71451	20.9874	2.71643e-26	1.52826e-24	49.5057
ENSG00000183853	KIRREL	55243	Q5W0F9	ENSG00000183853_KIRREL	1.99831	7.36458	20.9814	2.75121e-26	1.54281e-24	49.4289
ENSG00000138642	HERC6	55008	Q8IVU3	ENSG00000138642_HERC6	-1.78779	4.90779	-20.9701	2.8177e-26	1.575e-24	49.5913
ENSG00000006740	ARHGAP44	9912	Q17R89	ENSG00000006740_ARHGAP44	-4.65497	1.39165	-20.9676	2.83316e-26	1.57855e-24	49.2833
ENSG00000105329	TGFB1	7040	M0R2S0	ENSG00000105329_TGFB1	2.40117	5.77233	20.9643	2.85285e-26	1.57937e-24	49.5047
ENSG00000109586	GALNT7	51809	Q86SF2	ENSG00000109586_GALNT7	-1.35503	6.62747	-20.9654	2.84605e-26	1.57937e-24	49.4176
ENSG00000221926	TRIM16	10626	O95361	ENSG00000221926_TRIM16	-2.10873	4.87032	-20.9585	2.88853e-26	1.59403e-24	49.569
ENSG00000118263	KLF7	8609	O75840	ENSG00000118263_KLF7	1.93096	7.29956	20.9291	3.07457e-26	1.69131e-24	49.315
ENSG00000169026	MFSD7	84179	NA	ENSG00000169026_MFSD7	-4.67071	0.638031	-20.9169	3.15543e-26	1.73029e-24	48.9651
ENSG00000130768	SMPDL3B	27293	Q92485	ENSG00000130768_SMPDL3B	-2.23662	4.35732	-20.9044	3.24082e-26	1.77151e-24	49.5171
ENSG00000145335	SNCA	6622	P37840	ENSG00000145335_SNCA	4.74407	3.15996	20.9002	3.26985e-26	1.78057e-24	49.5104
ENSG00000256268	RP11-221N13.3	NA	NA	ENSG00000256268_RP11-221N13.3	3.22504	0.491645	20.8991	3.27795e-26	1.78057e-24	49.0745
ENSG00000175906	ARL4D	379	P49703	ENSG00000175906_ARL4D	2.0951	4.57895	20.8826	3.39543e-26	1.83863e-24	49.446
ENSG00000163689	C3orf67	200844	H0Y8H3	ENSG00000163689_C3orf67	2.11345	2.79497	20.8781	3.42824e-26	1.85061e-24	49.5062
ENSG00000176485	PLA2G16	11145	P53816	ENSG00000176485_PLA2G16	-5.09603	4.42093	-20.8727	3.46747e-26	1.86597e-24	49.4962
ENSG00000177666	PNPLA2	57104	Q96AD5	ENSG00000177666_PNPLA2	-1.65137	5.41731	-20.8659	3.51858e-26	1.88761e-24	49.29
ENSG00000131149	GSE1	23199	NA	ENSG00000131149_GSE1	-1.32781	5.96911	-20.8323	3.78034e-26	2.02178e-24	49.171
ENSG00000109738	GLRB	2743	P48167	ENSG00000109738_GLRB	-1.60146	3.25038	-20.8265	3.82763e-26	2.04077e-24	49.3888
ENSG00000149557	FEZ1	9638	NA	ENSG00000149557_FEZ1	4.65607	4.62964	20.8083	3.97889e-26	2.10845e-24	49.3464
ENSG00000163219	ARHGAP25	9938	B7Z8K7	ENSG00000163219_ARHGAP25	4.57922	3.40006	20.7879	4.15672e-26	2.19596e-24	49.2959
ENSG00000173905	GOLIM4	27333	O00461	ENSG00000173905_GOLIM4	1.22347	6.23963	20.7739	4.28306e-26	2.25583e-24	49.0346
ENSG00000226742	HSBP1L1	440498	C9JCN9	ENSG00000226742_HSBP1L1	-1.0766	4.98685	-20.7718	4.30238e-26	2.25914e-24	49.1102
ENSG00000262160	RP11-96D1.11	NA	NA	ENSG00000262160_RP11-96D1.11	-1.02843	4.34473	-20.7134	4.87743e-26	2.55335e-24	49.0518
ENSG00000148488	ST8SIA6	338596	H0Y405	ENSG00000148488_ST8SIA6	-5.9694	-1.34139	-20.6839	5.19564e-26	2.71175e-24	47.8011
ENSG00000165591	FAAH2	158584	Q6GMR7	ENSG00000165591_FAAH2	-3.95828	-0.0518576	-20.6807	5.2315e-26	2.72227e-24	48.3432
ENSG00000169435	RASSF6	166824	Q6ZTQ3	ENSG00000169435_RASSF6	2.76404	4.68662	20.6584	5.48861e-26	2.8475e-24	48.9663
ENSG00000166394	CYB5R2	51700	Q6BCY4	ENSG00000166394_CYB5R2	-3.44193	5.10586	-20.648	5.61315e-26	2.90342e-24	48.9361
ENSG00000001617	SEMA3F	6405	C9J1V2	ENSG00000001617_SEMA3F	1.68454	7.00849	20.6415	5.69263e-26	2.93577e-24	48.7075
ENSG00000197892	KIF13B	23303	Q9NQT8	ENSG00000197892_KIF13B	-1.69527	5.51341	-20.632	5.80994e-26	2.98738e-24	48.7993
ENSG00000185000	DGAT1	102465511	O75907	ENSG00000185000_DGAT1	-1.03921	4.4751	-20.5905	6.3533e-26	3.24749e-24	48.7793
ENSG00000188732	FAM221A	340277	A4D161	ENSG00000188732_FAM221A	-4.14164	0.537847	-20.578	6.52774e-26	3.32684e-24	48.3988
ENSG00000186847	KRT14	3861	P02533	ENSG00000186847_KRT14	3.13579	11.3671	20.5683	6.66508e-26	3.38688e-24	48.4978
ENSG00000214655	ZSWIM8	23053	S4R410	ENSG00000214655_ZSWIM8	-1.07265	6.66491	-20.5509	6.92031e-26	3.50629e-24	48.5065
ENSG00000253348	CTC-455F18.1	NA	NA	ENSG00000253348_CTC-455F18.1	-5.24398	-2.32445	-20.5469	6.98112e-26	3.52679e-24	47.1771
ENSG00000079257	LXN	56925	H7C5A4	ENSG00000079257_LXN	-3.08629	4.87963	-20.5438	7.02791e-26	3.5401e-24	48.7126
ENSG00000141527	CARD14	79092	I3L4Q8	ENSG00000141527_CARD14	-5.16424	0.856581	-20.5393	7.09683e-26	3.55416e-24	48.1963
ENSG00000260244	RP11-588K22.2	NA	NA	ENSG00000260244_RP11-588K22.2	-6.0282	2.59895	-20.5402	7.08265e-26	3.55416e-24	48.5603
ENSG00000115457	IGFBP2	3485	C9JW52	ENSG00000115457_IGFBP2	3.78228	6.98322	20.5313	7.22073e-26	3.60579e-24	48.5347
ENSG00000099282	TSPAN15	23555	O95858	ENSG00000099282_TSPAN15	-4.59145	2.51223	-20.5091	7.57613e-26	3.77239e-24	48.5864
ENSG00000196083	IL1RAP	3556	Q9NPH3	ENSG00000196083_IL1RAP	1.67281	7.34188	20.4934	7.83768e-26	3.89144e-24	48.3651
ENSG00000076685	NT5C2	22978	P49902	ENSG00000076685_NT5C2	-1.24579	6.76527	-20.4477	8.65426e-26	4.2724e-24	48.2832
ENSG00000172345	STARD5	80765	Q9NSY2	ENSG00000172345_STARD5	2.24205	2.79521	20.4385	8.8282e-26	4.34588e-24	48.5629
ENSG00000142235	LMTK3	114783	Q96Q04	ENSG00000142235_LMTK3	-2.2996	3.87669	-20.4201	9.18901e-26	4.51069e-24	48.4977
ENSG00000131620	ANO1	55107	Q5XXA6	ENSG00000131620_ANO1	3.96395	6.32257	20.4179	9.23231e-26	4.51914e-24	48.3413
ENSG00000007062	PROM1	8842	H0Y9D4	ENSG00000007062_PROM1	-7.33224	4.93924	-20.3912	9.78476e-26	4.77606e-24	48.4545
ENSG00000136854	STXBP1	6812	NA	ENSG00000136854_STXBP1	1.24563	5.85751	20.3896	9.81691e-26	4.7783e-24	48.218
ENSG00000166250	CLMP	79827	Q9H6B4	ENSG00000166250_CLMP	2.38593	6.70132	20.3621	1.04225e-25	5.05885e-24	48.1253
ENSG00000067992	PDK3	5165	Q15120	ENSG00000067992_PDK3	-3.53695	3.35216	-20.3589	1.04951e-25	5.07987e-24	48.3913
ENSG00000181458	TMEM45A	55076	Q9NWC5	ENSG00000181458_TMEM45A	-3.22178	6.35403	-20.3489	1.07272e-25	5.17775e-24	48.1564
ENSG00000196739	COL27A1	85301	Q8IZC6	ENSG00000196739_COL27A1	3.34378	3.91354	20.3316	1.11393e-25	5.36171e-24	48.305
ENSG00000111057	KRT18	3875	F8VZY9	ENSG00000111057_KRT18	-2.412	7.9284	-20.2902	1.21909e-25	5.85162e-24	47.9029
ENSG00000141497	ZMYND15	84225	Q9H091	ENSG00000141497_ZMYND15	-3.59403	0.320267	-20.2787	1.25029e-25	5.98483e-24	47.8096
ENSG00000140022	STON2	85439	Q8WXE9	ENSG00000140022_STON2	2.03322	5.39452	20.2559	1.3141e-25	6.23854e-24	47.9887
ENSG00000132357	CARD6	84674	Q9BX69	ENSG00000132357_CARD6	-3.53818	3.89957	-20.2561	1.3135e-25	6.23854e-24	48.1674
ENSG00000182667	NTM	50863	Q9P121	ENSG00000182667_NTM	4.32139	3.30327	20.2489	1.33425e-25	6.31693e-24	48.1435
ENSG00000138061	CYP1B1	1545	NA	ENSG00000138061_CYP1B1	-5.50661	6.23505	-20.2462	1.34234e-25	6.33788e-24	48.018
ENSG00000074964	ARHGEF10L	55160	Q9HCE6	ENSG00000074964_ARHGEF10L	-4.79078	3.13171	-20.2292	1.39292e-25	6.54107e-24	48.0748
ENSG00000100284	TOM1	10043	V9GYF4	ENSG00000100284_TOM1	-1.56071	4.34745	-20.2223	1.41422e-25	6.62314e-24	48.0024
ENSG00000105327	BBC3	100422832	NA	ENSG00000105327_BBC3	-2.273	2.02344	-20.2159	1.43417e-25	6.69845e-24	48.0494
ENSG00000165105	RASEF	158158	Q8IZ41	ENSG00000165105_RASEF	-3.05837	3.8473	-20.2138	1.44092e-25	6.71192e-24	48.058
ENSG00000118855	MFSD1	64747	C9JBA3	ENSG00000118855_MFSD1	-1.30138	6.36294	-20.2071	1.46208e-25	6.7922e-24	47.7766
ENSG00000070961	ATP2B1	490	P20020	ENSG00000070961_ATP2B1	1.6259	7.31012	20.1935	1.50626e-25	6.9416e-24	47.7069
ENSG00000107249	GLIS3	169792	Q8NEA6	ENSG00000107249_GLIS3	-3.66084	3.38208	-20.1939	1.50491e-25	6.9416e-24	48.0351
ENSG00000128833	MYO5C	55930	Q9NQX4	ENSG00000128833_MYO5C	-4.18642	5.193	-20.1944	1.50329e-25	6.9416e-24	47.9747
ENSG00000100154	TTC28	23331	Q96AY4	ENSG00000100154_TTC28	3.54579	2.3278	20.1901	1.51753e-25	6.97502e-24	47.9518
ENSG00000162069	BICDL2	146439	NA	ENSG00000162069_BICDL2	-6.04356	3.08548	-20.1859	1.53165e-25	7.00277e-24	47.8971
ENSG00000088002	SULT2B1	6820	O00204	ENSG00000088002_SULT2B1	-5.0506	1.91209	-20.1828	1.54192e-25	7.0127e-24	47.6878
ENSG00000171517	LPAR3	23566	Q9UBY5	ENSG00000171517_LPAR3	4.26264	4.50125	20.158	1.62815e-25	7.38548e-24	47.9436
ENSG00000243364	EFNA4	1945	P52798	ENSG00000243364_EFNA4	-1.41842	3.40674	-20.1519	1.65004e-25	7.46526e-24	47.9276
ENSG00000078114	NEBL	10529	O76041	ENSG00000078114_NEBL	-4.38907	5.80293	-20.1439	1.67926e-25	7.57765e-24	47.8102
ENSG00000153721	CNKSR3	154043	Q6P9H4	ENSG00000153721_CNKSR3	-2.05433	3.83827	-20.1398	1.69464e-25	7.6272e-24	47.8848
ENSG00000049130	KITLG	4254	NA	ENSG00000049130_KITLG	2.14365	5.8949	20.1337	1.7175e-25	7.71005e-24	47.6717
ENSG00000183255	PTTG1IP	754	A8MZH8	ENSG00000183255_PTTG1IP	-1.80414	8.58051	-20.1276	1.74068e-25	7.79394e-24	47.5312
ENSG00000087916	NA	NA	NA	ENSG00000087916_NA	-8.36809	5.19128	-20.1156	1.78703e-25	7.98082e-24	47.8223
ENSG00000152022	NA	NA	NA	ENSG00000152022_NA	1.5357	4.77857	20.1114	1.80359e-25	8.03407e-24	47.7194
ENSG00000158315	RHBDL2	54933	Q9NX52	ENSG00000158315_RHBDL2	-2.2835	3.71418	-20.104	1.83323e-25	8.12433e-24	47.8218
ENSG00000089486	CDIP1	29965	Q9H305	ENSG00000089486_CDIP1	2.8142	4.92422	20.1018	1.84224e-25	8.14347e-24	47.743
ENSG00000272825	LL21NC02-1C16.2	NA	NA	ENSG00000272825_LL21NC02-1C16.2	-5.89872	-0.465606	-20.079	1.93685e-25	8.53988e-24	46.8817
ENSG00000248362	CTC-327F10.5	NA	NA	ENSG00000248362_CTC-327F10.5	-4.03127	-3.08773	-20.0704	1.97391e-25	8.6812e-24	46.2554
ENSG00000187554	TLR5	7100	O60602	ENSG00000187554_TLR5	-3.66067	2.70622	-20.0558	2.03833e-25	8.94183e-24	47.6966
ENSG00000151150	ANK3	288	Q12955	ENSG00000151150_ANK3	-2.43552	5.91257	-20.054	2.04642e-25	8.95465e-24	47.5185
ENSG00000077454	LRCH4	4034	H7C5D9	ENSG00000077454_LRCH4	-1.26251	5.24436	-20.0344	2.13707e-25	9.30432e-24	47.4591
ENSG00000166710	B2M	567	P61769	ENSG00000166710_B2M	-1.36694	9.14024	-20.0192	2.20966e-25	9.57723e-24	47.2797
ENSG00000197119	SLC25A29	123096	Q8N8R3	ENSG00000197119_SLC25A29	-2.01497	4.65453	-20.019	2.21081e-25	9.57723e-24	47.5118
ENSG00000131746	TNS4	84951	NA	ENSG00000131746_TNS4	2.19345	9.59162	19.9854	2.38111e-25	1.02892e-23	47.2038
ENSG00000168447	SCNN1B	6338	NA	ENSG00000168447_SCNN1B	-7.7343	2.01942	-19.9703	2.46175e-25	1.06112e-23	46.7603
ENSG00000197122	SRC	6714	NA	ENSG00000197122_SRC	1.08924	6.54042	19.9674	2.47737e-25	1.06521e-23	47.2302
ENSG00000139083	ETV6	2120	P41212	ENSG00000139083_ETV6	-1.26852	6.40521	-19.949	2.58064e-25	1.10687e-23	47.1964
ENSG00000162493	PDPN	10630	Q86YL7	ENSG00000162493_PDPN	5.09849	3.1392	19.9249	2.72199e-25	1.16254e-23	47.4028
ENSG00000198721	ECI2	10455	O75521	ENSG00000198721_ECI2	1.0816	6.04706	19.9241	2.72696e-25	1.16254e-23	47.1654
ENSG00000204323	SMIM5	643008	Q71RC9	ENSG00000204323_SMIM5	-6.11765	-1.79279	-19.9235	2.73057e-25	1.16254e-23	46.1619
ENSG00000150782	IL18	3606	Q14116	ENSG00000150782_IL18	-4.41965	4.11586	-19.9086	2.82176e-25	1.19842e-23	47.4051
ENSG00000187244	BCAM	4059	A0A087WXM8	ENSG00000187244_BCAM	3.21435	6.44263	19.8975	2.89201e-25	1.22525e-23	47.138
ENSG00000106571	GLI3	2737	P10071	ENSG00000106571_GLI3	2.47795	4.93707	19.8808	3.001e-25	1.26832e-23	47.2226
ENSG00000163577	EIF5A2	56648	Q9GZV4	ENSG00000163577_EIF5A2	1.70306	3.91868	19.8761	3.03241e-25	1.27848e-23	47.2683
ENSG00000089327	FXYD5	53827	A8MVG1	ENSG00000089327_FXYD5	-1.22382	7.54222	-19.8682	3.08652e-25	1.29813e-23	46.9645
ENSG00000113494	PRLR	5618	P16471	ENSG00000113494_PRLR	-7.61795	-0.927339	-19.8541	3.1842e-25	1.33598e-23	45.9975
ENSG00000112299	VNN1	8876	O95497	ENSG00000112299_VNN1	-6.47446	0.984338	-19.8206	3.4309e-25	1.43601e-23	46.5289
ENSG00000198948	MFAP3L	9848	O75121	ENSG00000198948_MFAP3L	-1.70202	4.00379	-19.8192	3.44095e-25	1.43674e-23	47.1446
ENSG00000077238	IL4R	3566	J9JII2	ENSG00000077238_IL4R	1.4151	6.85201	19.8135	3.4848e-25	1.45155e-23	46.8722
ENSG00000248846	CTD-2016O11.1	NA	NA	ENSG00000248846_CTD-2016O11.1	-4.33655	-2.37257	-19.8089	3.52135e-25	1.46326e-23	45.8393
ENSG00000084207	GSTP1	2950	P09211	ENSG00000084207_GSTP1	1.19901	9.24173	19.7963	3.62082e-25	1.501e-23	46.779
ENSG00000176014	TUBB6	84617	K7EL29	ENSG00000176014_TUBB6	1.24528	8.92284	19.7872	3.69528e-25	1.5282e-23	46.7608
ENSG00000164171	ITGA2	3673	P17301	ENSG00000164171_ITGA2	2.11474	8.29371	19.7436	4.07208e-25	1.67615e-23	46.6779
ENSG00000127955	GNAI1	2770	C9J2Z2	ENSG00000127955_GNAI1	1.34243	5.21044	19.7436	4.07237e-25	1.67615e-23	46.8417
ENSG00000100739	BDKRB1	623	P46663	ENSG00000100739_BDKRB1	5.53508	-0.971589	19.7291	4.20599e-25	1.72705e-23	46.0001
ENSG00000138411	HECW2	57520	Q9P2P5	ENSG00000138411_HECW2	-6.75083	1.77643	-19.7274	4.22224e-25	1.72962e-23	46.4893
ENSG00000101187	SLCO4A1	28231	E1P5H9	ENSG00000101187_SLCO4A1	-4.56176	1.65867	-19.6943	4.5459e-25	1.85781e-23	46.6942
ENSG00000108479	GALK1	2584	P51570	ENSG00000108479_GALK1	-2.59523	2.39515	-19.6673	4.82876e-25	1.96415e-23	46.8656
ENSG00000183111	ARHGEF37	389337	D6RJH4	ENSG00000183111_ARHGEF37	-1.88358	5.38941	-19.6552	4.96084e-25	2.01315e-23	46.6486
ENSG00000183742	MACC1	346389	Q6ZN28	ENSG00000183742_MACC1	-5.65688	5.06153	-19.6333	5.21038e-25	2.10456e-23	46.791
ENSG00000176845	METRNL	284207	Q641Q3	ENSG00000176845_METRNL	-3.71051	2.07774	-19.6283	5.26977e-25	2.12359e-23	46.7277
ENSG00000122515	ZMIZ2	83637	Q8NF64	ENSG00000122515_ZMIZ2	-1.21479	6.23471	-19.5922	5.71323e-25	2.29696e-23	46.388
ENSG00000165804	ZNF219	51222	Q9P2Y4	ENSG00000165804_ZNF219	2.08275	5.07548	19.581	5.85941e-25	2.35027e-23	46.515
ENSG00000144048	DUSP11	8446	O75319	ENSG00000144048_DUSP11	1.05924	5.46491	19.5743	5.94741e-25	2.38006e-23	46.4216
ENSG00000149257	SERPINH1	871	P50454	ENSG00000149257_SERPINH1	1.30496	7.64266	19.5584	6.16451e-25	2.4556e-23	46.2685
ENSG00000154511	FAM69A	388650	Q5T7M9	ENSG00000154511_FAM69A	2.45286	4.40567	19.5473	6.31972e-25	2.51165e-23	46.5262
ENSG00000178363	CALML3	810	P27482	ENSG00000178363_CALML3	4.67895	7.01235	19.5314	6.54997e-25	2.5972e-23	46.3359
ENSG00000225485	NA	NA	NA	ENSG00000225485_NA	2.3211	5.3761	19.4823	7.31593e-25	2.8943e-23	46.2701
ENSG00000130517	PGPEP1	54858	Q9NXJ5	ENSG00000130517_PGPEP1	-1.89552	4.27806	-19.4736	7.46039e-25	2.94473e-23	46.3644
ENSG00000141258	SGSM2	9905	I3L1Y7	ENSG00000141258_SGSM2	-1.59568	5.60183	-19.4713	7.4981e-25	2.95289e-23	46.1652
ENSG00000158089	GALNT14	79623	Q96FL9	ENSG00000158089_GALNT14	1.63505	5.26654	19.4506	7.85803e-25	3.08063e-23	46.1816
ENSG00000123352	SPATS2	65244	F8VXB3	ENSG00000123352_SPATS2	1.06924	5.67073	19.4514	7.84369e-25	3.08063e-23	46.1316
ENSG00000069188	SDK2	54549	Q58EX2	ENSG00000069188_SDK2	4.96572	3.76179	19.4155	8.50497e-25	3.32673e-23	46.3114
ENSG00000091436	AC013461.1	51776	Q9NYL2	ENSG00000091436_AC013461.1	1.69602	7.70345	19.4109	8.59358e-25	3.35382e-23	45.9305
ENSG00000160796	NBEAL2	23218	Q6ZNJ1	ENSG00000160796_NBEAL2	-1.43402	6.95179	-19.3912	8.98552e-25	3.49106e-23	45.8996
ENSG00000137843	PAK6	106821730	H0YM99	ENSG00000137843_PAK6	1.53865	3.65399	19.3873	9.06524e-25	3.51415e-23	46.2104
ENSG00000196743	GM2A	2760	E5RJD0	ENSG00000196743_GM2A	1.92585	7.10703	19.3775	9.26933e-25	3.58524e-23	45.8901
ENSG00000102996	MMP15	4324	P51511	ENSG00000102996_MMP15	-1.71693	4.38514	-19.3715	9.3945e-25	3.62557e-23	46.1064
ENSG00000169282	KCNAB1	7881	NA	ENSG00000169282_KCNAB1	-5.53169	-1.53876	-19.3703	9.4206e-25	3.62756e-23	45.0697
ENSG00000159640	ACE	1636	NA	ENSG00000159640_ACE	-3.7248	2.77571	-19.3678	9.4736e-25	3.63183e-23	46.1821
ENSG00000260822	GS1-358P8.4	NA	NA	ENSG00000260822_GS1-358P8.4	-3.95771	3.13518	-19.3684	9.46217e-25	3.63183e-23	46.1983
ENSG00000196730	DAPK1	1612	P53355	ENSG00000196730_DAPK1	-5.17432	4.01688	-19.3667	9.49673e-25	3.63266e-23	46.1999
ENSG00000153113	CAST	831	NA	ENSG00000153113_CAST	-1.8981	10.1127	-19.3566	9.71814e-25	3.70916e-23	45.778
ENSG00000119431	HDHD3	81932	Q9BSH5	ENSG00000119431_HDHD3	-1.1637	3.98774	-19.3547	9.75965e-25	3.71682e-23	46.0713
ENSG00000172548	NIPAL4	348938	Q0D2K0	ENSG00000172548_NIPAL4	4.32676	4.20975	19.3402	1.00842e-24	3.83198e-23	46.135
ENSG00000104447	TRPS1	7227	Q9UHF7	ENSG00000104447_TRPS1	-1.5048	6.78604	-19.3346	1.0214e-24	3.87283e-23	45.7883
ENSG00000061918	GUCY1B3	2983	B7Z685	ENSG00000061918_GUCY1B3	-3.37424	3.16818	-19.2972	1.11194e-24	4.20379e-23	46.0446
ENSG00000105523	FAM83E	54854	Q2M2I3	ENSG00000105523_FAM83E	-5.27054	0.0425397	-19.2965	1.11354e-24	4.20379e-23	45.4037
ENSG00000101680	LAMA1	284217	P25391	ENSG00000101680_LAMA1	4.99048	4.8502	19.2741	1.17181e-24	4.41416e-23	45.9541
ENSG00000119899	SLC17A5	26503	Q9NRA2	ENSG00000119899_SLC17A5	-1.496	4.88994	-19.2678	1.18852e-24	4.46739e-23	45.8123
ENSG00000185963	BICD2	23299	Q8TD16	ENSG00000185963_BICD2	1.06864	7.19911	19.2635	1.20021e-24	4.50156e-23	45.6039
ENSG00000154556	SORBS2	8470	O94875	ENSG00000154556_SORBS2	-6.75384	3.32189	-19.2414	1.26226e-24	4.72408e-23	45.8295
ENSG00000105289	TJP3	27134	O95049	ENSG00000105289_TJP3	-7.79967	1.32499	-19.2386	1.27021e-24	4.74359e-23	45.1821
ENSG00000178750	STX19	415117	Q8N4C7	ENSG00000178750_STX19	-6.02483	-1.46446	-19.2311	1.29201e-24	4.8146e-23	44.7923
ENSG00000148680	HTR7	3363	P34969	ENSG00000148680_HTR7	3.21702	3.96683	19.1718	1.47887e-24	5.49909e-23	45.7286
ENSG00000177685	CRACR2B	283229	E9PRE5	ENSG00000177685_CRACR2B	-4.07589	1.97338	-19.1437	1.5769e-24	5.85109e-23	45.6219
ENSG00000140945	CDH13	1012	P55290	ENSG00000140945_CDH13	3.08911	5.97702	19.138	1.59769e-24	5.91554e-23	45.4821
ENSG00000019485	PRDM11	56981	Q9NQV5	ENSG00000019485_PRDM11	2.11589	1.38577	19.122	1.65709e-24	6.12239e-23	45.5661
ENSG00000108244	KRT23	25984	Q9C075	ENSG00000108244_KRT23	-6.51854	5.11924	-19.1191	1.6682e-24	6.15032e-23	45.6296
ENSG00000154065	ANKRD29	147463	Q8N6D5	ENSG00000154065_ANKRD29	3.71942	2.41421	19.1006	1.74027e-24	6.38008e-23	45.557
ENSG00000112079	STK38	11329	Q15208	ENSG00000112079_STK38	-1.07404	6.74114	-19.1007	1.7399e-24	6.38008e-23	45.2454
ENSG00000026297	RNASET2	8635	D6REQ6	ENSG00000026297_RNASET2	-1.61541	3.5631	-19.1003	1.74156e-24	6.38008e-23	45.5516
ENSG00000128656	CHN1	1123	P15882	ENSG00000128656_CHN1	-1.92927	4.39492	-19.0986	1.74831e-24	6.39131e-23	45.4764
ENSG00000196576	PLXNB2	23654	NA	ENSG00000196576_PLXNB2	-1.16155	8.93049	-19.0855	1.80141e-24	6.57153e-23	45.1569
ENSG00000106799	TGFBR1	7046	F8VVC4	ENSG00000106799_TGFBR1	1.04192	6.08521	19.081	1.82021e-24	6.62619e-23	45.2356
ENSG00000172081	MOB3A	126308	Q96BX8	ENSG00000172081_MOB3A	1.24851	6.48377	19.0771	1.83656e-24	6.67167e-23	45.2068
ENSG00000172461	FUT9	10690	NA	ENSG00000172461_FUT9	-7.8686	-0.992463	-19.0717	1.85925e-24	6.73996e-23	44.3974
ENSG00000180739	S1PR5	53637	Q9H228	ENSG00000180739_S1PR5	4.19246	1.84638	19.0484	1.96112e-24	7.07966e-23	45.3165
ENSG00000166268	MYRFL	196446	Q96LU7	ENSG00000166268_MYRFL	-4.64041	-1.75266	-19.038	2.00846e-24	7.23548e-23	44.4871
ENSG00000180447	GAS1	2619	P54826	ENSG00000180447_GAS1	3.02859	1.73676	19.0219	2.08402e-24	7.4921e-23	45.3601
ENSG00000151617	EDNRA	1909	P25101	ENSG00000151617_EDNRA	4.50281	3.99402	19.0166	2.10957e-24	7.55261e-23	45.4028
ENSG00000133687	TMTC1	83857	Q8IUR5	ENSG00000133687_TMTC1	4.29044	6.70248	19.0167	2.10903e-24	7.55261e-23	45.1797
ENSG00000065618	COL17A1	100126326	Q9UMD9	ENSG00000065618_COL17A1	4.20289	9.04567	18.9918	2.23332e-24	7.97917e-23	44.9659
ENSG00000239713	APOBEC3G	60489	Q9HC16	ENSG00000239713_APOBEC3G	4.07864	3.42017	18.9845	2.27146e-24	8.09873e-23	45.3347
ENSG00000105131	EPHX3	79852	Q9H6B9	ENSG00000105131_EPHX3	-5.33585	-0.647378	-18.9801	2.29414e-24	8.16281e-23	44.6239
ENSG00000119326	CTNNAL1	8727	Q9UBT7	ENSG00000119326_CTNNAL1	2.05313	6.93593	18.9648	2.37642e-24	8.43823e-23	44.9285
ENSG00000051523	CYBA	1535	P13498	ENSG00000051523_CYBA	-1.47843	6.46541	-18.9569	2.42008e-24	8.57564e-23	44.93
ENSG00000163131	CTSS	1520	P25774	ENSG00000163131_CTSS	-4.87898	2.23719	-18.956	2.42501e-24	8.57564e-23	45.1264
ENSG00000188277	C15orf62	643338	A8K5M9	ENSG00000188277_C15orf62	-5.80844	0.214099	-18.9374	2.53089e-24	8.93184e-23	44.6145
ENSG00000253250	C8orf88	100127983	P0DMB2	ENSG00000253250_C8orf88	4.77674	1.44235	18.9131	2.67689e-24	9.40242e-23	44.9333
ENSG00000145040	UCN2	90226	Q96RP3	ENSG00000145040_UCN2	3.48154	1.71904	18.9125	2.68051e-24	9.40242e-23	45.1145
ENSG00000227066	RP3-340N1.2	NA	NA	ENSG00000227066_RP3-340N1.2	-5.42271	-2.72401	-18.9136	2.6741e-24	9.40242e-23	43.8958
ENSG00000187231	SESTD1	91404	Q86VW0	ENSG00000187231_SESTD1	-1.10433	6.55115	-18.8822	2.87466e-24	1.0063e-22	44.7423
ENSG00000243927	MRPS6	64968	NA	ENSG00000243927_MRPS6	1.02329	5.33886	18.8811	2.88227e-24	1.00693e-22	44.8338
ENSG00000236699	ARHGEF38	54848	Q9NXL2	ENSG00000236699_ARHGEF38	-6.58083	0.0708764	-18.8772	2.90813e-24	1.01393e-22	44.34
ENSG00000109689	STIM2	57620	R4GN82	ENSG00000109689_STIM2	1.27996	5.50125	18.8755	2.91985e-24	1.01597e-22	44.8248
ENSG00000161091	MFSD12	126321	A0A087WU85	ENSG00000161091_MFSD12	-1.31613	6.88722	-18.8704	2.95384e-24	1.02573e-22	44.7018
ENSG00000136161	RCBTB2	1102	O95199	ENSG00000136161_RCBTB2	1.51699	3.05404	18.8665	2.98069e-24	1.03146e-22	45.0513
ENSG00000101457	DNTTIP1	116092	Q9H147	ENSG00000101457_DNTTIP1	-1.10825	5.44048	-18.8663	2.98223e-24	1.03146e-22	44.8039
ENSG00000003096	KLHL13	90293	A0A0C4DG99	ENSG00000003096_KLHL13	4.28892	3.83893	18.832	3.22826e-24	1.11433e-22	44.984
ENSG00000163453	IGFBP7	3490	NA	ENSG00000163453_IGFBP7	3.17325	5.66385	18.8048	3.43763e-24	1.18424e-22	44.723
ENSG00000147650	LRP12	29967	Q9Y561	ENSG00000147650_LRP12	1.2081	5.1889	18.7919	3.54233e-24	1.21547e-22	44.6659
ENSG00000186469	GNG2	54331	G3V3J9	ENSG00000186469_GNG2	3.56352	1.49989	18.7841	3.60713e-24	1.23527e-22	44.7649
ENSG00000203499	FAM83H-AS1	NA	NA	ENSG00000203499_FAM83H-AS1	-1.50863	5.13009	-18.772	3.70911e-24	1.26768e-22	44.6209
ENSG00000170542	SERPINB9	5272	P50453	ENSG00000170542_SERPINB9	-3.99685	2.50334	-18.7375	4.01849e-24	1.37072e-22	44.7555
ENSG00000064042	LIMCH1	22998	Q9UPQ0	ENSG00000064042_LIMCH1	-8.30084	3.1593	-18.7353	4.03931e-24	1.37511e-22	44.4396
ENSG00000095383	TBC1D2	55357	Q9BYX2	ENSG00000095383_TBC1D2	1.173	6.26058	18.7158	4.22662e-24	1.43606e-22	44.3771
ENSG00000133731	IMPA1	3612	P29218	ENSG00000133731_IMPA1	1.03256	4.48023	18.7149	4.2356e-24	1.43629e-22	44.5432
ENSG00000166145	SPINT1	6692	O43278	ENSG00000166145_SPINT1	-1.72175	8.48659	-18.7109	4.27475e-24	1.44674e-22	44.2891
ENSG00000166833	NAV2	89797	Q8IVL1	ENSG00000166833_NAV2	1.62017	5.79	18.7048	4.33524e-24	1.46435e-22	44.3847
ENSG00000166033	HTRA1	5654	Q92743	ENSG00000166033_HTRA1	4.68665	6.63655	18.6947	4.43889e-24	1.49644e-22	44.4391
ENSG00000072201	LNX1	84708	Q8TBB1	ENSG00000072201_LNX1	-4.42943	1.36903	-18.677	4.62523e-24	1.55623e-22	44.448
ENSG00000163347	CLDN1	9076	O95832	ENSG00000163347_CLDN1	-4.78181	5.18068	-18.6673	4.73055e-24	1.58858e-22	44.5361
ENSG00000117407	ARTN	9048	Q5T4W7	ENSG00000117407_ARTN	2.31384	4.48138	18.659	4.82372e-24	1.61051e-22	44.4309
ENSG00000185716	C16orf52	102725138	H3BS23	ENSG00000185716_C16orf52	1.06612	4.28953	18.6598	4.81456e-24	1.61051e-22	44.4314
ENSG00000072778	ACADVL	37	P49748	ENSG00000072778_ACADVL	-1.17468	8.25403	-18.6579	4.83624e-24	1.61158e-22	44.1628
ENSG00000145730	PAM	5066	D6RF09	ENSG00000145730_PAM	-1.39395	8.39324	-18.6489	4.93781e-24	1.64227e-22	44.1445
ENSG00000173918	C1QTNF1	114897	A0A0C4DFP7	ENSG00000173918_C1QTNF1	-2.5933	5.47263	-18.644	4.99457e-24	1.6577e-22	44.3325
ENSG00000253414	RP11-150O12.6	NA	NA	ENSG00000253414_RP11-150O12.6	-4.15027	-3.17295	-18.6433	5.00334e-24	1.6577e-22	43.12
ENSG00000005249	PRKAR2B	5577	P31323	ENSG00000005249_PRKAR2B	-6.37779	1.89538	-18.6352	5.09842e-24	1.68598e-22	44.2564
ENSG00000198719	DLL1	28514	O00548	ENSG00000198719_DLL1	3.60898	3.66274	18.6067	5.44882e-24	1.795e-22	44.4537
ENSG00000168060	NAALADL1	10004	H0YDS5	ENSG00000168060_NAALADL1	3.16931	0.770261	18.5919	5.64095e-24	1.85477e-22	44.1409
ENSG00000213722	DDAH2	23564	H0Y7N1	ENSG00000213722_DDAH2	-1.90595	3.80109	-18.5738	5.88427e-24	1.93111e-22	44.3218
ENSG00000166920	C15orf48	100126311	Q9C002	ENSG00000166920_C15orf48	-7.81487	2.17461	-18.5724	5.90384e-24	1.93387e-22	44.0187
ENSG00000272512	RP11-54O7.17	NA	NA	ENSG00000272512_RP11-54O7.17	-5.21127	-1.84144	-18.5619	6.0505e-24	1.97444e-22	43.504
ENSG00000100234	TIMP3	7078	P35625	ENSG00000100234_TIMP3	3.70252	7.64209	18.5498	6.22398e-24	2.02344e-22	43.9788
ENSG00000176978	DPP7	29952	Q9UHL4	ENSG00000176978_DPP7	-1.34556	5.45964	-18.5503	6.21629e-24	2.02344e-22	44.0577
ENSG00000144834	TAGLN3	29114	Q9UI15	ENSG00000144834_TAGLN3	3.23734	2.02067	18.5439	6.31012e-24	2.0476e-22	44.2806
ENSG00000090006	LTBP4	8425	A0A087X0A7	ENSG00000090006_LTBP4	1.43099	5.63962	18.5415	6.34617e-24	2.05545e-22	44.0102
ENSG00000101846	STS	412	P08842	ENSG00000101846_STS	-2.98679	4.40265	-18.5119	6.80134e-24	2.19876e-22	44.1536
ENSG00000109743	BST1	683	Q10588	ENSG00000109743_BST1	-3.40099	0.876029	-18.4942	7.08933e-24	2.28334e-22	44.0325
ENSG00000166347	CYB5A	1528	P00167	ENSG00000166347_CYB5A	-1.39974	5.48731	-18.4692	7.51724e-24	2.41668e-22	43.8633
ENSG00000149177	PTPRJ	5795	Q12913	ENSG00000149177_PTPRJ	-3.07345	3.22458	-18.4487	7.8874e-24	2.53098e-22	44.0821
ENSG00000213937	CLDN9	9080	O95484	ENSG00000213937_CLDN9	-5.19378	-2.49504	-18.4418	8.01673e-24	2.56772e-22	42.9497
ENSG00000130202	NECTIN2	5819	Q92692	ENSG00000130202_NECTIN2	-1.01209	6.41324	-18.434	8.16466e-24	2.61028e-22	43.7029
ENSG00000177694	NAALADL2	254827	NA	ENSG00000177694_NAALADL2	-6.10281	1.92871	-18.433	8.18415e-24	2.61169e-22	43.7895
ENSG00000185436	IFNLR1	163702	Q8IU57	ENSG00000185436_IFNLR1	1.80208	3.39648	18.432	8.20356e-24	2.61308e-22	44.0251
ENSG00000003249	DBNDD1	79007	Q9H9R9	ENSG00000003249_DBNDD1	-3.75337	3.52209	-18.4236	8.36664e-24	2.66013e-22	44.0257
ENSG00000123094	RASSF8	11228	Q8NHQ8	ENSG00000123094_RASSF8	1.65109	5.46606	18.4222	8.39552e-24	2.66442e-22	43.7604
ENSG00000196422	PPP1R26	9858	Q5T8A7	ENSG00000196422_PPP1R26	-1.29345	4.94111	-18.4093	8.65428e-24	2.74152e-22	43.7873
ENSG00000137821	LRRC49	54839	Q8IUZ0	ENSG00000137821_LRRC49	1.52787	2.88984	18.4063	8.71581e-24	2.75598e-22	43.9858
ENSG00000141179	PCTP	58488	Q9UKL6	ENSG00000141179_PCTP	-1.04435	5.19717	-18.3969	8.91073e-24	2.80227e-22	43.7217
ENSG00000078177	N4BP2	55728	Q86UW6	ENSG00000078177_N4BP2	1.70388	3.35155	18.3554	9.82621e-24	3.079e-22	43.8315
ENSG00000234456	MAGI2-AS3	100505881	NA	ENSG00000234456_MAGI2-AS3	4.92269	1.53793	18.326	1.05317e-23	3.29411e-22	43.6103
ENSG00000143515	ATP8B2	57198	P98198	ENSG00000143515_ATP8B2	4.08154	3.16982	18.3194	1.06953e-23	3.33923e-22	43.7921
ENSG00000232803	SLCO4A1-AS1	100127888	NA	ENSG00000232803_SLCO4A1-AS1	-5.43439	-2.32614	-18.3167	1.07643e-23	3.35475e-22	42.6653
ENSG00000088367	EPB41L1	2036	Q9H4G0	ENSG00000088367_EPB41L1	-2.0998	5.58271	-18.3091	1.09586e-23	3.40917e-22	43.5142
ENSG00000076356	PLXNA2	5362	O75051	ENSG00000076356_PLXNA2	2.31807	5.60676	18.3054	1.10568e-23	3.43357e-22	43.5093
ENSG00000141424	SLC39A6	25800	Q13433	ENSG00000141424_SLC39A6	1.19199	8.14913	18.2928	1.13895e-23	3.53054e-22	43.3015
ENSG00000187240	DYNC2H1	79659	Q8NCM8	ENSG00000187240_DYNC2H1	1.51003	5.96098	18.2526	1.25257e-23	3.8689e-22	43.3136
ENSG00000082458	DLG3	1741	Q5JUW8	ENSG00000082458_DLG3	-1.11647	5.53789	-18.2456	1.27365e-23	3.92702e-22	43.3365
ENSG00000164442	CITED2	10370	Q99967	ENSG00000164442_CITED2	-1.96706	5.92966	-18.2323	1.31427e-23	4.04507e-22	43.2612
ENSG00000106266	SNX8	102465503	Q9Y5X2	ENSG00000106266_SNX8	-1.40852	4.57036	-18.2288	1.32545e-23	4.07223e-22	43.3984
ENSG00000156413	FUT6	2528	P51993	ENSG00000156413_FUT6	-6.03128	-2.43645	-18.2211	1.34962e-23	4.12454e-22	42.4441
ENSG00000132182	NUP210	23225	Q8TEM1	ENSG00000132182_NUP210	-4.90099	4.22296	-18.2129	1.37625e-23	4.19853e-22	43.5329
ENSG00000011332	DPF1	8193	Q92782	ENSG00000011332_DPF1	2.41291	0.494604	18.2045	1.40399e-23	4.26812e-22	43.317
ENSG00000126561	STAT5A	6776	P42229	ENSG00000126561_STAT5A	-3.21368	2.70099	-18.2046	1.40369e-23	4.26812e-22	43.5226
ENSG00000181392	SYNE4	163183	NA	ENSG00000181392_SYNE4	-2.83493	2.07167	-18.1992	1.42177e-23	4.31463e-22	43.501
ENSG00000167693	NXN	64359	Q6DKJ4	ENSG00000167693_NXN	1.64102	6.77876	18.1886	1.45796e-23	4.41671e-22	43.1071
ENSG00000110080	ST3GAL4	6484	E9PKJ2	ENSG00000110080_ST3GAL4	-1.8579	6.02871	-18.1589	1.56472e-23	4.71537e-22	43.0893
ENSG00000160345	C9orf116	138162	Q5BN46	ENSG00000160345_C9orf116	-2.34364	1.04864	-18.1315	1.66991e-23	5.02364e-22	43.262
ENSG00000198467	TPM2	7169	Q5TCU8	ENSG00000198467_TPM2	2.05957	7.38146	18.1279	1.68425e-23	5.04054e-22	42.9384
ENSG00000054598	FOXC1	2296	Q12948	ENSG00000054598_FOXC1	-2.07336	6.21889	-18.1286	1.6815e-23	5.04054e-22	43.0112
ENSG00000110934	BIN2	51411	S4R418	ENSG00000110934_BIN2	-4.04563	-3.0397	-18.1146	1.73848e-23	5.19387e-22	42.0477
ENSG00000105357	MYH14	79784	Q7Z406	ENSG00000105357_MYH14	-8.51088	3.88758	-18.1098	1.75854e-23	5.24474e-22	43.1509
ENSG00000188211	NCR3LG1	374383	Q68D85	ENSG00000188211_NCR3LG1	2.53081	3.77208	18.0915	1.83681e-23	5.46877e-22	43.1952
ENSG00000060982	BCAT1	586	P54687	ENSG00000060982_BCAT1	3.40397	5.00756	18.0854	1.86362e-23	5.52959e-22	43.0566
ENSG00000183876	ARSI	340075	Q5FYB1	ENSG00000183876_ARSI	4.3412	4.24911	18.0535	2.01117e-23	5.95462e-22	43.1331
ENSG00000187601	MAGEH1	28986	Q9H213	ENSG00000187601_MAGEH1	2.76519	0.659044	18.0529	2.01374e-23	5.95462e-22	42.9589
ENSG00000174775	HRAS	3265	NA	ENSG00000174775_HRAS	1.16576	5.97163	18.0434	2.06015e-23	6.08148e-22	42.7983
ENSG00000005884	ITGA3	3675	D6R9X8	ENSG00000005884_ITGA3	1.34249	10.4596	18.0426	2.06435e-23	6.08352e-22	42.6804
ENSG00000112559	MDFI	4188	B1AKB8	ENSG00000112559_MDFI	1.24318	6.48277	18.0396	2.07874e-23	6.11553e-22	42.739
ENSG00000102362	SYTL4	94121	Q96C24	ENSG00000102362_SYTL4	-2.53284	3.12265	-18.0321	2.11668e-23	6.20607e-22	43.0979
ENSG00000048052	HDAC9	9734	Q9UKV0	ENSG00000048052_HDAC9	-5.11683	2.32197	-18.0137	2.21194e-23	6.4635e-22	43.0078
ENSG00000106537	TSPAN13	27075	O95857	ENSG00000106537_TSPAN13	-1.22284	5.74187	-17.9939	2.31899e-23	6.76488e-22	42.7067
ENSG00000004700	RECQL	5965	P46063	ENSG00000004700_RECQL	1.20629	6.4762	17.9925	2.32686e-23	6.77644e-22	42.637
ENSG00000261572	RP11-384L8.1	NA	NA	ENSG00000261572_RP11-384L8.1	-4.38059	-2.15876	-17.9886	2.34849e-23	6.82796e-22	42.1047
ENSG00000110888	CAPRIN2	65981	H0YGG3	ENSG00000110888_CAPRIN2	2.22131	4.57161	17.9851	2.36848e-23	6.87453e-22	42.8144
ENSG00000166689	PLEKHA7	144100	NA	ENSG00000166689_PLEKHA7	-2.86141	4.83507	-17.9496	2.57841e-23	7.44646e-22	42.7592
ENSG00000085831	TTC39A	22996	Q5SRH9	ENSG00000085831_TTC39A	-4.24453	0.675532	-17.9348	2.67157e-23	7.70267e-22	42.5928
ENSG00000119686	FLVCR2	55640	Q9UPI3	ENSG00000119686_FLVCR2	-4.58953	-0.020014	-17.9182	2.78069e-23	8.00395e-22	42.4514
ENSG00000175315	CST6	1474	Q15828	ENSG00000175315_CST6	-5.66066	3.08402	-17.9105	2.83233e-23	8.13907e-22	42.8041
ENSG00000135047	CTSL	1514	P07711	ENSG00000135047_CTSL	1.4365	5.8799	17.8895	2.97908e-23	8.54659e-22	42.4613
ENSG00000144136	SLC20A1	6574	Q8WUM9	ENSG00000144136_SLC20A1	1.92818	9.29051	17.885	3.01095e-23	8.62376e-22	42.3021
ENSG00000128567	PODXL	5420	G3V0E6	ENSG00000128567_PODXL	-5.50547	2.91423	-17.8342	3.40258e-23	9.68143e-22	42.6032
ENSG00000135116	HRK	8739	O00198	ENSG00000135116_HRK	-4.87347	0.763762	-17.829	3.446e-23	9.78889e-22	42.3404
ENSG00000117013	KCNQ4	9132	P56696	ENSG00000117013_KCNQ4	-4.25483	-0.965745	-17.8083	3.62201e-23	1.0272e-21	42.0735
ENSG00000169851	PCDH7	5099	O60245	ENSG00000169851_PCDH7	4.68496	3.83971	17.7833	3.8473e-23	1.084e-21	42.5185
ENSG00000129474	AJUBA	84962	Q96IF1	ENSG00000129474_AJUBA	1.33996	6.87025	17.7669	4.00269e-23	1.12413e-21	42.0657
ENSG00000062582	MRPS24	64951	Q96EL2	ENSG00000062582_MRPS24	-2.40124	0.392099	-17.7615	4.05491e-23	1.13695e-21	42.3645
ENSG00000128602	SMO	6608	Q99835	ENSG00000128602_SMO	1.69078	3.88397	17.737	4.30249e-23	1.20054e-21	42.3162
ENSG00000157827	FMNL2	114793	Q96PY5	ENSG00000157827_FMNL2	1.44825	6.91444	17.7359	4.31386e-23	1.20178e-21	41.9875
ENSG00000135111	TBX3	6926	O15119	ENSG00000135111_TBX3	2.16666	4.48334	17.7142	4.54661e-23	1.26458e-21	42.1865
ENSG00000166402	TUB	7275	E9PQR4	ENSG00000166402_TUB	3.44339	1.41865	17.7133	4.55703e-23	1.26545e-21	42.3009
ENSG00000034239	EFCAB1	79645	NA	ENSG00000034239_EFCAB1	4.74369	-0.876089	17.707	4.62723e-23	1.28084e-21	41.7864
ENSG00000083857	FAT1	2195	Q14517	ENSG00000083857_FAT1	1.48434	10.3851	17.7034	4.66725e-23	1.28986e-21	41.8543
ENSG00000160255	ITGB2	3689	NA	ENSG00000160255_ITGB2	-4.43137	3.18439	-17.6986	4.72232e-23	1.303e-21	42.3175
ENSG00000213190	MLLT11	10962	Q13015	ENSG00000213190_MLLT11	1.90549	5.33508	17.6937	4.77849e-23	1.31223e-21	42.0414
ENSG00000134827	TCN1	6947	NA	ENSG00000134827_TCN1	-6.23455	5.084	-17.694	4.77478e-23	1.31223e-21	42.2776
ENSG00000134901	KDELC1	79070	Q6UW63	ENSG00000134901_KDELC1	1.36929	3.74243	17.684	4.89234e-23	1.34137e-21	42.1916
ENSG00000154122	ANKH	56172	Q9HCJ1	ENSG00000154122_ANKH	1.32914	6.10303	17.6814	4.92249e-23	1.3475e-21	41.9228
ENSG00000155760	FZD7	8324	O75084	ENSG00000155760_FZD7	-1.96568	6.07253	-17.6793	4.94785e-23	1.35231e-21	41.9157
ENSG00000189127	ANKRD34B	340120	A5PLL1	ENSG00000189127_ANKRD34B	-4.20255	-2.83964	-17.6639	5.13651e-23	1.39946e-21	41.2437
ENSG00000164520	RAET1E	135250	Q8TD07	ENSG00000164520_RAET1E	3.07306	3.06878	17.6602	5.18293e-23	1.40989e-21	42.2242
ENSG00000234745	HLA-B	3106	NA	ENSG00000234745_HLA-B	-2.87579	6.99242	-17.6478	5.34058e-23	1.45049e-21	41.8034
ENSG00000176788	BASP1	10409	U3KQP0	ENSG00000176788_BASP1	2.35096	5.56485	17.6416	5.42232e-23	1.47039e-21	41.9175
ENSG00000063660	GPC1	2817	P35052	ENSG00000063660_GPC1	1.62909	7.47799	17.6218	5.68875e-23	1.54023e-21	41.6955
ENSG00000110911	SLC11A2	4891	H0YIV3	ENSG00000110911_SLC11A2	-1.56682	6.28295	-17.5854	6.21512e-23	1.68012e-21	41.666
ENSG00000182568	SATB1	6304	Q01826	ENSG00000182568_SATB1	-3.7565	2.54855	-17.5832	6.24861e-23	1.68654e-21	42.0368
ENSG00000005243	COPZ2	51226	NA	ENSG00000005243_COPZ2	2.5589	2.56769	17.5732	6.40368e-23	1.72558e-21	42.015
ENSG00000106605	BLVRA	644	P53004	ENSG00000106605_BLVRA	1.14267	4.94222	17.5604	6.60636e-23	1.77481e-21	41.7447
ENSG00000125845	BMP2	650	P12643	ENSG00000125845_BMP2	3.22385	3.74147	17.5454	6.85185e-23	1.83791e-21	41.8939
ENSG00000113396	SLC27A6	28965	D6RAJ2	ENSG00000113396_SLC27A6	4.87936	2.43636	17.5443	6.87043e-23	1.84004e-21	41.9373
ENSG00000184292	TACSTD2	4070	P09758	ENSG00000184292_TACSTD2	-1.84134	9.10098	-17.5431	6.89047e-23	1.84066e-21	41.4654
ENSG00000169908	TM4SF1	4071	P30408	ENSG00000169908_TM4SF1	-2.10185	8.20178	-17.5353	7.02252e-23	1.87209e-21	41.4624
ENSG00000196628	TCF4	6925	NA	ENSG00000196628_TCF4	2.82075	3.69197	17.5321	7.07753e-23	1.88386e-21	41.8623
ENSG00000183337	BCOR	54880	H7C2V9	ENSG00000183337_BCOR	1.19444	3.86606	17.5236	7.22514e-23	1.9202e-21	41.7922
ENSG00000173535	TNFRSF10C	8794	E9PBT0	ENSG00000173535_TNFRSF10C	-3.83709	1.51113	-17.5177	7.33123e-23	1.94541e-21	41.7757
ENSG00000117069	ST6GALNAC5	81849	Q9BVH7	ENSG00000117069_ST6GALNAC5	-4.35078	2.43671	-17.4988	7.67733e-23	2.03414e-21	41.8106
ENSG00000008196	TFAP2B	7021	X6R4Y8	ENSG00000008196_TFAP2B	5.13095	0.300185	17.4634	8.37127e-23	2.21124e-21	41.3882
ENSG00000106278	PTPRZ1	5803	P23471	ENSG00000106278_PTPRZ1	3.98223	5.08241	17.4537	8.57193e-23	2.2608e-21	41.5909
ENSG00000174567	GOLT1A	127845	Q6ZVE7	ENSG00000174567_GOLT1A	-4.19851	-0.895797	-17.4294	9.09671e-23	2.3883e-21	41.2005
ENSG00000266088	RP5-1028K7.2	NA	NA	ENSG00000266088_RP5-1028K7.2	2.38736	0.920746	17.4267	9.15821e-23	2.40081e-21	41.6015
ENSG00000124067	SLC12A4	6560	Q9UP95	ENSG00000124067_SLC12A4	1.15921	5.96223	17.426	9.17441e-23	2.40142e-21	41.2798
ENSG00000250742	RP11-834C11.4	400043	NA	ENSG00000250742_RP11-834C11.4	2.34833	3.02936	17.4201	9.30687e-23	2.43242e-21	41.6306
ENSG00000161955	TNFSF13	8741	K7EJ28	ENSG00000161955_TNFSF13	-2.23501	2.17801	-17.3934	9.9376e-23	2.59335e-21	41.5771
ENSG00000229852	RP11-398K22.12	NA	NA	ENSG00000229852_RP11-398K22.12	2.87741	1.43219	17.3785	1.03065e-22	2.68559e-21	41.4987
ENSG00000204264	PSMB8	5696	NA	ENSG00000204264_PSMB8	-1.38552	5.68402	-17.3763	1.03619e-22	2.69597e-21	41.1969
ENSG00000126821	SGPP1	81537	Q9BX95	ENSG00000126821_SGPP1	1.0809	4.92492	17.3722	1.04681e-22	2.71951e-21	41.2572
ENSG00000064886	CHI3L2	1117	Q15782	ENSG00000064886_CHI3L2	-5.63267	0.400408	-17.3656	1.06394e-22	2.75988e-21	41.09
ENSG00000166503	RP11-382A20.3	50810	H3BPM9	ENSG00000166503_RP11-382A20.3	1.33179	5.82089	17.3632	1.0702e-22	2.76782e-21	41.1515
ENSG00000182197	EXT1	2131	Q16394	ENSG00000182197_EXT1	1.06811	7.25013	17.3635	1.0693e-22	2.76782e-21	41.0576
ENSG00000183060	LYSMD4	145748	NA	ENSG00000183060_LYSMD4	1.10068	3.51416	17.3363	1.14339e-22	2.95271e-21	41.3451
ENSG00000149575	SCN2B	6327	O60939	ENSG00000149575_SCN2B	4.6552	-0.864048	17.3193	1.19219e-22	3.06968e-21	40.873
ENSG00000115648	MLPH	79083	C9JKV5	ENSG00000115648_MLPH	-4.50075	3.82457	-17.3193	1.19223e-22	3.06968e-21	41.3667
ENSG00000163032	VSNL1	7447	P62760	ENSG00000163032_VSNL1	2.50868	5.10467	17.3114	1.21563e-22	3.12528e-21	41.1665
ENSG00000169604	ANTXR1	84168	Q9H6X2	ENSG00000169604_ANTXR1	1.13861	6.4345	17.3022	1.2434e-22	3.19194e-21	40.9505
ENSG00000259354	RP11-519G16.3	NA	NA	ENSG00000259354_RP11-519G16.3	-4.40647	-3.43789	-17.2994	1.2521e-22	3.20953e-21	40.1914
ENSG00000156284	CLDN8	9073	P56748	ENSG00000156284_CLDN8	-8.33437	1.77073	-17.2919	1.27537e-22	3.26434e-21	40.8502
ENSG00000153993	SEMA3D	223117	O95025	ENSG00000153993_SEMA3D	3.09344	2.92914	17.2907	1.27917e-22	3.26924e-21	41.3189
ENSG00000107968	MAP3K8	1326	P41279	ENSG00000107968_MAP3K8	-3.2769	2.36716	-17.2679	1.35295e-22	3.45272e-21	41.2711
ENSG00000161798	AQP5	362	P55064	ENSG00000161798_AQP5	-6.98671	-0.825604	-17.2589	1.38357e-22	3.52566e-21	40.5244
ENSG00000123143	PKN1	5585	K7EPK3	ENSG00000123143_PKN1	-2.58532	4.55685	-17.2418	1.44299e-22	3.6663e-21	41.0421
ENSG00000175130	MARCKSL1	65108	P49006	ENSG00000175130_MARCKSL1	-2.6716	5.93659	-17.2421	1.44214e-22	3.6663e-21	40.8759
ENSG00000168003	SLC3A2	6520	P08195	ENSG00000168003_SLC3A2	1.93978	8.75934	17.2242	1.50714e-22	3.81808e-21	40.6767
ENSG00000182263	FIGN	55137	B8ZZS6	ENSG00000182263_FIGN	-1.11838	4.66997	-17.2224	1.51378e-22	3.82932e-21	40.9011
ENSG00000136531	SCN2A	6326	NA	ENSG00000136531_SCN2A	4.6051	1.00079	17.2208	1.52005e-22	3.83957e-21	40.9701
ENSG00000138074	SLC5A6	8884	Q9Y289	ENSG00000138074_SLC5A6	-1.70616	6.49369	-17.2082	1.56804e-22	3.95502e-21	40.7016
ENSG00000169242	EFNA1	1942	P20827	ENSG00000169242_EFNA1	-2.13019	4.84112	-17.2047	1.58152e-22	3.98323e-21	40.8807
ENSG00000147465	STAR	6770	P49675	ENSG00000147465_STAR	4.93044	-0.344011	17.1953	1.61879e-22	4.06789e-21	40.671
ENSG00000021826	CPS1	1373	C9JTA4	ENSG00000021826_CPS1	1.99736	5.13472	17.1945	1.62218e-22	4.06789e-21	40.8723
ENSG00000205220	PSMB10	5699	P40306	ENSG00000205220_PSMB10	-2.15583	2.3358	-17.1945	1.62191e-22	4.06789e-21	41.0888
ENSG00000163590	PPM1L	151742	Q5SGD2	ENSG00000163590_PPM1L	-2.79532	2.89243	-17.1695	1.72573e-22	4.32132e-21	41.0195
ENSG00000087128	TMPRSS11E	28983	Q9UL52	ENSG00000087128_TMPRSS11E	-3.64547	3.86007	-17.1615	1.76024e-22	4.40135e-21	40.9608
ENSG00000168763	CNNM3	26505	Q8NE01	ENSG00000168763_CNNM3	-1.0419	3.88846	-17.1569	1.78016e-22	4.44476e-21	40.8643
ENSG00000121039	RDH10	157506	Q8IZV5	ENSG00000121039_RDH10	-1.86392	5.3209	-17.1384	1.86406e-22	4.64055e-21	40.6398
ENSG00000204839	MROH6	642475	A6NGR9	ENSG00000204839_MROH6	-2.1632	4.51227	-17.1378	1.86661e-22	4.64055e-21	40.7278
ENSG00000145103	ILDR1	286676	Q86SU0	ENSG00000145103_ILDR1	-4.18144	0.475563	-17.1379	1.86635e-22	4.64055e-21	40.701
ENSG00000175066	GK5	256356	Q6ZS86	ENSG00000175066_GK5	-1.37814	4.87714	-17.1325	1.89124e-22	4.68832e-21	40.6523
ENSG00000101276	SLC52A3	113278	Q9NQ40	ENSG00000101276_SLC52A3	-5.01607	0.857371	-17.1326	1.89077e-22	4.68832e-21	40.7266
ENSG00000166681	BEX3	27018	Q00994	ENSG00000166681_BEX3	1.3048	5.62384	17.1256	1.92384e-22	4.75555e-21	40.5909
ENSG00000197536	C5orf56	NA	Q8N8D9	ENSG00000197536_C5orf56	-2.89699	0.381956	-17.0948	2.07679e-22	5.12631e-21	40.7002
ENSG00000164070	HSPA4L	22824	O95757	ENSG00000164070_HSPA4L	1.13068	7.21354	17.0909	2.09734e-22	5.16967e-21	40.3728
ENSG00000143702	CEP170	645455	Q5SW79	ENSG00000143702_CEP170	1.02911	5.17786	17.0828	2.13991e-22	5.26709e-21	40.5083
ENSG00000038295	TLL1	7092	O43897	ENSG00000038295_TLL1	3.86355	3.22021	17.076	2.17634e-22	5.34916e-21	40.7942
ENSG00000163702	IL17RC	84818	Q8NAC3	ENSG00000163702_IL17RC	-1.52949	4.55221	-17.0702	2.208e-22	5.41929e-21	40.5853
ENSG00000162105	SHANK2	22941	E7EUA2	ENSG00000162105_SHANK2	-3.85616	4.23555	-17.0622	2.2522e-22	5.51216e-21	40.6913
ENSG00000100077	GRK3	157	P35626	ENSG00000100077_GRK3	1.78227	4.85845	17.053	2.30416e-22	5.62345e-21	40.5158
ENSG00000134955	SLC37A2	219855	Q8TED4	ENSG00000134955_SLC37A2	1.87853	4.88723	17.0434	2.36023e-22	5.74412e-21	40.4799
ENSG00000003402	CFLAR	8837	O15519	ENSG00000003402_CFLAR	-1.33982	6.84857	-17.039	2.38597e-22	5.7986e-21	40.2569
ENSG00000182585	EPGN	255324	Q6UW88	ENSG00000182585_EPGN	2.40145	5.99135	17.0349	2.41069e-22	5.85047e-21	40.3327
ENSG00000079385	CEACAM1	634	P13688	ENSG00000079385_CEACAM1	-3.84644	5.39927	-17.0287	2.44839e-22	5.93367e-21	40.5015
ENSG00000148341	SH3GLB2	56904	Q9NR46	ENSG00000148341_SH3GLB2	-1.04725	5.99597	-17.024	2.4772e-22	5.99509e-21	40.2627
ENSG00000146648	EGFR	1956	Q504U8	ENSG00000146648_EGFR	1.2833	9.22178	16.9995	2.63306e-22	6.35456e-21	40.1043
ENSG00000164125	FAM198B	51313	Q6UWH4	ENSG00000164125_FAM198B	2.24654	4.74628	16.9943	2.66749e-22	6.42869e-21	40.423
ENSG00000166391	MOGAT2	80168	Q3SYC2	ENSG00000166391_MOGAT2	-5.61544	-2.55608	-16.9913	2.68754e-22	6.46802e-21	39.6646
ENSG00000223829	AC004870.4	NA	NA	ENSG00000223829_AC004870.4	-4.32982	-2.69133	-16.9549	2.94283e-22	7.05303e-21	39.5996
ENSG00000206337	HCP5	10866	NA	ENSG00000206337_HCP5	-2.90261	3.40646	-16.9293	3.13751e-22	7.49886e-21	40.3904
ENSG00000120055	C10orf95	79946	NA	ENSG00000120055_C10orf95	-1.5426	1.29197	-16.9278	3.14947e-22	7.51708e-21	40.4098
ENSG00000135605	TEC	7006	P42680	ENSG00000135605_TEC	-2.40823	1.1757	-16.9261	3.1628e-22	7.53852e-21	40.3924
ENSG00000142227	EMP3	2014	M0QZ66	ENSG00000142227_EMP3	1.96478	4.85051	16.9251	3.17077e-22	7.54712e-21	40.1764
ENSG00000140398	NEIL1	79661	H3BRZ2	ENSG00000140398_NEIL1	-2.92955	2.71502	-16.9222	3.19407e-22	7.59216e-21	40.4015
ENSG00000164796	CSMD3	114788	Q7Z407	ENSG00000164796_CSMD3	3.35113	0.902737	16.9208	3.20477e-22	7.60716e-21	40.3011
ENSG00000024422	EHD2	30846	Q9NZN4	ENSG00000024422_EHD2	1.12319	8.1451	16.9192	3.21787e-22	7.6278e-21	39.914
ENSG00000147231	CXorf57	55086	Q6NSI4	ENSG00000147231_CXorf57	2.48149	2.14801	16.9109	3.28527e-22	7.77693e-21	40.3907
ENSG00000168807	SNTB2	6645	Q13425	ENSG00000168807_SNTB2	1.25865	5.78659	16.8905	3.4577e-22	8.17395e-21	39.9616
ENSG00000187800	PEAR1	375033	F2Z2F7	ENSG00000187800_PEAR1	3.59089	1.08029	16.8853	3.50334e-22	8.27056e-21	40.2316
ENSG00000230453	ANKRD18B	441459	A2A2Z9	ENSG00000230453_ANKRD18B	4.05941	0.473459	16.8772	3.57467e-22	8.42747e-21	40.0605
ENSG00000226887	ERVMER34-1	100288413	NA	ENSG00000226887_ERVMER34-1	2.26753	4.83511	16.8663	3.67396e-22	8.63805e-21	40.0439
ENSG00000129595	EPB41L4A	64097	NA	ENSG00000129595_EPB41L4A	-3.50815	4.48305	-16.8627	3.70693e-22	8.70376e-21	40.1731
ENSG00000237361	TUSC8	NA	NA	ENSG00000237361_TUSC8	-4.23812	-3.29767	-16.8561	3.76964e-22	8.82706e-21	39.2142
ENSG00000171105	INSR	3643	P06213	ENSG00000171105_INSR	-3.77837	4.37532	-16.8424	3.90118e-22	9.12275e-21	40.1222
ENSG00000105643	ARRDC2	27106	Q8TBH0	ENSG00000105643_ARRDC2	-1.78059	3.41184	-16.8398	3.92657e-22	9.16976e-21	40.1354
ENSG00000178695	KCTD12	115207	Q96CX2	ENSG00000178695_KCTD12	1.72146	6.89516	16.8371	3.95377e-22	9.22085e-21	39.7502
ENSG00000011198	ABHD5	51099	C9JBM3	ENSG00000011198_ABHD5	-1.25429	5.44331	-16.8327	3.99779e-22	9.31099e-21	39.8442
ENSG00000177822	AC108142.1	NA	NA	ENSG00000177822_AC108142.1	2.70595	2.29643	16.8257	4.06796e-22	9.44901e-21	40.1777
ENSG00000142197	DOPEY2	9980	F8W8U9	ENSG00000142197_DOPEY2	-1.22198	5.02298	-16.826	4.0654e-22	9.44901e-21	39.8891
ENSG00000265485	RP11-449D8.1	729950	NA	ENSG00000265485_RP11-449D8.1	-3.14138	-3.75929	-16.7958	4.3861e-22	1.01743e-20	38.9346
ENSG00000198429	ZNF69	7620	Q9UC07	ENSG00000198429_ZNF69	-2.59101	1.36552	-16.7827	4.533e-22	1.0501e-20	40.0483
ENSG00000065060	UHRF1BP1	54887	Q6BDS2	ENSG00000065060_UHRF1BP1	-1.25716	5.43178	-16.7538	4.87527e-22	1.12488e-20	39.6606
ENSG00000168917	SLC35G2	80723	NA	ENSG00000168917_SLC35G2	1.98483	2.62183	16.7332	5.13456e-22	1.18156e-20	39.9266
ENSG00000225614	ZNF469	84627	H3BS19	ENSG00000225614_ZNF469	-5.95238	2.33779	-16.7271	5.21441e-22	1.19835e-20	39.8734
ENSG00000165929	TC2N	123036	Q8N9U0	ENSG00000165929_TC2N	-1.39241	5.83031	-16.7266	5.22133e-22	1.19835e-20	39.5492
ENSG00000103257	SLC7A5	8140	A0A0C4DGL4	ENSG00000103257_SLC7A5	2.24716	10.6637	16.7202	5.30689e-22	1.21637e-20	39.3941
ENSG00000148734	NPFFR1	64106	Q9GZQ6	ENSG00000148734_NPFFR1	-5.24788	-0.91376	-16.7157	5.3665e-22	1.22679e-20	39.3852
ENSG00000162645	GBP2	2634	P32456	ENSG00000162645_GBP2	-3.63573	3.6323	-16.7094	5.4528e-22	1.24324e-20	39.8477
ENSG00000160862	AZGP1	563	NA	ENSG00000160862_AZGP1	-8.55507	4.18107	-16.7088	5.46095e-22	1.24346e-20	39.8343
ENSG00000182732	RGS6	9628	P49758	ENSG00000182732_RGS6	-4.94605	-3.10936	-16.6918	5.70068e-22	1.29464e-20	38.8683
ENSG00000132470	ITGB4	3691	P16144	ENSG00000132470_ITGB4	1.469	11.0233	16.6852	5.7974e-22	1.31149e-20	39.3032
ENSG00000070190	DAPP1	27071	J3KNB3	ENSG00000070190_DAPP1	-2.59828	4.32878	-16.6851	5.79756e-22	1.31149e-20	39.6704
ENSG00000171812	COL8A2	1296	P25067	ENSG00000171812_COL8A2	2.81852	2.3528	16.6724	5.98801e-22	1.35281e-20	39.7945
ENSG00000178078	STAP2	55620	M0QY82	ENSG00000178078_STAP2	-1.11658	5.57372	-16.6708	6.01143e-22	1.35633e-20	39.4265
ENSG00000102452	NALCN	259232	Q8IZF0	ENSG00000102452_NALCN	-3.24656	1.56867	-16.6646	6.10706e-22	1.37611e-20	39.7545
ENSG00000146021	KLHL3	26249	Q9UH77	ENSG00000146021_KLHL3	1.50713	2.65675	16.6582	6.20663e-22	1.39673e-20	39.7307
ENSG00000262601	NA	NA	NA	ENSG00000262601_NA	2.86285	-0.823729	16.6537	6.27772e-22	1.40907e-20	39.382
ENSG00000068366	ACSL4	2182	NA	ENSG00000068366_ACSL4	1.18162	7.45511	16.6527	6.29315e-22	1.41071e-20	39.2513
ENSG00000133639	BTG1	694	P62324	ENSG00000133639_BTG1	-2.06519	7.60403	-16.6326	6.62134e-22	1.48236e-20	39.2066
ENSG00000144746	ARL6IP5	10550	O75915	ENSG00000144746_ARL6IP5	-1.00107	7.56718	-16.618	6.87181e-22	1.53645e-20	39.1625
ENSG00000269190	FBXO17	115290	M0QZ95	ENSG00000269190_FBXO17	1.98685	3.10912	16.5982	7.22514e-22	1.61129e-20	39.5575
ENSG00000163297	ANTXR2	118429	P58335	ENSG00000163297_ANTXR2	2.45695	5.9386	16.5841	7.48776e-22	1.66557e-20	39.2045
ENSG00000175600	SUGCT	79783	Q9HAC7	ENSG00000175600_SUGCT	2.68129	2.65634	16.5695	7.77137e-22	1.72644e-20	39.5302
ENSG00000272565	NA	NA	NA	ENSG00000272565_NA	-1.38758	4.54425	-16.5549	8.06582e-22	1.78956e-20	39.2533
ENSG00000163083	INHBB	3625	P09529	ENSG00000163083_INHBB	-7.71333	1.83806	-16.541	8.35484e-22	1.85131e-20	39.1707
ENSG00000127249	ATP13A4	84239	Q4VNC1	ENSG00000127249_ATP13A4	-8.03437	1.05528	-16.5232	8.74133e-22	1.93448e-20	38.969
ENSG00000119125	GDA	9615	Q5SZC6	ENSG00000119125_GDA	-5.78972	0.611791	-16.5227	8.75294e-22	1.93458e-20	39.1526
ENSG00000183578	TNFAIP8L3	388121	Q5GJ75	ENSG00000183578_TNFAIP8L3	3.75633	0.0535237	16.5155	8.9154e-22	1.96798e-20	39.1727
ENSG00000182175	RGMA	56963	Q96B86	ENSG00000182175_RGMA	-4.1008	1.69025	-16.5141	8.94797e-22	1.97265e-20	39.3534
ENSG00000171102	OBP2B	29989	Q9NPH6	ENSG00000171102_OBP2B	-6.17837	-1.26833	-16.4964	9.36046e-22	2.06097e-20	38.7591
ENSG00000256916	RP11-817J15.2	NA	NA	ENSG00000256916_RP11-817J15.2	-6.77983	-1.18268	-16.4823	9.70256e-22	2.13358e-20	38.6743
ENSG00000253819	LINC01151	104266958	NA	ENSG00000253819_LINC01151	4.18939	-2.21189	16.4805	9.74717e-22	2.14067e-20	38.5826
ENSG00000174500	GCSAM	257144	Q8N6F7	ENSG00000174500_GCSAM	4.24143	-0.296872	16.4765	9.84563e-22	2.1543e-20	38.9675
ENSG00000176928	GCNT4	51301	Q9P109	ENSG00000176928_GCNT4	3.20139	1.5017	16.4768	9.83819e-22	2.1543e-20	39.2742
ENSG00000260196	RP1-239B22.5	NA	NA	ENSG00000260196_RP1-239B22.5	2.63562	0.931797	16.4765	9.84653e-22	2.1543e-20	39.255
ENSG00000246695	RASSF8-AS1	NA	NA	ENSG00000246695_RASSF8-AS1	1.66515	2.11985	16.4521	1.04783e-21	2.28964e-20	39.2302
ENSG00000175893	ZDHHC21	340481	Q8IVQ6	ENSG00000175893_ZDHHC21	-1.04765	4.64698	-16.437	1.08907e-21	2.37377e-20	38.898
ENSG00000153885	KCTD15	79047	K7EM48	ENSG00000153885_KCTD15	1.46937	5.34681	16.4363	1.09118e-21	2.37536e-20	38.8387
ENSG00000168461	RAB31	11031	Q13636	ENSG00000168461_RAB31	1.39557	6.14756	16.4331	1.09995e-21	2.39146e-20	38.7637
ENSG00000099250	NRP1	8829	Q5JWQ6	ENSG00000099250_NRP1	2.10457	7.1353	16.4239	1.12613e-21	2.44532e-20	38.6928
ENSG00000188747	NOXA1	10811	Q86UR1	ENSG00000188747_NOXA1	-4.62339	0.642107	-16.4191	1.14012e-21	2.47259e-20	38.9842
ENSG00000171159	C9orf16	79095	Q9BUW7	ENSG00000171159_C9orf16	-1.36681	4.88089	-16.414	1.15492e-21	2.50155e-20	38.851
ENSG00000183722	LHFP	10186	Q9Y693	ENSG00000183722_LHFP	1.75542	3.59096	16.4067	1.17678e-21	2.54573e-20	39.0121
ENSG00000057019	DCBLD2	131566	Q96PD2	ENSG00000057019_DCBLD2	1.43466	9.24912	16.4027	1.18883e-21	2.56685e-20	38.5774
ENSG00000135454	B4GALNT1	2583	NA	ENSG00000135454_B4GALNT1	3.90868	2.07353	16.4	1.19711e-21	2.58005e-20	39.0997
ENSG00000155380	SLC16A1	6566	P53985	ENSG00000155380_SLC16A1	1.12392	8.35828	16.3993	1.19935e-21	2.58166e-20	38.5802
ENSG00000184012	TMPRSS2	7113	O15393	ENSG00000184012_TMPRSS2	-8.56356	1.73631	-16.3904	1.2269e-21	2.63767e-20	38.7188
ENSG00000183579	ZNRF3	84133	Q9ULT6	ENSG00000183579_ZNRF3	1.21477	4.32515	16.3896	1.22925e-21	2.63947e-20	38.865
ENSG00000215769	RP13-104F24.2	146880	NA	ENSG00000215769_RP13-104F24.2	-1.89951	3.3539	-16.3842	1.24643e-21	2.67303e-20	38.9343
ENSG00000169550	MUC15	143662	Q8N387	ENSG00000169550_MUC15	-7.67069	0.201909	-16.3785	1.26481e-21	2.70911e-20	38.5179
ENSG00000092068	SLC7A8	23428	H0Y2X7	ENSG00000092068_SLC7A8	5.00184	3.82645	16.3769	1.26992e-21	2.71668e-20	39.0247
ENSG00000180660	MAB21L1	4081	Q13394	ENSG00000180660_MAB21L1	5.11988	1.31523	16.3724	1.28483e-21	2.74519e-20	38.9067
ENSG00000196586	MYO6	4646	Q9UM54	ENSG00000196586_MYO6	-1.24432	7.1791	-16.3693	1.29501e-21	2.76354e-20	38.5299
ENSG00000148841	ITPRIP	85450	Q8IWB1	ENSG00000148841_ITPRIP	1.25542	5.625	16.367	1.30268e-21	2.77649e-20	38.6406
ENSG00000105699	LSR	51599	NA	ENSG00000105699_LSR	-1.09155	7.37343	-16.3616	1.32076e-21	2.81157e-20	38.506
ENSG00000170776	AKAP13	102465803	NA	ENSG00000170776_AKAP13	-1.04044	7.05528	-16.3611	1.32249e-21	2.8118e-20	38.5182
ENSG00000270157	RP5-894A10.6	NA	NA	ENSG00000270157_RP5-894A10.6	-1.65502	1.8958	-16.3508	1.35784e-21	2.88342e-20	38.9727
ENSG00000235098	ANKRD65	441869	E5RJM6	ENSG00000235098_ANKRD65	2.21561	2.28033	16.3493	1.36327e-21	2.89141e-20	38.9761
ENSG00000005001	PRSS22	64063	Q9GZN4	ENSG00000005001_PRSS22	-4.3398	2.5164	-16.3455	1.37659e-21	2.91609e-20	38.9676
ENSG00000147408	CSGALNACT1	55790	Q8TDX6	ENSG00000147408_CSGALNACT1	-4.43691	3.6772	-16.3441	1.38127e-21	2.92242e-20	38.9316
ENSG00000181982	CCDC149	91050	Q6ZUS6	ENSG00000181982_CCDC149	-1.5314	3.21511	-16.3369	1.407e-21	2.97323e-20	38.8763
ENSG00000172575	RASGRP1	10125	O95267	ENSG00000172575_RASGRP1	-5.51662	-1.69639	-16.3302	1.43165e-21	3.02164e-20	38.3366
ENSG00000157978	LDLRAP1	26119	Q5SW96	ENSG00000157978_LDLRAP1	1.0336	5.8874	16.3218	1.46258e-21	3.08317e-20	38.487
ENSG00000163508	EOMES	8320	O95936	ENSG00000163508_EOMES	5.25198	-0.194214	16.3213	1.46474e-21	3.08396e-20	38.5061
ENSG00000258483	AC144835.1	NA	NA	ENSG00000258483_AC144835.1	-4.75413	-2.77619	-16.3162	1.48392e-21	3.12055e-20	38.1448
ENSG00000182319	NA	NA	NA	ENSG00000182319_NA	-1.31425	5.58039	-16.3135	1.49428e-21	3.13853e-20	38.4989
ENSG00000151376	ME3	10873	Q16798	ENSG00000151376_ME3	-1.48038	3.26568	-16.3024	1.53726e-21	3.2249e-20	38.7621
ENSG00000125827	TMX4	56255	Q9H1E5	ENSG00000125827_TMX4	1.06204	6.60449	16.2957	1.56422e-21	3.27749e-20	38.3711
ENSG00000034693	PEX3	8504	Q7Z6V3	ENSG00000034693_PEX3	1.01177	5.24505	16.291	1.58322e-21	3.31329e-20	38.4751
ENSG00000163710	PCOLCE2	26577	H7C5D5	ENSG00000163710_PCOLCE2	2.86817	2.97263	16.2898	1.58818e-21	3.31966e-20	38.803
ENSG00000129925	TMEM8A	58986	Q9HCN3	ENSG00000129925_TMEM8A	-1.06755	5.95587	-16.2859	1.60415e-21	3.349e-20	38.3888
ENSG00000165138	ANKS6	203286	H7C163	ENSG00000165138_ANKS6	1.99771	4.05295	16.2815	1.62218e-21	3.38257e-20	38.634
ENSG00000107281	NPDC1	56654	Q5SPY9	ENSG00000107281_NPDC1	-1.39339	5.66273	-16.2752	1.64886e-21	3.43408e-20	38.3789
ENSG00000147676	MAL2	114569	A0A087WZL1	ENSG00000147676_MAL2	-2.15543	7.79122	-16.2684	1.6779e-21	3.49036e-20	38.259
ENSG00000152767	FARP1	10160	C9JME2	ENSG00000152767_FARP1	-1.37349	6.61659	-16.2626	1.70314e-21	3.5386e-20	38.2802
ENSG00000204767	FAM196B	100131897	A6NMK8	ENSG00000204767_FAM196B	4.55788	1.50954	16.2587	1.72038e-21	3.57015e-20	38.69
ENSG00000257588	RP11-469H8.6	101927318	NA	ENSG00000257588_RP11-469H8.6	-3.77567	-3.7088	-16.2485	1.76584e-21	3.6601e-20	37.7519
ENSG00000248905	FMN1	342184	Q68DA7	ENSG00000248905_FMN1	-1.36815	4.72954	-16.2385	1.81228e-21	3.74292e-20	38.4111
ENSG00000126351	THRA	7067	J3QR26	ENSG00000126351_THRA	1.1527	4.49235	16.2357	1.82515e-21	3.76502e-20	38.4461
ENSG00000249007	RP11-510N19.5	NA	NA	ENSG00000249007_RP11-510N19.5	-5.16172	-2.27478	-16.2204	1.89857e-21	3.90717e-20	38.0256
ENSG00000152818	UTRN	7402	Q5SYY2	ENSG00000152818_UTRN	-1.00007	6.93808	-16.2133	1.9338e-21	3.97496e-20	38.1379
ENSG00000273193	NA	NA	NA	ENSG00000273193_NA	-4.32632	-3.1844	-16.2084	1.95837e-21	4.02069e-20	37.7087
ENSG00000090382	LYZ	4069	P61626	ENSG00000090382_LYZ	-5.24554	-2.40867	-16.2	2.00118e-21	4.10372e-20	37.8489
ENSG00000172197	MBOAT1	154141	Q6ZNC8	ENSG00000172197_MBOAT1	-1.29115	4.5857	-16.1966	2.01886e-21	4.13508e-20	38.3078
ENSG00000125257	ABCC4	10257	O15439	ENSG00000125257_ABCC4	1.70426	4.4684	16.1937	2.03413e-21	4.16145e-20	38.3534
ENSG00000181826	RELL1	768211	Q8IUW5	ENSG00000181826_RELL1	1.51414	2.95113	16.1918	2.04387e-21	4.17644e-20	38.5166
ENSG00000143013	LMO4	8543	P61968	ENSG00000143013_LMO4	-1.43896	5.24008	-16.1905	2.05092e-21	4.1859e-20	38.2309
ENSG00000059122	FLYWCH1	84256	Q4VC44	ENSG00000059122_FLYWCH1	1.21256	5.15413	16.1885	2.06173e-21	4.20301e-20	38.1993
ENSG00000175550	DRAP1	10589	Q14919	ENSG00000175550_DRAP1	1.09239	7.11296	16.1865	2.07193e-21	4.21886e-20	38.0621
ENSG00000052344	PRSS8	5652	Q16651	ENSG00000052344_PRSS8	-2.01182	6.2545	-16.1845	2.083e-21	4.23145e-20	38.1242
ENSG00000232530	RP1-102K2.6	NA	NA	ENSG00000232530_RP1-102K2.6	-3.89967	-3.23735	-16.1733	2.14387e-21	4.34999e-20	37.6217
ENSG00000214063	TSPAN4	7106	O14817	ENSG00000214063_TSPAN4	1.62266	4.49669	16.1653	2.18856e-21	4.43029e-20	38.2592
ENSG00000149256	TENM4	26011	Q6N022	ENSG00000149256_TENM4	4.46238	2.02857	16.1588	2.22605e-21	4.50092e-20	38.4517
ENSG00000164691	TAGAP	117289	Q8N103	ENSG00000164691_TAGAP	-4.91231	-0.669599	-16.1572	2.23512e-21	4.51401e-20	38.1401
ENSG00000079337	RAPGEF3	10411	O95398	ENSG00000079337_RAPGEF3	3.22377	4.08405	16.1558	2.24334e-21	4.52533e-20	38.3549
ENSG00000153551	CMTM7	112616	Q96FZ5	ENSG00000153551_CMTM7	-1.03587	6.42447	-16.1509	2.2715e-21	4.57205e-20	37.9987
ENSG00000272734	ADIRF-AS1	NA	NA	ENSG00000272734_ADIRF-AS1	1.74723	2.9728	16.1495	2.28003e-21	4.57803e-20	38.3904
ENSG00000100065	CARD10	29775	NA	ENSG00000100065_CARD10	1.29071	6.81119	16.1461	2.30026e-21	4.6133e-20	37.9598
ENSG00000008083	JARID2	3720	Q92833	ENSG00000008083_JARID2	1.09175	5.70859	16.1404	2.33426e-21	4.67607e-20	38.0354
ENSG00000197084	LCE1C	353133	Q5T751	ENSG00000197084_LCE1C	4.0635	-2.40689	16.1171	2.47913e-21	4.96055e-20	37.6484
ENSG00000124107	SLPI	6590	P03973	ENSG00000124107_SLPI	-4.46792	5.8831	-16.1127	2.50765e-21	5.00606e-20	38.1266
ENSG00000157227	MMP14	4323	P50281	ENSG00000157227_MMP14	1.34911	8.90975	16.1105	2.52241e-21	5.02972e-20	37.8195
ENSG00000185467	KPNA7	402569	A9QM74	ENSG00000185467_KPNA7	-3.45461	-1.99885	-16.1059	2.55264e-21	5.08414e-20	37.7874
ENSG00000270107	NA	NA	NA	ENSG00000270107_NA	-5.08933	-2.04776	-16.0966	2.61495e-21	5.19631e-20	37.7104
ENSG00000113430	IRX4	50805	P78413	ENSG00000113430_IRX4	2.985	5.29212	16.0929	2.63955e-21	5.23919e-20	38.0487
ENSG00000026103	FAS	355	A0A087WTM9	ENSG00000026103_FAS	1.17886	5.24554	16.0751	2.76431e-21	5.47428e-20	37.9194
ENSG00000169087	HSPBAP1	79663	NA	ENSG00000169087_HSPBAP1	1.173	2.72956	16.0736	2.77539e-21	5.48996e-20	38.2107
ENSG00000115526	CHST10	9486	O43529	ENSG00000115526_CHST10	3.264	2.12277	16.0695	2.80488e-21	5.54196e-20	38.2615
ENSG00000197956	S100A6	6277	P06703	ENSG00000197956_S100A6	-1.4258	10.7543	-16.0629	2.85378e-21	5.63201e-20	37.6883
ENSG00000143466	NA	NA	NA	ENSG00000143466_NA	-1.35143	4.11153	-16.0587	2.88441e-21	5.67967e-20	38.0261
ENSG00000126091	ST3GAL3	6487	E9PJI3	ENSG00000126091_ST3GAL3	1.54249	2.17257	16.0572	2.89616e-21	5.69632e-20	38.2169
ENSG00000230834	AC068580.7	NA	NA	ENSG00000230834_AC068580.7	-4.14123	-1.94056	-16.0536	2.92295e-21	5.74251e-20	37.6361
ENSG00000233834	AC005083.1	100506098	NA	ENSG00000233834_AC005083.1	-3.76269	-1.1134	-16.0415	3.01658e-21	5.91973e-20	37.806
ENSG00000167861	HID1	283987	NA	ENSG00000167861_HID1	-5.20761	1.98495	-16.0367	3.05459e-21	5.98755e-20	38.1318
ENSG00000231666	RP11-404O13.1	646268	NA	ENSG00000231666_RP11-404O13.1	4.21878	-2.82652	16.0273	3.12951e-21	6.12748e-20	37.3597
ENSG00000270097	NA	NA	NA	ENSG00000270097_NA	-4.832	-1.97304	-16.0255	3.14487e-21	6.15059e-20	37.662
ENSG00000156127	BATF	10538	Q16520	ENSG00000156127_BATF	-5.24662	-2.90595	-16.0192	3.19621e-21	6.24397e-20	37.3901
ENSG00000171236	LRG1	116844	P02750	ENSG00000171236_LRG1	-5.12396	-0.547468	-16.0183	3.20419e-21	6.25251e-20	37.7165
ENSG00000234961	RP11-124N14.3	NA	NA	ENSG00000234961_RP11-124N14.3	3.12046	1.0121	16.017	3.21504e-21	6.25957e-20	38.0649
ENSG00000162241	SLC25A45	283130	NA	ENSG00000162241_SLC25A45	-1.82123	0.709739	-16.0099	3.27498e-21	6.36912e-20	38.0937
ENSG00000114812	VIPR1	7433	P32241	ENSG00000114812_VIPR1	-3.70204	1.71062	-16.0065	3.30421e-21	6.41877e-20	38.0909
ENSG00000242147	RP13-463N16.6	105376382	NA	ENSG00000242147_RP13-463N16.6	2.88164	0.952366	15.9993	3.36596e-21	6.5314e-20	38.0393
ENSG00000227292	AC009229.5	NA	NA	ENSG00000227292_AC009229.5	-3.98488	-2.59371	-15.9983	3.375e-21	6.54161e-20	37.4951
ENSG00000067141	NEO1	4756	Q92859	ENSG00000067141_NEO1	2.17395	4.24458	15.9824	3.51789e-21	6.81095e-20	37.8515
ENSG00000118276	B4GALT6	9331	NA	ENSG00000118276_B4GALT6	1.17907	4.11761	15.9811	3.52933e-21	6.82546e-20	37.8088
ENSG00000163082	SGPP2	130367	Q8IWX5	ENSG00000163082_SGPP2	-5.68297	2.09218	-15.9795	3.54474e-21	6.84763e-20	37.9226
ENSG00000171033	PKIA	5569	P61925	ENSG00000171033_PKIA	4.4829	0.684827	15.9558	3.77018e-21	7.25886e-20	37.8444
ENSG00000139668	WDFY2	115825	A0A087WZX3	ENSG00000139668_WDFY2	1.05082	5.38724	15.9534	3.79376e-21	7.29614e-20	37.5585
ENSG00000213903	LTB4R	1241	G3V244	ENSG00000213903_LTB4R	2.61527	4.4701	15.9502	3.82591e-21	7.34981e-20	37.7494
ENSG00000145362	ANK2	287	H0Y933	ENSG00000145362_ANK2	3.56757	0.0630386	15.9482	3.84525e-21	7.3788e-20	37.7572
ENSG00000152217	SETBP1	26040	Q9Y6X0	ENSG00000152217_SETBP1	1.73285	4.52768	15.9283	4.05019e-21	7.73778e-20	37.6462
ENSG00000111145	ELK3	2004	P41970	ENSG00000111145_ELK3	1.2008	6.96648	15.9269	4.06564e-21	7.75875e-20	37.3812
ENSG00000124766	SOX4	6659	Q06945	ENSG00000124766_SOX4	-1.3977	7.32716	-15.914	4.20494e-21	8.01575e-20	37.3356
ENSG00000111341	MGP	4256	P08493	ENSG00000111341_MGP	-7.17005	6.49492	-15.9117	4.22966e-21	8.05401e-20	37.7246
ENSG00000273259	SERPINA3	12	G3V5I3	ENSG00000273259_SERPINA3	-5.04322	-2.54743	-15.9017	4.34139e-21	8.2396e-20	37.1012
ENSG00000240859	AC093627.10	NA	NA	ENSG00000240859_AC093627.10	-1.73368	1.976	-15.8811	4.58172e-21	8.68623e-20	37.7712
ENSG00000172164	SNTB1	6641	Q13884	ENSG00000172164_SNTB1	-6.82185	0.696647	-15.8753	4.65198e-21	8.80977e-20	37.4161
ENSG00000113231	PDE8B	8622	D6RJD7	ENSG00000113231_PDE8B	-4.26698	-1.7475	-15.8636	4.79737e-21	9.0752e-20	37.2854
ENSG00000184916	JAG2	3714	Q9Y219	ENSG00000184916_JAG2	1.31399	6.60068	15.8567	4.88368e-21	9.22839e-20	37.215
ENSG00000156113	KCNMA1	3778	S4R2X4	ENSG00000156113_KCNMA1	5.15023	2.46429	15.8536	4.92447e-21	9.29533e-20	37.6894
ENSG00000148346	LCN2	3934	P80188	ENSG00000148346_LCN2	-7.58223	4.98359	-15.8443	5.04533e-21	9.5131e-20	37.6695
ENSG00000171388	APLN	8862	Q9ULZ1	ENSG00000171388_APLN	3.85008	1.50956	15.8368	5.14496e-21	9.69042e-20	37.6291
ENSG00000135697	BCO1	53630	Q9HAY6	ENSG00000135697_BCO1	-4.47787	-2.68222	-15.8341	5.18223e-21	9.75003e-20	36.9702
ENSG00000198774	RASSF9	9182	O75901	ENSG00000198774_RASSF9	1.72152	3.34694	15.8336	5.18905e-21	9.75226e-20	37.5507
ENSG00000115041	KCNIP3	30818	Q9Y2W7	ENSG00000115041_KCNIP3	-2.96888	4.0272	-15.8312	5.22211e-21	9.80376e-20	37.5016
ENSG00000255026	RP11-326C3.2	NA	NA	ENSG00000255026_RP11-326C3.2	-5.48502	-2.36599	-15.817	5.42033e-21	1.01649e-19	37.0214
ENSG00000165359	INTS6L	203522	Q5JSJ4	ENSG00000165359_INTS6L	1.3289	3.9804	15.8153	5.44407e-21	1.01874e-19	37.3697
ENSG00000108797	CNTNAP1	8506	P78357	ENSG00000108797_CNTNAP1	2.63859	1.87206	15.8081	5.54775e-21	1.03702e-19	37.5848
ENSG00000272282	RP11-222K16.2	NA	NA	ENSG00000272282_RP11-222K16.2	4.02081	-1.42809	15.8015	5.64526e-21	1.05411e-19	37.1075
ENSG00000183421	RIPK4	54101	P57078	ENSG00000183421_RIPK4	-1.46419	7.07826	-15.7969	5.71273e-21	1.06556e-19	37.0331
ENSG00000136828	RALGPS1	9649	Q5JS13	ENSG00000136828_RALGPS1	-2.7922	0.878267	-15.7911	5.80028e-21	1.08072e-19	37.5044
ENSG00000071054	MAP4K4	9448	E7ETN6	ENSG00000071054_MAP4K4	1.18893	8.8966	15.7808	5.96014e-21	1.10932e-19	36.9477
ENSG00000065675	PRKCQ	5588	Q04759	ENSG00000065675_PRKCQ	3.24611	2.75629	15.7656	6.20308e-21	1.15329e-19	37.458
ENSG00000088448	ANKRD10	55608	Q9NXR5	ENSG00000088448_ANKRD10	-1.00887	5.21716	-15.7592	6.30822e-21	1.17033e-19	37.0399
ENSG00000182489	XKRX	402415	Q6PP77	ENSG00000182489_XKRX	-2.43806	-0.210366	-15.7509	6.44696e-21	1.19479e-19	37.2998
ENSG00000187678	SPRY4	81848	A0A0C4DFS6	ENSG00000187678_SPRY4	1.83859	4.7901	15.7401	6.63272e-21	1.2279e-19	37.1042
ENSG00000103489	XYLT1	64131	Q86Y38	ENSG00000103489_XYLT1	4.09886	4.53878	15.7281	6.84615e-21	1.26471e-19	37.2432
ENSG00000113070	HBEGF	1839	Q99075	ENSG00000113070_HBEGF	1.87189	5.6146	15.7249	6.90363e-21	1.27397e-19	36.9843
ENSG00000132321	IQCA1	79781	Q86XH1	ENSG00000132321_IQCA1	3.57491	2.86482	15.7135	7.11379e-21	1.30996e-19	37.3269
ENSG00000072954	TMEM38A	79041	Q9H6F2	ENSG00000072954_TMEM38A	-2.137	2.31058	-15.7136	7.11286e-21	1.30996e-19	37.3244
ENSG00000130522	JUND	3727	P17535	ENSG00000130522_JUND	-1.24113	6.58805	-15.7086	7.20714e-21	1.32575e-19	36.8165
ENSG00000203727	SAMD5	389432	Q5TGI4	ENSG00000203727_SAMD5	4.56696	1.17923	15.6982	7.40653e-21	1.36098e-19	37.2368
ENSG00000176402	GJC3	349149	Q8NFK1	ENSG00000176402_GJC3	-5.5674	-1.62886	-15.6978	7.41456e-21	1.36101e-19	36.7766
ENSG00000128298	BAIAP2L2	80115	Q6UXY1	ENSG00000128298_BAIAP2L2	2.14561	2.64297	15.6893	7.58324e-21	1.3905e-19	37.2436
ENSG00000142661	MYOM3	127294	Q5VTT5	ENSG00000142661_MYOM3	4.11492	-0.99056	15.6848	7.67359e-21	1.40558e-19	36.8936
ENSG00000006468	ETV1	2115	P50549	ENSG00000006468_ETV1	2.69181	3.09933	15.6843	7.68322e-21	1.40586e-19	37.2147
ENSG00000136383	ALPK3	57538	Q96L96	ENSG00000136383_ALPK3	-4.53658	0.350857	-15.6802	7.76756e-21	1.41979e-19	37.0844
ENSG00000152495	CAMK4	814	D6RE65	ENSG00000152495_CAMK4	5.09552	1.89667	15.6763	7.84807e-21	1.433e-19	37.2231
ENSG00000254535	PABPC4L	132430	P0CB38	ENSG00000254535_PABPC4L	3.41128	-1.02097	15.6666	8.0511e-21	1.46852e-19	36.9282
ENSG00000041353	RAB27B	5874	K7ES41	ENSG00000041353_RAB27B	-1.60288	5.86027	-15.6624	8.14037e-21	1.48268e-19	36.7691
ENSG00000167191	GPRC5B	51704	Q9NZH0	ENSG00000167191_GPRC5B	-6.37847	2.26739	-15.6622	8.14585e-21	1.48268e-19	37.1254
ENSG00000104140	RHOV	171177	Q96L33	ENSG00000104140_RHOV	-5.85782	3.44634	-15.6579	8.23787e-21	1.49786e-19	37.1911
ENSG00000166086	JAM3	83700	Q9BX67	ENSG00000166086_JAM3	4.87936	2.63738	15.6449	8.525e-21	1.54844e-19	37.1586
ENSG00000107957	SH3PXD2A	9644	Q5TCZ1	ENSG00000107957_SH3PXD2A	1.06095	8.40896	15.644	8.54612e-21	1.55065e-19	36.5872
ENSG00000234899	SOX9-AS1	102723517	NA	ENSG00000234899_SOX9-AS1	-3.88083	1.83506	-15.6387	8.66636e-21	1.57082e-19	37.1395
ENSG00000124249	KCNK15	60598	Q9H427	ENSG00000124249_KCNK15	-6.01952	-1.24446	-15.6298	8.87312e-21	1.60662e-19	36.6306
ENSG00000123146	ADGRE5	976	NA	ENSG00000123146_ADGRE5	-1.4815	5.5088	-15.6271	8.93746e-21	1.61658e-19	36.715
ENSG00000101986	ABCD1	215	P33897	ENSG00000101986_ABCD1	-1.99154	3.09704	-15.6191	9.12825e-21	1.64937e-19	36.9986
ENSG00000224260	RP1-272L16.1	NA	NA	ENSG00000224260_RP1-272L16.1	4.26266	-2.13689	15.6172	9.17216e-21	1.65558e-19	36.5378
ENSG00000135124	P2RX4	5025	Q99571	ENSG00000135124_P2RX4	-2.33866	2.26135	-15.6159	9.20484e-21	1.65975e-19	37.0719
ENSG00000026508	CD44	960	P16070	ENSG00000026508_CD44	1.0205	10.699	15.5928	9.78417e-21	1.75871e-19	36.4382
ENSG00000267279	RP11-879F14.2	NA	NA	ENSG00000267279_RP11-879F14.2	2.86438	0.957877	15.5866	9.94598e-21	1.78595e-19	36.9596
ENSG00000133321	RARRES3	5920	NA	ENSG00000133321_RARRES3	-4.96214	2.48631	-15.5761	1.02275e-20	1.8346e-19	36.9775
ENSG00000182054	IDH2	3418	P48735	ENSG00000182054_IDH2	-1.69176	6.06771	-15.5705	1.03816e-20	1.86031e-19	36.5112
ENSG00000151882	CCL28	56477	Q9NRJ3	ENSG00000151882_CCL28	-5.12886	5.34244	-15.5418	1.12017e-20	2.00106e-19	36.7108
ENSG00000172159	FRMD3	257019	A2A2Y4	ENSG00000172159_FRMD3	-6.46849	1.70719	-15.5412	1.12189e-20	2.00207e-19	36.7581
ENSG00000123612	ACVR1C	130399	Q8NER5	ENSG00000123612_ACVR1C	-4.26612	-0.00952222	-15.5364	1.13627e-20	2.02565e-19	36.7024
ENSG00000105649	RAB3A	5864	P20336	ENSG00000105649_RAB3A	-1.91897	1.05398	-15.5337	1.14455e-20	2.03831e-19	36.8522
ENSG00000177076	ACER2	340485	Q5QJU3	ENSG00000177076_ACER2	1.7055	1.97602	15.5256	1.16935e-20	2.07608e-19	36.8396
ENSG00000105426	PTPRS	5802	NA	ENSG00000105426_PTPRS	3.26459	4.27028	15.5168	1.19705e-20	2.12308e-19	36.6422
ENSG00000162755	KLHDC9	126823	NA	ENSG00000162755_KLHDC9	-2.13964	-0.00644665	-15.5145	1.20453e-20	2.13416e-19	36.6791
ENSG00000154493	C10orf90	118611	H7C3F8	ENSG00000154493_C10orf90	-6.25724	-1.95113	-15.5118	1.21322e-20	2.14517e-19	36.1981
ENSG00000203952	CCDC160	347475	A6NGH7	ENSG00000203952_CCDC160	-4.75992	-2.98084	-15.5022	1.24428e-20	2.19785e-19	36.0725
ENSG00000010818	HIVEP2	3097	P31629	ENSG00000010818_HIVEP2	1.12339	6.15892	15.5008	1.24891e-20	2.20379e-19	36.2995
ENSG00000072864	NDE1	619553	Q9NXR1	ENSG00000072864_NDE1	1.13793	5.84271	15.4863	1.29806e-20	2.28819e-19	36.285
ENSG00000100344	PNPLA3	80339	Q9NST1	ENSG00000100344_PNPLA3	-2.57703	3.64416	-15.4837	1.30724e-20	2.30202e-19	36.5895
ENSG00000137880	GCHFR	2644	P30047	ENSG00000137880_GCHFR	-2.87619	1.24562	-15.4741	1.34107e-20	2.35441e-19	36.6887
ENSG00000169715	MT1E	4493	P04732	ENSG00000169715_MT1E	2.37815	6.90809	15.4678	1.36354e-20	2.39143e-19	36.1866
ENSG00000116396	KCNC4	3749	NA	ENSG00000116396_KCNC4	-1.23291	4.23283	-15.4638	1.37836e-20	2.41499e-19	36.4243
ENSG00000174130	TLR6	10333	Q9Y2C9	ENSG00000174130_TLR6	-1.92635	3.92354	-15.4488	1.43433e-20	2.51051e-19	36.4176
ENSG00000198355	PIM3	415116	Q86V86	ENSG00000198355_PIM3	-1.36237	5.96075	-15.4376	1.47772e-20	2.58386e-19	36.1373
ENSG00000108639	SYNGR2	9144	O43760	ENSG00000108639_SYNGR2	-1.63003	6.04111	-15.4329	1.49665e-20	2.6143e-19	36.1439
ENSG00000154930	ACSS1	84532	NA	ENSG00000154930_ACSS1	3.02474	1.77479	15.42	1.54914e-20	2.70327e-19	36.5658
ENSG00000091428	RAPGEF4	11069	NA	ENSG00000091428_RAPGEF4	3.81804	-0.241797	15.4065	1.60592e-20	2.79953e-19	36.3642
ENSG00000154096	THY1	7070	P04216	ENSG00000154096_THY1	4.24192	3.94995	15.4044	1.61486e-20	2.80947e-19	36.4452
ENSG00000127252	HRASLS	57110	X6R3D1	ENSG00000127252_HRASLS	-3.45806	0.194323	-15.403	1.62063e-20	2.81668e-19	36.3946
ENSG00000164649	CDCA7L	55536	Q96GN5	ENSG00000164649_CDCA7L	1.36552	5.32712	15.399	1.63834e-20	2.84175e-19	36.1134
ENSG00000007968	E2F2	1870	Q14209	ENSG00000007968_E2F2	-2.64955	3.42799	-15.395	1.65595e-20	2.86944e-19	36.406
ENSG00000166126	AMN	81693	Q9BXJ7	ENSG00000166126_AMN	-3.81158	0.0817999	-15.3907	1.67494e-20	2.89654e-19	36.3803
ENSG00000140368	PSTPIP1	9051	H0YLM9	ENSG00000140368_PSTPIP1	2.49997	0.864936	15.3817	1.71554e-20	2.96085e-19	36.4402
ENSG00000131037	EPS8L1	54869	K7EN83	ENSG00000131037_EPS8L1	-1.96796	4.94775	-15.3802	1.72266e-20	2.97017e-19	36.1377
ENSG00000170271	FAXDC2	10826	Q96IV6	ENSG00000170271_FAXDC2	-3.21583	1.22978	-15.3754	1.74467e-20	3.00513e-19	36.4156
ENSG00000125347	IRF1	3659	P10914	ENSG00000125347_IRF1	-2.00393	4.64199	-15.3749	1.74703e-20	3.00621e-19	36.154
ENSG00000188001	TPRG1	285386	Q6ZUI0	ENSG00000188001_TPRG1	3.5404	-0.122435	15.3661	1.78859e-20	3.07467e-19	36.28
ENSG00000019144	PHLDB1	102466719	NA	ENSG00000019144_PHLDB1	1.64826	5.86226	15.3358	1.94005e-20	3.33173e-19	35.8747
ENSG00000128512	DOCK4	9732	H0Y7H7	ENSG00000128512_DOCK4	2.34874	4.3106	15.3321	1.95922e-20	3.36133e-19	36.106
ENSG00000203688	RP11-351J23.1	441178	NA	ENSG00000203688_RP11-351J23.1	-4.11891	-3.65159	-15.3294	1.97346e-20	3.3824e-19	35.5699
ENSG00000152931	PART1	25859	NA	ENSG00000152931_PART1	-3.79074	1.58814	-15.3232	2.00646e-20	3.43557e-19	36.2906
ENSG00000177508	IRX3	79191	P78415	ENSG00000177508_IRX3	-1.47398	5.43376	-15.3104	2.07622e-20	3.55151e-19	35.8769
ENSG00000122359	ANXA11	311	P50995	ENSG00000122359_ANXA11	-1.01403	7.52624	-15.3091	2.08348e-20	3.56e-19	35.7057
ENSG00000267530	AC006273.5	NA	NA	ENSG00000267530_AC006273.5	-3.27474	-2.0089	-15.3088	2.08529e-20	3.56e-19	35.8259
ENSG00000218336	TENM3	55714	NA	ENSG00000218336_TENM3	2.87742	5.52482	15.3019	2.12416e-20	3.61922e-19	35.8998
ENSG00000119630	PGF	5228	P49763	ENSG00000119630_PGF	3.32182	3.63744	15.2829	2.23538e-20	3.80497e-19	36.0956
ENSG00000111490	TBC1D30	23329	NA	ENSG00000111490_TBC1D30	-2.72756	2.07931	-15.2803	2.25092e-20	3.82768e-19	36.1897
ENSG00000142102	PGGHG	80162	NA	ENSG00000142102_PGGHG	-2.51778	2.96969	-15.2776	2.26747e-20	3.85203e-19	36.0781
ENSG00000176153	GPX2	2877	G3V323	ENSG00000176153_GPX2	3.98358	3.91351	15.2765	2.27397e-20	3.8593e-19	36.0994
ENSG00000270168	LA16c-380H5.3	NA	A0A0J9YXV3	ENSG00000270168_LA16c-380H5.3	-4.27718	0.0127263	-15.2756	2.27933e-20	3.86083e-19	36.0404
ENSG00000095321	CRAT	1384	P43155	ENSG00000095321_CRAT	-2.78857	3.46588	-15.2665	2.33573e-20	3.94863e-19	36.0551
ENSG00000014257	ACPP	55	P15309	ENSG00000014257_ACPP	-2.86716	1.50101	-15.2611	2.37035e-20	3.99547e-19	36.1346
ENSG00000124406	ATP8A1	10396	H0YAA1	ENSG00000124406_ATP8A1	-3.7156	1.33951	-15.2611	2.36995e-20	3.99547e-19	36.1267
ENSG00000156222	SLC28A1	9154	O00337	ENSG00000156222_SLC28A1	-5.53124	-2.60952	-15.2581	2.38921e-20	4.02335e-19	35.526
ENSG00000132031	MATN3	4148	O15232	ENSG00000132031_MATN3	2.2462	2.32499	15.2537	2.4177e-20	4.06737e-19	36.1036
ENSG00000065923	SLC9A7	84679	Q96T83	ENSG00000065923_SLC9A7	-1.46151	5.60642	-15.2495	2.44489e-20	4.10514e-19	35.6953
ENSG00000129657	SEC14L1	6397	NA	ENSG00000129657_SEC14L1	-1.08932	7.30971	-15.2487	2.45005e-20	4.10983e-19	35.5477
ENSG00000081985	IL12RB2	3595	Q99665	ENSG00000081985_IL12RB2	4.41615	-1.86994	15.2438	2.48302e-20	4.1534e-19	35.6577
ENSG00000188833	ENTPD8	377841	Q5MY95	ENSG00000188833_ENTPD8	-6.56454	-1.58851	-15.2437	2.48322e-20	4.1534e-19	35.5391
ENSG00000166473	PKD1L2	114780	NA	ENSG00000166473_PKD1L2	-4.75678	-0.436618	-15.2362	2.53397e-20	4.2342e-19	35.8736
ENSG00000171208	NETO2	81831	Q8NC67	ENSG00000171208_NETO2	1.23276	7.50083	15.2308	2.57089e-20	4.29175e-19	35.4932
ENSG00000168961	LGALS9	3965	O00182	ENSG00000168961_LGALS9	-5.16478	-0.387953	-15.2286	2.58626e-20	4.31326e-19	35.7829
ENSG00000241322	CDRT1	374286	K7ER72	ENSG00000241322_CDRT1	-4.10051	-0.880454	-15.2242	2.6171e-20	4.36048e-19	35.8173
ENSG00000254389	RHPN1-AS1	78998	NA	ENSG00000254389_RHPN1-AS1	-2.46551	-0.22811	-15.2203	2.64452e-20	4.39772e-19	35.898
ENSG00000233608	TWIST2	117581	Q8WVJ9	ENSG00000233608_TWIST2	2.71571	1.36613	15.2153	2.68068e-20	4.45357e-19	36.0125
ENSG00000153233	PTPRR	5801	Q15256	ENSG00000153233_PTPRR	-4.82364	-1.75109	-15.209	2.72679e-20	4.52584e-19	35.5986
ENSG00000099377	HSD3B7	80270	Q9H2F3	ENSG00000099377_HSD3B7	-1.69568	3.11579	-15.2005	2.78989e-20	4.62615e-19	35.8842
ENSG00000110987	BCL7A	605	Q4VC05	ENSG00000110987_BCL7A	1.0177	5.533	15.199	2.80096e-20	4.64007e-19	35.5492
ENSG00000137752	CASP1	834	H0YEC7	ENSG00000137752_CASP1	1.49247	5.38492	15.1925	2.85011e-20	4.71698e-19	35.5683
ENSG00000205488	CALML3-AS1	NA	NA	ENSG00000205488_CALML3-AS1	4.22039	2.33597	15.1881	2.88421e-20	4.76431e-19	35.9488
ENSG00000006047	YBX2	51087	Q9Y2T7	ENSG00000006047_YBX2	-5.08507	0.0464957	-15.1883	2.88262e-20	4.76431e-19	35.7593
ENSG00000116285	ERRFI1	54206	K7ENI4	ENSG00000116285_ERRFI1	-1.39477	8.61834	-15.1835	2.92002e-20	4.81887e-19	35.3393
ENSG00000143850	PLEKHA6	22874	Q9Y2H5	ENSG00000143850_PLEKHA6	-1.43647	4.97309	-15.1776	2.96754e-20	4.89263e-19	35.5611
ENSG00000134243	SORT1	6272	Q99523	ENSG00000134243_SORT1	-1.55446	7.27145	-15.1695	3.03242e-20	4.99485e-19	35.3436
ENSG00000178776	C5orf46	389336	NA	ENSG00000178776_C5orf46	-3.94734	1.65046	-15.169	3.03703e-20	4.99769e-19	35.8963
ENSG00000120708	TGFBI	7045	Q15582	ENSG00000120708_TGFBI	-2.79457	9.38124	-15.1617	3.09684e-20	5.09128e-19	35.278
ENSG00000155846	PPARGC1B	133522	Q86YN6	ENSG00000155846_PPARGC1B	1.50424	4.39536	15.1511	3.18712e-20	5.23473e-19	35.5796
ENSG00000010295	IFFO1	25900	NA	ENSG00000010295_IFFO1	3.53009	-0.0535083	15.145	3.23993e-20	5.31643e-19	35.7041
ENSG00000176170	SPHK1	8877	NA	ENSG00000176170_SPHK1	1.94802	5.95607	15.1416	3.26971e-20	5.36022e-19	35.3395
ENSG00000143590	EFNA3	1944	P52797	ENSG00000143590_EFNA3	-2.85896	2.46511	-15.1359	3.32039e-20	5.43816e-19	35.7988
ENSG00000233930	KRTAP5-AS1	338651	NA	ENSG00000233930_KRTAP5-AS1	-5.9587	-2.2799	-15.1175	3.49022e-20	5.7109e-19	35.2039
ENSG00000163898	LIPH	200879	Q8WWY8	ENSG00000163898_LIPH	-7.48064	1.5214	-15.0991	3.66726e-20	5.98365e-19	35.5048
ENSG00000006576	PHTF2	57157	Q8N3S3	ENSG00000006576_PHTF2	1.14472	5.39526	15.0987	3.67177e-20	5.98537e-19	35.2663
ENSG00000153904	DDAH1	23576	O94760	ENSG00000153904_DDAH1	-1.73464	5.08054	-15.095	3.70818e-20	6.03336e-19	35.3368
ENSG00000266936	CTC-215O4.4	NA	NA	ENSG00000266936_CTC-215O4.4	-3.50041	-3.68217	-15.0932	3.72717e-20	6.05857e-19	34.8804
ENSG00000226791	AC109826.1	NA	NA	ENSG00000226791_AC109826.1	-3.20488	-3.63826	-15.091	3.74942e-20	6.08903e-19	34.8692
ENSG00000151136	BTBD11	121551	A6QL63	ENSG00000151136_BTBD11	1.5291	5.22342	15.0797	3.8655e-20	6.27167e-19	35.282
ENSG00000250685	RP11-486L19.2	NA	NA	ENSG00000250685_RP11-486L19.2	4.73315	-1.16496	15.0721	3.94535e-20	6.39486e-19	35.2786
ENSG00000254417	ANO1-AS2	NA	NA	ENSG00000254417_ANO1-AS2	3.88665	-2.94724	15.0718	3.94881e-20	6.39486e-19	35.0611
ENSG00000188613	NANOS1	340719	Q8WY41	ENSG00000188613_NANOS1	-2.65515	3.82568	-15.0581	4.09783e-20	6.62381e-19	35.4568
ENSG00000167183	PRR15L	79170	Q9BU68	ENSG00000167183_PRR15L	-8.17791	0.904216	-15.0576	4.10392e-20	6.62746e-19	35.2615
ENSG00000160999	SH2B2	10603	A0A087X016	ENSG00000160999_SH2B2	-2.20253	0.555983	-15.054	4.14372e-20	6.68551e-19	35.5636
ENSG00000178031	ADAMTSL1	92949	NA	ENSG00000178031_ADAMTSL1	4.19933	-0.070759	15.043	4.27002e-20	6.87647e-19	35.4253
ENSG00000135905	DOCK10	55619	Q96BY6	ENSG00000135905_DOCK10	5.36195	1.21749	15.0311	4.40931e-20	7.08054e-19	35.4636
ENSG00000112759	SLC29A1	2030	Q99808	ENSG00000112759_SLC29A1	1.62959	6.3768	15.0308	4.41308e-20	7.08054e-19	35.016
ENSG00000259070	LINC00639	283547	NA	ENSG00000259070_LINC00639	-4.84191	0.597523	-15.0132	4.62965e-20	7.41428e-19	35.3603
ENSG00000176438	SYNE3	161176	Q6ZMZ3	ENSG00000176438_SYNE3	2.98196	0.92664	15.0045	4.73965e-20	7.58343e-19	35.4352
ENSG00000117009	KMO	8564	O15229	ENSG00000117009_KMO	-4.53758	2.08313	-14.9984	4.81839e-20	7.70232e-19	35.4397
ENSG00000102962	CCL22	6367	O00626	ENSG00000102962_CCL22	-6.58992	-0.71532	-14.9932	4.88689e-20	7.8046e-19	35.0301
ENSG00000112379	ARFGEF3	57221	Q5TH69	ENSG00000112379_ARFGEF3	-2.36701	5.42561	-14.97	5.20595e-20	8.27603e-19	34.9691
ENSG00000130487	KLHDC7B	113730	Q96G42	ENSG00000130487_KLHDC7B	-4.28049	-0.566711	-14.9683	5.23001e-20	8.30665e-19	35.1678
ENSG00000164418	GRIK2	2898	Q13002	ENSG00000164418_GRIK2	-5.1321	-0.930188	-14.9647	5.28094e-20	8.37225e-19	35.0724
ENSG00000188906	LRRK2	120892	C9JBF0	ENSG00000188906_LRRK2	3.58468	0.467997	14.961	5.33531e-20	8.44295e-19	35.2392
ENSG00000256462	RP11-116G8.5	NA	NA	ENSG00000256462_RP11-116G8.5	4.61316	1.79787	14.9543	5.43231e-20	8.5886e-19	35.3031
ENSG00000148288	GBGT1	26301	Q8N5D6	ENSG00000148288_GBGT1	-2.36133	1.14135	-14.9464	5.55042e-20	8.76734e-19	35.2989
ENSG00000176641	RNF152	220441	Q8N8N0	ENSG00000176641_RNF152	3.4631	5.27731	14.9271	5.85085e-20	9.22508e-19	34.939
ENSG00000111863	ADTRP	84830	H0Y9P4	ENSG00000111863_ADTRP	3.50957	3.62761	14.9249	5.88585e-20	9.27182e-19	35.1724
ENSG00000144063	MALL	7851	Q13021	ENSG00000144063_MALL	-2.17835	2.98546	-14.9221	5.93032e-20	9.33338e-19	35.1653
ENSG00000143537	ADAM15	8751	NA	ENSG00000143537_ADAM15	-1.00184	8.28251	-14.9168	6.01668e-20	9.46071e-19	34.6147
ENSG00000104774	MAN2B1	4125	NA	ENSG00000104774_MAN2B1	-1.19097	5.43039	-14.9074	6.17349e-20	9.69849e-19	34.7797
ENSG00000125850	OVOL2	58495	NA	ENSG00000125850_OVOL2	-1.57588	3.50857	-14.8974	6.34406e-20	9.94909e-19	34.9978
ENSG00000141854	MISP3	102466515	Q96FF7	ENSG00000141854_MISP3	-2.61745	0.741355	-14.8974	6.34449e-20	9.94909e-19	35.1388
ENSG00000183048	SLC25A10	1468	I3L3N9	ENSG00000183048_SLC25A10	-1.07776	3.11738	-14.8898	6.4779e-20	1.01491e-18	35.0195
ENSG00000172965	MIR4435-2HG	541471	NA	ENSG00000172965_MIR4435-2HG	-1.17792	4.8417	-14.888	6.50902e-20	1.01886e-18	34.7553
ENSG00000180801	ARSJ	79642	Q5FYB0	ENSG00000180801_ARSJ	1.16477	5.96867	14.8862	6.54051e-20	1.02287e-18	34.6406
ENSG00000170873	MTSS1	9788	O43312	ENSG00000170873_MTSS1	3.8068	4.14387	14.8805	6.64416e-20	1.03721e-18	35.0006
ENSG00000183347	GBP6	163351	Q6ZN66	ENSG00000183347_GBP6	3.27935	3.03727	14.8799	6.65447e-20	1.03788e-18	35.0841
ENSG00000162512	SDC3	9672	D3DPN2	ENSG00000162512_SDC3	1.53774	5.6227	14.8654	6.92321e-20	1.07581e-18	34.6444
ENSG00000168675	LDLRAD4	753	NA	ENSG00000168675_LDLRAD4	-6.34226	-1.05054	-14.8655	6.922e-20	1.07581e-18	34.6963
ENSG00000196396	PTPN1	5770	P18031	ENSG00000196396_PTPN1	1.07245	7.16505	14.8482	7.25612e-20	1.12263e-18	34.4592
ENSG00000106366	SERPINE1	5054	P05121	ENSG00000106366_SERPINE1	3.1101	7.66318	14.8449	7.32193e-20	1.1318e-18	34.461
ENSG00000086289	EPDR1	54749	D6RIH7	ENSG00000086289_EPDR1	4.19248	2.98013	14.8409	7.40283e-20	1.14328e-18	34.9776
ENSG00000074855	ANO8	57719	M0QYD2	ENSG00000074855_ANO8	-1.16926	4.3451	-14.8401	7.41888e-20	1.14474e-18	34.6839
ENSG00000167608	TMC4	147798	NA	ENSG00000167608_TMC4	-2.83448	3.93607	-14.836	7.50306e-20	1.1567e-18	34.8259
ENSG00000144730	IL17RD	54756	Q8NFM7	ENSG00000144730_IL17RD	2.17563	5.96215	14.8126	7.99895e-20	1.23205e-18	34.474
ENSG00000130508	PXDN	7837	Q92626	ENSG00000130508_PXDN	-2.00721	8.04309	-14.8122	8.007e-20	1.2322e-18	34.3431
ENSG00000114631	PODXL2	50512	Q9NZ53	ENSG00000114631_PODXL2	-2.59463	1.94905	-14.8109	8.03579e-20	1.23553e-18	34.9222
ENSG00000145777	TSLP	85480	A0A0C4DG43	ENSG00000145777_TSLP	3.0148	0.340182	14.8091	8.07683e-20	1.24074e-18	34.8492
ENSG00000142619	PADI3	51702	Q9ULW8	ENSG00000142619_PADI3	3.37013	0.222954	14.8057	8.15177e-20	1.25114e-18	34.8624
ENSG00000111799	COL12A1	1303	H0Y5N9	ENSG00000111799_COL12A1	1.88773	9.14431	14.7998	8.28449e-20	1.26926e-18	34.2814
ENSG00000163637	PRICKLE2	166336	Q7Z3G6	ENSG00000163637_PRICKLE2	1.29179	5.38012	14.7949	8.39744e-20	1.28543e-18	34.4545
ENSG00000103647	CORO2B	10391	Q9UQ03	ENSG00000103647_CORO2B	5.08785	1.22506	14.7844	8.6416e-20	1.31931e-18	34.8176
ENSG00000102781	KATNAL1	84056	Q9BW62	ENSG00000102781_KATNAL1	1.04225	4.94687	14.7847	8.63554e-20	1.31931e-18	34.4652
ENSG00000129465	RIPK3	11035	Q9Y572	ENSG00000129465_RIPK3	-3.92207	0.3789	-14.7754	8.85811e-20	1.35117e-18	34.7379
ENSG00000203780	FANK1	92565	A6NH44	ENSG00000203780_FANK1	-2.01863	2.25881	-14.7744	8.88291e-20	1.35376e-18	34.7987
ENSG00000124920	MYRF	745	NA	ENSG00000124920_MYRF	-3.83945	-0.527759	-14.7696	8.99887e-20	1.37023e-18	34.6315
ENSG00000089639	GMIP	51291	Q9P107	ENSG00000089639_GMIP	-1.05415	4.82436	-14.7692	9.00891e-20	1.37056e-18	34.4446
ENSG00000137266	SLC22A23	63027	C9J4Z0	ENSG00000137266_SLC22A23	2.15629	5.27471	14.758	9.29139e-20	1.41105e-18	34.3984
ENSG00000118971	CCND2	894	P30279	ENSG00000118971_CCND2	3.1733	7.63012	14.7532	9.41415e-20	1.42845e-18	34.2131
ENSG00000178718	RPP25	54913	Q9BUL9	ENSG00000178718_RPP25	-1.95283	2.48703	-14.7507	9.48006e-20	1.43593e-18	34.7166
ENSG00000186832	KRT16	3868	P08779	ENSG00000186832_KRT16	-2.63994	8.85442	-14.7407	9.74398e-20	1.47462e-18	34.1236
ENSG00000172137	CALB2	794	P22676	ENSG00000172137_CALB2	-5.32339	3.77313	-14.7271	1.0114e-19	1.52928e-18	34.66
ENSG00000204634	TBC1D8	11138	O95759	ENSG00000204634_TBC1D8	-1.77808	5.16164	-14.7214	1.02737e-19	1.55207e-18	34.2794
ENSG00000005469	CROT	54677	Q9UKG9	ENSG00000005469_CROT	1.13143	4.68542	14.7024	1.08259e-19	1.63407e-18	34.2847
ENSG00000137878	GCOM1	145781	NA	ENSG00000137878_GCOM1	-2.14787	-0.0670781	-14.6996	1.09083e-19	1.64507e-18	34.5558
ENSG00000198189	HSD17B11	51170	Q8NBQ5	ENSG00000198189_HSD17B11	2.97563	1.07949	14.693	1.1108e-19	1.67374e-18	34.6054
ENSG00000233493	TMEM238	388564	C9JI98	ENSG00000233493_TMEM238	-1.37263	2.20837	-14.6905	1.11844e-19	1.68378e-18	34.5541
ENSG00000074181	NOTCH3	4854	Q9UM47	ENSG00000074181_NOTCH3	-2.78995	7.30617	-14.6808	1.14878e-19	1.72645e-18	34.0125
ENSG00000105929	ATP6V0A4	50617	Q9HBG4	ENSG00000105929_ATP6V0A4	-5.64635	2.22274	-14.6566	1.22797e-19	1.83751e-18	34.4992
ENSG00000012779	ALOX5	240	P09917	ENSG00000012779_ALOX5	-7.26349	0.333208	-14.6539	1.23729e-19	1.84985e-18	34.2293
ENSG00000170075	GPR37L1	9283	O60883	ENSG00000170075_GPR37L1	-4.05217	-1.75117	-14.6524	1.24238e-19	1.85586e-18	34.1331
ENSG00000179913	B3GNT3	10331	M0R199	ENSG00000179913_B3GNT3	-1.06696	5.46595	-14.6509	1.24743e-19	1.86179e-18	34.0427
ENSG00000126878	AIF1L	83543	H7C605	ENSG00000126878_AIF1L	-2.0958	5.41201	-14.6501	1.25033e-19	1.86452e-18	34.0762
ENSG00000065534	MYLK	4638	Q15746	ENSG00000065534_MYLK	2.02055	6.96265	14.6443	1.2703e-19	1.89267e-18	33.9247
ENSG00000113742	CPEB4	80315	Q17RY0	ENSG00000113742_CPEB4	-1.03261	5.74893	-14.6328	1.31138e-19	1.94885e-18	33.9463
ENSG00000128655	PDE11A	50940	Q9HCR9	ENSG00000128655_PDE11A	-3.05621	-0.640841	-14.6331	1.31044e-19	1.94885e-18	34.3097
ENSG00000197647	ZNF433	163059	Q8N7K0	ENSG00000197647_ZNF433	-2.22747	1.16185	-14.6218	1.35166e-19	2.00697e-18	34.4151
ENSG00000101470	TNNC2	7125	P02585	ENSG00000101470_TNNC2	-3.95487	-2.42583	-14.6215	1.35281e-19	2.00697e-18	33.9725
ENSG00000087494	PTHLH	5744	P12272	ENSG00000087494_PTHLH	2.11518	7.46521	14.6023	1.42667e-19	2.11474e-18	33.7686
ENSG00000184584	TMEM173	340061	NA	ENSG00000184584_TMEM173	1.61899	4.18732	14.6004	1.43391e-19	2.12366e-18	34.0827
ENSG00000106003	LFNG	3955	Q8NES3	ENSG00000106003_LFNG	2.16609	4.69271	14.5962	1.45089e-19	2.14697e-18	34.0421
ENSG00000197506	SLC28A3	64078	Q9HAS3	ENSG00000197506_SLC28A3	-8.22111	1.28305	-14.5924	1.46621e-19	2.16594e-18	34.1028
ENSG00000255248	MIR100HG	399959	NA	ENSG00000255248_MIR100HG	2.30649	4.62833	14.5897	1.47733e-19	2.18051e-18	34.0246
ENSG00000273415	RP11-702B10.2	NA	NA	ENSG00000273415_RP11-702B10.2	-4.70699	-1.73985	-14.5808	1.51413e-19	2.23102e-18	33.9909
ENSG00000168269	FOXI1	2299	Q12951	ENSG00000168269_FOXI1	-8.14775	0.860659	-14.5771	1.52962e-19	2.25194e-18	33.9922
ENSG00000146006	LRRTM2	26045	O43300	ENSG00000146006_LRRTM2	3.52149	0.0929764	14.5555	1.62387e-19	2.38664e-18	34.1374
ENSG00000230498	RP4-564M11.2	NA	NA	ENSG00000230498_RP4-564M11.2	-3.53193	-3.16793	-14.5551	1.6254e-19	2.38686e-18	33.6582
ENSG00000229124	VIM-AS1	100507347	NA	ENSG00000229124_VIM-AS1	1.58448	3.32858	14.5495	1.65095e-19	2.42233e-18	34.0707
ENSG00000183248	PRR36	80164	Q9H6K5	ENSG00000183248_PRR36	-5.18425	-0.173108	-14.5398	1.69606e-19	2.4864e-18	34.0153
ENSG00000146054	TRIM7	81786	Q9C029	ENSG00000146054_TRIM7	1.37174	4.54433	14.5292	1.74668e-19	2.55628e-18	33.8155
ENSG00000013392	RWDD2A	112611	Q9UIY3	ENSG00000013392_RWDD2A	-1.11726	2.09865	-14.5278	1.7535e-19	2.56411e-18	34.1189
ENSG00000273478	RP11-465N4.5	NA	NA	ENSG00000273478_RP11-465N4.5	-3.33479	-0.806831	-14.5267	1.75873e-19	2.56959e-18	33.9639
ENSG00000258929	NA	NA	NA	ENSG00000258929_NA	-1.56415	1.35629	-14.5236	1.77374e-19	2.58663e-18	34.1481
ENSG00000180861	LINC01559	NA	NA	ENSG00000180861_LINC01559	-6.93016	-1.44864	-14.5234	1.77487e-19	2.58663e-18	33.7452
ENSG00000143147	GPR161	23432	Q8N6U8	ENSG00000143147_GPR161	1.17657	4.11423	14.5226	1.77879e-19	2.59015e-18	33.8762
ENSG00000237943	PRKCQ-AS1	NA	NA	ENSG00000237943_PRKCQ-AS1	1.61602	2.81902	14.5194	1.79474e-19	2.61119e-18	34.0365
ENSG00000260944	FOXC2-AS1	103752587	NA	ENSG00000260944_FOXC2-AS1	4.1687	-2.18049	14.5185	1.7992e-19	2.61548e-18	33.7243
ENSG00000244067	GSTA2	2939	P09210	ENSG00000244067_GSTA2	-3.7517	-2.7459	-14.5148	1.81783e-19	2.64035e-18	33.6651
ENSG00000211584	SLC48A1	55652	F8VQX9	ENSG00000211584_SLC48A1	1.53529	4.46981	14.4992	1.89831e-19	2.75493e-18	33.7577
ENSG00000253408	RP11-231D20.2	101929897	NA	ENSG00000253408_RP11-231D20.2	3.1043	-1.69666	14.4953	1.919e-19	2.78263e-18	33.736
ENSG00000156966	B3GNT7	93010	Q8NFL0	ENSG00000156966_B3GNT7	-3.24694	1.93923	-14.488	1.95823e-19	2.83477e-18	34.0489
ENSG00000101773	RBBP8	100616139	A0A140TA82	ENSG00000101773_RBBP8	1.4636	7.86265	14.4786	2.00981e-19	2.90701e-18	33.4052
ENSG00000170293	CMTM8	152189	Q8IZV2	ENSG00000170293_CMTM8	-1.52677	2.0743	-14.4743	2.03403e-19	2.93935e-18	33.9822
ENSG00000135919	SERPINE2	5270	P07093	ENSG00000135919_SERPINE2	2.22154	7.43853	14.4703	2.0565e-19	2.96465e-18	33.401
ENSG00000168016	TRANK1	9881	O15050	ENSG00000168016_TRANK1	-3.36609	1.6009	-14.4705	2.05565e-19	2.96465e-18	34.0026
ENSG00000196562	SULF2	55959	NA	ENSG00000196562_SULF2	-1.38209	8.24784	-14.4641	2.09264e-19	3.01174e-18	33.3574
ENSG00000268812	RP1-102K2.8	91370	NA	ENSG00000268812_RP1-102K2.8	-3.93802	-0.607535	-14.462	2.10473e-19	3.02662e-18	33.8439
ENSG00000126947	ARMCX1	51309	Q9P291	ENSG00000126947_ARMCX1	1.14028	4.13276	14.456	2.13988e-19	3.07207e-18	33.6935
ENSG00000137338	PGBD1	84547	Q96JS3	ENSG00000137338_PGBD1	1.06486	3.04444	14.4501	2.17528e-19	3.1203e-18	33.8067
ENSG00000088836	SLC4A11	83959	Q8NBS3	ENSG00000088836_SLC4A11	-1.73914	5.35858	-14.4479	2.18898e-19	3.13735e-18	33.489
ENSG00000131873	CHSY1	22856	Q86X52	ENSG00000131873_CHSY1	1.02328	6.89435	14.4348	2.26995e-19	3.24535e-18	33.3136
ENSG00000187527	ATP13A5	344905	Q4VNC0	ENSG00000187527_ATP13A5	-6.71391	-1.80487	-14.4277	2.31568e-19	3.308e-18	33.4341
ENSG00000259120	SMIM6	100130933	P0DI80	ENSG00000259120_SMIM6	-3.62758	-3.57805	-14.426	2.32669e-19	3.32099e-18	33.22
ENSG00000176920	FUT2	2524	E7EW73	ENSG00000176920_FUT2	-6.99055	1.98767	-14.4254	2.33049e-19	3.32368e-18	33.8057
ENSG00000231632	NA	NA	NA	ENSG00000231632_NA	-3.75021	-3.53524	-14.4199	2.36611e-19	3.3634e-18	33.2591
ENSG00000165185	KIAA1958	158405	Q8N8K9	ENSG00000165185_KIAA1958	-1.0444	3.25892	-14.4169	2.38605e-19	3.38897e-18	33.6685
ENSG00000025708	TYMP	1890	P19971	ENSG00000025708_TYMP	-2.21995	4.63	-14.4139	2.40598e-19	3.41448e-18	33.5173
ENSG00000105255	FSD1	79187	Q9BTV5	ENSG00000105255_FSD1	4.34714	-1.60299	14.4097	2.43426e-19	3.45179e-18	33.5014
ENSG00000113657	DPYSL3	1809	Q14195	ENSG00000113657_DPYSL3	2.17847	4.8451	14.4089	2.44008e-19	3.45439e-18	33.4956
ENSG00000006534	ALDH3B1	221	P43353	ENSG00000006534_ALDH3B1	-1.8719	3.98327	-14.4058	2.46112e-19	3.48133e-18	33.592
ENSG00000140937	CDH11	1009	P55287	ENSG00000140937_CDH11	5.00826	3.15004	14.3981	2.51463e-19	3.55412e-18	33.7869
ENSG00000169902	TPST1	8460	O60507	ENSG00000169902_TPST1	1.14693	5.05195	14.3959	2.52971e-19	3.57252e-18	33.3853
ENSG00000101955	SRPX	8406	P78539	ENSG00000101955_SRPX	2.17532	5.40121	14.3928	2.55199e-19	3.60105e-18	33.3822
ENSG00000155254	MARVELD1	83742	NA	ENSG00000155254_MARVELD1	1.12935	6.86015	14.3905	2.56848e-19	3.62137e-18	33.1904
ENSG00000110756	HPS5	11234	NA	ENSG00000110756_HPS5	-1.03865	6.73609	-14.3794	2.64923e-19	3.73219e-18	33.1665
ENSG00000164746	C7orf57	136288	C9JQZ6	ENSG00000164746_C7orf57	3.57138	-1.45353	14.3754	2.67886e-19	3.76969e-18	33.4772
ENSG00000133816	MICAL2	9645	E9PRE0	ENSG00000133816_MICAL2	1.4317	7.65208	14.3752	2.6802e-19	3.76969e-18	33.1151
ENSG00000125648	SLC25A23	79085	M0R2F3	ENSG00000125648_SLC25A23	-1.2466	5.65499	-14.3742	2.68826e-19	3.77795e-18	33.2517
ENSG00000141404	GNAL	2774	P38405	ENSG00000141404_GNAL	3.54716	4.35135	14.3602	2.79484e-19	3.92137e-18	33.4878
ENSG00000196136	SERPINA3	NA	NA	ENSG00000196136_SERPINA3	-6.3651	1.12565	-14.3426	2.93579e-19	4.1158e-18	33.5359
ENSG00000177614	PGBD5	79605	A0A0A0MS21	ENSG00000177614_PGBD5	-6.51985	-1.02236	-14.3397	2.95983e-19	4.14615e-18	33.3297
ENSG00000111728	ST8SIA1	6489	NA	ENSG00000111728_ST8SIA1	-6.34017	-0.832747	-14.3383	2.97118e-19	4.1587e-18	33.3635
ENSG00000172183	ISG20	3669	Q96AZ6	ENSG00000172183_ISG20	-2.5984	2.54882	-14.3369	2.98283e-19	4.17163e-18	33.5871
ENSG00000196154	S100A4	6275	P26447	ENSG00000196154_S100A4	-3.11153	3.78177	-14.3336	3.0107e-19	4.20721e-18	33.4669
ENSG00000021300	PLEKHB1	58473	Q9UF11	ENSG00000021300_PLEKHB1	-5.64426	1.78648	-14.3329	3.01681e-19	4.21235e-18	33.5907
ENSG00000158292	GPR153	387509	Q6NV75	ENSG00000158292_GPR153	1.52939	5.4457	14.3319	3.02478e-19	4.22008e-18	33.1596
ENSG00000214128	TMEM213	155006	A2RRL7	ENSG00000214128_TMEM213	-5.73027	-1.6399	-14.3268	3.06897e-19	4.27485e-18	33.2456
ENSG00000260912	RP11-363E7.4	NA	NA	ENSG00000260912_RP11-363E7.4	1.68638	2.1616	14.3218	3.11144e-19	4.33053e-18	33.5602
ENSG00000121380	BCL2L14	79370	Q9BZR8	ENSG00000121380_BCL2L14	-5.01218	-2.63175	-14.3167	3.15621e-19	4.3893e-18	33.1118
ENSG00000173221	GLRX	2745	P35754	ENSG00000173221_GLRX	-2.65316	3.27209	-14.3113	3.20443e-19	4.45279e-18	33.4373
ENSG00000132274	TRIM22	10346	Q8IYM9	ENSG00000132274_TRIM22	-1.38592	6.31174	-14.2949	3.35528e-19	4.65868e-18	32.9609
ENSG00000203722	RAET1G	353091	Q6H3X3	ENSG00000203722_RAET1G	2.69818	2.25655	14.2889	3.41225e-19	4.73399e-18	33.4882
ENSG00000134769	DTNA	1837	Q9Y4J8	ENSG00000134769_DTNA	-2.21953	3.26887	-14.2832	3.46729e-19	4.80649e-18	33.3213
ENSG00000163545	NUAK2	81788	Q9H093	ENSG00000163545_NUAK2	2.69286	2.64695	14.2728	3.56959e-19	4.9404e-18	33.3968
ENSG00000114019	AMOTL2	51421	Q9Y2J4	ENSG00000114019_AMOTL2	-1.2051	6.83683	-14.2609	3.69076e-19	5.09996e-18	32.816
ENSG00000205221	VIT	5212	Q6UXI7	ENSG00000205221_VIT	4.69413	-2.23206	14.26	3.70015e-19	5.1048e-18	33.0742
ENSG00000162542	TMCO4	255104	Q5TGY1	ENSG00000162542_TMCO4	-1.28369	3.67628	-14.2602	3.69769e-19	5.1048e-18	33.2221
ENSG00000070814	TCOF1	6949	Q13428	ENSG00000070814_TCOF1	1.32194	7.55044	14.255	3.7519e-19	5.17206e-18	32.7771
ENSG00000141524	TMC6	11322	Q7Z403	ENSG00000141524_TMC6	-2.08877	4.78937	-14.2318	4.00436e-19	5.50695e-18	32.9918
ENSG00000147614	ATP6V0D2	245972	E5RHJ7	ENSG00000147614_ATP6V0D2	-4.70058	-2.62859	-14.2259	4.07136e-19	5.59466e-18	32.8188
ENSG00000147485	PXDNL	137902	K4DIA6	ENSG00000147485_PXDNL	-4.38731	-2.24161	-14.223	4.10423e-19	5.63535e-18	33.005
ENSG00000262152	LA16c-380H5.1	NA	NA	ENSG00000262152_LA16c-380H5.1	-4.69309	-1.47626	-14.2137	4.21335e-19	5.78059e-18	33.0615
ENSG00000197496	SLC2A10	81031	O95528	ENSG00000197496_SLC2A10	-4.43893	1.05704	-14.21	4.25761e-19	5.83208e-18	33.2399
ENSG00000078596	ITM2A	9452	O43736	ENSG00000078596_ITM2A	4.48343	1.50539	14.2076	4.28648e-19	5.86699e-18	33.2689
ENSG00000103089	FA2H	79152	NA	ENSG00000103089_FA2H	-3.59602	-0.034605	-14.2062	4.30373e-19	5.88595e-18	33.1775
ENSG00000112796	ENPP5	59084	Q9UJA9	ENSG00000112796_ENPP5	-1.92168	3.25791	-14.2049	4.31954e-19	5.90291e-18	33.1185
ENSG00000159899	NPR2	4882	P20594	ENSG00000159899_NPR2	1.54146	2.6626	14.2041	4.32887e-19	5.911e-18	33.1711
ENSG00000174669	SLC29A2	3177	G5E943	ENSG00000174669_SLC29A2	-1.48564	4.49324	-14.2027	4.34585e-19	5.92952e-18	32.8962
ENSG00000272141	RP11-465B22.8	NA	NA	ENSG00000272141_RP11-465B22.8	-4.12212	-0.724057	-14.1937	4.45708e-19	6.07173e-18	33.1248
ENSG00000115525	ST3GAL5	8869	Q9UNP4	ENSG00000115525_ST3GAL5	4.15238	2.03983	14.1929	4.46771e-19	6.07665e-18	33.234
ENSG00000204420	C6orf25	80739	NA	ENSG00000204420_C6orf25	-3.74371	-2.24966	-14.193	4.46577e-19	6.07665e-18	32.8575
ENSG00000196684	HSH2D	84941	Q96JZ2	ENSG00000196684_HSH2D	-5.20136	-1.2894	-14.1897	4.50802e-19	6.12666e-18	32.9375
ENSG00000053108	FSTL4	23105	Q6MZW2	ENSG00000053108_FSTL4	4.0496	-1.63866	14.1883	4.52523e-19	6.14523e-18	32.8783
ENSG00000088726	TMEM40	55287	Q8WWA1	ENSG00000088726_TMEM40	1.93338	4.59655	14.1851	4.56686e-19	6.19206e-18	32.8811
ENSG00000133121	STARD13	90627	Q9Y3M8	ENSG00000133121_STARD13	-1.31262	4.74992	-14.1757	4.68814e-19	6.35153e-18	32.7846
ENSG00000152061	RABGAP1L	9910	Q5R372	ENSG00000152061_RABGAP1L	-1.26755	5.43122	-14.1528	5.00082e-19	6.7593e-18	32.6498
ENSG00000023909	GCLM	2730	P48507	ENSG00000023909_GCLM	1.54946	7.02303	14.1508	5.02984e-19	6.79322e-18	32.5033
ENSG00000138193	PLCE1	51196	Q9P212	ENSG00000138193_PLCE1	-4.85774	1.49401	-14.1486	5.06013e-19	6.82881e-18	33.0924
ENSG00000137474	MYO7A	4647	Q13402	ENSG00000137474_MYO7A	1.57611	2.39875	14.147	5.08317e-19	6.85457e-18	33.0443
ENSG00000114547	ROPN1B	152015	Q9BZX4	ENSG00000114547_ROPN1B	-5.62956	-1.27755	-14.1453	5.10814e-19	6.88288e-18	32.8261
ENSG00000160183	TMPRSS3	64699	NA	ENSG00000160183_TMPRSS3	-7.60792	0.441288	-14.1425	5.14855e-19	6.93194e-18	32.8454
ENSG00000147100	SLC16A2	6567	P36021	ENSG00000147100_SLC16A2	1.13976	5.96333	14.1415	5.16335e-19	6.94647e-18	32.5569
ENSG00000102359	SRPX2	27286	O60687	ENSG00000102359_SRPX2	-1.5724	4.75744	-14.1385	5.20623e-19	6.99872e-18	32.7098
ENSG00000268307	CTD-2619J13.13	NA	NA	ENSG00000268307_CTD-2619J13.13	-4.55113	-2.04056	-14.1377	5.21887e-19	7.01028e-18	32.6792
ENSG00000185156	MFSD6L	162387	Q8IWD5	ENSG00000185156_MFSD6L	-4.80642	-2.87797	-14.1349	5.25944e-19	7.0593e-18	32.5805
ENSG00000134258	VTCN1	79679	Q5T2L0	ENSG00000134258_VTCN1	-8.2611	3.61568	-14.1345	5.26623e-19	7.06295e-18	33.0616
ENSG00000117507	FMO6P	388714	NA	ENSG00000117507_FMO6P	-3.48352	-4.14632	-14.1321	5.30225e-19	7.09478e-18	32.3895
ENSG00000117983	MUC5B	727897	NA	ENSG00000117983_MUC5B	-9.22068	1.43519	-14.1193	5.49604e-19	7.33709e-18	32.815
ENSG00000159433	STARD9	57519	NA	ENSG00000159433_STARD9	2.02451	2.48305	14.1176	5.52282e-19	7.36716e-18	32.9362
ENSG00000141968	VAV1	7409	A0A0A0MR07	ENSG00000141968_VAV1	-5.58555	-1.54305	-14.1126	5.60224e-19	7.46736e-18	32.6932
ENSG00000182010	RTKN2	219790	Q5SVY4	ENSG00000182010_RTKN2	-1.84743	4.45344	-14.099	5.82128e-19	7.7474e-18	32.5973
ENSG00000172382	PRSS27	83886	Q9BQR3	ENSG00000172382_PRSS27	-5.68383	0.744348	-14.0901	5.96888e-19	7.93775e-18	32.8573
ENSG00000156463	SH3RF2	153769	Q8TEC5	ENSG00000156463_SH3RF2	1.42964	5.89303	14.077	6.19447e-19	8.21882e-18	32.3781
ENSG00000143036	SLC44A3	126969	Q8N4M1	ENSG00000143036_SLC44A3	-2.24504	3.25071	-14.0757	6.21725e-19	8.23643e-18	32.7895
ENSG00000176842	IRX5	10265	P78411	ENSG00000176842_IRX5	-1.16811	5.4748	-14.0701	6.31569e-19	8.35407e-18	32.4037
ENSG00000206075	SERPINB5	5268	P36952	ENSG00000206075_SERPINB5	1.28217	10.0712	14.0627	6.44904e-19	8.52395e-18	32.1963
ENSG00000258130	RP11-347C12.3	NA	F8VWA3	ENSG00000258130_RP11-347C12.3	-3.17456	-3.83446	-14.0578	6.54071e-19	8.63852e-18	32.2173
ENSG00000151012	SLC7A11	23657	Q9UPY5	ENSG00000151012_SLC7A11	2.27611	5.88605	14.054	6.6099e-19	8.72325e-18	32.3455
ENSG00000137573	SULF1	23213	E9PI06	ENSG00000137573_SULF1	5.04575	1.62878	14.0515	6.65806e-19	8.78013e-18	32.835
ENSG00000121281	ADCY7	113	I3L3Q5	ENSG00000121281_ADCY7	-1.62959	4.81192	-14.051	6.66704e-19	8.78529e-18	32.4328
ENSG00000165621	OXGR1	27199	Q96P68	ENSG00000165621_OXGR1	-5.3758	-2.40196	-14.0432	6.81626e-19	8.95468e-18	32.4197
ENSG00000162302	RPS6KA4	8986	E9PJN1	ENSG00000162302_RPS6KA4	1.15183	6.81812	14.0403	6.87207e-19	9.02116e-18	32.1904
ENSG00000110328	GALNT18	374378	Q6P9A2	ENSG00000110328_GALNT18	1.07699	4.81303	14.0371	6.93522e-19	9.09716e-18	32.3964
ENSG00000065371	ROPN1	54763	Q9HAT0	ENSG00000065371_ROPN1	-4.91183	-1.00182	-14.0272	7.13222e-19	9.34143e-18	32.5715
ENSG00000181773	GPR3	2827	P46089	ENSG00000181773_GPR3	1.86529	0.78351	14.0261	7.15323e-19	9.36187e-18	32.768
ENSG00000183831	ANKRD45	339416	Q5TZF3	ENSG00000183831_ANKRD45	4.21676	-2.56251	14.0136	7.41185e-19	9.69303e-18	32.2973
ENSG00000174171	RP11-23P13.6	NA	NA	ENSG00000174171_RP11-23P13.6	-3.88075	1.81788	-14.0046	7.60386e-19	9.93663e-18	32.7065
ENSG00000272502	RP11-713M15.2	NA	NA	ENSG00000272502_RP11-713M15.2	-3.38303	-3.56037	-13.9965	7.78133e-19	1.01609e-17	32.0898
ENSG00000138271	GPR87	53836	NA	ENSG00000138271_GPR87	1.00201	6.28225	13.9928	7.86346e-19	1.02604e-17	32.0872
ENSG00000225950	NTF4	4909	P34130	ENSG00000225950_NTF4	2.48682	1.38874	13.9881	7.96745e-19	1.03883e-17	32.6586
ENSG00000189377	CXCL17	284340	Q6UXB2	ENSG00000189377_CXCL17	-7.48199	-0.815879	-13.9828	8.08819e-19	1.05298e-17	32.3174
ENSG00000114450	GNB4	59345	Q9HAV0	ENSG00000114450_GNB4	1.05455	6.23563	13.982	8.10666e-19	1.0546e-17	32.0638
ENSG00000237697	NA	NA	NA	ENSG00000237697_NA	-3.48166	-2.97879	-13.9663	8.47696e-19	1.10111e-17	32.221
ENSG00000180787	ZFP3	124961	Q96NJ6	ENSG00000180787_ZFP3	-1.55737	2.45131	-13.9634	8.54776e-19	1.10948e-17	32.517
ENSG00000171310	CHST11	50515	NA	ENSG00000171310_CHST11	1.40666	5.6983	13.9622	8.57618e-19	1.11234e-17	32.0829
ENSG00000106688	SLC1A1	6505	P43005	ENSG00000106688_SLC1A1	-3.81779	2.46318	-13.9442	9.02686e-19	1.16642e-17	32.5164
ENSG00000205593	DENND6B	414918	Q8NEG7	ENSG00000205593_DENND6B	-2.53757	0.544526	-13.9377	9.19582e-19	1.18737e-17	32.5101
ENSG00000117834	SLC5A9	200010	F8WD86	ENSG00000117834_SLC5A9	-4.54891	-3.0392	-13.9329	9.32127e-19	1.20267e-17	32.0646
ENSG00000179826	MRGPRX3	117195	Q96LB0	ENSG00000179826_MRGPRX3	3.64038	2.76895	13.9171	9.74876e-19	1.25689e-17	32.4333
ENSG00000061337	LZTS1	11178	Q9Y250	ENSG00000061337_LZTS1	5.52255	1.85669	13.9137	9.84416e-19	1.26825e-17	32.4383
ENSG00000138738	PRDM5	11107	NA	ENSG00000138738_PRDM5	1.19126	3.0763	13.9028	1.01538e-18	1.30523e-17	32.2535
ENSG00000254148	NA	NA	NA	ENSG00000254148_NA	-6.3389	-0.0759392	-13.9013	1.0199e-18	1.31007e-17	32.235
ENSG00000108679	LGALS3BP	3959	K7EJD3	ENSG00000108679_LGALS3BP	-1.14817	8.00689	-13.9004	1.02256e-18	1.31251e-17	31.7542
ENSG00000235027	AC068580.6	NA	NA	ENSG00000235027_AC068580.6	-2.26287	0.790301	-13.8975	1.03093e-18	1.322e-17	32.3871
ENSG00000150893	FREM2	341640	Q5SZK8	ENSG00000150893_FREM2	-4.54399	2.37142	-13.8973	1.03148e-18	1.322e-17	32.4009
ENSG00000176945	MUC20	200958	Q8N307	ENSG00000176945_MUC20	-5.73805	-0.0504148	-13.8965	1.03377e-18	1.32395e-17	32.2633
ENSG00000235423	RP11-282O18.3	NA	NA	ENSG00000235423_RP11-282O18.3	-1.00843	3.17225	-13.8851	1.0681e-18	1.36692e-17	32.2056
ENSG00000157557	ETS2	2114	P15036	ENSG00000157557_ETS2	1.15914	6.37652	13.8736	1.10363e-18	1.41135e-17	31.7418
ENSG00000151468	CCDC3	83643	Q9BQI4	ENSG00000151468_CCDC3	5.35981	1.28563	13.8706	1.11298e-18	1.42226e-17	32.3032
ENSG00000250305	KIAA1456	57604	F6XBY7	ENSG00000250305_KIAA1456	4.07195	-1.28292	13.8626	1.13887e-18	1.45212e-17	32.1243
ENSG00000105963	ADAP1	11033	O75689	ENSG00000105963_ADAP1	-1.57938	2.42112	-13.8536	1.16841e-18	1.48869e-17	32.2045
ENSG00000204421	LY6G6C	80740	G3V1A8	ENSG00000204421_LY6G6C	-4.10398	-1.946	-13.8501	1.18004e-18	1.5024e-17	31.966
ENSG00000102243	VGLL1	51442	Q99990	ENSG00000102243_VGLL1	-7.63855	1.259	-13.8248	1.26871e-18	1.61056e-17	32.0561
ENSG00000198208	RPS6KL1	83694	NA	ENSG00000198208_RPS6KL1	-2.08001	2.18678	-13.8228	1.27586e-18	1.61728e-17	32.1129
ENSG00000147119	CHST7	56548	Q9NS84	ENSG00000147119_CHST7	1.55864	2.48162	13.8156	1.30244e-18	1.64734e-17	32.0976
ENSG00000071282	LMCD1	29995	Q9NZU5	ENSG00000071282_LMCD1	-3.29213	2.22504	-13.8128	1.31295e-18	1.65943e-17	32.1334
ENSG00000166780	C16orf45	89927	Q96MC5	ENSG00000166780_C16orf45	3.53034	-0.0508797	13.8108	1.32062e-18	1.66791e-17	32.0991
ENSG00000171587	DSCAM	1826	O60469	ENSG00000171587_DSCAM	2.94265	2.19177	13.8101	1.32297e-18	1.66966e-17	32.1326
ENSG00000122824	NUDT10	170685	Q8NFP7	ENSG00000122824_NUDT10	4.8644	-0.526791	13.7956	1.37931e-18	1.7395e-17	31.9898
ENSG00000130598	TNNI2	7136	P48788	ENSG00000130598_TNNI2	2.31324	3.40878	13.7897	1.40248e-18	1.76742e-17	31.9059
ENSG00000115355	CCDC88A	55704	Q3V6T2	ENSG00000115355_CCDC88A	1.23539	6.66177	13.7888	1.40612e-18	1.77073e-17	31.4761
ENSG00000185477	GPRIN3	285513	Q6ZVF9	ENSG00000185477_GPRIN3	-5.80351	-0.0746974	-13.786	1.41758e-18	1.78387e-17	31.9429
ENSG00000110195	FOLR1	2348	P15328	ENSG00000110195_FOLR1	-3.84424	1.72345	-13.7857	1.41888e-18	1.78421e-17	32.0901
ENSG00000147883	CDKN2B	1030	P42772	ENSG00000147883_CDKN2B	-2.17643	5.74804	-13.7714	1.47828e-18	1.85621e-17	31.5492
ENSG00000172243	CLEC7A	64581	Q9BXN2	ENSG00000172243_CLEC7A	-5.17432	0.737974	-13.7658	1.50214e-18	1.88479e-17	31.9777
ENSG00000185070	FLRT2	23768	O43155	ENSG00000185070_FLRT2	3.01094	5.16272	13.7642	1.50895e-18	1.89197e-17	31.6633
ENSG00000245904	RP11-796E2.4	NA	NA	ENSG00000245904_RP11-796E2.4	-3.2016	-0.0391305	-13.762	1.51832e-18	1.90235e-17	31.9494
ENSG00000125354	2020-09-06	23157	Q14141	ENSG00000125354_SEPT6	-1.24799	4.57051	-13.7509	1.56769e-18	1.96023e-17	31.5995
ENSG00000165125	TRPV6	55503	Q9H1D0	ENSG00000165125_TRPV6	-6.26702	0.136043	-13.7508	1.56791e-18	1.96023e-17	31.8598
ENSG00000144642	RBMS3	27303	NA	ENSG00000144642_RBMS3	1.97468	3.17629	13.7473	1.58376e-18	1.97861e-17	31.8239
ENSG00000146955	RAB19	401409	C9JJQ5	ENSG00000146955_RAB19	-3.67366	-1.36424	-13.7408	1.61367e-18	2.01308e-17	31.7662
ENSG00000104219	ZDHHC2	51201	Q9UIJ5	ENSG00000104219_ZDHHC2	-1.06499	5.33406	-13.7344	1.64368e-18	2.04904e-17	31.4382
ENSG00000139636	LMBR1L	55716	Q6UX01	ENSG00000139636_LMBR1L	-1.31927	3.81584	-13.7311	1.65923e-18	2.06545e-17	31.6432
ENSG00000154080	CHST9	83539	Q7L1S5	ENSG00000154080_CHST9	-4.53467	-2.02798	-13.7244	1.69158e-18	2.1027e-17	31.6231
ENSG00000118777	ABCG2	9429	Q9UNQ0	ENSG00000118777_ABCG2	3.2461	1.5687	13.7138	1.74385e-18	2.16302e-17	31.8861
ENSG00000076864	RAP1GAP	5909	X6R8W7	ENSG00000076864_RAP1GAP	-2.38299	0.738468	-13.706	1.78319e-18	2.20866e-17	31.8547
ENSG00000133135	RNF128	79589	Q5JSK4	ENSG00000133135_RNF128	-3.90286	2.89664	-13.702	1.80368e-18	2.23245e-17	31.7954
ENSG00000104722	NEFM	4741	P07197	ENSG00000104722_NEFM	5.26817	1.68202	13.6986	1.82162e-18	2.25303e-17	31.8323
ENSG00000174749	C4orf32	132720	Q8N8J7	ENSG00000174749_C4orf32	1.01612	5.03071	13.6918	1.85732e-18	2.29392e-17	31.3553
ENSG00000156869	FRRS1	391059	Q6ZNA5	ENSG00000156869_FRRS1	1.09834	4.23386	13.6761	1.94312e-18	2.39817e-17	31.4324
ENSG00000244694	PTCHD4	442213	Q6ZW05	ENSG00000244694_PTCHD4	-2.84247	1.36457	-13.6736	1.95697e-18	2.41355e-17	31.7704
ENSG00000261175	CTD-2015G9.2	NA	NA	ENSG00000261175_CTD-2015G9.2	-4.79313	0.420354	-13.6632	2.01673e-18	2.48195e-17	31.6826
ENSG00000078900	TP73	7161	O15350	ENSG00000078900_TP73	4.32498	1.78789	13.6599	2.03617e-18	2.50409e-17	31.7316
ENSG00000253313	C1orf210	149466	Q8IVY1	ENSG00000253313_C1orf210	-1.59281	3.09916	-13.6579	2.0479e-18	2.51674e-17	31.5997
ENSG00000177707	NECTIN3	25945	C9IZE6	ENSG00000177707_NECTIN3	3.1415	1.21291	13.6561	2.05829e-18	2.52772e-17	31.722
ENSG00000077274	CAPN6	827	Q9Y6Q1	ENSG00000077274_CAPN6	3.90869	1.96698	13.6483	2.10528e-18	2.58359e-17	31.6938
ENSG00000127990	SGCE	8910	H0YC75	ENSG00000127990_SGCE	1.09122	5.30483	13.6439	2.13191e-18	2.61441e-17	31.1865
ENSG00000103528	SYT17	51760	H3BSP0	ENSG00000103528_SYT17	-5.87557	-1.27508	-13.6425	2.14072e-18	2.62337e-17	31.4111
ENSG00000265096	C1QTNF1-AS1	100507410	NA	ENSG00000265096_C1QTNF1-AS1	-3.4348	-1.7149	-13.6417	2.14538e-18	2.62721e-17	31.494
ENSG00000177191	B3GNT8	374907	Q7Z7M8	ENSG00000177191_B3GNT8	2.11394	1.22883	13.6412	2.14877e-18	2.62766e-17	31.6786
ENSG00000124171	PARD6B	84612	Q9BYG5	ENSG00000124171_PARD6B	-1.19543	2.75629	-13.6412	2.14869e-18	2.62766e-17	31.5462
ENSG00000035664	DAPK2	23604	H0YMK1	ENSG00000035664_DAPK2	-2.72321	2.91611	-13.6325	2.20291e-18	2.68817e-17	31.5469
ENSG00000067445	TRO	7216	B1AKF6	ENSG00000067445_TRO	4.30914	-1.14974	13.6319	2.20692e-18	2.69116e-17	31.466
ENSG00000152784	PRDM8	56978	NA	ENSG00000152784_PRDM8	4.04679	0.347527	13.6235	2.26093e-18	2.75509e-17	31.5994
ENSG00000166823	MESP1	55897	Q9BRJ9	ENSG00000166823_MESP1	-4.12342	0.139279	-13.6139	2.32459e-18	2.83068e-17	31.5549
ENSG00000183580	FBXL7	23194	Q9UJT9	ENSG00000183580_FBXL7	4.00588	-1.61387	13.6057	2.37985e-18	2.89187e-17	31.363
ENSG00000165959	CLMN	79789	Q96JQ2	ENSG00000165959_CLMN	-1.80887	5.78689	-13.6025	2.40245e-18	2.91728e-17	31.0332
ENSG00000171357	LURAP1	541468	Q96LR2	ENSG00000171357_LURAP1	1.22339	2.53146	13.5974	2.43752e-18	2.95779e-17	31.4487
ENSG00000249852	AC145676.2	NA	NA	ENSG00000249852_AC145676.2	-3.39845	-3.35762	-13.5888	2.49914e-18	3.02708e-17	31.0584
ENSG00000272449	RP3-395M20.12	NA	NA	ENSG00000272449_RP3-395M20.12	-3.29446	-1.20264	-13.5839	2.53466e-18	3.06708e-17	31.3786
ENSG00000168389	MFSD2A	84879	Q8NA29	ENSG00000168389_MFSD2A	1.31177	5.91709	13.5802	2.56195e-18	3.09578e-17	30.9331
ENSG00000184949	FAM227A	646851	NA	ENSG00000184949_FAM227A	-1.95352	1.97508	-13.5749	2.60135e-18	3.14119e-17	31.4082
ENSG00000139725	RHOF	54509	Q9HBH0	ENSG00000139725_RHOF	-1.75228	4.13978	-13.5596	2.71908e-18	3.27424e-17	31.1344
ENSG00000255031	RP11-802E16.3	NA	NA	ENSG00000255031_RP11-802E16.3	-1.96758	0.679115	-13.5426	2.85595e-18	3.43427e-17	31.3909
ENSG00000229647	AC007879.7	NA	NA	ENSG00000229647_AC007879.7	2.07989	2.73831	13.5421	2.86009e-18	3.43687e-17	31.3002
ENSG00000243004	AC005062.2	NA	NA	ENSG00000243004_AC005062.2	-3.6739	-3.14909	-13.4958	3.27041e-18	3.92177e-17	30.8061
ENSG00000164823	OSGIN2	734	Q9Y236	ENSG00000164823_OSGIN2	-1.37363	6.05408	-13.4954	3.27434e-18	3.92378e-17	30.6737
ENSG00000157510	AFAP1L1	134265	NA	ENSG00000157510_AFAP1L1	1.31814	4.91668	13.4895	3.33113e-18	3.98631e-17	30.7743
ENSG00000119227	PIGZ	80235	Q86VD9	ENSG00000119227_PIGZ	-1.74214	1.43988	-13.4831	3.3939e-18	4.05862e-17	31.2125
ENSG00000141448	GATA6	2627	Q92908	ENSG00000141448_GATA6	-3.07276	2.46851	-13.4812	3.41236e-18	4.07789e-17	31.1732
ENSG00000240207	RP11-379F4.4	NA	NA	ENSG00000240207_RP11-379F4.4	-3.23946	0.28839	-13.4782	3.4423e-18	4.11083e-17	31.2001
ENSG00000043039	BARX2	8538	Q9UMQ3	ENSG00000043039_BARX2	-3.35546	2.95628	-13.475	3.47458e-18	4.14652e-17	31.1416
ENSG00000204262	COL5A2	1290	P05997	ENSG00000204262_COL5A2	2.89987	5.40265	13.4746	3.47839e-18	4.14822e-17	30.7713
ENSG00000141068	KSR1	8844	J3QKR8	ENSG00000141068_KSR1	-1.98245	2.55272	-13.4727	3.4979e-18	4.16861e-17	31.0968
ENSG00000108375	RNF43	54894	Q68DV7	ENSG00000108375_RNF43	1.13736	4.29252	13.4677	3.54881e-18	4.22347e-17	30.8116
ENSG00000007216	SLC13A2	9058	Q13183	ENSG00000007216_SLC13A2	-5.48709	-2.18293	-13.4654	3.57252e-18	4.24877e-17	30.8228
ENSG00000104055	TGM5	9333	O43548	ENSG00000104055_TGM5	-7.77229	0.542023	-13.4614	3.61396e-18	4.29217e-17	30.9887
ENSG00000157216	SSBP3	23648	NA	ENSG00000157216_SSBP3	1.09067	5.20893	13.4568	3.66303e-18	4.34392e-17	30.6777
ENSG00000074416	MGLL	11343	Q99685	ENSG00000074416_MGLL	-1.72156	5.75082	-13.457	3.6608e-18	4.34392e-17	30.6106
ENSG00000136514	RTP4	64108	Q96DX8	ENSG00000136514_RTP4	-3.23276	0.660681	-13.4566	3.66505e-18	4.34392e-17	31.1442
ENSG00000116016	EPAS1	2034	NA	ENSG00000116016_EPAS1	1.27139	7.97286	13.4562	3.66891e-18	4.34551e-17	30.4585
ENSG00000130234	ACE2	59272	Q9BYF1	ENSG00000130234_ACE2	-5.36146	-0.779979	-13.4546	3.68605e-18	4.36283e-17	30.9726
ENSG00000228951	RP11-336A10.4	NA	NA	ENSG00000228951_RP11-336A10.4	4.89646	-0.156513	13.4529	3.70403e-18	4.38112e-17	31.0386
ENSG00000148180	GSN	2934	NA	ENSG00000148180_GSN	-1.72638	8.1009	-13.4501	3.73489e-18	4.41318e-17	30.4476
ENSG00000204540	PSORS1C1	170679	NA	ENSG00000204540_PSORS1C1	-2.36913	1.68328	-13.45	3.73623e-18	4.41318e-17	31.1245
ENSG00000204642	HLA-F	3134	P30511	ENSG00000204642_HLA-F	-1.93683	4.01496	-13.4452	3.78849e-18	4.46881e-17	30.8375
ENSG00000100181	TPTEP1	387590	NA	ENSG00000100181_TPTEP1	-2.56372	3.87997	-13.4453	3.78722e-18	4.46881e-17	30.8821
ENSG00000108684	ASIC2	40	Q16515	ENSG00000108684_ASIC2	3.80376	-2.92976	13.4399	3.84744e-18	4.53218e-17	30.7187
ENSG00000166813	KIF7	374654	Q2M1P5	ENSG00000166813_KIF7	1.05914	3.13671	13.4344	3.90902e-18	4.6016e-17	30.8813
ENSG00000184574	LPAR5	57121	Q9H1C0	ENSG00000184574_LPAR5	-2.84281	1.96303	-13.4341	3.91246e-18	4.60252e-17	31.0616
ENSG00000187498	COL4A1	1282	P02462	ENSG00000187498_COL4A1	1.61386	7.28686	13.4192	4.08543e-18	4.79298e-17	30.3708
ENSG00000251537	RP11-385D13.1	NA	H0Y626	ENSG00000251537_RP11-385D13.1	-3.34666	-2.67886	-13.4175	4.10629e-18	4.81419e-17	30.7574
ENSG00000136542	GALNT5	11227	Q7Z7M9	ENSG00000136542_GALNT5	2.53234	4.28623	13.4052	4.25575e-18	4.98268e-17	30.7294
ENSG00000156453	PCDH1	5097	Q08174	ENSG00000156453_PCDH1	-2.15376	6.15572	-13.4048	4.26016e-18	4.98448e-17	30.4496
ENSG00000143416	SELENBP1	8991	Q13228	ENSG00000143416_SELENBP1	-7.52344	1.01075	-13.394	4.39638e-18	5.13692e-17	30.8181
ENSG00000237548	TTLL11-IT1	NA	NA	ENSG00000237548_TTLL11-IT1	4.08425	-1.96639	13.3908	4.43796e-18	5.18048e-17	30.707
ENSG00000091972	CD200	4345	U3KQQ2	ENSG00000091972_CD200	5.16535	-0.733273	13.3839	4.52725e-18	5.27915e-17	30.8008
ENSG00000106013	ANKRD7	56311	NA	ENSG00000106013_ANKRD7	3.0398	-1.58228	13.3616	4.83193e-18	5.62686e-17	30.6799
ENSG00000078804	TP53INP2	58476	Q8IXH6	ENSG00000078804_TP53INP2	-2.72172	4.32782	-13.3573	4.89245e-18	5.68969e-17	30.5736
ENSG00000128045	RASL11B	65997	Q9BPW5	ENSG00000128045_RASL11B	1.64857	1.1969	13.3564	4.90569e-18	5.70126e-17	30.8529
ENSG00000137673	MMP7	4316	P09237	ENSG00000137673_MMP7	-8.68738	4.69158	-13.3561	4.90919e-18	5.70151e-17	30.8303
ENSG00000130270	ATP8B3	148229	O60423	ENSG00000130270_ATP8B3	3.32749	0.735036	13.3553	4.92121e-18	5.71164e-17	30.8528
ENSG00000091592	NLRP1	22861	Q9C000	ENSG00000091592_NLRP1	2.42382	3.83901	13.3487	5.01653e-18	5.81836e-17	30.6067
ENSG00000157423	HYDIN	54768	Q4G0P3	ENSG00000157423_HYDIN	-2.21031	0.692029	-13.343	5.10136e-18	5.90289e-17	30.8233
ENSG00000100060	MFNG	4242	O00587	ENSG00000100060_MFNG	1.73468	2.06856	13.3334	5.24611e-18	6.05627e-17	30.6787
ENSG00000136205	TNS3	64759	H7BZ64	ENSG00000136205_TNS3	-1.53934	6.77849	-13.3328	5.25466e-18	6.06211e-17	30.155
ENSG00000146147	MLIP	90523	D6R9R6	ENSG00000146147_MLIP	-4.33592	-3.4292	-13.3214	5.43385e-18	6.26049e-17	30.2946
ENSG00000240040	AC096579.15	NA	NA	ENSG00000240040_AC096579.15	-4.68009	-2.21709	-13.3158	5.52331e-18	6.35511e-17	30.4197
ENSG00000213949	ITGA1	3672	P56199	ENSG00000213949_ITGA1	1.85771	3.88388	13.3132	5.56465e-18	6.39842e-17	30.4693
ENSG00000145220	LYAR	55646	NA	ENSG00000145220_LYAR	1.18221	6.03659	13.3075	5.65786e-18	6.50129e-17	30.1269
ENSG00000223547	ZNF844	284391	Q08AG5	ENSG00000223547_ZNF844	-3.95541	0.151656	-13.3065	5.67537e-18	6.51709e-17	30.6577
ENSG00000171843	MLLT3	4300	P42568	ENSG00000171843_MLLT3	-1.67714	3.78822	-13.3018	5.75437e-18	6.60343e-17	30.4327
ENSG00000088386	SLC15A1	6564	P46059	ENSG00000088386_SLC15A1	-6.22964	-1.43335	-13.3007	5.77192e-18	6.61918e-17	30.4288
ENSG00000163531	NFASC	23114	NA	ENSG00000163531_NFASC	4.05164	2.50644	13.2974	5.8274e-18	6.67839e-17	30.6507
ENSG00000231638	AC011738.4	100506895	NA	ENSG00000231638_AC011738.4	3.97674	-0.798056	13.2944	5.8788e-18	6.72395e-17	30.5841
ENSG00000172789	HOXC5	3222	Q00444	ENSG00000172789_HOXC5	3.33782	-2.43009	13.2941	5.8847e-18	6.72626e-17	30.3946
ENSG00000151789	ZNF385D	79750	Q9H6B1	ENSG00000151789_ZNF385D	1.56432	3.06826	13.2914	5.93177e-18	6.77559e-17	30.5002
ENSG00000042980	ADAM28	10863	Q9UKQ2	ENSG00000042980_ADAM28	-4.22681	-0.798463	-13.2839	6.06218e-18	6.91544e-17	30.5099
ENSG00000131398	KCNC3	3748	E7ETH1	ENSG00000131398_KCNC3	-5.88365	-0.13486	-13.2779	6.17062e-18	7.02527e-17	30.5257
ENSG00000261521	NA	NA	NA	ENSG00000261521_NA	-2.91006	0.746236	-13.2707	6.30225e-18	7.16571e-17	30.6078
ENSG00000103227	LMF1	64788	Q96S06	ENSG00000103227_LMF1	-2.29678	2.07903	-13.2692	6.33017e-18	7.18811e-17	30.5587
ENSG00000140044	JDP2	122953	Q8WYK2	ENSG00000140044_JDP2	-2.36379	2.25287	-13.2611	6.48178e-18	7.34573e-17	30.5389
ENSG00000241839	PLEKHO2	80301	Q8TD55	ENSG00000241839_PLEKHO2	1.30369	2.6812	13.2597	6.5071e-18	7.36961e-17	30.4606
ENSG00000269855	RNF225	646862	M0QZC1	ENSG00000269855_RNF225	-4.21476	-1.35332	-13.2542	6.61442e-18	7.48138e-17	30.4139
ENSG00000042286	AIFM2	84883	Q9BRQ8	ENSG00000042286_AIFM2	-1.19233	4.35177	-13.2428	6.83721e-18	7.70821e-17	30.152
ENSG00000163406	SLC15A2	6565	Q16348	ENSG00000163406_SLC15A2	-4.25887	1.44271	-13.2329	7.03942e-18	7.93102e-17	30.5055
ENSG00000151715	TMEM45B	120224	Q96B21	ENSG00000151715_TMEM45B	-2.90437	3.81679	-13.2313	7.07342e-18	7.96415e-17	30.3057
ENSG00000253671	RP11-806O11.1	NA	NA	ENSG00000253671_RP11-806O11.1	-4.04475	-2.47043	-13.229	7.12055e-18	8.01201e-17	30.2298
ENSG00000121957	GPSM2	29899	P81274	ENSG00000121957_GPSM2	1.31283	6.49882	13.2284	7.13268e-18	8.02044e-17	29.8552
ENSG00000163817	SLC6A20	54716	Q9NP91	ENSG00000163817_SLC6A20	-5.76329	-2.04155	-13.2094	7.54169e-18	8.45841e-17	30.1573
ENSG00000189108	IL1RAPL2	26280	Q9NP60	ENSG00000189108_IL1RAPL2	2.89403	-0.495388	13.2047	7.64725e-18	8.57125e-17	30.3716
ENSG00000130066	SAT1	6303	A6NJE6	ENSG00000130066_SAT1	-2.31637	9.24942	-13.188	8.03183e-18	8.97906e-17	29.6485
ENSG00000143367	TUFT1	7286	Q9NNX1	ENSG00000143367_TUFT1	-1.63138	4.88767	-13.1844	8.11695e-18	9.06254e-17	29.9046
ENSG00000128284	APOL3	80833	O95236	ENSG00000128284_APOL3	-2.62953	2.44676	-13.1844	8.11585e-18	9.06254e-17	30.2897
ENSG00000188293	IGFL1	374918	Q6UW32	ENSG00000188293_IGFL1	-5.06029	1.91494	-13.1837	8.13308e-18	9.07469e-17	30.3624
ENSG00000157551	KCNJ15	3772	F8VW46	ENSG00000157551_KCNJ15	2.2987	3.78312	13.1745	8.35593e-18	9.29343e-17	30.0898
ENSG00000164465	DCBLD1	285761	NA	ENSG00000164465_DCBLD1	-1.39081	7.59259	-13.1724	8.40833e-18	9.3457e-17	29.6309
ENSG00000248538	RP11-10A14.5	101929128	NA	ENSG00000248538_RP11-10A14.5	-2.18356	0.212246	-13.1707	8.44903e-18	9.38492e-17	30.3095
ENSG00000269019	AC005932.1	102724360	NA	ENSG00000269019_AC005932.1	1.77372	-0.422968	13.1671	8.53878e-18	9.47854e-17	30.2872
ENSG00000164604	GPR85	54329	P60893	ENSG00000164604_GPR85	3.37986	-0.847232	13.1638	8.6236e-18	9.56656e-17	30.2002
ENSG00000162817	C1orf115	79762	Q9H7X2	ENSG00000162817_C1orf115	-1.75977	2.4338	-13.1533	8.89494e-18	9.85496e-17	30.2004
ENSG00000152503	TRIM36	55521	Q9NQ86	ENSG00000152503_TRIM36	-1.53254	1.85514	-13.1527	8.90915e-18	9.86439e-17	30.2209
ENSG00000189410	SH2D5	400745	Q6ZV89	ENSG00000189410_SH2D5	3.27006	3.35317	13.1467	9.06887e-18	1.00156e-16	30.0917
ENSG00000188549	C15orf52	388115	Q6ZUT6	ENSG00000188549_C15orf52	-1.44699	7.72241	-13.1451	9.11122e-18	1.00496e-16	29.5358
ENSG00000122136	OBP2A	29991	F5H159	ENSG00000122136_OBP2A	-4.63486	-2.9104	-13.1435	9.15388e-18	1.00902e-16	29.876
ENSG00000187017	ESPN	83715	NA	ENSG00000187017_ESPN	-2.5312	3.33756	-13.1272	9.60388e-18	1.05594e-16	30.0173
ENSG00000124839	RAB17	64284	F8WAG1	ENSG00000124839_RAB17	-1.04493	4.1238	-13.1269	9.61318e-18	1.05629e-16	29.8127
ENSG00000112164	GLP1R	2740	P43220	ENSG00000112164_GLP1R	-4.44431	-0.376443	-13.122	9.75351e-18	1.07103e-16	30.124
ENSG00000099998	GGT5	2687	P36269	ENSG00000099998_GGT5	-5.42114	-1.64152	-13.1196	9.82185e-18	1.07785e-16	29.9703
ENSG00000106484	MEST	4232	Q5EB52	ENSG00000106484_MEST	1.90181	7.03523	13.1121	1.00416e-17	1.10058e-16	29.4842
ENSG00000180592	SKIDA1	387640	E9PAX1	ENSG00000180592_SKIDA1	1.49721	0.598092	13.1115	1.006e-17	1.1019e-16	30.1523
ENSG00000233705	SLC26A4-AS1	286002	NA	ENSG00000233705_SLC26A4-AS1	-3.27869	-2.46711	-13.1108	1.00786e-17	1.10324e-16	29.8933
ENSG00000237149	ZNF503-AS2	100131213	NA	ENSG00000237149_ZNF503-AS2	2.68853	0.12725	13.1103	1.00953e-17	1.10436e-16	30.1126
ENSG00000164509	IL31RA	133396	Q8NI17	ENSG00000164509_IL31RA	4.26135	0.350748	13.1077	1.01717e-17	1.11202e-16	30.0935
ENSG00000177098	SCN4B	6330	NA	ENSG00000177098_SCN4B	5.19599	1.36073	13.1028	1.03186e-17	1.12737e-16	30.1174
ENSG00000108448	TRIM16L	147166	Q309B1	ENSG00000108448_TRIM16L	-1.29584	3.83232	-13.0968	1.05055e-17	1.14707e-16	29.8062
ENSG00000070526	ST6GALNAC1	55808	G3XAD9	ENSG00000070526_ST6GALNAC1	-5.44135	-2.46507	-13.0897	1.07281e-17	1.17064e-16	29.7688
ENSG00000137699	TRIM29	23650	Q14134	ENSG00000137699_TRIM29	1.23082	8.60744	13.0775	1.11209e-17	1.21197e-16	29.3252
ENSG00000114698	PLSCR4	57088	Q9NRQ2	ENSG00000114698_PLSCR4	-1.45986	3.61869	-13.0735	1.12521e-17	1.22549e-16	29.794
ENSG00000111110	PPM1H	57460	Q9ULR3	ENSG00000111110_PPM1H	-6.76952	0.956779	-13.0695	1.13845e-17	1.23914e-16	29.9643
ENSG00000138031	ADCY3	109	O60266	ENSG00000138031_ADCY3	1.44197	5.99307	13.0675	1.14519e-17	1.24569e-16	29.4177
ENSG00000272163	GS1-72M22.1	NA	NA	ENSG00000272163_GS1-72M22.1	3.65913	-1.9995	13.0574	1.18006e-17	1.28121e-16	29.7737
ENSG00000130821	SLC6A8	6535	P48029	ENSG00000130821_SLC6A8	1.20657	5.87229	13.0527	1.19639e-17	1.29569e-16	29.3684
ENSG00000224081	LINC01057	101928079	NA	ENSG00000224081_LINC01057	-2.68383	0.639493	-13.0512	1.20164e-17	1.30057e-16	29.973
ENSG00000064205	WISP2	8839	O76076	ENSG00000064205_WISP2	-4.91146	-0.921252	-13.0427	1.23229e-17	1.3329e-16	29.8252
ENSG00000125872	LRRN4	164312	Q8WUT4	ENSG00000125872_LRRN4	-4.16862	-1.07122	-13.0219	1.31061e-17	1.41233e-16	29.7865
ENSG00000164309	CMYA5	202333	Q8N3K9	ENSG00000164309_CMYA5	-3.93493	3.52025	-13.0216	1.3117e-17	1.41262e-16	29.7604
ENSG00000167601	AXL	558	P30530	ENSG00000167601_AXL	2.05895	6.82639	13.0166	1.33134e-17	1.43199e-16	29.2021
ENSG00000128881	TTBK2	146057	Q6IQ55	ENSG00000128881_TTBK2	1.07808	4.56995	13.0104	1.35609e-17	1.45771e-16	29.4127
ENSG00000013288	MAN2B2	23324	Q9Y2E5	ENSG00000013288_MAN2B2	-1.08972	5.85799	-13.0006	1.396e-17	1.49875e-16	29.2446
ENSG00000175984	DENND2C	163259	Q68D51	ENSG00000175984_DENND2C	1.2038	4.39342	12.9995	1.4004e-17	1.50254e-16	29.4183
ENSG00000047346	FAM214A	56204	NA	ENSG00000047346_FAM214A	-1.28329	4.77128	-12.9991	1.4023e-17	1.50365e-16	29.3575
ENSG00000139192	TAPBPL	55080	NA	ENSG00000139192_TAPBPL	-1.54291	2.76649	-12.9931	1.42736e-17	1.52675e-16	29.6564
ENSG00000177181	RIMKLA	284716	X1WI25	ENSG00000177181_RIMKLA	-4.58254	-1.89587	-12.9932	1.42698e-17	1.52675e-16	29.6197
ENSG00000117115	PADI2	11240	Q9Y2J8	ENSG00000117115_PADI2	-8.16606	3.48528	-12.9789	1.48872e-17	1.59139e-16	29.765
ENSG00000167107	ACSF2	80221	E7EN53	ENSG00000167107_ACSF2	-1.19803	4.86302	-12.9762	1.50037e-17	1.60187e-16	29.276
ENSG00000143365	RORC	6097	P51449	ENSG00000143365_RORC	-4.97166	-0.853903	-12.9741	1.51006e-17	1.61122e-16	29.5976
ENSG00000028277	POU2F2	5452	P09086	ENSG00000028277_POU2F2	3.387	0.474371	12.9716	1.52101e-17	1.62191e-16	29.7366
ENSG00000180638	SLC47A2	146802	Q86VL8	ENSG00000180638_SLC47A2	3.89062	-2.51878	12.9711	1.52357e-17	1.62364e-16	29.4652
ENSG00000171130	ATP6V0E2	155066	E9PAS2	ENSG00000171130_ATP6V0E2	-2.00831	3.95606	-12.9615	1.56761e-17	1.66954e-16	29.406
ENSG00000065717	TLE2	7089	Q04725	ENSG00000065717_TLE2	-3.72272	1.77446	-12.9455	1.64368e-17	1.74627e-16	29.6544
ENSG00000163393	SLC22A15	55356	Q8IZD6	ENSG00000163393_SLC22A15	1.00722	3.7247	12.9417	1.66213e-17	1.76371e-16	29.3275
ENSG00000116711	PLA2G4A	5321	P47712	ENSG00000116711_PLA2G4A	1.39699	5.23406	12.9385	1.67811e-17	1.77849e-16	29.1264
ENSG00000157992	KRTCAP3	200634	Q53RY4	ENSG00000157992_KRTCAP3	-1.19441	4.22227	-12.9202	1.77173e-17	1.87542e-16	29.1989
ENSG00000235863	B3GALT4	8705	O96024	ENSG00000235863_B3GALT4	-2.26481	1.01008	-12.9176	1.78546e-17	1.88765e-16	29.584
ENSG00000136010	ALDH1L2	160428	NA	ENSG00000136010_ALDH1L2	1.8374	5.76122	12.9123	1.81419e-17	1.91685e-16	29.0158
ENSG00000262884	CTD-3060P21.1	101927911	NA	ENSG00000262884_CTD-3060P21.1	-3.93235	-2.9151	-12.9028	1.86588e-17	1.96906e-16	29.1849
ENSG00000169085	C8orf46	254778	NA	ENSG00000169085_C8orf46	-3.47388	-2.28368	-12.8976	1.89516e-17	1.99753e-16	29.349
ENSG00000123405	NFE2	4778	Q16621	ENSG00000123405_NFE2	-4.05157	-0.74595	-12.8942	1.91413e-17	2.01629e-16	29.4429
ENSG00000167972	ABCA3	21	Q99758	ENSG00000167972_ABCA3	-5.00754	1.71674	-12.8915	1.92963e-17	2.03139e-16	29.5083
ENSG00000101842	VSIG1	340547	Q86XK7	ENSG00000101842_VSIG1	1.88799	0.491058	12.8735	2.0361e-17	2.13932e-16	29.4556
ENSG00000109790	KLHL5	51088	Q96PQ7	ENSG00000109790_KLHL5	-1.04031	6.50693	-12.87	2.05713e-17	2.15905e-16	28.7733
ENSG00000269728	NA	NA	NA	ENSG00000269728_NA	1.08867	5.15577	12.858	2.132e-17	2.23493e-16	28.8778
ENSG00000064300	NGFR	4804	P08138	ENSG00000064300_NGFR	6.2749	4.00003	12.8556	2.14725e-17	2.24955e-16	29.3252
ENSG00000151229	SLC2A13	114134	Q96QE2	ENSG00000151229_SLC2A13	1.48262	1.88689	12.8487	2.19214e-17	2.2938e-16	29.314
ENSG00000187609	EXD3	54932	E9PSB6	ENSG00000187609_EXD3	-1.10636	2.77863	-12.8483	2.19457e-17	2.29497e-16	29.1998
ENSG00000176058	TPRN	286262	H3BLU1	ENSG00000176058_TPRN	-1.27779	3.4112	-12.843	2.22973e-17	2.32704e-16	29.0992
ENSG00000140416	TPM1	7168	P09493	ENSG00000140416_TPM1	-1.48444	8.85146	-12.8429	2.23062e-17	2.32704e-16	28.6154
ENSG00000113504	SLC12A7	10723	Q9Y666	ENSG00000113504_SLC12A7	-2.06672	5.09729	-12.8431	2.22873e-17	2.32704e-16	28.8906
ENSG00000186007	LEMD1	93273	Q68G75	ENSG00000186007_LEMD1	-5.47691	0.2778	-12.8335	2.29384e-17	2.39012e-16	29.2758
ENSG00000176401	EID2B	126272	Q96D98	ENSG00000176401_EID2B	1.36438	0.19046	12.8324	2.30144e-17	2.39516e-16	29.3316
ENSG00000272894	RP5-1159O4.1	NA	NA	ENSG00000272894_RP5-1159O4.1	-2.80412	-1.20227	-12.8274	2.33555e-17	2.42919e-16	29.245
ENSG00000008516	MMP25	64386	Q9NPA2	ENSG00000008516_MMP25	-3.16882	0.70705	-12.8221	2.37319e-17	2.46686e-16	29.3014
ENSG00000273297	RP11-38M8.1	NA	NA	ENSG00000273297_RP11-38M8.1	1.97363	-0.347331	12.8217	2.37602e-17	2.46833e-16	29.2711
ENSG00000204282	TNRC6C-AS1	100131096	NA	ENSG00000204282_TNRC6C-AS1	-4.0462	0.067048	-12.8168	2.4107e-17	2.50286e-16	29.2481
ENSG00000150551	LYPD1	116372	Q8N2G4	ENSG00000150551_LYPD1	-4.44387	-0.499078	-12.8143	2.42918e-17	2.51902e-16	29.2249
ENSG00000170458	CD14	929	P08571	ENSG00000170458_CD14	-2.38691	3.8685	-12.8061	2.48914e-17	2.57966e-16	28.998
ENSG00000147251	DOCK11	139818	A6NIW2	ENSG00000147251_DOCK11	4.09102	2.29214	12.796	2.56521e-17	2.65531e-16	29.2095
ENSG00000164749	HNF4G	3174	NA	ENSG00000164749_HNF4G	-5.08103	-3.05154	-12.7947	2.57544e-17	2.66431e-16	28.895
ENSG00000186212	SOWAHB	345079	A6NEL2	ENSG00000186212_SOWAHB	-4.88343	0.999517	-12.7917	2.59858e-17	2.68664e-16	29.2002
ENSG00000070808	CAMK2A	815	Q9UQM7	ENSG00000070808_CAMK2A	4.52335	-0.842606	12.7842	2.65771e-17	2.74614e-16	29.1019
ENSG00000172927	MYEOV	26579	Q96EZ4	ENSG00000172927_MYEOV	-6.83795	0.929233	-12.769	2.781e-17	2.86499e-16	29.0938
ENSG00000168907	PLA2G4F	255189	Q68DD2	ENSG00000168907_PLA2G4F	-3.12357	0.385098	-12.7516	2.92935e-17	3.01245e-16	29.0754
ENSG00000008323	PLEKHG6	55200	Q3KR16	ENSG00000008323_PLEKHG6	-2.00957	3.28514	-12.7407	3.0269e-17	3.11092e-16	28.8566
ENSG00000197142	ACSL5	51703	Q9ULC5	ENSG00000197142_ACSL5	-5.15764	1.27858	-12.7355	3.07488e-17	3.15836e-16	29.0436
ENSG00000225511	LINC00475	NA	NA	ENSG00000225511_LINC00475	-2.14419	-1.67179	-12.7316	3.11102e-17	3.19359e-16	28.9148
ENSG00000006118	TMEM132A	54972	NA	ENSG00000006118_TMEM132A	-1.53033	6.23967	-12.7273	3.15091e-17	3.2307e-16	28.3681
ENSG00000164438	TLX3	30012	O43711	ENSG00000164438_TLX3	-4.41043	-2.18392	-12.711	3.3088e-17	3.38859e-16	28.7976
ENSG00000177989	ODF3B	440836	NA	ENSG00000177989_ODF3B	-2.11275	1.31509	-12.7047	3.37151e-17	3.45077e-16	28.9303
ENSG00000140297	GCNT3	9245	NA	ENSG00000140297_GCNT3	-5.46686	0.411743	-12.7042	3.37697e-17	3.45431e-16	28.9107
ENSG00000005513	SOX8	30812	P57073	ENSG00000005513_SOX8	-4.20555	-2.71594	-12.7012	3.40766e-17	3.48366e-16	28.6487
ENSG00000135835	KIAA1614	57710	NA	ENSG00000135835_KIAA1614	2.74498	-0.930532	12.7008	3.41176e-17	3.48579e-16	28.8638
ENSG00000145604	SKP2	6502	Q13309	ENSG00000145604_SKP2	1.06916	5.74854	12.7006	3.41393e-17	3.48595e-16	28.3187
ENSG00000236740	RP11-411K7.1	101927189	NA	ENSG00000236740_RP11-411K7.1	-4.82718	-2.65438	-12.6996	3.42407e-17	3.49424e-16	28.6704
ENSG00000148737	TCF7L2	6934	Q9NQB0	ENSG00000148737_TCF7L2	-1.06152	5.57803	-12.6905	3.51859e-17	3.58648e-16	28.3107
ENSG00000224897	POT1-AS1	401398	NA	ENSG00000224897_POT1-AS1	-3.31219	-1.22709	-12.6893	3.53165e-17	3.59768e-16	28.8082
ENSG00000232070	TMEM253	643382	H0YLA3	ENSG00000232070_TMEM253	2.66348	-0.985312	12.6869	3.55685e-17	3.62122e-16	28.8177
ENSG00000127329	PTPRB	5787	P23467	ENSG00000127329_PTPRB	-3.69189	2.27695	-12.6865	3.56153e-17	3.62385e-16	28.8654
ENSG00000196782	MAML3	55534	Q96JK9	ENSG00000196782_MAML3	-1.84456	2.34161	-12.6856	3.57031e-17	3.63065e-16	28.8197
ENSG00000111911	HINT3	135114	Q9NQE9	ENSG00000111911_HINT3	-1.00371	5.01698	-12.683	3.59894e-17	3.65762e-16	28.3772
ENSG00000113763	UNC5A	90249	Q6ZN44	ENSG00000113763_UNC5A	-4.49148	-2.38067	-12.6815	3.61479e-17	3.67158e-16	28.6431
ENSG00000115828	QPCT	25797	Q16769	ENSG00000115828_QPCT	-1.90655	4.155	-12.6632	3.8193e-17	3.87476e-16	28.4873
ENSG00000101213	PTK6	5753	Q13882	ENSG00000101213_PTK6	-2.79085	2.42484	-12.6629	3.82317e-17	3.87641e-16	28.7674
ENSG00000186765	FSCN2	25794	O14926	ENSG00000186765_FSCN2	-3.1716	-1.92705	-12.6609	3.84581e-17	3.89709e-16	28.6498
ENSG00000196668	LINC00173	100287569	NA	ENSG00000196668_LINC00173	3.53001	-0.72841	12.6581	3.87763e-17	3.92474e-16	28.7766
ENSG00000271133	CTA-293F17.1	NA	NA	ENSG00000271133_CTA-293F17.1	-1.99581	1.07971	-12.6575	3.88548e-17	3.93039e-16	28.809
ENSG00000089199	CHGB	1114	P05060	ENSG00000089199_CHGB	3.44562	-1.70961	12.6477	4.0014e-17	4.04529e-16	28.6166
ENSG00000124479	NDP	4693	Q00604	ENSG00000124479_NDP	-4.13741	-0.727643	-12.6461	4.02035e-17	4.06208e-16	28.7044
ENSG00000162511	LAPTM5	7805	Q13571	ENSG00000162511_LAPTM5	4.18472	0.546213	12.6449	4.03567e-17	4.07518e-16	28.7654
ENSG00000019169	MARCO	8685	Q9UEW3	ENSG00000019169_MARCO	-3.66254	-1.51041	-12.6369	4.13339e-17	4.17143e-16	28.5989
ENSG00000257702	LBX2-AS1	NA	NA	ENSG00000257702_LBX2-AS1	-3.05575	-1.67413	-12.6364	4.13913e-17	4.17478e-16	28.6366
ENSG00000143786	CNIH3	149111	NA	ENSG00000143786_CNIH3	2.46595	0.789485	12.6261	4.27037e-17	4.30465e-16	28.7213
ENSG00000110092	CCND1	595	P24385	ENSG00000110092_CCND1	-1.35402	9.55934	-12.6221	4.32138e-17	4.35354e-16	27.942
ENSG00000228639	AC005152.3	102723505	NA	ENSG00000228639_AC005152.3	-6.81233	0.839227	-12.6158	4.40386e-17	4.42891e-16	28.6386
ENSG00000166016	ABTB2	25841	Q8N961	ENSG00000166016_ABTB2	-1.59652	3.74075	-12.6044	4.5577e-17	4.57566e-16	28.3546
ENSG00000254902	ANO1-AS1	NA	NA	ENSG00000254902_ANO1-AS1	3.51535	-1.70256	12.5993	4.62928e-17	4.63945e-16	28.463
ENSG00000259342	RP11-519G16.5	NA	NA	ENSG00000259342_RP11-519G16.5	-4.66009	-3.22853	-12.5932	4.71527e-17	4.71744e-16	28.2879
ENSG00000184925	LCN12	286256	NA	ENSG00000184925_LCN12	-3.05519	-1.8239	-12.5869	4.80454e-17	4.80399e-16	28.5248
ENSG00000083444	PLOD1	5351	NA	ENSG00000083444_PLOD1	-1.11569	8.11616	-12.5863	4.81373e-17	4.8104e-16	27.8516
ENSG00000156298	TSPAN7	7102	P41732	ENSG00000156298_TSPAN7	4.18933	-1.28726	12.5705	5.04797e-17	5.03867e-16	28.4603
ENSG00000233725	LINC00284	121838	NA	ENSG00000233725_LINC00284	-6.35575	-1.58699	-12.5658	5.12052e-17	5.10814e-16	28.3308
ENSG00000188153	COL4A5	1287	NA	ENSG00000188153_COL4A5	1.21469	6.83722	12.5561	5.27299e-17	5.24816e-16	27.809
ENSG00000231121	NA	NA	NA	ENSG00000231121_NA	3.60749	-3.57539	12.5488	5.38976e-17	5.35822e-16	28.1393
ENSG00000180448	ARHGAP45	23526	Q92619	ENSG00000180448_ARHGAP45	-1.80891	2.56214	-12.5423	5.49686e-17	5.45843e-16	28.3334
ENSG00000113369	ARRDC3	57561	Q96B67	ENSG00000113369_ARRDC3	-1.14794	6.89136	-12.5384	5.56165e-17	5.5196e-16	27.7364
ENSG00000198753	PLXNB3	5365	Q9ULL4	ENSG00000198753_PLXNB3	-1.54475	4.60569	-12.5362	5.5997e-17	5.55419e-16	27.9701
ENSG00000165821	SALL2	6297	Q9Y467	ENSG00000165821_SALL2	2.64502	1.1892	12.5291	5.72037e-17	5.66739e-16	28.4306
ENSG00000143341	HMCN1	83872	Q96RW7	ENSG00000143341_HMCN1	4.27115	3.88034	12.5024	6.20197e-17	6.134e-16	28.154
ENSG00000121005	CRISPLD1	83690	Q9H336	ENSG00000121005_CRISPLD1	2.21114	2.181	12.5017	6.21459e-17	6.14298e-16	28.2643
ENSG00000144824	PHLDB2	90102	Q86SQ0	ENSG00000144824_PHLDB2	1.11226	7.5324	12.5011	6.22581e-17	6.15056e-16	27.6027
ENSG00000160223	ICOSLG	102723996	O75144	ENSG00000160223_ICOSLG	1.2309	3.62975	12.4903	6.4333e-17	6.34108e-16	28.012
ENSG00000137877	SPTBN5	51332	Q9NRC6	ENSG00000137877_SPTBN5	-2.16882	3.89527	-12.487	6.49719e-17	6.39678e-16	27.925
ENSG00000164088	PPM1M	132160	H7C3S3	ENSG00000164088_PPM1M	1.34782	3.03132	12.4862	6.5136e-17	6.40929e-16	28.1017
ENSG00000198865	CCDC152	100129792	Q4G0S7	ENSG00000198865_CCDC152	4.35518	-1.38349	12.4838	6.56098e-17	6.45225e-16	28.1742
ENSG00000204396	VWA7	80737	Q9Y334	ENSG00000204396_VWA7	-1.7602	0.866253	-12.4829	6.57812e-17	6.46543e-16	28.2893
ENSG00000170801	HTRA3	94031	P83110	ENSG00000170801_HTRA3	3.44605	-2.83494	12.4747	6.74379e-17	6.61701e-16	28.0337
ENSG00000124191	TOX2	84969	Q96NM4	ENSG00000124191_TOX2	3.72831	0.9377	12.4569	7.11719e-17	6.97155e-16	28.2191
ENSG00000171016	PYGO1	26108	Q9Y3Y4	ENSG00000171016_PYGO1	3.14999	0.441218	12.4528	7.20667e-17	7.0552e-16	28.2068
ENSG00000176387	HSD11B2	3291	NA	ENSG00000176387_HSD11B2	-1.84061	1.80312	-12.447	7.33517e-17	7.17291e-16	28.1219
ENSG00000171889	MIR31HG	NA	NA	ENSG00000171889_MIR31HG	1.68729	2.9232	12.4454	7.3717e-17	7.20456e-16	28.0063
ENSG00000186815	TPCN1	53373	F8VS97	ENSG00000186815_TPCN1	-1.38859	5.76775	-12.4443	7.39597e-17	7.22014e-16	27.5377
ENSG00000174327	SLC16A13	201232	Q7RTY0	ENSG00000174327_SLC16A13	-1.20014	3.56578	-12.4232	7.88454e-17	7.67978e-16	27.8214
ENSG00000259107	LINC00911	100996280	NA	ENSG00000259107_LINC00911	2.91802	-3.36515	12.4206	7.94699e-17	7.73626e-16	27.7995
ENSG00000143178	TBX19	9095	O60806	ENSG00000143178_TBX19	-1.70474	0.376164	-12.4174	8.02544e-17	7.80825e-16	28.1
ENSG00000138472	GUCA1C	9626	C9JNI2	ENSG00000138472_GUCA1C	3.34652	-3.50354	12.4148	8.08865e-17	7.86367e-16	27.7598
ENSG00000196437	ZNF569	148266	Q5MCW4	ENSG00000196437_ZNF569	1.0624	2.04645	12.4133	8.12546e-17	7.89022e-16	27.995
ENSG00000167614	TTYH1	57348	C9J3K6	ENSG00000167614_TTYH1	-5.7323	-2.20783	-12.4111	8.17992e-17	7.93183e-16	27.8639
ENSG00000161395	PGAP3	93210	J3QKU0	ENSG00000161395_PGAP3	-1.13378	2.96362	-12.4078	8.26142e-17	8.00637e-16	27.8671
ENSG00000120471	TP53AIP1	63970	Q9HCN2	ENSG00000120471_TP53AIP1	3.54909	1.79022	12.404	8.35672e-17	8.08516e-16	28.0283
ENSG00000130829	DUSP9	1852	NA	ENSG00000130829_DUSP9	2.07888	0.0681245	12.4042	8.35325e-17	8.08516e-16	28.0576
ENSG00000184867	ARMCX2	9823	Q7L311	ENSG00000184867_ARMCX2	1.03265	4.47342	12.4023	8.39981e-17	8.11779e-16	27.6151
ENSG00000255680	RP11-732A19.9	NA	NA	ENSG00000255680_RP11-732A19.9	3.02369	-2.47748	12.4009	8.43644e-17	8.1441e-16	27.8796
ENSG00000248734	CTD-2260A17.1	NA	NA	ENSG00000248734_CTD-2260A17.1	-3.35348	0.0735184	-12.3986	8.49577e-17	8.19681e-16	28.0441
ENSG00000111261	MANSC1	54682	Q9H8J5	ENSG00000111261_MANSC1	-1.00448	5.16909	-12.3962	8.55835e-17	8.248e-16	27.4781
ENSG00000233237	LINC00472	NA	NA	ENSG00000233237_LINC00472	-1.53985	1.79229	-12.3785	9.03233e-17	8.69518e-16	27.8673
ENSG00000138131	LOXL4	84171	Q96JB6	ENSG00000138131_LOXL4	-3.58709	5.76125	-12.3785	9.03239e-17	8.69518e-16	27.4773
ENSG00000234476	RP11-496N12.6	NA	NA	ENSG00000234476_RP11-496N12.6	-3.21149	-3.26633	-12.3782	9.04074e-17	8.69839e-16	27.7061
ENSG00000163485	ADORA1	134	P30542	ENSG00000163485_ADORA1	-3.87076	1.65574	-12.3769	9.07499e-17	8.72649e-16	27.9649
ENSG00000037965	HOXC8	3224	P31273	ENSG00000037965_HOXC8	1.06588	2.83598	12.3763	9.09242e-17	8.7384e-16	27.7919
ENSG00000167995	BEST1	7439	O76090	ENSG00000167995_BEST1	-2.23475	2.5977	-12.3701	9.26538e-17	8.88984e-16	27.8737
ENSG00000155085	AK9	221264	H7C517	ENSG00000155085_AK9	-1.44669	1.88812	-12.3688	9.3003e-17	8.91841e-16	27.8772
ENSG00000139055	ERP27	121506	Q96DN0	ENSG00000139055_ERP27	-7.141	0.679664	-12.362	9.49482e-17	9.09487e-16	27.8757
ENSG00000184454	NCMAP	400746	Q5T1S8	ENSG00000184454_NCMAP	-5.75094	0.625188	-12.3617	9.50423e-17	9.09886e-16	27.9068
ENSG00000168824	NSG1	27065	P42857	ENSG00000168824_NSG1	2.96884	3.53474	12.3481	9.90753e-17	9.47449e-16	27.6943
ENSG00000100290	BIK	638	Q13323	ENSG00000100290_BIK	-1.68667	2.31691	-12.3459	9.97267e-17	9.52627e-16	27.7899
ENSG00000138640	FAM13A	10144	O94988	ENSG00000138640_FAM13A	-1.107	5.09115	-12.3443	1.00233e-16	9.56936e-16	27.3297
ENSG00000099812	MISP	126353	Q8IVT2	ENSG00000099812_MISP	-2.04974	5.31401	-12.3411	1.01215e-16	9.65307e-16	27.3464
ENSG00000121440	PDZRN3	23024	H7C566	ENSG00000121440_PDZRN3	2.41582	2.64382	12.3371	1.02433e-16	9.76323e-16	27.7048
ENSG00000181513	ACBD4	79777	NA	ENSG00000181513_ACBD4	-1.30981	2.7069	-12.3329	1.03771e-16	9.87993e-16	27.6632
ENSG00000136367	ZFHX2	85446	Q9C0A1	ENSG00000136367_ZFHX2	-2.37509	1.25581	-12.3272	1.0558e-16	1.00466e-15	27.8065
ENSG00000175155	YPEL2	388403	NA	ENSG00000175155_YPEL2	-2.45521	3.08045	-12.3216	1.07405e-16	1.02034e-15	27.6392
ENSG00000180332	KCTD4	386618	Q8WVF5	ENSG00000180332_KCTD4	3.78917	-0.580112	12.317	1.08918e-16	1.03302e-15	27.7497
ENSG00000179431	FJX1	24147	Q86VR8	ENSG00000179431_FJX1	1.15252	5.7715	12.3138	1.09989e-16	1.04261e-15	27.1334
ENSG00000159423	ALDH4A1	8659	P30038	ENSG00000159423_ALDH4A1	1.03724	4.20072	12.3136	1.10056e-16	1.04267e-15	27.3796
ENSG00000106541	AGR2	10551	O95994	ENSG00000106541_AGR2	-4.91674	1.94802	-12.3116	1.10738e-16	1.04799e-15	27.7812
ENSG00000136305	CIDEB	27141	Q9UHD4	ENSG00000136305_CIDEB	1.47497	2.6714	12.3114	1.10802e-16	1.04803e-15	27.6192
ENSG00000188738	FSIP2	401024	Q5CZC0	ENSG00000188738_FSIP2	3.02854	-0.0499925	12.306	1.12644e-16	1.06487e-15	27.764
ENSG00000140450	ARRDC4	91947	Q8NCT1	ENSG00000140450_ARRDC4	-1.80132	5.83841	-12.2967	1.15865e-16	1.09412e-15	27.0883
ENSG00000183770	FOXL2	668	P58012	ENSG00000183770_FOXL2	3.64874	-1.65932	12.2964	1.15975e-16	1.09457e-15	27.6245
ENSG00000110002	VWA5A	4013	O00534	ENSG00000110002_VWA5A	-1.04434	5.49139	-12.2942	1.16776e-16	1.10152e-15	27.1175
ENSG00000230587	AC093609.1	NA	NA	ENSG00000230587_AC093609.1	3.25676	-2.33829	12.2911	1.17868e-16	1.11001e-15	27.5095
ENSG00000128394	APOBEC3F	200316	NA	ENSG00000128394_APOBEC3F	1.43659	2.81977	12.2864	1.19576e-16	1.12487e-15	27.5247
ENSG00000182919	C11orf54	28970	Q9H0W9	ENSG00000182919_C11orf54	-1.21608	3.77704	-12.2777	1.22774e-16	1.15433e-15	27.3099
ENSG00000107099	DOCK8	81704	F8WC95	ENSG00000107099_DOCK8	-2.7281	4.12851	-12.2758	1.23487e-16	1.16041e-15	27.4021
ENSG00000160325	CACFD1	11094	Q9UGQ2	ENSG00000160325_CACFD1	-2.06715	2.22791	-12.2751	1.23784e-16	1.16256e-15	27.5877
ENSG00000257219	RP11-54A9.1	NA	NA	ENSG00000257219_RP11-54A9.1	3.41011	-1.28142	12.2746	1.23967e-16	1.16365e-15	27.5863
ENSG00000163141	BNIPL	149428	Q7Z465	ENSG00000163141_BNIPL	-4.97755	1.06878	-12.2702	1.2562e-16	1.17853e-15	27.6545
ENSG00000205309	NT5M	56953	Q9NPB1	ENSG00000205309_NT5M	3.0032	-1.3128	12.2621	1.2879e-16	1.20566e-15	27.5699
ENSG00000149380	P4HA3	283208	NA	ENSG00000149380_P4HA3	2.11026	-1.11592	12.2579	1.30461e-16	1.22064e-15	27.5505
ENSG00000131018	SYNE1	23345	Q8NF91	ENSG00000131018_SYNE1	1.6497	3.89627	12.2577	1.30541e-16	1.22073e-15	27.3091
ENSG00000104368	PLAT	5327	P00750	ENSG00000104368_PLAT	2.0725	7.63543	12.257	1.3082e-16	1.22202e-15	26.8668
ENSG00000234477	AC004231.2	NA	NA	ENSG00000234477_AC004231.2	-4.48292	-1.86481	-12.2571	1.30778e-16	1.22202e-15	27.4665
ENSG00000116729	WLS	79971	Q5T9L3	ENSG00000116729_WLS	1.11179	6.79266	12.2462	1.35179e-16	1.26206e-15	26.8619
ENSG00000133256	PDE6B	5158	P35913	ENSG00000133256_PDE6B	-2.8929	-1.19791	-12.2453	1.35562e-16	1.26496e-15	27.5122
ENSG00000171617	ENC1	8507	O14682	ENSG00000171617_ENC1	-1.93272	7.60582	-12.2428	1.36612e-16	1.27406e-15	26.8114
ENSG00000136653	NA	NA	NA	ENSG00000136653_NA	-1.44662	3.56703	-12.2424	1.36788e-16	1.27502e-15	27.2675
ENSG00000164855	TMEM184A	202915	Q6ZMB5	ENSG00000164855_TMEM184A	-1.57794	4.10994	-12.236	1.3947e-16	1.29862e-15	27.1466
ENSG00000090376	IRAK3	102465249	Q9Y616	ENSG00000090376_IRAK3	1.76391	3.25748	12.2282	1.4286e-16	1.32947e-15	27.2794
ENSG00000164393	ADGRF2	222611	D6R9E2	ENSG00000164393_ADGRF2	-3.52248	-2.1469	-12.2271	1.4335e-16	1.33332e-15	27.377
ENSG00000164743	C8orf48	157773	Q96LL4	ENSG00000164743_C8orf48	2.39345	-0.723669	12.2241	1.4464e-16	1.34316e-15	27.4855
ENSG00000179528	LBX2	85474	Q6XYB7	ENSG00000179528_LBX2	-3.0291	-3.09601	-12.2238	1.44803e-16	1.34395e-15	27.2516
ENSG00000153982	GDPD1	284161	J3KTA9	ENSG00000153982_GDPD1	-1.84369	0.873603	-12.2228	1.45223e-16	1.34713e-15	27.5051
ENSG00000134198	TSPAN2	10100	O60636	ENSG00000134198_TSPAN2	-6.28802	-0.461237	-12.2213	1.45914e-16	1.35281e-15	27.4263
ENSG00000236453	AC003092.1	NA	NA	ENSG00000236453_AC003092.1	2.78397	-4.07423	12.2136	1.49402e-16	1.38367e-15	27.125
ENSG00000162409	PRKAA2	5563	P54646	ENSG00000162409_PRKAA2	-2.24664	3.73866	-12.207	1.52416e-16	1.41083e-15	27.146
ENSG00000143409	FAM63A	55793	Q8N5J2	ENSG00000143409_FAM63A	-1.0691	5.33564	-12.2058	1.52992e-16	1.4154e-15	26.8719
ENSG00000238164	RP3-395M20.8	NA	NA	ENSG00000238164_RP3-395M20.8	-2.10775	-0.468662	-12.1912	1.60019e-16	1.47962e-15	27.4009
ENSG00000251152	RP11-281P23.1	NA	NA	ENSG00000251152_RP11-281P23.1	-4.32056	-2.38149	-12.1893	1.60937e-16	1.48732e-15	27.2498
ENSG00000003137	CYP26B1	56603	Q9NR63	ENSG00000003137_CYP26B1	4.91554	2.63829	12.189	1.6106e-16	1.48766e-15	27.3888
ENSG00000104490	NCALD	83988	P61601	ENSG00000104490_NCALD	-6.2036	0.595078	-12.1863	1.62434e-16	1.49955e-15	27.3571
ENSG00000154274	C4orf19	55286	Q8IY42	ENSG00000154274_C4orf19	-6.37015	-1.61987	-12.1815	1.64836e-16	1.52092e-15	27.2454
ENSG00000130649	CYP2E1	1571	P05181	ENSG00000130649_CYP2E1	-3.93259	-1.16196	-12.1771	1.67069e-16	1.54059e-15	27.3106
ENSG00000234155	RP11-30P6.6	101928820	NA	ENSG00000234155_RP11-30P6.6	2.03234	-0.498308	12.175	1.68171e-16	1.54921e-15	27.3543
ENSG00000144227	NXPH2	11249	O95156	ENSG00000144227_NXPH2	3.96432	-3.44869	12.1738	1.68741e-16	1.55364e-15	27.0757
ENSG00000144724	PTPRG	5793	NA	ENSG00000144724_PTPRG	1.62719	5.40152	12.1676	1.71981e-16	1.58094e-15	26.7444
ENSG00000167772	ANGPTL4	51129	M0QZ51	ENSG00000167772_ANGPTL4	2.17958	7.21086	12.1644	1.73685e-16	1.59577e-15	26.5837
ENSG00000147206	NXF3	56000	Q9H4D5	ENSG00000147206_NXF3	-4.00593	-2.59971	-12.1614	1.75292e-16	1.60883e-15	27.139
ENSG00000270607	RP11-359E10.1	NA	NA	ENSG00000270607_RP11-359E10.1	3.75829	-2.58333	12.1597	1.76218e-16	1.61647e-15	27.1052
ENSG00000172037	LAMB2	3913	NA	ENSG00000172037_LAMB2	-1.0248	7.4276	-12.1595	1.76341e-16	1.61674e-15	26.5532
ENSG00000100342	APOL1	8542	O14791	ENSG00000100342_APOL1	-2.98117	3.04008	-12.1488	1.82229e-16	1.66719e-15	27.1517
ENSG00000106025	TSPAN12	23554	O95859	ENSG00000106025_TSPAN12	-2.49179	0.962129	-12.1464	1.83558e-16	1.67847e-15	27.2717
ENSG00000139144	PIK3C2G	5288	F5H7Y7	ENSG00000139144_PIK3C2G	1.0866	4.22219	12.1442	1.84809e-16	1.68812e-15	26.8408
ENSG00000130830	MPP1	4354	Q00013	ENSG00000130830_MPP1	1.29665	2.25679	12.144	1.84916e-16	1.68821e-15	27.1527
ENSG00000174514	MFSD4A	148808	A0A087WYZ8	ENSG00000174514_MFSD4A	-2.60113	-0.48299	-12.1436	1.85169e-16	1.68963e-15	27.258
ENSG00000112761	WISP3	8838	O95389	ENSG00000112761_WISP3	2.5595	2.40487	12.1378	1.88496e-16	1.71818e-15	27.1803
ENSG00000172824	CES4A	283848	Q5XG92	ENSG00000172824_CES4A	-1.5452	2.03328	-12.1332	1.91182e-16	1.74175e-15	27.1105
ENSG00000188660	LINC00319	284836	NA	ENSG00000188660_LINC00319	2.98216	-2.61309	12.1328	1.91415e-16	1.74295e-15	27.0468
ENSG00000021355	SERPINB1	1992	P30740	ENSG00000021355_SERPINB1	-1.73859	8.15757	-12.1277	1.94434e-16	1.76951e-15	26.4416
ENSG00000185090	MANEAL	149175	Q5VSG8	ENSG00000185090_MANEAL	-1.83956	1.72926	-12.1245	1.96354e-16	1.78604e-15	27.1491
ENSG00000167702	KIFC2	90990	Q96AC6	ENSG00000167702_KIFC2	-1.1871	4.41229	-12.1205	1.98807e-16	1.80644e-15	26.6684
ENSG00000236830	CBR3-AS1	100506428	NA	ENSG00000236830_CBR3-AS1	-1.85317	0.318293	-12.1202	1.98961e-16	1.80644e-15	27.2017
ENSG00000171631	P2RY6	5031	Q15077	ENSG00000171631_P2RY6	-2.75208	1.64032	-12.1201	1.99013e-16	1.80644e-15	27.1461
ENSG00000179817	MRGPRX4	117196	Q96LA9	ENSG00000179817_MRGPRX4	3.61655	-1.93791	12.1189	1.99777e-16	1.81243e-15	27.0601
ENSG00000226508	AC104655.3	105373984	NA	ENSG00000226508_AC104655.3	3.04364	-2.66793	12.1097	2.05476e-16	1.86121e-15	26.9932
ENSG00000228594	FNDC10	643988	F2Z333	ENSG00000228594_FNDC10	-1.20758	2.67276	-12.109	2.0596e-16	1.86461e-15	26.9711
ENSG00000105538	RASIP1	54922	NA	ENSG00000105538_RASIP1	2.0997	3.9294	12.1087	2.06148e-16	1.86535e-15	26.838
ENSG00000188338	SLC38A3	10991	A0A087WVW8	ENSG00000188338_SLC38A3	-5.06223	-2.70118	-12.1008	2.11188e-16	1.90995e-15	26.8964
ENSG00000156509	FBXO43	286151	Q4G163	ENSG00000156509_FBXO43	2.21305	-0.853668	12.0952	2.14885e-16	1.94136e-15	27.104
ENSG00000178538	CA8	767	P35219	ENSG00000178538_CA8	-6.49715	-0.553387	-12.0936	2.15914e-16	1.94863e-15	27.043
ENSG00000165891	E2F7	144455	Q96AV8	ENSG00000165891_E2F7	1.57431	5.11998	12.0931	2.1627e-16	1.95082e-15	26.5409
ENSG00000055732	MCOLN3	55283	Q8TDD5	ENSG00000055732_MCOLN3	2.35591	2.72555	12.084	2.22395e-16	2.00295e-15	26.9122
ENSG00000186867	QRFPR	84109	F2Z3L3	ENSG00000186867_QRFPR	1.93406	3.48489	12.0781	2.26478e-16	2.03548e-15	26.7978
ENSG00000115255	REEP6	92840	Q96HR9	ENSG00000115255_REEP6	-1.94516	0.904591	-12.0756	2.28231e-16	2.05018e-15	27.0601
ENSG00000183696	UPP1	7378	C9J486	ENSG00000183696_UPP1	1.76923	7.49737	12.0621	2.37939e-16	2.13627e-15	26.2465
ENSG00000138356	AOX1	316	Q06278	ENSG00000138356_AOX1	1.91214	4.93276	12.0608	2.38904e-16	2.14271e-15	26.5164
ENSG00000261068	RP11-7K24.3	NA	NA	ENSG00000261068_RP11-7K24.3	-1.7695	3.46754	-12.0608	2.3889e-16	2.14271e-15	26.753
ENSG00000174792	C4orf26	152816	NA	ENSG00000174792_C4orf26	-5.37028	-1.88004	-12.0563	2.42234e-16	2.17146e-15	26.8896
ENSG00000081803	CADPS2	93664	H0Y8B5	ENSG00000081803_CADPS2	-1.49021	3.76131	-12.0535	2.44348e-16	2.18927e-15	26.6788
ENSG00000140284	SLC27A2	11001	O14975	ENSG00000140284_SLC27A2	-2.65306	1.11326	-12.0493	2.47513e-16	2.21306e-15	26.9717
ENSG00000136842	TMOD1	7111	P28289	ENSG00000136842_TMOD1	-5.31681	-0.00983613	-12.0473	2.49064e-16	2.22463e-15	26.9383
ENSG00000131242	RAB11FIP4	100616248	Q86YS3	ENSG00000131242_RAB11FIP4	-1.23833	3.59865	-12.0453	2.50606e-16	2.23725e-15	26.6709
ENSG00000158473	CD1D	912	P15813	ENSG00000158473_CD1D	4.53162	-0.254583	12.045	2.50795e-16	2.23778e-15	26.9413
ENSG00000257242	LINC01619	256021	NA	ENSG00000257242_LINC01619	-3.39661	-1.12477	-12.0414	2.53605e-16	2.25936e-15	26.9295
ENSG00000170899	GSTA4	2941	NA	ENSG00000170899_GSTA4	1.92791	3.79477	12.0399	2.54753e-16	2.26738e-15	26.6268
ENSG00000186377	CYP4X1	260293	Q8N118	ENSG00000186377_CYP4X1	-3.79185	-1.21944	-12.0391	2.55421e-16	2.27204e-15	26.8821
ENSG00000116035	VAX2	25806	Q9UIW0	ENSG00000116035_VAX2	-3.7056	-1.27913	-12.0312	2.61698e-16	2.32549e-15	26.8485
ENSG00000226738	CTA-384D8.31	NA	NA	ENSG00000226738_CTA-384D8.31	-3.50436	-3.45647	-12.0258	2.66115e-16	2.36353e-15	26.6523
ENSG00000091656	ZFHX4	79776	Q86UP3	ENSG00000091656_ZFHX4	3.34529	-0.277037	12.0209	2.70177e-16	2.39592e-15	26.8845
ENSG00000204021	LIPK	643414	Q5VXJ0	ENSG00000204021_LIPK	-5.00892	0.0553767	-12.0146	2.75494e-16	2.43808e-15	26.8468
ENSG00000233766	AC098617.1	NA	NA	ENSG00000233766_AC098617.1	2.81659	-1.26049	12.0122	2.7752e-16	2.4535e-15	26.7948
ENSG00000119698	PPP4R4	57718	G3V516	ENSG00000119698_PPP4R4	3.98507	-0.218143	12.0068	2.82176e-16	2.49212e-15	26.8404
ENSG00000110375	UPK2	7379	NA	ENSG00000110375_UPK2	-2.99325	-0.836653	-11.9974	2.90509e-16	2.5618e-15	26.791
ENSG00000165215	CLDN3	1365	O15551	ENSG00000165215_CLDN3	-7.0578	-0.604067	-11.9926	2.94901e-16	2.59657e-15	26.7039
ENSG00000197457	STMN3	50861	Q9NZ72	ENSG00000197457_STMN3	2.65005	3.30095	11.9922	2.95189e-16	2.59778e-15	26.5681
ENSG00000259886	NA	NA	NA	ENSG00000259886_NA	1.98094	0.395939	11.9894	2.97791e-16	2.61935e-15	26.805
ENSG00000135299	ANKRD6	22881	Q9Y2G4	ENSG00000135299_ANKRD6	1.28419	3.78215	11.9892	2.98014e-16	2.61957e-15	26.4359
ENSG00000135374	ELF5	2001	Q9UKW6	ENSG00000135374_ELF5	-8.65502	0.404607	-11.989	2.98118e-16	2.61957e-15	26.7146
ENSG00000183688	FAM101B	359845	Q8N5W9	ENSG00000183688_FAM101B	2.81081	4.33248	11.9873	2.99699e-16	2.63212e-15	26.4102
ENSG00000092969	TGFB2	7042	P61812	ENSG00000092969_TGFB2	-1.60192	7.02353	-11.987	2.99975e-16	2.63322e-15	26.0387
ENSG00000215915	ATAD3C	219293	Q5T2N8	ENSG00000215915_ATAD3C	-1.94997	1.659	-11.9866	3.00408e-16	2.63568e-15	26.7328
ENSG00000160712	IL6R	3570	P08887	ENSG00000160712_IL6R	1.5207	5.22813	11.9859	3.01067e-16	2.64012e-15	26.2337
ENSG00000247746	USP51	158880	Q70EK9	ENSG00000247746_USP51	2.93942	-1.72243	11.9813	3.05374e-16	2.67518e-15	26.66
ENSG00000175445	LPL	4023	E7EW14	ENSG00000175445_LPL	-5.6461	2.22109	-11.9783	3.08143e-16	2.69672e-15	26.7611
ENSG00000113448	PDE4D	5144	Q08499	ENSG00000113448_PDE4D	1.23485	3.47768	11.975	3.11304e-16	2.72163e-15	26.435
ENSG00000227039	ITGB2-AS1	100505746	NA	ENSG00000227039_ITGB2-AS1	-2.48618	0.535673	-11.9751	3.11239e-16	2.72163e-15	26.7505
ENSG00000157368	IL34	146433	H3BPB7	ENSG00000157368_IL34	-4.67899	1.37432	-11.9737	3.12585e-16	2.73145e-15	26.7583
ENSG00000116985	BMP8B	656	P34820	ENSG00000116985_BMP8B	-3.9226	-1.40439	-11.9732	3.13134e-16	2.73487e-15	26.6709
ENSG00000179546	HTR1D	3352	P28221	ENSG00000179546_HTR1D	-3.32088	0.291297	-11.9556	3.30661e-16	2.88505e-15	26.6989
ENSG00000160307	S100B	6285	P04271	ENSG00000160307_S100B	-4.92397	0.674815	-11.9507	3.35682e-16	2.92591e-15	26.6862
ENSG00000188051	TMEM221	100130519	A6NGB7	ENSG00000188051_TMEM221	3.48375	-2.73644	11.9318	3.55868e-16	3.09718e-15	26.424
ENSG00000100628	ASB2	51676	Q96Q27	ENSG00000100628_ASB2	2.63187	-0.533486	11.9304	3.57491e-16	3.10974e-15	26.608
ENSG00000144648	ACKR2	1238	NA	ENSG00000144648_ACKR2	-4.78692	-0.228499	-11.9245	3.64075e-16	3.16542e-15	26.5764
ENSG00000120913	PDLIM2	64236	C9JSR2	ENSG00000120913_PDLIM2	-1.04488	4.71985	-11.9201	3.69023e-16	3.20684e-15	26.047
ENSG00000105856	HBP1	26959	O60381	ENSG00000105856_HBP1	-1.10759	5.65326	-11.9191	3.70187e-16	3.21534e-15	25.9319
ENSG00000187950	OVCH1	341350	H0YGY6	ENSG00000187950_OVCH1	3.50495	-2.04692	11.912	3.78442e-16	3.28375e-15	26.4719
ENSG00000250657	RP11-1E6.1	NA	NA	ENSG00000250657_RP11-1E6.1	3.43905	-0.314151	11.9099	3.80866e-16	3.30312e-15	26.5575
ENSG00000178372	CALML5	51806	Q9NZT1	ENSG00000178372_CALML5	-5.05672	-0.678822	-11.9079	3.83227e-16	3.32194e-15	26.4973
ENSG00000106686	SPATA6L	55064	Q9NWF6	ENSG00000106686_SPATA6L	-1.81912	1.06518	-11.9076	3.83683e-16	3.32423e-15	26.5101
ENSG00000154227	CERS3	204219	Q8IU89	ENSG00000154227_CERS3	3.78254	2.55278	11.9065	3.84984e-16	3.33217e-15	26.4696
ENSG00000152953	STK32B	55351	Q9NY57	ENSG00000152953_STK32B	2.9767	-2.1149	11.9048	3.86981e-16	3.34611e-15	26.4234
ENSG00000109511	ANXA10	11199	Q9UJ72	ENSG00000109511_ANXA10	3.50527	-2.69208	11.8901	4.05e-16	3.49669e-15	26.3293
ENSG00000243384	RP11-475O23.2	NA	NA	ENSG00000243384_RP11-475O23.2	-3.39676	-3.64138	-11.8847	4.1192e-16	3.55466e-15	26.1984
ENSG00000133962	CATSPERB	79820	H0YJA5	ENSG00000133962_CATSPERB	-3.69665	-1.1763	-11.873	4.27086e-16	3.6782e-15	26.4135
ENSG00000139209	SLC38A4	55089	Q969I6	ENSG00000139209_SLC38A4	3.74927	-1.57067	11.8711	4.2969e-16	3.69879e-15	26.3443
ENSG00000223403	MEG9	100507257	NA	ENSG00000223403_MEG9	3.76525	-2.13281	11.8658	4.36847e-16	3.75853e-15	26.3348
ENSG00000146192	FGD2	221472	NA	ENSG00000146192_FGD2	-3.38471	-2.32757	-11.8547	4.52175e-16	3.8827e-15	26.2691
ENSG00000182511	FES	2242	C9J3W6	ENSG00000182511_FES	-2.27113	0.590971	-11.8409	4.71913e-16	4.04617e-15	26.3486
ENSG00000256164	CCND2-AS1	103752584	NA	ENSG00000256164_CCND2-AS1	2.73315	-3.03638	11.8389	4.74903e-16	4.06979e-15	26.117
ENSG00000163644	PPM1K	152926	Q8N3J5	ENSG00000163644_PPM1K	-1.26758	4.6898	-11.8386	4.7538e-16	4.07186e-15	25.832
ENSG00000106624	AEBP1	100616346	Q8IUX7	ENSG00000106624_AEBP1	4.84014	3.04952	11.8366	4.78278e-16	4.09467e-15	26.2032
ENSG00000165879	FRAT1	10023	Q92837	ENSG00000165879_FRAT1	-1.65806	0.538376	-11.8324	4.84581e-16	4.14453e-15	26.3232
ENSG00000115758	ODC1	4953	P11926	ENSG00000115758_ODC1	1.5132	7.88285	11.8301	4.88018e-16	4.16776e-15	25.5141
ENSG00000184194	GPR173	54328	Q9NS66	ENSG00000184194_GPR173	3.15503	-0.936752	11.8297	4.88662e-16	4.16915e-15	26.2856
ENSG00000177169	ULK1	8408	O75385	ENSG00000177169_ULK1	-1.09397	5.04145	-11.8231	4.9888e-16	4.25004e-15	25.6891
ENSG00000262061	RP11-1260E13.4	100506388	NA	ENSG00000262061_RP11-1260E13.4	3.88321	-2.40349	11.8199	5.038e-16	4.28774e-15	26.1358
ENSG00000244701	RP5-894A10.2	NA	NA	ENSG00000244701_RP5-894A10.2	-1.58059	0.811267	-11.8105	5.18747e-16	4.41062e-15	26.2268
ENSG00000065989	PDE4A	5141	P27815	ENSG00000065989_PDE4A	-1.83553	1.77586	-11.8087	5.21646e-16	4.43093e-15	26.171
ENSG00000267296	CEBPA-AS1	80054	NA	ENSG00000267296_CEBPA-AS1	3.07151	-2.00889	11.8029	5.31292e-16	4.51065e-15	26.1354
ENSG00000186088	GSAP	54103	NA	ENSG00000186088_GSAP	-1.32919	3.82024	-11.7981	5.39233e-16	4.57583e-15	25.803
ENSG00000238290	RP11-431K24.1	NA	NA	ENSG00000238290_RP11-431K24.1	-3.02713	-2.49231	-11.7893	5.54191e-16	4.69815e-15	26.0467
ENSG00000054793	ATP9A	10079	A0A0A0MR22	ENSG00000054793_ATP9A	-1.9107	5.50491	-11.7882	5.56048e-16	4.71159e-15	25.6024
ENSG00000148082	SHC3	53358	Q92529	ENSG00000148082_SHC3	-3.97374	-0.735098	-11.7813	5.68171e-16	4.81196e-15	26.1493
ENSG00000062282	DGAT2	84649	S4R383	ENSG00000062282_DGAT2	-3.48621	1.08534	-11.7724	5.84134e-16	4.9375e-15	26.1383
ENSG00000245067	IGFBP7-AS1	255130	NA	ENSG00000245067_IGFBP7-AS1	2.98246	-1.80753	11.7712	5.86465e-16	4.95478e-15	26.0494
ENSG00000136002	ARHGEF4	50649	E7EV07	ENSG00000136002_ARHGEF4	1.71647	5.72265	11.7705	5.87658e-16	4.95761e-15	25.4822
ENSG00000164611	PTTG1	9232	O95997	ENSG00000164611_PTTG1	1.25318	5.64567	11.7611	6.05159e-16	5.10277e-15	25.4309
ENSG00000261295	RP11-524D16__A.3	NA	NA	ENSG00000261295_RP11-524D16__A.3	-1.64853	0.399326	-11.7574	6.12139e-16	5.15661e-15	26.0911
ENSG00000242861	RP11-285F7.2	NA	NA	ENSG00000242861_RP11-285F7.2	-2.31985	0.346221	-11.7504	6.2577e-16	5.26376e-15	26.0717
ENSG00000121552	CSTA	1475	P01040	ENSG00000121552_CSTA	2.10779	6.57753	11.7494	6.27631e-16	5.27685e-15	25.3398
ENSG00000229645	NA	NA	NA	ENSG00000229645_NA	3.97735	-0.95342	11.7458	6.34786e-16	5.33442e-15	26.014
ENSG00000160161	CILP2	148113	K7EPJ4	ENSG00000160161_CILP2	-2.86327	0.966876	-11.7402	6.46039e-16	5.42636e-15	26.0367
ENSG00000184254	ALDH1A3	220	H0YKF9	ENSG00000184254_ALDH1A3	-2.07091	10.6558	-11.7396	6.47111e-16	5.43272e-15	25.2054
ENSG00000166821	PEX11A	8800	NA	ENSG00000166821_PEX11A	-1.11361	3.46699	-11.7285	6.70036e-16	5.62246e-15	25.6867
ENSG00000120289	MAGEB4	4115	O15481	ENSG00000120289_MAGEB4	-4.48995	-3.04196	-11.7262	6.74784e-16	5.65956e-15	25.7776
ENSG00000227619	RP11-492E3.2	NA	NA	ENSG00000227619_RP11-492E3.2	-2.93861	-4.01436	-11.7202	6.87574e-16	5.76404e-15	25.6906
ENSG00000118596	SLC16A7	9194	O60669	ENSG00000118596_SLC16A7	1.27458	4.41574	11.7181	6.92142e-16	5.79953e-15	25.4964
ENSG00000172738	TMEM217	221468	Q8N7C4	ENSG00000172738_TMEM217	-1.81158	1.33359	-11.7058	7.19237e-16	6.01784e-15	25.8883
ENSG00000255191	RP11-626H12.1	NA	NA	ENSG00000255191_RP11-626H12.1	3.76586	-3.04506	11.7015	7.28966e-16	6.0963e-15	25.7188
ENSG00000166828	SCNN1G	6340	P51170	ENSG00000166828_SCNN1G	-4.83098	2.86705	-11.7005	7.31283e-16	6.11272e-15	25.8891
ENSG00000108578	BLMH	642	Q13867	ENSG00000108578_BLMH	-2.56747	3.05914	-11.6841	7.6977e-16	6.41895e-15	25.6474
ENSG00000260807	RP11-161M6.2	64788	NA	ENSG00000260807_RP11-161M6.2	-4.16449	-2.35677	-11.6837	7.7071e-16	6.4237e-15	25.7331
ENSG00000259953	RP11-4O1.2	NA	NA	ENSG00000259953_RP11-4O1.2	-1.18442	0.540628	-11.6793	7.81555e-16	6.50782e-15	25.8415
ENSG00000120729	MYOT	9499	A0A0C4DFM5	ENSG00000120729_MYOT	3.11415	-3.12043	11.6768	7.87582e-16	6.55486e-15	25.6459
ENSG00000008513	ST3GAL1	6482	Q11201	ENSG00000008513_ST3GAL1	-1.30426	5.91789	-11.6756	7.90641e-16	6.57716e-15	25.153
ENSG00000121316	PLBD1	79887	Q6P4A8	ENSG00000121316_PLBD1	-3.60935	0.663323	-11.6744	7.93497e-16	6.59775e-15	25.84
ENSG00000101460	MAP1LC3A	84557	Q9H492	ENSG00000101460_MAP1LC3A	-1.75282	1.98231	-11.6704	8.03513e-16	6.67783e-15	25.724
ENSG00000254109	RBPMS-AS1	100128750	NA	ENSG00000254109_RBPMS-AS1	-1.77005	0.386126	-11.6668	8.12801e-16	6.74854e-15	25.8126
ENSG00000188859	FAM78B	149297	H7C3M6	ENSG00000188859_FAM78B	-2.47445	0.211574	-11.6665	8.13478e-16	6.74886e-15	25.8149
ENSG00000196218	RYR1	6261	P21817	ENSG00000196218_RYR1	2.49219	0.365289	11.6655	8.16075e-16	6.766e-15	25.8109
ENSG00000138798	EGF	1950	P01133	ENSG00000138798_EGF	-4.06066	0.104323	-11.6647	8.18213e-16	6.78048e-15	25.8027
ENSG00000261534	RP11-244O19.1	NA	NA	ENSG00000261534_RP11-244O19.1	2.89423	1.81114	11.6624	8.23937e-16	6.82466e-15	25.7299
ENSG00000213398	LCAT	3931	P04180	ENSG00000213398_LCAT	1.22854	2.0929	11.6586	8.33981e-16	6.90126e-15	25.5871
ENSG00000100146	SOX10	6663	H0Y5N4	ENSG00000100146_SOX10	-7.93332	2.36397	-11.6564	8.39749e-16	6.94275e-15	25.7753
ENSG00000140986	RPL3L	6123	Q92901	ENSG00000140986_RPL3L	3.66997	-2.86067	11.6442	8.72265e-16	7.19743e-15	25.5301
ENSG00000170919	TPT1-AS1	NA	NA	ENSG00000170919_TPT1-AS1	-2.10255	2.87497	-11.6395	8.85285e-16	7.29444e-15	25.459
ENSG00000157601	MX1	4599	NA	ENSG00000157601_MX1	-2.51595	3.72248	-11.6329	9.03896e-16	7.44426e-15	25.4151
ENSG00000231999	FLJ27354	400761	NA	ENSG00000231999_FLJ27354	2.70934	-2.07409	11.6295	9.13566e-16	7.52032e-15	25.6084
ENSG00000184058	TBX1	6899	O43435	ENSG00000184058_TBX1	3.39906	-2.10753	11.6201	9.40975e-16	7.73859e-15	25.5658
ENSG00000160188	RSPH1	89765	NA	ENSG00000160188_RSPH1	-3.13335	-1.3299	-11.614	9.59042e-16	7.88343e-15	25.5925
ENSG00000162976	PQLC3	130814	C9J4B6	ENSG00000162976_PQLC3	-1.10617	3.79046	-11.6135	9.60505e-16	7.89172e-15	25.2757
ENSG00000145569	FAM105A	54491	Q9NUU6	ENSG00000145569_FAM105A	1.84878	-0.1888	11.6128	9.62744e-16	7.90636e-15	25.6483
ENSG00000259985	RP11-549B18.1	NA	NA	ENSG00000259985_RP11-549B18.1	1.16692	0.56899	11.6096	9.72389e-16	7.98179e-15	25.6282
ENSG00000171680	PLEKHG5	57449	NA	ENSG00000171680_PLEKHG5	1.53203	5.81489	11.607	9.80512e-16	8.04465e-15	24.9222
ENSG00000137501	SYTL2	54843	E9PIB5	ENSG00000137501_SYTL2	-1.98234	5.42	-11.6066	9.81697e-16	8.05057e-15	25.0184
ENSG00000185133	INPP5J	27124	NA	ENSG00000185133_INPP5J	-1.5953	0.871156	-11.6037	9.90514e-16	8.11903e-15	25.5846
ENSG00000197183	NOL4L	140688	Q96MY1	ENSG00000197183_NOL4L	-1.65628	3.99596	-11.6029	9.93091e-16	8.1363e-15	25.1782
ENSG00000196344	ADH7	131	A0A0C4DG85	ENSG00000196344_ADH7	-2.8539	-3.56473	-11.5944	1.01999e-15	8.35275e-15	25.3539
ENSG00000053747	LAMA3	3909	Q16787	ENSG00000053747_LAMA3	1.58928	10.3747	11.585	1.05052e-15	8.57841e-15	24.713
ENSG00000155629	PIK3AP1	118788	Q6ZUJ8	ENSG00000155629_PIK3AP1	-4.1987	-2.28373	-11.5748	1.08475e-15	8.84959e-15	25.3939
ENSG00000144476	ACKR3	57007	A0A140T9K6	ENSG00000144476_ACKR3	5.16544	1.03869	11.5648	1.11958e-15	9.12083e-15	25.5001
ENSG00000259178	CTD-2184D3.3	NA	NA	ENSG00000259178_CTD-2184D3.3	2.35649	-3.78497	11.5614	1.13164e-15	9.21474e-15	25.2093
ENSG00000272931	RP5-943J3.2	NA	NA	ENSG00000272931_RP5-943J3.2	-3.47146	-1.67166	-11.5513	1.16814e-15	9.49857e-15	25.3687
ENSG00000164199	ADGRV1	84059	D6RIF0	ENSG00000164199_ADGRV1	-3.80199	-1.71625	-11.5484	1.17883e-15	9.58107e-15	25.3667
ENSG00000238117	AP004372.1	NA	NA	ENSG00000238117_AP004372.1	3.23842	-2.98237	11.548	1.18027e-15	9.58825e-15	25.2532
ENSG00000259498	RP11-244F12.3	NA	NA	ENSG00000259498_RP11-244F12.3	-2.14691	-0.797421	-11.5417	1.2039e-15	9.77108e-15	25.4164
ENSG00000091844	RGS17	26575	Q9UGC6	ENSG00000091844_RGS17	3.93182	0.0290567	11.5371	1.22134e-15	9.90794e-15	25.4045
ENSG00000214193	SH3D21	79729	B5MDU9	ENSG00000214193_SH3D21	-1.23703	5.21421	-11.5369	1.22225e-15	9.91065e-15	24.7225
ENSG00000255874	LINC00346	283487	NA	ENSG00000255874_LINC00346	-2.80643	-2.39077	-11.535	1.22969e-15	9.96632e-15	25.2876
ENSG00000138190	EXOC6	54536	B1AP46	ENSG00000138190_EXOC6	-1.09531	4.19904	-11.5281	1.25645e-15	1.0169e-14	24.9081
ENSG00000140511	HAPLN3	145864	Q96S86	ENSG00000140511_HAPLN3	-1.54896	3.36025	-11.528	1.2572e-15	1.01703e-14	25.094
ENSG00000164379	FOXQ1	94234	Q9C009	ENSG00000164379_FOXQ1	-3.4929	3.09562	-11.5213	1.28396e-15	1.03771e-14	25.188
ENSG00000198934	MAGEE1	57692	Q9HCI5	ENSG00000198934_MAGEE1	1.08636	2.25816	11.5147	1.31101e-15	1.05809e-14	25.184
ENSG00000137561	TTPA	7274	NA	ENSG00000137561_TTPA	-3.15618	-3.21503	-11.5065	1.34504e-15	1.08454e-14	25.1084
ENSG00000235947	EGOT	100126791	NA	ENSG00000235947_EGOT	-3.18524	-3.16185	-11.4993	1.37589e-15	1.10839e-14	25.1458
ENSG00000070540	WIPI1	55062	K7EKN0	ENSG00000070540_WIPI1	-1.0658	4.97948	-11.4988	1.37832e-15	1.10983e-14	24.708
ENSG00000184792	OSBP2	23762	Q969R2	ENSG00000184792_OSBP2	1.95677	6.20068	11.4945	1.39703e-15	1.12437e-14	24.5589
ENSG00000113140	SPARC	6678	P09486	ENSG00000113140_SPARC	1.8166	8.42531	11.4852	1.43886e-15	1.15589e-14	24.4131
ENSG00000160111	CPAMD8	27151	Q8IZJ3	ENSG00000160111_CPAMD8	-3.6565	1.43036	-11.4832	1.4479e-15	1.16261e-14	25.2202
ENSG00000272711	RP11-259N19.1	NA	NA	ENSG00000272711_RP11-259N19.1	1.00626	2.11887	11.4657	1.53022e-15	1.22474e-14	25.0635
ENSG00000196460	RFX8	731220	E9PDA6	ENSG00000196460_RFX8	3.19597	-1.52279	11.4641	1.53784e-15	1.23027e-14	25.1595
ENSG00000250934	RP11-71E19.1	NA	NA	ENSG00000250934_RP11-71E19.1	3.05151	-2.60474	11.4626	1.5451e-15	1.23551e-14	25.05
ENSG00000158486	DNAH3	55567	Q8TD57	ENSG00000158486_DNAH3	2.82289	-2.07498	11.4614	1.55086e-15	1.23886e-14	25.0767
ENSG00000125967	NECAB3	63941	NA	ENSG00000125967_NECAB3	-1.11465	2.88569	-11.4612	1.55186e-15	1.23886e-14	24.8982
ENSG00000127507	ADGRE2	30817	Q9UHX3	ENSG00000127507_ADGRE2	-1.77614	5.34241	-11.4612	1.55215e-15	1.23886e-14	24.5331
ENSG00000141750	STAC2	342667	Q6ZMT1	ENSG00000141750_STAC2	-5.79667	-0.22328	-11.4555	1.58011e-15	1.2606e-14	25.1161
ENSG00000143867	OSR1	130497	Q8TAX0	ENSG00000143867_OSR1	1.92863	5.42103	11.4491	1.61229e-15	1.28509e-14	24.5213
ENSG00000176383	B3GNT4	79369	Q9C0J1	ENSG00000176383_B3GNT4	-1.1101	1.89798	-11.4404	1.65764e-15	1.31941e-14	24.9855
ENSG00000184588	PDE4B	5142	Q07343	ENSG00000184588_PDE4B	-4.04792	3.53963	-11.4336	1.69342e-15	1.34603e-14	24.8713
ENSG00000164841	TMEM74	157753	NA	ENSG00000164841_TMEM74	2.59313	-1.83858	11.4323	1.70045e-15	1.35038e-14	25.0256
ENSG00000139112	GABARAPL1	23710	F5H007	ENSG00000139112_GABARAPL1	-1.28515	5.14543	-11.4324	1.70009e-15	1.35038e-14	24.478
ENSG00000112294	ALDH5A1	7915	P51649	ENSG00000112294_ALDH5A1	-1.90426	2.20051	-11.4304	1.71046e-15	1.35772e-14	24.9464
ENSG00000163040	CCDC74A	90557	NA	ENSG00000163040_CCDC74A	2.1275	1.13687	11.43	1.71284e-15	1.35898e-14	25.0388
ENSG00000076641	PAG1	55824	Q9NWQ8	ENSG00000076641_PAG1	3.64245	0.640117	11.4294	1.71601e-15	1.36087e-14	25.0788
ENSG00000087303	NID2	22795	Q14112	ENSG00000087303_NID2	2.11924	5.28097	11.4215	1.75932e-15	1.39394e-14	24.4204
ENSG00000115112	TFCP2L1	29842	Q9NZI6	ENSG00000115112_TFCP2L1	-1.40782	8.8921	-11.4214	1.76028e-15	1.39407e-14	24.1969
ENSG00000254416	RP11-347E10.1	NA	NA	ENSG00000254416_RP11-347E10.1	-3.53062	-3.52649	-11.4136	1.80392e-15	1.42732e-14	24.7936
ENSG00000129682	FGF13	2258	Q92913	ENSG00000129682_FGF13	-4.05439	-1.08583	-11.399	1.88943e-15	1.49226e-14	24.9376
ENSG00000146592	CREB5	9586	Q02930	ENSG00000146592_CREB5	1.1875	4.30178	11.3935	1.92275e-15	1.51719e-14	24.4414
ENSG00000082929	LINC01587	10141	NA	ENSG00000082929_LINC01587	-3.61596	-2.6342	-11.387	1.96273e-15	1.54803e-14	24.8046
ENSG00000215018	COL28A1	340267	H7C3P2	ENSG00000215018_COL28A1	-3.66893	-2.20696	-11.3827	1.98985e-15	1.5687e-14	24.8386
ENSG00000183914	DNAH2	146754	Q9P225	ENSG00000183914_DNAH2	1.46772	2.2878	11.3805	2.00351e-15	1.57875e-14	24.7662
ENSG00000240204	SMKR1	100287482	H3BMG3	ENSG00000240204_SMKR1	-2.01666	0.438125	-11.3778	2.02072e-15	1.59159e-14	24.9139
ENSG00000138670	RASGEF1B	153020	Q0VAM2	ENSG00000138670_RASGEF1B	-2.47537	1.51177	-11.3756	2.03502e-15	1.6014e-14	24.8421
ENSG00000267710	AC006116.20	NA	NA	ENSG00000267710_AC006116.20	3.14799	-1.23302	11.3714	2.06193e-15	1.62184e-14	24.8751
ENSG00000124256	ZBP1	81030	Q9H171	ENSG00000124256_ZBP1	-2.71017	-3.98416	-11.3708	2.06615e-15	1.62442e-14	24.637
ENSG00000078401	EDN1	1906	P05305	ENSG00000078401_EDN1	-2.52748	4.11708	-11.3648	2.10568e-15	1.65325e-14	24.4862
ENSG00000189157	FAM47E	100129583	Q6ZV65	ENSG00000189157_FAM47E	-3.19518	-2.03341	-11.364	2.11127e-15	1.65613e-14	24.8087
ENSG00000101230	ISM1	140862	B1AKI9	ENSG00000101230_ISM1	4.17136	0.880464	11.3607	2.13344e-15	1.67277e-14	24.8638
ENSG00000089723	OTUB2	78990	Q96DC9	ENSG00000089723_OTUB2	-1.16989	4.24694	-11.3588	2.14651e-15	1.68149e-14	24.3723
ENSG00000214548	MEG3	55384	NA	ENSG00000214548_MEG3	3.4226	3.94694	11.3585	2.14833e-15	1.68216e-14	24.465
ENSG00000257718	RP11-396F22.1	NA	NA	ENSG00000257718_RP11-396F22.1	3.28754	-3.47703	11.3542	2.17791e-15	1.70302e-14	24.6568
ENSG00000088538	DOCK3	1795	Q8IZD9	ENSG00000088538_DOCK3	-2.78562	0.776875	-11.3543	2.177e-15	1.70302e-14	24.8259
ENSG00000204542	C6orf15	29113	Q6UXA7	ENSG00000204542_C6orf15	-7.8782	2.1546	-11.354	2.17904e-15	1.70313e-14	24.8315
ENSG00000236107	AC010127.3	102724058	NA	ENSG00000236107_AC010127.3	3.04923	-1.0906	11.3537	2.18121e-15	1.70406e-14	24.8062
ENSG00000272666	CTA-384D8.35	105373098	NA	ENSG00000272666_CTA-384D8.35	-2.99766	-1.10118	-11.3528	2.18746e-15	1.70817e-14	24.8122
ENSG00000230439	RP11-488P3.1	NA	NA	ENSG00000230439_RP11-488P3.1	2.11751	4.02939	11.3481	2.22022e-15	1.73142e-14	24.426
ENSG00000112208	BAG2	9532	O95816	ENSG00000112208_BAG2	1.1848	4.85445	11.3332	2.3278e-15	1.81368e-14	24.1732
ENSG00000161243	FBXO27	126433	M0R0I8	ENSG00000161243_FBXO27	1.228	3.97727	11.328	2.36652e-15	1.84301e-14	24.3384
ENSG00000164411	GJB7	375519	Q6PEY0	ENSG00000164411_GJB7	-3.82211	-3.4186	-11.3164	2.456e-15	1.90841e-14	24.5226
ENSG00000133315	MACROD1	28992	Q9BQ69	ENSG00000133315_MACROD1	-1.15233	2.64474	-11.3097	2.50843e-15	1.94741e-14	24.4704
ENSG00000140853	NLRC5	84166	Q86WI3	ENSG00000140853_NLRC5	-1.23682	4.07371	-11.3061	2.53767e-15	1.96834e-14	24.1839
ENSG00000170381	SEMA3E	9723	O15041	ENSG00000170381_SEMA3E	-3.93834	2.83558	-11.2948	2.63026e-15	2.03742e-14	24.5254
ENSG00000127585	FBXL16	146330	NA	ENSG00000127585_FBXL16	-2.59942	0.870247	-11.287	2.69606e-15	2.08559e-14	24.6249
ENSG00000143412	ANXA9	8416	O76027	ENSG00000143412_ANXA9	-2.57096	-0.0154453	-11.2764	2.78908e-15	2.15467e-14	24.6014
ENSG00000142606	MMEL1	79258	J3KRD2	ENSG00000142606_MMEL1	-2.51633	-1.04004	-11.2744	2.80696e-15	2.16751e-14	24.5597
ENSG00000175764	TTLL11	158135	NA	ENSG00000175764_TTLL11	1.41117	2.83714	11.2721	2.82711e-15	2.1821e-14	24.3378
ENSG00000260604	RP1-140K8.5	NA	NA	ENSG00000260604_RP1-140K8.5	-3.91703	-1.03869	-11.2694	2.85175e-15	2.20014e-14	24.5655
ENSG00000196408	NOXO1	124056	NA	ENSG00000196408_NOXO1	-3.67627	0.833344	-11.2682	2.8624e-15	2.20737e-14	24.5713
ENSG00000250254	PTTG2	10744	Q9NZH5	ENSG00000250254_PTTG2	1.28229	2.95295	11.2639	2.90189e-15	2.23584e-14	24.2915
ENSG00000175592	FOSL1	8061	P15407	ENSG00000175592_FOSL1	1.24061	6.44563	11.2551	2.98416e-15	2.29617e-14	23.7336
ENSG00000140067	FAM181A	90050	Q8N9Y4	ENSG00000140067_FAM181A	3.28757	-3.56952	11.2541	2.99408e-15	2.30277e-14	24.3306
ENSG00000181085	MAPK15	225689	Q8TD08	ENSG00000181085_MAPK15	-2.43604	-0.738933	-11.2497	3.03654e-15	2.33336e-14	24.5155
ENSG00000168309	FAM107A	11170	O95990	ENSG00000168309_FAM107A	-6.98153	-1.10789	-11.2477	3.05599e-15	2.34726e-14	24.4258
ENSG00000116717	GADD45A	1647	P24522	ENSG00000116717_GADD45A	1.06194	5.61928	11.2428	3.10412e-15	2.38106e-14	23.7855
ENSG00000100979	PLTP	5360	P55058	ENSG00000100979_PLTP	1.75508	4.93408	11.2399	3.13295e-15	2.40105e-14	23.9253
ENSG00000148225	WDR31	114987	Q8NA23	ENSG00000148225_WDR31	-1.36922	2.43303	-11.2327	3.20538e-15	2.45114e-14	24.306
ENSG00000134285	FKBP11	51303	NA	ENSG00000134285_FKBP11	1.05226	4.3901	11.2323	3.20918e-15	2.45296e-14	23.8815
ENSG00000254703	SENCR	100507392	NA	ENSG00000254703_SENCR	3.47622	-1.33383	11.2254	3.28088e-15	2.50445e-14	24.374
ENSG00000165626	BEND7	222389	NA	ENSG00000165626_BEND7	-1.72852	2.67927	-11.2135	3.40799e-15	2.60034e-14	24.1642
ENSG00000143502	SUSD4	55061	Q5VX71	ENSG00000143502_SUSD4	-2.43648	1.92122	-11.2076	3.4729e-15	2.64753e-14	24.3028
ENSG00000183317	EPHA10	284656	H0YER4	ENSG00000183317_EPHA10	-3.26771	-3.27298	-11.2062	3.48785e-15	2.65776e-14	24.2142
ENSG00000257127	CLLU1	574028	NA	ENSG00000257127_CLLU1	-2.60031	-4.01348	-11.1999	3.55862e-15	2.7093e-14	24.1064
ENSG00000165914	TTC7B	145567	Q86TV6	ENSG00000165914_TTC7B	1.91311	2.68693	11.1722	3.88882e-15	2.95421e-14	24.0617
ENSG00000025039	RRAGD	58528	Q9NQL2	ENSG00000025039_RRAGD	-3.06956	0.313909	-11.1699	3.91774e-15	2.97487e-14	24.2638
ENSG00000171766	GATM	2628	P50440	ENSG00000171766_GATM	-2.25748	0.788515	-11.163	4.004e-15	3.03839e-14	24.2182
ENSG00000187556	NANOS3	342977	NA	ENSG00000187556_NANOS3	-3.16691	-2.84419	-11.1625	4.01033e-15	3.04118e-14	24.1038
ENSG00000263082	CTD-2034I21.2	102724940	NA	ENSG00000263082_CTD-2034I21.2	3.31002	-2.24483	11.1588	4.059e-15	3.07675e-14	24.16
ENSG00000006042	TMEM98	26022	Q9Y2Y6	ENSG00000006042_TMEM98	1.71572	3.9976	11.1571	4.08076e-15	3.09045e-14	23.8275
ENSG00000065325	GLP2R	9340	I3L0P5	ENSG00000065325_GLP2R	-3.24605	-2.55836	-11.157	4.08197e-15	3.09045e-14	24.1179
ENSG00000174123	TLR10	81793	Q9BXR5	ENSG00000174123_TLR10	-4.2945	-2.87833	-11.157	4.08244e-15	3.09045e-14	24.0798
ENSG00000184709	LRRC26	389816	Q2I0M4	ENSG00000184709_LRRC26	-3.80636	-3.075	-11.1554	4.10255e-15	3.10432e-14	24.0507
ENSG00000101849	TBL1X	6907	C9JP56	ENSG00000101849_TBL1X	-3.08018	1.78102	-11.1432	4.26654e-15	3.22418e-14	24.0859
ENSG00000157703	SVOPL	136306	Q8N434	ENSG00000157703_SVOPL	-3.56965	-3.00847	-11.1383	4.33356e-15	3.27147e-14	24.0248
ENSG00000225361	PPP1R26-AS1	100506599	NA	ENSG00000225361_PPP1R26-AS1	-1.28147	0.206863	-11.136	4.36611e-15	3.29192e-14	24.1411
ENSG00000069712	KIAA1107	23285	NA	ENSG00000069712_KIAA1107	-1.40497	2.10503	-11.135	4.37923e-15	3.29927e-14	24.0073
ENSG00000172935	MRGPRF	116535	Q96AM1	ENSG00000172935_MRGPRF	3.43201	-2.64605	11.1346	4.38501e-15	3.3022e-14	24.0231
ENSG00000259658	RP11-89K11.1	NA	NA	ENSG00000259658_RP11-89K11.1	2.48887	-3.84056	11.1342	4.3908e-15	3.30512e-14	23.9482
ENSG00000185339	TCN2	6948	P20062	ENSG00000185339_TCN2	-2.11006	2.48266	-11.1312	4.43374e-15	3.33599e-14	24.0066
ENSG00000000971	CFH	3075	P08603	ENSG00000000971_CFH	4.45179	2.16087	11.1201	4.59434e-15	3.45233e-14	24.0523
ENSG00000133401	PDZD2	23037	O15018	ENSG00000133401_PDZD2	-3.25824	4.10956	-11.1105	4.73703e-15	3.55338e-14	23.7016
ENSG00000149548	CCDC15	80071	E9PKB1	ENSG00000149548_CCDC15	1.23855	2.77389	11.1047	4.82591e-15	3.61849e-14	23.8042
ENSG00000172005	MAL	4118	NA	ENSG00000172005_MAL	-6.30643	-1.54265	-11.1043	4.83307e-15	3.6223e-14	23.9575
ENSG00000182983	ZNF662	389114	Q6ZS27	ENSG00000182983_ZNF662	-1.42789	1.69307	-11.0963	4.95858e-15	3.71315e-14	23.8747
ENSG00000185352	HS6ST3	266722	Q8IZP7	ENSG00000185352_HS6ST3	-3.31975	-3.43805	-11.0909	5.04404e-15	3.77551e-14	23.846
ENSG00000117228	GBP1	2633	P32455	ENSG00000117228_GBP1	-1.13845	4.9862	-11.0899	5.0607e-15	3.78634e-14	23.3756
ENSG00000160606	TLCD1	116238	Q96CP7	ENSG00000160606_TLCD1	-1.19949	2.98156	-11.0895	5.06746e-15	3.78977e-14	23.739
ENSG00000205667	ARSH	347527	Q5FYA8	ENSG00000205667_ARSH	-3.10108	-3.68346	-11.0718	5.36253e-15	4.00008e-14	23.764
ENSG00000110076	NRXN2	9379	NA	ENSG00000110076_NRXN2	4.11185	-1.27866	11.0693	5.40736e-15	4.03083e-14	23.9256
ENSG00000188060	RAB42	115273	Q8N4Z0	ENSG00000188060_RAB42	-3.02558	-0.08173	-11.0692	5.4084e-15	4.03083e-14	23.9494
ENSG00000242265	PEG10	23089	Q86TG7	ENSG00000242265_PEG10	1.55266	7.8703	11.0682	5.42552e-15	4.04185e-14	23.0779
ENSG00000214960	ISPD	729920	A4D126	ENSG00000214960_ISPD	-1.26909	1.43973	-11.065	5.48179e-15	4.08026e-14	23.8464
ENSG00000064687	ABCA7	10347	A0A087WUR5	ENSG00000064687_ABCA7	-1.33183	4.64129	-11.0595	5.5798e-15	4.14787e-14	23.3299
ENSG00000130921	C12orf65	91574	Q9H3J6	ENSG00000130921_C12orf65	1.00083	3.78987	11.0567	5.63023e-15	4.18176e-14	23.5079
ENSG00000134222	PSRC1	84722	Q6PGN9	ENSG00000134222_PSRC1	1.50224	4.46114	11.0563	5.63718e-15	4.18514e-14	23.3488
ENSG00000121858	TNFSF10	8743	P50591	ENSG00000121858_TNFSF10	-2.80924	4.6004	-11.0487	5.77639e-15	4.28665e-14	23.4188
ENSG00000246090	RP11-696N14.1	100507053	NA	ENSG00000246090_RP11-696N14.1	1.24793	1.50719	11.0481	5.78722e-15	4.29285e-14	23.7426
ENSG00000067798	NAV3	89795	NA	ENSG00000067798_NAV3	2.54874	3.90352	11.0434	5.87588e-15	4.35675e-14	23.4931
ENSG00000186409	CCDC30	728621	NA	ENSG00000186409_CCDC30	-2.06553	-0.782067	-11.0291	6.15275e-15	4.55814e-14	23.8169
ENSG00000101977	MCF2	4168	P10911	ENSG00000101977_MCF2	3.7452	1.11924	11.0235	6.26331e-15	4.63806e-14	23.7707
ENSG00000175147	TMEM51-AS1	200197	NA	ENSG00000175147_TMEM51-AS1	-2.47202	0.336429	-11.017	6.39621e-15	4.73041e-14	23.7678
ENSG00000260877	RP11-211G23.2	NA	NA	ENSG00000260877_RP11-211G23.2	-3.97425	-3.43721	-11.0157	6.42276e-15	4.74802e-14	23.6197
ENSG00000134533	RERG	85004	Q96A58	ENSG00000134533_RERG	-6.82878	0.420951	-11.0005	6.74511e-15	4.97358e-14	23.7106
ENSG00000249116	CTD-2194D22.3	NA	NA	ENSG00000249116_CTD-2194D22.3	2.17725	-0.921173	10.9982	6.79465e-15	5.00798e-14	23.7104
ENSG00000176678	FOXL1	2300	M0R279	ENSG00000176678_FOXL1	2.20138	2.0302	10.9908	6.95933e-15	5.12282e-14	23.5633
ENSG00000205890	RP11-473M20.5	100128770	NA	ENSG00000205890_RP11-473M20.5	-3.46615	-3.34457	-10.9869	7.04638e-15	5.1847e-14	23.5457
ENSG00000185551	NR2F2	100302258	P24468	ENSG00000185551_NR2F2	-1.03222	5.85768	-10.9849	7.09121e-15	5.21547e-14	22.915
ENSG00000223784	RP11-554I8.2	NA	NA	ENSG00000223784_RP11-554I8.2	1.54446	3.61995	10.9839	7.11511e-15	5.23083e-14	23.2733
ENSG00000173281	PPP1R3B	79660	Q86XI6	ENSG00000173281_PPP1R3B	-1.53273	5.14091	-10.9822	7.15486e-15	5.25782e-14	23.0413
ENSG00000273143	RP11-525A16.4	NA	NA	ENSG00000273143_RP11-525A16.4	2.51144	-1.51228	10.9807	7.18959e-15	5.2811e-14	23.6431
ENSG00000164129	NPY5R	4889	Q15761	ENSG00000164129_NPY5R	-4.22259	-3.63144	-10.9761	7.29707e-15	5.35551e-14	23.4689
ENSG00000189221	MAOA	4128	P21397	ENSG00000189221_MAOA	2.12918	5.01651	10.9674	7.50448e-15	5.50074e-14	23.0506
ENSG00000174326	SLC16A11	162515	Q8NCK7	ENSG00000174326_SLC16A11	-3.32606	-2.84309	-10.9663	7.53124e-15	5.51803e-14	23.5167
ENSG00000165072	MAMDC2	256691	Q7Z304	ENSG00000165072_MAMDC2	1.86548	3.86218	10.9647	7.57021e-15	5.54423e-14	23.228
ENSG00000100321	SYNGR1	9145	O43759	ENSG00000100321_SYNGR1	-5.33155	0.885805	-10.9621	7.63376e-15	5.58842e-14	23.61
ENSG00000230978	LINC00160	54064	NA	ENSG00000230978_LINC00160	-2.78829	-3.71982	-10.9615	7.64795e-15	5.59644e-14	23.4221
ENSG00000166963	MAP1A	4130	E9PGC8	ENSG00000166963_MAP1A	2.23139	0.151685	10.9586	7.71835e-15	5.64206e-14	23.5968
ENSG00000178726	THBD	7056	P07204	ENSG00000178726_THBD	3.24315	3.12603	10.9576	7.74382e-15	5.65227e-14	23.3906
ENSG00000162946	DISC1	27185	Q9NRI5	ENSG00000162946_DISC1	-2.28645	-0.801011	-10.9577	7.7423e-15	5.65227e-14	23.5883
ENSG00000100078	PLA2G3	50487	Q9NZ20	ENSG00000100078_PLA2G3	-4.01874	-1.30933	-10.9558	7.78998e-15	5.68357e-14	23.569
ENSG00000151575	TEX9	374618	H0YKG1	ENSG00000151575_TEX9	-1.43219	2.01612	-10.9549	7.8114e-15	5.6968e-14	23.432
ENSG00000167741	GGT6	124975	Q6P531	ENSG00000167741_GGT6	-3.81817	2.38718	-10.9529	7.86243e-15	5.7316e-14	23.4875
ENSG00000224945	RP11-82L18.2	NA	NA	ENSG00000224945_RP11-82L18.2	-3.61212	-1.86387	-10.95	7.93717e-15	5.78366e-14	23.5487
ENSG00000243491	RP11-521D12.5	NA	NA	ENSG00000243491_RP11-521D12.5	3.6723	-1.96481	10.9469	8.01628e-15	5.83884e-14	23.4897
ENSG00000242732	RGAG4	340526	Q5HYW3	ENSG00000242732_RGAG4	2.47076	-1.07936	10.9384	8.23794e-15	5.99634e-14	23.5159
ENSG00000273132	RP11-350J20.12	NA	NA	ENSG00000273132_RP11-350J20.12	-2.77153	-0.788466	-10.9384	8.23944e-15	5.99634e-14	23.526
ENSG00000140557	ST8SIA2	8128	Q92186	ENSG00000140557_ST8SIA2	4.79333	-0.0831194	10.9375	8.26339e-15	6.01125e-14	23.5282
ENSG00000163762	TM4SF18	116441	Q96CE8	ENSG00000163762_TM4SF18	-8.02497	-1.31968	-10.936	8.3033e-15	6.03775e-14	23.4565
ENSG00000165140	FBP1	2203	P09467	ENSG00000165140_FBP1	-7.22154	-0.106612	-10.9273	8.53908e-15	6.1988e-14	23.4604
ENSG00000142494	SLC47A1	55244	NA	ENSG00000142494_SLC47A1	4.44472	-2.06358	10.9208	8.7191e-15	6.32417e-14	23.4071
ENSG00000197121	PGAP1	80055	Q75T13	ENSG00000197121_PGAP1	1.06353	4.57924	10.9192	8.76694e-15	6.3509e-14	22.8693
ENSG00000142623	PADI1	29943	Q9ULC6	ENSG00000142623_PADI1	-4.72864	0.931522	-10.9135	8.92732e-15	6.46168e-14	23.445
ENSG00000135917	SLC19A3	80704	Q9BZV2	ENSG00000135917_SLC19A3	-1.96669	0.226594	-10.9105	9.01525e-15	6.5226e-14	23.439
ENSG00000178826	TMEM139	135932	Q8IV31	ENSG00000178826_TMEM139	-1.43583	4.30087	-10.9039	9.20883e-15	6.65432e-14	22.9363
ENSG00000099957	P2RX6	9127	NA	ENSG00000099957_P2RX6	3.58424	-0.839729	10.9036	9.21892e-15	6.65883e-14	23.413
ENSG00000143153	ATP1B1	481	P05026	ENSG00000143153_ATP1B1	-1.16978	7.4492	-10.9014	9.28355e-15	6.70272e-14	22.5481
ENSG00000141542	RAB40B	10966	Q12829	ENSG00000141542_RAB40B	-1.24791	4.02504	-10.8994	9.3456e-15	6.74471e-14	22.9329
ENSG00000117122	MFAP2	4237	P55001	ENSG00000117122_MFAP2	2.1617	3.52774	10.8878	9.70108e-15	6.98962e-14	23.0022
ENSG00000130584	ZBTB46	140685	Q86UZ6	ENSG00000130584_ZBTB46	-1.9964	-0.744495	-10.8692	1.03034e-14	7.399e-14	23.3055
ENSG00000197943	PLCG2	5336	H3BQV5	ENSG00000197943_PLCG2	-3.80451	3.73827	-10.8597	1.06257e-14	7.62413e-14	22.9995
ENSG00000131686	CA6	765	F8W148	ENSG00000131686_CA6	-5.05072	-2.1905	-10.8588	1.06541e-14	7.6413e-14	23.1731
ENSG00000133466	C1QTNF6	114904	Q9BXI9	ENSG00000133466_C1QTNF6	-1.89758	3.42973	-10.8578	1.06916e-14	7.66501e-14	22.926
ENSG00000215845	TSTD1	100131187	NA	ENSG00000215845_TSTD1	-1.11268	4.12303	-10.8574	1.07024e-14	7.66961e-14	22.7788
ENSG00000171246	NPTX1	4884	NA	ENSG00000171246_NPTX1	2.80562	-0.932695	10.8542	1.08162e-14	7.73836e-14	23.2641
ENSG00000118898	PPL	5493	O60437	ENSG00000118898_PPL	-1.41133	7.92142	-10.8534	1.08449e-14	7.75573e-14	22.3839
ENSG00000206503	HLA-A	3105	P16188	ENSG00000206503_HLA-A	-1.25699	7.81581	-10.853	1.08586e-14	7.76231e-14	22.3804
ENSG00000095539	SEMA4G	57715	E5RFG2	ENSG00000095539_SEMA4G	-1.73879	2.43515	-10.849	1.10005e-14	7.85397e-14	23.0461
ENSG00000137875	BCL2L10	10017	Q9HD36	ENSG00000137875_BCL2L10	1.20166	1.06217	10.8387	1.13735e-14	8.10032e-14	23.1521
ENSG00000168135	KCNJ4	3761	P48050	ENSG00000168135_KCNJ4	-4.70898	-2.46497	-10.8376	1.14146e-14	8.11955e-14	23.1333
ENSG00000159263	SIM2	6493	NA	ENSG00000159263_SIM2	-4.90502	-1.62504	-10.8352	1.15032e-14	8.17924e-14	23.1584
ENSG00000262801	U91319.1	NA	NA	ENSG00000262801_U91319.1	-3.0754	-3.50012	-10.8263	1.1839e-14	8.40418e-14	22.9947
ENSG00000165868	HSPA12A	259217	O43301	ENSG00000165868_HSPA12A	1.51345	3.24389	10.8222	1.19977e-14	8.50291e-14	22.847
ENSG00000110628	SLC22A18	5002	Q96BI1	ENSG00000110628_SLC22A18	-1.71628	3.06294	-10.8197	1.20929e-14	8.56336e-14	22.8773
ENSG00000105717	PBX4	80714	NA	ENSG00000105717_PBX4	-1.4854	0.779675	-10.8127	1.23721e-14	8.75748e-14	23.0839
ENSG00000103460	TOX3	27324	O15405	ENSG00000103460_TOX3	-3.71099	-3.87424	-10.8121	1.23975e-14	8.77192e-14	22.9586
ENSG00000166546	BEAN1	146227	Q3B7T3	ENSG00000166546_BEAN1	-3.13046	-0.162221	-10.8088	1.25298e-14	8.85467e-14	23.1218
ENSG00000165188	RNF183	138065	Q96D59	ENSG00000165188_RNF183	-2.64919	0.35775	-10.8086	1.25363e-14	8.85562e-14	23.1124
ENSG00000182261	NLRP10	338322	Q86W26	ENSG00000182261_NLRP10	-2.84904	0.675522	-10.806	1.26423e-14	8.92688e-14	23.0869
ENSG00000128849	CGNL1	84952	NA	ENSG00000128849_CGNL1	-3.71259	0.618662	-10.805	1.2686e-14	8.95413e-14	23.105
ENSG00000257743	MGAM2	93432	Q2M2H8	ENSG00000257743_MGAM2	-8.46057	2.5462	-10.7996	1.29107e-14	9.10898e-14	23.0931
ENSG00000229153	EPHA1-AS1	285965	NA	ENSG00000229153_EPHA1-AS1	2.22937	-1.70105	10.7963	1.30461e-14	9.18956e-14	23.0587
ENSG00000257698	RP11-620J15.3	NA	NA	ENSG00000257698_RP11-620J15.3	1.93863	-0.322056	10.7952	1.30927e-14	9.21862e-14	23.0795
ENSG00000237989	TCONS_00029157	101928399	NA	ENSG00000237989_TCONS_00029157	1.73275	0.979821	10.7929	1.31944e-14	9.27891e-14	23.033
ENSG00000240541	TM4SF1-AS1	100874091	NA	ENSG00000240541_TM4SF1-AS1	-3.32101	-1.94582	-10.7904	1.32991e-14	9.34115e-14	23.027
ENSG00000127954	STEAP4	79689	Q687X5	ENSG00000127954_STEAP4	-4.97431	3.62289	-10.7905	1.32959e-14	9.34115e-14	22.8941
ENSG00000184305	CCSER1	401145	Q9C0I3	ENSG00000184305_CCSER1	-1.63066	1.50256	-10.7797	1.37685e-14	9.66304e-14	22.923
ENSG00000255090	NA	NA	NA	ENSG00000255090_NA	2.30146	-0.520226	10.7764	1.39197e-14	9.76517e-14	23.0194
ENSG00000198626	RYR2	6262	Q92736	ENSG00000198626_RYR2	-4.86448	-1.27081	-10.7739	1.40304e-14	9.83888e-14	22.9831
ENSG00000121753	ADGRB2	576	A2A3C6	ENSG00000121753_ADGRB2	2.19779	-0.823774	10.7674	1.43316e-14	1.0042e-13	22.9863
ENSG00000107159	CA9	768	Q16790	ENSG00000107159_CA9	-3.47527	4.87565	-10.7671	1.43444e-14	1.00469e-13	22.4886
ENSG00000197093	GAL3ST4	79690	Q96RP7	ENSG00000197093_GAL3ST4	1.49474	1.85483	10.7641	1.44862e-14	1.01421e-13	22.8519
ENSG00000044524	EPHA3	2042	P29320	ENSG00000044524_EPHA3	4.00823	-1.60104	10.7638	1.44977e-14	1.0146e-13	22.9448
ENSG00000196872	KIAA1211L	343990	Q6NV74	ENSG00000196872_KIAA1211L	-2.89748	2.31102	-10.7574	1.4804e-14	1.0352e-13	22.8448
ENSG00000144366	GULP1	51454	Q9UBP9	ENSG00000144366_GULP1	-1.37374	3.91279	-10.7548	1.49279e-14	1.04317e-13	22.4231
ENSG00000236882	LINC01554	NA	NA	ENSG00000236882_LINC01554	-4.04624	-2.94136	-10.7548	1.493e-14	1.04317e-13	22.8312
ENSG00000170412	GPRC5C	55890	J3QQN3	ENSG00000170412_GPRC5C	-2.46237	2.98934	-10.7498	1.51758e-14	1.05974e-13	22.6915
ENSG00000229512	AC068580.5	NA	NA	ENSG00000229512_AC068580.5	-2.04249	-1.06567	-10.7461	1.53579e-14	1.07178e-13	22.9227
ENSG00000158856	DMTN	2039	E5RFK6	ENSG00000158856_DMTN	-1.24423	4.46372	-10.7428	1.55227e-14	1.08284e-13	22.3455
ENSG00000270547	LINC01235	401492	NA	ENSG00000270547_LINC01235	-4.92729	1.6374	-10.7387	1.57308e-14	1.09604e-13	22.8838
ENSG00000122694	GLIPR2	152007	Q5VZR0	ENSG00000122694_GLIPR2	-2.02427	1.14903	-10.7361	1.58656e-14	1.10454e-13	22.8299
ENSG00000255364	RP11-94A24.1	NA	NA	ENSG00000255364_RP11-94A24.1	2.95811	-2.78878	10.7358	1.58794e-14	1.10461e-13	22.7881
ENSG00000152380	FAM151B	167555	D6RD51	ENSG00000152380_FAM151B	-1.17337	0.171522	-10.7359	1.58768e-14	1.10461e-13	22.8713
ENSG00000248405	PRR5-ARHGAP8	553158	B1AHC3	ENSG00000248405_PRR5-ARHGAP8	-1.54601	-0.44715	-10.7339	1.59815e-14	1.11127e-13	22.8696
ENSG00000164825	DEFB1	1672	P60022	ENSG00000164825_DEFB1	-5.25532	0.697616	-10.7302	1.61748e-14	1.12426e-13	22.8716
ENSG00000137674	MMP20	9313	O60882	ENSG00000137674_MMP20	-3.5212	-3.6151	-10.7293	1.6221e-14	1.12702e-13	22.7008
ENSG00000139626	ITGB7	3695	P26010	ENSG00000139626_ITGB7	-2.06318	0.82636	-10.7262	1.63868e-14	1.13808e-13	22.7962
ENSG00000163823	CCR1	1230	P32246	ENSG00000163823_CCR1	-3.92471	-2.92483	-10.7178	1.68367e-14	1.16839e-13	22.697
ENSG00000250891	CTD-2281M20.1	NA	NA	ENSG00000250891_CTD-2281M20.1	-2.44378	-4.12858	-10.7088	1.73414e-14	1.20197e-13	22.6129
ENSG00000157873	TNFRSF14	8764	F6UPZ7	ENSG00000157873_TNFRSF14	-1.08378	3.98986	-10.7037	1.763e-14	1.22099e-13	22.2488
ENSG00000204538	PSORS1C2	170680	Q9UIG4	ENSG00000204538_PSORS1C2	-3.42985	-3.26043	-10.7001	1.78368e-14	1.23482e-13	22.622
ENSG00000171608	PIK3CD	5293	O00329	ENSG00000171608_PIK3CD	1.43899	4.32585	10.6982	1.79486e-14	1.24157e-13	22.2303
ENSG00000225431	AP001626.1	101928233	NA	ENSG00000225431_AP001626.1	3.12853	-2.1434	10.6938	1.8209e-14	1.25757e-13	22.6946
ENSG00000155511	GRIA1	2890	P42261	ENSG00000155511_GRIA1	3.43412	-2.84203	10.6865	1.86476e-14	1.28684e-13	22.6089
ENSG00000203805	PLPP4	196051	A0A0A0MSZ0	ENSG00000203805_PLPP4	-3.76802	-1.30659	-10.6859	1.86795e-14	1.28853e-13	22.7267
ENSG00000102287	GABRE	574412	P78334	ENSG00000102287_GABRE	-1.75282	4.94102	-10.6812	1.89692e-14	1.30799e-13	21.9871
ENSG00000181804	SLC9A9	285195	Q8IVB4	ENSG00000181804_SLC9A9	2.17997	1.46761	10.6755	1.93237e-14	1.33085e-13	22.6283
ENSG00000105339	DENND3	22898	E5RJ42	ENSG00000105339_DENND3	-1.27369	3.69882	-10.6746	1.93856e-14	1.33458e-13	22.2443
ENSG00000166578	IQCD	115811	Q96DY2	ENSG00000166578_IQCD	-1.89175	-0.982735	-10.6733	1.9467e-14	1.33912e-13	22.686
ENSG00000105877	DNAH11	8701	Q96DT5	ENSG00000105877_DNAH11	-6.20743	1.6178	-10.6725	1.95167e-14	1.34201e-13	22.6739
ENSG00000185760	KCNQ5	56479	Q9NR82	ENSG00000185760_KCNQ5	1.10341	4.07383	10.667	1.98721e-14	1.3659e-13	22.1551
ENSG00000100170	SLC5A1	6523	P13866	ENSG00000100170_SLC5A1	-6.95526	1.31133	-10.6646	2.00288e-14	1.37612e-13	22.6565
ENSG00000168350	DEGS2	123099	Q6QHC5	ENSG00000168350_DEGS2	-3.66727	-1.10256	-10.6631	2.01228e-14	1.38204e-13	22.6313
ENSG00000181143	MUC16	94025	Q8WXI7	ENSG00000181143_MUC16	-8.32477	1.83925	-10.6622	2.01798e-14	1.3854e-13	22.6535
ENSG00000141485	SLC13A5	284111	Q86YT5	ENSG00000141485_SLC13A5	-2.74209	2.44839	-10.654	2.07287e-14	1.42139e-13	22.4454
ENSG00000229891	LINC01315	102723775	NA	ENSG00000229891_LINC01315	-2.09185	0.311096	-10.6483	2.11208e-14	1.44771e-13	22.5977
ENSG00000186474	KLK12	43849	Q9UKR0	ENSG00000186474_KLK12	-5.15473	-2.61154	-10.6433	2.14675e-14	1.46973e-13	22.4936
ENSG00000137198	GMPR	2766	P36959	ENSG00000137198_GMPR	-2.11808	1.64525	-10.6431	2.14815e-14	1.47011e-13	22.4842
ENSG00000234690	AC073283.4	101927043	NA	ENSG00000234690_AC073283.4	-2.99187	-2.69808	-10.6395	2.1735e-14	1.48628e-13	22.5004
ENSG00000154645	CHODL	140578	Q9H9P2	ENSG00000154645_CHODL	-3.52511	-2.90357	-10.6352	2.20382e-14	1.50642e-13	22.4856
ENSG00000227695	DNMBP-AS1	NA	NA	ENSG00000227695_DNMBP-AS1	-3.13053	-2.4794	-10.6346	2.20833e-14	1.50891e-13	22.4935
ENSG00000112782	CLIC5	53405	Q9NZA1	ENSG00000112782_CLIC5	-4.02336	-3.4765	-10.6283	2.25403e-14	1.53892e-13	22.3962
ENSG00000146013	GFRA3	2676	O60609	ENSG00000146013_GFRA3	-3.18879	-3.24587	-10.6257	2.27334e-14	1.55149e-13	22.4202
ENSG00000170209	ANKK1	255239	Q8NFD2	ENSG00000170209_ANKK1	1.51371	0.733791	10.6212	2.30734e-14	1.57408e-13	22.4821
ENSG00000173926	2020-03-03	115123	Q86UD3	ENSG00000173926_MARCH3	-1.51924	1.4468	-10.6039	2.4418e-14	1.66319e-13	22.3635
ENSG00000176697	BDNF	627	P23560	ENSG00000176697_BDNF	3.00517	-1.10273	10.6031	2.44786e-14	1.66666e-13	22.4518
ENSG00000155966	AFF2	2334	P51816	ENSG00000155966_AFF2	5.27013	-0.314407	10.5826	2.61792e-14	1.78035e-13	22.3945
ENSG00000075673	ATP12A	479	P54707	ENSG00000075673_ATP12A	-5.95189	0.305655	-10.5822	2.62104e-14	1.78177e-13	22.3904
ENSG00000007038	PRSS21	10942	Q9Y6M0	ENSG00000007038_PRSS21	3.91559	0.103774	10.5819	2.62328e-14	1.78259e-13	22.3964
ENSG00000144712	CAND2	23066	O75155	ENSG00000144712_CAND2	3.05402	-1.70226	10.573	2.70065e-14	1.83373e-13	22.3372
ENSG00000086205	FOLH1	219595	NA	ENSG00000086205_FOLH1	-5.05067	-3.01265	-10.5709	2.71966e-14	1.84591e-13	22.26
ENSG00000003436	TFPI	7035	P10646	ENSG00000003436_TFPI	-3.58977	0.0677742	-10.5621	2.79882e-14	1.89741e-13	22.3275
ENSG00000144935	TRPC1	7220	P48995	ENSG00000144935_TRPC1	1.19174	3.25983	10.562	2.80009e-14	1.89753e-13	21.9453
ENSG00000158286	RNF207	388591	NA	ENSG00000158286_RNF207	-1.19735	4.75083	-10.5569	2.8472e-14	1.92795e-13	21.5848
ENSG00000110777	POU2AF1	5450	Q16633	ENSG00000110777_POU2AF1	2.16946	-0.0930253	10.5565	2.85142e-14	1.93006e-13	22.3144
ENSG00000165238	WNK2	65268	A6PVV2	ENSG00000165238_WNK2	-5.9876	0.300006	-10.5509	2.90411e-14	1.96495e-13	22.2949
ENSG00000162444	RBP7	116362	B1AQ60	ENSG00000162444_RBP7	-2.14876	-0.552794	-10.5507	2.90589e-14	1.96539e-13	22.2946
ENSG00000260682	RN7SKP176	NA	NA	ENSG00000260682_RN7SKP176	-3.75027	-1.2757	-10.5483	2.9289e-14	1.97864e-13	22.2781
ENSG00000168004	HRASLS5	117245	H0YGT7	ENSG00000168004_HRASLS5	-2.77102	-3.42077	-10.5448	2.96227e-14	2.0004e-13	22.1517
ENSG00000132563	REEP2	51308	Q9BRK0	ENSG00000132563_REEP2	2.34788	2.10791	10.5441	2.96869e-14	2.00395e-13	22.1222
ENSG00000166105	GLB1L3	112937	Q8NCI6	ENSG00000166105_GLB1L3	4.6329	-0.987149	10.5414	2.99517e-14	2.01868e-13	22.2539
ENSG00000225746	SNHG23	79104	NA	ENSG00000225746_SNHG23	3.50225	-1.77866	10.5412	2.99762e-14	2.01955e-13	22.2448
ENSG00000145358	DDIT4L	115265	Q96D03	ENSG00000145358_DDIT4L	-7.53489	0.253364	-10.5363	3.04628e-14	2.04994e-13	22.231
ENSG00000188959	C9orf152	401546	NA	ENSG00000188959_C9orf152	-4.84964	-2.25946	-10.5302	3.10738e-14	2.08862e-13	22.1618
ENSG00000054219	LY75	4065	O60449	ENSG00000054219_LY75	-1.38954	4.07699	-10.5298	3.112e-14	2.09092e-13	21.748
ENSG00000260947	RP11-384P7.7	NA	NA	ENSG00000260947_RP11-384P7.7	3.8618	-2.59903	10.5265	3.14537e-14	2.11252e-13	22.1501
ENSG00000145632	PLK2	10769	Q9NYY3	ENSG00000145632_PLK2	-1.18894	8.37712	-10.5245	3.16588e-14	2.12465e-13	21.2828
ENSG00000163346	PBXIP1	57326	Q96AQ6	ENSG00000163346_PBXIP1	-1.59479	4.75034	-10.5243	3.16873e-14	2.12574e-13	21.6291
ENSG00000171004	HS6ST2	90161	Q96MM7	ENSG00000171004_HS6ST2	-2.03436	2.58165	-10.5211	3.20112e-14	2.14497e-13	21.9205
ENSG00000077063	CTTNBP2	83992	Q8WZ74	ENSG00000077063_CTTNBP2	4.53902	-0.655475	10.5149	3.26699e-14	2.1864e-13	22.1741
ENSG00000177551	NHLH2	4808	Q02577	ENSG00000177551_NHLH2	3.8128	-2.84991	10.5143	3.27362e-14	2.18848e-13	22.0871
ENSG00000090238	YPEL3	83719	H3BNP5	ENSG00000090238_YPEL3	-1.14604	3.84817	-10.5061	3.36363e-14	2.24691e-13	21.6581
ENSG00000102053	ZC3H12B	340554	NA	ENSG00000102053_ZC3H12B	3.59379	-1.42709	10.5023	3.40546e-14	2.27398e-13	22.1028
ENSG00000165124	SVEP1	79987	Q4LDE5	ENSG00000165124_SVEP1	4.13674	2.91345	10.4952	3.48555e-14	2.32567e-13	21.9584
ENSG00000171119	NRTN	4902	Q99748	ENSG00000171119_NRTN	-3.10299	-3.09403	-10.4925	3.51601e-14	2.34238e-13	22.005
ENSG00000268358	NA	NA	NA	ENSG00000268358_NA	-3.23756	-2.34517	-10.4924	3.51774e-14	2.34264e-13	22.0419
ENSG00000114796	KLHL24	54800	Q6TFL4	ENSG00000114796_KLHL24	-1.5719	3.9421	-10.4841	3.61438e-14	2.40607e-13	21.6039
ENSG00000225298	LINC00113	54088	NA	ENSG00000225298_LINC00113	-3.04635	-3.68931	-10.4811	3.65066e-14	2.42929e-13	21.929
ENSG00000169439	SDC2	6383	P34741	ENSG00000169439_SDC2	2.12682	3.3704	10.4777	3.69124e-14	2.45535e-13	21.7123
ENSG00000154917	RAB6B	51560	Q9NRW1	ENSG00000154917_RAB6B	-2.35835	2.99885	-10.4759	3.71349e-14	2.46636e-13	21.7769
ENSG00000204991	SPIRE2	84501	NA	ENSG00000204991_SPIRE2	-1.36087	1.82243	-10.4636	3.86636e-14	2.56102e-13	21.8291
ENSG00000167578	RAB4B	53916	P61018	ENSG00000167578_RAB4B	-1.32761	2.91901	-10.4607	3.90394e-14	2.58295e-13	21.6185
ENSG00000183018	SPNS2	124976	Q8IVW8	ENSG00000183018_SPNS2	-6.22284	0.540423	-10.4592	3.92323e-14	2.59373e-13	21.9988
ENSG00000169184	MN1	4330	Q10571	ENSG00000169184_MN1	3.12542	2.11835	10.4587	3.93002e-14	2.59723e-13	21.8684
ENSG00000230836	LINC01293	NA	NA	ENSG00000230836_LINC01293	4.31796	-2.02732	10.4522	4.01497e-14	2.64731e-13	21.9366
ENSG00000101194	SLC17A9	63910	Q9BYT1	ENSG00000101194_SLC17A9	3.76809	1.54147	10.4522	4.0144e-14	2.64731e-13	21.9184
ENSG00000152475	ZNF837	116412	Q96EG3	ENSG00000152475_ZNF837	-1.19893	0.764174	-10.4524	4.01215e-14	2.64731e-13	21.9212
ENSG00000259370	RP11-1069G10.1	105370854	NA	ENSG00000259370_RP11-1069G10.1	-3.0163	-1.90322	-10.4522	4.01381e-14	2.64731e-13	21.9602
ENSG00000154240	CEP112	201134	Q8N8E3	ENSG00000154240_CEP112	1.23585	2.36196	10.4498	4.04561e-14	2.66549e-13	21.7491
ENSG00000006756	ARSD	414	P51689	ENSG00000006756_ARSD	-1.53155	4.62294	-10.4469	4.08444e-14	2.69005e-13	21.3802
ENSG00000182179	UBA7	100847079	P41226	ENSG00000182179_UBA7	-1.42156	4.17001	-10.4446	4.11627e-14	2.70895e-13	21.4166
ENSG00000069482	GAL	51083	NA	ENSG00000069482_GAL	-1.54834	3.04001	-10.438	4.20572e-14	2.76467e-13	21.5143
ENSG00000153093	ACOXL	55289	Q9NUZ1	ENSG00000153093_ACOXL	-3.49072	-2.63201	-10.4339	4.26336e-14	2.8015e-13	21.8574
ENSG00000185847	LINC01405	100131138	NA	ENSG00000185847_LINC01405	-3.66121	-3.43543	-10.428	4.34661e-14	2.85512e-13	21.7777
ENSG00000272732	RP5-1159O4.2	NA	NA	ENSG00000272732_RP5-1159O4.2	-2.59825	-3.13605	-10.4274	4.35479e-14	2.85941e-13	21.8234
ENSG00000157404	KIT	3815	P10721	ENSG00000157404_KIT	-8.08064	0.913995	-10.424	4.40512e-14	2.89136e-13	21.8741
ENSG00000163703	CRELD1	78987	Q96HD1	ENSG00000163703_CRELD1	-1.05903	4.15376	-10.4158	4.52495e-14	2.96552e-13	21.3075
ENSG00000267325	LINC01415	NA	NA	ENSG00000267325_LINC01415	2.92984	-2.19998	10.4144	4.54569e-14	2.97686e-13	21.8058
ENSG00000261857	MIA	8190	M0R343	ENSG00000261857_MIA	-2.03486	1.28443	-10.4121	4.58019e-14	2.99832e-13	21.7697
ENSG00000130775	THEMIS2	9473	Q5TEJ8	ENSG00000130775_THEMIS2	-1.8595	2.51743	-10.4103	4.60697e-14	3.01328e-13	21.5793
ENSG00000186567	CEACAM19	56971	A0A087WWX9	ENSG00000186567_CEACAM19	-1.82007	2.01965	-10.3929	4.88022e-14	3.1875e-13	21.5709
ENSG00000101236	RNF24	11237	Q9Y225	ENSG00000101236_RNF24	-1.1692	5.34673	-10.3866	4.98174e-14	3.25014e-13	21.0411
ENSG00000250413	RP11-448G15.1	NA	NA	ENSG00000250413_RP11-448G15.1	-3.57629	-3.74269	-10.3848	5.01156e-14	3.26836e-13	21.6379
ENSG00000130707	ASS1	445	P00966	ENSG00000130707_ASS1	-1.41756	6.56787	-10.3823	5.05342e-14	3.29442e-13	20.9016
ENSG00000156475	PPP2R2B	5521	Q00005	ENSG00000156475_PPP2R2B	4.49749	-1.86245	10.3739	5.19445e-14	3.38381e-13	21.6884
ENSG00000215045	GRID2IP	392862	C9J5F6	ENSG00000215045_GRID2IP	-3.01803	-3.20837	-10.3704	5.25423e-14	3.42018e-13	21.5891
ENSG00000224930	NA	NA	NA	ENSG00000224930_NA	3.5552	1.36723	10.3673	5.30934e-14	3.45346e-13	21.6775
ENSG00000185862	EVI2B	2124	P34910	ENSG00000185862_EVI2B	2.66796	0.549109	10.3595	5.44795e-14	3.53843e-13	21.6591
ENSG00000027869	SH2D2A	9047	Q9NP31	ENSG00000027869_SH2D2A	2.30185	1.68123	10.3595	5.44814e-14	3.53843e-13	21.5558
ENSG00000144821	MYH15	22989	Q9Y2K3	ENSG00000144821_MYH15	1.97688	2.6929	10.3591	5.45471e-14	3.54137e-13	21.4205
ENSG00000163915	IGF2BP2-AS1	646600	NA	ENSG00000163915_IGF2BP2-AS1	2.69363	-3.55953	10.355	5.52909e-14	3.58832e-13	21.5367
ENSG00000169067	ACTBL2	345651	Q562R1	ENSG00000169067_ACTBL2	-3.84409	-0.587826	-10.3539	5.54852e-14	3.59958e-13	21.6605
ENSG00000206073	SERPINB4	6318	P48594	ENSG00000206073_SERPINB4	-4.24842	3.85353	-10.3537	5.55241e-14	3.60075e-13	21.3725
ENSG00000166002	SMCO4	56935	Q9NRQ5	ENSG00000166002_SMCO4	-1.15625	2.16428	-10.3449	5.71576e-14	3.70115e-13	21.412
ENSG00000198732	SMOC1	64093	NA	ENSG00000198732_SMOC1	-1.19636	6.55703	-10.3419	5.77392e-14	3.73601e-13	20.7503
ENSG00000205562	RP11-497E19.1	NA	NA	ENSG00000205562_RP11-497E19.1	3.01037	-0.311024	10.3377	5.85372e-14	3.78341e-13	21.6079
ENSG00000224397	LINC01272	NA	NA	ENSG00000224397_LINC01272	-2.53336	-0.637976	-10.3358	5.89109e-14	3.80614e-13	21.6016
ENSG00000135312	HTR1B	3351	P28222	ENSG00000135312_HTR1B	3.54151	-1.86404	10.3255	6.0945e-14	3.93317e-13	21.537
ENSG00000260833	NA	NA	NA	ENSG00000260833_NA	2.90285	-3.18468	10.3242	6.12089e-14	3.94873e-13	21.4705
ENSG00000137094	DNAJB5	25822	O75953	ENSG00000137094_DNAJB5	1.89504	4.21373	10.3162	6.28507e-14	4.05012e-13	21.0306
ENSG00000151067	CACNA1C	775	F5H0X0	ENSG00000151067_CACNA1C	3.92622	-2.76138	10.3154	6.30158e-14	4.05925e-13	21.4945
ENSG00000196337	CGB7	94027	A0A0F7RQF0	ENSG00000196337_CGB7	1.70967	-1.02686	10.3151	6.30715e-14	4.06133e-13	21.5343
ENSG00000106327	TFR2	7036	H7C544	ENSG00000106327_TFR2	-2.47398	-1.58819	-10.3129	6.35321e-14	4.08947e-13	21.5235
ENSG00000254815	RP11-496I9.1	NA	NA	ENSG00000254815_RP11-496I9.1	-3.17158	-1.38858	-10.3097	6.42063e-14	4.12826e-13	21.516
ENSG00000196569	LAMA2	3908	P24043	ENSG00000196569_LAMA2	1.33013	0.552772	10.3083	6.44977e-14	4.14393e-13	21.4729
ENSG00000198515	CNGA1	1259	P29973	ENSG00000198515_CNGA1	-3.66927	-0.200146	-10.303	6.56429e-14	4.21594e-13	21.4955
ENSG00000124134	KCNS1	3787	Q96KK3	ENSG00000124134_KCNS1	-1.89606	2.41078	-10.3003	6.62394e-14	4.2511e-13	21.2516
ENSG00000183780	SLC35F3	148641	Q8IY50	ENSG00000183780_SLC35F3	1.54693	4.56464	10.2947	6.7477e-14	4.32732e-13	20.8624
ENSG00000261567	NA	NA	NA	ENSG00000261567_NA	2.47741	-2.70271	10.2943	6.75732e-14	4.33189e-13	21.3968
ENSG00000232633	CTD-2201G3.1	NA	NA	ENSG00000232633_CTD-2201G3.1	3.14027	-3.42887	10.2865	6.93273e-14	4.43941e-13	21.3205
ENSG00000236384	LINC00479	150135	NA	ENSG00000236384_LINC00479	-2.65619	-1.18134	-10.2843	6.98271e-14	4.46976e-13	21.4344
ENSG00000166924	NYAP1	222950	Q6ZVC0	ENSG00000166924_NYAP1	2.38091	-0.472306	10.2841	6.98778e-14	4.47135e-13	21.4323
ENSG00000122420	PTGFR	5737	P43088	ENSG00000122420_PTGFR	-5.04149	0.504993	-10.2769	7.15569e-14	4.57204e-13	21.4069
ENSG00000140682	TGFB1I1	7041	H3BSN4	ENSG00000140682_TGFB1I1	1.24248	4.38569	10.2727	7.25649e-14	4.63132e-13	20.7785
ENSG00000105784	RUNDC3B	154661	NA	ENSG00000105784_RUNDC3B	2.52498	-1.64714	10.2683	7.36246e-14	4.69723e-13	21.3635
ENSG00000124507	PACSIN1	29993	Q9BY11	ENSG00000124507_PACSIN1	-2.84	-2.16639	-10.2651	7.4421e-14	4.74629e-13	21.3341
ENSG00000172817	CYP7B1	9420	NA	ENSG00000172817_CYP7B1	-1.8487	1.42874	-10.264	7.4685e-14	4.75787e-13	21.2509
ENSG00000106125	FAM188B	84182	Q4G0A6	ENSG00000106125_FAM188B	-1.79267	-0.0693935	-10.2626	7.50424e-14	4.77713e-13	21.3338
ENSG00000256043	CTSO	1519	P43234	ENSG00000256043_CTSO	-1.68411	2.75322	-10.2614	7.53387e-14	4.79423e-13	21.0797
ENSG00000261888	AC144831.1	NA	NA	ENSG00000261888_AC144831.1	-3.24972	-3.46649	-10.26	7.5679e-14	4.81412e-13	21.2461
ENSG00000163995	ABLIM2	84448	NA	ENSG00000163995_ABLIM2	-2.96713	-1.15214	-10.2573	7.63725e-14	4.85467e-13	21.3436
ENSG00000064651	SLC12A2	6558	P55011	ENSG00000064651_SLC12A2	-1.22557	6.8962	-10.2565	7.65668e-14	4.86345e-13	20.4456
ENSG00000069424	KCNAB2	8514	Q5TG84	ENSG00000069424_KCNAB2	1.67881	1.7132	10.2524	7.76215e-14	4.92683e-13	21.1922
ENSG00000144857	BOC	91653	C9J2L7	ENSG00000144857_BOC	1.88427	3.13006	10.2508	7.80245e-14	4.9506e-13	20.9645
ENSG00000176659	C20orf197	NA	NA	ENSG00000176659_C20orf197	3.76039	-2.05195	10.2342	8.24348e-14	5.21325e-13	21.2347
ENSG00000186226	LCE1E	353135	Q5T753	ENSG00000186226_LCE1E	2.48145	-3.82327	10.2317	8.31198e-14	5.25273e-13	21.122
ENSG00000164920	OSR2	116039	NA	ENSG00000164920_OSR2	-2.65186	1.6207	-10.231	8.33073e-14	5.26267e-13	21.1322
ENSG00000272143	FGF14-AS2	283481	NA	ENSG00000272143_FGF14-AS2	2.25778	-1.04981	10.2281	8.41113e-14	5.30958e-13	21.25
ENSG00000164574	GALNT10	55568	Q86SR1	ENSG00000164574_GALNT10	1.66847	5.22985	10.2273	8.4351e-14	5.32277e-13	20.5176
ENSG00000160447	PKN3	29941	Q6P5Z2	ENSG00000160447_PKN3	-1.41687	3.6765	-10.2156	8.76677e-14	5.516e-13	20.7089
ENSG00000124116	WFDC3	140686	NA	ENSG00000124116_WFDC3	-3.68806	-0.697111	-10.2107	8.91065e-14	5.59434e-13	21.1954
ENSG00000237515	SHISA9	729993	B4DS77	ENSG00000237515_SHISA9	-4.71578	1.91311	-10.2108	8.90755e-14	5.59434e-13	21.1407
ENSG00000229848	RP13-766D20.2	NA	NA	ENSG00000229848_RP13-766D20.2	-2.84657	-3.37978	-10.2032	9.13608e-14	5.72964e-13	21.0792
ENSG00000258399	MEG8	NA	NA	ENSG00000258399_MEG8	3.05107	-2.43086	10.1932	9.44423e-14	5.92075e-13	21.1095
ENSG00000115290	GRB14	2888	NA	ENSG00000115290_GRB14	1.12855	3.74509	10.1882	9.60225e-14	6.00895e-13	20.6031
ENSG00000152763	WDR78	79819	Q5VTH9	ENSG00000152763_WDR78	-1.18234	1.11181	-10.1877	9.61996e-14	6.01568e-13	21.0174
ENSG00000128594	LRRC4	64101	Q9HBW1	ENSG00000128594_LRRC4	-1.42235	2.39846	-10.1877	9.61785e-14	6.01568e-13	20.8851
ENSG00000100505	TRIM9	114088	Q9C026	ENSG00000100505_TRIM9	2.57623	-0.29608	10.1829	9.77354e-14	6.10512e-13	21.101
ENSG00000159164	SV2A	9900	Q7L0J3	ENSG00000159164_SV2A	2.94906	-0.783609	10.1819	9.80475e-14	6.1224e-13	21.1016
ENSG00000152926	ZNF117	51351	Q03924	ENSG00000152926_ZNF117	-1.78276	2.87413	-10.181	9.8337e-14	6.13827e-13	20.7115
ENSG00000124466	LYPD3	27076	O95274	ENSG00000124466_LYPD3	-1.47424	5.75279	-10.1784	9.92065e-14	6.19032e-13	20.3123
ENSG00000155918	RAET1L	154064	Q5VY80	ENSG00000155918_RAET1L	-2.93185	0.255487	-10.1728	1.01062e-13	6.2993e-13	21.06
ENSG00000066468	FGFR2	2263	P21802	ENSG00000066468_FGFR2	1.27445	5.45343	10.1718	1.01417e-13	6.31912e-13	20.3104
ENSG00000082175	PGR	5241	P06401	ENSG00000082175_PGR	5.46561	-2.1928	10.1705	1.01855e-13	6.34416e-13	21.0344
ENSG00000159921	GNE	10020	Q9Y223	ENSG00000159921_GNE	-1.31501	5.93368	-10.1689	1.02369e-13	6.37388e-13	20.2307
ENSG00000142173	COL6A2	1292	P12110	ENSG00000142173_COL6A2	-3.76978	4.84527	-10.1617	1.04863e-13	6.5245e-13	20.479
ENSG00000050344	NFE2L3	9603	Q9Y4A8	ENSG00000050344_NFE2L3	-1.36992	4.36699	-10.1615	1.04931e-13	6.52635e-13	20.4393
ENSG00000152213	ARL11	115761	Q969Q4	ENSG00000152213_ARL11	-2.56623	-0.684394	-10.1597	1.05549e-13	6.56246e-13	21.0285
ENSG00000267702	RP11-53B2.2	NA	NA	ENSG00000267702_RP11-53B2.2	-2.69946	-3.77636	-10.1566	1.06643e-13	6.62573e-13	20.8919
ENSG00000214900	LINC01588	283551	NA	ENSG00000214900_LINC01588	-1.6859	0.419089	-10.1505	1.0885e-13	6.75797e-13	20.9561
ENSG00000198846	TOX	9760	O94900	ENSG00000198846_TOX	3.60884	-2.27665	10.1429	1.11618e-13	6.9249e-13	20.9444
ENSG00000129295	LRRC6	23639	Q86X45	ENSG00000129295_LRRC6	-2.26778	-0.659449	-10.1421	1.11929e-13	6.9417e-13	20.9715
ENSG00000182600	C2orf82	389084	C9K0N5	ENSG00000182600_C2orf82	-1.88746	0.635198	-10.1405	1.12512e-13	6.97537e-13	20.9075
ENSG00000261971	MMP25-AS1	NA	NA	ENSG00000261971_MMP25-AS1	-1.3137	1.57671	-10.1376	1.13599e-13	7.04022e-13	20.7069
ENSG00000269927	RP6-91H8.3	NA	NA	ENSG00000269927_RP6-91H8.3	3.12809	-2.1342	10.137	1.13819e-13	7.05135e-13	20.9533
ENSG00000180155	LYNX1	66004	G3V0Z9	ENSG00000180155_LYNX1	-2.3388	2.68215	-10.1363	1.14092e-13	7.06568e-13	20.7291
[truncated: 2,041 more rows]

## Sheet: B DE MEP vs LEP in Old
EnsemblID	EnsDb.Hsapiens.v86.GeneSYM	EnsDb.Hsapiens.v86.EntrezID	EnsDb.Hsapiens.v86.UniprotID	EnsemblID.GeneSYM	logFC	AveExpr	t	P.Value	adj.P.Val	B
ENSG00000143479	DYRK3	8444	O43781	ENSG00000143479_DYRK3	2.69239	3.96393	34.3796	3.265e-36	5.6576e-32	72.086
ENSG00000163694	RBM47	54502	A0AV96	ENSG00000163694_RBM47	-3.56979	4.82492	-31.0408	4.11676e-34	3.56676e-30	67.5534
ENSG00000151726	ACSL1	2180	B7Z3Z9	ENSG00000151726_ACSL1	-3.11952	7.39809	-30.4054	1.09004e-33	6.29608e-30	66.7129
ENSG00000105928	DFNA5	1687	O60443	ENSG00000105928_DFNA5	3.62319	5.09861	29.7371	3.09696e-33	1.23102e-29	65.5983
ENSG00000065361	ERBB3	2065	F8VRL0	ENSG00000065361_ERBB3	-3.91585	4.90012	-29.6503	3.55212e-33	1.23102e-29	65.3895
ENSG00000125089	SH3TC1	54436	NA	ENSG00000125089_SH3TC1	3.11026	4.61999	29.1001	8.54634e-33	2.46818e-29	64.5944
ENSG00000119411	BSPRY	54836	Q5W0U4	ENSG00000119411_BSPRY	-6.26127	2.44762	-27.9703	5.43508e-32	1.34542e-28	61.0958
ENSG00000171124	FUT3	2525	P21217	ENSG00000171124_FUT3	-6.07896	2.73401	-27.8031	7.1858e-32	1.55644e-28	61.208
ENSG00000173898	SPTBN2	6712	O15020	ENSG00000173898_SPTBN2	-1.69414	7.06681	-27.71	8.40165e-32	1.6176e-28	62.3537
ENSG00000153292	ADGRF1	266977	Q5T601	ENSG00000153292_ADGRF1	-3.63861	6.48551	-27.6403	9.44565e-32	1.63674e-28	62.2641
ENSG00000073350	LLGL2	3993	J3QSA6	ENSG00000073350_LLGL2	-2.40857	5.51358	-26.9366	3.13188e-31	4.93357e-28	61.07
ENSG00000100092	SH3BP1	23616	Q9Y3L3	ENSG00000100092_SH3BP1	1.65929	6.11436	26.8111	3.88934e-31	5.21468e-28	60.8318
ENSG00000109062	SLC9A3R1	100500847	J3QRP6	ENSG00000109062_SLC9A3R1	-2.07295	6.59969	-26.8077	3.91222e-31	5.21468e-28	60.8251
ENSG00000185499	MUC1	4582	A0A0C4DGW3	ENSG00000185499_MUC1	-6.28269	5.54255	-26.6783	4.89572e-31	6.0595e-28	60.5517
ENSG00000071073	MGAT4A	11320	Q9UM21	ENSG00000071073_MGAT4A	-4.95269	2.77234	-26.0586	1.45278e-30	1.67825e-27	58.7363
ENSG00000065054	SLC9A3R2	9351	H3BMF5	ENSG00000065054_SLC9A3R2	-2.43644	5.18031	-25.9673	1.70827e-30	1.85005e-27	59.3768
ENSG00000230937	MIR205HG	406988	NA	ENSG00000230937_MIR205HG	2.6774	6.85815	25.8299	2.18237e-30	2.22448e-27	59.0898
ENSG00000157350	ST3GAL2	6483	Q16842	ENSG00000157350_ST3GAL2	3.01508	3.11557	25.6806	2.85137e-30	2.74492e-27	58.5321
ENSG00000137802	MAPKBP1	23005	D6RHX7	ENSG00000137802_MAPKBP1	1.4873	6.05929	24.8316	1.33901e-29	1.16012e-26	57.2807
ENSG00000171867	PRNP	5621	P04156	ENSG00000171867_PRNP	2.54362	8.82898	24.7205	1.64482e-29	1.35721e-26	57.0242
ENSG00000143375	CGN	57530	A2A3M4	ENSG00000143375_CGN	-5.44376	3.71375	-24.6412	1.90588e-29	1.50114e-26	56.5438
ENSG00000019549	SNAI2	6591	O43623	ENSG00000019549_SNAI2	3.85441	5.7842	24.5986	2.06324e-29	1.55443e-26	56.8902
ENSG00000155755	TMEM237	65062	Q96Q45	ENSG00000155755_TMEM237	1.48012	5.5019	24.5305	2.34253e-29	1.69131e-26	56.7422
ENSG00000163435	ELF3	1999	P78545	ENSG00000163435_ELF3	-6.10239	4.93119	-24.4089	2.94117e-29	2.03859e-26	56.4059
ENSG00000134369	NAV1	89796	A0A0A0MRJ3	ENSG00000134369_NAV1	2.3269	8.00307	24.3579	3.2367e-29	2.07725e-26	56.3505
ENSG00000144815	NXPE3	91775	NA	ENSG00000144815_NXPE3	1.9051	5.31852	24.3635	3.20289e-29	2.07725e-26	56.4442
ENSG00000183762	KREMEN1	83999	Q96MU8	ENSG00000183762_KREMEN1	3.19807	4.87238	24.1767	4.55426e-29	2.81843e-26	56.1037
ENSG00000178184	PARD6G	84552	Q9BYG4	ENSG00000178184_PARD6G	3.8262	4.09547	24.0854	5.41369e-29	3.12695e-26	55.8672
ENSG00000163975	MELTF	4241	NA	ENSG00000163975_MELTF	-3.65488	6.39353	-24.0655	5.62189e-29	3.14246e-26	55.8686
ENSG00000184349	EFNA5	1946	P52803	ENSG00000184349_EFNA5	-1.85681	6.1127	-23.8639	8.2547e-29	4.46992e-26	55.4651
ENSG00000109738	GLRB	2743	P48167	ENSG00000109738_GLRB	-2.4394	3.25038	-23.6628	1.21403e-28	6.37477e-26	54.9935
ENSG00000185614	FAM212A	389119	Q96EL1	ENSG00000185614_FAM212A	2.95089	2.09724	23.6013	1.36699e-28	6.62595e-26	54.5824
ENSG00000164086	DUSP7	1849	Q16829	ENSG00000164086_DUSP7	1.95999	7.20242	23.5976	1.37658e-28	6.62595e-26	54.9051
ENSG00000134317	GRHL1	29841	F8WFB0	ENSG00000134317_GRHL1	-3.36296	5.5233	-23.6009	1.36797e-28	6.62595e-26	55.004
ENSG00000181885	CLDN7	1366	O95471	ENSG00000181885_CLDN7	-4.31231	5.65141	-23.542	1.53262e-28	6.98875e-26	54.8957
ENSG00000118849	RARRES1	5918	P49788	ENSG00000118849_RARRES1	-7.1132	6.58571	-23.5478	1.51555e-28	6.98875e-26	54.9074
ENSG00000166971	AKTIP	64400	Q9H8T0	ENSG00000166971_AKTIP	-1.43173	3.70723	-23.4542	1.81675e-28	8.07194e-26	54.7042
ENSG00000267795	SMIM22	440335	K7EJ46	ENSG00000267795_SMIM22	-6.23465	0.704139	-23.365	2.16065e-28	9.35994e-26	52.4661
ENSG00000134874	DZIP1	22873	Q86YF9	ENSG00000134874_DZIP1	3.29702	4.50563	23.2939	2.48185e-28	1.01482e-25	54.3931
ENSG00000149948	HMGA2	8091	P52926	ENSG00000149948_HMGA2	3.20446	5.58142	23.2772	2.56396e-28	1.01482e-25	54.3594
ENSG00000138821	SLC39A8	64116	Q9C0K1	ENSG00000138821_SLC39A8	-2.22975	7.09547	-23.2821	2.53947e-28	1.01482e-25	54.2974
ENSG00000161921	CXCL16	58191	Q9H2A7	ENSG00000161921_CXCL16	-3.13159	5.61041	-23.2746	2.57688e-28	1.01482e-25	54.3676
ENSG00000119888	EPCAM	4072	B5MCA4	ENSG00000119888_EPCAM	-2.29613	7.16916	-23.169	3.1683e-28	1.22001e-25	54.0769
ENSG00000121690	DEPDC7	91614	Q96QD5	ENSG00000121690_DEPDC7	3.1962	2.04458	23.102	3.61341e-28	1.36116e-25	53.5748
ENSG00000188313	PLSCR1	5359	O15162	ENSG00000188313_PLSCR1	-1.76745	6.43183	-23.0359	4.11487e-28	1.48547e-25	53.8362
ENSG00000141934	PLPP2	8612	O43688	ENSG00000141934_PLPP2	-2.9183	5.07483	-23.045	4.04145e-28	1.48547e-25	53.9301
ENSG00000185187	SIGIRR	59307	H0YDR5	ENSG00000185187_SIGIRR	-3.07299	2.86214	-23.0199	4.24687e-28	1.50183e-25	53.6429
ENSG00000188505	NCCRP1	342897	Q6ZVX7	ENSG00000188505_NCCRP1	-6.91624	3.60713	-23.0027	4.3929e-28	1.5224e-25	53.3385
ENSG00000107130	NCS1	23413	P62166	ENSG00000107130_NCS1	1.28939	6.81279	22.8777	5.62334e-28	1.91061e-25	53.499
ENSG00000086570	FAT2	2196	H0YBK2	ENSG00000086570_FAT2	2.48953	7.94025	22.6586	8.69327e-28	2.84221e-25	53.0368
ENSG00000167306	MYO5B	4645	Q9ULV0	ENSG00000167306_MYO5B	-3.15915	6.59741	-22.6669	8.55176e-28	2.84221e-25	53.1139
ENSG00000087266	SH3BP2	6452	P78314	ENSG00000087266_SH3BP2	-2.84492	5.78484	-22.5841	1.00899e-27	3.23774e-25	52.9847
ENSG00000171488	LRRC8C	84230	Q8TDW0	ENSG00000171488_LRRC8C	2.87755	5.11982	22.4556	1.3059e-27	4.04082e-25	52.751
ENSG00000171345	KRT19	3880	P08727	ENSG00000171345_KRT19	-5.80135	8.1877	-22.4562	1.30432e-27	4.04082e-25	52.6827
ENSG00000114270	COL7A1	100313843	NA	ENSG00000114270_COL7A1	3.51935	7.52542	22.3716	1.54648e-27	4.70129e-25	52.4756
ENSG00000100364	KIAA0930	23313	Q6ICG6	ENSG00000100364_KIAA0930	1.50182	7.44895	22.3612	1.57938e-27	4.71855e-25	52.4392
ENSG00000110400	NECTIN1	5818	NA	ENSG00000110400_NECTIN1	2.16541	8.09995	22.312	1.74428e-27	5.12285e-25	52.3272
ENSG00000116141	MARK1	4139	Q9P0L2	ENSG00000116141_MARK1	4.47611	2.57406	22.2671	1.91038e-27	5.51718e-25	51.9571
ENSG00000176092	AIM1L	55057	E9PIR9	ENSG00000176092_AIM1L	-2.94241	4.46881	-22.1847	2.25757e-27	6.41297e-25	52.2164
ENSG00000257093	KIAA1147	57189	A4D1U4	ENSG00000257093_KIAA1147	-1.3952	6.32295	-22.1748	2.30358e-27	6.43813e-25	52.1027
ENSG00000136114	THSD1	55901	Q9NS62	ENSG00000136114_THSD1	2.88974	3.58093	22.142	2.4624e-27	6.77278e-25	52.0993
ENSG00000168785	TSPAN5	10098	D6RAR1	ENSG00000168785_TSPAN5	3.58782	4.36108	22.1173	2.5894e-27	7.0108e-25	52.0518
ENSG00000015475	BID	637	P55957	ENSG00000015475_BID	-1.99857	5.5686	-22.1071	2.64404e-27	7.02915e-25	52.0171
ENSG00000178467	P4HTM	54681	Q9NXG6	ENSG00000178467_P4HTM	-2.67755	3.60788	-22.1009	2.67731e-27	7.02915e-25	51.9918
ENSG00000167106	FAM102A	399665	Q5T9C2	ENSG00000167106_FAM102A	-2.06653	5.40245	-22.0709	2.84613e-27	7.36086e-25	51.9498
ENSG00000164626	KCNK5	8645	O95279	ENSG00000164626_KCNK5	-5.34583	3.4735	-21.9908	3.3526e-27	8.54321e-25	51.5675
ENSG00000050405	LIMA1	51474	F8VS07	ENSG00000050405_LIMA1	1.73627	8.6928	21.9643	3.53947e-27	8.88869e-25	51.6052
ENSG00000157657	ZNF618	114991	Q5T7W0	ENSG00000157657_ZNF618	3.14253	4.98632	21.8806	4.20205e-27	1.04019e-24	51.5952
ENSG00000164116	GUCY1A3	2982	Q02108	ENSG00000164116_GUCY1A3	-5.60777	5.03527	-21.8314	4.64923e-27	1.13467e-24	51.4618
ENSG00000157168	NRG1	3084	E7EX30	ENSG00000157168_NRG1	4.47043	5.15166	21.8001	4.95924e-27	1.18793e-24	51.4323
ENSG00000197147	LRRC8B	23507	C9JGJ7	ENSG00000197147_LRRC8B	-1.93194	4.95823	-21.7957	5.00456e-27	1.18793e-24	51.4031
ENSG00000175793	SFN	2810	P31947	ENSG00000175793_SFN	1.73014	9.95742	21.6387	6.92302e-27	1.62111e-24	50.9211
ENSG00000197461	PDGFA	5154	P04085	ENSG00000197461_PDGFA	1.92913	4.93344	21.5482	8.35419e-27	1.93015e-24	50.8974
ENSG00000078967	UBE2D4	51619	F2Z3J6	ENSG00000078967_UBE2D4	-1.2443	3.79723	-21.5347	8.59172e-27	1.95891e-24	50.8846
ENSG00000129353	SLC44A2	57153	K7ESF5	ENSG00000129353_SLC44A2	-2.41873	7.40829	-21.5122	9.00393e-27	2.02624e-24	50.698
ENSG00000023892	DEF6	50619	Q9H4E7	ENSG00000023892_DEF6	1.57626	4.20578	21.4672	9.88933e-27	2.19695e-24	50.7408
ENSG00000146674	IGFBP3	3486	B3KWK7	ENSG00000146674_IGFBP3	-6.89687	6.12903	-21.3736	1.20272e-26	2.63806e-24	50.5474
ENSG00000165905	LARGE2	120071	E9PIZ2	ENSG00000165905_LARGE2	3.47014	4.58601	21.3369	1.29888e-26	2.81338e-24	50.4718
ENSG00000023445	BIRC3	330	NA	ENSG00000023445_BIRC3	-4.25097	5.4752	-21.2508	1.55623e-26	3.32918e-24	50.289
ENSG00000073282	TP63	8626	NA	ENSG00000073282_TP63	4.21386	6.66646	21.2381	1.59849e-26	3.37787e-24	50.1725
ENSG00000138771	SHROOM3	57619	Q8TF72	ENSG00000138771_SHROOM3	-1.34904	7.38161	-21.231	1.62268e-26	3.38768e-24	50.0913
ENSG00000197565	COL4A6	1288	Q14031	ENSG00000197565_COL4A6	2.95341	5.37692	21.2175	1.66941e-26	3.44376e-24	50.1737
ENSG00000026025	VIM	7431	NA	ENSG00000026025_VIM	3.3083	9.2701	21.121	2.04619e-26	4.17133e-24	49.8372
ENSG00000206069	TMEM211	255349	A0A0C4DG04	ENSG00000206069_TMEM211	-4.92662	-2.4942	-21.1131	2.08083e-26	4.19262e-24	46.9957
ENSG00000158528	PPP1R9A	55607	C9J730	ENSG00000158528_PPP1R9A	-6.41262	1.52181	-21.1045	2.11884e-26	4.22015e-24	48.6609
ENSG00000205060	SLC35B4	84912	Q969S0	ENSG00000205060_SLC35B4	1.18511	5.55249	21.053	2.36306e-26	4.65307e-24	49.7875
ENSG00000214022	REPIN1	29803	E7EVL6	ENSG00000214022_REPIN1	-2.05299	5.33822	-20.9927	2.6858e-26	5.22916e-24	49.6904
ENSG00000163565	IFI16	3428	H3BVE6	ENSG00000163565_IFI16	1.55034	7.23264	20.898	3.2857e-26	6.32606e-24	49.3805
ENSG00000143653	SCCPDH	51097	Q8NBX0	ENSG00000143653_SCCPDH	-2.07935	4.76215	-20.8881	3.35563e-26	6.38343e-24	49.5213
ENSG00000141655	TNFRSF11A	8792	NA	ENSG00000141655_TNFRSF11A	-2.56844	3.76601	-20.8834	3.38917e-26	6.38343e-24	49.5165
ENSG00000155066	PROM2	150696	Q8N271	ENSG00000155066_PROM2	-2.13328	7.80033	-20.7921	4.11958e-26	7.67571e-24	49.1418
ENSG00000151914	DST	667	Q03001	ENSG00000151914_DST	1.99472	9.76513	20.7364	4.64181e-26	8.55673e-24	48.9999
ENSG00000130590	SAMD10	140700	Q9BYL1	ENSG00000130590_SAMD10	-2.28	2.56799	-20.7225	4.78304e-26	8.72426e-24	49.0694
ENSG00000134569	LRP4	4038	O75096	ENSG00000134569_LRP4	4.61501	2.48922	20.5501	6.93231e-26	1.25128e-23	48.4863
ENSG00000090776	EFNB1	1947	P98172	ENSG00000090776_EFNB1	2.08023	7.0595	20.5406	7.07691e-26	1.26421e-23	48.6155
ENSG00000145934	TENM2	57451	Q9NT68	ENSG00000145934_TENM2	5.03289	6.11595	20.5352	7.15937e-26	1.26589e-23	48.7407
ENSG00000094755	GABRP	2568	E5RG98	ENSG00000094755_GABRP	-7.14484	6.97563	-20.5229	7.35261e-26	1.28693e-23	48.7285
ENSG00000073969	NSF	4905	K7EQD6	ENSG00000073969_NSF	-1.09365	5.7077	-20.507	7.61047e-26	1.31874e-23	48.6084
ENSG00000204764	RANBP17	64901	NA	ENSG00000204764_RANBP17	-3.87096	2.30793	-20.4995	7.7354e-26	1.32712e-23	48.1868
ENSG00000165152	TMEM246	84302	Q9BRR3	ENSG00000165152_TMEM246	3.58989	3.14588	20.4789	8.08867e-26	1.37412e-23	48.6173
ENSG00000127955	GNAI1	2770	C9J2Z2	ENSG00000127955_GNAI1	1.70877	5.21044	20.415	9.29063e-26	1.56299e-23	48.4502
ENSG00000186350	RXRA	6256	NA	ENSG00000186350_RXRA	1.28764	6.31455	20.3177	1.14822e-25	1.91311e-23	48.1488
ENSG00000075618	FSCN1	6624	Q16658	ENSG00000075618_FSCN1	1.56747	9.14899	20.2827	1.23936e-25	2.026e-23	48.0096
ENSG00000126016	AMOT	100423009	Q4VCS5	ENSG00000126016_AMOT	-6.48655	2.27977	-20.2833	1.23767e-25	2.026e-23	47.4138
ENSG00000163629	PTPN13	5783	Q12923	ENSG00000163629_PTPN13	3.68248	6.71451	20.2648	1.28865e-25	2.0869e-23	48.0726
ENSG00000196781	TLE1	7088	Q04724	ENSG00000196781_TLE1	-1.09768	5.36977	-20.1993	1.48743e-25	2.38651e-23	47.9552
ENSG00000033327	GAB2	9846	Q9UQC2	ENSG00000033327_GAB2	-4.25488	2.60952	-20.1485	1.66256e-25	2.64301e-23	47.6779
ENSG00000123892	RAB38	23682	P57729	ENSG00000123892_RAB38	3.0314	5.3225	20.1113	1.80427e-25	2.84221e-23	47.8085
ENSG00000167323	STIM1	100616453	E9PRZ7	ENSG00000167323_STIM1	-1.18687	7.12793	-20.0911	1.88616e-25	2.91816e-23	47.623
ENSG00000179178	TMEM125	128218	Q96AQ2	ENSG00000179178_TMEM125	-3.93597	2.37842	-20.0912	1.88575e-25	2.91816e-23	47.5084
ENSG00000050165	DKK3	27122	NA	ENSG00000050165_DKK3	4.27449	6.16959	20.0481	2.07341e-25	3.17947e-23	47.6597
ENSG00000095739	BAMBI	25805	Q13145	ENSG00000095739_BAMBI	-2.7565	3.07752	-20.0364	2.12729e-25	3.23348e-23	47.6315
ENSG00000175183	CSRP2	1466	Q16527	ENSG00000175183_CSRP2	2.19108	3.71821	20.0299	2.15799e-25	3.25162e-23	47.6764
ENSG00000196812	ZSCAN16	80345	Q9H4T2	ENSG00000196812_ZSCAN16	-2.32372	1.6381	-20.0227	2.19295e-25	3.27581e-23	47.3338
ENSG00000111344	RASAL1	8437	O95294	ENSG00000111344_RASAL1	-6.60344	3.13933	-19.9963	2.32431e-25	3.44236e-23	47.1805
ENSG00000130940	CASZ1	54897	Q86V15	ENSG00000130940_CASZ1	-1.68404	5.84801	-19.9757	2.4323e-25	3.57177e-23	47.4368
ENSG00000117984	CTSD	1509	P07339	ENSG00000117984_CTSD	-2.36144	9.61584	-19.9699	2.46388e-25	3.58774e-23	47.3168
ENSG00000235750	KIAA0040	9674	J3QR46	ENSG00000235750_KIAA0040	1.18116	6.72975	19.9084	2.82304e-25	4.07647e-23	47.2263
ENSG00000138829	FBN2	2201	P35556	ENSG00000138829_FBN2	4.48758	6.25622	19.8983	2.88676e-25	4.10014e-23	47.2995
ENSG00000122591	FAM126A	84668	NA	ENSG00000122591_FAM126A	1.4528	6.43441	19.9001	2.87538e-25	4.10014e-23	47.2199
ENSG00000158106	RHPN1	114822	Q8TCX5	ENSG00000158106_RHPN1	-3.71321	3.23303	-19.8791	3.01264e-25	4.24415e-23	47.2785
ENSG00000145246	ATP10D	57205	Q9P241	ENSG00000145246_ATP10D	1.4223	6.63694	19.8451	3.24876e-25	4.53988e-23	47.0923
ENSG00000166130	IKBIP	121457	Q70UQ0	ENSG00000166130_IKBIP	1.9964	5.25278	19.8268	3.38395e-25	4.69097e-23	47.152
ENSG00000198121	LPAR1	1902	Q92633	ENSG00000198121_LPAR1	4.50283	3.08587	19.8005	3.58741e-25	4.93355e-23	47.0504
ENSG00000196547	MAN2A2	4122	H0YMU0	ENSG00000196547_MAN2A2	-1.53756	5.79238	-19.7758	3.7905e-25	5.13605e-23	46.9885
ENSG00000182580	EPHB3	2049	P54753	ENSG00000182580_EPHB3	-2.31974	5.46206	-19.7754	3.79394e-25	5.13605e-23	47.0398
ENSG00000109667	SLC2A9	56606	NA	ENSG00000109667_SLC2A9	3.1956	4.61893	19.7666	3.86857e-25	5.15651e-23	47.0857
ENSG00000226742	HSBP1L1	440498	C9JCN9	ENSG00000226742_HSBP1L1	-1.27373	4.98685	-19.7086	4.40281e-25	5.77969e-23	46.8917
ENSG00000106078	COBL	23242	J3KR05	ENSG00000106078_COBL	-5.28451	3.84214	-19.71	4.38927e-25	5.77969e-23	46.8709
ENSG00000110057	UNC93B1	81622	NA	ENSG00000110057_UNC93B1	-1.74169	4.66193	-19.6961	4.52759e-25	5.89881e-23	46.903
ENSG00000131089	ARHGEF9	23229	O43307	ENSG00000131089_ARHGEF9	-1.3316	5.30179	-19.6679	4.82245e-25	6.23607e-23	46.7864
ENSG00000159314	ARHGAP27	201176	E9PNT2	ENSG00000159314_ARHGAP27	-1.29135	5.58678	-19.6458	5.06668e-25	6.50337e-23	46.7076
ENSG00000184731	FAM110C	642273	Q1W6H9	ENSG00000184731_FAM110C	2.08423	5.83639	19.6343	5.19873e-25	6.62379e-23	46.6691
ENSG00000003147	ICA1	3382	Q05084	ENSG00000003147_ICA1	-3.87914	3.28123	-19.6304	5.24454e-25	6.63339e-23	46.6992
ENSG00000089060	SLC8B1	80024	Q6J4K2	ENSG00000089060_SLC8B1	-1.34407	4.59391	-19.6198	5.37026e-25	6.74317e-23	46.7285
ENSG00000111846	GCNT2	2651	B7ZBL3	ENSG00000111846_GCNT2	-6.64882	2.29624	-19.5324	6.53529e-25	8.14701e-23	45.7605
ENSG00000123352	SPATS2	65244	F8VXB3	ENSG00000123352_SPATS2	1.29655	5.67073	19.4794	7.36333e-25	9.1137e-23	46.324
ENSG00000084207	GSTP1	2950	P09211	ENSG00000084207_GSTP1	1.42213	9.24173	19.4727	7.47513e-25	9.18646e-23	46.1926
ENSG00000106799	TGFBR1	7046	F8VVC4	ENSG00000106799_TGFBR1	1.28861	6.08521	19.4585	7.71841e-25	9.41864e-23	46.2417
ENSG00000169515	CCDC8	83987	Q9H0W5	ENSG00000169515_CCDC8	3.20841	5.34895	19.4397	8.05313e-25	9.69061e-23	46.3047
ENSG00000170421	KRT8	3856	P05787	ENSG00000170421_KRT8	-4.62493	8.26046	-19.4416	8.01886e-25	9.69061e-23	46.1704
ENSG00000198125	MB	4151	Q8WVH6	ENSG00000198125_MB	-6.65453	-1.78466	-19.4361	8.11804e-25	9.70133e-23	44.0767
ENSG00000101000	PROCR	10544	Q9UNN8	ENSG00000101000_PROCR	2.58163	4.84451	19.415	8.51489e-25	1.01059e-22	46.2572
ENSG00000092929	UNC13D	201294	K7EN29	ENSG00000092929_UNC13D	-2.94755	4.70745	-19.3777	9.26502e-25	1.09214e-22	46.2106
ENSG00000177570	SAMD12	401474	H0Y632	ENSG00000177570_SAMD12	-3.3545	4.14368	-19.3381	1.01334e-24	1.18643e-22	46.1375
ENSG00000149527	PLCH2	9651	V9GY64	ENSG00000149527_PLCH2	3.99476	5.2473	19.3149	1.068e-24	1.24204e-22	46.0491
ENSG00000167996	FTH1	2495	E9PK45	ENSG00000167996_FTH1	-2.76436	9.71918	-19.3089	1.08262e-24	1.25064e-22	45.8217
ENSG00000172345	STARD5	80765	Q9NSY2	ENSG00000172345_STARD5	2.46632	2.79521	19.2706	1.18114e-24	1.34973e-22	45.9571
ENSG00000187796	CARD9	64170	NA	ENSG00000187796_CARD9	-4.60253	1.70039	-19.2695	1.18398e-24	1.34973e-22	45.4542
ENSG00000237330	RNF223	401934	E7ERA6	ENSG00000237330_RNF223	-6.27594	-0.739868	-19.2169	1.33448e-24	1.50155e-22	44.0763
ENSG00000125730	C3	718	P01024	ENSG00000125730_C3	-5.89045	7.78121	-19.1575	1.52792e-24	1.70812e-22	45.5935
ENSG00000152661	GJA1	2697	P17302	ENSG00000152661_GJA1	2.84478	6.59151	19.0225	2.08119e-24	2.297e-22	45.2373
ENSG00000087916	NA	NA	NA	ENSG00000087916_NA	-6.92612	5.19128	-19.0245	2.07169e-24	2.297e-22	45.426
ENSG00000111816	FRK	2444	P42685	ENSG00000111816_FRK	-1.72483	5.28405	-19.0147	2.11881e-24	2.32371e-22	45.3046
ENSG00000141736	ERBB2	2064	P04626	ENSG00000141736_ERBB2	-1.3269	7.2171	-18.9912	2.23636e-24	2.42198e-22	45.1217
ENSG00000143217	NECTIN4	81607	Q96NY8	ENSG00000143217_NECTIN4	-4.57587	3.81429	-18.9933	2.22574e-24	2.42198e-22	45.3276
ENSG00000139318	DUSP6	1848	Q16828	ENSG00000139318_DUSP6	2.19854	7.53751	18.9846	2.27071e-24	2.4439e-22	45.0997
ENSG00000272327	NA	NA	NA	ENSG00000272327_NA	4.45972	3.17927	18.9781	2.30465e-24	2.46292e-22	45.2525
ENSG00000168447	SCNN1B	6338	NA	ENSG00000168447_SCNN1B	-6.53698	2.01942	-18.9759	2.31681e-24	2.46292e-22	44.8929
ENSG00000168398	BDKRB2	624	P30411	ENSG00000168398_BDKRB2	5.10377	3.41135	18.9582	2.41259e-24	2.5491e-22	45.202
ENSG00000167767	KRT80	144501	Q6KB66	ENSG00000167767_KRT80	-6.24974	4.91108	-18.9395	2.51924e-24	2.64566e-22	45.2135
ENSG00000134755	DSC2	1824	Q02487	ENSG00000134755_DSC2	-2.24052	8.24499	-18.9304	2.57252e-24	2.66926e-22	44.9602
ENSG00000139044	B4GALNT3	283358	Q6L9W6	ENSG00000139044_B4GALNT3	-3.69255	4.35443	-18.9306	2.57091e-24	2.66926e-22	45.2115
ENSG00000135373	EHF	26298	NA	ENSG00000135373_EHF	-4.09994	5.98765	-18.9244	2.6084e-24	2.69038e-22	45.0915
ENSG00000171219	CDC42BPG	55561	Q6DT37	ENSG00000171219_CDC42BPG	-1.26369	6.17584	-18.8972	2.77713e-24	2.83111e-22	44.9471
ENSG00000128342	LIF	3976	P15018	ENSG00000128342_LIF	-4.64944	6.10305	-18.8971	2.77753e-24	2.83111e-22	45.0984
ENSG00000001617	SEMA3F	6405	C9J1V2	ENSG00000001617_SEMA3F	1.84212	7.00849	18.8837	2.86487e-24	2.90307e-22	44.8791
ENSG00000183963	SMTN	6525	C9JBH9	ENSG00000183963_SMTN	1.81091	7.5993	18.8799	2.89032e-24	2.91183e-22	44.8497
ENSG00000001561	ENPP4	22875	Q9Y6X5	ENSG00000001561_ENPP4	-4.25049	3.13661	-18.849	3.10377e-24	3.0999e-22	44.9111
ENSG00000189143	CLDN4	1364	NA	ENSG00000189143_CLDN4	-5.3036	5.12915	-18.8478	3.11278e-24	3.0999e-22	45.0194
ENSG00000273045	C2orf15	150590	Q8WU43	ENSG00000273045_C2orf15	-2.35714	1.35748	-18.7968	3.50212e-24	3.44799e-22	44.6032
ENSG00000160691	SHC1	6464	P29353	ENSG00000160691_SHC1	1.66802	8.7188	18.7805	3.63667e-24	3.56024e-22	44.5977
ENSG00000105329	TGFB1	7040	M0R2S0	ENSG00000105329_TGFB1	2.67883	5.77233	18.7761	3.67461e-24	3.57717e-22	44.7407
ENSG00000131941	RHPN2	85415	NA	ENSG00000131941_RHPN2	-2.73655	4.16635	-18.7509	3.89512e-24	3.77065e-22	44.7971
ENSG00000174791	RIN1	9610	NA	ENSG00000174791_RIN1	1.63243	5.1433	18.7105	4.27842e-24	4.11869e-22	44.576
ENSG00000171056	SOX7	83595	Q9BT81	ENSG00000171056_SOX7	2.84369	4.00638	18.6902	4.48583e-24	4.2945e-22	44.6511
ENSG00000131149	GSE1	23199	NA	ENSG00000131149_GSE1	-1.4366	5.96911	-18.6721	4.67848e-24	4.45432e-22	44.4357
ENSG00000133985	TTC9	23508	Q92623	ENSG00000133985_TTC9	-3.41798	5.07444	-18.6686	4.71688e-24	4.46634e-22	44.5727
ENSG00000167641	PPP1R14A	94274	A0A0B4J2A3	ENSG00000167641_PPP1R14A	3.98852	2.83496	18.6577	4.83818e-24	4.5563e-22	44.5084
ENSG00000163453	IGFBP7	3490	NA	ENSG00000163453_IGFBP7	4.01733	5.66385	18.6519	4.90429e-24	4.5936e-22	44.504
ENSG00000101443	WFDC2	10406	Q14508	ENSG00000101443_WFDC2	-5.66198	4.71778	-18.6091	5.41902e-24	5.04843e-22	44.4642
ENSG00000142677	IL22RA1	58985	Q8N6P7	ENSG00000142677_IL22RA1	3.17053	1.17089	18.5853	5.72769e-24	5.27922e-22	44.0897
ENSG00000114805	PLCH1	23007	Q4KWH8	ENSG00000114805_PLCH1	-4.2584	1.28378	-18.586	5.71886e-24	5.27922e-22	43.9297
ENSG00000156711	MAPK13	5603	NA	ENSG00000156711_MAPK13	-2.25837	5.274	-18.575	5.86708e-24	5.37909e-22	44.2937
ENSG00000088970	KIZ	55857	Q2M2Z5	ENSG00000088970_KIZ	2.19455	4.1308	18.5683	5.95963e-24	5.43518e-22	44.3587
ENSG00000113645	WWC1	23286	Q8IX03	ENSG00000113645_WWC1	-1.54494	6.33413	-18.5609	6.06379e-24	5.47257e-22	44.1585
ENSG00000117461	PIK3R3	8503	Q92569	ENSG00000117461_PIK3R3	-2.90534	6.0899	-18.5615	6.0551e-24	5.47257e-22	44.2245
ENSG00000109654	TRIM2	23321	NA	ENSG00000109654_TRIM2	-2.70916	6.49028	-18.4992	7.00593e-24	6.29009e-22	44.0435
ENSG00000102230	PCYT1B	9468	Q9Y5K3	ENSG00000102230_PCYT1B	2.937	3.66469	18.4426	8.00147e-24	7.14688e-22	44.0823
ENSG00000152078	TMEM56	148534	Q96MV1	ENSG00000152078_TMEM56	-4.21225	2.5481	-18.4127	8.58433e-24	7.62817e-22	43.8266
ENSG00000197822	OCLN	100506658	Q16625	ENSG00000197822_OCLN	-3.94289	3.28502	-18.4058	8.72625e-24	7.71472e-22	43.9531
ENSG00000133131	MORC4	79710	S4R3U3	ENSG00000133131_MORC4	1.12015	5.28108	18.3179	1.07333e-23	9.44098e-22	43.6516
ENSG00000069956	MAPK6	5597	NA	ENSG00000069956_MAPK6	1.09162	7.28866	18.262	1.22501e-23	1.07207e-21	43.3935
ENSG00000112343	TRIM38	10475	O00635	ENSG00000112343_TRIM38	-1.04386	5.55796	-18.2566	1.2409e-23	1.08052e-21	43.4791
ENSG00000163072	NOSTRIN	115677	Q8IVI9	ENSG00000163072_NOSTRIN	-4.58182	-1.54106	-18.2449	1.27588e-23	1.10542e-21	42.1614
ENSG00000167880	EVPL	2125	K7EQ87	ENSG00000167880_EVPL	-2.00458	5.54595	-18.2362	1.30224e-23	1.12265e-21	43.4469
ENSG00000179403	VWA1	64856	J3QLP3	ENSG00000179403_VWA1	-3.14399	6.38077	-18.2247	1.33839e-23	1.1481e-21	43.411
ENSG00000133808	MICALCL	84953	NA	ENSG00000133808_MICALCL	2.44735	4.27238	18.1879	1.46035e-23	1.23439e-21	43.4656
ENSG00000082438	COBLL1	22837	NA	ENSG00000082438_COBLL1	1.44343	5.619	18.1892	1.45577e-23	1.23439e-21	43.3129
ENSG00000188290	HES4	57801	E9PB28	ENSG00000188290_HES4	-4.26005	2.65059	-18.1914	1.44816e-23	1.23439e-21	43.331
ENSG00000173269	MMRN2	79812	Q9H8L6	ENSG00000173269_MMRN2	3.0625	2.62044	18.1701	1.52349e-23	1.28151e-21	43.4126
ENSG00000164543	STK17A	9263	NA	ENSG00000164543_STK17A	1.67134	7.19845	18.1243	1.69881e-23	1.42207e-21	43.0704
ENSG00000103534	TMC5	79838	NA	ENSG00000103534_TMC5	-4.31572	3.53184	-18.0728	1.92056e-23	1.59997e-21	43.1797
ENSG00000107679	PLEKHA1	59338	NA	ENSG00000107679_PLEKHA1	1.45104	6.57895	18.0475	2.04028e-23	1.67554e-21	42.9102
ENSG00000132698	RAB25	57111	P57735	ENSG00000132698_RAB25	-1.66715	6.07149	-18.0494	2.03066e-23	1.67554e-21	42.9588
ENSG00000069020	MAST4	375449	J3QT34	ENSG00000069020_MAST4	1.81012	6.7218	18.0286	2.13446e-23	1.74462e-21	42.8633
ENSG00000272087	RP11-379F4.7	NA	NA	ENSG00000272087_RP11-379F4.7	-6.25202	-0.577622	-18.0157	2.20114e-23	1.78231e-21	41.8049
ENSG00000167779	IGFBP6	3489	F8VYK9	ENSG00000167779_IGFBP6	3.0154	5.61224	18.0133	2.21404e-23	1.78441e-21	42.937
ENSG00000186462	NAP1L2	4674	Q9ULW6	ENSG00000186462_NAP1L2	3.60479	0.48197	17.9515	2.56667e-23	2.04284e-21	42.3584
ENSG00000248905	FMN1	342184	Q68DA7	ENSG00000248905_FMN1	-1.92082	4.72954	-17.9546	2.54804e-23	2.04284e-21	42.8573
ENSG00000248846	CTD-2016O11.1	NA	NA	ENSG00000248846_CTD-2016O11.1	-4.84914	-2.37257	-17.951	2.57005e-23	2.04284e-21	41.0102
ENSG00000166619	BLCAP	10904	NA	ENSG00000166619_BLCAP	1.01811	7.00393	17.9451	2.60642e-23	2.06229e-21	42.6403
ENSG00000118263	KLF7	8609	O75840	ENSG00000118263_KLF7	1.99303	7.29956	17.923	2.74871e-23	2.16498e-21	42.5855
ENSG00000182957	SPATA13	221178	Q96N96	ENSG00000182957_SPATA13	-2.59712	2.81041	-17.9092	2.84081e-23	2.2274e-21	42.8007
ENSG00000139117	CPNE8	144402	NA	ENSG00000139117_CPNE8	4.61492	2.24769	17.8788	3.05614e-23	2.38544e-21	42.541
ENSG00000196754	S100A2	6273	P29034	ENSG00000196754_S100A2	2.97368	10.8153	17.8398	3.35719e-23	2.60867e-21	42.3496
ENSG00000048740	CELF2	10659	NA	ENSG00000048740_CELF2	-3.80295	3.03867	-17.8345	3.40033e-23	2.6304e-21	42.6294
ENSG00000250786	SNHG18	NA	NA	ENSG00000250786_SNHG18	4.01484	1.89837	17.8231	3.49531e-23	2.69186e-21	42.3872
ENSG00000174099	MSRB3	253827	Q8IXL7	ENSG00000174099_MSRB3	4.34464	3.4714	17.7797	3.88101e-23	2.97567e-21	42.4726
ENSG00000182916	TCEAL7	56849	Q9BRU2	ENSG00000182916_TCEAL7	4.8096	0.0783986	17.749	4.17909e-23	3.1901e-21	41.5305
ENSG00000074527	NTN4	59277	Q9HB63	ENSG00000074527_NTN4	-2.74134	6.52829	-17.7359	4.31377e-23	3.27846e-21	42.2237
ENSG00000130768	SMPDL3B	27293	Q92485	ENSG00000130768_SMPDL3B	-2.27332	4.35732	-17.7237	4.44305e-23	3.36197e-21	42.3415
ENSG00000134531	EMP1	2012	P54849	ENSG00000134531_EMP1	-2.04479	9.39069	-17.7087	4.6076e-23	3.47133e-21	42.0302
ENSG00000183723	CMTM4	146223	NA	ENSG00000183723_CMTM4	-1.14398	7.20156	-17.7036	4.66532e-23	3.49959e-21	42.0517
ENSG00000129422	MTUS1	57509	NA	ENSG00000129422_MTUS1	-1.5103	6.91589	-17.6858	4.87025e-23	3.63237e-21	42.0235
ENSG00000165105	RASEF	158158	Q8IZ41	ENSG00000165105_RASEF	-3.59163	3.8473	-17.6846	4.88424e-23	3.63237e-21	42.284
ENSG00000091409	ITGA6	3655	C9JXX7	ENSG00000091409_ITGA6	2.37106	10.1002	17.6615	5.16663e-23	3.82595e-21	41.9105
ENSG00000119899	SLC17A5	26503	Q9NRA2	ENSG00000119899_SLC17A5	-1.6894	4.88994	-17.6587	5.20089e-23	3.83494e-21	42.1283
ENSG00000012061	ERCC1	2067	P07992	ENSG00000012061_ERCC1	1.57719	6.62764	17.6281	5.60255e-23	4.1136e-21	41.8923
ENSG00000154511	FAM69A	388650	Q5T7M9	ENSG00000154511_FAM69A	2.77709	4.40567	17.5872	6.1877e-23	4.52407e-21	42.0202
ENSG00000008283	CYB561	1534	P49447	ENSG00000008283_CYB561	-1.01785	6.68211	-17.5824	6.26182e-23	4.55902e-21	41.7814
ENSG00000153714	LURAP1L	286343	Q8IV03	ENSG00000153714_LURAP1L	-2.14741	5.04172	-17.5719	6.42398e-23	4.65752e-21	41.9217
ENSG00000181458	TMEM45A	55076	Q9NWC5	ENSG00000181458_TMEM45A	-3.36902	6.35403	-17.5458	6.84526e-23	4.94228e-21	41.769
ENSG00000163219	ARHGAP25	9938	B7Z8K7	ENSG00000163219_ARHGAP25	4.59555	3.40006	17.5279	7.14996e-23	5.14085e-21	41.8813
ENSG00000134363	FST	10468	P19883	ENSG00000134363_FST	4.03637	6.21989	17.4997	7.65964e-23	5.48455e-21	41.6557
ENSG00000134909	ARHGAP32	9743	A7KAX9	ENSG00000134909_ARHGAP32	-1.19861	6.67031	-17.4323	9.03289e-23	6.44123e-21	41.405
ENSG00000246228	CASC8	727677	NA	ENSG00000246228_CASC8	-3.18493	0.721499	-17.4196	9.31793e-23	6.61726e-21	41.192
ENSG00000128805	ARHGAP22	58504	Q7Z5H3	ENSG00000128805_ARHGAP22	2.07778	3.871	17.4176	9.36397e-23	6.62281e-21	41.6202
ENSG00000111252	SH2B3	10019	Q9UQQ2	ENSG00000111252_SH2B3	1.7376	5.47841	17.4063	9.62808e-23	6.78193e-21	41.4372
ENSG00000172548	NIPAL4	348938	Q0D2K0	ENSG00000172548_NIPAL4	4.15451	4.20975	17.3926	9.95722e-23	6.95721e-21	41.5636
ENSG00000177459	ERICH5	203111	Q6P6B1	ENSG00000177459_ERICH5	-4.176	0.407873	-17.3889	1.00472e-22	6.96395e-21	40.892
ENSG00000006740	ARHGAP44	9912	Q17R89	ENSG00000006740_ARHGAP44	-4.52611	1.39165	-17.3901	1.00166e-22	6.96395e-21	41.1897
ENSG00000084112	SSH1	54434	Q8WYL5	ENSG00000084112_SSH1	1.0527	7.10843	17.3814	1.0235e-22	7.03775e-21	41.2595
ENSG00000178531	CTXN1	404217	P60606	ENSG00000178531_CTXN1	-3.30431	3.16725	-17.3816	1.02296e-22	7.03775e-21	41.5287
ENSG00000149557	FEZ1	9638	NA	ENSG00000149557_FEZ1	4.73184	4.62964	17.3637	1.06896e-22	7.32131e-21	41.4982
ENSG00000176692	FOXC2	2303	Q99958	ENSG00000176692_FOXC2	5.06573	1.17461	17.3534	1.09617e-22	7.47815e-21	40.9131
ENSG00000100154	TTC28	23331	Q96AY4	ENSG00000100154_TTC28	3.41915	2.3278	17.3485	1.10948e-22	7.53923e-21	41.4097
ENSG00000013588	GPRC5A	693199	Q8NFJ5	ENSG00000013588_GPRC5A	-3.21459	8.75136	-17.3445	1.12061e-22	7.5851e-21	41.1461
ENSG00000111057	KRT18	3875	F8VZY9	ENSG00000111057_KRT18	-2.51233	7.9284	-17.3384	1.1373e-22	7.66815e-21	41.1413
ENSG00000172031	EPHX4	253152	Q8IUS5	ENSG00000172031_EPHX4	-3.01286	2.70475	-17.3357	1.14511e-22	7.69091e-21	41.4093
ENSG00000174136	RGMB	285704	NA	ENSG00000174136_RGMB	1.1715	5.53816	17.3326	1.15385e-22	7.71965e-21	41.2302
ENSG00000169604	ANTXR1	84168	Q9H6X2	ENSG00000169604_ANTXR1	1.38411	6.4345	17.3107	1.21759e-22	8.11476e-21	41.1261
ENSG00000171517	LPAR3	23566	Q9UBY5	ENSG00000171517_LPAR3	3.93684	4.50125	17.2984	1.25514e-22	8.333e-21	41.3153
ENSG00000138642	HERC6	55008	Q8IVU3	ENSG00000138642_HERC6	-1.74885	4.90779	-17.2488	1.41848e-22	9.38149e-21	41.1075
ENSG00000173890	GPR160	26996	Q9UJ42	ENSG00000173890_GPR160	-3.7169	0.786212	-17.2469	1.42507e-22	9.38919e-21	40.792
ENSG00000196368	NUDT11	55190	Q96G61	ENSG00000196368_NUDT11	4.90331	1.90617	17.2424	1.44087e-22	9.45736e-21	40.931
ENSG00000168461	RAB31	11031	Q13636	ENSG00000168461_RAB31	1.79199	6.14756	17.2349	1.46804e-22	9.56323e-21	40.9593
ENSG00000137747	TMPRSS13	84000	Q9BYE2	ENSG00000137747_TMPRSS13	-6.78133	1.96735	-17.2355	1.46589e-22	9.56323e-21	40.6317
ENSG00000171462	DLK2	65989	H0Y5P1	ENSG00000171462_DLK2	4.12282	3.27877	17.2093	1.56381e-22	1.0149e-20	41.1223
ENSG00000262160	RP11-96D1.11	NA	NA	ENSG00000262160_RP11-96D1.11	-1.0637	4.34473	-17.2058	1.57738e-22	1.01988e-20	41.0365
ENSG00000008853	RHOBTB2	23221	Q9BYZ6	ENSG00000008853_RHOBTB2	2.1136	5.5757	17.1823	1.67181e-22	1.07692e-20	40.8701
ENSG00000198369	SPRED2	200734	Q7Z698	ENSG00000198369_SPRED2	1.18437	6.0597	17.1783	1.68846e-22	1.08362e-20	40.8027
ENSG00000148735	PLEKHS1	79949	Q5SXH7	ENSG00000148735_PLEKHS1	-7.40794	1.40946	-17.1666	1.73818e-22	1.11141e-20	40.287
ENSG00000145335	SNCA	6622	P37840	ENSG00000145335_SNCA	4.93147	3.15996	17.1453	1.8322e-22	1.16722e-20	40.8999
ENSG00000169641	LUZP1	7798	Q86V48	ENSG00000169641_LUZP1	1.00975	7.64436	17.1377	1.86718e-22	1.18441e-20	40.634
ENSG00000188559	RALGAPA2	57186	H7C1F9	ENSG00000188559_RALGAPA2	-1.25519	5.95599	-17.1365	1.87286e-22	1.18441e-20	40.7184
ENSG00000174502	SLC26A9	115019	Q7LBE3	ENSG00000174502_SLC26A9	-4.98335	-2.48345	-17.129	1.90776e-22	1.2021e-20	39.2922
ENSG00000128833	MYO5C	55930	Q9NQX4	ENSG00000128833_MYO5C	-3.96962	5.193	-17.1162	1.96939e-22	1.23643e-20	40.8189
ENSG00000112902	SEMA5A	9037	Q13591	ENSG00000112902_SEMA5A	5.40261	3.24772	17.1057	2.02123e-22	1.2644e-20	40.7942
ENSG00000118855	MFSD1	64747	C9JBA3	ENSG00000118855_MFSD1	-1.33416	6.36294	-17.0959	2.07124e-22	1.29102e-20	40.5872
ENSG00000162493	PDPN	10630	Q86YL7	ENSG00000162493_PDPN	5.13531	3.1392	17.0777	2.16683e-22	1.34577e-20	40.7531
ENSG00000244405	ETV5	2119	P41161	ENSG00000244405_ETV5	1.61701	5.4894	17.0753	2.18011e-22	1.34918e-20	40.6058
ENSG00000128641	MYO1B	4430	C9JYW1	ENSG00000128641_MYO1B	1.72812	9.13594	17.0668	2.2269e-22	1.37323e-20	40.4345
ENSG00000175832	ETV4	2118	P43268	ENSG00000175832_ETV4	1.54131	5.19584	17.0558	2.28856e-22	1.40625e-20	40.5867
ENSG00000118200	CAMSAP2	23271	Q08AD1	ENSG00000118200_CAMSAP2	1.05135	7.11149	17.0538	2.29996e-22	1.40826e-20	40.4366
ENSG00000103044	HAS3	3038	O00219	ENSG00000103044_HAS3	3.24902	6.9648	17.0348	2.41094e-22	1.47102e-20	40.4197
ENSG00000179299	NSUN7	79730	Q8NE18	ENSG00000179299_NSUN7	-5.48312	-0.393938	-17.0248	2.47204e-22	1.503e-20	39.7052
ENSG00000176485	PLA2G16	11145	P53816	ENSG00000176485_PLA2G16	-5.01952	4.42093	-17.0144	2.53716e-22	1.5372e-20	40.6473
ENSG00000090006	LTBP4	8425	A0A087X0A7	ENSG00000090006_LTBP4	1.60031	5.63962	17.0038	2.605e-22	1.56734e-20	40.4046
ENSG00000143147	GPR161	23432	Q8N6U8	ENSG00000143147_GPR161	1.82738	4.11423	16.9842	2.7356e-22	1.64022e-20	40.544
ENSG00000196743	GM2A	2760	E5RJD0	ENSG00000196743_GM2A	1.99246	7.10703	16.9715	2.82362e-22	1.68716e-20	40.2386
ENSG00000106571	GLI3	2737	P10071	ENSG00000106571_GLI3	2.56572	4.93707	16.9645	2.87369e-22	1.71118e-20	40.422
ENSG00000153721	CNKSR3	154043	Q6P9H4	ENSG00000153721_CNKSR3	-2.1085	3.83827	-16.9427	3.03404e-22	1.80048e-20	40.4482
ENSG00000174125	TLR1	7096	NA	ENSG00000174125_TLR1	-5.59289	2.95674	-16.9374	3.07482e-22	1.81845e-20	40.2986
ENSG00000159640	ACE	1636	NA	ENSG00000159640_ACE	-3.87782	2.77571	-16.934	3.10077e-22	1.82755e-20	40.4059
ENSG00000106605	BLVRA	644	P53004	ENSG00000106605_BLVRA	1.34825	4.94222	16.9217	3.19796e-22	1.87845e-20	40.288
ENSG00000104081	BMF	90427	Q96LC9	ENSG00000104081_BMF	-3.65146	1.38463	-16.887	3.48856e-22	2.04222e-20	40.0274
ENSG00000185222	TCEAL9	51186	Q9UHQ7	ENSG00000185222_TCEAL9	1.26167	5.06197	16.868	3.65825e-22	2.13435e-20	40.1387
ENSG00000163689	C3orf67	200844	H0Y8H3	ENSG00000163689_C3orf67	2.09385	2.79497	16.8367	3.95771e-22	2.30132e-20	40.2044
ENSG00000159788	RGS12	6002	NA	ENSG00000159788_RGS12	1.09124	5.49402	16.8322	4.00269e-22	2.31969e-20	39.9715
ENSG00000088002	SULT2B1	6820	O00204	ENSG00000088002_SULT2B1	-4.05324	1.91209	-16.7854	4.50233e-22	2.60054e-20	39.987
ENSG00000122515	ZMIZ2	83637	Q8NF64	ENSG00000122515_ZMIZ2	-1.27352	6.23471	-16.7413	5.03129e-22	2.89642e-20	39.6904
ENSG00000203499	FAM83H-AS1	NA	NA	ENSG00000203499_FAM83H-AS1	-1.66594	5.13009	-16.7299	5.17764e-22	2.9708e-20	39.7828
ENSG00000152022	NA	NA	NA	ENSG00000152022_NA	1.54509	4.77857	16.7154	5.37031e-22	3.07118e-20	39.7765
ENSG00000134243	SORT1	6272	Q99523	ENSG00000134243_SORT1	-2.10834	7.27145	-16.6992	5.59484e-22	3.18906e-20	39.5595
ENSG00000101187	SLCO4A1	28231	E1P5H9	ENSG00000101187_SLCO4A1	-4.08311	1.65867	-16.6759	5.93389e-22	3.37123e-20	39.672
ENSG00000235884	LINC00941	NA	NA	ENSG00000235884_LINC00941	3.19912	1.87701	16.6563	6.23571e-22	3.53112e-20	39.6921
ENSG00000233901	LINC01503	100506119	NA	ENSG00000233901_LINC01503	2.21663	2.17229	16.6515	6.31304e-22	3.56327e-20	39.7175
ENSG00000185963	BICD2	23299	Q8TD16	ENSG00000185963_BICD2	1.1074	7.19911	16.6359	6.56604e-22	3.65841e-20	39.3733
ENSG00000141449	GREB1L	80000	NA	ENSG00000141449_GREB1L	-5.44656	2.32532	-16.6372	6.54547e-22	3.65841e-20	39.488
ENSG00000007062	PROM1	8842	H0Y9D4	ENSG00000007062_PROM1	-6.68997	4.93924	-16.6373	6.5436e-22	3.65841e-20	39.7063
ENSG00000126091	ST3GAL3	6487	E9PJI3	ENSG00000126091_ST3GAL3	1.99452	2.17257	16.6252	6.74721e-22	3.74729e-20	39.6526
ENSG00000125148	MT2A	4502	P02795	ENSG00000125148_MT2A	2.57808	9.27943	16.6138	6.94586e-22	3.83736e-20	39.2863
ENSG00000166348	USP54	159195	H7C296	ENSG00000166348_USP54	-1.77639	5.32383	-16.6133	6.95366e-22	3.83736e-20	39.4772
ENSG00000186469	GNG2	54331	G3V3J9	ENSG00000186469_GNG2	4.09558	1.49989	16.6067	7.07123e-22	3.88985e-20	39.3589
ENSG00000171467	ZNF318	24149	NA	ENSG00000171467_ZNF318	1.07845	6.02298	16.5901	7.37593e-22	4.04462e-20	39.3193
ENSG00000183853	KIRREL	55243	Q5W0F9	ENSG00000183853_KIRREL	1.89478	7.36458	16.5389	8.39962e-22	4.59144e-20	39.1292
ENSG00000087903	RFX2	5990	P48378	ENSG00000087903_RFX2	1.82945	3.03141	16.5281	8.63438e-22	4.69018e-20	39.4259
ENSG00000101457	DNTTIP1	116092	Q9H147	ENSG00000101457_DNTTIP1	-1.19423	5.44048	-16.5122	8.99023e-22	4.86821e-20	39.189
ENSG00000151617	EDNRA	1909	P25101	ENSG00000151617_EDNRA	4.62981	3.99402	16.5081	9.08436e-22	4.90386e-20	39.3794
ENSG00000078177	N4BP2	55728	Q86UW6	ENSG00000078177_N4BP2	1.83705	3.35155	16.4936	9.42686e-22	5.05789e-20	39.3241
ENSG00000132334	PTPRE	5791	P23469	ENSG00000132334_PTPRE	1.35459	5.75815	16.4935	9.42808e-22	5.05789e-20	39.1023
ENSG00000172081	MOB3A	126308	Q96BX8	ENSG00000172081_MOB3A	1.30228	6.48377	16.4923	9.45849e-22	5.05854e-20	39.041
ENSG00000166033	HTRA1	5654	Q92743	ENSG00000166033_HTRA1	4.90285	6.63655	16.4691	1.00332e-21	5.34937e-20	39.0896
ENSG00000161091	MFSD12	126321	A0A087WU85	ENSG00000161091_MFSD12	-1.40413	6.88722	-16.4388	1.08416e-21	5.76267e-20	38.8912
ENSG00000143515	ATP8B2	57198	P98198	ENSG00000143515_ATP8B2	4.18412	3.16982	16.4354	1.09363e-21	5.79525e-20	39.1903
ENSG00000165895	ARHGAP42	143872	E9PJK4	ENSG00000165895_ARHGAP42	-2.18754	2.87935	-16.416	1.14906e-21	6.07038e-20	39.1475
ENSG00000167363	FN3K	64122	Q9H479	ENSG00000167363_FN3K	-2.7955	1.66615	-16.4143	1.15414e-21	6.07868e-20	39.0006
ENSG00000121297	TSHZ3	57616	Q63HK5	ENSG00000121297_TSHZ3	2.45295	3.4714	16.4081	1.17244e-21	6.15637e-20	39.0974
ENSG00000182489	XKRX	402415	Q6PP77	ENSG00000182489_XKRX	-3.32156	-0.210366	-16.3954	1.21144e-21	6.34193e-20	38.4435
ENSG00000008083	JARID2	3720	Q92833	ENSG00000008083_JARID2	1.35129	5.70859	16.3665	1.30423e-21	6.80714e-20	38.7808
ENSG00000183722	LHFP	10186	Q9Y693	ENSG00000183722_LHFP	2.29557	3.59096	16.3443	1.38078e-21	7.18505e-20	38.9559
ENSG00000165804	ZNF219	51222	Q9P2Y4	ENSG00000165804_ZNF219	2.0333	5.07548	16.3179	1.47754e-21	7.6655e-20	38.7221
ENSG00000237685	RP11-360O19.4	NA	NA	ENSG00000237685_RP11-360O19.4	-3.87198	-3.29645	-16.3051	1.52678e-21	7.89734e-20	37.0823
ENSG00000069188	SDK2	54549	Q58EX2	ENSG00000069188_SDK2	5.21972	3.76179	16.2979	1.55538e-21	8.0213e-20	38.8402
ENSG00000143702	CEP170	645455	Q5SW79	ENSG00000143702_CEP170	1.2162	5.17786	16.2855	1.60571e-21	8.25628e-20	38.6296
ENSG00000132182	NUP210	23225	Q8TEM1	ENSG00000132182_NUP210	-5.59679	4.22296	-16.2604	1.71259e-21	8.77979e-20	38.75
ENSG00000164904	ALDH7A1	501	NA	ENSG00000164904_ALDH7A1	1.21441	5.88435	16.2579	1.72361e-21	8.78435e-20	38.4815
ENSG00000076826	CAMSAP3	57662	Q9P1Y5	ENSG00000076826_CAMSAP3	-1.34203	4.63133	-16.2587	1.72029e-21	8.78435e-20	38.6135
ENSG00000138411	HECW2	57520	Q9P2P5	ENSG00000138411_HECW2	-6.44994	1.77643	-16.228	1.86162e-21	9.45988e-20	38.2228
ENSG00000184545	DUSP8	1850	Q13202	ENSG00000184545_DUSP8	-4.5137	1.65926	-16.2203	1.89923e-21	9.62276e-20	38.3713
ENSG00000161714	PLCD3	113026	Q8N3E9	ENSG00000161714_PLCD3	1.38108	6.13083	16.2033	1.98418e-21	1.00239e-19	38.3095
ENSG00000185442	FAM174B	400451	Q3ZCQ3	ENSG00000185442_FAM174B	-4.01208	1.28834	-16.1938	2.0334e-21	1.0213e-19	38.3033
ENSG00000081923	ATP8B1	5205	O43520	ENSG00000081923_ATP8B1	-1.27836	6.04489	-16.1916	2.04526e-21	1.02429e-19	38.2957
ENSG00000059122	FLYWCH1	84256	Q4VC44	ENSG00000059122_FLYWCH1	1.51007	5.15413	16.1897	2.055e-21	1.02619e-19	38.368
ENSG00000234678	RP11-465N4.4	NA	NA	ENSG00000234678_RP11-465N4.4	-5.64776	-0.404979	-16.1679	2.17421e-21	1.0826e-19	37.6724
ENSG00000155760	FZD7	8324	O75084	ENSG00000155760_FZD7	-2.36858	6.07253	-16.1578	2.23169e-21	1.10804e-19	38.2747
ENSG00000212864	RNF208	727800	Q9H0X6	ENSG00000212864_RNF208	-2.97601	0.923494	-16.1424	2.32238e-21	1.14978e-19	38.2374
ENSG00000100739	BDKRB1	623	P46663	ENSG00000100739_BDKRB1	5.19532	-0.971589	16.1179	2.47433e-21	1.22151e-19	37.5466
ENSG00000078114	NEBL	10529	O76041	ENSG00000078114_NEBL	-4.13055	5.80293	-16.1115	2.51579e-21	1.23845e-19	38.226
ENSG00000158246	FAM46B	115572	Q96A09	ENSG00000158246_FAM46B	-1.65921	4.92888	-16.0934	2.63634e-21	1.29412e-19	38.1401
ENSG00000064601	CTSA	5476	NA	ENSG00000064601_CTSA	-1.15992	6.50098	-16.0703	2.79928e-21	1.37022e-19	37.9499
ENSG00000260244	RP11-588K22.2	NA	NA	ENSG00000260244_RP11-588K22.2	-5.48391	2.59895	-16.0602	2.87323e-21	1.39941e-19	38.1034
ENSG00000128656	CHN1	1123	P15882	ENSG00000128656_CHN1	-2.11892	4.39492	-16.0514	2.94024e-21	1.42713e-19	38.147
ENSG00000130545	CRB3	92359	Q9BUF7	ENSG00000130545_CRB3	-1.3881	3.6287	-16.0434	3.00169e-21	1.45288e-19	38.1588
ENSG00000148488	ST8SIA6	338596	H0Y405	ENSG00000148488_ST8SIA6	-5.47448	-1.34139	-16.0401	3.02726e-21	1.46118e-19	37.1823
ENSG00000197119	SLC25A29	123096	Q8N8R3	ENSG00000197119_SLC25A29	-2.05423	4.65453	-16.032	3.09178e-21	1.48818e-19	38.0412
ENSG00000168763	CNNM3	26505	Q8NE01	ENSG00000168763_CNNM3	-1.20642	3.88846	-16.0301	3.10745e-21	1.49158e-19	38.1018
ENSG00000165655	ZNF503	84858	Q96F45	ENSG00000165655_ZNF503	2.10496	3.78177	16.0279	3.12465e-21	1.49569e-19	38.0749
ENSG00000132003	ZSWIM4	65249	Q9H7M6	ENSG00000132003_ZSWIM4	-2.11276	4.23799	-15.9956	3.39876e-21	1.62242e-19	38.0142
ENSG00000165071	TMEM71	137835	NA	ENSG00000165071_TMEM71	-5.40762	-1.40615	-15.9936	3.41637e-21	1.62634e-19	37.0115
ENSG00000234456	MAGI2-AS3	100505881	NA	ENSG00000234456_MAGI2-AS3	4.97255	1.53793	15.9923	3.4278e-21	1.62731e-19	37.84
ENSG00000120820	GLT8D2	83468	Q9H1C3	ENSG00000120820_GLT8D2	2.15947	3.63841	15.9844	3.49945e-21	1.65679e-19	38.0123
ENSG00000151474	FRMD4A	55691	Q9P2Q2	ENSG00000151474_FRMD4A	1.54843	5.13561	15.9741	3.59421e-21	1.69702e-19	37.8166
ENSG00000088367	EPB41L1	2036	Q9H4G0	ENSG00000088367_EPB41L1	-2.234	5.58271	-15.9639	3.69137e-21	1.73815e-19	37.7827
ENSG00000084636	COL16A1	1307	Q07092	ENSG00000084636_COL16A1	1.62301	6.61634	15.9618	3.71149e-21	1.74289e-19	37.6496
ENSG00000106278	PTPRZ1	5803	P23471	ENSG00000106278_PTPRZ1	4.30986	5.08241	15.9461	3.86686e-21	1.81095e-19	37.8553
ENSG00000180739	S1PR5	53637	Q9H228	ENSG00000180739_S1PR5	3.64897	1.84638	15.9429	3.89958e-21	1.82135e-19	37.8718
ENSG00000169435	RASSF6	166824	Q6ZTQ3	ENSG00000169435_RASSF6	2.50357	4.68662	15.941	3.91849e-21	1.82526e-19	37.8137
ENSG00000005884	ITGA3	3675	D6R9X8	ENSG00000005884_ITGA3	1.42949	10.4596	15.9297	4.03553e-21	1.87474e-19	37.5004
ENSG00000157827	FMNL2	114793	Q96PY5	ENSG00000157827_FMNL2	1.56341	6.91444	15.8861	4.52296e-21	2.08997e-19	37.436
ENSG00000162069	BICDL2	146439	NA	ENSG00000162069_BICDL2	-5.17283	3.08548	-15.8796	4.60002e-21	2.11992e-19	37.7389
ENSG00000169851	PCDH7	5099	O60245	ENSG00000169851_PCDH7	4.50896	3.83971	15.8719	4.69429e-21	2.15763e-19	37.744
ENSG00000120162	MOB3B	79817	Q86TA1	ENSG00000120162_MOB3B	1.26759	6.02819	15.8293	5.24844e-21	2.3996e-19	37.3431
ENSG00000227036	LINC00511	400619	NA	ENSG00000227036_LINC00511	-1.74448	5.62498	-15.7979	5.69808e-21	2.5915e-19	37.321
ENSG00000105357	MYH14	79784	Q7Z406	ENSG00000105357_MYH14	-7.00292	3.88758	-15.79	5.81718e-21	2.63875e-19	37.5088
ENSG00000064042	LIMCH1	22998	Q9UPQ0	ENSG00000064042_LIMCH1	-7.00055	3.1593	-15.7819	5.94284e-21	2.68871e-19	37.3866
ENSG00000185088	RPS27L	51065	NA	ENSG00000185088_RPS27L	-1.16125	6.38271	-15.7661	6.19511e-21	2.79554e-19	37.1624
ENSG00000174233	ADCY6	112	NA	ENSG00000174233_ADCY6	-1.5333	5.95274	-15.7569	6.34654e-21	2.85644e-19	37.168
ENSG00000183111	ARHGEF37	389337	D6RJH4	ENSG00000183111_ARHGEF37	-1.85165	5.38941	-15.7283	6.84213e-21	3.07152e-19	37.173
ENSG00000089486	CDIP1	29965	Q9H305	ENSG00000089486_CDIP1	2.42585	4.92422	15.6921	7.52775e-21	3.36686e-19	37.1154
ENSG00000147650	LRP12	29967	Q9Y561	ENSG00000147650_LRP12	1.20636	5.1889	15.6915	7.53891e-21	3.36686e-19	37.0599
ENSG00000197122	SRC	6714	NA	ENSG00000197122_SRC	1.03126	6.54042	15.6853	7.66367e-21	3.41378e-19	36.9223
ENSG00000149256	TENM4	26011	Q6N022	ENSG00000149256_TENM4	4.73161	2.02857	15.6764	7.84491e-21	3.48555e-19	37.1643
ENSG00000272079	LA16c-380H5.5	107984895	NA	ENSG00000272079_LA16c-380H5.5	-4.30417	0.179542	-15.6626	8.13569e-21	3.6055e-19	36.7365
ENSG00000119326	CTNNAL1	8727	Q9UBT7	ENSG00000119326_CTNNAL1	2.04417	6.93593	15.6604	8.18319e-21	3.6173e-19	36.8429
ENSG00000153904	DDAH1	23576	O94760	ENSG00000153904_DDAH1	-2.28501	5.08054	-15.6559	8.28208e-21	3.6517e-19	37.0235
ENSG00000142235	LMTK3	114783	Q96Q04	ENSG00000142235_LMTK3	-2.07337	3.87669	-15.647	8.47944e-21	3.72923e-19	37.1022
ENSG00000270107	NA	NA	NA	ENSG00000270107_NA	-5.99242	-2.04776	-15.6434	8.56058e-21	3.75539e-19	36.0202
ENSG00000158315	RHBDL2	54933	Q9NX52	ENSG00000158315_RHBDL2	-2.08631	3.71418	-15.6395	8.6487e-21	3.78446e-19	37.104
ENSG00000196739	COL27A1	85301	Q8IZC6	ENSG00000196739_COL27A1	3.31839	3.91354	15.6382	8.67834e-21	3.78786e-19	37.1121
ENSG00000175893	ZDHHC21	340481	Q8IVQ6	ENSG00000175893_ZDHHC21	-1.24632	4.64698	-15.6365	8.71613e-21	3.7948e-19	36.9598
ENSG00000198948	MFAP3L	9848	O75121	ENSG00000198948_MFAP3L	-1.729	4.00379	-15.6201	9.10328e-21	3.95343e-19	37.0368
ENSG00000176788	BASP1	10409	U3KQP0	ENSG00000176788_BASP1	2.46906	5.56485	15.617	9.17913e-21	3.9764e-19	36.8634
ENSG00000225485	NA	NA	NA	ENSG00000225485_NA	2.14038	5.3761	15.6144	9.24086e-21	3.99316e-19	36.8405
ENSG00000135111	TBX3	6926	O15119	ENSG00000135111_TBX3	2.51532	4.48334	15.5936	9.76548e-21	4.19891e-19	36.9416
ENSG00000146112	PPP1R18	170954	Q6NYC8	ENSG00000146112_PPP1R18	1.13122	6.7913	15.5864	9.95307e-21	4.26898e-19	36.6458
ENSG00000167693	NXN	64359	Q6DKJ4	ENSG00000167693_NXN	1.69355	6.77876	15.5842	1.00096e-20	4.28261e-19	36.6533
ENSG00000116260	QSOX1	5768	O00391	ENSG00000116260_QSOX1	-1.818	8.16568	-15.5622	1.06112e-20	4.50662e-19	36.5457
ENSG00000128602	SMO	6608	Q99835	ENSG00000128602_SMO	1.8047	3.88397	15.5455	1.1091e-20	4.6989e-19	36.8376
ENSG00000104447	TRPS1	7227	Q9UHF7	ENSG00000104447_TRPS1	-1.47111	6.78604	-15.5402	1.12491e-20	4.74267e-19	36.533
ENSG00000178363	CALML3	810	P27482	ENSG00000178363_CALML3	4.21782	7.01235	15.5289	1.15918e-20	4.8635e-19	36.5519
ENSG00000163082	SGPP2	130367	Q8IWX5	ENSG00000163082_SGPP2	-5.41463	2.09218	-15.5152	1.2021e-20	5.0314e-19	36.7381
ENSG00000079257	LXN	56925	H7C5A4	ENSG00000079257_LXN	-2.84395	4.87963	-15.5124	1.21117e-20	5.046e-19	36.6944
ENSG00000180447	GAS1	2619	P54826	ENSG00000180447_GAS1	2.87163	1.73676	15.5087	1.22318e-20	5.08279e-19	36.7618
ENSG00000182667	NTM	50863	Q9P121	ENSG00000182667_NTM	3.77865	3.30327	15.4844	1.30458e-20	5.39516e-19	36.7362
ENSG00000163297	ANTXR2	118429	P58335	ENSG00000163297_ANTXR2	2.81146	5.9386	15.472	1.34839e-20	5.54984e-19	36.4438
ENSG00000077238	IL4R	3566	J9JII2	ENSG00000077238_IL4R	1.32633	6.85201	15.4606	1.39025e-20	5.7086e-19	36.3047
ENSG00000110719	TCIRG1	10312	Q13488	ENSG00000110719_TCIRG1	-1.55893	5.32434	-15.4561	1.40692e-20	5.7634e-19	36.4252
ENSG00000095383	TBC1D2	55357	Q9BYX2	ENSG00000095383_TBC1D2	1.16338	6.26058	15.4388	1.47311e-20	6.01187e-19	36.278
ENSG00000019485	PRDM11	56981	Q9NQV5	ENSG00000019485_PRDM11	2.04195	1.38577	15.4287	1.51342e-20	6.15601e-19	36.5233
ENSG00000105289	TJP3	27134	O95049	ENSG00000105289_TJP3	-7.1397	1.32499	-15.4211	1.54422e-20	6.26657e-19	36.0313
ENSG00000177685	CRACR2B	283229	E9PRE5	ENSG00000177685_CRACR2B	-4.12051	1.97338	-15.4143	1.57278e-20	6.35272e-19	36.4615
ENSG00000131981	LGALS3	3958	G3V407	ENSG00000131981_LGALS3	-1.31942	7.43715	-15.3918	1.66992e-20	6.7294e-19	36.0998
ENSG00000111341	MGP	4256	P08493	ENSG00000111341_MGP	-6.23606	6.49492	-15.3779	1.73327e-20	6.96848e-19	36.2473
ENSG00000144834	TAGLN3	29114	Q9UI15	ENSG00000144834_TAGLN3	3.19031	2.02067	15.37	1.77038e-20	7.1012e-19	36.3977
ENSG00000065618	COL17A1	100126326	Q9UMD9	ENSG00000065618_COL17A1	4.04518	9.04567	15.3637	1.80015e-20	7.20395e-19	36.0097
ENSG00000138061	CYP1B1	1545	NA	ENSG00000138061_CYP1B1	-5.81237	6.23505	-15.3374	1.93128e-20	7.71087e-19	36.2506
ENSG00000110218	PANX1	24145	Q96RD7	ENSG00000110218_PANX1	1.10456	6.08471	15.3356	1.941e-20	7.73188e-19	36.0158
ENSG00000129474	AJUBA	84962	Q96IF1	ENSG00000129474_AJUBA	1.39083	6.87025	15.2828	2.23614e-20	8.88712e-19	35.8238
ENSG00000149575	SCN2B	6327	O60939	ENSG00000149575_SCN2B	5.08186	-0.864048	15.2794	2.25633e-20	8.94683e-19	35.4349
ENSG00000166833	NAV2	89797	Q8IVL1	ENSG00000166833_NAV2	1.62161	5.79	15.27	2.31405e-20	9.15478e-19	35.8695
ENSG00000112299	VNN1	8876	O95497	ENSG00000112299_VNN1	-5.32031	0.984338	-15.2612	2.3695e-20	9.35278e-19	35.8347
ENSG00000129194	SOX15	6665	O60248	ENSG00000129194_SOX15	2.25506	4.6924	15.2317	2.56484e-20	1.01008e-18	35.8653
ENSG00000183742	MACC1	346389	Q6ZN28	ENSG00000183742_MACC1	-3.99223	5.06153	-15.2298	2.57811e-20	1.013e-18	35.9198
ENSG00000105327	BBC3	100422832	NA	ENSG00000105327_BBC3	-2.14484	2.02344	-15.2133	2.69506e-20	1.05656e-18	35.9999
ENSG00000101680	LAMA1	284217	P25391	ENSG00000101680_LAMA1	4.99405	4.8502	15.1792	2.95429e-20	1.15558e-18	35.8907
ENSG00000061918	GUCY1B3	2983	B7Z685	ENSG00000061918_GUCY1B3	-3.39871	3.16818	-15.1702	3.02733e-20	1.18148e-18	35.9017
ENSG00000078124	ACER3	55331	E9PIN9	ENSG00000078124_ACER3	1.34888	6.85259	15.1658	3.06335e-20	1.19285e-18	35.5038
ENSG00000067141	NEO1	4756	Q92859	ENSG00000067141_NEO1	2.70444	4.24458	15.1453	3.23693e-20	1.2548e-18	35.7721
ENSG00000168917	SLC35G2	80723	NA	ENSG00000168917_SLC35G2	2.28018	2.62183	15.1374	3.30749e-20	1.27644e-18	35.814
ENSG00000187554	TLR5	7100	O60602	ENSG00000187554_TLR5	-3.05252	2.70622	-15.1222	3.44537e-20	1.3267e-18	35.7734
ENSG00000126351	THRA	7067	J3QR26	ENSG00000126351_THRA	1.32175	4.49235	15.1005	3.65371e-20	1.4038e-18	35.5674
ENSG00000125735	TNFSF14	8740	O43557	ENSG00000125735_TNFSF14	-6.24294	-0.762987	-15.0883	3.77657e-20	1.4478e-18	34.9028
ENSG00000051523	CYBA	1535	P13498	ENSG00000051523_CYBA	-1.4391	6.46541	-15.0846	3.81499e-20	1.4593e-18	35.3184
ENSG00000112559	MDFI	4188	B1AKB8	ENSG00000112559_MDFI	1.26498	6.48277	15.0722	3.94461e-20	1.50556e-18	35.267
ENSG00000176978	DPP7	29952	Q9UHL4	ENSG00000176978_DPP7	-1.32024	5.45964	-15.065	4.0221e-20	1.53176e-18	35.3382
ENSG00000198018	ENTPD7	57089	Q9NQZ7	ENSG00000198018_ENTPD7	1.21838	5.7425	15.0566	4.11515e-20	1.56376e-18	35.2867
ENSG00000145362	ANK2	287	H0Y933	ENSG00000145362_ANK2	4.02316	0.0630386	15.0473	4.22052e-20	1.60029e-18	35.1992
ENSG00000253250	C8orf88	100127983	P0DMB2	ENSG00000253250_C8orf88	4.20712	1.44235	15.0443	4.25488e-20	1.60979e-18	35.4487
ENSG00000010818	HIVEP2	3097	P31629	ENSG00000010818_HIVEP2	1.30842	6.15892	15.0284	4.44236e-20	1.67342e-18	35.1721
ENSG00000128567	PODXL	5420	G3V0E6	ENSG00000128567_PODXL	-5.32834	2.91423	-15.0203	4.54131e-20	1.70698e-18	35.4688
ENSG00000149257	SERPINH1	871	P50454	ENSG00000149257_SERPINH1	1.20312	7.64266	15.0099	4.67067e-20	1.74828e-18	35.0526
ENSG00000176014	TUBB6	84617	K7EL29	ENSG00000176014_TUBB6	1.13844	8.92284	15.0099	4.67135e-20	1.74828e-18	35.028
ENSG00000065357	DGKA	1606	F8VNZ9	ENSG00000065357_DGKA	1.03916	7.47578	15.0068	4.70972e-20	1.75884e-18	35.044
ENSG00000119686	FLVCR2	55640	Q9UPI3	ENSG00000119686_FLVCR2	-4.80682	-0.020014	-14.9985	4.81721e-20	1.79511e-18	34.9437
ENSG00000171612	SLC25A33	84275	Q9BSK2	ENSG00000171612_SLC25A33	-1.53155	2.70497	-14.9938	4.87965e-20	1.81448e-18	35.4278
ENSG00000105131	EPHX3	79852	Q9H6B9	ENSG00000105131_EPHX3	-5.37049	-0.647378	-14.9693	5.21615e-20	1.93545e-18	34.6245
ENSG00000087128	TMPRSS11E	28983	Q9UL52	ENSG00000087128_TMPRSS11E	-4.14561	3.86007	-14.9524	5.4609e-20	2.02193e-18	35.3069
ENSG00000139668	WDFY2	115825	A0A087WZX3	ENSG00000139668_WDFY2	1.22181	5.38724	14.9482	5.52363e-20	2.03213e-18	35.0251
ENSG00000124067	SLC12A4	6560	Q9UP95	ENSG00000124067_SLC12A4	1.20835	5.96223	14.9486	5.51821e-20	2.03213e-18	34.9688
ENSG00000134827	TCN1	6947	NA	ENSG00000134827_TCN1	-5.99055	5.084	-14.9485	5.51907e-20	2.03213e-18	35.2676
ENSG00000253348	CTC-455F18.1	NA	NA	ENSG00000253348_CTC-455F18.1	-4.56543	-2.32445	-14.9313	5.78479e-20	2.11922e-18	34.1784
ENSG00000144036	EXOC6B	23233	Q9Y2D4	ENSG00000144036_EXOC6B	1.10869	6.26258	14.9223	5.92791e-20	2.16707e-18	34.874
ENSG00000230834	AC068580.7	NA	NA	ENSG00000230834_AC068580.7	-4.73903	-1.94056	-14.8997	6.30364e-20	2.29957e-18	34.194
ENSG00000148680	HTR7	3363	P34969	ENSG00000148680_HTR7	2.97085	3.96683	14.8972	6.34713e-20	2.3019e-18	35.1098
ENSG00000236699	ARHGEF38	54848	Q9NXL2	ENSG00000236699_ARHGEF38	-6.07183	0.0708764	-14.8974	6.34453e-20	2.3019e-18	34.5987
ENSG00000232803	SLCO4A1-AS1	100127888	NA	ENSG00000232803_SLCO4A1-AS1	-5.21575	-2.32614	-14.8962	6.36478e-20	2.30248e-18	34.1593
ENSG00000166347	CYB5A	1528	P00167	ENSG00000166347_CYB5A	-1.40767	5.48731	-14.8897	6.47829e-20	2.33866e-18	34.878
ENSG00000186517	ARHGAP30	257106	NA	ENSG00000186517_ARHGAP30	-4.17061	-0.452947	-14.8821	6.6145e-20	2.38287e-18	34.667
ENSG00000067992	PDK3	5165	Q15120	ENSG00000067992_PDK3	-2.84697	3.35216	-14.8678	6.8778e-20	2.47258e-18	35.0664
ENSG00000196187	TMEM63A	9725	O94886	ENSG00000196187_TMEM63A	-1.72119	6.0623	-14.8601	7.0243e-20	2.52002e-18	34.7358
ENSG00000178685	PARP10	84875	NA	ENSG00000178685_PARP10	-1.17985	4.19697	-14.8478	7.2652e-20	2.60106e-18	34.9015
ENSG00000131746	TNS4	84951	NA	ENSG00000131746_TNS4	1.96184	9.59162	14.8397	7.42811e-20	2.6539e-18	34.5562
ENSG00000168807	SNTB2	6645	Q13425	ENSG00000168807_SNTB2	1.32567	5.78659	14.8203	7.83295e-20	2.79278e-18	34.6292
ENSG00000099282	TSPAN15	23555	O95858	ENSG00000099282_TSPAN15	-3.54786	2.51223	-14.8105	8.04622e-20	2.85123e-18	34.9259
ENSG00000223829	AC004870.4	NA	NA	ENSG00000223829_AC004870.4	-4.56234	-2.69133	-14.8106	8.0435e-20	2.85123e-18	33.8335
ENSG00000175600	SUGCT	79783	Q9HAC7	ENSG00000175600_SUGCT	2.79391	2.65634	14.7987	8.30923e-20	2.93592e-18	34.9002
ENSG00000165138	ANKS6	203286	H7C163	ENSG00000165138_ANKS6	2.19668	4.05295	14.7983	8.31913e-20	2.93592e-18	34.7887
ENSG00000135047	CTSL	1514	P07711	ENSG00000135047_CTSL	1.38847	5.8799	14.7973	8.34142e-20	2.93781e-18	34.565
ENSG00000160862	AZGP1	563	NA	ENSG00000160862_AZGP1	-6.87297	4.18107	-14.7766	8.82872e-20	3.10312e-18	34.8406
ENSG00000177666	PNPLA2	57104	Q96AD5	ENSG00000177666_PNPLA2	-1.41897	5.41731	-14.7703	8.9831e-20	3.151e-18	34.5353
ENSG00000141497	ZMYND15	84225	Q9H091	ENSG00000141497_ZMYND15	-3.26097	0.320267	-14.7593	9.25822e-20	3.24094e-18	34.5251
ENSG00000243364	EFNA4	1945	P52798	ENSG00000243364_EFNA4	-1.26403	3.40674	-14.7423	9.69923e-20	3.38847e-18	34.6998
ENSG00000187244	BCAM	4059	A0A087WXM8	ENSG00000187244_BCAM	2.78932	6.44263	14.7251	1.0171e-19	3.54613e-18	34.3576
ENSG00000256268	RP11-221N13.3	NA	NA	ENSG00000256268_RP11-221N13.3	2.54837	0.491645	14.6654	1.19847e-19	4.1701e-18	34.3885
ENSG00000085831	TTC39A	22996	Q5SRH9	ENSG00000085831_TTC39A	-4.0643	0.675532	-14.6606	1.21461e-19	4.21778e-18	34.2804
ENSG00000230453	ANKRD18B	441459	A2A2Z9	ENSG00000230453_ANKRD18B	3.7619	0.473459	14.657	1.22662e-19	4.25097e-18	34.3458
ENSG00000120055	C10orf95	79946	NA	ENSG00000120055_C10orf95	-1.59552	1.29197	-14.6404	1.28412e-19	4.44137e-18	34.4297
ENSG00000154065	ANKRD29	147463	Q8N6D5	ENSG00000154065_ANKRD29	2.93013	2.41421	14.6366	1.29783e-19	4.47984e-18	34.4579
ENSG00000136161	RCBTB2	1102	O95199	ENSG00000136161_RCBTB2	1.37121	3.05404	14.5999	1.43593e-19	4.91734e-18	34.3205
ENSG00000128512	DOCK4	9732	H0Y7H7	ENSG00000128512_DOCK4	2.81232	4.3106	14.5982	1.44277e-19	4.93102e-18	34.2422
ENSG00000183337	BCOR	54880	H7C2V9	ENSG00000183337_BCOR	1.15754	3.86606	14.5959	1.45211e-19	4.95318e-18	34.2338
ENSG00000113494	PRLR	5618	P16471	ENSG00000113494_PRLR	-6.34185	-0.927339	-14.5879	1.48471e-19	5.05443e-18	33.6108
ENSG00000272825	LL21NC02-1C16.2	NA	NA	ENSG00000272825_LL21NC02-1C16.2	-5.13635	-0.465606	-14.586	1.4923e-19	5.07031e-18	33.7641
ENSG00000176842	IRX5	10265	P78411	ENSG00000176842_IRX5	-1.45611	5.4748	-14.5812	1.51214e-19	5.12765e-18	34.0024
ENSG00000166681	BEX3	27018	Q00994	ENSG00000166681_BEX3	1.33616	5.62384	14.5773	1.52858e-19	5.15317e-18	33.9912
ENSG00000183255	PTTG1IP	754	A8MZH8	ENSG00000183255_PTTG1IP	-1.58176	8.58051	-14.5786	1.5231e-19	5.15317e-18	33.8447
ENSG00000107249	GLIS3	169792	Q8NEA6	ENSG00000107249_GLIS3	-3.40315	3.38208	-14.5775	1.528e-19	5.15317e-18	34.2931
ENSG00000157227	MMP14	4323	P50281	ENSG00000157227_MMP14	1.47287	8.90975	14.5669	1.57314e-19	5.29308e-18	33.8037
ENSG00000106537	TSPAN13	27075	O95857	ENSG00000106537_TSPAN13	-1.18829	5.74187	-14.5474	1.66063e-19	5.57663e-18	33.8832
ENSG00000173918	C1QTNF1	114897	A0A0C4DFP7	ENSG00000173918_C1QTNF1	-2.51726	5.47263	-14.5434	1.67929e-19	5.6284e-18	33.9721
ENSG00000260822	GS1-358P8.4	NA	NA	ENSG00000260822_GS1-358P8.4	-3.09949	3.13518	-14.523	1.77699e-19	5.93288e-18	34.1277
ENSG00000213903	LTB4R	1241	G3V244	ENSG00000213903_LTB4R	2.64205	4.4701	14.5189	1.79698e-19	5.98809e-18	33.9458
ENSG00000141527	CARD14	79092	I3L4Q8	ENSG00000141527_CARD14	-3.96696	0.856581	-14.5132	1.82569e-19	6.07207e-18	33.9489
ENSG00000169282	KCNAB1	7881	NA	ENSG00000169282_KCNAB1	-4.73011	-1.53876	-14.504	1.87294e-19	6.2173e-18	33.4135
ENSG00000172461	FUT9	10690	NA	ENSG00000172461_FUT9	-7.11149	-0.992463	-14.4968	1.91081e-19	6.33089e-18	33.2467
ENSG00000137843	PAK6	106821730	H0YM99	ENSG00000137843_PAK6	1.28407	3.65399	14.495	1.9204e-19	6.35052e-18	33.9581
ENSG00000159423	ALDH4A1	8659	P30038	ENSG00000159423_ALDH4A1	1.52864	4.20072	14.4738	2.03679e-19	6.72256e-18	33.8803
ENSG00000082458	DLG3	1741	Q5JUW8	ENSG00000082458_DLG3	-1.07719	5.53789	-14.4653	2.08562e-19	6.87066e-18	33.6867
ENSG00000196083	IL1RAP	3556	Q9NPH3	ENSG00000196083_IL1RAP	1.4137	7.34188	14.4612	2.10965e-19	6.93235e-18	33.5346
ENSG00000123143	PKN1	5585	K7EPK3	ENSG00000123143_PKN1	-2.7944	4.55685	-14.4607	2.11235e-19	6.93235e-18	33.8608
ENSG00000136531	SCN2A	6326	NA	ENSG00000136531_SCN2A	4.8051	1.00079	14.455	2.14588e-19	7.02909e-18	33.7123
ENSG00000111817	DSE	29940	X6REM1	ENSG00000111817_DSE	1.10565	7.33764	14.4514	2.16755e-19	7.08667e-18	33.5079
ENSG00000163347	CLDN1	9076	O95832	ENSG00000163347_CLDN1	-3.80952	5.18068	-14.4217	2.35444e-19	7.68319e-18	33.6828
ENSG00000241839	PLEKHO2	80301	Q8TD55	ENSG00000241839_PLEKHO2	1.71809	2.6812	14.4149	2.39932e-19	7.81491e-18	33.8384
ENSG00000103089	FA2H	79152	NA	ENSG00000103089_FA2H	-4.43859	-0.034605	-14.401	2.49405e-19	8.07793e-18	33.4655
ENSG00000106266	SNX8	102465503	Q9Y5X2	ENSG00000106266_SNX8	-1.34812	4.57036	-14.3939	2.54426e-19	8.22518e-18	33.5884
ENSG00000182272	B4GALNT4	338707	NA	ENSG00000182272_B4GALNT4	-3.19936	3.59446	-14.3883	2.58455e-19	8.33988e-18	33.7588
ENSG00000174567	GOLT1A	127845	Q6ZVE7	ENSG00000174567_GOLT1A	-4.39123	-0.895797	-14.3855	2.60424e-19	8.38778e-18	33.1908
ENSG00000136854	STXBP1	6812	NA	ENSG00000136854_STXBP1	1.05439	5.85751	14.3814	2.63415e-19	8.46837e-18	33.4009
ENSG00000204323	SMIM5	643008	Q71RC9	ENSG00000204323_SMIM5	-5.40613	-1.79279	-14.3798	2.64633e-19	8.49178e-18	32.8807
ENSG00000139083	ETV6	2120	P41212	ENSG00000139083_ETV6	-1.11228	6.40521	-14.3615	2.78518e-19	8.92081e-18	33.3078
ENSG00000164171	ITGA2	3673	P17301	ENSG00000164171_ITGA2	1.84511	8.29371	14.3541	2.84332e-19	9.09023e-18	33.2142
ENSG00000259070	LINC00639	283547	NA	ENSG00000259070_LINC00639	-6.23593	0.597523	-14.3509	2.86885e-19	9.15495e-18	33.1901
ENSG00000131620	ANO1	55107	Q5XXA6	ENSG00000131620_ANO1	3.02719	6.32257	14.3425	2.93687e-19	9.3548e-18	33.2867
ENSG00000074964	ARHGEF10L	55160	Q9HCE6	ENSG00000074964_ARHGEF10L	-3.68895	3.13171	-14.3335	3.01118e-19	9.5739e-18	33.6208
ENSG00000013016	EHD3	30845	Q9NZN3	ENSG00000013016_EHD3	2.62575	4.85384	14.3242	3.09097e-19	9.79166e-18	33.4315
ENSG00000149177	PTPRJ	5795	Q12913	ENSG00000149177_PTPRJ	-3.16937	3.22458	-14.3246	3.08749e-19	9.79166e-18	33.5933
ENSG00000141424	SLC39A6	25800	Q13433	ENSG00000141424_SLC39A6	1.12291	8.14913	14.3206	3.12264e-19	9.87392e-18	33.119
ENSG00000178750	STX19	415117	Q8N4C7	ENSG00000178750_STX19	-5.24734	-1.46446	-14.3186	3.14016e-19	9.91124e-18	32.8813
ENSG00000117407	ARTN	9048	Q5T4W7	ENSG00000117407_ARTN	2.19403	4.48138	14.3077	3.23736e-19	1.01995e-17	33.3725
ENSG00000118971	CCND2	894	P30279	ENSG00000118971_CCND2	3.71264	7.63012	14.2996	3.3115e-19	1.03952e-17	33.1073
ENSG00000142227	EMP3	2014	M0QZ66	ENSG00000142227_EMP3	2.01951	4.85051	14.2907	3.39468e-19	1.06371e-17	33.2828
ENSG00000164465	DCBLD1	285761	NA	ENSG00000164465_DCBLD1	-1.8491	7.59259	-14.2875	3.42547e-19	1.07142e-17	33.0531
ENSG00000065675	PRKCQ	5588	Q04759	ENSG00000065675_PRKCQ	3.63496	2.75629	14.285	3.44972e-19	1.07706e-17	33.4903
ENSG00000091436	AC013461.1	51776	Q9NYL2	ENSG00000091436_AC013461.1	1.49334	7.70345	14.2682	3.61578e-19	1.12485e-17	32.9791
ENSG00000184584	TMEM173	340061	NA	ENSG00000184584_TMEM173	1.9709	4.18732	14.2533	3.77013e-19	1.17077e-17	33.2601
ENSG00000160190	SLC37A1	54020	NA	ENSG00000160190_SLC37A1	-1.46146	4.46666	-14.2493	3.8128e-19	1.1819e-17	33.2007
ENSG00000003249	DBNDD1	79007	Q9H9R9	ENSG00000003249_DBNDD1	-3.80795	3.52209	-14.2452	3.85689e-19	1.19343e-17	33.3719
ENSG00000175906	ARL4D	379	P49703	ENSG00000175906_ARL4D	1.58574	4.57895	14.241	3.90268e-19	1.20545e-17	33.1455
ENSG00000165591	FAAH2	158584	Q6GMR7	ENSG00000165591_FAAH2	-3.06804	-0.0518576	-14.2267	4.06289e-19	1.2527e-17	33.0719
ENSG00000163590	PPM1L	151742	Q5SGD2	ENSG00000163590_PPM1L	-2.83091	2.89243	-14.207	4.29413e-19	1.32165e-17	33.2667
ENSG00000156675	RAB11FIP1	80223	Q6WKZ4	ENSG00000156675_RAB11FIP1	-2.16397	6.42387	-14.1915	4.48552e-19	1.37081e-17	32.8637
ENSG00000129235	TXNDC17	84817	Q9BRA2	ENSG00000129235_TXNDC17	1.1708	6.99164	14.1893	4.51216e-19	1.37653e-17	32.7805
ENSG00000011198	ABHD5	51099	C9JBM3	ENSG00000011198_ABHD5	-1.29838	5.44331	-14.1861	4.55347e-19	1.38669e-17	32.8982
ENSG00000198355	PIM3	415116	Q86V86	ENSG00000198355_PIM3	-1.51453	5.96075	-14.185	4.56735e-19	1.38847e-17	32.8311
ENSG00000177694	NAALADL2	254827	NA	ENSG00000177694_NAALADL2	-5.10758	1.92871	-14.1817	4.61077e-19	1.39922e-17	33.1084
ENSG00000133639	BTG1	694	P62324	ENSG00000133639_BTG1	-2.13145	7.60403	-14.1741	4.71055e-19	1.427e-17	32.7288
ENSG00000161955	TNFSF13	8741	K7EJ28	ENSG00000161955_TNFSF13	-2.13818	2.17801	-14.1734	4.71891e-19	1.42704e-17	33.1801
ENSG00000123094	RASSF8	11228	Q8NHQ8	ENSG00000123094_RASSF8	1.53201	5.46606	14.1643	4.84147e-19	1.46155e-17	32.8333
ENSG00000170873	MTSS1	9788	O43312	ENSG00000170873_MTSS1	4.13052	4.14387	14.1629	4.86025e-19	1.46467e-17	33.075
ENSG00000150782	IL18	3606	Q14116	ENSG00000150782_IL18	-3.34356	4.11586	-14.1619	4.87453e-19	1.46642e-17	33.0572
ENSG00000164796	CSMD3	114788	Q7Z407	ENSG00000164796_CSMD3	3.21482	0.902737	14.1575	4.93576e-19	1.48227e-17	33.0456
ENSG00000183876	ARSI	340075	Q5FYB1	ENSG00000183876_ARSI	3.97843	4.24911	14.1535	4.99172e-19	1.49451e-17	33.0631
ENSG00000134955	SLC37A2	219855	Q8TED4	ENSG00000134955_SLC37A2	1.79971	4.88723	14.1521	5.01098e-19	1.49707e-17	32.859
ENSG00000175315	CST6	1474	Q15828	ENSG00000175315_CST6	-5.67034	3.08402	-14.1513	5.02286e-19	1.49804e-17	33.0926
ENSG00000171812	COL8A2	1296	P25067	ENSG00000171812_COL8A2	2.83452	2.3528	14.1459	5.09906e-19	1.51815e-17	33.1033
ENSG00000183347	GBP6	163351	Q6ZN66	ENSG00000183347_GBP6	3.6064	3.03727	14.1265	5.38566e-19	1.59799e-17	33.0398
ENSG00000068366	ACSL4	2182	NA	ENSG00000068366_ACSL4	1.20672	7.45511	14.1218	5.45846e-19	1.61682e-17	32.5685
ENSG00000145040	UCN2	90226	Q96RP3	ENSG00000145040_UCN2	3.11283	1.71904	14.1185	5.50839e-19	1.62883e-17	33.0118
ENSG00000177508	IRX3	79191	P78415	ENSG00000177508_IRX3	-1.62908	5.43376	-14.1152	5.56004e-19	1.63851e-17	32.7042
ENSG00000110080	ST3GAL4	6484	E9PKJ2	ENSG00000110080_ST3GAL4	-1.77897	6.02871	-14.1155	5.55529e-19	1.63851e-17	32.6671
ENSG00000019144	PHLDB1	102466719	NA	ENSG00000019144_PHLDB1	1.90429	5.86226	14.1071	5.68929e-19	1.67092e-17	32.6504
ENSG00000128881	TTBK2	146057	Q6IQ55	ENSG00000128881_TTBK2	1.4401	4.56995	14.1072	5.68818e-19	1.67092e-17	32.7756
ENSG00000182197	EXT1	2131	Q16394	ENSG00000182197_EXT1	1.04529	7.25013	14.1061	5.70605e-19	1.673e-17	32.535
ENSG00000137709	POU2F3	25833	Q9UKI9	ENSG00000137709_POU2F3	-3.43717	0.18812	-14.1038	5.74328e-19	1.68107e-17	32.7274
ENSG00000110934	BIN2	51411	S4R418	ENSG00000110934_BIN2	-3.8278	-3.0397	-14.1019	5.77276e-19	1.68685e-17	31.8994
ENSG00000064547	LPAR2	9170	Q9HBW0	ENSG00000064547_LPAR2	-1.05505	4.47272	-14.101	5.78846e-19	1.68859e-17	32.7761
ENSG00000169026	MFSD7	84179	NA	ENSG00000169026_MFSD7	-3.52637	0.638031	-14.0983	5.8327e-19	1.69864e-17	32.8
ENSG00000072954	TMEM38A	79041	Q9H6F2	ENSG00000072954_TMEM38A	-2.44208	2.31058	-14.0942	5.9007e-19	1.71556e-17	32.9584
ENSG00000106366	SERPINE1	5054	P05121	ENSG00000106366_SERPINE1	3.64462	7.66318	14.093	5.92011e-19	1.71832e-17	32.5321
ENSG00000054598	FOXC1	2296	Q12948	ENSG00000054598_FOXC1	-1.95178	6.21889	-14.0841	6.07198e-19	1.75945e-17	32.5592
ENSG00000108244	KRT23	25984	Q9C075	ENSG00000108244_KRT23	-5.42255	5.11924	-14.0421	6.83677e-19	1.97776e-17	32.7445
ENSG00000185436	IFNLR1	163702	Q8IU57	ENSG00000185436_IFNLR1	1.60374	3.39648	14.0378	6.91996e-19	1.99848e-17	32.7277
ENSG00000076685	NT5C2	22978	P49902	ENSG00000076685_NT5C2	-1.03686	6.76527	-14.0341	6.99282e-19	2.01616e-17	32.3537
ENSG00000221926	TRIM16	10626	O95361	ENSG00000221926_TRIM16	-1.69083	4.87032	-14.018	7.32031e-19	2.10359e-17	32.5083
ENSG00000229852	RP11-398K22.12	NA	NA	ENSG00000229852_RP11-398K22.12	2.72621	1.43219	14.0161	7.36029e-19	2.11158e-17	32.7144
ENSG00000148346	LCN2	3934	P80188	ENSG00000148346_LCN2	-6.02408	4.98359	-14.0112	7.46293e-19	2.13748e-17	32.6433
ENSG00000114812	VIPR1	7433	P32241	ENSG00000114812_VIPR1	-4.14928	1.71062	-14.0007	7.68889e-19	2.19857e-17	32.6461
ENSG00000005249	PRKAR2B	5577	P31323	ENSG00000005249_PRKAR2B	-6.19173	1.89538	-13.9902	7.92158e-19	2.26137e-17	32.4217
ENSG00000156113	KCNMA1	3778	S4R2X4	ENSG00000156113_KCNMA1	5.34557	2.46429	13.9892	7.94293e-19	2.26374e-17	32.6362
ENSG00000272734	ADIRF-AS1	NA	NA	ENSG00000272734_ADIRF-AS1	1.81036	2.9728	13.9768	8.22838e-19	2.34124e-17	32.5724
ENSG00000154556	SORBS2	8470	O94875	ENSG00000154556_SORBS2	-5.30052	3.32189	-13.9563	8.72047e-19	2.47718e-17	32.5701
ENSG00000024422	EHD2	30846	Q9NZN4	ENSG00000024422_EHD2	1.11606	8.1451	13.9538	8.78406e-19	2.49117e-17	32.0712
ENSG00000105523	FAM83E	54854	Q2M2I3	ENSG00000105523_FAM83E	-4.38881	0.0425397	-13.9493	8.89691e-19	2.51905e-17	32.2513
ENSG00000166268	MYRFL	196446	Q96LU7	ENSG00000166268_MYRFL	-4.04862	-1.75266	-13.937	9.21227e-19	2.60408e-17	31.9087
ENSG00000122971	ACADS	35	P16219	ENSG00000122971_ACADS	-1.46547	2.26594	-13.932	9.34515e-19	2.63734e-17	32.5011
ENSG00000248362	CTC-327F10.5	NA	NA	ENSG00000248362_CTC-327F10.5	-3.43272	-3.08773	-13.9297	9.40693e-19	2.65046e-17	31.5735
ENSG00000188277	C15orf62	643338	A8K5M9	ENSG00000188277_C15orf62	-5.02524	0.214099	-13.927	9.47941e-19	2.66655e-17	32.1471
ENSG00000116396	KCNC4	3749	NA	ENSG00000116396_KCNC4	-1.41133	4.23283	-13.9257	9.51291e-19	2.67163e-17	32.3237
ENSG00000155254	MARVELD1	83742	NA	ENSG00000155254_MARVELD1	1.31408	6.86015	13.9133	9.85526e-19	2.7633e-17	31.9963
ENSG00000198719	DLL1	28514	O00548	ENSG00000198719_DLL1	2.9228	3.66274	13.8994	1.02537e-18	2.87037e-17	32.3342
ENSG00000196576	PLXNB2	23654	NA	ENSG00000196576_PLXNB2	-1.01981	8.93049	-13.8949	1.0387e-18	2.90301e-17	31.8924
ENSG00000166402	TUB	7275	E9PQR4	ENSG00000166402_TUB	3.59727	1.41865	13.8925	1.04578e-18	2.91808e-17	32.3082
ENSG00000151150	ANK3	288	Q12955	ENSG00000151150_ANK3	-1.9926	5.91257	-13.8723	1.1078e-18	3.08121e-17	31.9883
ENSG00000125257	ABCC4	10257	O15439	ENSG00000125257_ABCC4	1.78577	4.4684	13.8708	1.11254e-18	3.08943e-17	32.1414
ENSG00000145730	PAM	5066	D6RF09	ENSG00000145730_PAM	-1.24956	8.39324	-13.8529	1.17072e-18	3.24579e-17	31.7813
ENSG00000166689	PLEKHA7	144100	NA	ENSG00000166689_PLEKHA7	-2.65062	4.83507	-13.8522	1.17303e-18	3.247e-17	32.0772
ENSG00000140022	STON2	85439	Q8WXE9	ENSG00000140022_STON2	1.60183	5.39452	13.8515	1.17542e-18	3.24844e-17	31.9358
ENSG00000077454	LRCH4	4034	H7C5D9	ENSG00000077454_LRCH4	-1.0925	5.24436	-13.8443	1.19981e-18	3.31057e-17	31.9334
ENSG00000127990	SGCE	8910	H0YC75	ENSG00000127990_SGCE	1.43235	5.30483	13.8147	1.30582e-18	3.58593e-17	31.8937
ENSG00000140945	CDH13	1012	P55290	ENSG00000140945_CDH13	2.39432	5.97702	13.7976	1.37121e-18	3.75954e-17	31.745
ENSG00000060982	BCAT1	586	P54687	ENSG00000060982_BCAT1	3.53455	5.00756	13.7839	1.42603e-18	3.90228e-17	31.9293
ENSG00000100284	TOM1	10043	V9GYF4	ENSG00000100284_TOM1	-1.303	4.34745	-13.7835	1.42777e-18	3.90228e-17	31.8926
ENSG00000076356	PLXNA2	5362	O75051	ENSG00000076356_PLXNA2	2.00399	5.60676	13.7636	1.51137e-18	4.11131e-17	31.6769
ENSG00000135116	HRK	8739	O00198	ENSG00000135116_HRK	-4.62804	0.763762	-13.7622	1.51778e-18	4.11582e-17	31.7913
ENSG00000090382	LYZ	4069	P61626	ENSG00000090382_LYZ	-5.37678	-2.40867	-13.7624	1.51691e-18	4.11582e-17	31.1852
ENSG00000117385	P3H1	64175	NA	ENSG00000117385_P3H1	1.07153	5.21901	13.7553	1.54794e-18	4.19106e-17	31.6958
ENSG00000151376	ME3	10873	Q16798	ENSG00000151376_ME3	-1.53374	3.26568	-13.7402	1.61616e-18	4.36212e-17	31.8866
ENSG00000125845	BMP2	650	P12643	ENSG00000125845_BMP2	3.23467	3.74147	13.7393	1.62036e-18	4.36664e-17	31.91
ENSG00000213937	CLDN9	9080	O95484	ENSG00000213937_CLDN9	-4.74951	-2.49504	-13.7347	1.64231e-18	4.41893e-17	31.0888
ENSG00000239713	APOBEC3G	60489	Q9HC16	ENSG00000239713_APOBEC3G	3.31288	3.42017	13.7263	1.68204e-18	4.51882e-17	31.8865
ENSG00000100344	PNPLA3	80339	Q9NST1	ENSG00000100344_PNPLA3	-3.30592	3.64416	-13.724	1.69354e-18	4.54267e-17	31.8867
ENSG00000132470	ITGB4	3691	P16144	ENSG00000132470_ITGB4	1.45735	11.0233	13.7207	1.70953e-18	4.57847e-17	31.3846
ENSG00000198429	ZNF69	7620	Q9UC07	ENSG00000198429_ZNF69	-2.8389	1.36552	-13.7182	1.72182e-18	4.60427e-17	31.8292
ENSG00000158089	GALNT14	79623	Q96FL9	ENSG00000158089_GALNT14	1.36949	5.26654	13.7173	1.72601e-18	4.60836e-17	31.5693
ENSG00000102452	NALCN	259232	Q8IZF0	ENSG00000102452_NALCN	-3.43669	1.56867	-13.7142	1.74143e-18	4.64237e-17	31.8405
ENSG00000145103	ILDR1	286676	Q86SU0	ENSG00000145103_ILDR1	-4.06856	0.475563	-13.7096	1.76505e-18	4.69812e-17	31.6466
ENSG00000160345	C9orf116	138162	Q5BN46	ENSG00000160345_C9orf116	-2.19385	1.04864	-13.7089	1.76845e-18	4.69996e-17	31.8181
ENSG00000083857	FAT1	2195	Q14517	ENSG00000083857_FAT1	1.38579	10.3851	13.7077	1.77423e-18	4.7081e-17	31.3451
ENSG00000137266	SLC22A23	63027	C9J4Z0	ENSG00000137266_SLC22A23	2.43928	5.27471	13.687	1.88343e-18	4.9826e-17	31.5202
ENSG00000135605	TEC	7006	P42680	ENSG00000135605_TEC	-2.38414	1.1757	-13.6838	1.90066e-18	5.02054e-17	31.765
ENSG00000176845	METRNL	284207	Q641Q3	ENSG00000176845_METRNL	-3.20301	2.07774	-13.6826	1.9073e-18	5.0304e-17	31.7884
ENSG00000108479	GALK1	2584	P51570	ENSG00000108479_GALK1	-2.16852	2.39515	-13.6746	1.95163e-18	5.13168e-17	31.7695
ENSG00000142197	DOPEY2	9980	F8W8U9	ENSG00000142197_DOPEY2	-1.20798	5.02298	-13.6681	1.98846e-18	5.22061e-17	31.4655
ENSG00000117069	ST6GALNAC5	81849	Q9BVH7	ENSG00000117069_ST6GALNAC5	-3.70962	2.43671	-13.6626	2.01995e-18	5.29527e-17	31.7406
ENSG00000185467	KPNA7	402569	A9QM74	ENSG00000185467_KPNA7	-3.61378	-1.99885	-13.6583	2.04531e-18	5.35365e-17	31.0334
ENSG00000148341	SH3GLB2	56904	Q9NR46	ENSG00000148341_SH3GLB2	-1.03429	5.99597	-13.6573	2.05112e-18	5.36076e-17	31.3156
ENSG00000156284	CLDN8	9073	P56748	ENSG00000156284_CLDN8	-6.80915	1.77073	-13.6301	2.21848e-18	5.78943e-17	31.4621
ENSG00000214063	TSPAN4	7106	O14817	ENSG00000214063_TSPAN4	1.63305	4.49669	13.6244	2.25499e-18	5.87587e-17	31.3948
ENSG00000204262	COL5A2	1290	P05997	ENSG00000204262_COL5A2	3.97131	5.40265	13.5992	2.42536e-18	6.30084e-17	31.3668
ENSG00000172164	SNTB1	6641	Q13884	ENSG00000172164_SNTB1	-6.43316	0.696647	-13.5771	2.58508e-18	6.70573e-17	31.2269
ENSG00000188906	LRRK2	120892	C9JBF0	ENSG00000188906_LRRK2	3.38768	0.467997	13.5656	2.6721e-18	6.92109e-17	31.3946
ENSG00000187678	SPRY4	81848	A0A0C4DFS6	ENSG00000187678_SPRY4	1.95634	4.7901	13.5647	2.67947e-18	6.92983e-17	31.2098
ENSG00000272282	RP11-222K16.2	NA	NA	ENSG00000272282_RP11-222K16.2	4.04206	-1.42809	13.5612	2.70655e-18	6.97903e-17	30.9635
ENSG00000010295	IFFO1	25900	NA	ENSG00000010295_IFFO1	3.8369	-0.0535083	13.5613	2.7056e-18	6.97903e-17	31.2229
ENSG00000204839	MROH6	642475	A6NGR9	ENSG00000204839_MROH6	-2.11806	4.51227	-13.5545	2.75939e-18	7.09416e-17	31.2004
ENSG00000188732	FAM221A	340277	A4D161	ENSG00000188732_FAM221A	-3.10849	0.537847	-13.5294	2.96726e-18	7.60603e-17	31.2595
ENSG00000105963	ADAP1	11033	O75689	ENSG00000105963_ADAP1	-1.85638	2.42112	-13.5232	3.02097e-18	7.73225e-17	31.3252
ENSG00000169087	HSPBAP1	79663	NA	ENSG00000169087_HSPBAP1	1.22182	2.72956	13.521	3.04067e-18	7.77119e-17	31.2941
ENSG00000265485	RP11-449D8.1	729950	NA	ENSG00000265485_RP11-449D8.1	-3.06667	-3.75929	-13.5199	3.05016e-18	7.78396e-17	30.2287
ENSG00000006468	ETV1	2115	P50549	ENSG00000006468_ETV1	2.75479	3.09933	13.5018	3.21416e-18	8.1784e-17	31.2457
ENSG00000166250	CLMP	79827	Q9H6B4	ENSG00000166250_CLMP	1.85101	6.70132	13.4824	3.40022e-18	8.63916e-17	30.7614
ENSG00000160796	NBEAL2	23218	Q6ZNJ1	ENSG00000160796_NBEAL2	-1.20242	6.95179	-13.4778	3.44564e-18	8.74173e-17	30.7213
ENSG00000115648	MLPH	79083	C9JKV5	ENSG00000115648_MLPH	-4.92718	3.82457	-13.4731	3.4935e-18	8.8502e-17	31.1914
ENSG00000180660	MAB21L1	4081	Q13394	ENSG00000180660_MAB21L1	5.08536	1.31523	13.4715	3.50952e-18	8.87781e-17	31.062
ENSG00000114861	FOXP1	27086	Q9H334	ENSG00000114861_FOXP1	1.11034	6.56261	13.4676	3.54998e-18	8.95401e-17	30.7078
ENSG00000181392	SYNE4	163183	NA	ENSG00000181392_SYNE4	-2.63021	2.07167	-13.4677	3.54887e-18	8.95401e-17	31.1819
ENSG00000126947	ARMCX1	51309	Q9P291	ENSG00000126947_ARMCX1	1.29683	4.13276	13.4657	3.56969e-18	8.99065e-17	31.0004
ENSG00000110888	CAPRIN2	65981	H0YGG3	ENSG00000110888_CAPRIN2	1.99202	4.57161	13.4509	3.72589e-18	9.37042e-17	30.8798
ENSG00000172575	RASGRP1	10125	O95267	ENSG00000172575_RASGRP1	-5.57303	-1.69639	-13.4405	3.83978e-18	9.64287e-17	30.4706
ENSG00000187800	PEAR1	375033	F2Z2F7	ENSG00000187800_PEAR1	3.04327	1.08029	13.4387	3.86053e-18	9.68093e-17	31.0821
ENSG00000102362	SYTL4	94121	Q96C24	ENSG00000102362_SYTL4	-2.25575	3.12265	-13.4376	3.87307e-18	9.69834e-17	31.0459
ENSG00000196396	PTPN1	5770	P18031	ENSG00000196396_PTPN1	1.16152	7.16505	13.4311	3.94702e-18	9.86925e-17	30.5792
ENSG00000104312	RIPK2	8767	O43353	ENSG00000104312_RIPK2	-1.01368	5.72866	-13.4259	4.007e-18	9.99039e-17	30.6715
ENSG00000166391	MOGAT2	80168	Q3SYC2	ENSG00000166391_MOGAT2	-5.37515	-2.55608	-13.4259	4.00696e-18	9.99039e-17	30.2486
ENSG00000123146	ADGRE5	976	NA	ENSG00000123146_ADGRE5	-1.54599	5.5088	-13.4054	4.25277e-18	1.05727e-16	30.649
ENSG00000178695	KCTD12	115207	Q96CX2	ENSG00000178695_KCTD12	1.65855	6.89516	13.4018	4.29794e-18	1.06697e-16	30.515
ENSG00000234961	RP11-124N14.3	NA	NA	ENSG00000234961_RP11-124N14.3	3.28454	1.0121	13.3924	4.41673e-18	1.09489e-16	30.8652
ENSG00000110987	BCL7A	605	Q4VC05	ENSG00000110987_BCL7A	1.08594	5.533	13.3881	4.47331e-18	1.10734e-16	30.5845
ENSG00000174500	GCSAM	257144	Q8N6F7	ENSG00000174500_GCSAM	3.89683	-0.296872	13.3772	4.61669e-18	1.13634e-16	30.6961
ENSG00000147854	UHRF2	115426	Q96PU4	ENSG00000147854_UHRF2	1.00976	6.04904	13.3772	4.61641e-18	1.13634e-16	30.4818
ENSG00000183580	FBXL7	23194	Q9UJT9	ENSG00000183580_FBXL7	4.85857	-1.61387	13.3721	4.68612e-18	1.15016e-16	30.3545
ENSG00000112379	ARFGEF3	57221	Q5TH69	ENSG00000112379_ARFGEF3	-2.65304	5.42561	-13.3576	4.88888e-18	1.19653e-16	30.5665
ENSG00000165929	TC2N	123036	Q8N9U0	ENSG00000165929_TC2N	-1.3239	5.83031	-13.3567	4.90126e-18	1.19686e-16	30.4506
ENSG00000141854	MISP3	102466515	Q96FF7	ENSG00000141854_MISP3	-2.98275	0.741355	-13.354	4.94034e-18	1.20233e-16	30.7452
ENSG00000072864	NDE1	619553	Q9NXR1	ENSG00000072864_NDE1	1.1938	5.84271	13.3505	4.99004e-18	1.21273e-16	30.437
ENSG00000213047	DENND1B	163486	X6RAS2	ENSG00000213047_DENND1B	-1.1034	4.57404	-13.3487	5.01751e-18	1.21599e-16	30.559
ENSG00000147251	DOCK11	139818	A6NIW2	ENSG00000147251_DOCK11	4.66143	2.29214	13.3471	5.04002e-18	1.21974e-16	30.836
ENSG00000108797	CNTNAP1	8506	P78357	ENSG00000108797_CNTNAP1	2.72004	1.87206	13.3284	5.32321e-18	1.28648e-16	30.7805
ENSG00000034239	EFCAB1	79645	NA	ENSG00000034239_EFCAB1	4.22605	-0.876089	13.3153	5.5304e-18	1.33469e-16	30.3977
ENSG00000111490	TBC1D30	23329	NA	ENSG00000111490_TBC1D30	-2.73392	2.07931	-13.299	5.80055e-18	1.39406e-16	30.6928
ENSG00000138190	EXOC6	54536	B1AP46	ENSG00000138190_EXOC6	-1.6059	4.19904	-13.2959	5.85369e-18	1.40489e-16	30.5019
ENSG00000151715	TMEM45B	120224	Q96B21	ENSG00000151715_TMEM45B	-3.35905	3.81679	-13.2899	5.95641e-18	1.42756e-16	30.5663
ENSG00000179913	B3GNT3	10331	M0R199	ENSG00000179913_B3GNT3	-1.14436	5.46595	-13.2747	6.22762e-18	1.4905e-16	30.2365
ENSG00000107281	NPDC1	56654	Q5SPY9	ENSG00000107281_NPDC1	-1.38579	5.66273	-13.272	6.2781e-18	1.50051e-16	30.2129
ENSG00000131873	CHSY1	22856	Q86X52	ENSG00000131873_CHSY1	1.13801	6.89435	13.2703	6.30975e-18	1.506e-16	30.1224
ENSG00000103489	XYLT1	64131	Q86Y38	ENSG00000103489_XYLT1	4.15372	4.53878	13.2546	6.60613e-18	1.57457e-16	30.4485
ENSG00000181826	RELL1	768211	Q8IUW5	ENSG00000181826_RELL1	1.45899	2.95113	13.2408	6.87829e-18	1.63718e-16	30.458
ENSG00000165914	TTC7B	145567	Q86TV6	ENSG00000165914_TTC7B	2.95079	2.68693	13.2366	6.96389e-18	1.65528e-16	30.5063
ENSG00000139725	RHOF	54509	Q9HBH0	ENSG00000139725_RHOF	-2.20426	4.13978	-13.2302	7.09463e-18	1.68405e-16	30.3469
ENSG00000182175	RGMA	56963	Q96B86	ENSG00000182175_RGMA	-3.88205	1.69025	-13.2206	7.29908e-18	1.73021e-16	30.4455
ENSG00000099250	NRP1	8829	Q5JWQ6	ENSG00000099250_NRP1	2.03396	7.1353	13.2007	7.73765e-18	1.83167e-16	29.9179
ENSG00000163508	EOMES	8320	O95936	ENSG00000163508_EOMES	4.64302	-0.194214	13.1936	7.9003e-18	1.86507e-16	30.1631
ENSG00000102996	MMP15	4324	P51511	ENSG00000102996_MMP15	-1.41039	4.38514	-13.1936	7.8991e-18	1.86507e-16	30.1743
ENSG00000203727	SAMD5	389432	Q5TGI4	ENSG00000203727_SAMD5	4.87163	1.17923	13.1806	8.20777e-18	1.92977e-16	30.2419
ENSG00000063660	GPC1	2817	P35052	ENSG00000063660_GPC1	1.45928	7.47799	13.181	8.19748e-18	1.92977e-16	29.8351
ENSG00000178031	ADAMTSL1	92949	NA	ENSG00000178031_ADAMTSL1	4.77132	-0.070759	13.1727	8.39965e-18	1.96954e-16	30.0356
ENSG00000176928	GCNT4	51301	Q9P109	ENSG00000176928_GCNT4	2.88126	1.5017	13.1624	8.6577e-18	2.02731e-16	30.2968
ENSG00000160255	ITGB2	3689	NA	ENSG00000160255_ITGB2	-4.31133	3.18439	-13.1594	8.73585e-18	2.04285e-16	30.2909
ENSG00000165359	INTS6L	203522	Q5JSJ4	ENSG00000165359_INTS6L	1.37341	3.9804	13.127	9.60897e-18	2.24097e-16	29.993
ENSG00000163032	VSNL1	7447	P62760	ENSG00000163032_VSNL1	2.09553	5.10467	13.123	9.72292e-18	2.26146e-16	29.854
ENSG00000163702	IL17RC	84818	Q8NAC3	ENSG00000163702_IL17RC	-1.38848	4.55221	-13.1218	9.75921e-18	2.26686e-16	29.9242
ENSG00000154930	ACSS1	84532	NA	ENSG00000154930_ACSS1	3.18491	1.77479	13.1157	9.9341e-18	2.30439e-16	30.1586
ENSG00000153885	KCTD15	79047	K7EM48	ENSG00000153885_KCTD15	1.4253	5.34681	13.1049	1.02559e-17	2.37586e-16	29.758
ENSG00000065060	UHRF1BP1	54887	Q6BDS2	ENSG00000065060_UHRF1BP1	-1.17343	5.43178	-13.089	1.07493e-17	2.48351e-16	29.7038
ENSG00000146648	EGFR	1956	Q504U8	ENSG00000146648_EGFR	1.19024	9.22178	13.081	1.10046e-17	2.53911e-16	29.5026
ENSG00000147465	STAR	6770	P49675	ENSG00000147465_STAR	4.35276	-0.344011	13.0604	1.1695e-17	2.69484e-16	29.7623
ENSG00000133056	PIK3C2B	5287	O00750	ENSG00000133056_PIK3C2B	-1.37081	4.19008	-13.0591	1.17395e-17	2.70149e-16	29.7906
ENSG00000109586	GALNT7	51809	Q86SF2	ENSG00000109586_GALNT7	-1.02214	6.62747	-13.0556	1.18646e-17	2.72665e-16	29.5023
ENSG00000049130	KITLG	4254	NA	ENSG00000049130_KITLG	1.5803	5.8949	13.0529	1.19577e-17	2.74441e-16	29.5269
ENSG00000092068	SLC7A8	23428	H0Y2X7	ENSG00000092068_SLC7A8	4.74165	3.82645	13.0336	1.26586e-17	2.89759e-16	29.8887
ENSG00000147408	CSGALNACT1	55790	Q8TDX6	ENSG00000147408_CSGALNACT1	-5.05401	3.6772	-13.0298	1.28042e-17	2.92705e-16	29.9111
ENSG00000132357	CARD6	84674	Q9BX69	ENSG00000132357_CARD6	-2.32302	3.89957	-13.0245	1.30043e-17	2.96888e-16	29.7366
ENSG00000266088	RP5-1028K7.2	NA	NA	ENSG00000266088_RP5-1028K7.2	2.21765	0.920746	13.0216	1.31166e-17	2.9875e-16	29.8617
ENSG00000182010	RTKN2	219790	Q5SVY4	ENSG00000182010_RTKN2	-2.38468	4.45344	-13.0176	1.32729e-17	3.01431e-16	29.6932
ENSG00000221963	APOL6	80830	Q9BWW8	ENSG00000221963_APOL6	-1.24794	6.3371	-13.0069	1.3699e-17	3.10702e-16	29.387
ENSG00000162241	SLC25A45	283130	NA	ENSG00000162241_SLC25A45	-1.92604	0.709739	-12.983	1.47068e-17	3.32689e-16	29.7411
ENSG00000079385	CEACAM1	634	P13688	ENSG00000079385_CEACAM1	-3.17096	5.39927	-12.9818	1.47587e-17	3.33427e-16	29.4671
ENSG00000130487	KLHDC7B	113730	Q96G42	ENSG00000130487_KLHDC7B	-4.72129	-0.566711	-12.9755	1.50364e-17	3.3926e-16	29.4201
ENSG00000126878	AIF1L	83543	H7C605	ENSG00000126878_AIF1L	-2.31553	5.41201	-12.973	1.515e-17	3.41377e-16	29.4145
ENSG00000237943	PRKCQ-AS1	NA	NA	ENSG00000237943_PRKCQ-AS1	1.76091	2.81902	12.9699	1.52899e-17	3.44081e-16	29.6814
ENSG00000136542	GALNT5	11227	Q7Z7M9	ENSG00000136542_GALNT5	2.94038	4.28623	12.946	1.64112e-17	3.68838e-16	29.5013
ENSG00000109743	BST1	683	Q10588	ENSG00000109743_BST1	-2.95511	0.876029	-12.9455	1.64373e-17	3.68946e-16	29.6028
ENSG00000171102	OBP2B	29989	Q9NPH6	ENSG00000171102_OBP2B	-5.90357	-1.26833	-12.9414	1.66383e-17	3.72974e-16	29.1471
ENSG00000173535	TNFRSF10C	8794	E9PBT0	ENSG00000173535_TNFRSF10C	-3.10074	1.51113	-12.9322	1.70984e-17	3.82792e-16	29.619
ENSG00000166394	CYB5R2	51700	Q6BCY4	ENSG00000166394_CYB5R2	-2.44234	5.10586	-12.9313	1.71451e-17	3.83342e-16	29.3432
ENSG00000064886	CHI3L2	1117	Q15782	ENSG00000064886_CHI3L2	-4.63279	0.400408	-12.9212	1.7665e-17	3.9395e-16	29.4363
ENSG00000166780	C16orf45	89927	Q96MC5	ENSG00000166780_C16orf45	4.2749	-0.0508797	12.9102	1.82539e-17	4.06559e-16	29.318
ENSG00000079337	RAPGEF3	10411	O95398	ENSG00000079337_RAPGEF3	3.01657	4.08405	12.8839	1.97367e-17	4.37898e-16	29.3256
ENSG00000105426	PTPRS	5802	NA	ENSG00000105426_PTPRS	3.72707	4.27028	12.8678	2.07054e-17	4.58803e-16	29.3401
ENSG00000152767	FARP1	10160	C9JME2	ENSG00000152767_FARP1	-1.34843	6.61659	-12.8571	2.13797e-17	4.73139e-16	28.9243
ENSG00000099377	HSD3B7	80270	Q9H2F3	ENSG00000099377_HSD3B7	-1.66489	3.11579	-12.8559	2.14555e-17	4.7421e-16	29.3014
ENSG00000272502	RP11-713M15.2	NA	NA	ENSG00000272502_RP11-713M15.2	-3.70696	-3.56037	-12.8496	2.18618e-17	4.82575e-16	28.5285
ENSG00000124171	PARD6B	84612	Q9BYG5	ENSG00000124171_PARD6B	-1.39703	2.75629	-12.8446	2.21922e-17	4.88624e-16	29.3171
ENSG00000106688	SLC1A1	6505	P43005	ENSG00000106688_SLC1A1	-4.65586	2.46318	-12.8285	2.32834e-17	5.11998e-16	29.3202
ENSG00000137752	CASP1	834	H0YEC7	ENSG00000137752_CASP1	1.49216	5.38492	12.8261	2.34513e-17	5.15037e-16	28.931
ENSG00000113231	PDE8B	8622	D6RJD7	ENSG00000113231_PDE8B	-4.35853	-1.7475	-12.8222	2.37252e-17	5.20392e-16	28.8041
ENSG00000183578	TNFAIP8L3	388121	Q5GJ75	ENSG00000183578_TNFAIP8L3	3.53862	0.0535237	12.8164	2.41376e-17	5.28769e-16	29.1188
ENSG00000242147	RP13-463N16.6	105376382	NA	ENSG00000242147_RP13-463N16.6	2.77256	0.952366	12.8157	2.4186e-17	5.2916e-16	29.2562
ENSG00000004700	RECQL	5965	P46063	ENSG00000004700_RECQL	1.0309	6.4762	12.8047	2.49991e-17	5.45573e-16	28.749
ENSG00000130517	PGPEP1	54858	Q9NXJ5	ENSG00000130517_PGPEP1	-1.46594	4.27806	-12.7702	2.77134e-17	6.02532e-16	28.9326
ENSG00000176387	HSD11B2	3291	NA	ENSG00000176387_HSD11B2	-2.25655	1.80312	-12.7677	2.79173e-17	6.06204e-16	29.1387
ENSG00000163545	NUAK2	81788	Q9H093	ENSG00000163545_NUAK2	2.98564	2.64695	12.7645	2.8191e-17	6.10787e-16	29.1127
ENSG00000273259	SERPINA3	12	G3V5I3	ENSG00000273259_SERPINA3	-4.77978	-2.54743	-12.7477	2.96381e-17	6.4036e-16	28.474
ENSG00000166086	JAM3	83700	Q9BX67	ENSG00000166086_JAM3	5.37217	2.63738	12.7256	3.16741e-17	6.82647e-16	29.007
ENSG00000187601	MAGEH1	28986	Q9H213	ENSG00000187601_MAGEH1	2.14812	0.659044	12.7165	3.25476e-17	7.00603e-16	28.9649
ENSG00000213190	MLLT11	10962	Q13015	ENSG00000213190_MLLT11	1.64956	5.33508	12.7072	3.34622e-17	7.19397e-16	28.6006
ENSG00000003096	KLHL13	90293	A0A0C4DG99	ENSG00000003096_KLHL13	2.66336	3.83893	12.7064	3.35431e-17	7.20242e-16	28.7809
ENSG00000087494	PTHLH	5744	P12272	ENSG00000087494_PTHLH	2.21919	7.46521	12.6865	3.56122e-17	7.63723e-16	28.3574
ENSG00000196422	PPP1R26	9858	Q5T8A7	ENSG00000196422_PPP1R26	-1.09394	4.94111	-12.6841	3.58736e-17	7.68377e-16	28.5669
ENSG00000124107	SLPI	6590	P03973	ENSG00000124107_SLPI	-3.75159	5.8831	-12.6824	3.60547e-17	7.71303e-16	28.5238
ENSG00000188613	NANOS1	340719	Q8WY41	ENSG00000188613_NANOS1	-2.66197	3.82568	-12.6807	3.62384e-17	7.74278e-16	28.7487
ENSG00000158292	GPR153	387509	Q6NV75	ENSG00000158292_GPR153	1.6162	5.4457	12.6747	3.68932e-17	7.87296e-16	28.4608
ENSG00000171033	PKIA	5569	P61925	ENSG00000171033_PKIA	4.41736	0.684827	12.6702	3.74012e-17	7.96178e-16	28.7361
ENSG00000197093	GAL3ST4	79690	Q96RP7	ENSG00000197093_GAL3ST4	2.14611	1.85483	12.6683	3.76158e-17	7.99763e-16	28.8477
ENSG00000133687	TMTC1	83857	Q8IUR5	ENSG00000133687_TMTC1	3.00293	6.70248	12.6661	3.78621e-17	8.03029e-16	28.3486
ENSG00000144366	GULP1	51454	Q9UBP9	ENSG00000144366_GULP1	-2.43191	3.91279	-12.6634	3.81725e-17	8.07634e-16	28.7241
ENSG00000248538	RP11-10A14.5	101929128	NA	ENSG00000248538_RP11-10A14.5	-2.57317	0.212246	-12.6586	3.87188e-17	8.17199e-16	28.7171
ENSG00000142619	PADI3	51702	Q9ULW8	ENSG00000142619_PADI3	3.88198	0.222954	12.6517	3.95329e-17	8.33364e-16	28.6238
ENSG00000159899	NPR2	4882	P20594	ENSG00000159899_NPR2	1.68751	2.6626	12.6487	3.98899e-17	8.39868e-16	28.7409
ENSG00000225614	ZNF469	84627	H3BS19	ENSG00000225614_ZNF469	-6.17736	2.33779	-12.644	4.0457e-17	8.50774e-16	28.6901
ENSG00000137821	LRRC49	54839	Q8IUZ0	ENSG00000137821_LRRC49	1.2586	2.88984	12.6399	4.09684e-17	8.60485e-16	28.6928
ENSG00000189127	ANKRD34B	340120	A5PLL1	ENSG00000189127_ANKRD34B	-3.82733	-2.83964	-12.6345	4.1632e-17	8.73196e-16	28.0206
ENSG00000137474	MYO7A	4647	Q13402	ENSG00000137474_MYO7A	1.73597	2.39875	12.6338	4.17264e-17	8.73231e-16	28.7219
ENSG00000146955	RAB19	401409	C9JJQ5	ENSG00000146955_RAB19	-4.21717	-1.36424	-12.6323	4.19112e-17	8.7604e-16	28.3322
ENSG00000026297	RNASET2	8635	D6REQ6	ENSG00000026297_RNASET2	-1.30982	3.5631	-12.615	4.41528e-17	9.21782e-16	28.5476
ENSG00000258929	NA	NA	NA	ENSG00000258929_NA	-1.74404	1.35629	-12.6118	4.45743e-17	9.29462e-16	28.6744
ENSG00000011332	DPF1	8193	Q92782	ENSG00000011332_DPF1	1.8993	0.494604	12.6109	4.4695e-17	9.3086e-16	28.6465
ENSG00000125648	SLC25A23	79085	M0R2F3	ENSG00000125648_SLC25A23	-1.3352	5.65499	-12.607	4.52277e-17	9.40823e-16	28.2465
ENSG00000162512	SDC3	9672	D3DPN2	ENSG00000162512_SDC3	1.56661	5.6227	12.5981	4.64549e-17	9.65192e-16	28.227
ENSG00000126561	STAT5A	6776	P42229	ENSG00000126561_STAT5A	-2.44205	2.70099	-12.5843	4.84238e-17	1.00369e-15	28.5545
ENSG00000140284	SLC27A2	11001	O14975	ENSG00000140284_SLC27A2	-3.61221	1.11326	-12.5813	4.88694e-17	1.01172e-15	28.5552
ENSG00000138074	SLC5A6	8884	Q9Y289	ENSG00000138074_SLC5A6	-1.5355	6.49369	-12.5714	5.03454e-17	1.04103e-15	28.0592
ENSG00000116729	WLS	79971	Q5T9L3	ENSG00000116729_WLS	1.37601	6.79266	12.5697	5.06051e-17	1.04516e-15	28.029
ENSG00000132321	IQCA1	79781	Q86XH1	ENSG00000132321_IQCA1	3.40792	2.86482	12.5645	5.14069e-17	1.05919e-15	28.5208
ENSG00000196628	TCF4	6925	NA	ENSG00000196628_TCF4	2.2991	3.69197	12.5557	5.27947e-17	1.08649e-15	28.3647
ENSG00000134775	FHOD3	80206	Q2V2M9	ENSG00000134775_FHOD3	1.83794	5.79906	12.5465	5.42835e-17	1.11581e-15	28.0773
ENSG00000101846	STS	412	P08842	ENSG00000101846_STS	-2.35734	4.40265	-12.5457	5.4415e-17	1.11718e-15	28.2616
ENSG00000197892	KIF13B	23303	Q9NQT8	ENSG00000197892_KIF13B	-1.22579	5.51341	-12.5431	5.48408e-17	1.12194e-15	28.0666
ENSG00000163131	CTSS	1520	P25774	ENSG00000163131_CTSS	-3.08094	2.23719	-12.5437	5.47367e-17	1.12194e-15	28.4679
ENSG00000102781	KATNAL1	84056	Q9BW62	ENSG00000102781_KATNAL1	1.07419	4.94687	12.5416	5.50962e-17	1.12583e-15	28.1068
ENSG00000165188	RNF183	138065	Q96D59	ENSG00000165188_RNF183	-4.04841	0.35775	-12.5338	5.64076e-17	1.14857e-15	28.3172
ENSG00000165185	KIAA1958	158405	Q8N8K9	ENSG00000165185_KIAA1958	-1.14076	3.25892	-12.516	5.95259e-17	1.20639e-15	28.2673
ENSG00000184292	TACSTD2	4070	P09758	ENSG00000184292_TACSTD2	-1.58497	9.10098	-12.5102	6.05664e-17	1.22604e-15	27.7829
ENSG00000124249	KCNK15	60598	Q9H427	ENSG00000124249_KCNK15	-5.709	-1.24446	-12.5033	6.18531e-17	1.25063e-15	27.9558
ENSG00000196730	DAPK1	1612	P53355	ENSG00000196730_DAPK1	-4.24518	4.01688	-12.496	6.32243e-17	1.27687e-15	28.2888
ENSG00000134901	KDELC1	79070	Q6UW63	ENSG00000134901_KDELC1	1.15838	3.74243	12.4892	6.45497e-17	1.3006e-15	28.137
ENSG00000116717	GADD45A	1647	P24522	ENSG00000116717_GADD45A	1.42389	5.61928	12.4835	6.5665e-17	1.32e-15	27.8509
ENSG00000167995	BEST1	7439	O76090	ENSG00000167995_BEST1	-2.72918	2.5977	-12.4704	6.8338e-17	1.37214e-15	28.2472
ENSG00000090376	IRAK3	102465249	Q9Y616	ENSG00000090376_IRAK3	2.19115	3.25748	12.4651	6.94415e-17	1.39269e-15	28.1321
ENSG00000113396	SLC27A6	28965	D6RAJ2	ENSG00000113396_SLC27A6	5.43094	2.43636	12.4426	7.4339e-17	1.48919e-15	28.1301
ENSG00000153113	CAST	831	NA	ENSG00000153113_CAST	-1.46934	10.1127	-12.4325	7.66396e-17	1.5335e-15	27.5392
ENSG00000228951	RP11-336A10.4	NA	NA	ENSG00000228951_RP11-336A10.4	5.52545	-0.156513	12.4176	8.01935e-17	1.60276e-15	27.8692
ENSG00000048052	HDAC9	9734	Q9UKV0	ENSG00000048052_HDAC9	-4.1134	2.32197	-12.4028	8.38712e-17	1.67048e-15	28.0563
ENSG00000172137	CALB2	794	P22676	ENSG00000172137_CALB2	-6.64879	3.77313	-12.3917	8.67488e-17	1.72581e-15	28.0238
ENSG00000129595	EPB41L4A	64097	NA	ENSG00000129595_EPB41L4A	-2.5638	4.48305	-12.3846	8.86494e-17	1.75958e-15	27.7159
ENSG00000167191	GPRC5B	51704	Q9NZH0	ENSG00000167191_GPRC5B	-5.62736	2.26739	-12.3847	8.86319e-17	1.75958e-15	27.9802
ENSG00000171680	PLEKHG5	57449	NA	ENSG00000171680_PLEKHG5	1.97586	5.81489	12.3824	8.92576e-17	1.76963e-15	27.517
ENSG00000254389	RHPN1-AS1	78998	NA	ENSG00000254389_RHPN1-AS1	-2.47925	-0.22811	-12.3678	9.33023e-17	1.84349e-15	27.8008
ENSG00000229124	VIM-AS1	100507347	NA	ENSG00000229124_VIM-AS1	1.7094	3.32858	12.3628	9.47182e-17	1.86721e-15	27.8346
ENSG00000169550	MUC15	143662	Q8N387	ENSG00000169550_MUC15	-6.42615	0.201909	-12.358	9.61314e-17	1.89077e-15	27.6768
ENSG00000253414	RP11-150O12.6	NA	NA	ENSG00000253414_RP11-150O12.6	-3.32455	-3.17295	-12.3546	9.71192e-17	1.90587e-15	27.2173
ENSG00000149639	SOGA1	140710	O94964	ENSG00000149639_SOGA1	1.13422	6.59471	12.3489	9.88278e-17	1.9372e-15	27.3607
ENSG00000246695	RASSF8-AS1	NA	NA	ENSG00000246695_RASSF8-AS1	1.5693	2.11985	12.3384	1.02049e-16	1.99809e-15	27.844
ENSG00000152217	SETBP1	26040	Q9Y6X0	ENSG00000152217_SETBP1	1.58968	4.52768	12.3357	1.02894e-16	2.01236e-15	27.5501
ENSG00000198774	RASSF9	9182	O75901	ENSG00000198774_RASSF9	1.60853	3.34694	12.3327	1.03839e-16	2.02855e-15	27.7153
ENSG00000137177	KIF13A	63971	Q9H1H9	ENSG00000137177_KIF13A	1.19451	6.5057	12.3293	1.0492e-16	2.04735e-15	27.3038
ENSG00000115457	IGFBP2	3485	C9JW52	ENSG00000115457_IGFBP2	2.49319	6.98322	12.3242	1.06548e-16	2.07446e-15	27.2729
ENSG00000166920	C15orf48	100126311	Q9C002	ENSG00000166920_C15orf48	-6.01789	2.17461	-12.3243	1.06524e-16	2.07446e-15	27.7417
ENSG00000124145	SDC4	6385	P31431	ENSG00000124145_SDC4	-1.08885	9.09738	-12.3116	1.10711e-16	2.15309e-15	27.1706
ENSG00000161798	AQP5	362	P55064	ENSG00000161798_AQP5	-5.69347	-0.825604	-12.3108	1.11007e-16	2.15642e-15	27.4625
ENSG00000185477	GPRIN3	285513	Q6ZVF9	ENSG00000185477_GPRIN3	-6.41821	-0.0746974	-12.3023	1.13918e-16	2.20802e-15	27.4786
ENSG00000233834	AC005083.1	100506098	NA	ENSG00000233834_AC005083.1	-3.39406	-1.1134	-12.2885	1.18804e-16	2.30016e-15	27.4729
ENSG00000272512	RP11-54O7.17	NA	NA	ENSG00000272512_RP11-54O7.17	-4.12058	-1.84144	-12.2866	1.19512e-16	2.31128e-15	27.3652
ENSG00000171587	DSCAM	1826	O60469	ENSG00000171587_DSCAM	3.17859	2.19177	12.2752	1.23737e-16	2.39032e-15	27.6661
ENSG00000005243	COPZ2	51226	NA	ENSG00000005243_COPZ2	1.90818	2.56769	12.2735	1.24373e-16	2.39992e-15	27.6084
ENSG00000181982	CCDC149	91050	Q6ZUS6	ENSG00000181982_CCDC149	-1.39713	3.21511	-12.2723	1.24825e-16	2.4046e-15	27.5552
ENSG00000167861	HID1	283987	NA	ENSG00000167861_HID1	-4.78409	1.98495	-12.2721	1.24893e-16	2.4046e-15	27.6472
ENSG00000253819	LINC01151	104266958	NA	ENSG00000253819_LINC01151	3.59522	-2.21189	12.2633	1.28296e-16	2.46738e-15	27.2317
ENSG00000150893	FREM2	341640	Q5SZK8	ENSG00000150893_FREM2	-5.56564	2.37142	-12.2555	1.31417e-16	2.52437e-15	27.593
ENSG00000143850	PLEKHA6	22874	Q9Y2H5	ENSG00000143850_PLEKHA6	-1.44292	4.97309	-12.244	1.3613e-16	2.60936e-15	27.2302
ENSG00000119630	PGF	5228	P49763	ENSG00000119630_PGF	3.42942	3.63744	12.2436	1.36294e-16	2.60961e-15	27.4918
ENSG00000143590	EFNA3	1944	P52797	ENSG00000143590_EFNA3	-2.62349	2.46511	-12.2387	1.38333e-16	2.64573e-15	27.5327
ENSG00000233237	LINC00472	NA	NA	ENSG00000233237_LINC00472	-2.02556	1.79229	-12.2331	1.40714e-16	2.68534e-15	27.5363
ENSG00000140368	PSTPIP1	9051	H0YLM9	ENSG00000140368_PSTPIP1	2.25716	0.864936	12.2286	1.42661e-16	2.7195e-15	27.5291
ENSG00000197084	LCE1C	353133	Q5T751	ENSG00000197084_LCE1C	3.5334	-2.40689	12.222	1.45603e-16	2.76646e-15	27.0773
ENSG00000164746	C7orf57	136288	C9JQZ6	ENSG00000164746_C7orf57	3.60063	-1.45353	12.2194	1.46769e-16	2.78557e-15	27.2177
ENSG00000226887	ERVMER34-1	100288413	NA	ENSG00000226887_ERVMER34-1	1.92429	4.83511	12.2147	1.48887e-16	2.82267e-15	27.1431
ENSG00000152784	PRDM8	56978	NA	ENSG00000152784_PRDM8	4.6028	0.347527	12.2137	1.49319e-16	2.82776e-15	27.3783
ENSG00000175130	MARCKSL1	65108	P49006	ENSG00000175130_MARCKSL1	-2.43888	5.93659	-12.207	1.52416e-16	2.87698e-15	27.0722
ENSG00000152953	STK32B	55351	Q9NY57	ENSG00000152953_STK32B	3.81659	-2.1149	12.2046	1.53541e-16	2.89505e-15	26.9767
ENSG00000168675	LDLRAD4	753	NA	ENSG00000168675_LDLRAD4	-6.24628	-1.05054	-12.1999	1.55797e-16	2.93441e-15	27.073
ENSG00000143384	MCL1	4170	Q07820	ENSG00000143384_MCL1	1.04242	9.58354	12.1956	1.57835e-16	2.96367e-15	26.8085
ENSG00000240859	AC093627.10	NA	NA	ENSG00000240859_AC093627.10	-1.61711	1.976	-12.196	1.57648e-16	2.96367e-15	27.4209
ENSG00000256916	RP11-817J15.2	NA	NA	ENSG00000256916_RP11-817J15.2	-6.02192	-1.18268	-12.1956	1.57864e-16	2.96367e-15	27.0271
ENSG00000111145	ELK3	2004	P41970	ENSG00000111145_ELK3	1.10517	6.96648	12.1932	1.59044e-16	2.98258e-15	26.8516
ENSG00000198189	HSD17B11	51170	Q8NBQ5	ENSG00000198189_HSD17B11	3.15694	1.07949	12.1889	1.61125e-16	3.01509e-15	27.3867
ENSG00000168269	FOXI1	2299	Q12951	ENSG00000168269_FOXI1	-7.35515	0.860659	-12.183	1.64085e-16	3.06387e-15	27.2105
ENSG00000261572	RP11-384L8.1	NA	NA	ENSG00000261572_RP11-384L8.1	-3.66838	-2.15876	-12.1824	1.64366e-16	3.0658e-15	26.9185
ENSG00000142661	MYOM3	127294	Q5VTT5	ENSG00000142661_MYOM3	3.72721	-0.99056	12.1784	1.66424e-16	3.10086e-15	27.1453
ENSG00000237361	TUSC8	NA	NA	ENSG00000237361_TUSC8	-3.76197	-3.29767	-12.1755	1.67885e-16	3.12472e-15	26.6723
ENSG00000163577	EIF5A2	56648	Q9GZV4	ENSG00000163577_EIF5A2	1.21119	3.91868	12.1661	1.72827e-16	3.20979e-15	27.0801
ENSG00000164442	CITED2	10370	Q99967	ENSG00000164442_CITED2	-1.60458	5.92966	-12.1501	1.81478e-16	3.36326e-15	26.8136
ENSG00000171130	ATP6V0E2	155066	E9PAS2	ENSG00000171130_ATP6V0E2	-2.453	3.95606	-12.1477	1.82817e-16	3.38446e-15	27.1227
ENSG00000124839	RAB17	64284	F8WAG1	ENSG00000124839_RAB17	-1.22792	4.1238	-12.1445	1.84655e-16	3.41483e-15	27.0217
ENSG00000127252	HRASLS	57110	X6R3D1	ENSG00000127252_HRASLS	-3.29182	0.194323	-12.1408	1.8678e-16	3.44951e-15	27.1724
ENSG00000148841	ITPRIP	85450	Q8IWB1	ENSG00000148841_ITPRIP	1.11342	5.625	12.1321	1.91835e-16	3.5363e-15	26.7697
ENSG00000260944	FOXC2-AS1	103752587	NA	ENSG00000260944_FOXC2-AS1	4.36175	-2.18049	12.1228	1.97393e-16	3.63489e-15	26.6989
ENSG00000071054	MAP4K4	9448	E7ETN6	ENSG00000071054_MAP4K4	1.09924	8.8966	12.1212	1.98341e-16	3.6446e-15	26.5825
ENSG00000112164	GLP1R	2740	P43220	ENSG00000112164_GLP1R	-5.50043	-0.376443	-12.1024	2.10168e-16	3.84561e-15	26.8837
ENSG00000081985	IL12RB2	3595	Q99665	ENSG00000081985_IL12RB2	4.11587	-1.86994	12.0992	2.12272e-16	3.88001e-15	26.8086
ENSG00000008196	TFAP2B	7021	X6R4Y8	ENSG00000008196_TFAP2B	4.00539	0.300185	12.0987	2.12537e-16	3.88076e-15	27.0527
ENSG00000249007	RP11-510N19.5	NA	NA	ENSG00000249007_RP11-510N19.5	-4.59516	-2.27478	-12.0847	2.2192e-16	4.04356e-15	26.6999
ENSG00000183048	SLC25A10	1468	I3L3N9	ENSG00000183048_SLC25A10	-1.04002	3.11738	-12.0617	2.38197e-16	4.32196e-15	26.8845
ENSG00000101842	VSIG1	340547	Q86XK7	ENSG00000101842_VSIG1	2.21046	0.491058	12.0552	2.43008e-16	4.39769e-15	26.978
ENSG00000244067	GSTA2	2939	P09210	ENSG00000244067_GSTA2	-3.81503	-2.7459	-12.0551	2.43132e-16	4.39769e-15	26.4983
ENSG00000110195	FOLR1	2348	P15328	ENSG00000110195_FOLR1	-4.05187	1.72345	-12.0486	2.48041e-16	4.4818e-15	26.9813
ENSG00000188211	NCR3LG1	374383	Q68D85	ENSG00000188211_NCR3LG1	1.87584	3.77208	12.044	2.51574e-16	4.54091e-15	26.7518
ENSG00000104219	ZDHHC2	51201	Q9UIJ5	ENSG00000104219_ZDHHC2	-1.1724	5.33406	-12.0349	2.58774e-16	4.66601e-15	26.5266
ENSG00000265096	C1QTNF1-AS1	100507410	NA	ENSG00000265096_C1QTNF1-AS1	-3.75277	-1.7149	-12.0328	2.60399e-16	4.69043e-15	26.6257
ENSG00000272163	GS1-72M22.1	NA	NA	ENSG00000272163_GS1-72M22.1	4.14582	-1.9995	12.0293	2.63233e-16	4.73656e-15	26.5047
ENSG00000203722	RAET1G	353091	Q6H3X3	ENSG00000203722_RAET1G	2.38172	2.25655	12.0234	2.68124e-16	4.81955e-15	26.8638
ENSG00000188549	C15orf52	388115	Q6ZUT6	ENSG00000188549_C15orf52	-1.61931	7.72241	-12.0223	2.69015e-16	4.83056e-15	26.3017
ENSG00000057019	DCBLD2	131566	Q96PD2	ENSG00000057019_DCBLD2	1.26724	9.24912	12.0218	2.69444e-16	4.83326e-15	26.2705
ENSG00000185760	KCNQ5	56479	Q9NR82	ENSG00000185760_KCNQ5	1.53771	4.07383	12.02	2.70953e-16	4.8553e-15	26.6519
ENSG00000268812	RP1-102K2.8	91370	NA	ENSG00000268812_RP1-102K2.8	-4.25309	-0.607535	-12.0177	2.72832e-16	4.88391e-15	26.6661
ENSG00000137877	SPTBN5	51332	Q9NRC6	ENSG00000137877_SPTBN5	-2.90146	3.89527	-12.0043	2.84367e-16	5.08514e-15	26.6814
ENSG00000179826	MRGPRX3	117195	Q96LB0	ENSG00000179826_MRGPRX3	3.25954	2.76895	12.0025	2.8597e-16	5.10854e-15	26.7818
ENSG00000254535	PABPC4L	132430	P0CB38	ENSG00000254535_PABPC4L	3.1891	-1.02097	11.9965	2.91325e-16	5.19884e-15	26.6188
ENSG00000271133	CTA-293F17.1	NA	NA	ENSG00000271133_CTA-293F17.1	-2.22844	1.07971	-11.9937	2.93863e-16	5.23336e-15	26.8189
ENSG00000235027	AC068580.6	NA	NA	ENSG00000235027_AC068580.6	-2.31937	0.790301	-11.9875	2.99522e-16	5.32866e-15	26.7699
ENSG00000188833	ENTPD8	377841	Q5MY95	ENSG00000188833_ENTPD8	-5.85522	-1.58851	-11.9756	3.10784e-16	5.52334e-15	26.4104
ENSG00000157423	HYDIN	54768	Q4G0P3	ENSG00000157423_HYDIN	-2.55323	0.692029	-11.9648	3.21372e-16	5.70567e-15	26.6955
ENSG00000162645	GBP2	2634	P32456	ENSG00000162645_GBP2	-3.12406	3.6323	-11.9621	3.24023e-16	5.74685e-15	26.6227
ENSG00000111799	COL12A1	1303	H0Y5N9	ENSG00000111799_COL12A1	1.83854	9.14431	11.957	3.29136e-16	5.83155e-15	26.0716
ENSG00000144724	PTPRG	5793	NA	ENSG00000144724_PTPRG	1.9754	5.40152	11.9396	3.47429e-16	6.14938e-15	26.2235
ENSG00000148734	NPFFR1	64106	Q9GZQ6	ENSG00000148734_NPFFR1	-4.47387	-0.91376	-11.938	3.49178e-16	6.17404e-15	26.392
ENSG00000124406	ATP8A1	10396	H0YAA1	ENSG00000124406_ATP8A1	-3.48521	1.33951	-11.9369	3.50324e-16	6.18799e-15	26.6405
ENSG00000127249	ATP13A4	84239	Q4VNC1	ENSG00000127249_ATP13A4	-6.30828	1.05528	-11.9336	3.53951e-16	6.24569e-15	26.5057
ENSG00000176153	GPX2	2877	G3V323	ENSG00000176153_GPX2	3.55272	3.91351	11.9274	3.60758e-16	6.35933e-15	26.4765
ENSG00000184916	JAG2	3714	Q9Y219	ENSG00000184916_JAG2	1.19857	6.60068	11.9152	3.74683e-16	6.59137e-15	26.0144
ENSG00000062582	MRPS24	64951	Q96EL2	ENSG00000062582_MRPS24	-2.12843	0.392099	-11.9142	3.75846e-16	6.60514e-15	26.5393
ENSG00000130270	ATP8B3	148229	O60423	ENSG00000130270_ATP8B3	3.55523	0.735036	11.9052	3.8653e-16	6.77229e-15	26.5225
ENSG00000113430	IRX4	50805	P78413	ENSG00000113430_IRX4	2.37616	5.29212	11.9012	3.91375e-16	6.82955e-15	26.0966
ENSG00000115041	KCNIP3	30818	Q9Y2W7	ENSG00000115041_KCNIP3	-2.69353	4.0272	-11.8926	4.01897e-16	7.00611e-15	26.3144
ENSG00000151882	CCL28	56477	Q9NRJ3	ENSG00000151882_CCL28	-4.48919	5.34244	-11.8844	4.12263e-16	7.1796e-15	26.2274
ENSG00000168824	NSG1	27065	P42857	ENSG00000168824_NSG1	3.43005	3.53474	11.8804	4.17455e-16	7.26272e-15	26.3656
ENSG00000177098	SCN4B	6330	NA	ENSG00000177098_SCN4B	6.01074	1.36073	11.8787	4.19686e-16	7.2942e-15	26.3943
ENSG00000196154	S100A4	6275	P26447	ENSG00000196154_S100A4	-3.14301	3.78177	-11.8742	4.25493e-16	7.38033e-15	26.3083
ENSG00000172159	FRMD3	257019	A2A2Y4	ENSG00000172159_FRMD3	-5.85724	1.70719	-11.8723	4.28127e-16	7.41858e-15	26.3856
ENSG00000101986	ABCD1	215	P33897	ENSG00000101986_ABCD1	-2.01386	3.09704	-11.8698	4.31456e-16	7.4688e-15	26.3587
ENSG00000163083	INHBB	3625	P09529	ENSG00000163083_INHBB	-5.89103	1.83806	-11.8617	4.42445e-16	7.65139e-15	26.3677
ENSG00000273415	RP11-702B10.2	NA	NA	ENSG00000273415_RP11-702B10.2	-4.87202	-1.73985	-11.8597	4.45202e-16	7.69138e-15	26.0268
ENSG00000166503	RP11-382A20.3	50810	H3BPM9	ENSG00000166503_RP11-382A20.3	1.08646	5.82089	11.8585	4.46854e-16	7.71224e-15	25.8967
ENSG00000259178	CTD-2184D3.3	NA	NA	ENSG00000259178_CTD-2184D3.3	2.86031	-3.78497	11.8532	4.5425e-16	7.83209e-15	25.7175
ENSG00000121753	ADGRB2	576	A2A3C6	ENSG00000121753_ADGRB2	3.04407	-0.823774	11.8507	4.57848e-16	7.88627e-15	26.1774
ENSG00000256462	RP11-116G8.5	NA	NA	ENSG00000256462_RP11-116G8.5	4.08384	1.79787	11.8471	4.63008e-16	7.96723e-15	26.3707
ENSG00000184012	TMPRSS2	7113	O15393	ENSG00000184012_TMPRSS2	-6.86505	1.73631	-11.842	4.70409e-16	8.08108e-15	26.2479
ENSG00000115525	ST3GAL5	8869	Q9UNP4	ENSG00000115525_ST3GAL5	4.06735	2.03983	11.8386	4.75399e-16	8.15615e-15	26.3444
ENSG00000065923	SLC9A7	84679	Q96T83	ENSG00000065923_SLC9A7	-1.36487	5.60642	-11.8326	4.84251e-16	8.28341e-15	25.8616
ENSG00000237548	TTLL11-IT1	NA	NA	ENSG00000237548_TTLL11-IT1	4.35077	-1.96639	11.8257	4.9486e-16	8.44821e-15	25.9438
ENSG00000164520	RAET1E	135250	Q8TD07	ENSG00000164520_RAET1E	1.9836	3.06878	11.8243	4.96995e-16	8.4763e-15	26.1425
ENSG00000078596	ITM2A	9452	O43736	ENSG00000078596_ITM2A	4.66419	1.50539	11.8233	4.98577e-16	8.49229e-15	26.2809
ENSG00000171236	LRG1	116844	P02750	ENSG00000171236_LRG1	-4.14992	-0.547468	-11.823	4.98912e-16	8.49229e-15	26.1569
ENSG00000100065	CARD10	29775	NA	ENSG00000100065_CARD10	1.14064	6.81119	11.8179	5.06927e-16	8.62024e-15	25.6864
ENSG00000164509	IL31RA	133396	Q8NI17	ENSG00000164509_IL31RA	4.47852	0.350748	11.8166	5.09018e-16	8.64731e-15	26.1951
ENSG00000108375	RNF43	54894	Q68DV7	ENSG00000108375_RNF43	1.19565	4.29252	11.8038	5.29742e-16	8.99056e-15	25.9135
ENSG00000118276	B4GALT6	9331	NA	ENSG00000118276_B4GALT6	1.05608	4.11761	11.8003	5.35587e-16	9.08087e-15	25.9327
ENSG00000088836	SLC4A11	83959	Q8NBS3	ENSG00000088836_SLC4A11	-1.73258	5.35858	-11.7998	5.36379e-16	9.0854e-15	25.7798
ENSG00000101276	SLC52A3	113278	Q9NQ40	ENSG00000101276_SLC52A3	-4.09131	0.857371	-11.7981	5.3919e-16	9.1241e-15	26.1704
ENSG00000171105	INSR	3643	P06213	ENSG00000171105_INSR	-3.16399	4.37532	-11.7949	5.44659e-16	9.20767e-15	26.0172
ENSG00000135838	NPL	80896	NA	ENSG00000135838_NPL	2.01648	1.32014	11.794	5.46129e-16	9.22351e-15	26.2063
ENSG00000135905	DOCK10	55619	Q96BY6	ENSG00000135905_DOCK10	5.57302	1.21749	11.7846	5.62414e-16	9.48929e-15	26.0829
ENSG00000177822	AC108142.1	NA	NA	ENSG00000177822_AC108142.1	2.30383	2.29643	11.7763	5.77101e-16	9.72764e-15	26.1256
ENSG00000166828	SCNN1G	6340	P51170	ENSG00000166828_SCNN1G	-4.58905	2.86705	-11.7675	5.9326e-16	9.99029e-15	26.0817
ENSG00000188747	NOXA1	10811	Q86UR1	ENSG00000188747_NOXA1	-3.77974	0.642107	-11.7641	5.99606e-16	1.00873e-14	26.0817
ENSG00000014257	ACPP	55	P15309	ENSG00000014257_ACPP	-2.43527	1.50101	-11.7598	6.0773e-16	1.02054e-14	26.1
ENSG00000117009	KMO	8564	O15229	ENSG00000117009_KMO	-4.87626	2.08313	-11.7597	6.07802e-16	1.02054e-14	26.0888
ENSG00000171608	PIK3CD	5293	O00329	ENSG00000171608_PIK3CD	2.021	4.32585	11.7584	6.10268e-16	1.02369e-14	25.8359
ENSG00000245067	IGFBP7-AS1	255130	NA	ENSG00000245067_IGFBP7-AS1	3.69443	-1.80753	11.7489	6.28767e-16	1.0537e-14	25.731
ENSG00000226791	AC109826.1	NA	NA	ENSG00000226791_AC109826.1	-2.98319	-3.63826	-11.7442	6.37928e-16	1.06802e-14	25.4096
ENSG00000156804	FBXO32	114907	Q969P5	ENSG00000156804_FBXO32	-4.09959	6.94875	-11.7436	6.39103e-16	1.06896e-14	25.5718
ENSG00000091428	RAPGEF4	11069	NA	ENSG00000091428_RAPGEF4	3.5457	-0.241797	11.7339	6.58775e-16	1.09974e-14	25.9165
ENSG00000229153	EPHA1-AS1	285965	NA	ENSG00000229153_EPHA1-AS1	3.01708	-1.70105	11.7311	6.64617e-16	1.10735e-14	25.7302
ENSG00000171159	C9orf16	79095	Q9BUW7	ENSG00000171159_C9orf16	-1.19971	4.88089	-11.7073	7.15905e-16	1.18938e-14	25.5591
ENSG00000166145	SPINT1	6692	O43278	ENSG00000166145_SPINT1	-1.29988	8.48659	-11.7021	7.27602e-16	1.20765e-14	25.2793
ENSG00000170542	SERPINB9	5272	P50453	ENSG00000170542_SERPINB9	-3.16177	2.50334	-11.699	7.34852e-16	1.21852e-14	25.9029
ENSG00000003137	CYP26B1	56603	Q9NR63	ENSG00000003137_CYP26B1	4.70249	2.63829	11.6981	7.3678e-16	1.22055e-14	25.8789
ENSG00000227292	AC009229.5	NA	NA	ENSG00000227292_AC009229.5	-3.71172	-2.59371	-11.6946	7.449e-16	1.23282e-14	25.4559
ENSG00000158473	CD1D	912	P15813	ENSG00000158473_CD1D	5.22949	-0.254583	11.6935	7.47488e-16	1.23592e-14	25.7663
ENSG00000144642	RBMS3	27303	NA	ENSG00000144642_RBMS3	2.08887	3.17629	11.6898	7.56178e-16	1.24791e-14	25.7679
ENSG00000007968	E2F2	1870	Q14209	ENSG00000007968_E2F2	-2.33719	3.42799	-11.6778	7.85244e-16	1.29464e-14	25.6935
ENSG00000110911	SLC11A2	4891	H0YIV3	ENSG00000110911_SLC11A2	-1.26076	6.28295	-11.6765	7.88445e-16	1.29756e-14	25.2972
ENSG00000174669	SLC29A2	3177	G5E943	ENSG00000174669_SLC29A2	-1.62095	4.49324	-11.6765	7.88513e-16	1.29756e-14	25.5544
ENSG00000205488	CALML3-AS1	NA	NA	ENSG00000205488_CALML3-AS1	3.27126	2.33597	11.6759	7.89927e-16	1.29866e-14	25.8057
ENSG00000102038	SMARCA1	6594	NA	ENSG00000102038_SMARCA1	2.35161	4.94943	11.6646	8.18292e-16	1.34147e-14	25.5076
ENSG00000240207	RP11-379F4.4	NA	NA	ENSG00000240207_RP11-379F4.4	-3.62355	0.28839	-11.6595	8.31604e-16	1.36201e-14	25.7324
ENSG00000153956	CACNA2D1	781	P54289	ENSG00000153956_CACNA2D1	3.60479	3.06958	11.6533	8.47737e-16	1.38712e-14	25.7521
ENSG00000156298	TSPAN7	7102	P41732	ENSG00000156298_TSPAN7	4.98741	-1.28726	11.6398	8.84506e-16	1.44592e-14	25.4363
ENSG00000005001	PRSS22	64063	Q9GZN4	ENSG00000005001_PRSS22	-3.69346	2.5164	-11.6387	8.87618e-16	1.44964e-14	25.7146
ENSG00000117122	MFAP2	4237	P55001	ENSG00000117122_MFAP2	3.35642	3.52774	11.6362	8.94466e-16	1.45944e-14	25.6404
ENSG00000177707	NECTIN3	25945	C9IZE6	ENSG00000177707_NECTIN3	3.49523	1.21291	11.6239	9.29629e-16	1.51255e-14	25.6702
ENSG00000168389	MFSD2A	84879	Q8NA29	ENSG00000168389_MFSD2A	1.35324	5.91709	11.6226	9.33426e-16	1.51588e-14	25.1435
ENSG00000164649	CDCA7L	55536	Q96GN5	ENSG00000164649_CDCA7L	1.23438	5.32712	11.6228	9.33076e-16	1.51588e-14	25.2098
ENSG00000175984	DENND2C	163259	Q68D51	ENSG00000175984_DENND2C	1.27099	4.39342	11.6151	9.5593e-16	1.54952e-14	25.3003
ENSG00000141068	KSR1	8844	J3QKR8	ENSG00000141068_KSR1	-1.98415	2.55272	-11.6075	9.78927e-16	1.58531e-14	25.5381
ENSG00000136383	ALPK3	57538	Q96L96	ENSG00000136383_ALPK3	-3.97502	0.350857	-11.6014	9.97957e-16	1.61462e-14	25.5469
ENSG00000140937	CDH11	1009	P55287	ENSG00000140937_CDH11	4.81107	3.15004	11.5974	1.01047e-15	1.63334e-14	25.5773
ENSG00000204767	FAM196B	100131897	A6NMK8	ENSG00000204767_FAM196B	3.54513	1.50954	11.5914	1.02952e-15	1.66258e-14	25.583
ENSG00000130821	SLC6A8	6535	P48029	ENSG00000130821_SLC6A8	1.31146	5.87229	11.5909	1.03122e-15	1.6627e-14	25.0503
ENSG00000262801	U91319.1	NA	NA	ENSG00000262801_U91319.1	-3.87226	-3.50012	-11.5781	1.07357e-15	1.72888e-14	24.9664
ENSG00000175066	GK5	256356	Q6ZS86	ENSG00000175066_GK5	-1.15055	4.87714	-11.5749	1.08459e-15	1.74502e-14	25.1146
ENSG00000146054	TRIM7	81786	Q9C029	ENSG00000146054_TRIM7	1.32199	4.54433	11.5721	1.09415e-15	1.75875e-14	25.1538
ENSG00000184709	LRRC26	389816	Q2I0M4	ENSG00000184709_LRRC26	-4.6572	-3.075	-11.5685	1.10639e-15	1.7735e-14	25.0248
ENSG00000187240	DYNC2H1	79659	Q8NCM8	ENSG00000187240_DYNC2H1	1.12291	5.96098	11.5627	1.12709e-15	1.80334e-14	24.9394
ENSG00000169184	MN1	4330	Q10571	ENSG00000169184_MN1	4.43173	2.11835	11.562	1.12936e-15	1.80365e-14	25.4892
ENSG00000138193	PLCE1	51196	Q9P212	ENSG00000138193_PLCE1	-4.93326	1.49401	-11.5605	1.13485e-15	1.81074e-14	25.4608
ENSG00000225950	NTF4	4909	P34130	ENSG00000225950_NTF4	2.39927	1.38874	11.5569	1.14753e-15	1.82761e-14	25.4703
ENSG00000105929	ATP6V0A4	50617	Q9HBG4	ENSG00000105929_ATP6V0A4	-5.42948	2.22274	-11.5514	1.16775e-15	1.8581e-14	25.4512
ENSG00000147100	SLC16A2	6567	P36021	ENSG00000147100_SLC16A2	1.10778	5.96333	11.5397	1.21161e-15	1.92613e-14	24.8736
ENSG00000176641	RNF152	220441	Q8N8N0	ENSG00000176641_RNF152	3.22447	5.27731	11.539	1.21433e-15	1.92868e-14	25.0651
ENSG00000196136	SERPINA3	NA	NA	ENSG00000196136_SERPINA3	-5.85675	1.12565	-11.5367	1.22295e-15	1.9406e-14	25.3508
ENSG00000111907	TPD52L1	7164	E9PNQ9	ENSG00000111907_TPD52L1	-1.00462	7.13536	-11.5313	1.244e-15	1.97038e-14	24.7741
ENSG00000105855	ITGB8	3696	P26012	ENSG00000105855_ITGB8	-1.1451	7.94541	-11.5304	1.24768e-15	1.97441e-14	24.7393
ENSG00000102962	CCL22	6367	O00626	ENSG00000102962_CCL22	-5.79998	-0.71532	-11.5289	1.25336e-15	1.9816e-14	25.1702
ENSG00000127585	FBXL16	146330	NA	ENSG00000127585_FBXL16	-3.06356	0.870247	-11.524	1.27293e-15	2.0107e-14	25.3692
ENSG00000273193	NA	NA	NA	ENSG00000273193_NA	-3.7112	-3.1844	-11.519	1.29315e-15	2.04077e-14	24.8334
ENSG00000106992	AK1	203	P00568	ENSG00000106992_AK1	-1.06677	3.24253	-11.514	1.31383e-15	2.07152e-14	25.1848
ENSG00000110328	GALNT18	374378	Q6P9A2	ENSG00000110328_GALNT18	1.05461	4.81303	11.5122	1.32116e-15	2.08119e-14	24.9268
ENSG00000134258	VTCN1	79679	Q5T2L0	ENSG00000134258_VTCN1	-6.31149	3.61568	-11.5097	1.33166e-15	2.09582e-14	25.3068
ENSG00000132031	MATN3	4148	O15232	ENSG00000132031_MATN3	1.99011	2.32499	11.4992	1.3767e-15	2.16277e-14	25.2386
ENSG00000180264	ADGRD2	NA	NA	ENSG00000180264_ADGRD2	4.75239	-3.00619	11.4966	1.38788e-15	2.17837e-14	24.8291
ENSG00000186847	KRT14	3861	P02533	ENSG00000186847_KRT14	2.1161	11.3671	11.4935	1.40169e-15	2.19408e-14	24.6111
ENSG00000138131	LOXL4	84171	Q96JB6	ENSG00000138131_LOXL4	-4.57366	5.76125	-11.488	1.42606e-15	2.22619e-14	24.9571
ENSG00000213722	DDAH2	23564	H0Y7N1	ENSG00000213722_DDAH2	-1.4295	3.80109	-11.4874	1.42859e-15	2.22814e-14	25.039
ENSG00000186765	FSCN2	25794	O14926	ENSG00000186765_FSCN2	-3.48636	-1.92705	-11.4849	1.44023e-15	2.24428e-14	24.9435
ENSG00000259498	RP11-244F12.3	NA	NA	ENSG00000259498_RP11-244F12.3	-2.62106	-0.797421	-11.4547	1.58424e-15	2.45983e-14	25.0363
ENSG00000177191	B3GNT8	374907	Q7Z7M8	ENSG00000177191_B3GNT8	2.05955	1.22883	11.4508	1.60407e-15	2.48838e-14	25.1444
ENSG00000250742	RP11-834C11.4	400043	NA	ENSG00000250742_RP11-834C11.4	1.66288	3.02936	11.4494	1.61106e-15	2.49476e-14	24.9877
ENSG00000100504	PYGL	5836	E9PK47	ENSG00000100504_PYGL	1.00081	8.17679	11.4494	1.61085e-15	2.49476e-14	24.4786
ENSG00000164855	TMEM184A	202915	Q6ZMB5	ENSG00000164855_TMEM184A	-1.83064	4.10994	-11.4465	1.62582e-15	2.51312e-14	24.8463
ENSG00000163898	LIPH	200879	Q8WWY8	ENSG00000163898_LIPH	-5.80129	1.5214	-11.4406	1.65662e-15	2.55846e-14	25.0876
ENSG00000128655	PDE11A	50940	Q9HCR9	ENSG00000128655_PDE11A	-3.02199	-0.640841	-11.4375	1.67263e-15	2.58088e-14	24.9684
ENSG00000272565	NA	NA	NA	ENSG00000272565_NA	-1.16553	4.54425	-11.4317	1.70381e-15	2.62336e-14	24.7207
ENSG00000166823	MESP1	55897	Q9BRJ9	ENSG00000166823_MESP1	-4.41438	0.139279	-11.4315	1.7047e-15	2.62336e-14	24.9935
ENSG00000178718	RPP25	54913	Q9BUL9	ENSG00000178718_RPP25	-1.92072	2.48703	-11.4226	1.7534e-15	2.69592e-14	25.0025
ENSG00000137936	BCAR3	8412	O75815	ENSG00000137936_BCAR3	1.04247	7.06548	11.4177	1.78088e-15	2.73573e-14	24.4086
ENSG00000118777	ABCG2	9429	Q9UNQ0	ENSG00000118777_ABCG2	2.84443	1.5687	11.4159	1.7908e-15	2.74853e-14	25.0238
ENSG00000021300	PLEKHB1	58473	Q9UF11	ENSG00000021300_PLEKHB1	-5.28982	1.78648	-11.4138	1.80279e-15	2.76449e-14	25.0169
ENSG00000038295	TLL1	7092	O43897	ENSG00000038295_TLL1	2.69603	3.22021	11.4098	1.82602e-15	2.79764e-14	24.881
ENSG00000204421	LY6G6C	80740	G3V1A8	ENSG00000204421_LY6G6C	-4.01482	-1.946	-11.3959	1.90835e-15	2.91861e-14	24.6893
ENSG00000196437	ZNF569	148266	Q5MCW4	ENSG00000196437_ZNF569	1.17192	2.04645	11.3817	1.99588e-15	3.04711e-14	24.8844
ENSG00000233493	TMEM238	388564	C9JI98	ENSG00000233493_TMEM238	-1.29151	2.20837	-11.3807	2.0024e-15	3.05436e-14	24.8544
ENSG00000133816	MICAL2	9645	E9PRE0	ENSG00000133816_MICAL2	1.37386	7.65208	11.3795	2.00987e-15	3.06307e-14	24.2719
ENSG00000164309	CMYA5	202333	Q8N3K9	ENSG00000164309_CMYA5	-4.10418	3.52025	-11.3752	2.03768e-15	3.10272e-14	24.8088
ENSG00000138593	SECISBP2L	9728	H0YNT4	ENSG00000138593_SECISBP2L	-1.01124	6.39479	-11.3722	2.05667e-15	3.12889e-14	24.3104
ENSG00000171766	GATM	2628	P50440	ENSG00000171766_GATM	-2.9369	0.788515	-11.3603	2.13597e-15	3.24667e-14	24.8546
ENSG00000115526	CHST10	9486	O43529	ENSG00000115526_CHST10	2.57135	2.12277	11.3546	2.17477e-15	3.30275e-14	24.8068
ENSG00000172935	MRGPRF	116535	Q96AM1	ENSG00000172935_MRGPRF	4.00536	-2.64605	11.3472	2.22708e-15	3.37628e-14	24.4904
ENSG00000232530	RP1-102K2.6	NA	NA	ENSG00000232530_RP1-102K2.6	-3.33594	-3.23735	-11.3427	2.25915e-15	3.41891e-14	24.2921
ENSG00000147231	CXorf57	55086	Q6NSI4	ENSG00000147231_CXorf57	1.94074	2.14801	11.337	2.29986e-15	3.47749e-14	24.7415
ENSG00000164691	TAGAP	117289	Q8N103	ENSG00000164691_TAGAP	-4.18099	-0.669599	-11.3316	2.33986e-15	3.5318e-14	24.6242
ENSG00000176438	SYNE3	161176	Q6ZMZ3	ENSG00000176438_SYNE3	2.5836	0.92664	11.3279	2.36754e-15	3.57047e-14	24.7627
ENSG00000172197	MBOAT1	154141	Q6ZNC8	ENSG00000172197_MBOAT1	-1.11143	4.5857	-11.3255	2.38595e-15	3.59511e-14	24.3697
ENSG00000151229	SLC2A13	114134	Q96QE2	ENSG00000151229_SLC2A13	1.55693	1.88689	11.3238	2.39849e-15	3.61086e-14	24.705
ENSG00000163393	SLC22A15	55356	Q8IZD6	ENSG00000163393_SLC22A15	1.09885	3.7247	11.3133	2.47991e-15	3.7302e-14	24.4597
ENSG00000137501	SYTL2	54843	E9PIB5	ENSG00000137501_SYTL2	-2.41586	5.42	-11.3114	2.49518e-15	3.74992e-14	24.2758
ENSG00000167183	PRR15L	79170	Q9BU68	ENSG00000167183_PRR15L	-6.51597	0.904216	-11.3046	2.54941e-15	3.8281e-14	24.5981
ENSG00000176148	TCP11L1	55346	NA	ENSG00000176148_TCP11L1	1.07344	4.81792	11.3008	2.58088e-15	3.87199e-14	24.2771
ENSG00000125850	OVOL2	58495	NA	ENSG00000125850_OVOL2	-1.47109	3.50857	-11.2999	2.58754e-15	3.87862e-14	24.4678
ENSG00000141968	VAV1	7409	A0A0A0MR07	ENSG00000141968_VAV1	-5.33963	-1.54305	-11.2957	2.62246e-15	3.92417e-14	24.3991
ENSG00000091592	NLRP1	22861	Q9C000	ENSG00000091592_NLRP1	2.36377	3.83901	11.289	2.67941e-15	4.00593e-14	24.3971
ENSG00000136828	RALGPS1	9649	Q5JS13	ENSG00000136828_RALGPS1	-2.38928	0.878267	-11.2857	2.70728e-15	4.04411e-14	24.6296
ENSG00000198934	MAGEE1	57692	Q9HCI5	ENSG00000198934_MAGEE1	1.30863	2.25816	11.2757	2.79531e-15	4.16842e-14	24.5388
ENSG00000152495	CAMK4	814	D6RE65	ENSG00000152495_CAMK4	5.00735	1.89667	11.2714	2.83338e-15	4.21743e-14	24.5708
ENSG00000108639	SYNGR2	9144	O43760	ENSG00000108639_SYNGR2	-1.42462	6.04111	-11.2712	2.83547e-15	4.21743e-14	24.0243
ENSG00000107968	MAP3K8	1326	P41279	ENSG00000107968_MAP3K8	-2.24426	2.36716	-11.2607	2.93198e-15	4.34977e-14	24.4615
ENSG00000166016	ABTB2	25841	Q8N961	ENSG00000166016_ABTB2	-1.78087	3.74075	-11.2518	3.01649e-15	4.47132e-14	24.3039
ENSG00000140398	NEIL1	79661	H3BRZ2	ENSG00000140398_NEIL1	-2.28211	2.71502	-11.2444	3.08759e-15	4.5728e-14	24.3902
ENSG00000240204	SMKR1	100287482	H3BMG3	ENSG00000240204_SMKR1	-2.44681	0.438125	-11.2434	3.09748e-15	4.58354e-14	24.4803
ENSG00000196337	CGB7	94027	A0A0F7RQF0	ENSG00000196337_CGB7	2.32806	-1.02686	11.2186	3.35266e-15	4.94004e-14	24.2816
ENSG00000013392	RWDD2A	112611	Q9UIY3	ENSG00000013392_RWDD2A	-1.09197	2.09865	-11.2173	3.36728e-15	4.95736e-14	24.3695
ENSG00000163644	PPM1K	152926	Q8N3J5	ENSG00000163644_PPM1K	-1.47578	4.6898	-11.1971	3.59141e-15	5.27837e-14	23.9723
ENSG00000183421	RIPK4	54101	P57078	ENSG00000183421_RIPK4	-1.26441	7.07826	-11.1884	3.69195e-15	5.40778e-14	23.6848
ENSG00000143466	NA	NA	NA	ENSG00000143466_NA	-1.15781	4.11153	-11.1856	3.72518e-15	5.44951e-14	24.0077
ENSG00000072201	LNX1	84708	Q8TBB1	ENSG00000072201_LNX1	-3.22622	1.36903	-11.1855	3.72672e-15	5.44951e-14	24.3112
ENSG00000042286	AIFM2	84883	Q9BRQ8	ENSG00000042286_AIFM2	-1.22309	4.35177	-11.1833	3.75342e-15	5.4793e-14	23.9548
ENSG00000260604	RP1-140K8.5	NA	NA	ENSG00000260604_RP1-140K8.5	-5.1062	-1.03869	-11.1725	3.88474e-15	5.66146e-14	24.0838
ENSG00000122824	NUDT10	170685	Q8NFP7	ENSG00000122824_NUDT10	5.09741	-0.526791	11.1659	3.96766e-15	5.77259e-14	24.0729
ENSG00000164604	GPR85	54329	P60893	ENSG00000164604_GPR85	3.4648	-0.847232	11.1624	4.0118e-15	5.83192e-14	24.1111
ENSG00000117013	KCNQ4	9132	P56696	ENSG00000117013_KCNQ4	-3.25056	-0.965745	-11.1586	4.06113e-15	5.89868e-14	24.1013
ENSG00000137573	SULF1	23213	E9PI06	ENSG00000137573_SULF1	5.70114	1.62878	11.1571	4.08032e-15	5.92159e-14	24.185
ENSG00000119125	GDA	9615	Q5SZC6	ENSG00000119125_GDA	-4.48872	0.611791	-11.1554	4.10365e-15	5.95046e-14	24.1757
ENSG00000270097	NA	NA	NA	ENSG00000270097_NA	-4.25432	-1.97304	-11.1551	4.10761e-15	5.95123e-14	23.9412
ENSG00000100060	MFNG	4242	O00587	ENSG00000100060_MFNG	1.81597	2.06856	11.1508	4.16394e-15	6.02277e-14	24.1177
ENSG00000138640	FAM13A	10144	O94988	ENSG00000138640_FAM13A	-1.21504	5.09115	-11.1502	4.17227e-15	6.02979e-14	23.7409
ENSG00000261521	NA	NA	NA	ENSG00000261521_NA	-2.89667	0.746236	-11.1472	4.21262e-15	6.08303e-14	24.1874
ENSG00000273143	RP11-525A16.4	NA	NA	ENSG00000273143_RP11-525A16.4	3.14404	-1.51228	11.1412	4.29357e-15	6.17932e-14	23.9853
ENSG00000234899	SOX9-AS1	102723517	NA	ENSG00000234899_SOX9-AS1	-3.48708	1.83506	-11.1413	4.29197e-15	6.17932e-14	24.1752
ENSG00000197956	S100A6	6277	P06703	ENSG00000197956_S100A6	-1.19167	10.7543	-11.1357	4.36997e-15	6.27884e-14	23.4546
ENSG00000218336	TENM3	55714	NA	ENSG00000218336_TENM3	2.51289	5.52482	11.1354	4.37449e-15	6.28013e-14	23.7056
ENSG00000143409	FAM63A	55793	Q8N5J2	ENSG00000143409_FAM63A	-1.18762	5.33564	-11.1315	4.42959e-15	6.35397e-14	23.6532
ENSG00000261534	RP11-244O19.1	NA	NA	ENSG00000261534_RP11-244O19.1	3.54149	1.81114	11.1283	4.47459e-15	6.41321e-14	24.1289
ENSG00000113657	DPYSL3	1809	Q14195	ENSG00000113657_DPYSL3	1.91693	4.8451	11.1268	4.49693e-15	6.43991e-14	23.7012
ENSG00000147509	RGS20	8601	O76081	ENSG00000147509_RGS20	1.08955	4.13013	11.1195	4.60251e-15	6.58566e-14	23.7804
ENSG00000012779	ALOX5	240	P09917	ENSG00000012779_ALOX5	-6.15133	0.333208	-11.1153	4.66497e-15	6.66402e-14	23.9885
ENSG00000178776	C5orf46	389336	NA	ENSG00000178776_C5orf46	-3.94855	1.65046	-11.1066	4.79625e-15	6.84028e-14	24.0644
ENSG00000177181	RIMKLA	284716	X1WI25	ENSG00000177181_RIMKLA	-4.80817	-1.89587	-11.0981	4.92898e-15	7.01227e-14	23.7856
ENSG00000230498	RP4-564M11.2	NA	NA	ENSG00000230498_RP4-564M11.2	-3.21953	-3.16793	-11.0948	4.98211e-15	7.0685e-14	23.6271
ENSG00000188738	FSIP2	401024	Q5CZC0	ENSG00000188738_FSIP2	3.28039	-0.0499925	11.0942	4.99198e-15	7.07286e-14	24.0096
ENSG00000160932	LY6E	4061	E7EWF8	ENSG00000160932_LY6E	-1.17377	7.86604	-11.0856	5.13153e-15	7.24687e-14	23.3168
ENSG00000176058	TPRN	286262	H3BLU1	ENSG00000176058_TPRN	-1.33686	3.4112	-11.0687	5.41715e-15	7.64401e-14	23.7199
ENSG00000184867	ARMCX2	9823	Q7L311	ENSG00000184867_ARMCX2	1.12127	4.47342	11.0669	5.44761e-15	7.67898e-14	23.5759
ENSG00000267710	AC006116.20	NA	NA	ENSG00000267710_AC006116.20	3.98131	-1.23302	11.0563	5.63698e-15	7.92837e-14	23.7142
ENSG00000189410	SH2D5	400745	Q6ZV89	ENSG00000189410_SH2D5	3.27651	3.35317	11.0442	5.86018e-15	8.23562e-14	23.7145
ENSG00000198168	SVIP	258010	NA	ENSG00000198168_SVIP	-1.35706	4.72099	-11.0402	5.93691e-15	8.32995e-14	23.4417
ENSG00000186891	TNFRSF18	8784	Q9Y5U5	ENSG00000186891_TNFRSF18	-3.8311	-0.331312	-11.0399	5.94172e-15	8.32995e-14	23.7544
ENSG00000152931	PART1	25859	NA	ENSG00000152931_PART1	-2.96379	1.58814	-11.0312	6.1114e-15	8.55398e-14	23.8195
ENSG00000145777	TSLP	85480	A0A0C4DG43	ENSG00000145777_TSLP	2.5497	0.340182	11.0298	6.13896e-15	8.58563e-14	23.8135
ENSG00000154493	C10orf90	118611	H7C3F8	ENSG00000154493_C10orf90	-5.09549	-1.95113	-11.0265	6.20335e-15	8.66169e-14	23.5634
ENSG00000005513	SOX8	30812	P57073	ENSG00000005513_SOX8	-4.29407	-2.71594	-11.0209	6.3163e-15	8.81231e-14	23.4546
ENSG00000061337	LZTS1	11178	Q9Y250	ENSG00000061337_LZTS1	5.14866	1.85669	11.0187	6.36006e-15	8.86622e-14	23.7871
ENSG00000146192	FGD2	221472	NA	ENSG00000146192_FGD2	-3.80112	-2.32757	-11.0096	6.54961e-15	9.12313e-14	23.4986
ENSG00000144935	TRPC1	7220	P48995	ENSG00000144935_TRPC1	1.56373	3.25983	11.006	6.62541e-15	9.21389e-14	23.5649
ENSG00000175764	TTLL11	158135	NA	ENSG00000175764_TTLL11	1.69743	2.83714	11.0002	6.75209e-15	9.37502e-14	23.6035
ENSG00000104140	RHOV	171177	Q96L33	ENSG00000104140_RHOV	-4.45785	3.44634	-10.9985	6.78778e-15	9.41703e-14	23.6518
ENSG00000269019	AC005932.1	102724360	NA	ENSG00000269019_AC005932.1	1.86779	-0.422968	10.9856	7.07499e-15	9.79979e-14	23.6309
ENSG00000066468	FGFR2	2263	P21802	ENSG00000066468_FGFR2	1.71605	5.45343	10.9849	7.09301e-15	9.81669e-14	23.1948
ENSG00000111911	HINT3	135114	Q9NQE9	ENSG00000111911_HINT3	-1.04634	5.01698	-10.9846	7.09852e-15	9.81669e-14	23.2101
ENSG00000267325	LINC01415	NA	NA	ENSG00000267325_LINC01415	3.79741	-2.19998	10.9838	7.11736e-15	9.83471e-14	23.3687
ENSG00000065371	ROPN1	54763	Q9HAT0	ENSG00000065371_ROPN1	-4.82527	-1.00182	-10.9797	7.2124e-15	9.94244e-14	23.4782
ENSG00000104722	NEFM	4741	P07197	ENSG00000104722_NEFM	5.02417	1.68202	10.9772	7.26918e-15	1.00128e-13	23.6545
ENSG00000270157	RP5-894A10.6	NA	NA	ENSG00000270157_RP5-894A10.6	-1.44662	1.8958	-10.9758	7.30376e-15	1.00524e-13	23.6111
ENSG00000174514	MFSD4A	148808	A0A087WYZ8	ENSG00000174514_MFSD4A	-3.07752	-0.48299	-10.9703	7.43242e-15	1.02213e-13	23.5261
ENSG00000170899	GSTA4	2941	NA	ENSG00000170899_GSTA4	2.1137	3.79477	10.9685	7.47771e-15	1.02755e-13	23.372
ENSG00000137878	GCOM1	145781	NA	ENSG00000137878_GCOM1	-1.93665	-0.0670781	-10.9657	7.54515e-15	1.03599e-13	23.5939
ENSG00000196586	MYO6	4646	Q9UM54	ENSG00000196586_MYO6	-1.00893	7.1791	-10.9644	7.57529e-15	1.03931e-13	22.9464
ENSG00000137198	GMPR	2766	P36959	ENSG00000137198_GMPR	-2.82461	1.64525	-10.9506	7.92124e-15	1.08591e-13	23.5686
ENSG00000177076	ACER2	340485	Q5QJU3	ENSG00000177076_ACER2	1.39951	1.97602	10.9479	7.99141e-15	1.09467e-13	23.5071
ENSG00000197121	PGAP1	80055	Q75T13	ENSG00000197121_PGAP1	1.29642	4.57924	10.9435	8.10331e-15	1.10824e-13	23.123
ENSG00000215769	RP13-104F24.2	146880	NA	ENSG00000215769_RP13-104F24.2	-1.59821	3.3539	-10.9377	8.25817e-15	1.12764e-13	23.2992
ENSG00000006047	YBX2	51087	Q9Y2T7	ENSG00000006047_YBX2	-4.22835	0.0464957	-10.9333	8.37431e-15	1.1426e-13	23.4685
ENSG00000006534	ALDH3B1	221	P43353	ENSG00000006534_ALDH3B1	-1.73758	3.98327	-10.9219	8.68908e-15	1.18368e-13	23.2053
ENSG00000273478	RP11-465N4.5	NA	NA	ENSG00000273478_RP11-465N4.5	-3.06942	-0.806831	-10.919	8.77019e-15	1.19286e-13	23.3536
ENSG00000141404	GNAL	2774	P38405	ENSG00000141404_GNAL	3.2505	4.35135	10.9123	8.96179e-15	1.21796e-13	23.1889
ENSG00000162105	SHANK2	22941	E7EUA2	ENSG00000162105_SHANK2	-2.75898	4.23555	-10.9115	8.98594e-15	1.22028e-13	23.183
ENSG00000144136	SLC20A1	6574	Q8WUM9	ENSG00000144136_SLC20A1	1.41707	9.29051	10.9087	9.06865e-15	1.22959e-13	22.7199
ENSG00000041353	RAB27B	5874	K7ES41	ENSG00000041353_RAB27B	-1.32274	5.86027	-10.9054	9.16416e-15	1.24157e-13	22.8423
ENSG00000144824	PHLDB2	90102	Q86SQ0	ENSG00000144824_PHLDB2	1.17111	7.5324	10.9031	9.23454e-15	1.25013e-13	22.7307
ENSG00000184307	ZDHHC23	254887	Q8IYP9	ENSG00000184307_ZDHHC23	-1.13338	3.22469	-10.8983	9.3769e-15	1.26742e-13	23.2074
ENSG00000273297	RP11-38M8.1	NA	NA	ENSG00000273297_RP11-38M8.1	2.00248	-0.347331	10.8899	9.6369e-15	1.29952e-13	23.3392
ENSG00000116667	C1orf21	81563	Q9H246	ENSG00000116667_C1orf21	1.27983	5.57768	10.8861	9.75512e-15	1.31444e-13	22.8298
ENSG00000141542	RAB40B	10966	Q12829	ENSG00000141542_RAB40B	-1.59514	4.02504	-10.8847	9.79809e-15	1.3192e-13	23.0861
ENSG00000224260	RP1-272L16.1	NA	NA	ENSG00000224260_RP1-272L16.1	3.41195	-2.13689	10.8821	9.88291e-15	1.32959e-13	23.1597
ENSG00000131037	EPS8L1	54869	K7EN83	ENSG00000131037_EPS8L1	-1.63449	4.94775	-10.8738	1.01518e-14	1.36364e-13	22.8685
ENSG00000148700	ADD3	120	NA	ENSG00000148700_ADD3	-1.13236	6.86375	-10.8649	1.04479e-14	1.40233e-13	22.635
ENSG00000250685	RP11-486L19.2	NA	NA	ENSG00000250685_RP11-486L19.2	3.85027	-1.16496	10.8622	1.05378e-14	1.41331e-13	23.1756
ENSG00000143502	SUSD4	55061	Q5VX71	ENSG00000143502_SUSD4	-2.74557	1.92122	-10.8586	1.06629e-14	1.42787e-13	23.2499
ENSG00000183831	ANKRD45	339416	Q5TZF3	ENSG00000183831_ANKRD45	3.93885	-2.56251	10.845	1.1144e-14	1.49e-13	22.9084
ENSG00000103647	CORO2B	10391	Q9UQ03	ENSG00000103647_CORO2B	4.75762	1.22506	10.8397	1.13353e-14	1.5144e-13	23.2001
ENSG00000033170	FUT8	2530	Q9BYC5	ENSG00000033170_FUT8	1.02523	4.61938	10.8368	1.14441e-14	1.52777e-13	22.7995
ENSG00000135835	KIAA1614	57710	NA	ENSG00000135835_KIAA1614	2.79396	-0.930532	10.8299	1.1703e-14	1.55992e-13	23.0895
ENSG00000168060	NAALADL1	10004	H0YDS5	ENSG00000168060_NAALADL1	1.83463	0.770261	10.8215	1.20254e-14	1.5992e-13	23.1584
ENSG00000153993	SEMA3D	223117	O95025	ENSG00000153993_SEMA3D	2.17492	2.92914	10.8202	1.20758e-14	1.60468e-13	23.0136
ENSG00000088726	TMEM40	55287	Q8WWA1	ENSG00000088726_TMEM40	1.7165	4.59655	10.8179	1.21657e-14	1.61517e-13	22.7358
ENSG00000258483	AC144835.1	NA	NA	ENSG00000258483_AC144835.1	-3.96852	-2.77619	-10.8155	1.2262e-14	1.62443e-13	22.7771
ENSG00000168003	SLC3A2	6520	P08195	ENSG00000168003_SLC3A2	1.46336	8.75934	10.8139	1.23257e-14	1.63163e-13	22.4143
ENSG00000176170	SPHK1	8877	NA	ENSG00000176170_SPHK1	1.70976	5.95607	10.8116	1.24163e-14	1.64237e-13	22.5438
ENSG00000231638	AC011738.4	100506895	NA	ENSG00000231638_AC011738.4	3.92938	-0.798056	10.8019	1.28122e-14	1.69215e-13	23.004
ENSG00000149380	P4HA3	283208	NA	ENSG00000149380_P4HA3	2.26673	-1.11592	10.7979	1.29818e-14	1.71324e-13	22.9579
ENSG00000151789	ZNF385D	79750	Q9H6B1	ENSG00000151789_ZNF385D	1.63084	3.06826	10.7975	1.2997e-14	1.71394e-13	22.9432
ENSG00000188153	COL4A5	1287	NA	ENSG00000188153_COL4A5	1.24594	6.83722	10.7889	1.33642e-14	1.76103e-13	22.3855
ENSG00000170075	GPR37L1	9283	O60883	ENSG00000170075_GPR37L1	-3.55911	-1.75117	-10.7843	1.35649e-14	1.78205e-13	22.8478
ENSG00000153233	PTPRR	5801	Q15256	ENSG00000153233_PTPRR	-4.26306	-1.75109	-10.7826	1.36417e-14	1.79078e-13	22.8099
ENSG00000133943	C14orf159	80017	A0A0C4DGD8	ENSG00000133943_C14orf159	1.07152	4.23452	10.7757	1.39485e-14	1.82691e-13	22.6527
ENSG00000119698	PPP4R4	57718	G3V516	ENSG00000119698_PPP4R4	4.20399	-0.218143	10.7665	1.4375e-14	1.879e-13	22.9447
ENSG00000246090	RP11-696N14.1	100507053	NA	ENSG00000246090_RP11-696N14.1	1.57182	1.50719	10.7664	1.43788e-14	1.879e-13	22.956
ENSG00000229512	AC068580.5	NA	NA	ENSG00000229512_AC068580.5	-2.66164	-1.06567	-10.7468	1.53223e-14	1.99929e-13	22.8385
ENSG00000141441	GAREM1	64762	J3QRF3	ENSG00000141441_GAREM1	-1.20772	4.57136	-10.7444	1.54428e-14	2.0135e-13	22.501
ENSG00000053108	FSTL4	23105	Q6MZW2	ENSG00000053108_FSTL4	3.47901	-1.63866	10.7419	1.55701e-14	2.02704e-13	22.7515
ENSG00000174171	RP11-23P13.6	NA	NA	ENSG00000174171_RP11-23P13.6	-3.41195	1.81788	-10.7414	1.5593e-14	2.0285e-13	22.8868
ENSG00000101955	SRPX	8406	P78539	ENSG00000101955_SRPX	1.9076	5.40121	10.7374	1.5799e-14	2.05376e-13	22.389
ENSG00000148288	GBGT1	26301	Q8N5D6	ENSG00000148288_GBGT1	-2.16347	1.14135	-10.7341	1.5971e-14	2.07455e-13	22.883
ENSG00000067445	TRO	7216	B1AKF6	ENSG00000067445_TRO	4.13006	-1.14974	10.7235	1.65282e-14	2.14372e-13	22.6994
ENSG00000176401	EID2B	126272	Q96D98	ENSG00000176401_EID2B	1.40219	0.19046	10.7176	1.68524e-14	2.18414e-13	22.823
ENSG00000156509	FBXO43	286151	Q4G163	ENSG00000156509_FBXO43	2.42789	-0.853668	10.7103	1.72525e-14	2.23432e-13	22.7352
ENSG00000116285	ERRFI1	54206	K7ENI4	ENSG00000116285_ERRFI1	-1.19329	8.61834	-10.7084	1.73628e-14	2.24692e-13	22.0747
ENSG00000168907	PLA2G4F	255189	Q68DD2	ENSG00000168907_PLA2G4F	-2.82915	0.385098	-10.7067	1.74601e-14	2.25782e-13	22.7941
ENSG00000176402	GJC3	349149	Q8NFK1	ENSG00000176402_GJC3	-4.47256	-1.62886	-10.6987	1.7919e-14	2.31544e-13	22.5852
ENSG00000156413	FUT6	2528	P51993	ENSG00000156413_FUT6	-4.31608	-2.43645	-10.6959	1.80849e-14	2.33513e-13	22.4537
ENSG00000272931	RP5-943J3.2	NA	NA	ENSG00000272931_RP5-943J3.2	-3.6984	-1.67166	-10.679	1.91047e-14	2.46315e-13	22.5577
ENSG00000172817	CYP7B1	9420	NA	ENSG00000172817_CYP7B1	-2.452	1.42874	-10.676	1.92946e-14	2.48577e-13	22.6895
ENSG00000159433	STARD9	57519	NA	ENSG00000159433_STARD9	1.964	2.48305	10.6699	1.96855e-14	2.53237e-13	22.5806
ENSG00000136842	TMOD1	7111	P28289	ENSG00000136842_TMOD1	-5.62566	-0.00983613	-10.6659	1.99419e-14	2.56345e-13	22.5842
ENSG00000250889	LINC01336	104326191	NA	ENSG00000250889_LINC01336	2.82929	-2.32965	10.6593	2.03744e-14	2.61711e-13	22.4154
ENSG00000162409	PRKAA2	5563	P54646	ENSG00000162409_PRKAA2	-2.53253	3.73866	-10.6569	2.05326e-14	2.63547e-13	22.4088
ENSG00000154096	THY1	7070	P04216	ENSG00000154096_THY1	3.32596	3.94995	10.6539	2.07375e-14	2.65783e-13	22.4155
ENSG00000157557	ETS2	2114	P15036	ENSG00000157557_ETS2	1.06076	6.37652	10.649	2.10738e-14	2.69895e-13	21.9459
ENSG00000186642	PDE2A	5138	O00408	ENSG00000186642_PDE2A	2.97563	-1.84773	10.6477	2.11576e-14	2.70567e-13	22.4575
ENSG00000117595	IRF6	3664	O14896	ENSG00000117595_IRF6	1.08471	7.74529	10.6467	2.12315e-14	2.71312e-13	21.8867
ENSG00000133121	STARD13	90627	Q9Y3M8	ENSG00000133121_STARD13	-1.2402	4.74992	-10.6427	2.15095e-14	2.7446e-13	22.1524
ENSG00000261175	CTD-2015G9.2	NA	NA	ENSG00000261175_CTD-2015G9.2	-4.64961	0.420354	-10.6412	2.16144e-14	2.75595e-13	22.5388
ENSG00000114698	PLSCR4	57088	Q9NRQ2	ENSG00000114698_PLSCR4	-1.40925	3.61869	-10.6406	2.16551e-14	2.75911e-13	22.3198
ENSG00000203952	CCDC160	347475	A6NGH7	ENSG00000203952_CCDC160	-3.96525	-2.98084	-10.637	2.19098e-14	2.78746e-13	22.2322
ENSG00000141750	STAC2	342667	Q6ZMT1	ENSG00000141750_STAC2	-5.97434	-0.22328	-10.6333	2.21755e-14	2.81921e-13	22.4952
ENSG00000105784	RUNDC3B	154661	NA	ENSG00000105784_RUNDC3B	3.16185	-1.64714	10.6261	2.27097e-14	2.885e-13	22.369
ENSG00000260196	RP1-239B22.5	NA	NA	ENSG00000260196_RP1-239B22.5	1.92605	0.931797	10.6232	2.29213e-14	2.90975e-13	22.5196
ENSG00000124479	NDP	4693	Q00604	ENSG00000124479_NDP	-4.32294	-0.727643	-10.6219	2.30181e-14	2.9199e-13	22.4074
ENSG00000249852	AC145676.2	NA	NA	ENSG00000249852_AC145676.2	-3.21886	-3.35762	-10.6199	2.31741e-14	2.93753e-13	22.1357
ENSG00000106541	AGR2	10551	O95994	ENSG00000106541_AGR2	-4.53589	1.94802	-10.6183	2.329e-14	2.95007e-13	22.5023
ENSG00000186226	LCE1E	353135	Q5T753	ENSG00000186226_LCE1E	3.07229	-3.82327	10.6156	2.34951e-14	2.97387e-13	22.0537
ENSG00000135454	B4GALNT1	2583	NA	ENSG00000135454_B4GALNT1	2.95725	2.07353	10.6149	2.3552e-14	2.9789e-13	22.4721
ENSG00000086289	EPDR1	54749	D6RIH7	ENSG00000086289_EPDR1	3.94444	2.98013	10.6054	2.42941e-14	3.07052e-13	22.4153
ENSG00000092969	TGFB2	7042	P61812	ENSG00000092969_TGFB2	-1.76174	7.02353	-10.6032	2.44705e-14	3.0883e-13	21.7996
ENSG00000259120	SMIM6	100130933	P0DI80	ENSG00000259120_SMIM6	-3.23252	-3.57805	-10.5974	2.49371e-14	3.14491e-13	22.0227
ENSG00000070961	ATP2B1	490	P20020	ENSG00000070961_ATP2B1	1.01736	7.31012	10.5924	2.53527e-14	3.19499e-13	21.7184
ENSG00000269190	FBXO17	115290	M0QZ95	ENSG00000269190_FBXO17	1.43873	3.10912	10.5913	2.54444e-14	3.20422e-13	22.2074
ENSG00000169242	EFNA1	1942	P20827	ENSG00000169242_EFNA1	-1.5905	4.84112	-10.5887	2.56576e-14	3.22638e-13	21.9686
ENSG00000136305	CIDEB	27141	Q9UHD4	ENSG00000136305_CIDEB	1.48191	2.6714	10.5825	2.61836e-14	3.28536e-13	22.2444
ENSG00000070371	CLTCL1	8218	P53675	ENSG00000070371_CLTCL1	2.19148	2.77196	10.5786	2.65185e-14	3.32499e-13	22.2318
ENSG00000226508	AC104655.3	105373984	NA	ENSG00000226508_AC104655.3	3.36167	-2.66793	10.5736	2.69552e-14	3.37241e-13	22.0525
ENSG00000143341	HMCN1	83872	Q96RW7	ENSG00000143341_HMCN1	4.92791	3.88034	10.5716	2.71363e-14	3.39263e-13	22.2523
ENSG00000028277	POU2F2	5452	P09086	ENSG00000028277_POU2F2	3.35981	0.474371	10.5682	2.74397e-14	3.42809e-13	22.3448
ENSG00000076864	RAP1GAP	5909	X6R8W7	ENSG00000076864_RAP1GAP	-2.06797	0.738468	-10.5656	2.7669e-14	3.45423e-13	22.3427
ENSG00000120913	PDLIM2	64236	C9JSR2	ENSG00000120913_PDLIM2	-1.12323	4.71985	-10.5619	2.80087e-14	3.49162e-13	21.8542
ENSG00000130234	ACE2	59272	Q9BYF1	ENSG00000130234_ACE2	-4.91421	-0.779979	-10.5615	2.80474e-14	3.49393e-13	22.229
ENSG00000269495	CTB-147C22.8	NA	NA	ENSG00000269495_CTB-147C22.8	-2.61	0.862127	-10.5494	2.91825e-14	3.63272e-13	22.2897
ENSG00000260912	RP11-363E7.4	NA	NA	ENSG00000260912_RP11-363E7.4	1.45647	2.1616	10.5471	2.94013e-14	3.65732e-13	22.1974
ENSG00000111912	NCOA7	135112	Q8NI08	ENSG00000111912_NCOA7	-1.22035	7.09325	-10.5456	2.95491e-14	3.67307e-13	21.573
ENSG00000151468	CCDC3	83643	Q9BQI4	ENSG00000151468_CCDC3	5.04746	1.28563	10.5364	3.04501e-14	3.78236e-13	22.2378
ENSG00000204542	C6orf15	29113	Q6UXA7	ENSG00000204542_C6orf15	-6.47292	2.1546	-10.5313	3.09648e-14	3.84079e-13	22.2285
ENSG00000198477	NA	NA	NA	ENSG00000198477_NA	-3.18871	0.363745	-10.5278	3.13257e-14	3.88277e-13	22.1759
ENSG00000100979	PLTP	5360	P55058	ENSG00000100979_PLTP	1.89967	4.93408	10.525	3.16102e-14	3.91244e-13	21.7278
ENSG00000262601	NA	NA	NA	ENSG00000262601_NA	2.05544	-0.823729	10.5183	3.23088e-14	3.99035e-13	22.1514
ENSG00000100599	RIN3	79890	Q8TB24	ENSG00000100599_RIN3	-1.0384	5.30289	-10.5185	3.22925e-14	3.99035e-13	21.6415
ENSG00000174130	TLR6	10333	Q9Y2C9	ENSG00000174130_TLR6	-1.77969	3.92354	-10.5076	3.3465e-14	4.1214e-13	21.8845
ENSG00000242265	PEG10	23089	Q86TG7	ENSG00000242265_PEG10	1.81633	7.8703	10.5035	3.39187e-14	4.17431e-13	21.4291
ENSG00000027869	SH2D2A	9047	Q9NP31	ENSG00000027869_SH2D2A	2.76274	1.68123	10.4942	3.49701e-14	4.29761e-13	22.0771
ENSG00000197496	SLC2A10	81031	O95528	ENSG00000197496_SLC2A10	-3.73421	1.05704	-10.4805	3.65801e-14	4.48909e-13	22.0688
ENSG00000259658	RP11-89K11.1	NA	NA	ENSG00000259658_RP11-89K11.1	2.83273	-3.84056	10.4694	3.79318e-14	4.64182e-13	21.6261
ENSG00000156222	SLC28A1	9154	O00337	ENSG00000156222_SLC28A1	-4.60004	-2.60952	-10.4695	3.79255e-14	4.64182e-13	21.756
ENSG00000078900	TP73	7161	O15350	ENSG00000078900_TP73	3.34667	1.78789	10.4662	3.83421e-14	4.68541e-13	21.9845
ENSG00000186832	KRT16	3868	P08779	ENSG00000186832_KRT16	-2.25895	8.85442	-10.4651	3.84724e-14	4.69803e-13	21.2711
ENSG00000135919	SERPINE2	5270	P07093	ENSG00000135919_SERPINE2	1.92674	7.43853	10.4568	3.9541e-14	4.81833e-13	21.2745
ENSG00000110427	KIAA1549L	25758	H0YDE5	ENSG00000110427_KIAA1549L	2.16185	4.59331	10.4565	3.95765e-14	4.81927e-13	21.6152
ENSG00000070190	DAPP1	27071	J3KNB3	ENSG00000070190_DAPP1	-1.88013	4.32878	-10.4558	3.96704e-14	4.82731e-13	21.6153
ENSG00000150907	FOXO1	2308	NA	ENSG00000150907_FOXO1	1.40507	4.37527	10.4541	3.98899e-14	4.85062e-13	21.5853
ENSG00000170293	CMTM8	152189	Q8IZV2	ENSG00000170293_CMTM8	-1.38309	2.0743	-10.4451	4.1088e-14	4.98115e-13	21.8912
ENSG00000054219	LY75	4065	O60449	ENSG00000054219_LY75	-1.62623	4.07699	-10.4451	4.1087e-14	4.98115e-13	21.6096
ENSG00000215915	ATAD3C	219293	Q5T2N8	ENSG00000215915_ATAD3C	-2.08985	1.659	-10.445	4.11072e-14	4.98115e-13	21.9199
ENSG00000215788	TNFRSF25	8718	NA	ENSG00000215788_TNFRSF25	2.06038	3.78362	10.4447	4.1142e-14	4.98189e-13	21.5976
ENSG00000228944	AC004485.3	NA	NA	ENSG00000228944_AC004485.3	-3.26287	-3.89103	-10.4442	4.12146e-14	4.9872e-13	21.5417
ENSG00000115355	CCDC88A	55704	Q3V6T2	ENSG00000115355_CCDC88A	1.11994	6.66177	10.4438	4.1272e-14	4.99065e-13	21.2505
ENSG00000173926	2020-03-03	115123	Q86UD3	ENSG00000173926_MARCH3	-1.8449	1.4468	-10.4424	4.14642e-14	5.01041e-13	21.9243
ENSG00000180861	LINC01559	NA	NA	ENSG00000180861_LINC01559	-6.05143	-1.44864	-10.4417	4.15601e-14	5.01849e-13	21.7318
ENSG00000205221	VIT	5212	Q6UXI7	ENSG00000205221_VIT	4.40242	-2.23206	10.4378	4.2093e-14	5.0793e-13	21.6715
ENSG00000166473	PKD1L2	114780	NA	ENSG00000166473_PKD1L2	-4.09886	-0.436618	-10.4364	4.22876e-14	5.09923e-13	21.8497
ENSG00000139625	MAP3K12	7786	Q12852	ENSG00000139625_MAP3K12	1.65514	2.2987	10.4294	4.32685e-14	5.21026e-13	21.8356
ENSG00000130522	JUND	3727	P17535	ENSG00000130522_JUND	-1.00305	6.58805	-10.4272	4.35787e-14	5.24034e-13	21.2129
ENSG00000163485	ADORA1	134	P30542	ENSG00000163485_ADORA1	-4.52294	1.65574	-10.4274	4.35493e-14	5.24034e-13	21.897
ENSG00000178826	TMEM139	135932	Q8IV31	ENSG00000178826_TMEM139	-1.65331	4.30087	-10.4255	4.38272e-14	5.26655e-13	21.5253
ENSG00000266936	CTC-215O4.4	NA	NA	ENSG00000266936_CTC-215O4.4	-2.92771	-3.68217	-10.4203	4.45918e-14	5.35472e-13	21.4632
ENSG00000164574	GALNT10	55568	Q86SR1	ENSG00000164574_GALNT10	2.23353	5.22985	10.4175	4.49939e-14	5.39927e-13	21.3978
ENSG00000256164	CCND2-AS1	103752584	NA	ENSG00000256164_CCND2-AS1	2.90312	-3.03638	10.4148	4.54014e-14	5.44064e-13	21.5339
ENSG00000186193	SAPCD2	89958	Q86UD0	ENSG00000186193_SAPCD2	-1.65745	5.26937	-10.4149	4.53883e-14	5.44064e-13	21.3216
ENSG00000126368	NR1D1	9572	P20393	ENSG00000126368_NR1D1	1.74685	3.56357	10.414	4.55205e-14	5.45113e-13	21.6026
ENSG00000205592	MUC19	NA	NA	ENSG00000205592_MUC19	2.52501	-0.796114	10.4125	4.57422e-14	5.47146e-13	21.8148
ENSG00000171357	LURAP1	541468	Q96LR2	ENSG00000171357_LURAP1	1.13158	2.53146	10.4124	4.57534e-14	5.47146e-13	21.707
ENSG00000234476	RP11-496N12.6	NA	NA	ENSG00000234476_RP11-496N12.6	-3.3251	-3.26633	-10.412	4.58197e-14	5.47561e-13	21.5093
ENSG00000237515	SHISA9	729993	B4DS77	ENSG00000237515_SHISA9	-6.79478	1.91311	-10.4114	4.59077e-14	5.48235e-13	21.8323
ENSG00000169908	TM4SF1	4071	P30408	ENSG00000169908_TM4SF1	-1.50158	8.20178	-10.4074	4.6519e-14	5.55152e-13	21.089
ENSG00000109511	ANXA10	11199	Q9UJ72	ENSG00000109511_ANXA10	3.595	-2.69208	10.4037	4.7087e-14	5.61544e-13	21.6105
ENSG00000243232	PCDHAC2	56134	Q9Y5I4	ENSG00000243232_PCDHAC2	3.69882	-1.58843	10.3894	4.93616e-14	5.87861e-13	21.6668
ENSG00000069482	GAL	51083	NA	ENSG00000069482_GAL	-2.09548	3.04001	-10.3863	4.98592e-14	5.9338e-13	21.5753
ENSG00000272141	RP11-465B22.8	NA	NA	ENSG00000272141_RP11-465B22.8	-3.79607	-0.724057	-10.3766	5.14837e-14	6.11453e-13	21.6732
ENSG00000148737	TCF7L2	6934	Q9NQB0	ENSG00000148737_TCF7L2	-1.07913	5.57803	-10.3756	5.16616e-14	6.13145e-13	21.1499
ENSG00000143416	SELENBP1	8991	Q13228	ENSG00000143416_SELENBP1	-5.8525	1.01075	-10.3737	5.19796e-14	6.16497e-13	21.7117
ENSG00000254417	ANO1-AS2	NA	NA	ENSG00000254417_ANO1-AS2	3.36895	-2.94724	10.3697	5.26638e-14	6.24185e-13	21.3947
ENSG00000165821	SALL2	6297	Q9Y467	ENSG00000165821_SALL2	2.71376	1.1892	10.3694	5.27312e-14	6.24556e-13	21.7095
ENSG00000137094	DNAJB5	25822	O75953	ENSG00000137094_DNAJB5	2.31931	4.21373	10.3635	5.37689e-14	6.36413e-13	21.3548
ENSG00000167972	ABCA3	21	Q99758	ENSG00000167972_ABCA3	-4.866	1.71674	-10.355	5.52854e-14	6.53915e-13	21.6641
ENSG00000177551	NHLH2	4808	Q02577	ENSG00000177551_NHLH2	4.41948	-2.84991	10.3541	5.54497e-14	6.55411e-13	21.4133
ENSG00000166924	NYAP1	222950	Q6ZVC0	ENSG00000166924_NYAP1	3.03084	-0.472306	10.3535	5.55682e-14	6.56364e-13	21.6116
ENSG00000171388	APLN	8862	Q9ULZ1	ENSG00000171388_APLN	2.66059	1.50956	10.3369	5.86838e-14	6.9128e-13	21.5734
ENSG00000130707	ASS1	445	P00966	ENSG00000130707_ASS1	-1.71421	6.56787	-10.3341	5.92363e-14	6.9699e-13	20.9283
ENSG00000133256	PDE6B	5158	P35913	ENSG00000133256_PDE6B	-2.96264	-1.19791	-10.3339	5.92691e-14	6.9699e-13	21.5033
ENSG00000105649	RAB3A	5864	P20336	ENSG00000105649_RAB3A	-1.55357	1.05398	-10.3332	5.94047e-14	6.97875e-13	21.5866
ENSG00000157551	KCNJ15	3772	F8VW46	ENSG00000157551_KCNJ15	2.15368	3.78312	10.3327	5.95186e-14	6.98739e-13	21.3067
ENSG00000112294	ALDH5A1	7915	P51649	ENSG00000112294_ALDH5A1	-2.16649	2.20051	-10.3279	6.04572e-14	7.09277e-13	21.5093
ENSG00000221986	MYBPHL	343263	NA	ENSG00000221986_MYBPHL	2.94546	-2.67423	10.3261	6.08221e-14	7.13076e-13	21.3609
ENSG00000137261	KIAA0319	9856	Q5VV43	ENSG00000137261_KIAA0319	-3.99082	-1.90568	-10.3259	6.0873e-14	7.1319e-13	21.4542
ENSG00000243004	AC005062.2	NA	NA	ENSG00000243004_AC005062.2	-3.33305	-3.14909	-10.3228	6.14904e-14	7.19936e-13	21.2571
ENSG00000173237	C11orf86	254439	A6NJI1	ENSG00000173237_C11orf86	-3.72924	-2.1898	-10.3082	6.45336e-14	7.55056e-13	21.3122
ENSG00000204264	PSMB8	5696	NA	ENSG00000204264_PSMB8	-1.00356	5.68402	-10.2988	6.65593e-14	7.77707e-13	20.8851
ENSG00000064205	WISP2	8839	O76076	ENSG00000064205_WISP2	-4.60872	-0.921252	-10.2941	6.76052e-14	7.89395e-13	21.3827
ENSG00000160183	TMPRSS3	64699	NA	ENSG00000160183_TMPRSS3	-5.96677	0.441288	-10.2938	6.76824e-14	7.89765e-13	21.4201
ENSG00000188039	NWD1	284434	E5RJJ1	ENSG00000188039_NWD1	-2.17218	2.7516	-10.2814	7.05066e-14	8.21613e-13	21.3152
ENSG00000112796	ENPP5	59084	Q9UJA9	ENSG00000112796_ENPP5	-1.77349	3.25791	-10.2738	7.22961e-14	8.419e-13	21.2086
ENSG00000169991	IFFO2	126917	Q5TF58	ENSG00000169991_IFFO2	1.34763	7.25775	10.2725	7.26139e-14	8.45032e-13	20.6683
ENSG00000176678	FOXL1	2300	M0R279	ENSG00000176678_FOXL1	2.50017	2.0302	10.2713	7.29058e-14	8.4786e-13	21.3237
ENSG00000162636	FAM102B	284611	Q5T8I3	ENSG00000162636_FAM102B	-1.09363	5.36644	-10.2605	7.55506e-14	8.76852e-13	20.7697
ENSG00000115828	QPCT	25797	Q16769	ENSG00000115828_QPCT	-1.91561	4.155	-10.257	7.64311e-14	8.86478e-13	21.011
ENSG00000197647	ZNF433	163059	Q8N7K0	ENSG00000197647_ZNF433	-1.8185	1.16185	-10.2529	7.74786e-14	8.98026e-13	21.3164
ENSG00000144063	MALL	7851	Q13021	ENSG00000144063_MALL	-1.72009	2.98546	-10.2488	7.85517e-14	9.09856e-13	21.126
ENSG00000103227	LMF1	64788	Q96S06	ENSG00000103227_LMF1	-2.23425	2.07903	-10.2432	8.00078e-14	9.25484e-13	21.2422
ENSG00000267702	RP11-53B2.2	NA	NA	ENSG00000267702_RP11-53B2.2	-3.22077	-3.77636	-10.2378	8.14543e-14	9.41588e-13	20.9275
ENSG00000130830	MPP1	4354	Q00013	ENSG00000130830_MPP1	1.30239	2.25679	10.2349	8.22402e-14	9.49405e-13	21.1582
ENSG00000118513	MYB	4602	P10242	ENSG00000118513_MYB	-2.46695	2.0456	-10.2292	8.38062e-14	9.66197e-13	21.2114
ENSG00000148400	NOTCH1	4851	P46531	ENSG00000148400_NOTCH1	1.07899	7.35393	10.2283	8.40675e-14	9.68565e-13	20.5091
ENSG00000253408	RP11-231D20.2	101929897	NA	ENSG00000253408_RP11-231D20.2	2.51026	-1.69666	10.2267	8.45132e-14	9.73052e-13	21.1471
ENSG00000089723	OTUB2	78990	Q96DC9	ENSG00000089723_OTUB2	-1.34604	4.24694	-10.2213	8.60266e-14	9.89164e-13	20.8646
ENSG00000156966	B3GNT7	93010	Q8NFL0	ENSG00000156966_B3GNT7	-2.80017	1.93923	-10.2211	8.61073e-14	9.89219e-13	21.198
ENSG00000169085	C8orf46	254778	NA	ENSG00000169085_C8orf46	-3.64573	-2.28368	-10.2209	8.61456e-14	9.89219e-13	20.987
ENSG00000147614	ATP6V0D2	245972	E5RHJ7	ENSG00000147614_ATP6V0D2	-4.09257	-2.62859	-10.209	8.96236e-14	1.02847e-12	20.9121
ENSG00000007216	SLC13A2	9058	Q13183	ENSG00000007216_SLC13A2	-4.89613	-2.18293	-10.2045	9.09805e-14	1.04336e-12	20.9706
ENSG00000155085	AK9	221264	H7C517	ENSG00000155085_AK9	-1.42389	1.88812	-10.2035	9.12704e-14	1.0453e-12	21.0914
ENSG00000102243	VGLL1	51442	Q99990	ENSG00000102243_VGLL1	-5.94082	1.259	-10.1975	9.31091e-14	1.06565e-12	21.1415
ENSG00000115112	TFCP2L1	29842	Q9NZI6	ENSG00000115112_TFCP2L1	-1.51684	8.8921	-10.1922	9.47494e-14	1.08371e-12	20.356
ENSG00000166821	PEX11A	8800	NA	ENSG00000166821_PEX11A	-1.17097	3.46699	-10.1837	9.74598e-14	1.11251e-12	20.832
ENSG00000172789	HOXC5	3222	Q00444	ENSG00000172789_HOXC5	3.05426	-2.43009	10.1761	9.99732e-14	1.1382e-12	20.8975
ENSG00000231666	RP11-404O13.1	646268	NA	ENSG00000231666_RP11-404O13.1	3.10168	-2.82652	10.1689	1.02383e-13	1.16487e-12	20.8491
ENSG00000270168	LA16c-380H5.3	NA	A0A0J9YXV3	ENSG00000270168_LA16c-380H5.3	-3.47228	0.0127263	-10.1683	1.02591e-13	1.16647e-12	21.0359
ENSG00000164823	OSGIN2	734	Q9Y236	ENSG00000164823_OSGIN2	-1.26506	6.05408	-10.1675	1.02866e-13	1.16883e-12	20.4027
ENSG00000186081	KRT5	3852	P13647	ENSG00000186081_KRT5	1.02832	13.2335	10.1619	1.0478e-13	1.18746e-12	20.2722
ENSG00000179817	MRGPRX4	117196	Q96LA9	ENSG00000179817_MRGPRX4	3.65622	-1.93791	10.1599	1.05501e-13	1.19485e-12	20.8716
ENSG00000101470	TNNC2	7125	P02585	ENSG00000101470_TNNC2	-3.35652	-2.42583	-10.1573	1.06395e-13	1.20418e-12	20.8163
ENSG00000138472	GUCA1C	9626	C9JNI2	ENSG00000138472_GUCA1C	3.35544	-3.50354	10.154	1.0758e-13	1.21522e-12	20.6631
ENSG00000204420	C6orf25	80739	NA	ENSG00000204420_C6orf25	-3.06685	-2.24966	-10.1483	1.09624e-13	1.2367e-12	20.8604
ENSG00000185156	MFSD6L	162387	Q8IWD5	ENSG00000185156_MFSD6L	-4.19492	-2.87797	-10.1395	1.12909e-13	1.27129e-12	20.6924
ENSG00000114547	ROPN1B	152015	Q9BZX4	ENSG00000114547_ROPN1B	-4.97542	-1.27755	-10.1395	1.1291e-13	1.27129e-12	20.8224
ENSG00000181773	GPR3	2827	P46089	ENSG00000181773_GPR3	1.65106	0.78351	10.1346	1.14754e-13	1.29037e-12	20.938
ENSG00000165621	OXGR1	27199	Q96P68	ENSG00000165621_OXGR1	-4.76714	-2.40196	-10.1314	1.1596e-13	1.30224e-12	20.7111
ENSG00000214128	TMEM213	155006	A2RRL7	ENSG00000214128_TMEM213	-4.80232	-1.6399	-10.1172	1.21593e-13	1.36109e-12	20.7473
ENSG00000077274	CAPN6	827	Q9Y6Q1	ENSG00000077274_CAPN6	3.49525	1.96698	10.1021	1.2787e-13	1.42858e-12	20.8123
ENSG00000103257	SLC7A5	8140	A0A0C4DGL4	ENSG00000103257_SLC7A5	1.63381	10.6637	10.0961	1.3042e-13	1.45613e-12	20.0284
ENSG00000172382	PRSS27	83886	Q9BQR3	ENSG00000172382_PRSS27	-4.73517	0.744348	-10.094	1.31351e-13	1.46558e-12	20.8035
ENSG00000156453	PCDH1	5097	Q08174	ENSG00000156453_PCDH1	-1.86509	6.15572	-10.091	1.32672e-13	1.47937e-12	20.1355
ENSG00000136205	TNS3	64759	H7BZ64	ENSG00000136205_TNS3	-1.40052	6.77849	-10.0891	1.33517e-13	1.48688e-12	20.084
ENSG00000116016	EPAS1	2034	NA	ENSG00000116016_EPAS1	1.14511	7.97286	10.0843	1.35686e-13	1.5091e-12	20.0062
ENSG00000253671	RP11-806O11.1	NA	NA	ENSG00000253671_RP11-806O11.1	-3.84115	-2.47043	-10.0835	1.36009e-13	1.51172e-12	20.5732
ENSG00000113369	ARRDC3	57561	Q96B67	ENSG00000113369_ARRDC3	-1.11912	6.89136	-10.0788	1.38198e-13	1.53407e-12	20.0252
ENSG00000120471	TP53AIP1	63970	Q9HCN2	ENSG00000120471_TP53AIP1	3.50332	1.79022	10.0783	1.38392e-13	1.53525e-12	20.7301
ENSG00000241322	CDRT1	374286	K7ER72	ENSG00000241322_CDRT1	-3.28597	-0.880454	-10.0779	1.38577e-13	1.53632e-12	20.7144
ENSG00000188766	SPRED3	399473	K7EPU5	ENSG00000188766_SPRED3	1.91628	-0.175995	10.0772	1.38908e-13	1.539e-12	20.7521
ENSG00000213398	LCAT	3931	P04180	ENSG00000213398_LCAT	1.36923	2.0929	10.0733	1.40738e-13	1.55828e-12	20.6151
ENSG00000074855	ANO8	57719	M0QYD2	ENSG00000074855_ANO8	-1.02408	4.3451	-10.0725	1.41097e-13	1.56126e-12	20.3197
ENSG00000203697	CAPN8	388743	H0YEQ4	ENSG00000203697_CAPN8	-4.45502	1.83845	-10.0715	1.41577e-13	1.56557e-12	20.6985
ENSG00000136840	ST6GALNAC4	27090	Q9H4F1	ENSG00000136840_ST6GALNAC4	-1.12277	5.1657	-10.0711	1.41769e-13	1.56569e-12	20.1728
ENSG00000109339	MAPK10	5602	P53779	ENSG00000109339_MAPK10	3.93298	-0.00345687	10.0685	1.42994e-13	1.57821e-12	20.7025
ENSG00000245904	RP11-796E2.4	NA	NA	ENSG00000245904_RP11-796E2.4	-2.75634	-0.0391305	-10.0678	1.43351e-13	1.58115e-12	20.7158
ENSG00000187498	COL4A1	1282	P02462	ENSG00000187498_COL4A1	1.48474	7.28686	10.0641	1.45139e-13	1.59884e-12	19.9785
ENSG00000254148	NA	NA	NA	ENSG00000254148_NA	-5.24975	-0.0759392	-10.0571	1.4852e-13	1.63401e-12	20.6496
ENSG00000182950	ODF3L1	161753	Q8IXM7	ENSG00000182950_ODF3L1	3.14983	-3.41672	10.052	1.51102e-13	1.6603e-12	20.3687
ENSG00000123388	HOXC11	3227	O43248	ENSG00000123388_HOXC11	-1.91778	1.46049	-10.0501	1.52073e-13	1.66992e-12	20.6376
ENSG00000143036	SLC44A3	126969	Q8N4M1	ENSG00000143036_SLC44A3	-1.87023	3.25071	-10.047	1.53655e-13	1.68621e-12	20.4387
ENSG00000257698	RP11-620J15.3	NA	NA	ENSG00000257698_RP11-620J15.3	2.30131	-0.322056	10.0452	1.5458e-13	1.69529e-12	20.624
ENSG00000184305	CCSER1	401145	Q9C0I3	ENSG00000184305_CCSER1	-1.95835	1.50256	-10.041	1.56757e-13	1.7159e-12	20.6136
ENSG00000163531	NFASC	23114	NA	ENSG00000163531_NFASC	3.90221	2.50644	10.0392	1.57682e-13	1.72494e-12	20.5834
ENSG00000042980	ADAM28	10863	Q9UKQ2	ENSG00000042980_ADAM28	-3.53313	-0.798463	-10.0308	1.62152e-13	1.77049e-12	20.5758
ENSG00000082929	LINC01587	10141	NA	ENSG00000082929_LINC01587	-3.89252	-2.6342	-10.0297	1.62747e-13	1.77587e-12	20.373
ENSG00000226738	CTA-384D8.31	NA	NA	ENSG00000226738_CTA-384D8.31	-3.5675	-3.45647	-10.0268	1.6434e-13	1.79213e-12	20.2948
ENSG00000116014	KISS1R	84634	K7EQ45	ENSG00000116014_KISS1R	-3.84378	-2.88588	-10.0256	1.65014e-13	1.79834e-12	20.3925
ENSG00000122136	OBP2A	29991	F5H159	ENSG00000122136_OBP2A	-4.28815	-2.9104	-10.0228	1.66577e-13	1.81424e-12	20.3203
ENSG00000225511	LINC00475	NA	NA	ENSG00000225511_LINC00475	-2.08135	-1.67179	-10.0188	1.68815e-13	1.83746e-12	20.4646
ENSG00000152766	ANKRD22	118932	Q5VYY1	ENSG00000152766_ANKRD22	-1.76768	2.94409	-10.018	1.69231e-13	1.84083e-12	20.353
ENSG00000053747	LAMA3	3909	Q16787	ENSG00000053747_LAMA3	1.65578	10.3747	10.0089	1.74475e-13	1.89548e-12	19.7336
ENSG00000163817	SLC6A20	54716	Q9NP91	ENSG00000163817_SLC6A20	-5.23978	-2.04155	-10.0008	1.79253e-13	1.94617e-12	20.3377
ENSG00000130649	CYP2E1	1571	P05181	ENSG00000130649_CYP2E1	-3.79075	-1.16196	-9.99988	1.79814e-13	1.95105e-12	20.456
ENSG00000196460	RFX8	731220	E9PDA6	ENSG00000196460_RFX8	3.56337	-1.52279	9.99664	1.81776e-13	1.96987e-12	20.4051
ENSG00000182568	SATB1	6304	Q01826	ENSG00000182568_SATB1	-2.43797	2.54855	-9.99672	1.81728e-13	1.96987e-12	20.3892
ENSG00000206337	HCP5	10866	NA	ENSG00000206337_HCP5	-2.04674	3.40646	-9.99037	1.85624e-13	2.01031e-12	20.2464
ENSG00000197506	SLC28A3	64078	Q9HAS3	ENSG00000197506_SLC28A3	-5.71962	1.28305	-9.98955	1.86132e-13	2.01455e-12	20.4674
ENSG00000260833	NA	NA	NA	ENSG00000260833_NA	3.38609	-3.18468	9.98931	1.8628e-13	2.01489e-12	20.2129
ENSG00000145569	FAM105A	54491	Q9NUU6	ENSG00000145569_FAM105A	1.90839	-0.1888	9.98689	1.87796e-13	2.02876e-12	20.4584
ENSG00000224460	RP11-439L18.2	NA	NA	ENSG00000224460_RP11-439L18.2	2.11532	-1.61638	9.98305	1.90225e-13	2.05372e-12	20.3639
ENSG00000124134	KCNS1	3787	Q96KK3	ENSG00000124134_KCNS1	-2.37528	2.41078	-9.96476	2.02226e-13	2.17786e-12	20.2965
ENSG00000139209	SLC38A4	55089	Q969I6	ENSG00000139209_SLC38A4	3.6082	-1.57067	9.96074	2.04968e-13	2.20465e-12	20.2988
ENSG00000260947	RP11-384P7.7	NA	NA	ENSG00000260947_RP11-384P7.7	4.39305	-2.59903	9.95872	2.06355e-13	2.216e-12	20.1896
ENSG00000204540	PSORS1C1	170679	NA	ENSG00000204540_PSORS1C1	-1.76661	1.68328	-9.95876	2.06328e-13	2.216e-12	20.2628
ENSG00000105643	ARRDC2	27106	Q8TBH0	ENSG00000105643_ARRDC2	-1.29558	3.41184	-9.95535	2.087e-13	2.23923e-12	20.0995
ENSG00000100077	GRK3	157	P35626	ENSG00000100077_GRK3	1.16857	4.85845	9.95405	2.09605e-13	2.24755e-12	19.8088
ENSG00000054793	ATP9A	10079	A0A0A0MR22	ENSG00000054793_ATP9A	-1.93248	5.50491	-9.93211	2.25591e-13	2.41299e-12	19.7151
ENSG00000269855	RNF225	646862	M0QZC1	ENSG00000269855_RNF225	-3.92397	-1.35332	-9.92838	2.28427e-13	2.43805e-12	20.1739
ENSG00000167601	AXL	558	P30530	ENSG00000167601_AXL	1.89601	6.82639	9.92731	2.29249e-13	2.44457e-12	19.5306
ENSG00000160712	IL6R	3570	P08887	ENSG00000160712_IL6R	1.43612	5.22813	9.92424	2.31619e-13	2.46529e-12	19.656
ENSG00000087303	NID2	22795	Q14112	ENSG00000087303_NID2	2.47314	5.28097	9.91832	2.36263e-13	2.51318e-12	19.7461
ENSG00000214548	MEG3	55384	NA	ENSG00000214548_MEG3	3.78344	3.94694	9.91251	2.4091e-13	2.55633e-12	19.9112
ENSG00000008513	ST3GAL1	6482	Q11201	ENSG00000008513_ST3GAL1	-1.31728	5.91789	-9.90958	2.43283e-13	2.57993e-12	19.5381
ENSG00000064300	NGFR	4804	P08138	ENSG00000064300_NGFR	5.65909	4.00003	9.90383	2.48023e-13	2.62859e-12	20.0665
ENSG00000137673	MMP7	4316	P09237	ENSG00000137673_MMP7	-6.72575	4.69158	-9.90315	2.48592e-13	2.633e-12	20.0455
ENSG00000130508	PXDN	7837	Q92626	ENSG00000130508_PXDN	-1.6056	8.04309	-9.9002	2.51058e-13	2.6575e-12	19.3947
ENSG00000057149	SERPINB3	6317	P29508	ENSG00000057149_SERPINB3	-3.05297	5.5342	-9.89253	2.57599e-13	2.72341e-12	19.5903
ENSG00000154080	CHST9	83539	Q7L1S5	ENSG00000154080_CHST9	-4.18416	-2.02798	-9.88784	2.61687e-13	2.76326e-12	19.942
ENSG00000117115	PADI2	11240	Q9Y2J8	ENSG00000117115_PADI2	-6.49304	3.48528	-9.87319	2.74882e-13	2.89377e-12	20.0517
ENSG00000168135	KCNJ4	3761	P48050	ENSG00000168135_KCNJ4	-5.22274	-2.46497	-9.8716	2.76354e-13	2.90574e-12	19.9083
ENSG00000223547	ZNF844	284391	Q08AG5	ENSG00000223547_ZNF844	-3.39074	0.151656	-9.86834	2.79395e-13	2.93593e-12	20.0668
ENSG00000136002	ARHGEF4	50649	E7EV07	ENSG00000136002_ARHGEF4	1.67205	5.72265	9.86084	2.86517e-13	3.00713e-12	19.3822
ENSG00000183770	FOXL2	668	P58012	ENSG00000183770_FOXL2	3.6303	-1.65932	9.85425	2.9293e-13	3.07222e-12	19.9136
ENSG00000205220	PSMB10	5699	P40306	ENSG00000205220_PSMB10	-1.49318	2.3358	-9.85411	2.93073e-13	3.07222e-12	19.8968
ENSG00000121957	GPSM2	29899	P81274	ENSG00000121957_GPSM2	1.15402	6.49882	9.84387	3.03324e-13	3.17775e-12	19.2507
ENSG00000168702	LRP1B	53353	Q9NZR2	ENSG00000168702_LRP1B	-5.20306	0.825846	-9.8416	3.05652e-13	3.19827e-12	19.9717
ENSG00000167703	SLC43A2	124935	Q8N370	ENSG00000167703_SLC43A2	-1.53022	5.54906	-9.83749	3.09902e-13	3.23883e-12	19.3652
ENSG00000139626	ITGB7	3695	P26010	ENSG00000139626_ITGB7	-2.358	0.82636	-9.83013	3.17668e-13	3.316e-12	19.9329
ENSG00000157510	AFAP1L1	134265	NA	ENSG00000157510_AFAP1L1	1.16584	4.91668	9.82457	3.23664e-13	3.37655e-12	19.3641
ENSG00000268307	CTD-2619J13.13	NA	NA	ENSG00000268307_CTD-2619J13.13	-3.73413	-2.04056	-9.81712	3.31879e-13	3.45601e-12	19.7608
ENSG00000259886	NA	NA	NA	ENSG00000259886_NA	2.13092	0.395939	9.81646	3.32618e-13	3.46162e-12	19.9018
ENSG00000185070	FLRT2	23768	O43155	ENSG00000185070_FLRT2	2.45323	5.16272	9.80971	3.40249e-13	3.53679e-12	19.3571
ENSG00000245080	MIR3150B	105375650	NA	ENSG00000245080_MIR3150B	-3.28829	-3.48891	-9.80905	3.41009e-13	3.54257e-12	19.6216
ENSG00000134769	DTNA	1837	Q9Y4J8	ENSG00000134769_DTNA	-1.98562	3.26887	-9.80671	3.43706e-13	3.56845e-12	19.6424
ENSG00000229891	LINC01315	102723775	NA	ENSG00000229891_LINC01315	-2.2825	0.311096	-9.80318	3.47811e-13	3.60891e-12	19.8596
ENSG00000189157	FAM47E	100129583	Q6ZV65	ENSG00000189157_FAM47E	-3.45744	-2.03341	-9.80289	3.48152e-13	3.61028e-12	19.7281
ENSG00000127954	STEAP4	79689	Q687X5	ENSG00000127954_STEAP4	-4.75831	3.62289	-9.78197	3.73555e-13	3.86445e-12	19.5983
ENSG00000226237	GAS1RR	100506834	NA	ENSG00000226237_GAS1RR	3.547	-2.92189	9.77919	3.77079e-13	3.89858e-12	19.5755
ENSG00000135697	BCO1	53630	Q9HAY6	ENSG00000135697_BCO1	-3.38003	-2.68222	-9.77745	3.79294e-13	3.91915e-12	19.583
ENSG00000135299	ANKRD6	22881	Q9Y2G4	ENSG00000135299_ANKRD6	1.31847	3.78215	9.77689	3.80008e-13	3.92218e-12	19.4316
ENSG00000184588	PDE4B	5142	Q07343	ENSG00000184588_PDE4B	-4.2057	3.53963	-9.77686	3.80041e-13	3.92218e-12	19.5831
ENSG00000226562	CYP4F26P	NA	NA	ENSG00000226562_CYP4F26P	3.80394	-2.20781	9.77631	3.80748e-13	3.92714e-12	19.6553
ENSG00000188001	TPRG1	285386	Q6ZUI0	ENSG00000188001_TPRG1	2.68449	-0.122435	9.76705	3.92819e-13	4.04683e-12	19.735
ENSG00000181513	ACBD4	79777	NA	ENSG00000181513_ACBD4	-1.32025	2.7069	-9.76578	3.94504e-13	4.06178e-12	19.564
ENSG00000233705	SLC26A4-AS1	286002	NA	ENSG00000233705_SLC26A4-AS1	-3.04759	-2.46711	-9.76294	3.98293e-13	4.09835e-12	19.5498
ENSG00000159263	SIM2	6493	NA	ENSG00000159263_SIM2	-5.42899	-1.62504	-9.7626	3.98755e-13	4.10067e-12	19.6044
ENSG00000176659	C20orf197	NA	NA	ENSG00000176659_C20orf197	4.15057	-2.05195	9.76105	4.00832e-13	4.11919e-12	19.6206
ENSG00000108932	SLC16A6	9120	O15403	ENSG00000108932_SLC16A6	-3.84703	-2.04601	-9.75631	4.07297e-13	4.18107e-12	19.5814
ENSG00000114631	PODXL2	50512	Q9NZ53	ENSG00000114631_PODXL2	-2.14537	1.94905	-9.75211	4.13105e-13	4.23567e-12	19.6206
ENSG00000214870	AC004540.5	NA	NA	ENSG00000214870_AC004540.5	-3.31124	-2.39602	-9.75222	4.12946e-13	4.23567e-12	19.5159
ENSG00000168961	LGALS9	3965	O00182	ENSG00000168961_LGALS9	-3.69395	-0.387953	-9.73306	4.40518e-13	4.51407e-12	19.6108
ENSG00000169715	MT1E	4493	P04732	ENSG00000169715_MT1E	1.74075	6.90809	9.73255	4.41276e-13	4.51916e-12	18.855
ENSG00000184949	FAM227A	646851	NA	ENSG00000184949_FAM227A	-1.96278	1.97508	-9.73148	4.4287e-13	4.53282e-12	19.5475
ENSG00000124191	TOX2	84969	Q96NM4	ENSG00000124191_TOX2	3.7567	0.9377	9.7273	4.4916e-13	4.58906e-12	19.6093
ENSG00000233930	KRTAP5-AS1	338651	NA	ENSG00000233930_KRTAP5-AS1	-4.56578	-2.2799	-9.72505	4.52583e-13	4.61858e-12	19.4485
ENSG00000186212	SOWAHB	345079	A6NEL2	ENSG00000186212_SOWAHB	-4.19265	0.999517	-9.72321	4.55406e-13	4.64466e-12	19.5951
ENSG00000185338	SOCS1	8651	O15524	ENSG00000185338_SOCS1	2.3165	0.323573	9.7229	4.55876e-13	4.64672e-12	19.5941
ENSG00000148180	GSN	2934	NA	ENSG00000148180_GSN	-1.49844	8.1009	-9.72068	4.59313e-13	4.679e-12	18.7838
ENSG00000059804	SLC2A3	6515	P11169	ENSG00000059804_SLC2A3	2.77794	3.04563	9.71801	4.63468e-13	4.71855e-12	19.3502
ENSG00000259354	RP11-519G16.3	NA	NA	ENSG00000259354_RP11-519G16.3	-3.05743	-3.43789	-9.71493	4.68316e-13	4.76231e-12	19.2911
ENSG00000136653	NA	NA	NA	ENSG00000136653_NA	-1.34868	3.56703	-9.70903	4.77723e-13	4.85228e-12	19.1972
ENSG00000106025	TSPAN12	23554	O95859	ENSG00000106025_TSPAN12	-2.61211	0.962129	-9.70705	4.8094e-13	4.88209e-12	19.5389
ENSG00000113070	HBEGF	1839	Q99075	ENSG00000113070_HBEGF	1.31548	5.6146	9.70523	4.83903e-13	4.9093e-12	18.8634
ENSG00000235098	ANKRD65	441869	E5RJM6	ENSG00000235098_ANKRD65	1.44659	2.28033	9.70413	4.85705e-13	4.92181e-12	19.3769
ENSG00000099957	P2RX6	9127	NA	ENSG00000099957_P2RX6	3.8588	-0.839729	9.70368	4.86446e-13	4.92644e-12	19.492
ENSG00000101230	ISM1	140862	B1AKI9	ENSG00000101230_ISM1	4.14522	0.880464	9.69955	4.93271e-13	4.98973e-12	19.5161
ENSG00000144045	DQX1	165545	H7BZE3	ENSG00000144045_DQX1	3.37738	-0.469454	9.68256	5.22413e-13	5.2722e-12	19.4431
ENSG00000170439	METTL7B	196410	Q6UX53	ENSG00000170439_METTL7B	-3.97181	-1.8836	-9.68212	5.23197e-13	5.27397e-12	19.3497
ENSG00000182919	C11orf54	28970	Q9H0W9	ENSG00000182919_C11orf54	-1.24775	3.77704	-9.67953	5.27786e-13	5.31714e-12	19.1082
ENSG00000155367	PPM1J	333926	S4R3I3	ENSG00000155367_PPM1J	1.14647	1.67568	9.676	5.34127e-13	5.3779e-12	19.3551
ENSG00000259107	LINC00911	100996280	NA	ENSG00000259107_LINC00911	2.738	-3.36515	9.67381	5.38096e-13	5.4147e-12	19.2006
ENSG00000181804	SLC9A9	285195	Q8IVB4	ENSG00000181804_SLC9A9	2.22862	1.46761	9.67327	5.39075e-13	5.42142e-12	19.3753
ENSG00000170801	HTRA3	94031	P83110	ENSG00000170801_HTRA3	3.3827	-2.83494	9.67065	5.43873e-13	5.4651e-12	19.1988
ENSG00000176945	MUC20	200958	Q8N307	ENSG00000176945_MUC20	-4.78617	-0.0504148	-9.66784	5.49057e-13	5.5122e-12	19.3828
ENSG00000115556	PLCD4	84812	Q9BRC7	ENSG00000115556_PLCD4	3.23489	0.820523	9.66217	5.59703e-13	5.60933e-12	19.3866
ENSG00000157992	KRTCAP3	200634	Q53RY4	ENSG00000157992_KRTCAP3	-1.09392	4.22227	-9.66144	5.6107e-13	5.61978e-12	18.9347
ENSG00000091972	CD200	4345	U3KQQ2	ENSG00000091972_CD200	4.62654	-0.733273	9.66061	5.62653e-13	5.63238e-12	19.3245
ENSG00000108684	ASIC2	40	Q16515	ENSG00000108684_ASIC2	3.26838	-2.92976	9.6555	5.72455e-13	5.72059e-12	19.1899
ENSG00000115414	FN1	2335	P02751	ENSG00000115414_FN1	3.65736	10.0663	9.63898	6.05368e-13	6.02214e-12	18.5065
ENSG00000261857	MIA	8190	M0R343	ENSG00000261857_MIA	-2.39499	1.28443	-9.63893	6.05477e-13	6.02214e-12	19.299
ENSG00000167780	SOAT2	8435	F8VPE9	ENSG00000167780_SOAT2	2.98039	-3.18088	9.63668	6.10113e-13	6.06195e-12	19.0945
ENSG00000155846	PPARGC1B	133522	Q86YN6	ENSG00000155846_PPARGC1B	1.07295	4.39536	9.63536	6.12847e-13	6.08214e-12	18.7754
ENSG00000230978	LINC00160	54064	NA	ENSG00000230978_LINC00160	-2.9208	-3.71982	-9.63128	6.21357e-13	6.16306e-12	19.0402
ENSG00000154227	CERS3	204219	Q8IU89	ENSG00000154227_CERS3	3.66109	2.55278	9.62899	6.26199e-13	6.20754e-12	19.1894
ENSG00000169247	SH3TC2	79628	E9PDF1	ENSG00000169247_SH3TC2	-1.17974	5.5491	-9.62294	6.39154e-13	6.32872e-12	18.5994
ENSG00000196569	LAMA2	3908	P24043	ENSG00000196569_LAMA2	1.44155	0.552772	9.62194	6.41333e-13	6.34667e-12	19.2462
ENSG00000162511	LAPTM5	7805	Q13571	ENSG00000162511_LAPTM5	3.72262	0.546213	9.61991	6.45747e-13	6.38306e-12	19.2537
ENSG00000188501	LCTL	197021	Q6UWM7	ENSG00000188501_LCTL	-2.79006	0.620274	-9.61827	6.49338e-13	6.4149e-12	19.248
ENSG00000188660	LINC00319	284836	NA	ENSG00000188660_LINC00319	2.87512	-2.61309	9.61003	6.67722e-13	6.58525e-12	19.0569
ENSG00000131398	KCNC3	3748	E7ETH1	ENSG00000131398_KCNC3	-5.04002	-0.13486	-9.60557	6.77894e-13	6.68176e-12	19.1794
ENSG00000162755	KLHDC9	126823	NA	ENSG00000162755_KLHDC9	-1.5656	-0.00644665	-9.60397	6.81565e-13	6.71413e-12	19.1999
ENSG00000078804	TP53INP2	58476	Q8IXH6	ENSG00000078804_TP53INP2	-2.34522	4.32782	-9.60269	6.84541e-13	6.73962e-12	18.7992
ENSG00000107099	DOCK8	81704	F8WC95	ENSG00000107099_DOCK8	-2.19241	4.12851	-9.59255	7.0848e-13	6.96344e-12	18.7305
ENSG00000076641	PAG1	55824	Q9NWQ8	ENSG00000076641_PAG1	3.33689	0.640117	9.58247	7.33097e-13	7.19315e-12	19.1181
ENSG00000101746	NOL4	8715	O94818	ENSG00000101746_NOL4	-4.38083	-1.75879	-9.57871	7.425e-13	7.27306e-12	19.0049
ENSG00000233608	TWIST2	117581	Q8WVJ9	ENSG00000233608_TWIST2	1.72418	1.36613	9.57701	7.46805e-13	7.30696e-12	19.0162
ENSG00000243384	RP11-475O23.2	NA	NA	ENSG00000243384_RP11-475O23.2	-3.31876	-3.64138	-9.57716	7.46427e-13	7.30696e-12	18.8475
ENSG00000178726	THBD	7056	P07204	ENSG00000178726_THBD	3.0415	3.12603	9.57591	7.49597e-13	7.33014e-12	18.8661
ENSG00000160223	ICOSLG	102723996	O75144	ENSG00000160223_ICOSLG	1.13864	3.62975	9.5711	7.61925e-13	7.4423e-12	18.7337
ENSG00000175445	LPL	4023	E7EW14	ENSG00000175445_LPL	-6.23961	2.22109	-9.57001	7.64751e-13	7.46569e-12	19.0881
ENSG00000116711	PLA2G4A	5321	P47712	ENSG00000116711_PLA2G4A	1.18529	5.23406	9.56262	7.84161e-13	7.64226e-12	18.4099
ENSG00000117983	MUC5B	727897	NA	ENSG00000117983_MUC5B	-6.97055	1.43519	-9.549	8.21269e-13	7.99941e-12	18.9982
ENSG00000121440	PDZRN3	23024	H7C566	ENSG00000121440_PDZRN3	2.50123	2.64382	9.54493	8.32701e-13	8.10621e-12	18.8755
ENSG00000185479	KRT6B	3854	P04259	ENSG00000185479_KRT6B	-1.0666	10.5673	-9.54455	8.3377e-13	8.11205e-12	18.1565
ENSG00000237413	MGC27382	149047	NA	ENSG00000237413_MGC27382	-3.66915	-3.39723	-9.53942	8.48405e-13	8.24981e-12	18.7688
ENSG00000187609	EXD3	54932	E9PSB6	ENSG00000187609_EXD3	-1.02959	2.77863	-9.53907	8.49412e-13	8.25497e-12	18.7636
ENSG00000255191	RP11-626H12.1	NA	NA	ENSG00000255191_RP11-626H12.1	3.76115	-3.04506	9.53652	8.56821e-13	8.31299e-12	18.7657
ENSG00000168350	DEGS2	123099	Q6QHC5	ENSG00000168350_DEGS2	-3.61524	-1.10256	-9.53184	8.70531e-13	8.43656e-12	18.9372
ENSG00000036672	USP2	9099	O75604	ENSG00000036672_USP2	-1.39241	1.88761	-9.52349	8.95594e-13	8.66007e-12	18.8062
ENSG00000227066	RP3-340N1.2	NA	NA	ENSG00000227066_RP3-340N1.2	-3.2929	-2.72401	-9.52353	8.95452e-13	8.66007e-12	18.7777
ENSG00000172243	CLEC7A	64581	Q9BXN2	ENSG00000172243_CLEC7A	-4.21443	0.737974	-9.51788	9.12829e-13	8.82181e-12	18.9142
ENSG00000168004	HRASLS5	117245	H0YGT7	ENSG00000168004_HRASLS5	-3.02077	-3.42077	-9.5111	9.34091e-13	9.01723e-12	18.6698
ENSG00000140557	ST8SIA2	8128	Q92186	ENSG00000140557_ST8SIA2	5.26205	-0.0831194	9.50891	9.41075e-13	9.07959e-12	18.8552
ENSG00000165125	TRPV6	55503	Q9H1D0	ENSG00000165125_TRPV6	-5.09211	0.136043	-9.5042	9.56264e-13	9.19542e-12	18.8515
ENSG00000156127	BATF	10538	Q16520	ENSG00000156127_BATF	-3.91301	-2.90595	-9.50303	9.60068e-13	9.22688e-12	18.6623
ENSG00000099812	MISP	126353	Q8IVT2	ENSG00000099812_MISP	-1.87573	5.31401	-9.49922	9.7259e-13	9.34204e-12	18.2605
ENSG00000206075	SERPINB5	5268	P36952	ENSG00000206075_SERPINB5	1.04225	10.0712	9.48601	1.01728e-12	9.7605e-12	17.9553
ENSG00000255364	RP11-94A24.1	NA	NA	ENSG00000255364_RP11-94A24.1	3.07814	-2.78878	9.48215	1.03073e-12	9.85682e-12	18.6538
ENSG00000196159	FAT4	79633	Q6V0I7	ENSG00000196159_FAT4	2.49788	0.858807	9.48277	1.02855e-12	9.85682e-12	18.7869
ENSG00000106003	LFNG	3955	Q8NES3	ENSG00000106003_LFNG	1.65237	4.69271	9.48246	1.02966e-12	9.85682e-12	18.2834
ENSG00000147676	MAL2	114569	A0A087WZL1	ENSG00000147676_MAL2	-1.49168	7.79122	-9.48246	1.02963e-12	9.85682e-12	17.9668
ENSG00000052344	PRSS8	5652	Q16651	ENSG00000052344_PRSS8	-1.40329	6.2545	-9.48131	1.03369e-12	9.87964e-12	18.0582
ENSG00000081803	CADPS2	93664	H0Y8B5	ENSG00000081803_CADPS2	-1.39135	3.76131	-9.47144	1.069e-12	1.02058e-11	18.393
ENSG00000257127	CLLU1	574028	NA	ENSG00000257127_CLLU1	-2.62247	-4.01348	-9.46634	1.0877e-12	1.03729e-11	18.4675
ENSG00000111863	ADTRP	84830	H0Y9P4	ENSG00000111863_ADTRP	2.16752	3.62761	9.46455	1.09437e-12	1.04251e-11	18.3681
ENSG00000166002	SMCO4	56935	Q9NRQ5	ENSG00000166002_SMCO4	-1.32904	2.16428	-9.46053	1.10943e-12	1.0557e-11	18.5961
ENSG00000253161	LINC01605	NA	NA	ENSG00000253161_LINC01605	3.52922	-1.65955	9.45944	1.11356e-12	1.05904e-11	18.6824
ENSG00000183780	SLC35F3	148641	Q8IY50	ENSG00000183780_SLC35F3	1.66899	4.56464	9.45561	1.12817e-12	1.07118e-11	18.1763
ENSG00000173227	SYT12	91683	Q8IV01	ENSG00000173227_SYT12	-2.10932	6.20713	-9.45219	1.1414e-12	1.08314e-11	17.9686
ENSG00000140835	CHST4	10164	Q8NCG5	ENSG00000140835_CHST4	-1.89398	0.583815	-9.45145	1.14427e-12	1.08528e-11	18.6846
ENSG00000267530	AC006273.5	NA	NA	ENSG00000267530_AC006273.5	-2.48679	-2.0089	-9.44755	1.15956e-12	1.09917e-11	18.5816
ENSG00000205426	KRT81	3887	Q14533	ENSG00000205426_KRT81	-2.90457	8.35834	-9.44365	1.17508e-12	1.11266e-11	17.848
ENSG00000186493	C5orf38	153571	Q86SI9	ENSG00000186493_C5orf38	-1.80893	3.82723	-9.44296	1.17786e-12	1.11468e-11	18.2797
ENSG00000166173	LARP6	55323	Q9BRS8	ENSG00000166173_LARP6	1.08905	4.37168	9.44158	1.18339e-12	1.1187e-11	18.2156
ENSG00000196668	LINC00173	100287569	NA	ENSG00000196668_LINC00173	3.12835	-0.72841	9.43124	1.22584e-12	1.1582e-11	18.6192
ENSG00000259370	RP11-1069G10.1	105370854	NA	ENSG00000259370_RP11-1069G10.1	-3.42218	-1.90322	-9.42861	1.23685e-12	1.16797e-11	18.5358
ENSG00000170271	FAXDC2	10826	Q96IV6	ENSG00000170271_FAXDC2	-2.26728	1.22978	-9.4278	1.2403e-12	1.17058e-11	18.5902
ENSG00000183317	EPHA10	284656	H0YER4	ENSG00000183317_EPHA10	-3.38049	-3.27298	-9.42612	1.2474e-12	1.17664e-11	18.3972
ENSG00000197415	VEPH1	79674	Q14D04	ENSG00000197415_VEPH1	-1.93584	0.14979	-9.42194	1.26532e-12	1.19161e-11	18.5918
ENSG00000070540	WIPI1	55062	K7EKN0	ENSG00000070540_WIPI1	-1.08363	4.97948	-9.42	1.27372e-12	1.19821e-11	18.0246
ENSG00000214193	SH3D21	79729	B5MDU9	ENSG00000214193_SH3D21	-1.26698	5.21421	-9.41933	1.27661e-12	1.20027e-11	17.9259
ENSG00000162836	ACP6	51205	V9GZ71	ENSG00000162836_ACP6	-1.14691	4.71202	-9.41793	1.28272e-12	1.20537e-11	18.0479
ENSG00000127507	ADGRE2	30817	Q9UHX3	ENSG00000127507_ADGRE2	-1.81898	5.34241	-9.41447	1.29794e-12	1.21901e-11	17.9551
ENSG00000250891	CTD-2281M20.1	NA	NA	ENSG00000250891_CTD-2281M20.1	-2.58293	-4.12858	-9.41204	1.30876e-12	1.2285e-11	18.2947
ENSG00000147883	CDKN2B	1030	P42772	ENSG00000147883_CDKN2B	-1.82011	5.74804	-9.4059	1.33644e-12	1.25245e-11	17.8961
ENSG00000171889	MIR31HG	NA	NA	ENSG00000171889_MIR31HG	1.50803	2.9232	9.4022	1.35342e-12	1.26768e-11	18.2841
ENSG00000144481	TRPM8	79054	Q7Z2W7	ENSG00000144481_TRPM8	-3.83258	-2.05606	-9.39831	1.37148e-12	1.2839e-11	18.4062
ENSG00000070808	CAMK2A	815	Q9UQM7	ENSG00000070808_CAMK2A	4.03854	-0.842606	9.39331	1.39506e-12	1.30456e-11	18.4675
ENSG00000137880	GCHFR	2644	P30047	ENSG00000137880_GCHFR	-1.95687	1.24562	-9.38641	1.4283e-12	1.33493e-11	18.4294
ENSG00000111728	ST8SIA1	6489	NA	ENSG00000111728_ST8SIA1	-4.90998	-0.832747	-9.38604	1.43011e-12	1.3359e-11	18.4277
ENSG00000143786	CNIH3	149111	NA	ENSG00000143786_CNIH3	2.28499	0.789485	9.38445	1.43793e-12	1.34248e-11	18.4577
ENSG00000267279	RP11-879F14.2	NA	NA	ENSG00000267279_RP11-879F14.2	1.8325	0.957877	9.38195	1.45021e-12	1.35322e-11	18.4156
ENSG00000189221	MAOA	4128	P21397	ENSG00000189221_MAOA	1.99774	5.01651	9.37243	1.49811e-12	1.39566e-11	17.8074
ENSG00000204396	VWA7	80737	Q9Y334	ENSG00000204396_VWA7	-1.6033	0.866253	-9.36369	1.5435e-12	1.4364e-11	18.3739
ENSG00000151136	BTBD11	121551	A6QL63	ENSG00000151136_BTBD11	1.07532	5.22342	9.36208	1.55202e-12	1.44355e-11	17.7303
ENSG00000154240	CEP112	201134	Q8N8E3	ENSG00000154240_CEP112	1.32688	2.36196	9.36179	1.55356e-12	1.44421e-11	18.2251
ENSG00000178573	MAF	4094	H3BP11	ENSG00000178573_MAF	2.52507	3.4264	9.3569	1.57971e-12	1.46773e-11	18.1391
ENSG00000182585	EPGN	255324	Q6UW88	ENSG00000182585_EPGN	1.51503	5.99135	9.34933	1.62113e-12	1.50299e-11	17.6037
ENSG00000251537	RP11-385D13.1	NA	H0Y626	ENSG00000251537_RP11-385D13.1	-2.87573	-2.67886	-9.348	1.62849e-12	1.50901e-11	18.2295
ENSG00000055732	MCOLN3	55283	Q8TDD5	ENSG00000055732_MCOLN3	2.11002	2.72555	9.34544	1.64279e-12	1.51982e-11	18.0915
ENSG00000253313	C1orf210	149466	Q8IVY1	ENSG00000253313_C1orf210	-1.25971	3.09916	-9.34057	1.67041e-12	1.54208e-11	18.0531
ENSG00000198865	CCDC152	100129792	Q4G0S7	ENSG00000198865_CCDC152	3.77901	-1.38349	9.33436	1.70619e-12	1.57344e-11	18.2637
[truncated: 1,896 more rows]
