# Supplementary material for: Luminal epithelial cells integrate variable responses to aging into stereotypical changes that underlie breast cancer susceptibility
Source: eLife. 2024 Nov 15;13:e95720. doi: 10.7554/eLife.95720 (PMC11723586; doi:10.7554/eLife.95720)
Supplement: Figure 2—source data 1. — (A–B) Ligand-receptor pairs (A) with lineage-specific DE in younger women; and (B) that lost lineage-specific DE in older women. [file elife-95720-fig2-data1.xlsx]

## Sheet: A LRP DE MEP vs LEP in Young
LigandReceptorPair	Ligand	Receptor	Ligand.EnsemblID	Receptor.EnsemblID	Ligand.CellType.AgeGroup	Receptor.CellType.AgeGroup	CellType.Interaction	Ligand.CellType.Gene	Receptor.CellType.Gene
ADCYAP1-VIPR1	ADCYAP1	VIPR1	ENSG00000141433	ENSG00000114812	LEP Young	LEP Young	LEP-LEP	LEP-L-ADCYAP1	LEP-R-VIPR1
ALOX5AP-ALOX5	ALOX5AP	ALOX5	ENSG00000132965	ENSG00000012779	LEP Young	LEP Young	LEP-LEP	LEP-L-ALOX5AP	LEP-R-ALOX5
BTC-ERBB2	BTC	ERBB2	ENSG00000174808	ENSG00000141736	LEP Young	LEP Young	LEP-LEP	LEP-L-BTC	LEP-R-ERBB2
BTC-ERBB3	BTC	ERBB3	ENSG00000174808	ENSG00000065361	LEP Young	LEP Young	LEP-LEP	LEP-L-BTC	LEP-R-ERBB3
C3-C5AR2	C3	C5AR2	ENSG00000125730	ENSG00000134830	LEP Young	LEP Young	LEP-LEP	LEP-L-C3	LEP-R-C5AR2
C3-ITGB2	C3	ITGB2	ENSG00000125730	ENSG00000160255	LEP Young	LEP Young	LEP-LEP	LEP-L-C3	LEP-R-ITGB2
CD34-SELL	CD34	SELL	ENSG00000174059	ENSG00000188404	LEP Young	LEP Young	LEP-LEP	LEP-L-CD34	LEP-R-SELL
CGN-OCLN	CGN	OCLN	ENSG00000143375	ENSG00000197822	LEP Young	LEP Young	LEP-LEP	LEP-L-CGN	LEP-R-OCLN
CTGF-ITGB2	CTGF	ITGB2	ENSG00000118523	ENSG00000160255	LEP Young	LEP Young	LEP-LEP	LEP-L-CTGF	LEP-R-ITGB2
EGF-ERBB2	EGF	ERBB2	ENSG00000138798	ENSG00000141736	LEP Young	LEP Young	LEP-LEP	LEP-L-EGF	LEP-R-ERBB2
EGF-ERBB3	EGF	ERBB3	ENSG00000138798	ENSG00000065361	LEP Young	LEP Young	LEP-LEP	LEP-L-EGF	LEP-R-ERBB3
ENC1-ACKR2	ENC1	ACKR2	ENSG00000151882	ENSG00000144648	LEP Young	LEP Young	LEP-LEP	LEP-L-ENC1	LEP-R-ACKR2
ENC1-CCR3	ENC1	CCR3	ENSG00000151882	ENSG00000183625	LEP Young	LEP Young	LEP-LEP	LEP-L-ENC1	LEP-R-CCR3
F3-TFR2	F3	TFR2	ENSG00000091513	ENSG00000106327	LEP Young	LEP Young	LEP-LEP	LEP-L-F3	LEP-R-TFR2
HLA-A-ERBB2	HLA-A	ERBB2	ENSG00000206503	ENSG00000141736	LEP Young	LEP Young	LEP-LEP	LEP-L-HLA-A	LEP-R-ERBB2
HLA-G-CD4	HLA-G	CD4	ENSG00000204632	ENSG00000010610	LEP Young	LEP Young	LEP-LEP	LEP-L-HLA-G	LEP-R-CD4
IL15-IL2RG	IL15	IL2RG	ENSG00000164136	ENSG00000147168	LEP Young	LEP Young	LEP-LEP	LEP-L-IL15	LEP-R-IL2RG
INHBB-ACVR1C	INHBB	ACVR1C	ENSG00000163083	ENSG00000123612	LEP Young	LEP Young	LEP-LEP	LEP-L-INHBB	LEP-R-ACVR1C
LIPC-LPAR2	LIPC	LPAR2	ENSG00000163898	ENSG00000064547	LEP Young	LEP Young	LEP-LEP	LEP-L-LIPC	LEP-R-LPAR2
LYPD3-AGR2	LYPD3	AGR2	ENSG00000124466	ENSG00000106541	LEP Young	LEP Young	LEP-LEP	LEP-L-LYPD3	LEP-R-AGR2
MIA-DCHS1	MIA	DCHS1	ENSG00000261857	ENSG00000071991	LEP Young	LEP Young	LEP-LEP	LEP-L-MIA	LEP-R-DCHS1
MLF2-UNC5A	MLF2	UNC5A	ENSG00000074527	ENSG00000113763	LEP Young	LEP Young	LEP-LEP	LEP-L-MLF2	LEP-R-UNC5A
MMP9-ITGB2	MMP9	ITGB2	ENSG00000100985	ENSG00000160255	LEP Young	LEP Young	LEP-LEP	LEP-L-MMP9	LEP-R-ITGB2
NRG4-ERBB2	NRG4	ERBB2	ENSG00000169752	ENSG00000141736	LEP Young	LEP Young	LEP-LEP	LEP-L-NRG4	LEP-R-ERBB2
NTN1-UNC5A	NTN1	UNC5A	ENSG00000065320	ENSG00000113763	LEP Young	LEP Young	LEP-LEP	LEP-L-NTN1	LEP-R-UNC5A
PIP-CD4	PIP	CD4	ENSG00000159763	ENSG00000010610	LEP Young	LEP Young	LEP-LEP	LEP-L-PIP	LEP-R-CD4
PODXL-SELL	PODXL	SELL	ENSG00000128567	ENSG00000188404	LEP Young	LEP Young	LEP-LEP	LEP-L-PODXL	LEP-R-SELL
PODXL2-SELL	PODXL2	SELL	ENSG00000114631	ENSG00000188404	LEP Young	LEP Young	LEP-LEP	LEP-L-PODXL2	LEP-R-SELL
POLR2D-STRA6	POLR2D	STRA6	ENSG00000138207	ENSG00000137868	LEP Young	LEP Young	LEP-LEP	LEP-L-POLR2D	LEP-R-STRA6
SEMA4G-PLXNB2	SEMA4G	PLXNB2	ENSG00000095539	ENSG00000196576	LEP Young	LEP Young	LEP-LEP	LEP-L-SEMA4G	LEP-R-PLXNB2
SLPI-CD4	SLPI	CD4	ENSG00000124107	ENSG00000010610	LEP Young	LEP Young	LEP-LEP	LEP-L-SLPI	LEP-R-CD4
TNFSF10-BTF3P11	TNFSF10	BTF3P11	ENSG00000121858	ENSG00000164761	LEP Young	LEP Young	LEP-LEP	LEP-L-TNFSF10	LEP-R-BTF3P11
TNFSF10-TNFRSF10C	TNFSF10	TNFRSF10C	ENSG00000121858	ENSG00000173535	LEP Young	LEP Young	LEP-LEP	LEP-L-TNFSF10	LEP-R-TNFRSF10C
TNFSF11-BTF3P11	TNFSF11	BTF3P11	ENSG00000120659	ENSG00000164761	LEP Young	LEP Young	LEP-LEP	LEP-L-TNFSF11	LEP-R-BTF3P11
TNFSF11-TNFRSF11A	TNFSF11	TNFRSF11A	ENSG00000120659	ENSG00000141655	LEP Young	LEP Young	LEP-LEP	LEP-L-TNFSF11	LEP-R-TNFRSF11A
TNFSF13-BTF3P11	TNFSF13	BTF3P11	ENSG00000161955	ENSG00000164761	LEP Young	LEP Young	LEP-LEP	LEP-L-TNFSF13	LEP-R-BTF3P11
TNFSF13-TNFRSF14	TNFSF13	TNFRSF14	ENSG00000161955	ENSG00000157873	LEP Young	LEP Young	LEP-LEP	LEP-L-TNFSF13	LEP-R-TNFRSF14
TNFSF14-TNFRSF14	TNFSF14	TNFRSF14	ENSG00000125735	ENSG00000157873	LEP Young	LEP Young	LEP-LEP	LEP-L-TNFSF14	LEP-R-TNFRSF14
ZG16B-TLR5	ZG16B	TLR5	ENSG00000162078	ENSG00000187554	LEP Young	LEP Young	LEP-LEP	LEP-L-ZG16B	LEP-R-TLR5
ZG16B-TLR6	ZG16B	TLR6	ENSG00000162078	ENSG00000174130	LEP Young	LEP Young	LEP-LEP	LEP-L-ZG16B	LEP-R-TLR6
ACE-BDKRB1	ACE	BDKRB1	ENSG00000159640	ENSG00000168398	LEP Young	MEP Young	LEP-MEP	LEP-L-ACE	MEP-R-BDKRB1
ADM2-CALCRL	ADM2	CALCRL	ENSG00000128165	ENSG00000064989	LEP Young	MEP Young	LEP-MEP	LEP-L-ADM2	MEP-R-CALCRL
ADM2-RAMP1	ADM2	RAMP1	ENSG00000128165	ENSG00000132329	LEP Young	MEP Young	LEP-MEP	LEP-L-ADM2	MEP-R-RAMP1
ANXA1-EGFR	ANXA1	EGFR	ENSG00000135046	ENSG00000146648	LEP Young	MEP Young	LEP-MEP	LEP-L-ANXA1	MEP-R-EGFR
B2M-KLRC1	B2M	KLRC1	ENSG00000166710	ENSG00000134545	LEP Young	MEP Young	LEP-MEP	LEP-L-B2M	MEP-R-KLRC1
BTC-EGFR	BTC	EGFR	ENSG00000174808	ENSG00000146648	LEP Young	MEP Young	LEP-MEP	LEP-L-BTC	MEP-R-EGFR
CGN-TGFBR1	CGN	TGFBR1	ENSG00000143375	ENSG00000106799	LEP Young	MEP Young	LEP-MEP	LEP-L-CGN	MEP-R-TGFBR1
CHAD-ITGA2	CHAD	ITGA2	ENSG00000136457	ENSG00000164171	LEP Young	MEP Young	LEP-MEP	LEP-L-CHAD	MEP-R-ITGA2
COL6A1-ITGA1	COL6A1	ITGA1	ENSG00000142156	ENSG00000213949	LEP Young	MEP Young	LEP-MEP	LEP-L-COL6A1	MEP-R-ITGA1
COL6A1-ITGA2	COL6A1	ITGA2	ENSG00000142156	ENSG00000164171	LEP Young	MEP Young	LEP-MEP	LEP-L-COL6A1	MEP-R-ITGA2
COL6A1-ITGA6	COL6A1	ITGA6	ENSG00000142156	ENSG00000091409	LEP Young	MEP Young	LEP-MEP	LEP-L-COL6A1	MEP-R-ITGA6
COL6A2-ITGA1	COL6A2	ITGA1	ENSG00000142173	ENSG00000213949	LEP Young	MEP Young	LEP-MEP	LEP-L-COL6A2	MEP-R-ITGA1
COL6A2-ITGA2	COL6A2	ITGA2	ENSG00000142173	ENSG00000164171	LEP Young	MEP Young	LEP-MEP	LEP-L-COL6A2	MEP-R-ITGA2
CXCL5-CXCR1	CXCL5	CXCR1	ENSG00000163735	ENSG00000163464	LEP Young	MEP Young	LEP-MEP	LEP-L-CXCL5	MEP-R-CXCR1
CXCL6-CXCR1	CXCL6	CXCR1	ENSG00000124875	ENSG00000163464	LEP Young	MEP Young	LEP-MEP	LEP-L-CXCL6	MEP-R-CXCR1
EDN1-EDNRA	EDN1	EDNRA	ENSG00000078401	ENSG00000151617	LEP Young	MEP Young	LEP-MEP	LEP-L-EDN1	MEP-R-EDNRA
EDN2-EDNRA	EDN2	EDNRA	ENSG00000127129	ENSG00000151617	LEP Young	MEP Young	LEP-MEP	LEP-L-EDN2	MEP-R-EDNRA
EFNA1-EPHA3	EFNA1	EPHA3	ENSG00000169242	ENSG00000044524	LEP Young	MEP Young	LEP-MEP	LEP-L-EFNA1	MEP-R-EPHA3
EFNA3-EPHA3	EFNA3	EPHA3	ENSG00000143590	ENSG00000044524	LEP Young	MEP Young	LEP-MEP	LEP-L-EFNA3	MEP-R-EPHA3
EFNA4-EPHA3	EFNA4	EPHA3	ENSG00000243364	ENSG00000044524	LEP Young	MEP Young	LEP-MEP	LEP-L-EFNA4	MEP-R-EPHA3
EFNA5-EPHA3	EFNA5	EPHA3	ENSG00000184349	ENSG00000044524	LEP Young	MEP Young	LEP-MEP	LEP-L-EFNA5	MEP-R-EPHA3
EGF-EGFR	EGF	EGFR	ENSG00000138798	ENSG00000146648	LEP Young	MEP Young	LEP-MEP	LEP-L-EGF	MEP-R-EGFR
FGF13-EGFR	FGF13	EGFR	ENSG00000129682	ENSG00000146648	LEP Young	MEP Young	LEP-MEP	LEP-L-FGF13	MEP-R-EGFR
FGF13-FGFR2	FGF13	FGFR2	ENSG00000129682	ENSG00000066468	LEP Young	MEP Young	LEP-MEP	LEP-L-FGF13	MEP-R-FGFR2
FGF13-FGFR3	FGF13	FGFR3	ENSG00000129682	ENSG00000068078	LEP Young	MEP Young	LEP-MEP	LEP-L-FGF13	MEP-R-FGFR3
FGF13-SCN8A	FGF13	SCN8A	ENSG00000129682	ENSG00000196876	LEP Young	MEP Young	LEP-MEP	LEP-L-FGF13	MEP-R-SCN8A
FGF17-FGFR2	FGF17	FGFR2	ENSG00000158815	ENSG00000066468	LEP Young	MEP Young	LEP-MEP	LEP-L-FGF17	MEP-R-FGFR2
FGF17-FGFR3	FGF17	FGFR3	ENSG00000158815	ENSG00000068078	LEP Young	MEP Young	LEP-MEP	LEP-L-FGF17	MEP-R-FGFR3
GDF5-ROR2	GDF5	ROR2	ENSG00000125965	ENSG00000169071	LEP Young	MEP Young	LEP-MEP	LEP-L-GDF5	MEP-R-ROR2
HLA-C-NOTCH4	HLA-C	NOTCH4	ENSG00000204525	ENSG00000204301	LEP Young	MEP Young	LEP-MEP	LEP-L-HLA-C	MEP-R-NOTCH4
HLA-G-KLRC1	HLA-G	KLRC1	ENSG00000204632	ENSG00000134545	LEP Young	MEP Young	LEP-MEP	LEP-L-HLA-G	MEP-R-KLRC1
IL18-IL18R1	IL18	IL18R1	ENSG00000150782	ENSG00000115604	LEP Young	MEP Young	LEP-MEP	LEP-L-IL18	MEP-R-IL18R1
LCP1-CD44	LCP1	CD44	ENSG00000175445	ENSG00000026508	LEP Young	MEP Young	LEP-MEP	LEP-L-LCP1	MEP-R-CD44
LIPC-LPAR1	LIPC	LPAR1	ENSG00000163898	ENSG00000198121	LEP Young	MEP Young	LEP-MEP	LEP-L-LIPC	MEP-R-LPAR1
MMP7-CD44	MMP7	CD44	ENSG00000137673	ENSG00000026508	LEP Young	MEP Young	LEP-MEP	LEP-L-MMP7	MEP-R-CD44
MMP9-CD44	MMP9	CD44	ENSG00000100985	ENSG00000026508	LEP Young	MEP Young	LEP-MEP	LEP-L-MMP9	MEP-R-CD44
NCAM1-CACNA1C	NCAM1	CACNA1C	ENSG00000149294	ENSG00000151067	LEP Young	MEP Young	LEP-MEP	LEP-L-NCAM1	MEP-R-CACNA1C
NCAM1-FGFR2	NCAM1	FGFR2	ENSG00000149294	ENSG00000066468	LEP Young	MEP Young	LEP-MEP	LEP-L-NCAM1	MEP-R-FGFR2
NRG4-EGFR	NRG4	EGFR	ENSG00000169752	ENSG00000146648	LEP Young	MEP Young	LEP-MEP	LEP-L-NRG4	MEP-R-EGFR
NRTN-RET	NRTN	RET	ENSG00000171119	ENSG00000165731	LEP Young	MEP Young	LEP-MEP	LEP-L-NRTN	MEP-R-RET
NTN1-NEO1	NTN1	NEO1	ENSG00000065320	ENSG00000067141	LEP Young	MEP Young	LEP-MEP	LEP-L-NTN1	MEP-R-NEO1
NTN1-UNC5D	NTN1	UNC5D	ENSG00000065320	ENSG00000156687	LEP Young	MEP Young	LEP-MEP	LEP-L-NTN1	MEP-R-UNC5D
PPBP-CXCR1	PPBP	CXCR1	ENSG00000163736	ENSG00000163464	LEP Young	MEP Young	LEP-MEP	LEP-L-PPBP	MEP-R-CXCR1
RGMA-NEO1	RGMA	NEO1	ENSG00000182175	ENSG00000067141	LEP Young	MEP Young	LEP-MEP	LEP-L-RGMA	MEP-R-NEO1
SEMA3B-NELL1	SEMA3B	NELL1	ENSG00000012171	ENSG00000099250	LEP Young	MEP Young	LEP-MEP	LEP-L-SEMA3B	MEP-R-NELL1
SEMA3B-NELL2	SEMA3B	NELL2	ENSG00000012171	ENSG00000118257	LEP Young	MEP Young	LEP-MEP	LEP-L-SEMA3B	MEP-R-NELL2
SEMA3E-NELL1	SEMA3E	NELL1	ENSG00000170381	ENSG00000099250	LEP Young	MEP Young	LEP-MEP	LEP-L-SEMA3E	MEP-R-NELL1
SPINK1-EGFR	SPINK1	EGFR	ENSG00000164266	ENSG00000146648	LEP Young	MEP Young	LEP-MEP	LEP-L-SPINK1	MEP-R-EGFR
TGFB2-TGFBR1	TGFB2	TGFBR1	ENSG00000092969	ENSG00000106799	LEP Young	MEP Young	LEP-MEP	LEP-L-TGFB2	MEP-R-TGFBR1
TNFSF13-FAS	TNFSF13	FAS	ENSG00000161955	ENSG00000026103	LEP Young	MEP Young	LEP-MEP	LEP-L-TNFSF13	MEP-R-FAS
TNFSF13-SDC2	TNFSF13	SDC2	ENSG00000161955	ENSG00000169439	LEP Young	MEP Young	LEP-MEP	LEP-L-TNFSF13	MEP-R-SDC2
AHSG-INSR	AHSG	INSR	ENSG00000145192	ENSG00000171105	MEP Young	LEP Young	MEP-LEP	MEP-L-AHSG	LEP-R-INSR
ARTN-GFRA3	ARTN	GFRA3	ENSG00000117407	ENSG00000146013	MEP Young	LEP Young	MEP-LEP	MEP-L-ARTN	LEP-R-GFRA3
BDNF-SORT1	BDNF	SORT1	ENSG00000176697	ENSG00000134243	MEP Young	LEP Young	MEP-LEP	MEP-L-BDNF	LEP-R-SORT1
C5-C5AR2	C5	C5AR2	ENSG00000106804	ENSG00000134830	MEP Young	LEP Young	MEP-LEP	MEP-L-C5	LEP-R-C5AR2
CFH-SELL	CFH	SELL	ENSG00000000971	ENSG00000188404	MEP Young	LEP Young	MEP-LEP	MEP-L-CFH	LEP-R-SELL
CXCL11-CCR3	CXCL11	CCR3	ENSG00000169248	ENSG00000183625	MEP Young	LEP Young	MEP-LEP	MEP-L-CXCL11	LEP-R-CCR3
DLL1-NOTCH3	DLL1	NOTCH3	ENSG00000198719	ENSG00000074181	MEP Young	LEP Young	MEP-LEP	MEP-L-DLL1	LEP-R-NOTCH3
DLL3-NOTCH3	DLL3	NOTCH3	ENSG00000090932	ENSG00000074181	MEP Young	LEP Young	MEP-LEP	MEP-L-DLL3	LEP-R-NOTCH3
EFNB1-EPHB3	EFNB1	EPHB3	ENSG00000090776	ENSG00000182580	MEP Young	LEP Young	MEP-LEP	MEP-L-EFNB1	LEP-R-EPHB3
EFNB1-ERBB2	EFNB1	ERBB2	ENSG00000090776	ENSG00000141736	MEP Young	LEP Young	MEP-LEP	MEP-L-EFNB1	LEP-R-ERBB2
EFNB3-EPHB3	EFNB3	EPHB3	ENSG00000108947	ENSG00000182580	MEP Young	LEP Young	MEP-LEP	MEP-L-EFNB3	LEP-R-EPHB3
EFNB3-RHBDL2	EFNB3	RHBDL2	ENSG00000108947	ENSG00000158315	MEP Young	LEP Young	MEP-LEP	MEP-L-EFNB3	LEP-R-RHBDL2
FGF19-KLB	FGF19	KLB	ENSG00000162344	ENSG00000134962	MEP Young	LEP Young	MEP-LEP	MEP-L-FGF19	LEP-R-KLB
FN1-BTF3P11	FN1	BTF3P11	ENSG00000115414	ENSG00000164761	MEP Young	LEP Young	MEP-LEP	MEP-L-FN1	LEP-R-BTF3P11
FN1-IL17RC	FN1	IL17RC	ENSG00000115414	ENSG00000163702	MEP Young	LEP Young	MEP-LEP	MEP-L-FN1	LEP-R-IL17RC
FN1-ITGB7	FN1	ITGB7	ENSG00000115414	ENSG00000139626	MEP Young	LEP Young	MEP-LEP	MEP-L-FN1	LEP-R-ITGB7
HBEGF-ERBB2	HBEGF	ERBB2	ENSG00000113070	ENSG00000141736	MEP Young	LEP Young	MEP-LEP	MEP-L-HBEGF	LEP-R-ERBB2
HBEGF-PRLR	HBEGF	PRLR	ENSG00000113070	ENSG00000113494	MEP Young	LEP Young	MEP-LEP	MEP-L-HBEGF	LEP-R-PRLR
HRAS-INSR	HRAS	INSR	ENSG00000174775	ENSG00000171105	MEP Young	LEP Young	MEP-LEP	MEP-L-HRAS	LEP-R-INSR
ICAM4-ITGB2	ICAM4	ITGB2	ENSG00000105371	ENSG00000160255	MEP Young	LEP Young	MEP-LEP	MEP-L-ICAM4	LEP-R-ITGB2
ICAM5-ITGB2	ICAM5	ITGB2	ENSG00000105376	ENSG00000160255	MEP Young	LEP Young	MEP-LEP	MEP-L-ICAM5	LEP-R-ITGB2
IL16-CD4	IL16	CD4	ENSG00000172349	ENSG00000010610	MEP Young	LEP Young	MEP-LEP	MEP-L-IL16	LEP-R-CD4
IL16-KCNJ4	IL16	KCNJ4	ENSG00000172349	ENSG00000168135	MEP Young	LEP Young	MEP-LEP	MEP-L-IL16	LEP-R-KCNJ4
JAG2-NOTCH3	JAG2	NOTCH3	ENSG00000184916	ENSG00000074181	MEP Young	LEP Young	MEP-LEP	MEP-L-JAG2	LEP-R-NOTCH3
KITLG-KIT	KITLG	KIT	ENSG00000049130	ENSG00000157404	MEP Young	LEP Young	MEP-LEP	MEP-L-KITLG	LEP-R-KIT
NRG1-ERBB2	NRG1	ERBB2	ENSG00000157168	ENSG00000141736	MEP Young	LEP Young	MEP-LEP	MEP-L-NRG1	LEP-R-ERBB2
NRG1-ERBB3	NRG1	ERBB3	ENSG00000157168	ENSG00000065361	MEP Young	LEP Young	MEP-LEP	MEP-L-NRG1	LEP-R-ERBB3
NRG2-ERBB2	NRG2	ERBB2	ENSG00000158458	ENSG00000141736	MEP Young	LEP Young	MEP-LEP	MEP-L-NRG2	LEP-R-ERBB2
NRG2-ERBB3	NRG2	ERBB3	ENSG00000158458	ENSG00000065361	MEP Young	LEP Young	MEP-LEP	MEP-L-NRG2	LEP-R-ERBB3
NTNG1-LRRC4C	NTNG1	LRRC4C	ENSG00000162631	ENSG00000148948	MEP Young	LEP Young	MEP-LEP	MEP-L-NTNG1	LEP-R-LRRC4C
PLAT-ITGB2	PLAT	ITGB2	ENSG00000104368	ENSG00000160255	MEP Young	LEP Young	MEP-LEP	MEP-L-PLAT	LEP-R-ITGB2
PLAU-ITGB2	PLAU	ITGB2	ENSG00000122861	ENSG00000160255	MEP Young	LEP Young	MEP-LEP	MEP-L-PLAU	LEP-R-ITGB2
PTGS2-ALOX5	PTGS2	ALOX5	ENSG00000073756	ENSG00000012779	MEP Young	LEP Young	MEP-LEP	MEP-L-PTGS2	LEP-R-ALOX5
PTN-PLXNB2	PTN	PLXNB2	ENSG00000105894	ENSG00000196576	MEP Young	LEP Young	MEP-LEP	MEP-L-PTN	LEP-R-PLXNB2
PTN-PTPRB	PTN	PTPRB	ENSG00000105894	ENSG00000127329	MEP Young	LEP Young	MEP-LEP	MEP-L-PTN	LEP-R-PTPRB
SEMA3F-PLXNA3	SEMA3F	PLXNA3	ENSG00000001617	ENSG00000130827	MEP Young	LEP Young	MEP-LEP	MEP-L-SEMA3F	LEP-R-PLXNA3
SEMA5A-PLXNB3	SEMA5A	PLXNB3	ENSG00000112902	ENSG00000198753	MEP Young	LEP Young	MEP-LEP	MEP-L-SEMA5A	LEP-R-PLXNB3
SLIT1-ROBO2	SLIT1	ROBO2	ENSG00000184347	ENSG00000185008	MEP Young	LEP Young	MEP-LEP	MEP-L-SLIT1	LEP-R-ROBO2
THBS2-NOTCH3	THBS2	NOTCH3	ENSG00000186340	ENSG00000074181	MEP Young	LEP Young	MEP-LEP	MEP-L-THBS2	LEP-R-NOTCH3
TNFSF18-TNFRSF18	TNFSF18	TNFRSF18	ENSG00000120337	ENSG00000186891	MEP Young	LEP Young	MEP-LEP	MEP-L-TNFSF18	LEP-R-TNFRSF18
UTS2-CRHR1	UTS2	CRHR1	ENSG00000145040	ENSG00000120088	MEP Young	LEP Young	MEP-LEP	MEP-L-UTS2	LEP-R-CRHR1
ARTN-RET	ARTN	RET	ENSG00000117407	ENSG00000165731	MEP Young	MEP Young	MEP-MEP	MEP-L-ARTN	MEP-R-RET
BDNF-NGFR	BDNF	NGFR	ENSG00000176697	ENSG00000064300	MEP Young	MEP Young	MEP-MEP	MEP-L-BDNF	MEP-R-NGFR
COL11A1-ITGA2	COL11A1	ITGA2	ENSG00000060718	ENSG00000164171	MEP Young	MEP Young	MEP-MEP	MEP-L-COL11A1	MEP-R-ITGA2
COL1A2-CD44	COL1A2	CD44	ENSG00000164692	ENSG00000026508	MEP Young	MEP Young	MEP-MEP	MEP-L-COL1A2	MEP-R-CD44
COL1A2-ITGA1	COL1A2	ITGA1	ENSG00000164692	ENSG00000213949	MEP Young	MEP Young	MEP-MEP	MEP-L-COL1A2	MEP-R-ITGA1
COL1A2-ITGA2	COL1A2	ITGA2	ENSG00000164692	ENSG00000164171	MEP Young	MEP Young	MEP-MEP	MEP-L-COL1A2	MEP-R-ITGA2
COL4A1-ITGA1	COL4A1	ITGA1	ENSG00000187498	ENSG00000213949	MEP Young	MEP Young	MEP-MEP	MEP-L-COL4A1	MEP-R-ITGA1
COL4A1-ITGA2	COL4A1	ITGA2	ENSG00000187498	ENSG00000164171	MEP Young	MEP Young	MEP-MEP	MEP-L-COL4A1	MEP-R-ITGA2
COL4A5-ITGA1	COL4A5	ITGA1	ENSG00000188153	ENSG00000213949	MEP Young	MEP Young	MEP-MEP	MEP-L-COL4A5	MEP-R-ITGA1
COL4A5-ITGA2	COL4A5	ITGA2	ENSG00000188153	ENSG00000164171	MEP Young	MEP Young	MEP-MEP	MEP-L-COL4A5	MEP-R-ITGA2
COL4A6-ITGA1	COL4A6	ITGA1	ENSG00000197565	ENSG00000213949	MEP Young	MEP Young	MEP-MEP	MEP-L-COL4A6	MEP-R-ITGA1
COL4A6-ITGA2	COL4A6	ITGA2	ENSG00000197565	ENSG00000164171	MEP Young	MEP Young	MEP-MEP	MEP-L-COL4A6	MEP-R-ITGA2
COL5A1-ITGA1	COL5A1	ITGA1	ENSG00000130635	ENSG00000213949	MEP Young	MEP Young	MEP-MEP	MEP-L-COL5A1	MEP-R-ITGA1
COL5A1-SDC3	COL5A1	SDC3	ENSG00000130635	ENSG00000162512	MEP Young	MEP Young	MEP-MEP	MEP-L-COL5A1	MEP-R-SDC3
COL5A2-ITGA1	COL5A2	ITGA1	ENSG00000204262	ENSG00000213949	MEP Young	MEP Young	MEP-MEP	MEP-L-COL5A2	MEP-R-ITGA1
COL5A3-SDC3	COL5A3	SDC3	ENSG00000080573	ENSG00000162512	MEP Young	MEP Young	MEP-MEP	MEP-L-COL5A3	MEP-R-SDC3
COL7A1-ITGA2	COL7A1	ITGA2	ENSG00000114270	ENSG00000164171	MEP Young	MEP Young	MEP-MEP	MEP-L-COL7A1	MEP-R-ITGA2
CXCL11-ACKR3	CXCL11	ACKR3	ENSG00000169248	ENSG00000144476	MEP Young	MEP Young	MEP-MEP	MEP-L-CXCL11	MEP-R-ACKR3
DLL1-NOTCH4	DLL1	NOTCH4	ENSG00000198719	ENSG00000204301	MEP Young	MEP Young	MEP-MEP	MEP-L-DLL1	MEP-R-NOTCH4
DLL3-NOTCH4	DLL3	NOTCH4	ENSG00000090932	ENSG00000204301	MEP Young	MEP Young	MEP-MEP	MEP-L-DLL3	MEP-R-NOTCH4
EPGN-EGFR	EPGN	EGFR	ENSG00000182585	ENSG00000146648	MEP Young	MEP Young	MEP-MEP	MEP-L-EPGN	MEP-R-EGFR
FGF1-CD44	FGF1	CD44	ENSG00000113578	ENSG00000026508	MEP Young	MEP Young	MEP-MEP	MEP-L-FGF1	MEP-R-CD44
FGF1-EGFR	FGF1	EGFR	ENSG00000113578	ENSG00000146648	MEP Young	MEP Young	MEP-MEP	MEP-L-FGF1	MEP-R-EGFR
FGF1-FGFR2	FGF1	FGFR2	ENSG00000113578	ENSG00000066468	MEP Young	MEP Young	MEP-MEP	MEP-L-FGF1	MEP-R-FGFR2
FGF1-FGFR3	FGF1	FGFR3	ENSG00000113578	ENSG00000068078	MEP Young	MEP Young	MEP-MEP	MEP-L-FGF1	MEP-R-FGFR3
FGF1-NELL1	FGF1	NELL1	ENSG00000113578	ENSG00000099250	MEP Young	MEP Young	MEP-MEP	MEP-L-FGF1	MEP-R-NELL1
FGF19-FGFR2	FGF19	FGFR2	ENSG00000162344	ENSG00000066468	MEP Young	MEP Young	MEP-MEP	MEP-L-FGF19	MEP-R-FGFR2
FGF19-FGFR3	FGF19	FGFR3	ENSG00000162344	ENSG00000068078	MEP Young	MEP Young	MEP-MEP	MEP-L-FGF19	MEP-R-FGFR3
FGF5-FGFR2	FGF5	FGFR2	ENSG00000138675	ENSG00000066468	MEP Young	MEP Young	MEP-MEP	MEP-L-FGF5	MEP-R-FGFR2
FGF5-FGFR3	FGF5	FGFR3	ENSG00000138675	ENSG00000068078	MEP Young	MEP Young	MEP-MEP	MEP-L-FGF5	MEP-R-FGFR3
FGL1-EGFR	FGL1	EGFR	ENSG00000104760	ENSG00000146648	MEP Young	MEP Young	MEP-MEP	MEP-L-FGL1	MEP-R-EGFR
FN1-CD44	FN1	CD44	ENSG00000115414	ENSG00000026508	MEP Young	MEP Young	MEP-MEP	MEP-L-FN1	MEP-R-CD44
FN1-COL13A1	FN1	COL13A1	ENSG00000115414	ENSG00000197467	MEP Young	MEP Young	MEP-MEP	MEP-L-FN1	MEP-R-COL13A1
FN1-ITGA2	FN1	ITGA2	ENSG00000115414	ENSG00000164171	MEP Young	MEP Young	MEP-MEP	MEP-L-FN1	MEP-R-ITGA2
FN1-ITGA3	FN1	ITGA3	ENSG00000115414	ENSG00000005884	MEP Young	MEP Young	MEP-MEP	MEP-L-FN1	MEP-R-ITGA3
FN1-ITGA6	FN1	ITGA6	ENSG00000115414	ENSG00000091409	MEP Young	MEP Young	MEP-MEP	MEP-L-FN1	MEP-R-ITGA6
FN1-SDC2	FN1	SDC2	ENSG00000115414	ENSG00000169439	MEP Young	MEP Young	MEP-MEP	MEP-L-FN1	MEP-R-SDC2
GDNF-RET	GDNF	RET	ENSG00000168621	ENSG00000165731	MEP Young	MEP Young	MEP-MEP	MEP-L-GDNF	MEP-R-RET
HAS2-CD44	HAS2	CD44	ENSG00000170961	ENSG00000026508	MEP Young	MEP Young	MEP-MEP	MEP-L-HAS2	MEP-R-CD44
HBEGF-CD44	HBEGF	CD44	ENSG00000113070	ENSG00000026508	MEP Young	MEP Young	MEP-MEP	MEP-L-HBEGF	MEP-R-CD44
HBEGF-EGFR	HBEGF	EGFR	ENSG00000113070	ENSG00000146648	MEP Young	MEP Young	MEP-MEP	MEP-L-HBEGF	MEP-R-EGFR
HRAS-SDC2	HRAS	SDC2	ENSG00000174775	ENSG00000169439	MEP Young	MEP Young	MEP-MEP	MEP-L-HRAS	MEP-R-SDC2
IL16-KCNJ15	IL16	KCNJ15	ENSG00000172349	ENSG00000157551	MEP Young	MEP Young	MEP-MEP	MEP-L-IL16	MEP-R-KCNJ15
IL1A-IL1RAP	IL1A	IL1RAP	ENSG00000115008	ENSG00000196083	MEP Young	MEP Young	MEP-MEP	MEP-L-IL1A	MEP-R-IL1RAP
IL1B-ADRB2	IL1B	ADRB2	ENSG00000125538	ENSG00000169252	MEP Young	MEP Young	MEP-MEP	MEP-L-IL1B	MEP-R-ADRB2
IL1B-IL1RAP	IL1B	IL1RAP	ENSG00000125538	ENSG00000196083	MEP Young	MEP Young	MEP-MEP	MEP-L-IL1B	MEP-R-IL1RAP
IL24-IL20RB	IL24	IL20RB	ENSG00000162892	ENSG00000174564	MEP Young	MEP Young	MEP-MEP	MEP-L-IL24	MEP-R-IL20RB
IL24-IL22RA1	IL24	IL22RA1	ENSG00000162892	ENSG00000142677	MEP Young	MEP Young	MEP-MEP	MEP-L-IL24	MEP-R-IL22RA1
JAG2-NOTCH4	JAG2	NOTCH4	ENSG00000184916	ENSG00000204301	MEP Young	MEP Young	MEP-MEP	MEP-L-JAG2	MEP-R-NOTCH4
KITLG-EPOR	KITLG	EPOR	ENSG00000049130	ENSG00000187266	MEP Young	MEP Young	MEP-MEP	MEP-L-KITLG	MEP-R-EPOR
LAMA1-GPC1	LAMA1	GPC1	ENSG00000101680	ENSG00000063660	MEP Young	MEP Young	MEP-MEP	MEP-L-LAMA1	MEP-R-GPC1
LAMA1-ITGA1	LAMA1	ITGA1	ENSG00000101680	ENSG00000213949	MEP Young	MEP Young	MEP-MEP	MEP-L-LAMA1	MEP-R-ITGA1
LAMA1-ITGA2	LAMA1	ITGA2	ENSG00000101680	ENSG00000164171	MEP Young	MEP Young	MEP-MEP	MEP-L-LAMA1	MEP-R-ITGA2
LAMA1-ITGA3	LAMA1	ITGA3	ENSG00000101680	ENSG00000005884	MEP Young	MEP Young	MEP-MEP	MEP-L-LAMA1	MEP-R-ITGA3
LAMA1-ITGA6	LAMA1	ITGA6	ENSG00000101680	ENSG00000091409	MEP Young	MEP Young	MEP-MEP	MEP-L-LAMA1	MEP-R-ITGA6
LAMA1-ITGB4	LAMA1	ITGB4	ENSG00000101680	ENSG00000132470	MEP Young	MEP Young	MEP-MEP	MEP-L-LAMA1	MEP-R-ITGB4
LAMA1-SDC2	LAMA1	SDC2	ENSG00000101680	ENSG00000169439	MEP Young	MEP Young	MEP-MEP	MEP-L-LAMA1	MEP-R-SDC2
LAMA2-ITGA1	LAMA2	ITGA1	ENSG00000196569	ENSG00000213949	MEP Young	MEP Young	MEP-MEP	MEP-L-LAMA2	MEP-R-ITGA1
LAMA2-ITGA2	LAMA2	ITGA2	ENSG00000196569	ENSG00000164171	MEP Young	MEP Young	MEP-MEP	MEP-L-LAMA2	MEP-R-ITGA2
LAMA2-ITGA3	LAMA2	ITGA3	ENSG00000196569	ENSG00000005884	MEP Young	MEP Young	MEP-MEP	MEP-L-LAMA2	MEP-R-ITGA3
LAMA2-ITGA6	LAMA2	ITGA6	ENSG00000196569	ENSG00000091409	MEP Young	MEP Young	MEP-MEP	MEP-L-LAMA2	MEP-R-ITGA6
LAMA2-ITGB4	LAMA2	ITGB4	ENSG00000196569	ENSG00000132470	MEP Young	MEP Young	MEP-MEP	MEP-L-LAMA2	MEP-R-ITGB4
LAMA3-SDC2	LAMA3	SDC2	ENSG00000053747	ENSG00000169439	MEP Young	MEP Young	MEP-MEP	MEP-L-LAMA3	MEP-R-SDC2
LAMB3-COL17A1	LAMB3	COL17A1	ENSG00000196878	ENSG00000065618	MEP Young	MEP Young	MEP-MEP	MEP-L-LAMB3	MEP-R-COL17A1
LAMB3-ITGA2	LAMB3	ITGA2	ENSG00000196878	ENSG00000164171	MEP Young	MEP Young	MEP-MEP	MEP-L-LAMB3	MEP-R-ITGA2
LAMB3-ITGA3	LAMB3	ITGA3	ENSG00000196878	ENSG00000005884	MEP Young	MEP Young	MEP-MEP	MEP-L-LAMB3	MEP-R-ITGA3
LAMB3-ITGA6	LAMB3	ITGA6	ENSG00000196878	ENSG00000091409	MEP Young	MEP Young	MEP-MEP	MEP-L-LAMB3	MEP-R-ITGA6
LAMB3-ITGB4	LAMB3	ITGB4	ENSG00000196878	ENSG00000132470	MEP Young	MEP Young	MEP-MEP	MEP-L-LAMB3	MEP-R-ITGB4
MATN1-ITGA1	MATN1	ITGA1	ENSG00000162510	ENSG00000213949	MEP Young	MEP Young	MEP-MEP	MEP-L-MATN1	MEP-R-ITGA1
NID1-COL13A1	NID1	COL13A1	ENSG00000116962	ENSG00000197467	MEP Young	MEP Young	MEP-MEP	MEP-L-NID1	MEP-R-COL13A1
NID1-ITGA3	NID1	ITGA3	ENSG00000116962	ENSG00000005884	MEP Young	MEP Young	MEP-MEP	MEP-L-NID1	MEP-R-ITGA3
NID2-COL13A1	NID2	COL13A1	ENSG00000087303	ENSG00000197467	MEP Young	MEP Young	MEP-MEP	MEP-L-NID2	MEP-R-COL13A1
NRG1-GPC1	NRG1	GPC1	ENSG00000157168	ENSG00000063660	MEP Young	MEP Young	MEP-MEP	MEP-L-NRG1	MEP-R-GPC1
NTF4-NGFR	NTF4	NGFR	ENSG00000225950	ENSG00000064300	MEP Young	MEP Young	MEP-MEP	MEP-L-NTF4	MEP-R-NGFR
PGF-NELL1	PGF	NELL1	ENSG00000119630	ENSG00000099250	MEP Young	MEP Young	MEP-MEP	MEP-L-PGF	MEP-R-NELL1
PGF-NELL2	PGF	NELL2	ENSG00000119630	ENSG00000118257	MEP Young	MEP Young	MEP-MEP	MEP-L-PGF	MEP-R-NELL2
PLAU-ITGA3	PLAU	ITGA3	ENSG00000122861	ENSG00000005884	MEP Young	MEP Young	MEP-MEP	MEP-L-PLAU	MEP-R-ITGA3
PLTP-ABCA1	PLTP	ABCA1	ENSG00000100979	ENSG00000165029	MEP Young	MEP Young	MEP-MEP	MEP-L-PLTP	MEP-R-ABCA1
PROS1-AXL	PROS1	AXL	ENSG00000184500	ENSG00000167601	MEP Young	MEP Young	MEP-MEP	MEP-L-PROS1	MEP-R-AXL
PTN-PTPRS	PTN	PTPRS	ENSG00000105894	ENSG00000105426	MEP Young	MEP Young	MEP-MEP	MEP-L-PTN	MEP-R-PTPRS
PTN-PTPRZ1	PTN	PTPRZ1	ENSG00000105894	ENSG00000106278	MEP Young	MEP Young	MEP-MEP	MEP-L-PTN	MEP-R-PTPRZ1
PTN-SDC3	PTN	SDC3	ENSG00000105894	ENSG00000162512	MEP Young	MEP Young	MEP-MEP	MEP-L-PTN	MEP-R-SDC3
SEMA3D-NELL1	SEMA3D	NELL1	ENSG00000153993	ENSG00000099250	MEP Young	MEP Young	MEP-MEP	MEP-L-SEMA3D	MEP-R-NELL1
SEMA3F-NELL1	SEMA3F	NELL1	ENSG00000001617	ENSG00000099250	MEP Young	MEP Young	MEP-MEP	MEP-L-SEMA3F	MEP-R-NELL1
SEMA3F-NELL2	SEMA3F	NELL2	ENSG00000001617	ENSG00000118257	MEP Young	MEP Young	MEP-MEP	MEP-L-SEMA3F	MEP-R-NELL2
SEMA3G-NELL2	SEMA3G	NELL2	ENSG00000010319	ENSG00000118257	MEP Young	MEP Young	MEP-MEP	MEP-L-SEMA3G	MEP-R-NELL2
SEMA6D-TREM2	SEMA6D	TREM2	ENSG00000137872	ENSG00000095970	MEP Young	MEP Young	MEP-MEP	MEP-L-SEMA6D	MEP-R-TREM2
TGFB1-SDC2	TGFB1	SDC2	ENSG00000105329	ENSG00000169439	MEP Young	MEP Young	MEP-MEP	MEP-L-TGFB1	MEP-R-SDC2
TGFB1-TGFBR1	TGFB1	TGFBR1	ENSG00000105329	ENSG00000106799	MEP Young	MEP Young	MEP-MEP	MEP-L-TGFB1	MEP-R-TGFBR1
THBS2-ITGA6	THBS2	ITGA6	ENSG00000186340	ENSG00000091409	MEP Young	MEP Young	MEP-MEP	MEP-L-THBS2	MEP-R-ITGA6
THBS2-NOTCH4	THBS2	NOTCH4	ENSG00000186340	ENSG00000204301	MEP Young	MEP Young	MEP-MEP	MEP-L-THBS2	MEP-R-NOTCH4
VIM-CD44	VIM	CD44	ENSG00000026025	ENSG00000026508	MEP Young	MEP Young	MEP-MEP	MEP-L-VIM	MEP-R-CD44

## Sheet: B LRP DE MEP vs LEP Lost in Old
LigandReceptorPair	Ligand	Receptor	Ligand.EnsemblID	Receptor.EnsemblID	Ligand.CellType.AgeGroup	Receptor.CellType.AgeGroup	CellType.Interaction	Ligand.CellType.Gene	Receptor.CellType.Gene	DE.MvL.Status.Ligand	DE.MvL.Status.Receptor
ALOX5AP-ALOX5	ALOX5AP	ALOX5	ENSG00000132965	ENSG00000012779	LEP Young	LEP Young	LEP-LEP	LEP-L-ALOX5AP	LEP-R-ALOX5	DE Lost in Old	DE Maintained in Old
C3-C5AR2	C3	C5AR2	ENSG00000125730	ENSG00000134830	LEP Young	LEP Young	LEP-LEP	LEP-L-C3	LEP-R-C5AR2	DE Maintained in Old	DE Lost in Old
CD34-SELL	CD34	SELL	ENSG00000174059	ENSG00000188404	LEP Young	LEP Young	LEP-LEP	LEP-L-CD34	LEP-R-SELL	DE Lost in Old	DE Lost in Old
ENC1-CCR3	ENC1	CCR3	ENSG00000151882	ENSG00000183625	LEP Young	LEP Young	LEP-LEP	LEP-L-ENC1	LEP-R-CCR3	DE Maintained in Old	DE Lost in Old
HLA-A-ERBB2	HLA-A	ERBB2	ENSG00000206503	ENSG00000141736	LEP Young	LEP Young	LEP-LEP	LEP-L-HLA-A	LEP-R-ERBB2	DE Lost in Old	DE Maintained in Old
HLA-G-CD4	HLA-G	CD4	ENSG00000204632	ENSG00000010610	LEP Young	LEP Young	LEP-LEP	LEP-L-HLA-G	LEP-R-CD4	DE Lost in Old	DE Maintained in Old
IL15-IL2RG	IL15	IL2RG	ENSG00000164136	ENSG00000147168	LEP Young	LEP Young	LEP-LEP	LEP-L-IL15	LEP-R-IL2RG	DE Lost in Old	DE Maintained in Old
MMP9-ITGB2	MMP9	ITGB2	ENSG00000100985	ENSG00000160255	LEP Young	LEP Young	LEP-LEP	LEP-L-MMP9	LEP-R-ITGB2	DE Lost in Old	DE Maintained in Old
NRG4-ERBB2	NRG4	ERBB2	ENSG00000169752	ENSG00000141736	LEP Young	LEP Young	LEP-LEP	LEP-L-NRG4	LEP-R-ERBB2	DE Lost in Old	DE Maintained in Old
NTN1-UNC5A	NTN1	UNC5A	ENSG00000065320	ENSG00000113763	LEP Young	LEP Young	LEP-LEP	LEP-L-NTN1	LEP-R-UNC5A	DE Lost in Old	DE Maintained in Old
PIP-CD4	PIP	CD4	ENSG00000159763	ENSG00000010610	LEP Young	LEP Young	LEP-LEP	LEP-L-PIP	LEP-R-CD4	DE Lost in Old	DE Maintained in Old
PODXL-SELL	PODXL	SELL	ENSG00000128567	ENSG00000188404	LEP Young	LEP Young	LEP-LEP	LEP-L-PODXL	LEP-R-SELL	DE Maintained in Old	DE Lost in Old
PODXL2-SELL	PODXL2	SELL	ENSG00000114631	ENSG00000188404	LEP Young	LEP Young	LEP-LEP	LEP-L-PODXL2	LEP-R-SELL	DE Maintained in Old	DE Lost in Old
TNFSF11-BTF3P11	TNFSF11	BTF3P11	ENSG00000120659	ENSG00000164761	LEP Young	LEP Young	LEP-LEP	LEP-L-TNFSF11	LEP-R-BTF3P11	DE Lost in Old	DE Maintained in Old
TNFSF11-TNFRSF11A	TNFSF11	TNFRSF11A	ENSG00000120659	ENSG00000141655	LEP Young	LEP Young	LEP-LEP	LEP-L-TNFSF11	LEP-R-TNFRSF11A	DE Lost in Old	DE Maintained in Old
TNFSF13-TNFRSF14	TNFSF13	TNFRSF14	ENSG00000161955	ENSG00000157873	LEP Young	LEP Young	LEP-LEP	LEP-L-TNFSF13	LEP-R-TNFRSF14	DE Maintained in Old	DE Lost in Old
TNFSF14-TNFRSF14	TNFSF14	TNFRSF14	ENSG00000125735	ENSG00000157873	LEP Young	LEP Young	LEP-LEP	LEP-L-TNFSF14	LEP-R-TNFRSF14	DE Maintained in Old	DE Lost in Old
ADM2-CALCRL	ADM2	CALCRL	ENSG00000128165	ENSG00000064989	LEP Young	MEP Young	LEP-MEP	LEP-L-ADM2	MEP-R-CALCRL	DE Lost in Old	DE Maintained in Old
ADM2-RAMP1	ADM2	RAMP1	ENSG00000128165	ENSG00000132329	LEP Young	MEP Young	LEP-MEP	LEP-L-ADM2	MEP-R-RAMP1	DE Lost in Old	DE Maintained in Old
B2M-KLRC1	B2M	KLRC1	ENSG00000166710	ENSG00000134545	LEP Young	MEP Young	LEP-MEP	LEP-L-B2M	MEP-R-KLRC1	DE Lost in Old	DE Maintained in Old
EDN2-EDNRA	EDN2	EDNRA	ENSG00000127129	ENSG00000151617	LEP Young	MEP Young	LEP-MEP	LEP-L-EDN2	MEP-R-EDNRA	DE Lost in Old	DE Maintained in Old
FGF17-FGFR2	FGF17	FGFR2	ENSG00000158815	ENSG00000066468	LEP Young	MEP Young	LEP-MEP	LEP-L-FGF17	MEP-R-FGFR2	DE Lost in Old	DE Maintained in Old
FGF17-FGFR3	FGF17	FGFR3	ENSG00000158815	ENSG00000068078	LEP Young	MEP Young	LEP-MEP	LEP-L-FGF17	MEP-R-FGFR3	DE Lost in Old	DE Maintained in Old
GDF5-ROR2	GDF5	ROR2	ENSG00000125965	ENSG00000169071	LEP Young	MEP Young	LEP-MEP	LEP-L-GDF5	MEP-R-ROR2	DE Maintained in Old	DE Lost in Old
HLA-C-NOTCH4	HLA-C	NOTCH4	ENSG00000204525	ENSG00000204301	LEP Young	MEP Young	LEP-MEP	LEP-L-HLA-C	MEP-R-NOTCH4	DE Maintained in Old	DE Lost in Old
HLA-G-KLRC1	HLA-G	KLRC1	ENSG00000204632	ENSG00000134545	LEP Young	MEP Young	LEP-MEP	LEP-L-HLA-G	MEP-R-KLRC1	DE Lost in Old	DE Maintained in Old
LCP1-CD44	LCP1	CD44	ENSG00000175445	ENSG00000026508	LEP Young	MEP Young	LEP-MEP	LEP-L-LCP1	MEP-R-CD44	DE Lost in Old	DE Lost in Old
MMP7-CD44	MMP7	CD44	ENSG00000137673	ENSG00000026508	LEP Young	MEP Young	LEP-MEP	LEP-L-MMP7	MEP-R-CD44	DE Maintained in Old	DE Lost in Old
MMP9-CD44	MMP9	CD44	ENSG00000100985	ENSG00000026508	LEP Young	MEP Young	LEP-MEP	LEP-L-MMP9	MEP-R-CD44	DE Lost in Old	DE Lost in Old
NCAM1-CACNA1C	NCAM1	CACNA1C	ENSG00000149294	ENSG00000151067	LEP Young	MEP Young	LEP-MEP	LEP-L-NCAM1	MEP-R-CACNA1C	DE Lost in Old	DE Maintained in Old
NCAM1-FGFR2	NCAM1	FGFR2	ENSG00000149294	ENSG00000066468	LEP Young	MEP Young	LEP-MEP	LEP-L-NCAM1	MEP-R-FGFR2	DE Lost in Old	DE Maintained in Old
NRG4-EGFR	NRG4	EGFR	ENSG00000169752	ENSG00000146648	LEP Young	MEP Young	LEP-MEP	LEP-L-NRG4	MEP-R-EGFR	DE Lost in Old	DE Maintained in Old
NTN1-NEO1	NTN1	NEO1	ENSG00000065320	ENSG00000067141	LEP Young	MEP Young	LEP-MEP	LEP-L-NTN1	MEP-R-NEO1	DE Lost in Old	DE Maintained in Old
NTN1-UNC5D	NTN1	UNC5D	ENSG00000065320	ENSG00000156687	LEP Young	MEP Young	LEP-MEP	LEP-L-NTN1	MEP-R-UNC5D	DE Lost in Old	DE Maintained in Old
SEMA3B-NELL1	SEMA3B	NELL1	ENSG00000012171	ENSG00000099250	LEP Young	MEP Young	LEP-MEP	LEP-L-SEMA3B	MEP-R-NELL1	DE Lost in Old	DE Maintained in Old
SEMA3B-NELL2	SEMA3B	NELL2	ENSG00000012171	ENSG00000118257	LEP Young	MEP Young	LEP-MEP	LEP-L-SEMA3B	MEP-R-NELL2	DE Lost in Old	DE Maintained in Old
SPINK1-EGFR	SPINK1	EGFR	ENSG00000164266	ENSG00000146648	LEP Young	MEP Young	LEP-MEP	LEP-L-SPINK1	MEP-R-EGFR	DE Lost in Old	DE Maintained in Old
TNFSF13-FAS	TNFSF13	FAS	ENSG00000161955	ENSG00000026103	LEP Young	MEP Young	LEP-MEP	LEP-L-TNFSF13	MEP-R-FAS	DE Maintained in Old	DE Lost in Old
AHSG-INSR	AHSG	INSR	ENSG00000145192	ENSG00000171105	MEP Young	LEP Young	MEP-LEP	MEP-L-AHSG	LEP-R-INSR	DE Lost in Old	DE Maintained in Old
C5-C5AR2	C5	C5AR2	ENSG00000106804	ENSG00000134830	MEP Young	LEP Young	MEP-LEP	MEP-L-C5	LEP-R-C5AR2	DE Maintained in Old	DE Lost in Old
CFH-SELL	CFH	SELL	ENSG00000000971	ENSG00000188404	MEP Young	LEP Young	MEP-LEP	MEP-L-CFH	LEP-R-SELL	DE Maintained in Old	DE Lost in Old
CXCL11-CCR3	CXCL11	CCR3	ENSG00000169248	ENSG00000183625	MEP Young	LEP Young	MEP-LEP	MEP-L-CXCL11	LEP-R-CCR3	DE Lost in Old	DE Lost in Old
FGF19-KLB	FGF19	KLB	ENSG00000162344	ENSG00000134962	MEP Young	LEP Young	MEP-LEP	MEP-L-FGF19	LEP-R-KLB	DE Lost in Old	DE Maintained in Old
HRAS-INSR	HRAS	INSR	ENSG00000174775	ENSG00000171105	MEP Young	LEP Young	MEP-LEP	MEP-L-HRAS	LEP-R-INSR	DE Lost in Old	DE Maintained in Old
NTNG1-LRRC4C	NTNG1	LRRC4C	ENSG00000162631	ENSG00000148948	MEP Young	LEP Young	MEP-LEP	MEP-L-NTNG1	LEP-R-LRRC4C	DE Maintained in Old	DE Lost in Old
PTN-PLXNB2	PTN	PLXNB2	ENSG00000105894	ENSG00000196576	MEP Young	LEP Young	MEP-LEP	MEP-L-PTN	LEP-R-PLXNB2	DE Lost in Old	DE Maintained in Old
PTN-PTPRB	PTN	PTPRB	ENSG00000105894	ENSG00000127329	MEP Young	LEP Young	MEP-LEP	MEP-L-PTN	LEP-R-PTPRB	DE Lost in Old	DE Maintained in Old
UTS2-CRHR1	UTS2	CRHR1	ENSG00000145040	ENSG00000120088	MEP Young	LEP Young	MEP-LEP	MEP-L-UTS2	LEP-R-CRHR1	DE Maintained in Old	DE Lost in Old
COL1A2-CD44	COL1A2	CD44	ENSG00000164692	ENSG00000026508	MEP Young	MEP Young	MEP-MEP	MEP-L-COL1A2	MEP-R-CD44	DE Maintained in Old	DE Lost in Old
CXCL11-ACKR3	CXCL11	ACKR3	ENSG00000169248	ENSG00000144476	MEP Young	MEP Young	MEP-MEP	MEP-L-CXCL11	MEP-R-ACKR3	DE Lost in Old	DE Maintained in Old
DLL1-NOTCH4	DLL1	NOTCH4	ENSG00000198719	ENSG00000204301	MEP Young	MEP Young	MEP-MEP	MEP-L-DLL1	MEP-R-NOTCH4	DE Maintained in Old	DE Lost in Old
DLL3-NOTCH4	DLL3	NOTCH4	ENSG00000090932	ENSG00000204301	MEP Young	MEP Young	MEP-MEP	MEP-L-DLL3	MEP-R-NOTCH4	DE Maintained in Old	DE Lost in Old
FGF1-CD44	FGF1	CD44	ENSG00000113578	ENSG00000026508	MEP Young	MEP Young	MEP-MEP	MEP-L-FGF1	MEP-R-CD44	DE Lost in Old	DE Lost in Old
FGF1-EGFR	FGF1	EGFR	ENSG00000113578	ENSG00000146648	MEP Young	MEP Young	MEP-MEP	MEP-L-FGF1	MEP-R-EGFR	DE Lost in Old	DE Maintained in Old
FGF1-FGFR2	FGF1	FGFR2	ENSG00000113578	ENSG00000066468	MEP Young	MEP Young	MEP-MEP	MEP-L-FGF1	MEP-R-FGFR2	DE Lost in Old	DE Maintained in Old
FGF1-FGFR3	FGF1	FGFR3	ENSG00000113578	ENSG00000068078	MEP Young	MEP Young	MEP-MEP	MEP-L-FGF1	MEP-R-FGFR3	DE Lost in Old	DE Maintained in Old
FGF1-NELL1	FGF1	NELL1	ENSG00000113578	ENSG00000099250	MEP Young	MEP Young	MEP-MEP	MEP-L-FGF1	MEP-R-NELL1	DE Lost in Old	DE Maintained in Old
FGF19-FGFR2	FGF19	FGFR2	ENSG00000162344	ENSG00000066468	MEP Young	MEP Young	MEP-MEP	MEP-L-FGF19	MEP-R-FGFR2	DE Lost in Old	DE Maintained in Old
FGF19-FGFR3	FGF19	FGFR3	ENSG00000162344	ENSG00000068078	MEP Young	MEP Young	MEP-MEP	MEP-L-FGF19	MEP-R-FGFR3	DE Lost in Old	DE Maintained in Old
FGL1-EGFR	FGL1	EGFR	ENSG00000104760	ENSG00000146648	MEP Young	MEP Young	MEP-MEP	MEP-L-FGL1	MEP-R-EGFR	DE Lost in Old	DE Maintained in Old
FN1-CD44	FN1	CD44	ENSG00000115414	ENSG00000026508	MEP Young	MEP Young	MEP-MEP	MEP-L-FN1	MEP-R-CD44	DE Maintained in Old	DE Lost in Old
FN1-COL13A1	FN1	COL13A1	ENSG00000115414	ENSG00000197467	MEP Young	MEP Young	MEP-MEP	MEP-L-FN1	MEP-R-COL13A1	DE Maintained in Old	DE Lost in Old
HAS2-CD44	HAS2	CD44	ENSG00000170961	ENSG00000026508	MEP Young	MEP Young	MEP-MEP	MEP-L-HAS2	MEP-R-CD44	DE Maintained in Old	DE Lost in Old
HBEGF-CD44	HBEGF	CD44	ENSG00000113070	ENSG00000026508	MEP Young	MEP Young	MEP-MEP	MEP-L-HBEGF	MEP-R-CD44	DE Maintained in Old	DE Lost in Old
HRAS-SDC2	HRAS	SDC2	ENSG00000174775	ENSG00000169439	MEP Young	MEP Young	MEP-MEP	MEP-L-HRAS	MEP-R-SDC2	DE Lost in Old	DE Maintained in Old
JAG2-NOTCH4	JAG2	NOTCH4	ENSG00000184916	ENSG00000204301	MEP Young	MEP Young	MEP-MEP	MEP-L-JAG2	MEP-R-NOTCH4	DE Maintained in Old	DE Lost in Old
MATN1-ITGA1	MATN1	ITGA1	ENSG00000162510	ENSG00000213949	MEP Young	MEP Young	MEP-MEP	MEP-L-MATN1	MEP-R-ITGA1	DE Lost in Old	DE Maintained in Old
NID1-COL13A1	NID1	COL13A1	ENSG00000116962	ENSG00000197467	MEP Young	MEP Young	MEP-MEP	MEP-L-NID1	MEP-R-COL13A1	DE Maintained in Old	DE Lost in Old
NID2-COL13A1	NID2	COL13A1	ENSG00000087303	ENSG00000197467	MEP Young	MEP Young	MEP-MEP	MEP-L-NID2	MEP-R-COL13A1	DE Maintained in Old	DE Lost in Old
PTN-PTPRS	PTN	PTPRS	ENSG00000105894	ENSG00000105426	MEP Young	MEP Young	MEP-MEP	MEP-L-PTN	MEP-R-PTPRS	DE Lost in Old	DE Maintained in Old
PTN-PTPRZ1	PTN	PTPRZ1	ENSG00000105894	ENSG00000106278	MEP Young	MEP Young	MEP-MEP	MEP-L-PTN	MEP-R-PTPRZ1	DE Lost in Old	DE Maintained in Old
PTN-SDC3	PTN	SDC3	ENSG00000105894	ENSG00000162512	MEP Young	MEP Young	MEP-MEP	MEP-L-PTN	MEP-R-SDC3	DE Lost in Old	DE Maintained in Old
THBS2-NOTCH4	THBS2	NOTCH4	ENSG00000186340	ENSG00000204301	MEP Young	MEP Young	MEP-MEP	MEP-L-THBS2	MEP-R-NOTCH4	DE Maintained in Old	DE Lost in Old
VIM-CD44	VIM	CD44	ENSG00000026025	ENSG00000026508	MEP Young	MEP Young	MEP-MEP	MEP-L-VIM	MEP-R-CD44	DE Maintained in Old	DE Lost in Old
