# Supplementary material for: Luminal epithelial cells integrate variable responses to aging into stereotypical changes that underlie breast cancer susceptibility
Source: eLife. 2024 Nov 15;13:e95720. doi: 10.7554/eLife.95720 (PMC11723586; doi:10.7554/eLife.95720)
Supplement: Figure 3—source data 1. — (A–B) Age-dependent Old vs. Young DE in (A) LEPs and (B) MEPs (adj. p<0.05; (+) lfc higher in old, (-) lfc higher in young). (C–D) Age-dependent Old vs. Young DV in (C) LEPs and (D) MEPs (adj. p<0.05; (+) lfc higher in old, (-) lfc higher in young). [file elife-95720-fig3-data1.xlsx]

## Sheet: A DE Old vs Young in LEP
EnsemblID	EnsDb.Hsapiens.v86.GeneSYM	EnsDb.Hsapiens.v86.EntrezID	EnsDb.Hsapiens.v86.UniprotID	EnsemblID.GeneSYM	logFC	AveExpr	t	P.Value	adj.P.Val	B
ENSG00000164125	FAM198B	51313	Q6UWH4	ENSG00000164125_FAM198B	1.85715	4.74628	9.77896	3.77371e-13	6.53908e-09	19.7397
ENSG00000021826	CPS1	1373	C9JTA4	ENSG00000021826_CPS1	1.30128	5.13472	7.5829	7.84196e-10	6.79427e-06	12.3259
ENSG00000183092	BEGAIN	57596	NA	ENSG00000183092_BEGAIN	1.47754	1.65471	7.17029	3.42618e-09	9.89481e-06	10.6636
ENSG00000114861	FOXP1	27086	Q9H334	ENSG00000114861_FOXP1	0.776346	6.56261	7.19292	3.15955e-09	9.89481e-06	10.8747
ENSG00000136490	LIMD2	80774	Q9BT23	ENSG00000136490_LIMD2	-1.48675	1.47075	-7.20042	3.07588e-09	9.89481e-06	10.5795
ENSG00000117507	FMO6P	388714	NA	ENSG00000117507_FMO6P	-2.64778	-4.14632	-7.25933	2.49114e-09	9.89481e-06	8.14495
ENSG00000168016	TRANK1	9881	O15050	ENSG00000168016_TRANK1	-2.07086	1.6009	-7.11145	4.22994e-09	1.04709e-05	10.5636
ENSG00000165655	ZNF503	84858	Q96F45	ENSG00000165655_ZNF503	1.41735	3.78177	6.88966	9.36684e-09	2.02886e-05	9.92622
ENSG00000168447	SCNN1B	6338	NA	ENSG00000168447_SCNN1B	1.16514	2.01942	6.75649	1.51002e-08	2.61657e-05	9.40885
ENSG00000205542	TMSB4X	7114	P62328	ENSG00000205542_TMSB4X	-0.800816	7.05906	-6.77569	1.40956e-08	2.61657e-05	9.35691
ENSG00000186350	RXRA	6256	NA	ENSG00000186350_RXRA	0.550826	6.31455	6.60598	2.59057e-08	4.08086e-05	8.82434
ENSG00000121297	TSHZ3	57616	Q63HK5	ENSG00000121297_TSHZ3	1.55222	3.4714	6.50462	3.72549e-08	5.37961e-05	8.57842
ENSG00000076716	GPC4	2239	O75487	ENSG00000076716_GPC4	-2.73387	2.92192	-6.36539	6.13441e-08	8.1767e-05	8.02505
ENSG00000186847	KRT14	3861	P02533	ENSG00000186847_KRT14	1.44329	11.3671	6.31653	7.3067e-08	9.0436e-05	7.70683
ENSG00000154133	ROBO4	54538	Q8WZ75	ENSG00000154133_ROBO4	1.32474	2.09153	6.13124	1.41694e-07	0.000153455	7.32122
ENSG00000166920	C15orf48	100126311	Q9C002	ENSG00000166920_C15orf48	-1.3198	2.17461	-6.14231	1.36202e-07	0.000153455	7.27147
ENSG00000137699	TRIM29	23650	Q14134	ENSG00000137699_TRIM29	0.841309	8.60744	5.92358	2.97006e-07	0.000272133	6.33512
ENSG00000108960	MMD	23531	Q15546	ENSG00000108960_MMD	-1.0081	3.60601	-5.93372	2.86484e-07	0.000272133	6.67222
ENSG00000254726	MEX3A	92312	A1L020	ENSG00000254726_MEX3A	-1.27733	3.91711	-5.92227	2.98392e-07	0.000272133	6.60971
ENSG00000203697	CAPN8	388743	H0YEQ4	ENSG00000203697_CAPN8	1.87904	1.83845	5.89349	3.30538e-07	0.000286378	6.5053
ENSG00000248429	RP11-597D13.9	NA	NA	ENSG00000248429_RP11-597D13.9	1.38254	2.65861	5.77268	5.0756e-07	0.000408364	6.14344
ENSG00000203688	RP11-351J23.1	441178	NA	ENSG00000203688_RP11-351J23.1	-2.18995	-3.65159	-5.76668	5.18467e-07	0.000408364	4.82003
ENSG00000163762	TM4SF18	116441	Q96CE8	ENSG00000163762_TM4SF18	-3.63423	-1.31968	-5.74851	5.5295e-07	0.000416588	5.94753
ENSG00000168060	NAALADL1	10004	H0YDS5	ENSG00000168060_NAALADL1	1.46227	0.770261	5.70572	6.4339e-07	0.000463204	5.53477
ENSG00000135374	ELF5	2001	Q9UKW6	ENSG00000135374_ELF5	-2.49785	0.404607	-5.69499	6.68288e-07	0.000463204	5.87603
ENSG00000130598	TNNI2	7136	P48788	ENSG00000130598_TNNI2	1.3789	3.40878	5.6185	8.75698e-07	0.000523245	5.60346
ENSG00000178163	ZNF518B	85460	Q9C0D4	ENSG00000178163_ZNF518B	-0.479025	5.75084	-5.63981	8.12235e-07	0.000523245	5.46297
ENSG00000090924	PLEKHG2	64857	Q9H7P9	ENSG00000090924_PLEKHG2	-0.901787	4.57034	-5.63722	8.19687e-07	0.000523245	5.57863
ENSG00000142102	PGGHG	80162	NA	ENSG00000142102_PGGHG	-1.1463	2.96969	-5.62109	8.67718e-07	0.000523245	5.56757
ENSG00000233766	AC098617.1	NA	NA	ENSG00000233766_AC098617.1	1.96256	-1.26049	5.57453	1.02263e-06	0.000590673	4.66482
ENSG00000135378	PRRG4	79056	Q9BZD6	ENSG00000135378_PRRG4	0.450381	6.10736	5.55769	1.08513e-06	0.000606554	5.12742
ENSG00000213390	ARHGAP19	84986	R4GMS4	ENSG00000213390_ARHGAP19	0.540044	4.95658	5.51301	1.27002e-06	0.000666875	5.0941
ENSG00000167528	ZNF641	121274	Q96N77	ENSG00000167528_ZNF641	-0.501556	4.40724	-5.52093	1.2351e-06	0.000666875	5.16332
ENSG00000100234	TIMP3	7078	P35625	ENSG00000100234_TIMP3	1.64364	7.64209	5.47886	1.43203e-06	0.000729832	4.85954
ENSG00000111885	MAN1A1	4121	P33908	ENSG00000111885_MAN1A1	-1.67377	3.84076	-5.47017	1.47645e-06	0.000730967	5.1242
ENSG00000154237	LRRK1	79705	Q38SD2	ENSG00000154237_LRRK1	0.563857	5.28679	5.44541	1.61052e-06	0.000759387	4.83457
ENSG00000162444	RBP7	116362	B1AQ60	ENSG00000162444_RBP7	-1.59573	-0.552794	-5.44348	1.6215e-06	0.000759387	4.71049
ENSG00000128298	BAIAP2L2	80115	Q6UXY1	ENSG00000128298_BAIAP2L2	1.12278	2.64297	5.4211	1.75394e-06	0.000795589	4.97715
ENSG00000118257	NRP2	8828	NA	ENSG00000118257_NRP2	0.90342	6.72939	5.41226	1.80914e-06	0.000795589	4.6242
ENSG00000187091	PLCD1	5333	NA	ENSG00000187091_PLCD1	0.83725	5.90649	5.40797	1.83654e-06	0.000795589	4.64368
ENSG00000198467	TPM2	7169	Q5TCU8	ENSG00000198467_TPM2	0.921432	7.38146	5.34713	2.27258e-06	0.000868388	4.38418
ENSG00000164070	HSPA4L	22824	O95757	ENSG00000164070_HSPA4L	0.537903	7.21354	5.36419	2.14086e-06	0.000868388	4.43101
ENSG00000138735	PDE5A	8654	O76074	ENSG00000138735_PDE5A	-1.01551	3.10441	-5.34414	2.29647e-06	0.000868388	4.70407
ENSG00000180891	CUEDC1	404093	Q9NWM3	ENSG00000180891_CUEDC1	-1.75481	3.21587	-5.34683	2.27497e-06	0.000868388	4.72102
ENSG00000147485	PXDNL	137902	K4DIA6	ENSG00000147485_PXDNL	-2.17026	-2.24161	-5.35878	2.18181e-06	0.000868388	4.24451
ENSG00000266718	RP11-466A19.1	NA	NA	ENSG00000266718_RP11-466A19.1	-2.32273	-4.4228	-5.34304	2.30528e-06	0.000868388	3.28671
ENSG00000072201	LNX1	84708	Q8TBB1	ENSG00000072201_LNX1	-1.20239	1.36903	-5.32331	2.46983e-06	0.00091058	4.65348
ENSG00000129194	SOX15	6665	O60248	ENSG00000129194_SOX15	1.19877	4.6924	5.31166	2.57241e-06	0.000928641	4.54347
ENSG00000108602	ALDH3A1	218	E9PNN6	ENSG00000108602_ALDH3A1	1.75858	0.241387	5.28098	2.86313e-06	0.0010125	4.28243
ENSG00000102038	SMARCA1	6594	NA	ENSG00000102038_SMARCA1	-1.36801	4.94943	-5.26938	2.98137e-06	0.00103322	4.37947
ENSG00000133321	RARRES3	5920	NA	ENSG00000133321_RARRES3	-1.47444	2.48631	-5.2418	3.28209e-06	0.00111514	4.30791
ENSG00000101849	TBL1X	6907	C9JP56	ENSG00000101849_TBL1X	-1.79165	1.78102	-5.2237	3.49551e-06	0.00116481	4.3321
ENSG00000112761	WISP3	8838	O95389	ENSG00000112761_WISP3	1.60681	2.40487	5.20747	3.6984e-06	0.00120917	4.27366
ENSG00000143147	GPR161	23432	Q8N6U8	ENSG00000143147_GPR161	-0.73293	4.11423	-5.18738	3.96583e-06	0.00127259	4.1668
ENSG00000164520	RAET1E	135250	Q8TD07	ENSG00000164520_RAET1E	1.3416	3.06878	5.17461	4.14567e-06	0.00130611	4.17406
ENSG00000121281	ADCY7	113	I3L3Q5	ENSG00000121281_ADCY7	-0.834314	4.81192	-5.1478	4.54976e-06	0.00140783	3.83394
ENSG00000159788	RGS12	6002	NA	ENSG00000159788_RGS12	0.441814	5.49402	5.11443	5.10744e-06	0.00155266	3.72648
ENSG00000266928	CTB-70G10.1	NA	NA	ENSG00000266928_CTB-70G10.1	2.0616	-4.40354	5.10736	5.23396e-06	0.00156369	2.83265
ENSG00000166710	B2M	567	P61769	ENSG00000166710_B2M	-0.523702	9.14024	-5.09693	5.42622e-06	0.00159365	3.48119
ENSG00000131711	MAP1B	4131	D6RGJ3	ENSG00000131711_MAP1B	-1.35291	5.56658	-5.0638	6.0845e-06	0.0017572	3.55689
ENSG00000232677	LINC00665	100506930	NA	ENSG00000232677_LINC00665	0.804787	4.93569	5.04902	6.40309e-06	0.0018189	3.52264
ENSG00000166126	AMN	81693	Q9BXJ7	ENSG00000166126_AMN	-1.36749	0.0817999	-5.04335	6.52965e-06	0.00182493	3.73397
ENSG00000118596	SLC16A7	9194	O60669	ENSG00000118596_SLC16A7	0.82402	4.41574	5.03375	6.74935e-06	0.00185639	3.5598
ENSG00000144810	COL8A1	1295	NA	ENSG00000144810_COL8A1	-2.61471	3.34461	-5.01965	7.08545e-06	0.00191838	3.66976
ENSG00000157150	TIMP4	7079	Q99727	ENSG00000157150_TIMP4	-2.47853	-3.75354	-5.01282	7.25407e-06	0.00193382	2.58403
ENSG00000134775	FHOD3	80206	Q2V2M9	ENSG00000134775_FHOD3	-0.940918	5.79906	-5.00776	7.38165e-06	0.00193802	3.37294
ENSG00000100092	SH3BP1	23616	Q9Y3L3	ENSG00000100092_SH3BP1	0.407833	6.11436	4.96707	8.49073e-06	0.00216134	3.18681
ENSG00000118707	TGIF2	60436	Q9GZN2	ENSG00000118707_TGIF2	-0.340918	5.06813	-4.96406	8.57881e-06	0.00216134	3.22368
ENSG00000169231	THBS3	7059	NA	ENSG00000169231_THBS3	-0.820453	4.21357	-4.95894	8.73119e-06	0.00216134	3.29384
ENSG00000071282	LMCD1	29995	Q9NZU5	ENSG00000071282_LMCD1	-1.36943	2.22504	-4.95999	8.69963e-06	0.00216134	3.4481
ENSG00000115414	FN1	2335	P02751	ENSG00000115414_FN1	-2.35036	10.0663	-4.93342	9.53024e-06	0.00232592	2.95854
ENSG00000171840	NINJ2	4815	Q9NZG7	ENSG00000171840_NINJ2	-2.3655	-3.90657	-4.9244	9.8297e-06	0.00236568	2.33472
ENSG00000234614	AL450992.2	NA	NA	ENSG00000234614_AL450992.2	1.36708	1.83236	4.91717	1.00764e-05	0.00239183	3.34469
ENSG00000151240	DIP2C	22982	Q9Y2E4	ENSG00000151240_DIP2C	-2.25934	1.31009	-4.89403	1.0907e-05	0.00255401	3.22837
ENSG00000177380	PPFIA3	8541	O75145	ENSG00000177380_PPFIA3	-0.950201	2.05187	-4.86275	1.21382e-05	0.00280441	3.17794
ENSG00000122644	ARL4A	10124	P40617	ENSG00000122644_ARL4A	0.913249	4.92377	4.84299	1.2985e-05	0.00296059	2.80644
ENSG00000267575	CTC-459F4.3	101927151	NA	ENSG00000267575_CTC-459F4.3	0.937443	3.92185	4.82748	1.36905e-05	0.00304139	2.879
ENSG00000170542	SERPINB9	5272	P50453	ENSG00000170542_SERPINB9	-0.97303	2.50334	-4.82893	1.3623e-05	0.00304139	2.92724
ENSG00000154122	ANKH	56172	Q9HCJ1	ENSG00000154122_ANKH	0.548823	6.10303	4.79029	1.55389e-05	0.00340832	2.58665
ENSG00000135547	HEY2	23493	Q5TF93	ENSG00000135547_HEY2	-1.98236	-1.9558	-4.78547	1.57955e-05	0.0034213	2.50537
ENSG00000172965	MIR4435-2HG	541471	NA	ENSG00000172965_MIR4435-2HG	-0.541439	4.8417	-4.77267	1.64976e-05	0.00352927	2.57988
ENSG00000145287	PLAC8	51316	Q9NZF1	ENSG00000145287_PLAC8	1.57852	0.159673	4.74915	1.78692e-05	0.00353423	2.76807
ENSG00000213853	EMP2	2013	P54851	ENSG00000213853_EMP2	0.610976	7.22031	4.74451	1.81525e-05	0.00353423	2.34146
ENSG00000100036	SLC35E4	339665	Q6ICL7	ENSG00000100036_SLC35E4	0.585615	3.54254	4.75183	1.77071e-05	0.00353423	2.74126
ENSG00000076770	MBNL3	55796	B1AKI6	ENSG00000076770_MBNL3	0.489392	5.03632	4.75702	1.73981e-05	0.00353423	2.53685
ENSG00000257093	KIAA1147	57189	A4D1U4	ENSG00000257093_KIAA1147	-0.350556	6.32295	-4.7509	1.77631e-05	0.00353423	2.37901
ENSG00000127990	SGCE	8910	H0YC75	ENSG00000127990_SGCE	-0.638199	5.30483	-4.76572	1.6892e-05	0.00353423	2.63071
ENSG00000095321	CRAT	1384	P43155	ENSG00000095321_CRAT	-1.04809	3.46588	-4.74692	1.80047e-05	0.00353423	2.64938
ENSG00000153956	CACNA2D1	781	P54289	ENSG00000153956_CACNA2D1	-1.87279	3.06958	-4.75937	1.72597e-05	0.00353423	2.85309
ENSG00000158747	NBL1	4681	A3KFI4	ENSG00000158747_NBL1	0.439328	4.84285	4.7332	1.8862e-05	0.00359074	2.4956
ENSG00000136451	VEZF1	7716	J9JIC7	ENSG00000136451_VEZF1	-0.34148	5.35527	-4.73005	1.90644e-05	0.00359074	2.43581
ENSG00000253217	KB-1991G8.1	NA	NA	ENSG00000253217_KB-1991G8.1	-1.98948	-4.41578	-4.73011	1.90606e-05	0.00359074	1.88873
ENSG00000184178	SCFD2	152579	Q8WU76	ENSG00000184178_SCFD2	0.34864	5.02842	4.69478	2.14813e-05	0.00400245	2.35727
ENSG00000100078	PLA2G3	50487	Q9NZ20	ENSG00000100078_PLA2G3	-2.24639	-1.30933	-4.68192	2.2435e-05	0.00413567	2.42057
ENSG00000160886	LY6K	54742	Q17RY6	ENSG00000160886_LY6K	1.606	4.0399	4.67235	2.31722e-05	0.00421631	2.46719
ENSG00000160691	SHC1	6464	P29353	ENSG00000160691_SHC1	0.524242	8.7188	4.66997	2.33591e-05	0.00421631	2.07595
ENSG00000183914	DNAH2	146754	Q9P225	ENSG00000183914_DNAH2	0.909625	2.2878	4.66543	2.37192e-05	0.00423257	2.55511
ENSG00000121057	AKAP1	8165	I3L2N7	ENSG00000121057_AKAP1	0.352864	6.50543	4.66271	2.39377e-05	0.00423257	2.10398
ENSG00000188290	HES4	57801	E9PB28	ENSG00000188290_HES4	-0.671997	2.65059	-4.65603	2.44837e-05	0.00428539	2.26705
ENSG00000213420	GPC2	221914	Q8N158	ENSG00000213420_GPC2	-1.2395	0.0301099	-4.65164	2.4848e-05	0.00430566	2.40439
ENSG00000197580	BCO2	83875	Q9BYV7	ENSG00000197580_BCO2	1.55599	1.3557	4.64546	2.53713e-05	0.00435282	2.49498
ENSG00000175793	SFN	2810	P31947	ENSG00000175793_SFN	0.464788	9.95742	4.63799	2.60174e-05	0.00439172	1.95767
ENSG00000111846	GCNT2	2651	B7ZBL3	ENSG00000111846_GCNT2	-0.676968	2.29624	-4.63699	2.6105e-05	0.00439172	2.14696
ENSG00000121039	RDH10	157506	Q8IZV5	ENSG00000121039_RDH10	-0.69758	5.3209	-4.63385	2.63827e-05	0.00439576	2.06506
ENSG00000118402	ELOVL4	6785	Q9GZR5	ENSG00000118402_ELOVL4	-0.734275	4.21171	-4.61974	2.76653e-05	0.00456557	2.24656
ENSG00000164318	EGFLAM	133584	Q63HQ2	ENSG00000164318_EGFLAM	1.61821	3.0946	4.6151	2.81005e-05	0.00459364	2.36957
ENSG00000106484	MEST	4232	Q5EB52	ENSG00000106484_MEST	1.01007	7.03523	4.59728	2.98342e-05	0.00483147	1.88822
ENSG00000148908	RGS10	6001	O43665	ENSG00000148908_RGS10	-0.521485	5.10433	-4.59068	3.05031e-05	0.00489405	1.97581
ENSG00000115457	IGFBP2	3485	C9JW52	ENSG00000115457_IGFBP2	1.27701	6.98322	4.58665	3.09186e-05	0.0049152	1.92977
ENSG00000166619	BLCAP	10904	NA	ENSG00000166619_BLCAP	0.332153	7.00393	4.58044	3.15685e-05	0.0049729	1.83197
ENSG00000072210	ALDH3A2	224	C9JGJ2	ENSG00000072210_ALDH3A2	0.370112	7.02843	4.54961	3.50033e-05	0.00546429	1.72079
ENSG00000105538	RASIP1	54922	NA	ENSG00000105538_RASIP1	1.17552	3.9294	4.54663	3.5355e-05	0.00546992	2.05822
ENSG00000233608	TWIST2	117581	Q8WVJ9	ENSG00000233608_TWIST2	1.22481	1.36613	4.53685	3.65298e-05	0.00555253	2.14434
ENSG00000162623	TYW3	127253	Q6IPR3	ENSG00000162623_TYW3	0.353969	5.79241	4.53746	3.64559e-05	0.00555253	1.7565
ENSG00000223865	HLA-DPB1	3115	P04440	ENSG00000223865_HLA-DPB1	2.67034	0.746668	4.52438	3.80844e-05	0.0056319	2.06344
ENSG00000163082	SGPP2	130367	Q8IWX5	ENSG00000163082_SGPP2	0.992527	2.09218	4.52872	3.75356e-05	0.0056319	1.91182
ENSG00000147872	PLIN2	123	NA	ENSG00000147872_PLIN2	-0.712602	4.60681	-4.52317	3.82386e-05	0.0056319	1.80084
ENSG00000156413	FUT6	2528	P51993	ENSG00000156413_FUT6	-1.65796	-2.43645	-4.52228	3.83521e-05	0.0056319	1.97569
ENSG00000170571	EMB	133418	Q6PCB8	ENSG00000170571_EMB	0.531617	6.96316	4.50195	4.10445e-05	0.00597664	1.56867
ENSG00000189067	LITAF	9516	Q99732	ENSG00000189067_LITAF	-0.460108	8.45723	-4.48827	4.29589e-05	0.00620327	1.47915
ENSG00000167676	PLIN4	729359	A0A0J9YXN7	ENSG00000167676_PLIN4	1.15659	2.47196	4.47048	4.55793e-05	0.00642112	1.95522
ENSG00000197565	COL4A6	1288	Q14031	ENSG00000197565_COL4A6	0.920738	5.37692	4.47404	4.50433e-05	0.00642112	1.76074
ENSG00000182463	TSHZ2	128553	Q9NRE2	ENSG00000182463_TSHZ2	0.872061	5.38743	4.47264	4.52533e-05	0.00642112	1.58756
ENSG00000167785	ZNF558	148156	Q96NG5	ENSG00000167785_ZNF558	-0.536088	4.20839	-4.46428	4.65291e-05	0.00650206	1.6917
ENSG00000049130	KITLG	4254	NA	ENSG00000049130_KITLG	0.728774	5.8949	4.44113	5.02477e-05	0.00685584	1.49177
ENSG00000261824	LINC00662	148189	NA	ENSG00000261824_LINC00662	0.723432	4.46398	4.44391	4.97864e-05	0.00685584	1.55288
ENSG00000165801	ARHGEF40	55701	Q8TER5	ENSG00000165801_ARHGEF40	-1.35629	2.88342	-4.44278	4.99735e-05	0.00685584	1.86869
ENSG00000154645	CHODL	140578	Q9H9P2	ENSG00000154645_CHODL	-2.07024	-2.90357	-4.43665	5.10011e-05	0.00690428	1.45682
ENSG00000170919	TPT1-AS1	NA	NA	ENSG00000170919_TPT1-AS1	-1.05167	2.87497	-4.43008	5.21234e-05	0.0070015	1.68547
ENSG00000196730	DAPK1	1612	P53355	ENSG00000196730_DAPK1	-1.0073	4.01688	-4.42678	5.2698e-05	0.00702424	1.42577
ENSG00000003096	KLHL13	90293	A0A0C4DG99	ENSG00000003096_KLHL13	1.47279	3.83893	4.42024	5.38523e-05	0.0071233	1.76497
ENSG00000165548	TMEM63C	57156	G3V2V1	ENSG00000165548_TMEM63C	1.21386	3.95753	4.40769	5.61383e-05	0.00727	1.57993
ENSG00000136114	THSD1	55901	Q9NS62	ENSG00000136114_THSD1	0.858384	3.58093	4.3952	5.85052e-05	0.00727	1.70511
ENSG00000134757	DSG3	1830	P32926	ENSG00000134757_DSG3	0.733181	8.83066	4.40519	5.66048e-05	0.00727	1.20955
ENSG00000137843	PAK6	106821730	H0YM99	ENSG00000137843_PAK6	0.546282	3.65399	4.40166	5.72681e-05	0.00727	1.64548
ENSG00000081760	AACS	65985	Q86V21	ENSG00000081760_AACS	-0.240626	6.99873	-4.39185	5.91568e-05	0.00727	1.20138
ENSG00000185619	PCGF3	10336	C9JGV3	ENSG00000185619_PCGF3	-0.321659	6.42423	-4.39558	5.84316e-05	0.00727	1.23614
ENSG00000131941	RHPN2	85415	NA	ENSG00000131941_RHPN2	-0.552377	4.16635	-4.39287	5.89582e-05	0.00727	1.35313
ENSG00000188130	MAPK12	6300	NA	ENSG00000188130_MAPK12	-0.726246	2.969	-4.39656	5.82436e-05	0.00727	1.65028
ENSG00000120708	TGFBI	7045	Q15582	ENSG00000120708_TGFBI	-1.21994	9.38124	-4.41044	5.56286e-05	0.00727	1.22153
ENSG00000169752	NRG4	145957	NA	ENSG00000169752_NRG4	-1.86866	0.324304	-4.40258	5.70943e-05	0.00727	1.72035
ENSG00000187840	EIF4EBP1	1978	Q13541	ENSG00000187840_EIF4EBP1	-0.44595	6.40097	-4.37898	6.17279e-05	0.00753254	1.19415
ENSG00000251381	LINC00958	100506305	NA	ENSG00000251381_LINC00958	2.20225	2.7814	4.36937	6.3716e-05	0.00754479	1.63389
ENSG00000122863	CHST3	9469	Q7LGC8	ENSG00000122863_CHST3	0.442901	7.12892	4.37135	6.3301e-05	0.00754479	1.13957
ENSG00000160999	SH2B2	10603	A0A087X016	ENSG00000160999_SH2B2	-0.834404	0.555983	-4.37153	6.32646e-05	0.00754479	1.66677
ENSG00000123612	ACVR1C	130399	Q8NER5	ENSG00000123612_ACVR1C	-1.30401	-0.00952222	-4.36642	6.43396e-05	0.00754479	1.65163
ENSG00000227220	RP11-69I8.3	NA	NA	ENSG00000227220_RP11-69I8.3	-1.69548	-2.08627	-4.37381	6.27902e-05	0.00754479	1.31975
ENSG00000236008	AC011747.4	101929567	NA	ENSG00000236008_AC011747.4	-2.15539	-4.38235	-4.36594	6.44407e-05	0.00754479	0.94824
ENSG00000026950	BTN3A1	11119	O00481	ENSG00000026950_BTN3A1	-0.549491	3.99826	-4.36147	6.5399e-05	0.00760378	1.40372
ENSG00000069812	HES2	54626	Q9Y543	ENSG00000069812_HES2	-0.857097	6.12378	-4.35951	6.58222e-05	0.00760378	1.15147
ENSG00000078269	SYNJ2	8871	O15056	ENSG00000078269_SYNJ2	-0.419008	6.59115	-4.35659	6.64591e-05	0.00762651	1.11112
ENSG00000177426	TGIF1	7050	F8VWK5	ENSG00000177426_TGIF1	-0.282496	6.44991	-4.33823	7.06008e-05	0.00802767	1.06008
ENSG00000257588	RP11-469H8.6	101927318	NA	ENSG00000257588_RP11-469H8.6	-1.38501	-3.7088	-4.33703	7.08814e-05	0.00802767	1.12324
ENSG00000125827	TMX4	56255	Q9H1E5	ENSG00000125827_TMX4	0.429221	6.60449	4.32854	7.28879e-05	0.00817919	1.04149
ENSG00000189266	PNRC2	55629	NA	ENSG00000189266_PNRC2	0.306471	5.80076	4.32451	7.38607e-05	0.00817919	1.07467
ENSG00000160310	PRMT2	3275	P55345	ENSG00000160310_PRMT2	-0.242878	6.37925	-4.3235	7.41074e-05	0.00817919	1.02513
ENSG00000175309	PHYKPL	85007	Q8IUZ5	ENSG00000175309_PHYKPL	-0.527487	4.27674	-4.32549	7.36228e-05	0.00817919	1.2446
ENSG00000182272	B4GALNT4	338707	NA	ENSG00000182272_B4GALNT4	-0.716917	3.59446	-4.30494	7.87631e-05	0.00858369	1.0924
ENSG00000162946	DISC1	27185	Q9NRI5	ENSG00000162946_DISC1	-1.24995	-0.801011	-4.30589	7.85181e-05	0.00858369	1.35504
ENSG00000108669	CYTH1	9267	Q15438	ENSG00000108669_CYTH1	-0.407896	5.63452	-4.29172	8.22543e-05	0.00890814	0.977145
ENSG00000141258	SGSM2	9905	I3L1Y7	ENSG00000141258_SGSM2	-0.500729	5.60183	-4.28897	8.30001e-05	0.00893308	0.926137
ENSG00000185989	RASA3	22821	Q14644	ENSG00000185989_RASA3	-0.831956	2.98101	-4.28193	8.49364e-05	0.00908504	1.33278
ENSG00000197757	HOXC6	3223	D6RBH4	ENSG00000197757_HOXC6	0.559071	2.74518	4.26568	8.95748e-05	0.00952241	1.29369
ENSG00000102931	ARL2BP	23568	Q9Y2Y0	ENSG00000102931_ARL2BP	0.272064	6.51517	4.2598	9.13148e-05	0.00964819	0.81925
ENSG00000206195	DUXAP8	642477	NA	ENSG00000206195_DUXAP8	1.40351	-0.04382	4.2505	9.41318e-05	0.00988555	1.2471
ENSG00000182568	SATB1	6304	Q01826	ENSG00000182568_SATB1	-0.910442	2.54855	-4.24697	9.52235e-05	0.00993996	1.11835
ENSG00000100376	FAM118A	55007	NA	ENSG00000100376_FAM118A	0.516526	4.60349	4.23692	9.83974e-05	0.0102098	0.928895
ENSG00000144369	FAM171B	165215	Q6P995	ENSG00000144369_FAM171B	-1.19776	2.87783	-4.23119	0.000100255	0.0103405	1.21245
ENSG00000136147	PHF11	51131	NA	ENSG00000136147_PHF11	-0.287109	4.66484	-4.22407	0.000102608	0.0105026	0.848413
ENSG00000176920	FUT2	2524	E7EW73	ENSG00000176920_FUT2	-1.20882	1.98767	-4.22278	0.000103038	0.0105026	0.957448
ENSG00000166398	KIAA0355	9710	O15063	ENSG00000166398_KIAA0355	-0.256585	4.70754	-4.2187	0.000104418	0.0105423	0.877868
ENSG00000197183	NOL4L	140688	Q96MY1	ENSG00000197183_NOL4L	-0.826276	3.99596	-4.21804	0.000104644	0.0105423	0.90889
ENSG00000101017	CD40	958	P25942	ENSG00000101017_CD40	1.56809	1.00542	4.21253	0.000106537	0.010671	1.19725
ENSG00000125449	ARMC7	79637	Q9H6L4	ENSG00000125449_ARMC7	0.329568	3.62573	4.20771	0.000108223	0.0107775	0.978509
ENSG00000158050	DUSP2	1844	Q05923	ENSG00000158050_DUSP2	0.915853	2.24657	4.19611	0.00011238	0.0111276	1.05465
ENSG00000196850	PPTC7	160760	Q8NI37	ENSG00000196850_PPTC7	0.351195	6.58938	4.19001	0.000114632	0.0112223	0.586488
ENSG00000136514	RTP4	64108	Q96DX8	ENSG00000136514_RTP4	-1.19279	0.660681	-4.19154	0.000114061	0.0112223	1.13292
ENSG00000173894	CBX2	84733	Q14781	ENSG00000173894_CBX2	0.605247	3.77326	4.18524	0.000116422	0.011241	0.877551
ENSG00000100664	EIF5	1983	NA	ENSG00000100664_EIF5	0.266765	8.57331	4.18678	0.000115839	0.011241	0.520048
ENSG00000164418	GRIK2	2898	Q13002	ENSG00000164418_GRIK2	-1.55185	-0.930188	-4.18432	0.000116769	0.011241	1.10391
ENSG00000090776	EFNB1	1947	P98172	ENSG00000090776_EFNB1	0.555733	7.0595	4.17787	0.000119237	0.0114152	0.583544
ENSG00000096060	FKBP5	2289	Q13451	ENSG00000096060_FKBP5	0.540803	8.54632	4.16202	0.000125528	0.0118446	0.444487
ENSG00000072422	RHOBTB1	9886	O94844	ENSG00000072422_RHOBTB1	-0.844578	2.86878	-4.16354	0.00012491	0.0118446	0.966024
ENSG00000181143	MUC16	94025	Q8WXI7	ENSG00000181143_MUC16	-1.61591	1.83925	-4.16141	0.000125773	0.0118446	0.699754
ENSG00000163378	EOGT	285203	Q5NDL2	ENSG00000163378_EOGT	0.3389	6.38708	4.15509	0.000128374	0.0120241	0.498542
ENSG00000159110	IFNAR2	3455	P48551	ENSG00000159110_IFNAR2	-0.337138	4.98948	-4.15265	0.000129395	0.0120546	0.615118
ENSG00000227695	DNMBP-AS1	NA	NA	ENSG00000227695_DNMBP-AS1	-1.71261	-2.4794	-4.1357	0.000136684	0.0126655	0.702124
ENSG00000181222	POLR2A	5430	A0A087WWE2	ENSG00000181222_POLR2A	0.248476	8.70994	4.12862	0.000139845	0.0128213	0.337234
ENSG00000064309	CDON	50937	Q4KMG0	ENSG00000064309_CDON	-0.690558	2.09695	-4.1298	0.000139314	0.0128213	0.927379
ENSG00000163154	TNFAIP8L2	79626	Q6P589	ENSG00000163154_TNFAIP8L2	-2.38789	-4.34131	-4.11735	0.000145027	0.0132197	0.354284
ENSG00000102837	OLFM4	10562	Q6UX06	ENSG00000102837_OLFM4	-2.39567	2.20004	-4.11588	0.000145716	0.0132197	0.536219
ENSG00000175920	DOK7	285489	NA	ENSG00000175920_DOK7	0.975	2.83469	4.1074	0.000149754	0.0134255	0.763827
ENSG00000146021	KLHL3	26249	Q9UH77	ENSG00000146021_KLHL3	0.580676	2.65675	4.1048	0.000151018	0.0134255	0.822979
ENSG00000074219	TEAD2	8463	Q15562	ENSG00000074219_TEAD2	-0.336977	5.80248	-4.10657	0.000150158	0.0134255	0.39296
ENSG00000125826	RBCK1	10616	Q5JWR1	ENSG00000125826_RBCK1	-0.385801	6.64052	-4.10466	0.000151083	0.0134255	0.321491
ENSG00000134762	DSC3	1825	Q14574	ENSG00000134762_DSC3	0.519412	8.58137	4.10042	0.000153161	0.0135407	0.255413
ENSG00000095066	HOOK2	29911	Q96ED9	ENSG00000095066_HOOK2	-0.346327	5.32602	-4.08991	0.000158431	0.0139355	0.354132
ENSG00000154134	ROBO3	64221	Q96MS0	ENSG00000154134_ROBO3	0.710116	4.98796	4.08563	0.000160626	0.0139665	0.397303
ENSG00000115840	SLC25A12	8604	O75746	ENSG00000115840_SLC25A12	0.251615	5.17757	4.08452	0.000161202	0.0139665	0.406108
ENSG00000141569	TRIM65	201292	K7EJ59	ENSG00000141569_TRIM65	-0.346181	5.17777	-4.0863	0.000160284	0.0139665	0.378861
ENSG00000138669	PRKG2	5593	Q13237	ENSG00000138669_PRKG2	1.75224	3.77253	4.07444	0.000166511	0.0143547	0.629116
ENSG00000240563	L1TD1	54596	Q5T7N2	ENSG00000240563_L1TD1	1.55279	3.46542	4.06239	0.000173077	0.014847	0.619275
ENSG00000083307	GRHL2	79977	Q6ISB3	ENSG00000083307_GRHL2	-0.305188	6.15681	-4.06013	0.000174338	0.0148814	0.209745
ENSG00000269486	CTC-360G5.9	NA	NA	ENSG00000269486_CTC-360G5.9	1.64784	-2.40693	4.04573	0.00018257	0.0155077	0.369128
ENSG00000174130	TLR6	10333	Q9Y2C9	ENSG00000174130_TLR6	-0.652656	3.92354	-4.0436	0.000183824	0.0155381	0.329004
ENSG00000214290	COLCA2	120376	A0A0A0MTE5	ENSG00000214290_COLCA2	2.05378	-3.82476	4.03548	0.000188663	0.015793	0.25241
ENSG00000134247	PTGFRN	5738	Q9P2B2	ENSG00000134247_PTGFRN	-0.324218	8.90459	-4.03614	0.000188264	0.015793	0.0521667
ENSG00000185973	TMLHE	55217	Q9NVH6	ENSG00000185973_TMLHE	-0.368114	3.6435	-4.02752	0.000193528	0.0161224	0.450843
ENSG00000103460	TOX3	27324	O15405	ENSG00000103460_TOX3	-1.95491	-3.87424	-4.02506	0.000195054	0.0161718	0.277505
ENSG00000198483	ANKRD35	148741	Q8N283	ENSG00000198483_ANKRD35	0.836032	2.36157	4.01098	0.000204026	0.0167947	0.520823
ENSG00000003436	TFPI	7035	P10646	ENSG00000003436_TFPI	-1.56588	0.0677742	-4.01025	0.000204507	0.0167947	0.611857
ENSG00000143149	ALDH9A1	223	P49189	ENSG00000143149_ALDH9A1	0.241091	6.84651	4.00816	0.000205869	0.0168269	0.0137594
ENSG00000197536	C5orf56	NA	Q8N8D9	ENSG00000197536_C5orf56	-0.806465	0.381956	-4.0003	0.000211098	0.017093	0.580053
ENSG00000167552	TUBA1A	7846	Q71U36	ENSG00000167552_TUBA1A	-0.997362	6.98043	-4.00103	0.000210608	0.017093	0.00289431
ENSG00000092010	PSME1	5720	Q06323	ENSG00000092010_PSME1	-0.339344	6.5703	-3.99872	0.000212163	0.0170993	-0.011922
ENSG00000156463	SH3RF2	153769	Q8TEC5	ENSG00000156463_SH3RF2	0.620004	5.89303	3.99443	0.000215085	0.0172546	0.0675853
ENSG00000139625	MAP3K12	7786	Q12852	ENSG00000139625_MAP3K12	-0.820472	2.2987	-3.98988	0.000218222	0.0174255	0.537185
ENSG00000013297	CLDN11	101928583	O75508	ENSG00000013297_CLDN11	1.74402	4.87073	3.97535	0.000228549	0.0181306	0.172849
ENSG00000104960	PTOV1	53635	M0QYH7	ENSG00000104960_PTOV1	-0.253011	5.9787	-3.97454	0.000229144	0.0181306	-0.0464754
ENSG00000165152	TMEM246	84302	Q9BRR3	ENSG00000165152_TMEM246	1.07679	3.14588	3.97245	0.000230672	0.0181685	0.479283
ENSG00000065320	NTN1	9423	O95631	ENSG00000065320_NTN1	-1.59722	1.24387	-3.97036	0.000232208	0.0182068	0.501561
ENSG00000179364	PACS2	23241	Q86VP3	ENSG00000179364_PACS2	-0.246509	5.84354	-3.96224	0.000238274	0.0185982	-0.080486
ENSG00000234127	TRIM26	7726	NA	ENSG00000234127_TRIM26	0.256701	6.34459	3.95906	0.00024069	0.0187026	-0.108437
ENSG00000146090	RASGEF1C	255426	Q8N431	ENSG00000146090_RASGEF1C	-1.58217	-4.09351	-3.95504	0.000243779	0.018858	0.00619908
ENSG00000188313	PLSCR1	5359	O15162	ENSG00000188313_PLSCR1	-0.352609	6.43183	-3.9508	0.000247082	0.0190286	-0.1659
ENSG00000120149	MSX2	4488	P35548	ENSG00000120149_MSX2	0.741094	1.54239	3.94861	0.000248803	0.0190764	0.431084
ENSG00000089195	TRMT6	51605	NA	ENSG00000089195_TRMT6	0.413538	5.78682	3.94399	0.000252479	0.0192729	-0.0853369
ENSG00000008300	CELSR3	100616112	Q9NYQ7	ENSG00000008300_CELSR3	-0.671689	1.58647	-3.94248	0.000253689	0.0192804	0.38671
ENSG00000158258	CLSTN2	64084	Q9H4D0	ENSG00000158258_CLSTN2	-2.00378	-0.458595	-3.94098	0.000254898	0.0192877	0.333262
ENSG00000166828	SCNN1G	6340	P51170	ENSG00000166828_SCNN1G	1.13086	2.86705	3.93485	0.000259894	0.0195802	0.0274977
ENSG00000140961	OSGIN1	29948	H3BT09	ENSG00000140961_OSGIN1	0.710395	2.0794	3.92523	0.000267928	0.0200384	0.303896
ENSG00000101773	RBBP8	100616139	A0A140TA82	ENSG00000101773_RBBP8	0.600981	7.86265	3.9235	0.0002694	0.0200384	-0.265771
ENSG00000125354	2020-09-06	23157	Q14141	ENSG00000125354_SEPT6	-0.500708	4.57051	-3.92344	0.000269445	0.0200384	-0.0564329
ENSG00000174840	PDE12	201626	F6T1Q0	ENSG00000174840_PDE12	0.291836	6.1434	3.92093	0.00027159	0.0201116	-0.220494
ENSG00000151136	BTBD11	121551	A6QL63	ENSG00000151136_BTBD11	0.610746	5.22342	3.91837	0.000273797	0.0201565	-0.059466
ENSG00000172500	FIBP	9158	NA	ENSG00000172500_FIBP	-0.217048	5.71253	-3.9162	0.000275686	0.0201565	-0.180963
ENSG00000124766	SOX4	6659	Q06945	ENSG00000124766_SOX4	-0.511107	7.32716	-3.9169	0.000275077	0.0201565	-0.288339
ENSG00000149582	TMEM25	84866	Q86YD3	ENSG00000149582_TMEM25	-0.365524	4.88469	-3.90389	0.000286608	0.0206931	-0.0970884
ENSG00000166173	LARP6	55323	Q9BRS8	ENSG00000166173_LARP6	-0.578805	4.37168	-3.90394	0.000286568	0.0206931	0.0431633
ENSG00000203805	PLPP4	196051	A0A0A0MSZ0	ENSG00000203805_PLPP4	-1.71008	-1.30659	-3.90484	0.000285755	0.0206931	0.305885
ENSG00000077092	RARB	5915	D6RBI3	ENSG00000077092_RARB	-2.19756	2.01031	-3.90192	0.000288399	0.020736	0.307554
ENSG00000146083	RNF44	22838	Q7L0R7	ENSG00000146083_RNF44	-0.460676	5.2499	-3.88912	0.000300277	0.0215008	-0.243156
ENSG00000155846	PPARGC1B	133522	Q86YN6	ENSG00000155846_PPARGC1B	0.598509	4.39536	3.88767	0.000301649	0.0215102	-0.0399925
ENSG00000184792	OSBP2	23762	Q969R2	ENSG00000184792_OSBP2	0.999586	6.20068	3.8782	0.000310774	0.0218906	-0.303444
ENSG00000140391	TSPAN3	10099	O60637	ENSG00000140391_TSPAN3	0.207837	7.11661	3.88063	0.000308413	0.0218906	-0.390121
ENSG00000205464	ATP6AP1L	92270	Q52LC2	ENSG00000205464_ATP6AP1L	-0.855828	1.18537	-3.87844	0.000310538	0.0218906	0.230712
ENSG00000132003	ZSWIM4	65249	Q9H7M6	ENSG00000132003_ZSWIM4	-0.48187	4.23799	-3.87674	0.000312204	0.0219023	-0.221783
ENSG00000234745	HLA-B	3106	NA	ENSG00000234745_HLA-B	-0.897039	6.99242	-3.87415	0.000314764	0.0219929	-0.405988
ENSG00000008086	CDKL5	6792	O76039	ENSG00000008086_CDKL5	-0.706333	1.95764	-3.87074	0.000318157	0.0221407	0.170272
ENSG00000146386	ABRACL	58527	Q9P1F3	ENSG00000146386_ABRACL	-0.258878	6.3775	-3.86705	0.000321866	0.0223092	-0.401889
ENSG00000116688	MFN2	9927	NA	ENSG00000116688_MFN2	0.214038	8.22344	3.85734	0.000331833	0.0225641	-0.477846
ENSG00000196456	ZNF775	285971	C9JVG2	ENSG00000196456_ZNF775	-0.67801	1.74707	-3.85724	0.000331934	0.0225641	0.165994
ENSG00000133401	PDZD2	23037	O15018	ENSG00000133401_PDZD2	-1.27418	4.10956	-3.85853	0.000330591	0.0225641	-0.243636
ENSG00000272620	AFAP1-AS1	84740	NA	ENSG00000272620_AFAP1-AS1	-1.38143	-0.665786	-3.85713	0.000332055	0.0225641	0.155761
ENSG00000174792	C4orf26	152816	NA	ENSG00000174792_C4orf26	-2.01625	-1.88004	-3.85869	0.000330425	0.0225641	0.158479
ENSG00000167549	CORO6	84940	NA	ENSG00000167549_CORO6	-0.909205	2.16742	-3.85508	0.000334196	0.0226209	0.133118
ENSG00000091513	TF	7018	P02787	ENSG00000091513_TF	-2.31098	0.394419	-3.84623	0.000343602	0.0231671	0.143222
ENSG00000204682	CASC10	399726	Q5T4H9	ENSG00000204682_CASC10	-0.537667	2.62881	-3.8419	0.000348302	0.0233929	-0.00657308
ENSG00000175221	MED16	10025	Q9Y2X0	ENSG00000175221_MED16	0.256699	5.563	3.83631	0.000354447	0.0237137	-0.41537
ENSG00000116001	TIA1	7072	P31483	ENSG00000116001_TIA1	-0.311975	6.10837	-3.8339	0.000357139	0.0238019	-0.480044
ENSG00000103089	FA2H	79152	NA	ENSG00000103089_FA2H	0.91355	-0.034605	3.82698	0.00036495	0.0241369	0.0571681
ENSG00000006118	TMEM132A	54972	NA	ENSG00000006118_TMEM132A	-0.671933	6.23967	-3.82733	0.000364551	0.0241369	-0.509459
ENSG00000143867	OSR1	130497	Q8TAX0	ENSG00000143867_OSR1	0.971942	5.42103	3.82309	0.000369421	0.0241963	-0.370424
ENSG00000214655	ZSWIM8	23053	S4R410	ENSG00000214655_ZSWIM8	-0.295602	6.66491	-3.82256	0.000370037	0.0241963	-0.55374
ENSG00000004139	SARM1	23098	NA	ENSG00000004139_SARM1	-1.25851	0.959958	-3.8243	0.00036802	0.0241963	0.0934203
ENSG00000134207	SYT6	148281	V9GYB1	ENSG00000134207_SYT6	-1.63852	-4.77769	-3.8165	0.000377109	0.024566	-0.401949
ENSG00000082438	COBLL1	22837	NA	ENSG00000082438_COBLL1	0.407384	5.619	3.81526	0.000378573	0.024569	-0.403687
ENSG00000183850	ZNF730	100129543	M0QYI4	ENSG00000183850_ZNF730	1.24113	-0.109013	3.81163	0.000382888	0.024707	0.0419811
ENSG00000147649	MTDH	92140	Q86UE4	ENSG00000147649_MTDH	0.253679	8.31229	3.81108	0.000383551	0.024707	-0.621665
ENSG00000026103	FAS	355	A0A087WTM9	ENSG00000026103_FAS	0.43092	5.24554	3.80876	0.000386336	0.0247942	-0.413276
ENSG00000134531	EMP1	2012	P54849	ENSG00000134531_EMP1	-0.545862	9.39069	-3.80499	0.000390907	0.02483	-0.652039
ENSG00000261971	MMP25-AS1	NA	NA	ENSG00000261971_MMP25-AS1	-0.701246	1.57671	-3.80476	0.000391193	0.02483	-0.066021
ENSG00000242265	PEG10	23089	Q86TG7	ENSG00000242265_PEG10	-0.832539	7.8703	-3.80588	0.000389828	0.02483	-0.597743
ENSG00000173166	RAPH1	65059	C9J164	ENSG00000173166_RAPH1	0.495728	7.31666	3.79814	0.000399345	0.0252549	-0.642522
ENSG00000147454	SLC25A37	51312	Q9NYZ2	ENSG00000147454_SLC25A37	-0.371319	6.87491	-3.79441	0.000404021	0.0253671	-0.648115
ENSG00000110719	TCIRG1	10312	Q13488	ENSG00000110719_TCIRG1	-0.419784	5.32434	-3.79439	0.000404046	0.0253671	-0.580325
ENSG00000155380	SLC16A1	6566	P53985	ENSG00000155380_SLC16A1	0.392925	8.35828	3.78897	0.00041093	0.0255218	-0.682481
ENSG00000116285	ERRFI1	54206	K7ENI4	ENSG00000116285_ERRFI1	-0.522854	8.61834	-3.7894	0.000410378	0.0255218	-0.695074
ENSG00000177738	CTD-2201E18.3	648987	NA	ENSG00000177738_CTD-2201E18.3	-0.832083	-0.527854	-3.78982	0.000409838	0.0255218	-0.0463306
ENSG00000227066	RP3-340N1.2	NA	NA	ENSG00000227066_RP3-340N1.2	-1.28853	-2.72401	-3.78536	0.000415563	0.0257174	-0.0740843
ENSG00000174943	KCTD13	253980	Q8WZ19	ENSG00000174943_KCTD13	-0.342189	3.54225	-3.78285	0.000418832	0.0257728	-0.336659
ENSG00000224794	RP3-333H23.8	NA	NA	ENSG00000224794_RP3-333H23.8	-1.30811	-4.64752	-3.78239	0.000419433	0.0257728	-0.453671
ENSG00000178395	CCDC185	164127	Q8N715	ENSG00000178395_CCDC185	1.4796	-4.14741	3.77953	0.00042318	0.0259112	-0.341561
ENSG00000255026	RP11-326C3.2	NA	NA	ENSG00000255026_RP11-326C3.2	-1.50565	-2.36599	-3.77536	0.000428697	0.0260648	-0.0678712
ENSG00000134873	CLDN10	9071	P78369	ENSG00000134873_CLDN10	-2.33942	-0.116631	-3.77557	0.000428422	0.0260648	-0.0401242
ENSG00000118515	SGK1	6446	O00141	ENSG00000118515_SGK1	0.569657	7.92317	3.76828	0.000438242	0.0263983	-0.742771
ENSG00000171843	MLLT3	4300	P42568	ENSG00000171843_MLLT3	-0.63367	3.78822	-3.7679	0.000438752	0.0263983	-0.409402
ENSG00000231632	NA	NA	NA	ENSG00000231632_NA	-1.34526	-3.53524	-3.76806	0.000438538	0.0263983	-0.269591
ENSG00000267383	CTC-260E6.6	NA	NA	ENSG00000267383_CTC-260E6.6	1.07362	-0.732417	3.76306	0.000445401	0.0265176	-0.119273
ENSG00000117226	GBP3	2635	Q9H0R5	ENSG00000117226_GBP3	-1.02929	5.55086	-3.76474	0.000443078	0.0265176	-0.660243
ENSG00000177614	PGBD5	79605	A0A0A0MS21	ENSG00000177614_PGBD5	-1.60244	-1.02236	-3.7631	0.00044535	0.0265176	-0.0775093
ENSG00000173698	ADGRG2	10149	Q8IZP9	ENSG00000173698_ADGRG2	-2.79284	-2.61899	-3.76201	0.000446857	0.0265176	-0.326129
ENSG00000091831	ESR1	2099	NA	ENSG00000091831_ESR1	-1.91642	0.517603	-3.76005	0.000449585	0.0265884	-0.0810403
ENSG00000266256	LINC00683	400660	NA	ENSG00000266256_LINC00683	0.741934	-0.122255	3.75325	0.000459171	0.0270352	-0.114351
ENSG00000164292	RHOBTB3	22836	NA	ENSG00000164292_RHOBTB3	-0.958847	3.66054	-3.75248	0.000460261	0.0270352	-0.313735
ENSG00000156127	BATF	10538	Q16520	ENSG00000156127_BATF	-1.50721	-2.90595	-3.7507	0.000462813	0.0270933	-0.183648
ENSG00000128284	APOL3	80833	O95236	ENSG00000128284_APOL3	-0.9039	2.44676	-3.74929	0.000464836	0.0271201	-0.296575
ENSG00000237515	SHISA9	729993	B4DS77	ENSG00000237515_SHISA9	1.19082	1.91311	3.74172	0.000475872	0.0276097	-0.498289
ENSG00000270107	NA	NA	NA	ENSG00000270107_NA	1.10745	-2.04776	3.74135	0.000476414	0.0276097	-0.132951
ENSG00000197635	DPP4	1803	P27487	ENSG00000197635_DPP4	1.12264	3.20995	3.73761	0.00048197	0.0277869	-0.377954
ENSG00000140945	CDH13	1012	P55290	ENSG00000140945_CDH13	0.920694	5.97702	3.73606	0.000484283	0.0277869	-0.602437
ENSG00000151715	TMEM45B	120224	Q96B21	ENSG00000151715_TMEM45B	0.812102	3.81679	3.73708	0.000482759	0.0277869	-0.642148
ENSG00000025708	TYMP	1890	P19971	ENSG00000025708_TYMP	-0.742292	4.63	-3.73437	0.000486829	0.0278408	-0.660791
ENSG00000206337	HCP5	10866	NA	ENSG00000206337_HCP5	-0.714598	3.40646	-3.72256	0.000504927	0.0286865	-0.552983
ENSG00000258545	RHOXF1-AS1	101928969	NA	ENSG00000258545_RHOXF1-AS1	-2.60058	-2.49162	-3.72261	0.000504846	0.0286865	-0.302183
ENSG00000137261	KIAA0319	9856	Q5VV43	ENSG00000137261_KIAA0319	1.37285	-1.90568	3.70993	0.000525004	0.028698	-0.221735
ENSG00000133687	TMTC1	83857	Q8IUR5	ENSG00000133687_TMTC1	1.26123	6.70248	3.71512	0.000516662	0.028698	-0.702831
ENSG00000092295	TGM1	7051	P22735	ENSG00000092295_TGM1	1.21456	4.52058	3.71003	0.000524842	0.028698	-0.605928
ENSG00000128594	LRRC4	64101	Q9HBW1	ENSG00000128594_LRRC4	0.634126	2.39846	3.71769	0.00051258	0.028698	-0.393105
ENSG00000100077	GRK3	157	P35626	ENSG00000100077_GRK3	0.601056	4.85845	3.71074	0.000523691	0.028698	-0.602085
ENSG00000174437	ATP2A2	488	F8W1Z7	ENSG00000174437_ATP2A2	0.242491	9.59516	3.71238	0.000521057	0.028698	-0.926197
ENSG00000151883	PARP8	79668	NA	ENSG00000151883_PARP8	-0.326185	4.79062	-3.71312	0.000519865	0.028698	-0.684793
ENSG00000111752	PHC1	1911	F5H6F5	ENSG00000111752_PHC1	-0.453996	1.8007	-3.71878	0.000510854	0.028698	-0.242593
ENSG00000133247	KMT5C	84787	NA	ENSG00000133247_KMT5C	-0.469986	2.53927	-3.7112	0.00052295	0.028698	-0.390007
ENSG00000125347	IRF1	3659	P10914	ENSG00000125347_IRF1	-0.633543	4.64199	-3.71012	0.000524696	0.028698	-0.731344
ENSG00000100985	MMP9	4318	P14780	ENSG00000100985_MMP9	-2.18341	1.20907	-3.71969	0.000509425	0.028698	-0.279472
ENSG00000198795	ZNF521	25925	Q96K83	ENSG00000198795_ZNF521	-2.5432	-1.64702	-3.71845	0.00051138	0.028698	-0.37641
ENSG00000119650	IFT43	112752	NA	ENSG00000119650_IFT43	-0.290443	4.12082	-3.70612	0.000531209	0.0289459	-0.582229
ENSG00000104375	STK3	6788	NA	ENSG00000104375_STK3	-0.319652	5.42891	-3.70277	0.000536724	0.0291547	-0.815969
ENSG00000184012	TMPRSS2	7113	O15393	ENSG00000184012_TMPRSS2	-0.88182	1.73631	-3.70158	0.0005387	0.0291706	-0.707239
ENSG00000118322	ATP10B	23120	O94823	ENSG00000118322_ATP10B	2.22008	-0.0260535	3.69446	0.000550639	0.0294664	-0.338722
ENSG00000198807	PAX9	5083	NA	ENSG00000198807_PAX9	2.01985	-1.29714	3.69243	0.000554092	0.0294664	-0.386043
ENSG00000250742	RP11-834C11.4	400043	NA	ENSG00000250742_RP11-834C11.4	0.776393	3.02936	3.69314	0.000552877	0.0294664	-0.367478
ENSG00000036672	USP2	9099	O75604	ENSG00000036672_USP2	0.599841	1.88761	3.69725	0.000545932	0.0294664	-0.373038
ENSG00000250132	RP11-359B12.2	NA	NA	ENSG00000250132_RP11-359B12.2	0.546672	0.908812	3.69086	0.000556771	0.0294664	-0.276452
ENSG00000163565	IFI16	3428	H3BVE6	ENSG00000163565_IFI16	0.353247	7.23264	3.69583	0.000548318	0.0294664	-0.9033
ENSG00000198816	ZNF358	140467	M0R2S5	ENSG00000198816_ZNF358	-0.593413	3.48248	-3.69058	0.000557253	0.0294664	-0.518351
ENSG00000135124	P2RX4	5025	Q99571	ENSG00000135124_P2RX4	-0.684985	2.26135	-3.69028	0.000557766	0.0294664	-0.434084
ENSG00000169992	NLGN2	57555	Q8NFZ4	ENSG00000169992_NLGN2	-0.807828	4.26209	-3.68828	0.000561207	0.0295581	-0.641699
ENSG00000070961	ATP2B1	490	P20020	ENSG00000070961_ATP2B1	0.451964	7.31012	3.68076	0.000574335	0.0300667	-0.961326
ENSG00000080822	CLDND1	56650	D6R9K1	ENSG00000080822_CLDND1	-0.362988	5.96201	-3.68163	0.000572815	0.0300667	-0.900074
ENSG00000160307	S100B	6285	P04271	ENSG00000160307_S100B	-1.43629	0.674815	-3.67485	0.000584863	0.0305256	-0.395665
ENSG00000137941	TTLL7	79739	NA	ENSG00000137941_TTLL7	-0.639418	3.45048	-3.67235	0.000589368	0.0306684	-0.513009
ENSG00000144040	SFXN5	94097	NA	ENSG00000144040_SFXN5	0.494568	4.08265	3.67011	0.000593438	0.0307877	-0.660168
ENSG00000198848	CES1	1066	H3BQR4	ENSG00000198848_CES1	2.75335	-2.21235	3.6682	0.000596938	0.0308769	-0.513007
ENSG00000159167	STC1	6781	P52823	ENSG00000159167_STC1	0.922953	6.88264	3.66348	0.000605645	0.0311413	-1.02965
ENSG00000119866	BCL11A	53335	Q9H165	ENSG00000119866_BCL11A	-0.646309	2.6788	-3.66366	0.000605305	0.0311413	-0.44312
ENSG00000088448	ANKRD10	55608	Q9NXR5	ENSG00000088448_ANKRD10	-0.340186	5.21716	-3.66246	0.000607541	0.0311464	-0.94227
ENSG00000140263	SORD	6652	Q00796	ENSG00000140263_SORD	0.489767	5.04985	3.65982	0.000612474	0.0311841	-0.840534
ENSG00000174791	RIN1	9610	NA	ENSG00000174791_RIN1	0.437082	5.1433	3.65918	0.000613676	0.0311841	-0.806078
ENSG00000214140	PRCD	768206	NA	ENSG00000214140_PRCD	-1.82587	-2.33054	-3.66091	0.000610433	0.0311841	-0.460001
ENSG00000262714	RP11-44F14.8	NA	NA	ENSG00000262714_RP11-44F14.8	0.655849	0.793052	3.65478	0.000622	0.0315147	-0.375993
ENSG00000173210	ABLIM3	22885	O94929	ENSG00000173210_ABLIM3	0.669793	5.27133	3.65243	0.000626491	0.0316497	-0.932055
ENSG00000094963	FMO2	2327	Q99518	ENSG00000094963_FMO2	-2.26058	-2.15278	-3.65136	0.000628552	0.0316615	-0.477677
ENSG00000005243	COPZ2	51226	NA	ENSG00000005243_COPZ2	0.82765	2.56769	3.64778	0.000635487	0.031918	-0.438806
ENSG00000011105	TSPAN9	10867	E9PHL0	ENSG00000011105_TSPAN9	-0.488092	5.95001	-3.6463	0.000638358	0.0319695	-0.981531
ENSG00000082556	OPRK1	4986	P41145	ENSG00000082556_OPRK1	1.67641	-4.10956	3.64518	0.000640565	0.0319876	-0.606246
ENSG00000154153	FAM134B	54463	H0Y9U4	ENSG00000154153_FAM134B	0.576147	3.52575	3.64007	0.000650642	0.0320293	-0.672757
ENSG00000125089	SH3TC1	54436	NA	ENSG00000125089_SH3TC1	0.56817	4.61999	3.64308	0.000644688	0.0320293	-0.644827
ENSG00000203879	GDI1	2664	P31150	ENSG00000203879_GDI1	-0.263899	6.71816	-3.64051	0.000649766	0.0320293	-1.065
ENSG00000163795	ZNF513	130557	Q8N8E2	ENSG00000163795_ZNF513	-0.309415	3.95837	-3.64168	0.000647459	0.0320293	-0.764904
ENSG00000130775	THEMIS2	9473	Q5TEJ8	ENSG00000130775_THEMIS2	-0.883964	2.51743	-3.64092	0.000648954	0.0320293	-0.584555
ENSG00000068654	POLR1A	25885	O95602	ENSG00000068654_POLR1A	0.253036	7.38952	3.63604	0.000658716	0.0323349	-1.11473
ENSG00000235098	ANKRD65	441869	E5RJM6	ENSG00000235098_ANKRD65	0.770951	2.28033	3.63171	0.000667491	0.0323985	-0.475222
ENSG00000065613	SLK	9748	Q9H2G2	ENSG00000065613_SLK	0.271121	8.15522	3.63324	0.000664376	0.0323985	-1.13998
ENSG00000139266	2020-03-09	92979	Q86YJ5	ENSG00000139266_MARCH9	-0.461998	3.81466	-3.63221	0.000666472	0.0323985	-0.777379
ENSG00000206503	HLA-A	3105	P16188	ENSG00000206503_HLA-A	-0.630187	7.81581	-3.63374	0.00066337	0.0323985	-1.136
ENSG00000254827	SLC22A18AS	5003	Q8N1D0	ENSG00000254827_SLC22A18AS	1.0895	0.529335	3.62948	0.00067205	0.0325287	-0.444053
ENSG00000146147	MLIP	90523	D6R9R6	ENSG00000146147_MLIP	-1.60468	-3.4292	-3.62829	0.000674489	0.0325558	-0.608009
ENSG00000103044	HAS3	3038	O00219	ENSG00000103044_HAS3	0.951747	6.9648	3.62512	0.000681045	0.0327097	-1.01538
ENSG00000111801	BTN3A3	10384	C9J3Q8	ENSG00000111801_BTN3A3	-0.560378	3.36014	-3.62493	0.000681453	0.0327097	-0.705267
ENSG00000183579	ZNRF3	84133	Q9ULT6	ENSG00000183579_ZNRF3	0.41922	4.32515	3.62014	0.000691486	0.0330996	-0.812867
ENSG00000237149	ZNF503-AS2	100131213	NA	ENSG00000237149_ZNF503-AS2	1.13954	0.12725	3.61863	0.000694677	0.0331246	-0.484014
ENSG00000112855	HARS2	23438	P49590	ENSG00000112855_HARS2	-0.166233	5.49641	-3.61808	0.000695831	0.0331246	-1.04602
ENSG00000136925	TSTD2	158427	NA	ENSG00000136925_TSTD2	-0.200432	4.77453	-3.6164	0.000699417	0.0332041	-0.967984
ENSG00000175906	ARL4D	379	P49703	ENSG00000175906_ARL4D	0.567733	4.57895	3.61045	0.000712216	0.0336831	-0.826969
ENSG00000121380	BCL2L14	79370	Q9BZR8	ENSG00000121380_BCL2L14	-1.55933	-2.63175	-3.6099	0.000713395	0.0336831	-0.537856
ENSG00000227885	RP11-79N23.1	NA	NA	ENSG00000227885_RP11-79N23.1	-1.20288	-1.45106	-3.60753	0.000718574	0.0338355	-0.572937
ENSG00000113108	APBB3	102465499	NA	ENSG00000113108_APBB3	-0.594592	2.54911	-3.60266	0.0007293	0.0342153	-0.718759
ENSG00000117983	MUC5B	727897	NA	ENSG00000117983_MUC5B	-1.01336	1.43519	-3.60031	0.00073454	0.0342153	-1.00863
ENSG00000204044	RP11-465L10.10	NA	NA	ENSG00000204044_RP11-465L10.10	-1.54981	-4.31354	-3.60052	0.000734062	0.0342153	-0.827842
ENSG00000164129	NPY5R	4889	Q15761	ENSG00000164129_NPY5R	-1.93504	-3.63144	-3.60199	0.00073078	0.0342153	-0.702754
ENSG00000101751	POLI	11201	Q9UNA4	ENSG00000101751_POLI	-0.369855	4.24262	-3.59924	0.000736935	0.0342349	-0.923405
ENSG00000160321	ZNF208	7757	M0QXL7	ENSG00000160321_ZNF208	2.17082	-1.76039	3.59724	0.000741424	0.0343513	-0.59795
ENSG00000143156	NME7	29922	NA	ENSG00000143156_NME7	-0.422839	4.34075	-3.59102	0.000755582	0.0349139	-0.898381
ENSG00000113269	RNF130	55819	E5RI87	ENSG00000113269_RNF130	-0.3668	4.75548	-3.58901	0.00076021	0.0350344	-1.03886
ENSG00000073464	CLCN4	1183	P51793	ENSG00000073464_CLCN4	0.83325	2.15223	3.58401	0.000771828	0.0354754	-0.661162
ENSG00000111319	SCNN1A	6337	P37088	ENSG00000111319_SCNN1A	0.460759	8.23745	3.58069	0.000779641	0.0356856	-1.29788
ENSG00000151612	ZNF827	152485	Q17R98	ENSG00000151612_ZNF827	-0.332936	5.48613	-3.58032	0.00078052	0.0356856	-1.15114
ENSG00000176371	ZSCAN2	54993	F5H4P1	ENSG00000176371_ZSCAN2	-0.452659	2.43173	-3.57673	0.000789075	0.0359798	-0.706668
ENSG00000255142	AP006621.6	NA	NA	ENSG00000255142_AP006621.6	-1.39633	-2.05178	-3.57588	0.000791106	0.0359798	-0.659981
ENSG00000136010	ALDH1L2	160428	NA	ENSG00000136010_ALDH1L2	0.774604	5.76122	3.57411	0.000795355	0.0360783	-1.1248
ENSG00000230107	CTA-126B4.7	NA	NA	ENSG00000230107_CTA-126B4.7	-1.46717	-3.9998	-3.57313	0.000797722	0.0360912	-0.818241
ENSG00000164124	TMEM144	55314	D6RDN8	ENSG00000164124_TMEM144	0.274731	3.70487	3.56991	0.000805552	0.0363506	-0.95436
ENSG00000047597	XK	7504	P51811	ENSG00000047597_XK	0.602351	1.25	3.56766	0.000811057	0.0364093	-0.654283
ENSG00000157542	KCNJ6	3763	P48051	ENSG00000157542_KCNJ6	-2.61206	-2.98128	-3.56827	0.000809566	0.0364093	-0.713843
ENSG00000117013	KCNQ4	9132	P56696	ENSG00000117013_KCNQ4	-0.904688	-0.965745	-3.56123	0.000827018	0.0370299	-0.622201
ENSG00000161714	PLCD3	113026	Q8N3E9	ENSG00000161714_PLCD3	0.399483	6.13083	3.55898	0.000832654	0.0371862	-1.22088
ENSG00000172845	SP3	6670	Q02447	ENSG00000172845_SP3	0.211339	6.73352	3.55782	0.000835584	0.0372015	-1.31174
ENSG00000038532	CLEC16A	23274	Q2KHT3	ENSG00000038532_CLEC16A	0.204893	6.1598	3.55715	0.000837291	0.0372015	-1.28313
ENSG00000219545	UMAD1	729852	NA	ENSG00000219545_UMAD1	0.289746	3.60953	3.55628	0.000839483	0.0372035	-0.939931
ENSG00000176387	HSD11B2	3291	NA	ENSG00000176387_HSD11B2	0.606087	1.80312	3.55281	0.000848347	0.03731	-0.836061
ENSG00000136709	WDR33	55339	Q9C0J8	ENSG00000136709_WDR33	0.180082	6.60114	3.55319	0.000847368	0.03731	-1.32184
ENSG00000143178	TBX19	9095	O60806	ENSG00000143178_TBX19	-0.665707	0.376164	-3.55311	0.000847564	0.03731	-0.644908
ENSG00000177830	CHID1	66005	H0YDL6	ENSG00000177830_CHID1	0.218225	5.99499	3.55024	0.000854963	0.0375058	-1.29219
ENSG00000198092	TMPRSS11F	389208	Q6ZWK6	ENSG00000198092_TMPRSS11F	1.78248	-3.84662	3.5463	0.000865183	0.0375733	-0.839407
ENSG00000125775	SDCBP2	27111	Q9H190	ENSG00000125775_SDCBP2	0.799852	3.76983	3.54742	0.000862275	0.0375733	-1.07652
ENSG00000081913	PHLPP1	23239	O60346	ENSG00000081913_PHLPP1	0.208264	5.62822	3.54701	0.00086333	0.0375733	-1.26258
ENSG00000259354	RP11-519G16.3	NA	NA	ENSG00000259354_RP11-519G16.3	-1.19097	-3.43789	-3.5464	0.000864932	0.0375733	-0.766094
ENSG00000157613	CREB3L1	90993	Q96BA8	ENSG00000157613_CREB3L1	-2.42816	-3.35873	-3.54548	0.000867344	0.0375733	-0.803342
ENSG00000108312	UBTF	7343	P17480	ENSG00000108312_UBTF	0.243218	7.01347	3.54363	0.000872194	0.0376892	-1.36155
ENSG00000163249	CCNYL1	100616361	Q8N7R7	ENSG00000163249_CCNYL1	0.381811	6.76267	3.53818	0.000886669	0.0381246	-1.36546
ENSG00000113758	DBN1	1627	Q16643	ENSG00000113758_DBN1	-0.475312	6.85803	-3.53895	0.000884599	0.0381246	-1.36998
ENSG00000122133	PAEP	5047	F2Z349	ENSG00000122133_PAEP	-1.81066	-4.51373	-3.53688	0.000890146	0.0381793	-0.986885
ENSG00000272189	RP3-325F22.5	NA	NA	ENSG00000272189_RP3-325F22.5	0.598313	1.93784	3.53141	0.000904953	0.0386232	-0.759874
ENSG00000105849	TWISTNB	221830	Q3B726	ENSG00000105849_TWISTNB	0.263571	5.63574	3.53152	0.000904634	0.0386232	-1.30238
ENSG00000111913	FAM65B	9750	Q9Y4F9	ENSG00000111913_FAM65B	1.96469	-2.44566	3.52899	0.000911562	0.0388097	-0.827186
ENSG00000141750	STAC2	342667	Q6ZMT1	ENSG00000141750_STAC2	1.28131	-0.22328	3.52638	0.000918776	0.0390209	-0.849294
ENSG00000180801	ARSJ	79642	Q5FYB0	ENSG00000180801_ARSJ	0.421779	5.96867	3.52457	0.000923781	0.0391376	-1.32759
ENSG00000105835	NAMPT	10135	P43490	ENSG00000105835_NAMPT	0.341772	6.34677	3.52118	0.000933254	0.0393466	-1.41623
ENSG00000173402	DAG1	1605	NA	ENSG00000173402_DAG1	0.242208	8.57999	3.52167	0.000931893	0.0393466	-1.4725
ENSG00000147874	HAUS6	54801	Q7Z4H7	ENSG00000147874_HAUS6	0.295205	5.2959	3.51685	0.000945501	0.0396698	-1.32027
ENSG00000250320	CTD-2269F5.1	NA	NA	ENSG00000250320_CTD-2269F5.1	-1.63776	-2.66515	-3.51754	0.000943543	0.0396698	-0.918639
ENSG00000166473	PKD1L2	114780	NA	ENSG00000166473_PKD1L2	-1.06883	-0.436618	-3.51427	0.000952862	0.0398821	-0.78095
ENSG00000180340	FZD2	2535	Q14332	ENSG00000180340_FZD2	-0.978612	1.38636	-3.51244	0.000958134	0.0400061	-0.746753
ENSG00000100767	PAPLN	89932	O95428	ENSG00000100767_PAPLN	-1.03024	1.85139	-3.49799	0.00100062	0.0416796	-0.840704
ENSG00000186453	FAM228A	653140	F2Z3J0	ENSG00000186453_FAM228A	-2.02742	-4.31204	-3.49481	0.00101023	0.0419789	-1.06925
ENSG00000169715	MT1E	4493	P04732	ENSG00000169715_MT1E	0.820891	6.90809	3.49014	0.00102445	0.0422723	-1.46774
ENSG00000139636	LMBR1L	55716	Q6UX01	ENSG00000139636_LMBR1L	-0.461135	3.81584	-3.49009	0.00102461	0.0422723	-1.22809
ENSG00000161653	NAGS	162417	Q8N159	ENSG00000161653_NAGS	-0.511238	2.32725	-3.49124	0.00102109	0.0422723	-0.915736
ENSG00000141506	PIK3R5	23533	X6R3K3	ENSG00000141506_PIK3R5	1.75647	-2.99771	3.48675	0.00103492	0.0425273	-0.954157
ENSG00000115365	LANCL1	10314	O43813	ENSG00000115365_LANCL1	0.282795	6.91588	3.4865	0.00103569	0.0425273	-1.51664
ENSG00000113580	NR3C1	2908	P04150	ENSG00000113580_NR3C1	0.344366	6.88633	3.48079	0.00105356	0.0429555	-1.526
ENSG00000010072	SPRTN	83932	Q9H040	ENSG00000010072_SPRTN	0.242345	4.88513	3.48138	0.0010517	0.0429555	-1.32667
ENSG00000141449	GREB1L	80000	NA	ENSG00000141449_GREB1L	-0.57931	2.32532	-3.4817	0.0010507	0.0429555	-1.35232
ENSG00000145029	NICN1	84276	Q9BSH3	ENSG00000145029_NICN1	-0.34241	3.67494	-3.47789	0.00106273	0.0432275	-1.15707
ENSG00000196517	SLC6A9	6536	B7Z3A9	ENSG00000196517_SLC6A9	-0.45275	4.60164	-3.47599	0.0010688	0.0433726	-1.36724
ENSG00000186493	C5orf38	153571	Q86SI9	ENSG00000186493_C5orf38	0.71823	3.82723	3.47202	0.00108157	0.0437883	-1.27934
ENSG00000142920	AZIN2	113451	NA	ENSG00000142920_AZIN2	-0.83057	0.590598	-3.47116	0.00108435	0.0437988	-0.844028
ENSG00000257743	MGAM2	93432	Q2M2H8	ENSG00000257743_MGAM2	-1.27302	2.5462	-3.46976	0.00108888	0.0438793	-1.44278
ENSG00000180818	HOXC10	3226	D6RAG4	ENSG00000180818_HOXC10	0.681884	3.84431	3.46668	0.00109894	0.0441821	-1.24209
ENSG00000054277	OPN3	23596	NA	ENSG00000054277_OPN3	-0.320011	5.35557	-3.46382	0.00110837	0.044458	-1.4628
ENSG00000080854	IGSF9B	22997	NA	ENSG00000080854_IGSF9B	1.47455	0.914498	3.46267	0.0011122	0.0445085	-0.886133
ENSG00000272720	CTA-228A9.3	NA	NA	ENSG00000272720_CTA-228A9.3	-0.993882	-0.958648	-3.46131	0.00111671	0.0445862	-0.868972
ENSG00000198730	CTR9	9646	Q6PD62	ENSG00000198730_CTR9	0.190938	6.78788	3.45965	0.00112228	0.0447053	-1.58887
ENSG00000157216	SSBP3	23648	NA	ENSG00000157216_SSBP3	0.429144	5.20893	3.458	0.00112781	0.0447446	-1.40383
ENSG00000196150	ZNF250	58500	E9PKP2	ENSG00000196150_ZNF250	-0.422727	2.73652	-3.45781	0.00112843	0.0447446	-1.04491
ENSG00000226598	NA	NA	NA	ENSG00000226598_NA	-1.27452	-4.80169	-3.45652	0.0011328	0.0448153	-1.17419
ENSG00000168038	ULK4	54986	NA	ENSG00000168038_ULK4	-0.724617	2.04385	-3.45564	0.00113578	0.044831	-1.00646
ENSG00000127585	FBXL16	146330	NA	ENSG00000127585_FBXL16	0.852035	0.870247	3.45174	0.00114906	0.0452523	-0.996049
ENSG00000108786	HSD17B1	3292	P14061	ENSG00000108786_HSD17B1	0.577434	3.55969	3.45071	0.00115259	0.0452881	-1.17395
ENSG00000070087	PFN2	5217	P35080	ENSG00000070087_PFN2	0.21446	7.76139	3.4466	0.00116678	0.0457422	-1.66665
ENSG00000062582	MRPS24	64951	Q96EL2	ENSG00000062582_MRPS24	-0.57026	0.392099	-3.44341	0.00117793	0.0460749	-0.98212
ENSG00000159399	HK2	3099	P52789	ENSG00000159399_HK2	0.315486	7.40738	3.44218	0.00118224	0.0461394	-1.67354
ENSG00000168785	TSPAN5	10098	D6RAR1	ENSG00000168785_TSPAN5	-0.744639	4.36108	-3.44048	0.00118824	0.0462694	-1.14249
ENSG00000041802	LSG1	55341	Q9H089	ENSG00000041802_LSG1	0.241658	6.19798	3.43881	0.00119418	0.0463963	-1.6155
ENSG00000137714	FDX1	2230	P10109	ENSG00000137714_FDX1	0.287764	4.84689	3.43688	0.00120103	0.0464841	-1.44143
ENSG00000127511	SIN3B	23309	O75182	ENSG00000127511_SIN3B	-0.207171	6.57475	-3.43593	0.00120445	0.0464841	-1.65185
ENSG00000164749	HNF4G	3174	NA	ENSG00000164749_HNF4G	-1.75395	-3.05154	-3.43592	0.00120449	0.0464841	-0.997949
ENSG00000158104	HPD	3242	A0A0B4J1R4	ENSG00000158104_HPD	1.56354	-4.05946	3.43159	0.00122008	0.0468772	-1.15003
ENSG00000023902	PLEKHO1	51177	Q5T4P9	ENSG00000023902_PLEKHO1	-0.950932	2.4271	-3.43181	0.0012193	0.0468772	-1.06027
ENSG00000135549	PKIB	5570	Q9C010	ENSG00000135549_PKIB	-1.22477	2.47464	-3.42874	0.00123044	0.0471705	-1.25079
ENSG00000267279	RP11-879F14.2	NA	NA	ENSG00000267279_RP11-879F14.2	0.978005	0.957877	3.42716	0.00123625	0.0472885	-0.956841
ENSG00000204540	PSORS1C1	170679	NA	ENSG00000204540_PSORS1C1	0.649783	1.68328	3.42495	0.00124437	0.04739	-1.15677
ENSG00000255031	RP11-802E16.3	NA	NA	ENSG00000255031_RP11-802E16.3	-0.6397	0.679115	-3.42548	0.00124244	0.04739	-1.05883
ENSG00000267508	ZNF285	26974	Q96NJ3	ENSG00000267508_ZNF285	-0.545166	0.92127	-3.4225	0.00125347	0.0476318	-0.998929
ENSG00000204837	FGF7P3	NA	NA	ENSG00000204837_FGF7P3	1.22014	-1.84862	3.41964	0.00126417	0.0477247	-1.02934
ENSG00000165868	HSPA12A	259217	O43301	ENSG00000165868_HSPA12A	0.735309	3.24389	3.41997	0.00126291	0.0477247	-1.1925
ENSG00000230082	PRRT3-AS1	100874032	NA	ENSG00000230082_PRRT3-AS1	0.705051	0.888125	3.42002	0.00126273	0.0477247	-1.00188
ENSG00000082805	ERC1	23085	K7EKH8	ENSG00000082805_ERC1	0.253494	7.24275	3.41693	0.00127438	0.0480052	-1.72154
ENSG00000197448	GSTK1	373156	C9JNT3	ENSG00000197448_GSTK1	-0.236636	6.73455	-3.41276	0.00129022	0.0484965	-1.72359
ENSG00000106013	ANKRD7	56311	NA	ENSG00000106013_ANKRD7	1.22679	-1.58228	3.41048	0.00129898	0.0487201	-1.09458
ENSG00000087495	PHACTR3	116154	Q96KR7	ENSG00000087495_PHACTR3	1.22705	-0.132408	3.40608	0.00131599	0.0490399	-1.0391
ENSG00000176273	SLC35G1	159371	Q2M3R5	ENSG00000176273_SLC35G1	0.315962	3.94815	3.40654	0.00131421	0.0490399	-1.38794
ENSG00000074527	NTN4	59277	Q9HB63	ENSG00000074527_NTN4	-0.576271	6.52829	-3.40681	0.00131317	0.0490399	-1.74961
ENSG00000017373	NA	NA	NA	ENSG00000017373_NA	0.979621	1.06515	3.40403	0.00132403	0.0491209	-1.04387
ENSG00000261804	RP11-44F14.2	102723373	NA	ENSG00000261804_RP11-44F14.2	0.703311	0.367449	3.40477	0.0013211	0.0491209	-1.02595
ENSG00000167258	CDK12	51755	J3QSD7	ENSG00000167258_CDK12	0.194909	7.37167	3.40292	0.00132839	0.0491209	-1.77999
ENSG00000124357	NAGK	55577	NA	ENSG00000124357_NAGK	-0.321252	4.85011	-3.40263	0.00132951	0.0491209	-1.58736
ENSG00000104863	LIN7B	64130	Q9HAP6	ENSG00000104863_LIN7B	-0.708506	0.171126	-3.40116	0.00133533	0.049231	-1.02714
ENSG00000063169	GLTSCR1	29998	Q9NZM4	ENSG00000063169_GLTSCR1	-0.233396	4.18132	-3.39705	0.00135164	0.0497267	-1.52329

## Sheet: B DE Old vs Young in MEP
EnsemblID	EnsDb.Hsapiens.v86.GeneSYM	EnsDb.Hsapiens.v86.EntrezID	EnsDb.Hsapiens.v86.UniprotID	EnsemblID.GeneSYM	logFC	AveExpr	t	P.Value	adj.P.Val	B
ENSG00000204764	RANBP17	64901	NA	ENSG00000204764_RANBP17	-1.75215	2.30793	-7.36814	1.68803e-09	2.92503e-05	10.5476
ENSG00000171612	SLC25A33	84275	Q9BSK2	ENSG00000171612_SLC25A33	-0.931783	2.70497	-7.06742	4.95266e-09	4.29099e-05	10.2418
ENSG00000198477	NA	NA	NA	ENSG00000198477_NA	-2.08174	0.363745	-5.38877	1.96437e-06	0.0113462	3.98886
ENSG00000077264	PAK3	5063	NA	ENSG00000077264_PAK3	-0.755421	3.75647	-5.15825	4.38793e-06	0.016416	4.08554
ENSG00000151067	CACNA1C	775	F5H0X0	ENSG00000151067_CACNA1C	-2.83339	-2.76138	-5.13618	4.73686e-06	0.016416	2.91486
ENSG00000143537	ADAM15	8751	NA	ENSG00000143537_ADAM15	0.516666	8.28251	5.08169	5.71986e-06	0.016519	3.57401
ENSG00000144366	GULP1	51454	Q9UBP9	ENSG00000144366_GULP1	-1.23033	3.91279	-4.96063	8.68055e-06	0.0214881	3.48613
ENSG00000146477	SLC22A3	6581	O75751	ENSG00000146477_SLC22A3	1.82225	-0.103461	4.75653	1.74272e-05	0.0232292	2.78198
ENSG00000141655	TNFRSF11A	8792	NA	ENSG00000141655_TNFRSF11A	0.87126	3.76601	4.76908	1.67e-05	0.0232292	2.88383
ENSG00000178163	ZNF518B	85460	Q9C0D4	ENSG00000178163_ZNF518B	-0.396963	5.75084	-4.79039	1.55335e-05	0.0232292	2.69689
ENSG00000144057	ST6GAL2	84620	Q96JF0	ENSG00000144057_ST6GAL2	-2.36915	-3.5058	-4.77034	1.66291e-05	0.0232292	1.62783
ENSG00000106236	NPTX2	4885	P47972	ENSG00000106236_NPTX2	-2.92108	-2.51115	-4.83756	1.32279e-05	0.0232292	2.13305
ENSG00000198795	ZNF521	25925	Q96K83	ENSG00000198795_ZNF521	-3.11851	-1.64702	-4.84485	1.29033e-05	0.0232292	2.24338
ENSG00000124429	POF1B	79983	Q8WVV4	ENSG00000124429_POF1B	2.27333	1.34133	4.7085	2.05074e-05	0.0236902	2.57534
ENSG00000273209	RP11-107N15.1	NA	NA	ENSG00000273209_RP11-107N15.1	-1.63993	-1.90262	-4.71977	1.97395e-05	0.0236902	1.64963
ENSG00000204540	PSORS1C1	170679	NA	ENSG00000204540_PSORS1C1	1.2523	1.68328	4.68437	2.22499e-05	0.0240967	2.53167
ENSG00000164659	KIAA1324L	222223	A8MWY0	ENSG00000164659_KIAA1324L	1.27171	2.60665	4.57496	3.21539e-05	0.028869	2.27467
ENSG00000165025	SYK	6850	P43405	ENSG00000165025_SYK	1.26739	3.84204	4.57499	3.21515e-05	0.028869	2.23565
ENSG00000128594	LRRC4	64101	Q9HBW1	ENSG00000128594_LRRC4	0.972885	2.39846	4.57749	3.18826e-05	0.028869	2.28841
ENSG00000253873	PCDHGA11	56105	Q9Y5H2	ENSG00000253873_PCDHGA11	-0.886931	1.61971	-4.56433	3.33206e-05	0.028869	2.21747
ENSG00000265992	ESRG	790952	NA	ENSG00000265992_ESRG	-3.86065	-3.00404	-4.54801	3.51912e-05	0.0290377	1.38633
ENSG00000176092	AIM1L	55057	E9PIR9	ENSG00000176092_AIM1L	0.890608	4.46881	4.5005	4.12436e-05	0.032485	2.02818
ENSG00000168447	SCNN1B	6338	NA	ENSG00000168447_SCNN1B	2.36246	2.01942	4.44345	4.98635e-05	0.0375667	1.55604
ENSG00000147676	MAL2	114569	A0A087WZL1	ENSG00000147676_MAL2	0.887581	7.79122	4.4017	5.72604e-05	0.041342	1.36861
ENSG00000144227	NXPH2	11249	O95156	ENSG00000144227_NXPH2	-2.00639	-3.44869	-4.37507	6.25291e-05	0.0433402	0.859465
ENSG00000196914	ARHGEF12	23365	Q9NZN5	ENSG00000196914_ARHGEF12	0.317789	7.24469	4.34917	6.81046e-05	0.0453891	1.19548
ENSG00000260027	HOXB7	3217	P09629	ENSG00000260027_HOXB7	2.30725	-1.42411	4.30456	7.88634e-05	0.0471222	0.91116
ENSG00000069011	PITX1	5307	P78337	ENSG00000069011_PITX1	1.96832	2.38518	4.31258	7.68144e-05	0.0471222	1.48483
ENSG00000143653	SCCPDH	51097	Q8NBX0	ENSG00000143653_SCCPDH	-0.569932	4.76215	-4.3216	7.45706e-05	0.0471222	1.41436

## Sheet: C DV Old vs Young in LEP
EnsemblID	EnsDb.Hsapiens.v86.GeneSYM	EnsDb.Hsapiens.v86.EntrezID	EnsDb.Hsapiens.v86.UniprotID	EnsemblID.GeneSYM	log2FC.dispersion	Statistics.dispersion	Pvalue.dispersion	FDR.dispersion
ENSG00000006534	ALDH3B1	221	P43353	ENSG00000006534_ALDH3B1	-6.65039	-10.6105	2.6629e-26	3.77998e-22
ENSG00000136100	VPS36	51028	Q86VN1	ENSG00000136100_VPS36	-5.2524	-8.49943	1.90526e-17	1.35226e-13
ENSG00000132972	RNF17	56163	Q9BXT8	ENSG00000132972_RNF17	14.2602	8.20083	2.38732e-16	1.1296e-12
ENSG00000254148	NA	NA	NA	ENSG00000254148_NA	3.78605	8.02844	9.87191e-16	2.80263e-12
ENSG00000118689	FOXO3	2309	O43524	ENSG00000118689_FOXO3	-4.96992	-8.05285	8.08904e-16	2.80263e-12
ENSG00000141562	NARF	26502	J3KS03	ENSG00000141562_NARF	-4.68145	-7.59724	3.02502e-14	7.15668e-11
ENSG00000176887	SOX11	6664	P35716	ENSG00000176887_SOX11	-5.01348	-6.74447	1.53592e-11	3.11462e-08
ENSG00000116731	PRDM2	7799	D6RAA0	ENSG00000116731_PRDM2	-4.14486	-6.71995	1.8179e-11	3.22563e-08
ENSG00000137709	POU2F3	25833	Q9UKI9	ENSG00000137709_POU2F3	-3.78186	-6.18751	6.11237e-10	9.64057e-07
ENSG00000105640	RPL18A	6142	Q02543	ENSG00000105640_RPL18A	-3.47334	-5.63829	1.71747e-08	2.21632e-05
ENSG00000145723	GIN1	54826	Q9NXP7	ENSG00000145723_GIN1	-3.50212	-5.64988	1.60561e-08	2.21632e-05
ENSG00000246089	RP11-115C21.2	100287015	NA	ENSG00000246089_RP11-115C21.2	-3.42844	-5.58448	2.34404e-08	2.77281e-05
ENSG00000213654	GPSM3	63940	E9PIP3	ENSG00000213654_GPSM3	-3.44739	-5.56286	2.65395e-08	2.89791e-05
ENSG00000196966	NA	NA	NA	ENSG00000196966_NA	1.72874	5.47124	4.46891e-08	4.53116e-05
ENSG00000022976	ZNF839	55778	A8K0R7	ENSG00000022976_ZNF839	-3.33114	-5.40568	6.45646e-08	6.10996e-05
ENSG00000185049	NELFA	100126332	A0A0C4DFX9	ENSG00000185049_NELFA	5.50656	5.33719	9.4399e-08	8.1565e-05
ENSG00000215012	C22orf29	79680	Q7L3V2	ENSG00000215012_C22orf29	3.84462	5.33098	9.76826e-08	8.1565e-05
ENSG00000240859	AC093627.10	NA	NA	ENSG00000240859_AC093627.10	-3.3338	-5.27226	1.34751e-07	0.000106266
ENSG00000204866	IGFL2	147920	NA	ENSG00000204866_IGFL2	-3.82234	-5.2597	1.44289e-07	0.000107799
ENSG00000112592	TBP	6908	Q7Z6S5	ENSG00000112592_TBP	3.70587	5.09911	3.41259e-07	0.000242208
ENSG00000176749	CDK5R1	8851	Q15078	ENSG00000176749_CDK5R1	-3.13943	-5.03797	4.70494e-07	0.000318032
ENSG00000136404	TM6SF1	53346	Q9BZW5	ENSG00000136404_TM6SF1	-0.938986	-4.99497	5.88438e-07	0.000348037
ENSG00000197385	ZNF860	344787	NA	ENSG00000197385_ZNF860	-4.93526	-4.99952	5.74724e-07	0.000348037
ENSG00000258545	RHOXF1-AS1	101928969	NA	ENSG00000258545_RHOXF1-AS1	-5.19927	-5.00803	5.49911e-07	0.000348037
ENSG00000125734	GPR108	102465474	Q9NPR9	ENSG00000125734_GPR108	4.79295	4.95102	7.38247e-07	0.000419177
ENSG00000165338	HECTD2	143279	A0A0J9YVV1	ENSG00000165338_HECTD2	4.85617	4.89365	9.89852e-07	0.000540421
ENSG00000168917	SLC35G2	80723	NA	ENSG00000168917_SLC35G2	-3.00235	-4.84421	1.27115e-06	0.000668298
ENSG00000166126	AMN	81693	Q9BXJ7	ENSG00000166126_AMN	3.06482	4.83439	1.33554e-06	0.000677071
ENSG00000170919	TPT1-AS1	NA	NA	ENSG00000170919_TPT1-AS1	-5.02992	-4.8079	1.52526e-06	0.000746591
ENSG00000127129	EDN2	1907	P20800	ENSG00000127129_EDN2	-2.75037	-4.78996	1.6681e-06	0.000789291
ENSG00000176024	ZNF613	79898	NA	ENSG00000176024_ZNF613	3.48456	4.77932	1.7589e-06	0.000805407
ENSG00000125735	TNFSF14	8740	O43557	ENSG00000125735_TNFSF14	-5.1543	-4.75331	2.00111e-06	0.000887681
ENSG00000152213	ARL11	115761	Q969Q4	ENSG00000152213_ARL11	-2.71152	-4.73734	2.16537e-06	0.000931437
ENSG00000142197	DOPEY2	9980	F8W8U9	ENSG00000142197_DOPEY2	-4.65663	-4.70961	2.48188e-06	0.00103619
ENSG00000128487	SPECC1	92521	NA	ENSG00000128487_SPECC1	4.52987	4.67301	2.96819e-06	0.00120381
ENSG00000198797	BRINP2	57795	Q9C0B6	ENSG00000198797_BRINP2	-2.38041	-4.65601	3.22397e-06	0.00121959
ENSG00000047579	DTNBP1	84062	Q96EV8	ENSG00000047579_DTNBP1	-2.87388	-4.65341	3.26484e-06	0.00121959
ENSG00000118600	TMEM5	10329	Q9Y2B1	ENSG00000118600_TMEM5	-4.61291	-4.65744	3.2016e-06	0.00121959
ENSG00000249356	NA	NA	NA	ENSG00000249356_NA	-3.86186	-4.60093	4.206e-06	0.00153087
ENSG00000213366	GSTM2	2946	F6XZQ7	ENSG00000213366_GSTM2	-2.80495	-4.56605	4.96996e-06	0.0017207
ENSG00000115468	EFHD1	80303	Q9BUP0	ENSG00000115468_EFHD1	-4.87226	-4.57104	4.85298e-06	0.0017207
ENSG00000233452	STXBP5-AS1	NA	NA	ENSG00000233452_STXBP5-AS1	-2.9638	-4.53379	5.79353e-06	0.00195807
ENSG00000023839	ABCC2	1244	Q92887	ENSG00000023839_ABCC2	3.18782	4.50504	6.63599e-06	0.00219065
ENSG00000196437	ZNF569	148266	Q5MCW4	ENSG00000196437_ZNF569	-2.91347	-4.47828	7.52472e-06	0.00239256
ENSG00000127252	HRASLS	57110	X6R3D1	ENSG00000127252_HRASLS	-3.08232	-4.47658	7.58473e-06	0.00239256
ENSG00000153531	ADPRHL1	113622	A0A0U1RQK4	ENSG00000153531_ADPRHL1	-3.62134	-4.47075	7.79471e-06	0.00240535
ENSG00000182986	ZNF320	162967	NA	ENSG00000182986_ZNF320	-4.41197	-4.45248	8.48852e-06	0.00256372
ENSG00000204386	NEU1	4758	NA	ENSG00000204386_NEU1	4.29739	4.43753	9.09958e-06	0.00269101
ENSG00000111850	SMIM8	63914	Q96KF7	ENSG00000111850_SMIM8	-2.71577	-4.4114	1.02704e-05	0.00297526
ENSG00000198286	CARD11	84433	Q9BXL7	ENSG00000198286_CARD11	-4.56766	-4.39747	1.09519e-05	0.00310924
ENSG00000153956	CACNA2D1	781	P54289	ENSG00000153956_CACNA2D1	-4.37047	-4.36304	1.28268e-05	0.00357014
ENSG00000198643	FAM3D	131177	Q96BQ1	ENSG00000198643_FAM3D	-3.31556	-4.34307	1.40505e-05	0.00376314
ENSG00000034053	APBA2	321	Q99767	ENSG00000034053_APBA2	-4.34955	-4.34345	1.40264e-05	0.00376314
ENSG00000133026	MYH10	4628	P35580	ENSG00000133026_MYH10	4.19474	4.31159	1.62088e-05	0.00426082
ENSG00000007062	PROM1	8842	H0Y9D4	ENSG00000007062_PROM1	4.23085	4.2935	1.75879e-05	0.00453929
ENSG00000172878	METAP1D	254042	Q6UB28	ENSG00000172878_METAP1D	-2.64468	-4.28189	1.85311e-05	0.0046973
ENSG00000109572	CLCN3	1182	D6RDZ6	ENSG00000109572_CLCN3	4.13665	4.25468	2.09345e-05	0.00521343
ENSG00000103544	C16orf62	57020	H3BRV8	ENSG00000103544_C16orf62	-4.166	-4.22749	2.36318e-05	0.00578367
ENSG00000180855	ZNF443	10224	Q9Y2A4	ENSG00000180855_ZNF443	-2.52285	-4.21197	2.53153e-05	0.00609068
ENSG00000043514	TRIT1	54802	Q9H3H1	ENSG00000043514_TRIT1	4.09491	4.19255	2.75839e-05	0.0064189
ENSG00000169860	P2RY1	5028	P47900	ENSG00000169860_P2RY1	3.15116	4.193	2.75295e-05	0.0064189
ENSG00000089094	KDM2B	102465665	Q8NHM5	ENSG00000089094_KDM2B	4.05948	4.17067	3.037e-05	0.00695327
ENSG00000185808	PIGP	51227	P57054	ENSG00000185808_PIGP	3.95067	4.15108	3.30916e-05	0.0074561
ENSG00000188290	HES4	57801	E9PB28	ENSG00000188290_HES4	4.01865	4.11498	3.87215e-05	0.00845619
ENSG00000119514	GALNT12	79695	Q8IXK2	ENSG00000119514_GALNT12	2.99987	4.11623	3.85119e-05	0.00845619
ENSG00000196353	CPNE4	131034	NA	ENSG00000196353_CPNE4	-4.07623	-4.09033	4.30753e-05	0.00926444
ENSG00000260855	RP11-439E19.10	NA	NA	ENSG00000260855_RP11-439E19.10	-2.59568	-4.08293	4.44713e-05	0.00942195
ENSG00000126524	SBDS	51119	Q9Y3A5	ENSG00000126524_SBDS	-4.02031	-4.07393	4.62267e-05	0.00964982
ENSG00000106366	SERPINE1	5054	P05121	ENSG00000106366_SERPINE1	-4.05761	-4.0353	5.45326e-05	0.0112187
ENSG00000205592	MUC19	NA	NA	ENSG00000205592_MUC19	3.28579	4.02628	5.6667e-05	0.0114913
ENSG00000197061	HIST1H4C	8364	P62805	ENSG00000197061_HIST1H4C	4.77395	4.01851	5.85664e-05	0.0117092
ENSG00000268739	CTC-518B2.12	NA	NA	ENSG00000268739_CTC-518B2.12	-2.52804	-4.0152	5.93943e-05	0.0117097
ENSG00000166796	LDHC	3948	P07864	ENSG00000166796_LDHC	3.57018	3.99522	6.46334e-05	0.0125681
ENSG00000233834	AC005083.1	100506098	NA	ENSG00000233834_AC005083.1	2.58413	3.99029	6.59919e-05	0.0126589
ENSG00000111087	GLI1	2735	E9PIB9	ENSG00000111087_GLI1	3.21835	3.94624	7.93892e-05	0.0150257
ENSG00000225526	MKRN2OS	100129480	NA	ENSG00000225526_MKRN2OS	-2.38259	-3.92346	8.7288e-05	0.0163033
ENSG00000137478	FCHSD2	9873	O94868	ENSG00000137478_FCHSD2	3.79044	3.90262	9.51586e-05	0.0175425
ENSG00000171219	CDC42BPG	55561	Q6DT37	ENSG00000171219_CDC42BPG	3.77385	3.89029	0.000100125	0.0179907
ENSG00000173698	ADGRG2	10149	Q8IZP9	ENSG00000173698_ADGRG2	-5.3056	-3.89146	9.96439e-05	0.0179907
ENSG00000018236	CNTN1	1272	Q12860	ENSG00000018236_CNTN1	4.03761	3.87658	0.000105934	0.0187966
ENSG00000164610	RP9	6100	Q8TA86	ENSG00000164610_RP9	-2.44901	-3.8643	0.000111409	0.0195241
ENSG00000144893	MED12L	116931	NA	ENSG00000144893_MED12L	2.76784	3.85333	0.00011652	0.0201708
ENSG00000217930	PAM16	51025	I3L1U7	ENSG00000217930_PAM16	-2.35926	-3.84158	0.000122245	0.0209069
ENSG00000183793	NPIPA5	101059953	E9PKD4	ENSG00000183793_NPIPA5	3.29176	3.82703	0.000129698	0.0219175
ENSG00000168795	ZBTB5	9925	O15062	ENSG00000168795_ZBTB5	3.69084	3.80722	0.000140536	0.0234694
ENSG00000164674	SYTL3	94120	NA	ENSG00000164674_SYTL3	2.72778	3.79789	0.000145933	0.0240875
ENSG00000118640	VAMP8	8673	C9JXZ5	ENSG00000118640_VAMP8	3.67488	3.79244	0.000149177	0.0243398
ENSG00000115828	QPCT	25797	Q16769	ENSG00000115828_QPCT	3.74162	3.77971	0.000157009	0.0249719
ENSG00000249116	CTD-2194D22.3	NA	NA	ENSG00000249116_CTD-2194D22.3	-2.65665	-3.77763	0.000158329	0.0249719
ENSG00000185000	DGAT1	102465511	O75907	ENSG00000185000_DGAT1	-3.75533	-3.78193	0.000155616	0.0249719
ENSG00000107897	ACBD5	91452	Q5T8D3	ENSG00000107897_ACBD5	-3.73153	-3.77306	0.00016126	0.0251549
ENSG00000243811	APOBEC3D	140564	Q96AK3	ENSG00000243811_APOBEC3D	-3.82991	-3.76706	0.000165179	0.0254861
ENSG00000254087	LYN	4067	P07948	ENSG00000254087_LYN	3.64666	3.75489	0.000173421	0.0256788
ENSG00000271043	MTRNR2L2	NA	NA	ENSG00000271043_MTRNR2L2	2.80666	3.75842	0.000170988	0.0256788
ENSG00000141255	SPATA22	84690	Q8NHS9	ENSG00000141255_SPATA22	-3.59669	-3.76002	0.000169902	0.0256788
ENSG00000115041	KCNIP3	30818	Q9Y2W7	ENSG00000115041_KCNIP3	-3.73116	-3.75453	0.000173664	0.0256788
ENSG00000164691	TAGAP	117289	Q8N103	ENSG00000164691_TAGAP	3.68524	3.72884	0.000192365	0.0278862
ENSG00000133056	PIK3C2B	5287	O00750	ENSG00000133056_PIK3C2B	3.54451	3.72863	0.000192522	0.0278862
ENSG00000079459	FDFT1	2222	E9PJG4	ENSG00000079459_FDFT1	3.74891	3.72122	0.000198262	0.0284276
ENSG00000135373	EHF	26298	NA	ENSG00000135373_EHF	3.63639	3.70789	0.000208992	0.0294717
ENSG00000270189	RP11-258C19.7	NA	NA	ENSG00000270189_RP11-258C19.7	-2.31322	-3.70704	0.000209697	0.0294717
ENSG00000174125	TLR1	7096	NA	ENSG00000174125_TLR1	3.63327	3.70436	0.000211927	0.0294931
ENSG00000151611	MMAA	166785	Q8IVH4	ENSG00000151611_MMAA	-3.64538	-3.70147	0.000214352	0.0295411
ENSG00000235999	NA	NA	NA	ENSG00000235999_NA	-2.28957	-3.69764	0.000217615	0.0297023
ENSG00000123191	ATP7B	540	NA	ENSG00000123191_ATP7B	3.53522	3.69211	0.000222402	0.029783
ENSG00000176399	DMRTA1	63951	Q5VZB9	ENSG00000176399_DMRTA1	2.76865	3.6937	0.000221018	0.029783
ENSG00000070371	CLTCL1	8218	P53675	ENSG00000070371_CLTCL1	-3.74908	-3.68244	0.000231013	0.030647
ENSG00000110375	UPK2	7379	NA	ENSG00000110375_UPK2	-2.74738	-3.63651	0.000276359	0.0363233
ENSG00000169242	EFNA1	1942	P20827	ENSG00000169242_EFNA1	3.4967	3.62913	0.00028438	0.0367794
ENSG00000133627	ACTR3B	57180	Q9P1U1	ENSG00000133627_ACTR3B	-3.73602	-3.62856	0.000285011	0.0367794
ENSG00000241878	PISD	102465666	Q9UG56	ENSG00000241878_PISD	3.52489	3.62313	0.000291061	0.0370505
ENSG00000164542	KIAA0895	23366	Q8NCT3	ENSG00000164542_KIAA0895	-3.45085	-3.62077	0.000293728	0.0370505
ENSG00000102038	SMARCA1	6594	NA	ENSG00000102038_SMARCA1	-3.61139	-3.6197	0.000294942	0.0370505
ENSG00000197181	PIWIL2	55124	Q8TC59	ENSG00000197181_PIWIL2	4.28151	3.61546	0.000299815	0.0373322
ENSG00000067225	PKM	5315	NA	ENSG00000067225_PKM	-3.56298	-3.60583	0.000311158	0.0384077
ENSG00000229729	NA	NA	NA	ENSG00000229729_NA	-2.27109	-3.59951	0.000318813	0.0390133
ENSG00000143373	ZNF687	57592	A2A3Q2	ENSG00000143373_ZNF687	3.47208	3.58563	0.000336261	0.0407968
ENSG00000173809	TDRD12	91646	Q587J7	ENSG00000173809_TDRD12	4.4763	3.57734	0.000347107	0.0414049
ENSG00000211456	SACM1L	22908	NA	ENSG00000211456_SACM1L	-3.54405	-3.57891	0.000345034	0.0414049
ENSG00000171368	TPPP	11076	O94811	ENSG00000171368_TPPP	-3.53155	-3.56847	0.000359066	0.0424745
ENSG00000112763	BTN2A1	11120	H7BYC3	ENSG00000112763_BTN2A1	3.4603	3.56281	0.000366902	0.0426899
ENSG00000163702	IL17RC	84818	Q8NAC3	ENSG00000163702_IL17RC	3.45986	3.56376	0.000365576	0.0426899
ENSG00000204439	C6orf47	57827	O95873	ENSG00000204439_C6orf47	-3.52526	-3.55614	0.000376348	0.043433
ENSG00000134258	VTCN1	79679	Q5T2L0	ENSG00000134258_VTCN1	3.57804	3.54942	0.000386077	0.0441965
ENSG00000064601	CTSA	5476	NA	ENSG00000064601_CTSA	3.37083	3.54183	0.000397362	0.0444138
ENSG00000183784	C9orf66	157983	Q5T8R8	ENSG00000183784_C9orf66	2.26588	3.54209	0.000396971	0.0444138
ENSG00000091831	ESR1	2099	NA	ENSG00000091831_ESR1	-3.53842	-3.54503	0.000392573	0.0444138
ENSG00000147996	CBWD5	644019	Q5RIA9	ENSG00000147996_CBWD5	2.76324	3.53956	0.0004008	0.0444481
ENSG00000176732	PFN4	375189	Q8NHR9	ENSG00000176732_PFN4	-2.20544	-3.51744	0.000435738	0.0475793
ENSG00000179562	GCC1	79571	Q96CN9	ENSG00000179562_GCC1	-3.4836	-3.51845	0.000434083	0.0475793
ENSG00000170545	SMAGP	57228	Q0VAQ4	ENSG00000170545_SMAGP	3.41331	3.51312	0.000442883	0.0479902
ENSG00000116990	MYCL	4610	P12524	ENSG00000116990_MYCL	3.35337	3.50862	0.000450443	0.0484397
ENSG00000266088	RP5-1028K7.2	NA	NA	ENSG00000266088_RP5-1028K7.2	2.71093	3.50258	0.000460781	0.0488554
ENSG00000154263	ABCA10	10349	K7ERP5	ENSG00000154263_ABCA10	-2.17285	-3.50036	0.000464633	0.0488554
ENSG00000180287	PLD5	200150	Q8N7P1	ENSG00000180287_PLD5	-3.53891	-3.50166	0.000462363	0.0488554
ENSG00000183621	ZNF438	220929	V9GYJ1	ENSG00000183621_ZNF438	3.18197	3.49523	0.00047366	0.0490774
ENSG00000164400	CSF2	1437	P04141	ENSG00000164400_CSF2	-3.79018	-3.49704	0.000470458	0.0490774

## Sheet: D DV Old vs Young in MEP
EnsemblID	EnsDb.Hsapiens.v86.GeneSYM	EnsDb.Hsapiens.v86.EntrezID	EnsDb.Hsapiens.v86.UniprotID	EnsemblID.GeneSYM	log2FC.dispersion	Statistics.dispersion	Pvalue.dispersion	FDR.dispersion
ENSG00000142530	FAM71E1	112703	A0A075B7A4	ENSG00000142530_FAM71E1	-5.94782	-7.94517	1.93926e-15	2.73997e-11
ENSG00000032219	ARID4A	5926	P29374	ENSG00000032219_ARID4A	-3.32024	-7.49513	6.62342e-14	4.67912e-10
ENSG00000094755	GABRP	2568	E5RG98	ENSG00000094755_GABRP	8.75076	7.16748	7.63936e-13	3.59788e-09
ENSG00000118849	RARRES1	5918	P49788	ENSG00000118849_RARRES1	8.44181	6.9717	3.13133e-12	1.10606e-08
ENSG00000217930	PAM16	51025	I3L1U7	ENSG00000217930_PAM16	-3.53013	-6.88358	5.83654e-12	1.37441e-08
ENSG00000149716	ORAOV1	220064	NA	ENSG00000149716_ORAOV1	-4.28535	-6.90912	4.87674e-12	1.37441e-08
ENSG00000185551	NR2F2	100302258	P24468	ENSG00000185551_NR2F2	-5.74777	-6.62815	3.39925e-11	6.86114e-08
ENSG00000099957	P2RX6	9127	NA	ENSG00000099957_P2RX6	-4.32897	-6.58334	4.6e-11	8.12417e-08
ENSG00000083535	PIBF1	10464	Q8WXW3	ENSG00000083535_PIBF1	-3.97908	-6.45045	1.11518e-10	1.75071e-07
ENSG00000022976	ZNF839	55778	A8K0R7	ENSG00000022976_ZNF839	-3.78355	-6.15331	7.58828e-10	1.00854e-06
ENSG00000109083	IFT20	90410	NA	ENSG00000109083_IFT20	-3.97374	-6.14789	7.8519e-10	1.00854e-06
ENSG00000157445	CACNA2D3	55799	Q8IZS8	ENSG00000157445_CACNA2D3	-6.02168	-5.89481	3.75117e-09	4.4167e-06
ENSG00000099256	PRTFDC1	56952	Q9NRG1	ENSG00000099256_PRTFDC1	2.74057	5.79685	6.75702e-09	7.34384e-06
ENSG00000267248	CTD-2319I12.4	NA	NA	ENSG00000267248_CTD-2319I12.4	-1.85408	-5.7634	8.24378e-09	8.31974e-06
ENSG00000172379	ARNT2	100847042	NA	ENSG00000172379_ARNT2	-3.60114	-5.64078	1.69279e-08	1.5945e-05
ENSG00000269968	RP5-940J5.9	NA	NA	ENSG00000269968_RP5-940J5.9	-5.34615	-5.47452	4.38704e-08	3.87403e-05
ENSG00000135929	CYP27A1	1593	NA	ENSG00000135929_CYP27A1	-3.44017	-5.3757	7.62866e-08	6.34031e-05
ENSG00000172687	ZNF738	NA	Q8NE65	ENSG00000172687_ZNF738	-3.2195	-5.19026	2.09995e-07	0.000164835
ENSG00000269028	MTRNR2L12	100462981	P0DMP1	ENSG00000269028_MTRNR2L12	-6.52987	-5.131	2.88204e-07	0.000214318
ENSG00000234264	DEPDC1-AS1	101927220	NA	ENSG00000234264_DEPDC1-AS1	-3.29793	-5.10313	3.34076e-07	0.0002262
ENSG00000108474	PIGL	9487	NA	ENSG00000108474_PIGL	-3.63553	-5.10193	3.36202e-07	0.0002262
ENSG00000198794	SCAMP5	192683	H3BP89	ENSG00000198794_SCAMP5	-5.50342	-5.07706	3.83317e-07	0.000246177
ENSG00000204866	IGFL2	147920	NA	ENSG00000204866_IGFL2	-4.12067	-5.00527	5.5784e-07	0.000342683
ENSG00000176845	METRNL	284207	Q641Q3	ENSG00000176845_METRNL	-2.62187	-4.97386	6.5634e-07	0.000386393
ENSG00000169247	SH3TC2	79628	E9PDF1	ENSG00000169247_SH3TC2	-4.92784	-4.96108	7.01006e-07	0.00039618
ENSG00000144395	CCDC150	284992	E9PCV3	ENSG00000144395_CCDC150	-2.16367	-4.92559	8.41081e-07	0.000440135
ENSG00000258545	RHOXF1-AS1	101928969	NA	ENSG00000258545_RHOXF1-AS1	-4.96283	-4.93155	8.1581e-07	0.000440135
ENSG00000169239	CA5B	11238	C9IZP3	ENSG00000169239_CA5B	-3.08087	-4.86399	1.15044e-06	0.000557776
ENSG00000170677	SOCS6	9306	O14544	ENSG00000170677_SOCS6	-4.61587	-4.8634	1.15385e-06	0.000557776
ENSG00000130340	SNX9	51429	A0A087WZW2	ENSG00000130340_SNX9	-4.80963	-4.85824	1.18432e-06	0.000557776
ENSG00000147180	ZNF711	7552	Q9Y462	ENSG00000147180_ZNF711	-2.86888	-4.59381	4.35221e-06	0.00198362
ENSG00000215915	ATAD3C	219293	Q5T2N8	ENSG00000215915_ATAD3C	-2.96271	-4.57369	4.79202e-06	0.00209453
ENSG00000185324	CDK10	8558	F8W872	ENSG00000185324_CDK10	-4.50999	-4.56937	4.89204e-06	0.00209453
ENSG00000109794	FAM149A	25854	A5PLN7	ENSG00000109794_FAM149A	-2.93621	-4.52225	6.11859e-06	0.00254263
ENSG00000155754	ALS2CR11	151254	Q53TS8	ENSG00000155754_ALS2CR11	-2.52351	-4.48775	7.19808e-06	0.00290576
ENSG00000162482	AKR7A3	22977	O95154	ENSG00000162482_AKR7A3	-3.18072	-4.47471	7.65157e-06	0.00300303
ENSG00000179523	EIF3J-AS1	NA	NA	ENSG00000179523_EIF3J-AS1	-3.38268	-4.4239	9.69334e-06	0.00370155
ENSG00000158887	MPZ	4359	P25189	ENSG00000158887_MPZ	-2.75339	-4.37331	1.22378e-05	0.00455023
ENSG00000144668	ITGA9	3680	E9PDS3	ENSG00000144668_ITGA9	-2.87491	-4.34784	1.37485e-05	0.00498082
ENSG00000146122	DAAM2	23500	A0A0J9YYF7	ENSG00000146122_DAAM2	-4.49003	-4.32515	1.52431e-05	0.00538424
ENSG00000166974	MAPRE2	10982	K7ERD8	ENSG00000166974_MAPRE2	4.20742	4.31461	1.59883e-05	0.00550974
ENSG00000272808	RP11-66B24.7	NA	NA	ENSG00000272808_RP11-66B24.7	-4.77227	-4.28018	1.86742e-05	0.00628208
ENSG00000092470	WDR76	79968	Q9H967	ENSG00000092470_WDR76	4.16139	4.24086	2.22664e-05	0.00726599
ENSG00000260565	CTD-2270P14.1	NA	NA	ENSG00000260565_CTD-2270P14.1	-2.62614	-4.23725	2.26275e-05	0.00726599
ENSG00000167619	TMEM145	284339	NA	ENSG00000167619_TMEM145	-4.80211	-4.22387	2.40143e-05	0.00753995
ENSG00000112218	GPR63	81491	Q9BZJ6	ENSG00000112218_GPR63	4.07278	4.18357	2.86964e-05	0.00791791
ENSG00000121753	ADGRB2	576	A2A3C6	ENSG00000121753_ADGRB2	-1.30289	-4.18677	2.82954e-05	0.00791791
ENSG00000214050	FBXO16	157574	E5RFF8	ENSG00000214050_FBXO16	-2.62806	-4.20366	2.62636e-05	0.00791791
ENSG00000214029	ZNF891	101060200	A8MT65	ENSG00000214029_ZNF891	-2.63962	-4.20047	2.66362e-05	0.00791791
ENSG00000008128	CDK11A	728642	Q5QPR4	ENSG00000008128_CDK11A	-2.72151	-4.18008	2.91409e-05	0.00791791
ENSG00000167280	ENGASE	64772	J3QLG5	ENSG00000167280_ENGASE	-4.13101	-4.19155	2.7705e-05	0.00791791
ENSG00000229124	VIM-AS1	100507347	NA	ENSG00000229124_VIM-AS1	-4.13335	-4.19719	2.70247e-05	0.00791791
ENSG00000104081	BMF	90427	Q96LC9	ENSG00000104081_BMF	-2.14285	-4.15383	3.26962e-05	0.0087163
ENSG00000118181	RPS25	6230	E9PK60	ENSG00000118181_RPS25	-4.09817	-4.14911	3.33765e-05	0.00873291
ENSG00000099385	BCL7C	9274	Q8WUZ0	ENSG00000099385_BCL7C	-4.07773	-4.1413	3.45343e-05	0.00887154
ENSG00000268927	NA	NA	NA	ENSG00000268927_NA	-2.33264	-4.13429	3.56047e-05	0.0089832
ENSG00000166295	ANAPC16	119504	NA	ENSG00000166295_ANAPC16	-4.0662	-4.10802	3.9907e-05	0.00989204
ENSG00000129195	FAM64A	54478	Q9BSJ6	ENSG00000129195_FAM64A	4.00099	4.10331	4.07289e-05	0.0099217
ENSG00000203827	NA	NA	NA	ENSG00000203827_NA	-3.32066	-4.08945	4.32391e-05	0.0103547
ENSG00000166828	SCNN1G	6340	P51170	ENSG00000166828_SCNN1G	4.48638	4.06185	4.86849e-05	0.0112766
ENSG00000169905	TOR1AIP2	163590	Q8NFQ8	ENSG00000169905_TOR1AIP2	-4.00903	-4.0637	4.83001e-05	0.0112766
ENSG00000164638	SLC29A4	222962	C9IYM7	ENSG00000164638_SLC29A4	3.14973	4.04775	5.17114e-05	0.0117843
ENSG00000167363	FN3K	64122	Q9H479	ENSG00000167363_FN3K	-2.92212	-4.03133	5.54621e-05	0.0124385
ENSG00000148677	ANKRD1	27063	Q15327	ENSG00000148677_ANKRD1	-5.65118	-4.0273	5.642e-05	0.0124556
ENSG00000164032	H2AFZ	3015	NA	ENSG00000164032_H2AFZ	3.8988	4.01293	5.9971e-05	0.0130358
ENSG00000163728	TTC14	151613	Q96N46	ENSG00000163728_TTC14	-3.7963	-4.00213	6.27741e-05	0.0134384
ENSG00000100906	NFKBIA	4792	P25963	ENSG00000100906_NFKBIA	3.83055	3.98863	6.64554e-05	0.0140142
ENSG00000127666	TICAM1	148022	Q8IUC6	ENSG00000127666_TICAM1	-3.92625	-3.96216	7.42762e-05	0.0154331
ENSG00000183513	COA5	493753	Q86WW8	ENSG00000183513_COA5	-3.90219	-3.95622	7.61438e-05	0.0155918
ENSG00000257167	TMPO-AS1	100128191	NA	ENSG00000257167_TMPO-AS1	3.91546	3.94833	7.86997e-05	0.015885
ENSG00000272005	NA	NA	NA	ENSG00000272005_NA	-3.28179	-3.91801	8.92814e-05	0.017767
ENSG00000124257	NEURL2	140825	H0YGA6	ENSG00000124257_NEURL2	2.86797	3.90729	9.3336e-05	0.0183159
ENSG00000163155	LYSMD1	388695	Q96S90	ENSG00000163155_LYSMD1	-2.42295	-3.90251	9.51991e-05	0.0184256
ENSG00000178917	ZNF852	285346	Q6ZMS4	ENSG00000178917_ZNF852	-3.49614	-3.88391	0.000102789	0.0196257
ENSG00000099994	SUSD2	56241	Q9UGT4	ENSG00000099994_SUSD2	4.55349	3.87383	0.000107136	0.0200951
ENSG00000251603	RP11-164P12.4	NA	NA	ENSG00000251603_RP11-164P12.4	-2.4185	-3.87167	0.000108092	0.0200951
ENSG00000148634	HERC4	26091	Q5GLZ8	ENSG00000148634_HERC4	-3.82146	-3.86156	0.000112666	0.0206736
ENSG00000254860	TMEM9B-AS1	493900	NA	ENSG00000254860_TMEM9B-AS1	-2.0445	-3.84777	0.000119196	0.0215912
ENSG00000132972	RNF17	56163	Q9BXT8	ENSG00000132972_RNF17	8.56149	3.83883	0.000123623	0.0221097
ENSG00000130545	CRB3	92359	Q9BUF7	ENSG00000130545_CRB3	-3.61746	-3.82842	0.00012897	0.0227778
ENSG00000162896	PIGR	5284	P01833	ENSG00000162896_PIGR	3.91083	3.82029	0.000133297	0.0228901
ENSG00000250697	CTD-2066L21.3	NA	NA	ENSG00000250697_CTD-2066L21.3	-3.14064	-3.82401	0.000131301	0.0228901
ENSG00000161970	RPL26	6154	P61254	ENSG00000161970_RPL26	-3.76754	-3.81517	0.000136087	0.0228901
ENSG00000196476	C20orf96	140680	Q5JYC3	ENSG00000196476_C20orf96	-3.81048	-3.81523	0.000136057	0.0228901
ENSG00000269396	NA	NA	NA	ENSG00000269396_NA	-4.31249	-3.80872	0.000139688	0.0232194
ENSG00000205325	AC005863.1	NA	NA	ENSG00000205325_AC005863.1	-3.80896	-3.79864	0.000145494	0.0239033
ENSG00000144485	HES6	55502	Q96HZ4	ENSG00000144485_HES6	2.82534	3.79215	0.000149349	0.0239493
ENSG00000137745	MMP13	4322	P45452	ENSG00000137745_MMP13	-2.57951	-3.79424	0.000148099	0.0239493
ENSG00000166347	CYB5A	1528	P00167	ENSG00000166347_CYB5A	-3.59926	-3.78965	0.000150859	0.0239493
ENSG00000100441	KHNYN	23351	O15037	ENSG00000100441_KHNYN	-3.74077	-3.78649	0.000152788	0.0239861
ENSG00000257698	RP11-620J15.3	NA	NA	ENSG00000257698_RP11-620J15.3	-2.2857	-3.77634	0.000159147	0.0242302
ENSG00000183072	NKX2-5	1482	P52952	ENSG00000183072_NKX2-5	-2.79944	-3.77581	0.000159488	0.0242302
ENSG00000158286	RNF207	388591	NA	ENSG00000158286_RNF207	-3.72426	-3.77607	0.000159319	0.0242302
ENSG00000213949	ITGA1	3672	P56199	ENSG00000213949_ITGA1	-3.60151	-3.76709	0.00016516	0.0248249
ENSG00000089682	RBM41	55285	Q96IZ5	ENSG00000089682_RBM41	-3.71237	-3.76064	0.00016948	0.0251209
ENSG00000113083	LOX	4015	P28300	ENSG00000113083_LOX	-3.78315	-3.75887	0.000170685	0.0251209
ENSG00000198959	TGM2	7052	P21980	ENSG00000198959_TGM2	-3.67119	-3.74712	0.000178875	0.0260549
ENSG00000198056	PRIM1	5557	F8VSB2	ENSG00000198056_PRIM1	3.63511	3.73836	0.000185227	0.0264935
ENSG00000175536	LIPT2	387787	H0YC96	ENSG00000175536_LIPT2	-2.42105	-3.73527	0.000187511	0.0264935
ENSG00000115128	SF3B6	51639	Q9Y3B4	ENSG00000115128_SF3B6	-3.69276	-3.73735	0.000185967	0.0264935
ENSG00000255893	RP11-685N10.1	NA	NA	ENSG00000255893_RP11-685N10.1	-2.10235	-3.71304	0.000204788	0.028648
ENSG00000147121	KRBOX4	55634	Q5JUW0	ENSG00000147121_KRBOX4	-2.29034	-3.69762	0.000217628	0.0301458
ENSG00000235027	AC068580.6	NA	NA	ENSG00000235027_AC068580.6	-2.31102	-3.6928	0.000221802	0.0304256
ENSG00000234771	SLC25A25-AS1	NA	NA	ENSG00000234771_SLC25A25-AS1	-2.34917	-3.68621	0.000227616	0.030923
ENSG00000113645	WWC1	23286	Q8IX03	ENSG00000113645_WWC1	3.56928	3.68	0.000233232	0.0313841
ENSG00000100162	CENPM	79019	Q9NSP4	ENSG00000100162_CENPM	3.5519	3.67057	0.000242015	0.0322587
ENSG00000227268	KLLN	100144748	B2CW77	ENSG00000227268_KLLN	-3.24596	-3.6496	0.00026265	0.034361
ENSG00000100605	ITPK1	3705	Q13572	ENSG00000100605_ITPK1	-3.6044	-3.65126	0.000260961	0.034361
ENSG00000137960	GIPC2	54810	NA	ENSG00000137960_GIPC2	-1.70086	-3.6425	0.000270001	0.0346804
ENSG00000233396	RP11-458D21.1	NA	NA	ENSG00000233396_RP11-458D21.1	-2.01036	-3.64379	0.000268651	0.0346804
ENSG00000136783	NIPSNAP3A	25934	Q9UFN0	ENSG00000136783_NIPSNAP3A	-3.58663	-3.63834	0.000274399	0.0349278
ENSG00000224260	RP1-272L16.1	NA	NA	ENSG00000224260_RP1-272L16.1	-2.34065	-3.63357	0.000279525	0.0352625
ENSG00000137273	FOXF2	2295	Q12947	ENSG00000137273_FOXF2	-1.93351	-3.62669	0.00028708	0.0355802
ENSG00000132718	SYT11	23208	Q9BT88	ENSG00000132718_SYT11	-2.90519	-3.62841	0.000285167	0.0355802
ENSG00000272977	CTA-390C10.10	NA	NA	ENSG00000272977_CTA-390C10.10	-3.79264	-3.6145	0.000300928	0.0369723
ENSG00000167634	NLRP7	199713	Q8WX94	ENSG00000167634_NLRP7	-3.5726	-3.60449	0.000312768	0.0380957
ENSG00000231389	HLA-DPA1	3113	P20036	ENSG00000231389_HLA-DPA1	-4.20213	-3.5994	0.000318951	0.0385168
ENSG00000235703	LINC00894	NA	NA	ENSG00000235703_LINC00894	-2.10457	-3.58956	0.000331243	0.0396621
ENSG00000173915	USMG5	100302174	Q96IX5	ENSG00000173915_USMG5	-3.53955	-3.58599	0.000335798	0.0398696
ENSG00000168032	ENTPD3	956	O75355	ENSG00000168032_ENTPD3	3.7742	3.57585	0.000349086	0.041102
ENSG00000239264	TXNDC5	81567	NA	ENSG00000239264_TXNDC5	-2.22284	-3.56101	0.000369432	0.0431381
ENSG00000181218	HIST3H2A	92815	Q7L7L0	ENSG00000181218_HIST3H2A	-1.92498	-3.55603	0.000376505	0.0436036
ENSG00000100077	GRK3	157	P35626	ENSG00000100077_GRK3	3.44015	3.54317	0.000395348	0.0454136
ENSG00000065802	ASB1	51665	NA	ENSG00000065802_ASB1	-3.468	-3.52572	0.000422327	0.047583
ENSG00000109618	SEPSECS	51091	Q9HD40	ENSG00000109618_SEPSECS	-3.48256	-3.52447	0.000424337	0.047583
ENSG00000113558	SKP1	6500	P63208	ENSG00000113558_SKP1	-3.48624	-3.52845	0.000417995	0.047583
ENSG00000169629	RGPD8	729540	O14715	ENSG00000169629_RGPD8	-2.39359	-3.52118	0.000429633	0.0477975
ENSG00000213928	IRF9	10379	Q00978	ENSG00000213928_IRF9	-2.18821	-3.5076	0.000452166	0.0499114
