# Supplementary material for: Luminal epithelial cells integrate variable responses to aging into stereotypical changes that underlie breast cancer susceptibility
Source: eLife. 2024 Nov 15;13:e95720. doi: 10.7554/eLife.95720 (PMC11723586; doi:10.7554/eLife.95720)
Supplement: Figure 3—source data 2. — (A–B) Gene set enrichment (fgsea adj. p<0.05) based on age-dependent Old vs. Young DE analysis in (A) LEPs and (B) MEPs. (C–D) Gene set enrichment (fgsea adj. p<0.05) based on age-dependent Old vs. Young DV analysis in (C) LEPs and (D) MEPs. [file elife-95720-fig3-data2.xlsx]

## Sheet: A fgsea DE Old vs Young in LEP
pathway	pval	padj	ES	NES	nMoreExtreme	size	leadingEdge
HALLMARK_MYC_TARGETS_V1	0.00225225	0.00896539	0.590698	2.88108	0	171	ENSG00000084090, ENSG00000048828, ENSG00000169714, ENSG00000055130, ENSG00000135316, ENSG00000142864, ENSG00000164163, ENSG00000173674, ENSG00000120705, ENSG00000154174, ENSG00000127022, ENSG00000148229, ENSG00000173692, ENSG00000136937, ENSG00000134001, ENSG00000187109, ENSG00000099995, ENSG00000171490, ENSG00000153187, ENSG00000125944, ENSG00000162607, ENSG00000101811, ENSG00000116649, ENSG0000…
HALLMARK_E2F_TARGETS	0.00225225	0.00896539	0.58961	2.82853	0	160	ENSG00000135316, ENSG00000074266, ENSG00000176974, ENSG00000124207, ENSG00000118007, ENSG00000134001, ENSG00000187109, ENSG00000145220, ENSG00000162607, ENSG00000167005, ENSG00000253729, ENSG00000170515, ENSG00000100916, ENSG00000136450, ENSG00000128050, ENSG00000075131, ENSG00000166197, ENSG00000108384, ENSG00000143401, ENSG00000205339, ENSG00000143815, ENSG00000144580, ENSG00000102974, ENSG0000…
HALLMARK_MYC_TARGETS_V2	0.002331	0.00896539	0.677775	2.69716	0	54	ENSG00000158050, ENSG00000140263, ENSG00000159399, ENSG00000124383, ENSG00000185238, ENSG00000132603, ENSG00000116649, ENSG00000163811, ENSG00000105447, ENSG00000156502, ENSG00000144381, ENSG00000088205, ENSG00000120800, ENSG00000070814, ENSG00000170515, ENSG00000179115, ENSG00000167085, ENSG00000111641, ENSG00000166197, ENSG00000114767, ENSG00000109084, ENSG00000052749, ENSG00000100297, ENSG0000…
HALLMARK_G2M_CHECKPOINT	0.00225225	0.00896539	0.526529	2.5259	0	160	ENSG00000180818, ENSG00000111371, ENSG00000055130, ENSG00000185129, ENSG00000135316, ENSG00000198900, ENSG00000004897, ENSG00000115053, ENSG00000118007, ENSG00000103257, ENSG00000125148, ENSG00000153187, ENSG00000100084, ENSG00000115758, ENSG00000169136, ENSG00000145907, ENSG00000158169, ENSG00000091436, ENSG00000110713, ENSG00000108424, ENSG00000130826, ENSG00000136450, ENSG00000166197, ENSG0000…
HALLMARK_MTORC1_SIGNALING	0.00225225	0.00896539	0.471812	2.26249	0	159	ENSG00000174437, ENSG00000159167, ENSG00000140263, ENSG00000105835, ENSG00000159399, ENSG00000197170, ENSG00000113013, ENSG00000102393, ENSG00000151012, ENSG00000148700, ENSG00000183527, ENSG00000120742, ENSG00000105281, ENSG00000116750, ENSG00000120705, ENSG00000003056, ENSG00000127022, ENSG00000103257, ENSG00000130204, ENSG00000116133, ENSG00000146731, ENSG00000198805, ENSG00000104825, ENSG0000…
HALLMARK_UNFOLDED_PROTEIN_RESPONSE	0.00223714	0.00896539	0.477728	2.12316	0	100	ENSG00000160691, ENSG00000114867, ENSG00000113013, ENSG00000120742, ENSG00000039123, ENSG00000145740, ENSG00000198301, ENSG00000129128, ENSG00000087269, ENSG00000103257, ENSG00000088247, ENSG00000134001, ENSG00000140694, ENSG00000113300, ENSG00000196305, ENSG00000102580, ENSG00000130826, ENSG00000159720, ENSG00000134109, ENSG00000166197, ENSG00000179409, ENSG00000124783, ENSG00000184575, ENSG0000…
HALLMARK_ESTROGEN_RESPONSE_LATE	0.00225225	0.00896539	0.409485	1.96362	0	159	ENSG00000137699, ENSG00000164070, ENSG00000213853, ENSG00000158747, ENSG00000175793, ENSG00000106484, ENSG00000072210, ENSG00000158050, ENSG00000096060, ENSG00000101773, ENSG00000155380, ENSG00000118515, ENSG00000140263, ENSG00000111319, ENSG00000104267, ENSG00000171903, ENSG00000134352, ENSG00000105974, ENSG00000102393, ENSG00000140284, ENSG00000148700, ENSG00000100605, ENSG00000103257, ENSG0000…
HALLMARK_UV_RESPONSE_UP	0.00223214	0.00896539	0.4019	1.85858	0	119	ENSG00000115457, ENSG00000100664, ENSG00000104267, ENSG00000134352, ENSG00000147955, ENSG00000143819, ENSG00000169684, ENSG00000211445, ENSG00000148229, ENSG00000116096, ENSG00000135966, ENSG00000153187, ENSG00000131979, ENSG00000130741, ENSG00000055118, ENSG00000108179, ENSG00000172270, ENSG00000136943, ENSG00000165732, ENSG00000092445, ENSG00000163902, ENSG00000189221, ENSG00000165916, ENSG0000…
HALLMARK_P53_PATHWAY	0.0022779	0.00896539	0.360678	1.74269	0	165	ENSG00000186350, ENSG00000164070, ENSG00000175793, ENSG00000166619, ENSG00000140961, ENSG00000026103, ENSG00000140945, ENSG00000113070, ENSG00000206075, ENSG00000143819, ENSG00000151012, ENSG00000114738, ENSG00000073282, ENSG00000196313, ENSG00000101000, ENSG00000064115, ENSG00000139687, ENSG00000198000, ENSG00000111424, ENSG00000058262, ENSG00000168003, ENSG00000168564, ENSG00000136159, ENSG0000…
HALLMARK_INTERFERON_ALPHA_RESPONSE	0.0018018	0.00896539	-0.405249	-1.73848	0	83	ENSG00000166710, ENSG00000136514, ENSG00000092010, ENSG00000188313, ENSG00000125347, ENSG00000204264, ENSG00000164136, ENSG00000146859, ENSG00000204525, ENSG00000108679, ENSG00000119922, ENSG00000155363, ENSG00000013374, ENSG00000240065, ENSG00000177409, ENSG00000168310, ENSG00000156587, ENSG00000137628, ENSG00000185507, ENSG00000119917, ENSG00000182179, ENSG00000130589, ENSG00000172183, ENSG0000…
HALLMARK_ALLOGRAFT_REJECTION	0.00178571	0.00896539	-0.361086	-1.66664	0	136	ENSG00000166710, ENSG00000159110, ENSG00000174130, ENSG00000100985, ENSG00000206503, ENSG00000164136, ENSG00000163083, ENSG00000095752, ENSG00000104365, ENSG00000048052, ENSG00000205220, ENSG00000122862, ENSG00000242574, ENSG00000145425, ENSG00000160255, ENSG00000128342, ENSG00000111679, ENSG00000060982, ENSG00000092969, ENSG00000204287, ENSG00000181104, ENSG00000150782, ENSG00000166278, ENSG0000…
HALLMARK_ESTROGEN_RESPONSE_EARLY	0.00223714	0.00896539	0.341813	1.64964	0	163	ENSG00000158747, ENSG00000121057, ENSG00000175793, ENSG00000096060, ENSG00000101773, ENSG00000155380, ENSG00000154153, ENSG00000111319, ENSG00000134352, ENSG00000099204, ENSG00000102393, ENSG00000140284, ENSG00000171346, ENSG00000148700, ENSG00000100605, ENSG00000152661, ENSG00000147394, ENSG00000103257, ENSG00000156299, ENSG00000100867, ENSG00000173227, ENSG00000157600, ENSG00000026508, ENSG0000…
HALLMARK_OXIDATIVE_PHOSPHORYLATION	0.00225225	0.00896539	0.340709	1.63448	0	160	ENSG00000115840, ENSG00000116688, ENSG00000137714, ENSG00000124275, ENSG00000113013, ENSG00000166411, ENSG00000141385, ENSG00000198836, ENSG00000154174, ENSG00000132313, ENSG00000168291, ENSG00000196177, ENSG00000091140, ENSG00000110955, ENSG00000110090, ENSG00000138095, ENSG00000145494, ENSG00000134375, ENSG00000167315, ENSG00000204370, ENSG00000156502, ENSG00000100412, ENSG00000006695, ENSG0000…
HALLMARK_XENOBIOTIC_METABOLISM	0.00892857	0.0318878	0.286201	1.36606	3	152	ENSG00000108602, ENSG00000143149, ENSG00000026103, ENSG00000174437, ENSG00000198848, ENSG00000104267, ENSG00000143819, ENSG00000105281, ENSG00000005469, ENSG00000114850, ENSG00000128989, ENSG00000125148, ENSG00000101577, ENSG00000131979, ENSG00000138356, ENSG00000103876, ENSG00000100412, ENSG00000184500, ENSG00000181019, ENSG00000168306, ENSG00000186115, ENSG00000157557, ENSG00000116704, ENSG0000…
HALLMARK_PROTEIN_SECRETION	0.0111607	0.0331214	0.345315	1.49137	4	85	ENSG00000102393, ENSG00000141367, ENSG00000003056, ENSG00000102805, ENSG00000139921, ENSG00000161203, ENSG00000119396, ENSG00000142168, ENSG00000143401, ENSG00000105971, ENSG00000086827, ENSG00000109572, ENSG00000108433, ENSG00000124209, ENSG00000177189, ENSG00000151914, ENSG00000066777, ENSG00000116521, ENSG00000170348, ENSG00000166747, ENSG00000074695, ENSG00000144674, ENSG00000138768, ENSG0000…
HALLMARK_INTERFERON_GAMMA_RESPONSE	0.0107914	0.0331214	-0.306653	-1.44744	5	157	ENSG00000166710, ENSG00000136514, ENSG00000159110, ENSG00000125826, ENSG00000092010, ENSG00000188313, ENSG00000234745, ENSG00000125347, ENSG00000206503, ENSG00000204264, ENSG00000164136, ENSG00000140464, ENSG00000221963, ENSG00000136816, ENSG00000205220, ENSG00000108679, ENSG00000119922, ENSG00000240065, ENSG00000140853, ENSG00000177409, ENSG00000132530, ENSG00000110848, ENSG00000168310, ENSG0000…
HALLMARK_ADIPOGENESIS	0.0112613	0.0331214	0.285118	1.36779	4	160	ENSG00000122644, ENSG00000119927, ENSG00000166411, ENSG00000165678, ENSG00000211445, ENSG00000105281, ENSG00000173267, ENSG00000091140, ENSG00000065534, ENSG00000213341, ENSG00000177469, ENSG00000167315, ENSG00000103876, ENSG00000109016, ENSG00000141232, ENSG00000100412, ENSG00000138757, ENSG00000069849, ENSG00000248098, ENSG00000142168, ENSG00000183048, ENSG00000171723, ENSG00000133318, ENSG0000…

## Sheet: B fgsea DE Old vs Young in MEP
pathway	pval	padj	ES	NES	nMoreExtreme	size	leadingEdge
HALLMARK_P53_PATHWAY	0.00165289	0.0115314	0.444302	2.03523	0	165	ENSG00000185339, ENSG00000196743, ENSG00000186350, ENSG00000179593, ENSG00000116717, ENSG00000110651, ENSG00000026103, ENSG00000196313, ENSG00000154767, ENSG00000170345, ENSG00000177551, ENSG00000176749, ENSG00000136826, ENSG00000196839, ENSG00000135148, ENSG00000142192, ENSG00000185650, ENSG00000118689, ENSG00000140961, ENSG00000197892, ENSG00000109670, ENSG00000162783, ENSG00000145632, ENSG0000…
HALLMARK_ESTROGEN_RESPONSE_LATE	0.00163132	0.0115314	0.400078	1.82924	0	159	ENSG00000088002, ENSG00000105825, ENSG00000128016, ENSG00000171903, ENSG00000068078, ENSG00000145824, ENSG00000039068, ENSG00000167757, ENSG00000003137, ENSG00000156711, ENSG00000140526, ENSG00000105379, ENSG00000165731, ENSG00000170345, ENSG00000136826, ENSG00000096060, ENSG00000171401, ENSG00000198722, ENSG00000118515, ENSG00000104522, ENSG00000182054, ENSG00000117308, ENSG00000140263, ENSG0000…
HALLMARK_KRAS_SIGNALING_DN	0.00169205	0.0115314	0.401611	1.78862	0	132	ENSG00000089250, ENSG00000081277, ENSG00000068078, ENSG00000092295, ENSG00000091536, ENSG00000197632, ENSG00000156284, ENSG00000127129, ENSG00000078401, ENSG00000186081, ENSG00000100033, ENSG00000171401, ENSG00000170412, ENSG00000204174, ENSG00000127415, ENSG00000118515, ENSG00000181690, ENSG00000133863, ENSG00000250722, ENSG00000243566, ENSG00000135960, ENSG00000100146, ENSG00000184602, ENSG0000…
HALLMARK_INTERFERON_ALPHA_RESPONSE	0.00184502	0.0115314	0.420895	1.74037	0	83	ENSG00000120690, ENSG00000059378, ENSG00000173193, ENSG00000133106, ENSG00000234127, ENSG00000188404, ENSG00000137200, ENSG00000135148, ENSG00000078081, ENSG00000138496, ENSG00000196116, ENSG00000138642, ENSG00000108771, ENSG00000187608, ENSG00000101000, ENSG00000182179, ENSG00000137628, ENSG00000185201, ENSG00000196776, ENSG00000142089, ENSG00000108679, ENSG00000177409, ENSG00000164136, ENSG0000…
HALLMARK_APOPTOSIS	0.00175131	0.0115314	0.379626	1.66044	0	121	ENSG00000211445, ENSG00000135828, ENSG00000116717, ENSG00000131981, ENSG00000160789, ENSG00000026103, ENSG00000142192, ENSG00000150782, ENSG00000101224, ENSG00000170458, ENSG00000100290, ENSG00000141736, ENSG00000087274, ENSG00000083799, ENSG00000185825, ENSG00000042445, ENSG00000065361, ENSG00000167779, ENSG00000118971, ENSG00000003402, ENSG00000166483, ENSG00000148180, ENSG00000121858, ENSG0000…
HALLMARK_APICAL_JUNCTION	0.00165837	0.0115314	0.360412	1.64536	0	163	ENSG00000143537, ENSG00000165025, ENSG00000039068, ENSG00000074211, ENSG00000179593, ENSG00000156453, ENSG00000156711, ENSG00000156284, ENSG00000197702, ENSG00000103496, ENSG00000081237, ENSG00000137103, ENSG00000035403, ENSG00000143217, ENSG00000129675, ENSG00000204539, ENSG00000134762, ENSG00000062038, ENSG00000105409, ENSG00000131558, ENSG00000198561, ENSG00000160691, ENSG00000181885, ENSG0000…
HALLMARK_MITOTIC_SPINDLE	0.00167785	0.0115314	0.362946	1.64419	0	152	ENSG00000196914, ENSG00000173848, ENSG00000151914, ENSG00000198087, ENSG00000128283, ENSG00000017797, ENSG00000136861, ENSG00000173327, ENSG00000035403, ENSG00000170776, ENSG00000092820, ENSG00000100503, ENSG00000197102, ENSG00000129116, ENSG00000154556, ENSG00000079482, ENSG00000264364, ENSG00000130479, ENSG00000136754, ENSG00000101639, ENSG00000132694, ENSG00000179604, ENSG00000131899, ENSG0000…
HALLMARK_INTERFERON_GAMMA_RESPONSE	0.00164745	0.0115314	0.350782	1.60367	0	157	ENSG00000026751, ENSG00000127951, ENSG00000137275, ENSG00000013364, ENSG00000183347, ENSG00000196396, ENSG00000059378, ENSG00000026103, ENSG00000173193, ENSG00000140464, ENSG00000073756, ENSG00000133106, ENSG00000234127, ENSG00000137200, ENSG00000135148, ENSG00000128604, ENSG00000118503, ENSG00000124201, ENSG00000137193, ENSG00000116711, ENSG00000196116, ENSG00000138642, ENSG00000108771, ENSG0000…
HALLMARK_MYC_TARGETS_V1	0.00251889	0.0127226	-0.454018	-2.18007	0	171	ENSG00000196591, ENSG00000188846, ENSG00000100902, ENSG00000100632, ENSG00000155959, ENSG00000125870, ENSG00000165672, ENSG00000100519, ENSG00000123131, ENSG00000115541, ENSG00000239672, ENSG00000106588, ENSG00000149273, ENSG00000141759, ENSG00000124614, ENSG00000181163, ENSG00000129084, ENSG00000106028, ENSG00000167085, ENSG00000126261, ENSG00000204392, ENSG00000110958, ENSG00000143977, ENSG0000…
HALLMARK_E2F_TARGETS	0.00254453	0.0127226	-0.341635	-1.62318	0	160	ENSG00000183011, ENSG00000123131, ENSG00000239672, ENSG00000111875, ENSG00000136982, ENSG00000111276, ENSG00000123080, ENSG00000179958, ENSG00000065911, ENSG00000115350, ENSG00000213347, ENSG00000103540, ENSG00000108848, ENSG00000143815, ENSG00000123975, ENSG00000164109, ENSG00000135446, ENSG00000115942, ENSG00000077152, ENSG00000111247, ENSG00000136270, ENSG00000164032, ENSG00000128050, ENSG0000…
HALLMARK_COMPLEMENT	0.00332779	0.0151263	0.343662	1.56775	1	156	ENSG00000100600, ENSG00000163131, ENSG00000198734, ENSG00000135678, ENSG00000105825, ENSG00000131981, ENSG00000123384, ENSG00000135047, ENSG00000197632, ENSG00000110851, ENSG00000178226, ENSG00000103496, ENSG00000176749, ENSG00000167748, ENSG00000118503, ENSG00000131381, ENSG00000125730, ENSG00000197635, ENSG00000137193, ENSG00000108039, ENSG00000116711, ENSG00000102780, ENSG00000138166, ENSG0000…
HALLMARK_HEME_METABOLISM	0.00666667	0.0277778	0.337661	1.52379	3	146	ENSG00000196914, ENSG00000119711, ENSG00000159346, ENSG00000102575, ENSG00000143416, ENSG00000109854, ENSG00000076864, ENSG00000143061, ENSG00000121691, ENSG00000137575, ENSG00000118689, ENSG00000135363, ENSG00000109787, ENSG00000100897, ENSG00000125730, ENSG00000118777, ENSG00000065970, ENSG00000143797, ENSG00000153113, ENSG00000007968, ENSG00000087274, ENSG00000179262, ENSG00000082641, ENSG0000…
HALLMARK_PEROXISOME	0.00739372	0.0284374	0.385391	1.59182	3	81	ENSG00000088002, ENSG00000143320, ENSG00000013364, ENSG00000070756, ENSG00000151726, ENSG00000102910, ENSG00000121691, ENSG00000182054, ENSG00000099377, ENSG00000116133, ENSG00000042445, ENSG00000104823, ENSG00000101846, ENSG00000117305, ENSG00000124587, ENSG00000213965, ENSG00000170835, ENSG00000197448, ENSG00000060971, ENSG00000100300, ENSG00000161533, ENSG00000143149, ENSG00000133835, ENSG0000…
HALLMARK_OXIDATIVE_PHOSPHORYLATION	0.0101781	0.0363504	-0.294877	-1.40102	3	160	ENSG00000138495, ENSG00000109390, ENSG00000065154, ENSG00000166260, ENSG00000165672, ENSG00000167283, ENSG00000165264, ENSG00000173660, ENSG00000183648, ENSG00000139180, ENSG00000159199, ENSG00000134809, ENSG00000110435, ENSG00000109519, ENSG00000189043, ENSG00000172115, ENSG00000099795, ENSG00000166347, ENSG00000134375, ENSG00000151366, ENSG00000164258, ENSG00000112695, ENSG00000120662, ENSG0000…
HALLMARK_IL6_JAK_STAT3_SIGNALING	0.0127971	0.0426569	0.402271	1.55709	6	59	ENSG00000107968, ENSG00000137462, ENSG00000196396, ENSG00000026103, ENSG00000146072, ENSG00000135503, ENSG00000170458, ENSG00000137193, ENSG00000131724, ENSG00000243646, ENSG00000026508, ENSG00000067182, ENSG00000184557, ENSG00000125347, ENSG00000104432, ENSG00000185338, ENSG00000135218, ENSG00000030110, ENSG00000134460, ENSG00000108688, ENSG00000141506, ENSG00000077238, ENSG00000177885, ENSG0000…
HALLMARK_MYC_TARGETS_V2	0.0152505	0.0448545	-0.388584	-1.53657	6	54	ENSG00000174669, ENSG00000115541, ENSG00000179958, ENSG00000181163, ENSG00000167085, ENSG00000120158, ENSG00000123545, ENSG00000158050, ENSG00000136933, ENSG00000162851, ENSG00000106305, ENSG00000144381, ENSG00000135446, ENSG00000136718, ENSG00000136270
HALLMARK_ESTROGEN_RESPONSE_EARLY	0.0149254	0.0448545	0.306781	1.40052	8	163	ENSG00000147394, ENSG00000157600, ENSG00000120690, ENSG00000185499, ENSG00000088002, ENSG00000160190, ENSG00000114315, ENSG00000003137, ENSG00000140526, ENSG00000165731, ENSG00000170345, ENSG00000136826, ENSG00000096060, ENSG00000171401, ENSG00000163435, ENSG00000160183, ENSG00000181885, ENSG00000163083, ENSG00000096968, ENSG00000171345, ENSG00000099204, ENSG00000123066, ENSG00000026508, ENSG0000…
HALLMARK_PROTEIN_SECRETION	0.0182482	0.0461409	0.362955	1.51183	9	85	ENSG00000151914, ENSG00000163399, ENSG00000006125, ENSG00000124209, ENSG00000105402, ENSG00000205302, ENSG00000102805, ENSG00000049245, ENSG00000054983, ENSG00000107862, ENSG00000132842, ENSG00000138674, ENSG00000079950, ENSG00000124198, ENSG00000144674, ENSG00000165240, ENSG00000122126, ENSG00000135775, ENSG00000144566, ENSG00000134265, ENSG00000141367, ENSG00000047249, ENSG00000170348, ENSG0000…
HALLMARK_TNFA_SIGNALING_VIA_NFKB	0.0184564	0.0461409	0.313542	1.42038	10	152	ENSG00000107968, ENSG00000128016, ENSG00000137462, ENSG00000116717, ENSG00000059804, ENSG00000114315, ENSG00000197632, ENSG00000171522, ENSG00000126561, ENSG00000078401, ENSG00000170345, ENSG00000073756, ENSG00000136826, ENSG00000150782, ENSG00000118515, ENSG00000118503, ENSG00000162783, ENSG00000145632, ENSG00000120129, ENSG00000138166, ENSG00000162407, ENSG00000184602, ENSG00000003402, ENSG0000…
HALLMARK_EPITHELIAL_MESENCHYMAL_TRANSITION	0.0173697	0.0461409	-0.29918	-1.41202	6	147	ENSG00000060718, ENSG00000198959, ENSG00000163359, ENSG00000109099, ENSG00000187498, ENSG00000152377, ENSG00000163710, ENSG00000164692, ENSG00000166147, ENSG00000166794, ENSG00000113083, ENSG00000124225, ENSG00000164932, ENSG00000154096, ENSG00000115414, ENSG00000118785, ENSG00000101825, ENSG00000139278, ENSG00000106333, ENSG00000134871, ENSG00000166923, ENSG00000182667, ENSG00000108821, ENSG0000…

## Sheet: C fgsea DV Old vs Young in LEP
pathway	pval	padj	ES	NES	nMoreExtreme	size	leadingEdge
HALLMARK_E2F_TARGETS	0.00141844	0.0391236	0.429531	1.84952	0	160	ENSG00000189159, ENSG00000083642, ENSG00000074266, ENSG00000166483, ENSG00000143815, ENSG00000156136, ENSG00000120699, ENSG00000049541, ENSG00000111247, ENSG00000076382, ENSG00000101224, ENSG00000162607, ENSG00000161547, ENSG00000072501, ENSG00000130816, ENSG00000164985, ENSG00000143401, ENSG00000138376, ENSG00000100162, ENSG00000119969, ENSG00000176974, ENSG00000065911, ENSG00000076242, ENSG0000…
HALLMARK_INFLAMMATORY_RESPONSE	0.00156495	0.0391236	0.392639	1.60837	0	112	ENSG00000254087, ENSG00000174125, ENSG00000169403, ENSG00000141506, ENSG00000080815, ENSG00000171860, ENSG00000104312, ENSG00000064989, ENSG00000170961, ENSG00000070961, ENSG00000162493, ENSG00000167601, ENSG00000135503, ENSG00000078081, ENSG00000134070, ENSG00000160932, ENSG00000164136, ENSG00000198121, ENSG00000164342, ENSG00000184588, ENSG00000145623, ENSG00000085117, ENSG00000132155, ENSG0000…
HALLMARK_ANDROGEN_RESPONSE	0.00316957	0.0396197	0.436813	1.708	1	80	ENSG00000184012, ENSG00000103942, ENSG00000184254, ENSG00000072110, ENSG00000198833, ENSG00000168118, ENSG00000120899, ENSG00000116133, ENSG00000131016, ENSG00000183726, ENSG00000076554, ENSG00000123983, ENSG00000096060, ENSG00000013375, ENSG00000154122, ENSG00000135525, ENSG00000067113, ENSG00000167034, ENSG00000205189, ENSG00000118515, ENSG00000166710, ENSG00000198648, ENSG00000099194, ENSG0000…
HALLMARK_INTERFERON_GAMMA_RESPONSE	0.00293255	0.0396197	0.367328	1.55356	1	143	ENSG00000118640, ENSG00000170439, ENSG00000159110, ENSG00000115267, ENSG00000206503, ENSG00000135148, ENSG00000134326, ENSG00000118503, ENSG00000137628, ENSG00000139626, ENSG00000104312, ENSG00000184557, ENSG00000137752, ENSG00000160932, ENSG00000164136, ENSG00000196116, ENSG00000116711, ENSG00000184588, ENSG00000106785, ENSG00000205220, ENSG00000135899, ENSG00000197329, ENSG00000026751, ENSG0000…
HALLMARK_INTERFERON_ALPHA_RESPONSE	0.00468019	0.0468019	0.401242	1.57314	2	81	ENSG00000115267, ENSG00000135148, ENSG00000134326, ENSG00000137628, ENSG00000182179, ENSG00000104312, ENSG00000137752, ENSG00000078081, ENSG00000160932, ENSG00000164136, ENSG00000196116, ENSG00000106785, ENSG00000101000, ENSG00000135899, ENSG00000138496, ENSG00000173786, ENSG00000120690, ENSG00000139679, ENSG00000157601, ENSG00000166710, ENSG00000138035, ENSG00000137965, ENSG00000134321, ENSG0000…

## Sheet: D fgsea DV Old vs Young in MEP
pathway	pval	padj	ES	NES	nMoreExtreme	size	leadingEdge
HALLMARK_E2F_TARGETS	0.0034965	0.0289598	0.616103	2.87133	0	160	ENSG00000164032, ENSG00000100162, ENSG00000123975, ENSG00000152253, ENSG00000120802, ENSG00000164109, ENSG00000132646, ENSG00000105011, ENSG00000012963, ENSG00000113368, ENSG00000156136, ENSG00000076003, ENSG00000111247, ENSG00000156802, ENSG00000112118, ENSG00000166508, ENSG00000073111, ENSG00000123136, ENSG00000124207, ENSG00000014138, ENSG00000013810, ENSG00000087586, ENSG00000133119, ENSG0000…
HALLMARK_G2M_CHECKPOINT	0.0034965	0.0289598	0.539738	2.51544	0	160	ENSG00000164032, ENSG00000123975, ENSG00000105968, ENSG00000120802, ENSG00000115163, ENSG00000164109, ENSG00000112029, ENSG00000131153, ENSG00000113368, ENSG00000198901, ENSG00000076003, ENSG00000112118, ENSG00000073111, ENSG00000186625, ENSG00000168393, ENSG00000123136, ENSG00000014138, ENSG00000013810, ENSG00000087586, ENSG00000175063, ENSG00000006634, ENSG00000100526, ENSG00000082898, ENSG0000…
HALLMARK_MYC_TARGETS_V2	0.0026455	0.0289598	0.633546	2.46561	0	54	ENSG00000100297, ENSG00000185238, ENSG00000158050, ENSG00000144381, ENSG00000088205, ENSG00000109084, ENSG00000196497, ENSG00000181163, ENSG00000163938, ENSG00000170515, ENSG00000114767, ENSG00000166197, ENSG00000123545, ENSG00000174669, ENSG00000136718, ENSG00000112578, ENSG00000162851, ENSG00000136270, ENSG00000132603, ENSG00000133316, ENSG00000136997, ENSG00000163811, ENSG00000001497, ENSG0000…
HALLMARK_MYC_TARGETS_V1	0.0035461	0.0289598	0.380069	1.79763	0	171	ENSG00000164032, ENSG00000164109, ENSG00000132646, ENSG00000076003, ENSG00000166508, ENSG00000073111, ENSG00000123374, ENSG00000163918, ENSG00000150753, ENSG00000082898, ENSG00000164163, ENSG00000100519, ENSG00000100297, ENSG00000136527, ENSG00000126261, ENSG00000124795, ENSG00000154473, ENSG00000144381, ENSG00000136450, ENSG00000101811, ENSG00000088205, ENSG00000120438, ENSG00000155959, ENSG0000…
HALLMARK_DNA_REPAIR	0.00325733	0.0289598	0.326789	1.49744	0	133	ENSG00000198056, ENSG00000111445, ENSG00000051180, ENSG00000132646, ENSG00000168061, ENSG00000014138, ENSG00000163918, ENSG00000133119, ENSG00000049541, ENSG00000115350, ENSG00000167005, ENSG00000187244, ENSG00000149136, ENSG00000077514, ENSG00000165704, ENSG00000183431, ENSG00000172409, ENSG00000104221, ENSG00000185825, ENSG00000111358, ENSG00000168496, ENSG00000144231, ENSG00000101868, ENSG0000…
HALLMARK_TNFA_SIGNALING_VIA_NFKB	0.0033557	0.0289598	0.321028	1.48988	0	145	ENSG00000100906, ENSG00000163874, ENSG00000164400, ENSG00000114315, ENSG00000105835, ENSG00000136048, ENSG00000078401, ENSG00000136826, ENSG00000169248, ENSG00000109320, ENSG00000177606, ENSG00000081041, ENSG00000154640, ENSG00000158050, ENSG00000113070, ENSG00000169242, ENSG00000122641, ENSG00000205189, ENSG00000166949, ENSG00000137462, ENSG00000116717, ENSG00000059804, ENSG00000026508, ENSG0000…
HALLMARK_EPITHELIAL_MESENCHYMAL_TRANSITION	0.00675676	0.0472973	0.312728	1.44824	1	144	ENSG00000166508, ENSG00000100234, ENSG00000116260, ENSG00000065534, ENSG00000115457, ENSG00000145147, ENSG00000111674, ENSG00000006016, ENSG00000150093, ENSG00000132031, ENSG00000177606, ENSG00000130821, ENSG00000182492, ENSG00000179163, ENSG00000078098, ENSG00000122641, ENSG00000105825, ENSG00000140937, ENSG00000132561, ENSG00000122176, ENSG00000116717, ENSG00000171812, ENSG00000026508, ENSG0000…
