# Supplementary material for: Luminal epithelial cells integrate variable responses to aging into stereotypical changes that underlie breast cancer susceptibility
Source: eLife. 2024 Nov 15;13:e95720. doi: 10.7554/eLife.95720 (PMC11723586; doi:10.7554/eLife.95720)
Supplement: Figure 5—source data 1. — (A) Age-dependent Old vs. Young DE in bulk normal primary breast tissue (adj. p<0.05; nominally significant, unadj. p<0.05; (+) lfc higher in old, (-) lfc higher in young). [file elife-95720-fig5-data1.xlsx]

## Sheet: A DE Old vs Young Tissue
GeneSYM	logFC	AveExpr	t	P.Value	adj.P.Val	B
CCL13	0.738287	5.04025	5.13904	1.13977e-06	0.00960822	5.06957
MS4A6E	0.467601	2.69886	5.28934	5.91712e-07	0.00960822	5.64609
RORB	0.41746	3.78219	5.32571	5.04133e-07	0.00960822	5.78702
RP11-733O18.1	0.266449	4.15897	5.20129	8.69871e-07	0.00960822	5.30717
NALCN	-0.702408	4.94512	-5.01925	1.90723e-06	0.0128624	4.61713
RAP2B	0.365901	6.47942	4.94072	2.66274e-06	0.0149646	4.32405
HIST1H4E	-0.702561	9.20086	-4.84031	4.0614e-06	0.0195644	3.9535
GABRB2	0.360626	4.42664	4.77935	5.2349e-06	0.0220651	3.73085
MVP	0.386813	7.12859	4.71628	6.79322e-06	0.0229022	3.5024
CDCA7L	-0.749891	6.69153	-4.69313	7.47107e-06	0.0229022	3.41904
SPHKAP	-0.787599	5.18992	-4.71106	6.9408e-06	0.0229022	3.48356
C12orf5	0.463748	4.69443	4.61964	1.00858e-05	0.0261611	3.15616
NOB1	-0.553736	8.56396	-4.63004	9.6681e-06	0.0261611	3.1932
CCL19	0.592855	6.5241	4.5833	1.16866e-05	0.0276203	3.02719
MAGI1	-0.467614	5.94706	-4.57091	1.22866e-05	0.0276203	2.98337
IL22RA2	-0.996797	4.06184	-4.54157	1.38285e-05	0.0291436	2.87991
RPL36A	-0.263805	4.30689	-4.48668	1.723e-05	0.0341762	2.68755
RPS15A	-0.423524	10.2241	-4.4531	1.96945e-05	0.0368943	2.57068
MARCO	0.605052	6.34564	4.42844	2.17177e-05	0.0385432	2.48522
C2	0.526357	6.27684	4.41497	2.29064e-05	0.0386201	2.43866
PDE9A	-0.256739	6.26514	-4.3772	2.65824e-05	0.0387057	2.30866
SATB1	-0.271012	6.1331	-4.38318	2.59649e-05	0.0387057	2.32918
RPS7	-0.326837	5.24412	-4.36811	2.75485e-05	0.0387057	2.27748
MAP2K6	-0.938174	6.34231	-4.36826	2.75317e-05	0.0387057	2.27802
PRG4	2.81487	6.37712	4.33125	3.18243e-05	0.0392284	2.15154
CYP2A6	0.475962	4.68377	4.31628	3.37373e-05	0.0392284	2.1006
LRP1B	0.347772	3.35082	4.32607	3.24734e-05	0.0392284	2.13392
IMPDH2	-0.552201	7.06024	-4.33186	3.1748e-05	0.0392284	2.15363
RELN	-1.1601	6.45921	-4.31816	3.34912e-05	0.0392284	2.10699
FUT4	-0.261038	5.07741	-4.3009	3.58167e-05	0.0394702	2.04842
TET1	-0.355514	6.65031	-4.29755	3.62863e-05	0.0394702	2.03706
NOX4	1.1885	5.17514	4.27383	3.97814e-05	0.0406493	1.95686
COBL	-0.782028	7.00384	-4.28077	3.87262e-05	0.0406493	1.9803
PTGFR	0.528519	5.06715	4.25151	4.33654e-05	0.0423029	1.88165
LOC652276	-0.209051	6.72437	-4.22899	4.72936e-05	0.0423029	1.80607
RPS24	-0.313179	7.19986	-4.24369	4.46917e-05	0.0423029	1.85539
AC074183.4	-0.397506	7.68465	-4.23694	4.58696e-05	0.0423029	1.83271
HIST1H4L	-0.437193	4.65288	-4.22473	4.80748e-05	0.0423029	1.79179
PADI2	-1.26033	7.69875	-4.22015	4.89268e-05	0.0423029	1.77649
RPS6	-0.412504	6.46099	-4.2127	5.0347e-05	0.0424425	1.75155
TM4SF19	0.339752	4.62959	4.19758	5.33477e-05	0.0438753	1.70112
LRRC1	-0.373964	5.26459	-4.18223	5.65723e-05	0.0454195	1.65001
RPS18	-0.187457	7.02494	-4.14965	6.40425e-05	0.0469675	1.54204
B3GALT5	-0.581472	5.22714	-4.15578	6.25678e-05	0.0469675	1.56231
CSRNP3	-0.887093	4.88357	-4.14953	6.4072e-05	0.0469675	1.54163
FAM196B	-1.23447	6.50911	-4.15209	6.34511e-05	0.0469675	1.55011
ECM1	0.458805	6.21416	4.1107	7.42189e-05	0.0472201	1.41372
KCNMB2	-0.20675	3.85954	-4.1258	7.0102e-05	0.0472201	1.46337
RPL23A	-0.372028	6.47404	-4.12984	6.90388e-05	0.0472201	1.47666
PCMTD2	-0.390811	8.03477	-4.13762	6.70342e-05	0.0472201	1.5023
FIRRE	-0.428876	5.29401	-4.11417	7.32528e-05	0.0472201	1.42512
RPS21	-0.448916	8.32238	-4.11314	7.35376e-05	0.0472201	1.42174
C21orf88	-0.501665	5.32427	-4.13612	6.74145e-05	0.0472201	1.49738
DLK1	-0.690648	6.76384	-4.09154	7.97761e-05	0.0498158	1.35093
EMP3	0.801049	8.44172	3.95112	0.00013451	0.0498338	0.897243
SNCG	0.458525	6.62761	4.06364	8.85878e-05	0.0498338	1.25985
LILRB2	0.313115	5.65197	4.00306	0.000111029	0.0498338	1.06371
COL10A1	0.309696	3.10003	4.03234	9.95772e-05	0.0498338	1.15825
HABP4	0.307043	6.95475	3.99452	0.000114601	0.0498338	1.03623
HCK	0.28182	6.17859	3.95618	0.000132032	0.0498338	0.913373
CSF2RB	0.276318	6.42626	3.98403	0.000119137	0.0498338	1.00254
CTSL3P	0.233922	5.2259	3.93959	0.00014033	0.0498338	0.860513
SH2D4A	0.224022	5.83497	4.00683	0.000109487	0.0498338	1.07586
RTN1	0.195165	6.10678	3.95873	0.000130799	0.0498338	0.921509
MSH6	-0.14596	5.46782	-3.93459	0.000142932	0.0498338	0.844582
DNMT3A	-0.185354	6.58226	-3.97816	0.00012175	0.0498338	0.983708
VGLL4	-0.192188	7.09235	-3.94889	0.000135619	0.0498338	0.890123
WDR59	-0.242466	6.87327	-3.98155	0.000120236	0.0498338	0.994569
POLR1E	-0.271094	6.21203	-3.9618	0.000129324	0.0498338	0.931345
RPAIN	-0.274886	6.6998	-4.02683	0.000101644	0.0498338	1.1404
ADSL	-0.275393	6.696	-4.02271	0.000103213	0.0498338	1.1271
RPL11	-0.297609	7.26928	-3.962	0.00012923	0.0498338	0.931977
FARP1	-0.323521	5.77593	-4.05471	9.15985e-05	0.0498338	1.23081
RPS10	-0.351083	8.5818	-4.06363	8.85899e-05	0.0498338	1.25983
MBTD1	-0.369362	6.61604	-4.0477	9.40296e-05	0.0498338	1.20805
RPS8	-0.371279	7.47027	-3.97148	0.000124791	0.0498338	0.962305
PKP4	-0.37211	7.53576	-4.03231	9.95896e-05	0.0498338	1.15814
RPS9	-0.399704	9.15686	-3.94634	0.000136898	0.0498338	0.881981
UCK2	-0.40021	6.60392	-3.96001	0.000130182	0.0498338	0.925611
EIF3D	-0.40473	7.86521	-4.00487	0.000110286	0.0498338	1.06954
SNHG7	-0.429107	7.78012	-3.93532	0.000142547	0.0498338	0.84692
RPL10A	-0.46644	9.23967	-4.06715	8.74284e-05	0.0498338	1.2713
TGFA	-0.50646	6.3612	-3.93378	0.000143353	0.0498338	0.842028
RPS2	-0.530531	10.1574	-4.00695	0.00010944	0.0498338	1.07623
ALDH7A1	-0.612523	7.62053	-4.05311	9.21462e-05	0.0498338	1.22563
LOC100289473	-0.630893	5.33606	-4.0045	0.000110441	0.0498338	1.06833
LOC101927870	-0.636033	4.28174	-3.97391	0.000123677	0.0498338	0.970082
KCNN4	-0.742295	7.12281	-3.94	0.00014012	0.0498338	0.861808
SLCO1A2	-0.756084	3.62728	-3.93617	0.000142106	0.0498338	0.849604
CHKA	-0.788326	7.01771	-4.00817	0.000108944	0.0498338	1.08018
HIST1H3I	-0.82719	6.32495	-3.94574	0.000137199	0.0498338	0.880075
PHLDA1	-0.837785	7.79623	-3.96654	0.000127087	0.0498338	0.946482
PLCH1	-0.873659	4.93159	-4.07135	8.60636e-05	0.0498338	1.28498
SNORA71C	-0.874528	8.03071	-3.96723	0.000126763	0.0498338	0.948701
CRABP1	-0.92553	6.83039	-3.96872	0.000126067	0.0498338	0.953474
CAPN6	-1.04462	5.6722	-4.06227	8.90423e-05	0.0498338	1.2554
PIGR	-1.87876	9.22926	-3.94747	0.000136327	0.0498338	0.885605
MMP16	-0.926175	6.1142	-3.92914	0.000145811	0.050171	0.82729
LEPR	0.599728	7.91733	3.92085	0.000150305	0.0511948	0.800977
ZNF236	-0.160903	6.30415	-3.91085	0.000155902	0.0525701	0.769292
RPS19	-0.665579	9.72414	-3.90807	0.000157496	0.0525818	0.760476
RPL32	-0.300841	6.60287	-3.89052	0.000167901	0.0539203	0.705045
EEF1B2	-0.42291	7.8635	-3.89496	0.000165206	0.0539203	0.719067
KRTAP21-1	-0.706164	3.76956	-3.89139	0.000167367	0.0539203	0.707806
SNORA71A	-1.11391	8.86332	-3.89461	0.000165417	0.0539203	0.717961
CYP4Z1	1.19654	5.44072	3.88286	0.000172644	0.0544072	0.680916
LINC01235	-0.633066	6.32569	-3.88336	0.00017233	0.0544072	0.682495
MASP1	0.513833	5.60536	3.86098	0.000186905	0.0546901	0.612188
ADAMTS3	0.453329	4.5575	3.84522	0.00019787	0.0546901	0.562842
TUBB2A	0.426648	7.15344	3.87025	0.000180734	0.0546901	0.641258
EPB42	0.372184	5.13483	3.84672	0.000196799	0.0546901	0.567543
TMEM173	0.278116	6.74363	3.86857	0.00018184	0.0546901	0.635976
APOL1	0.265404	6.67895	3.84562	0.000197586	0.0546901	0.564089
SYNC	0.257357	6.38997	3.8586	0.000188523	0.0546901	0.60473
FAM219A	0.20308	6.12574	3.85348	0.00019205	0.0546901	0.588686
CDK19	-0.165425	5.80874	-3.85241	0.000192792	0.0546901	0.585344
SNX30	-0.2469	6.589	-3.84557	0.000197618	0.0546901	0.563949
STOX2	-0.348662	5.6211	-3.85123	0.000193622	0.0546901	0.581626
HAPLN3	-0.438192	6.76424	-3.84758	0.000196192	0.0546901	0.570214
CCNB1IP1	-0.481099	6.62825	-3.86544	0.000183913	0.0546901	0.626162
SLC13A2	-0.602685	6.3399	-3.84821	0.000195742	0.0546901	0.572203
DCX	-0.725375	4.89427	-3.85789	0.000189012	0.0546901	0.602488
ELF5	-2.02844	8.70405	-3.84186	0.000200288	0.0549082	0.552333
IGFBP6	0.699377	7.70463	3.81225	0.000222813	0.0574123	0.460134
CCDC152	0.405242	4.23133	3.81178	0.000223195	0.0574123	0.458652
SETDB1	-0.243369	6.07359	-3.82607	0.000212017	0.0574123	0.503092
GPHN	-0.268467	6.17184	-3.81498	0.000220641	0.0574123	0.468608
RPL7	-0.319495	8.88879	-3.81253	0.000222591	0.0574123	0.460996
FZD10	-0.352449	5.03573	-3.816	0.000219831	0.0574123	0.471786
PARD3	-0.376658	7.30154	-3.80985	0.000224746	0.0574123	0.452665
NOA1	-0.537455	7.76653	-3.80996	0.000224654	0.0574123	0.45302
ATP13A4	-1.11866	5.4451	-3.81044	0.00022427	0.0574123	0.454499
S100A11	0.279247	9.02019	3.79974	0.00023304	0.0575205	0.421329
YEATS2	-0.235216	6.50139	-3.79968	0.000233094	0.0575205	0.421128
EEF1G	-0.407402	11.718	-3.80632	0.000227605	0.0575205	0.441734
RPS3	-0.428708	9.39693	-3.79895	0.000233698	0.0575205	0.41889
LAMA1	-0.581568	5.41667	-3.79936	0.000233358	0.0575205	0.420151
QARS	-0.34499	8.14408	-3.7876	0.000243387	0.0582058	0.383775
RPL12	-0.372281	10.0839	-3.78886	0.000242291	0.0582058	0.387677
RPS2P7	-0.485671	11.412	-3.78915	0.000242045	0.0582058	0.388556
LOC284578	-0.633166	4.10885	-3.78784	0.000243179	0.0582058	0.384515
GARNL3	-0.181035	5.71167	-3.78023	0.000249883	0.0593384	0.361011
PTGIS	1.00484	8.33522	3.75688	0.00027156	0.0601348	0.289138
LGI2	0.481508	4.9575	3.77192	0.000257407	0.0601348	0.335377
HAVCR2	0.36325	4.93093	3.76838	0.000260674	0.0601348	0.32448
PLEKHA8P1	0.254977	6.32122	3.7535	0.000274847	0.0601348	0.278746
ARRB2	0.254	7.47322	3.76973	0.000259417	0.0601348	0.328657
GGA2	-0.227714	5.52977	-3.76991	0.000259254	0.0601348	0.329198
RPL38	-0.253288	7.2531	-3.75008	0.000278204	0.0601348	0.268261
NOS1AP	-0.25745	6.23087	-3.755	0.000273379	0.0601348	0.28337
RANBP17	-0.290204	4.52306	-3.75057	0.000277716	0.0601348	0.269776
GNB2L1	-0.319784	7.35141	-3.75391	0.000274448	0.0601348	0.280001
SNORD49A	-0.362674	5.91218	-3.75695	0.000271496	0.0601348	0.28934
RP11-430C7.5	-0.428077	4.27603	-3.76624	0.000262667	0.0601348	0.3179
GOLGA8A	-0.606114	7.87829	-3.75875	0.000269757	0.0601348	0.294892
TFAP2C	-0.735585	7.22692	-3.75048	0.000277811	0.0601348	0.269482
TBC1D7	-0.192621	4.98772	-3.74267	0.000285611	0.0605712	0.24557
CHEK1	-0.258135	4.58866	-3.74429	0.000283982	0.0605712	0.25051
TMPRSS2	-0.632694	6.52679	-3.74355	0.000284726	0.0605712	0.248251
KATNAL2	0.184325	5.09441	3.73782	0.000290569	0.0608571	0.230711
RPL13	-0.489634	8.88597	-3.73924	0.000289107	0.0608571	0.235067
CCL2	1.1453	8.60926	3.71316	0.000317033	0.0618689	0.155479
PLBD2	0.34327	7.14685	3.70193	0.000329841	0.0618689	0.121312
SNCA	0.318593	5.63525	3.70898	0.000321742	0.0618689	0.14276
CCNYL1	0.275265	6.13454	3.72836	0.000300463	0.0618689	0.201806
EFHD2	0.204962	7.08997	3.70156	0.000330261	0.0618689	0.120214
SNX24	0.180503	4.77281	3.72518	0.000303866	0.0618689	0.192086
SVOPL	-0.233499	4.39372	-3.71195	0.000318394	0.0618689	0.151784
ZNF793	-0.275054	5.20601	-3.70699	0.000324012	0.0618689	0.136693
FLJ25694	-0.283728	4.64857	-3.72113	0.000308238	0.0618689	0.179758
CPAMD8	-0.297147	6.17416	-3.7203	0.000309146	0.0618689	0.177218
ZNF334	-0.378298	5.41864	-3.70411	0.000327315	0.0618689	0.127944
EIF3E	-0.378503	6.16306	-3.70991	0.000320698	0.0618689	0.145564
RPL7A	-0.384948	8.44703	-3.71136	0.000319052	0.0618689	0.150002
FBL	-0.460039	8.59761	-3.7256	0.00030341	0.0618689	0.193381
RPS28	-0.480793	10.9172	-3.70228	0.000329436	0.0618689	0.122372
RPL36	-0.487086	9.22794	-3.71518	0.000314783	0.0618689	0.161624
FAM3B	-0.541418	5.62425	-3.71203	0.000318305	0.0618689	0.152026
GOLGA8B	-0.604972	7.6936	-3.72987	0.000298868	0.0618689	0.206401
FMO1	-0.662346	6.26264	-3.71349	0.000316666	0.0618689	0.156479
LILRB4	0.228865	5.64962	3.69728	0.000335279	0.0621764	0.107208
ZNF544	-0.290189	5.70846	-3.69476	0.000338265	0.0621764	0.0995594
HIST1H2BM	-0.451425	4.53876	-3.69391	0.000339278	0.0621764	0.0969812
GPM6B	-0.659316	6.64639	-3.6963	0.00033643	0.0621764	0.104251
RPL4	-0.333321	10.736	-3.68925	0.000344875	0.0626619	0.0828709
GPR98	-0.701507	4.38086	-3.68862	0.000345644	0.0626619	0.0809492
RPL22	-0.219286	7.72228	-3.6867	0.00034798	0.0627481	0.0751404
FIBIN	0.687181	6.68931	3.68351	0.000351898	0.0630365	0.0654868
SNHG1	-0.631866	6.18404	-3.68236	0.000353319	0.0630365	0.0620133
TMOD1	0.451216	6.61609	3.67788	0.000358914	0.0636979	0.0484662
SMARCC1	-0.413311	7.77395	-3.67295	0.000365166	0.064468	0.0335812
SERPINB8	0.367115	6.28251	3.66857	0.0003708	0.0651217	0.0203838
FGF13-AS1	0.37827	4.29734	3.65485	0.000389016	0.0654446	-0.0209449
LINC00857	0.301345	3.62778	3.66252	0.000378738	0.0654446	0.00212878
FGF9	0.297778	4.45079	3.66002	0.000382048	0.0654446	-0.00537134
MAP3K6	0.242468	6.80067	3.6516	0.000393448	0.0654446	-0.0307046
ING4	-0.168809	6.53873	-3.66217	0.000379199	0.0654446	0.0010786
NREP	-0.254838	5.61785	-3.647	0.00039981	0.0654446	-0.0445226
RPL3	-0.270231	7.72172	-3.64849	0.000397735	0.0654446	-0.0400408
ZCCHC7	-0.282369	5.98316	-3.65523	0.0003885	0.0654446	-0.0198014
BTF3	-0.320462	7.89185	-3.66489	0.000375611	0.0654446	0.00927295
ENPP6	-0.450345	4.3262	-3.65082	0.000394524	0.0654446	-0.033058
FZD1	-0.532526	6.3841	-3.65203	0.000392863	0.0654446	-0.0294223
NSUN7	-0.601914	4.61559	-3.65848	0.000384115	0.0654446	-0.0100203
ZNF711	-0.627206	5.16254	-3.6563	0.000387056	0.0654446	-0.0165916
EGF	-1.13507	5.78489	-3.64799	0.000398436	0.0654446	-0.0415583
JARID2	-0.272389	6.84474	-3.64401	0.00040399	0.065493	-0.0534818
ZNF285	-0.369287	4.51892	-3.64526	0.000402239	0.065493	-0.0497404
ICAM1	0.665993	6.78333	3.63383	0.00041856	0.0668903	-0.0839963
LOC100133091	-0.250239	6.77939	-3.63466	0.00041736	0.0668903	-0.0815246
CCDC138	-0.361411	3.85727	-3.63447	0.000417626	0.0668903	-0.0820716
HIST1H2AL	-0.310703	3.75657	-3.63182	0.000421497	0.067042	-0.0900185
GPC4	0.337476	6.00095	3.62942	0.000425026	0.0672858	-0.0971974
ADH4	0.361615	3.29038	3.61368	0.000448866	0.0688883	-0.144177
MSC	0.30574	5.22409	3.61201	0.000451481	0.0688883	-0.149176
ZNF529	-0.183966	4.48196	-3.61599	0.000445286	0.0688883	-0.137284
RPL24	-0.378427	9.64841	-3.61336	0.000449362	0.0688883	-0.145128
RPL17	-0.410218	9.95139	-3.61303	0.000449881	0.0688883	-0.146122
EIF3L	-0.416582	9.02525	-3.61336	0.000449372	0.0688883	-0.145148
MFGE8	-0.430088	6.5105	-3.61292	0.000450046	0.0688883	-0.146438
MUC4	-0.670695	6.66674	-3.612	0.000451492	0.0688883	-0.149198
MIR597	-0.376089	3.29314	-3.60096	0.000469067	0.070928	-0.18206
H2AFY2	-0.396217	6.81447	-3.6015	0.000468189	0.070928	-0.180447
NEO1	-0.553316	7.74603	-3.596	0.000477161	0.0718298	-0.196779
TNS3	0.490438	7.03765	3.59199	0.000483801	0.0718668	-0.208666
SMN1	-0.386188	6.19795	-3.59323	0.000481739	0.0718668	-0.204993
BCL11A	-0.511193	5.89455	-3.59226	0.000483363	0.0718668	-0.207888
GFRA2	0.310179	6.13956	3.58889	0.000489014	0.0720068	-0.217886
IRX1	-0.556826	7.06262	-3.58984	0.000487401	0.0720068	-0.215043
TMEM130	-0.339787	6.03389	-3.58586	0.000494142	0.0724455	-0.226857
TAS2R5	-0.318917	4.25366	-3.58405	0.000497237	0.0725837	-0.232228
GIPC1	0.17637	6.87385	3.57965	0.000504824	0.0731909	-0.24525
GNG7	-0.332905	6.62663	-3.57912	0.000505738	0.0731909	-0.246805
PABPC3	-0.191824	3.41294	-3.57689	0.000509637	0.07344	-0.253409
ANKRD16	-0.192805	6.13864	-3.57382	0.000515041	0.0737239	-0.262478
SNORA7B	-0.248025	6.41117	-3.57329	0.00051598	0.0737239	-0.264043
GPRC5A	0.664945	6.80905	3.56299	0.000534552	0.073983	-0.294441
NFATC2	0.455921	6.81502	3.56692	0.000527399	0.073983	-0.282862
BPGM	0.207046	6.40269	3.56399	0.000532711	0.073983	-0.291477
RPP38	-0.152361	6.46548	-3.56296	0.000534611	0.073983	-0.294537
RNF43	-0.53775	5.97224	-3.56949	0.000522765	0.073983	-0.275275
ABHD17C	-0.570584	4.68065	-3.57078	0.000520454	0.073983	-0.271467
SLC26A5	-0.621581	4.06243	-3.56256	0.000535346	0.073983	-0.295717
LOC100124692	-1.08252	5.45369	-3.56465	0.000531517	0.073983	-0.289547
FGGY	-0.151898	5.02862	-3.55732	0.000545032	0.0748613	-0.311129
NACA	-0.291263	8.44297	-3.55673	0.000546141	0.0748613	-0.312875
CGNL1	-0.445009	5.72639	-3.5546	0.00055014	0.0751042	-0.319145
RP11-307P5.1	-0.377317	3.69803	-3.55045	0.000558013	0.0758718	-0.331355
CFB	0.463053	6.67067	3.54229	0.000573801	0.0767801	-0.355324
C16orf45	0.322197	6.73996	3.54485	0.0005688	0.0767801	-0.347803
PDE7B	-0.475704	6.5984	-3.54272	0.000572964	0.0767801	-0.35407
FOLH1	-0.666976	5.06871	-3.54274	0.000572914	0.0767801	-0.353995
BMPR1B	0.314296	3.79182	3.54066	0.000577004	0.0769034	-0.360105
SHMT2	-0.330818	7.02949	-3.53771	0.000582837	0.0773751	-0.368745
SPRYD3	0.191924	7.00811	3.53453	0.000589193	0.0779121	-0.37806
HTATIP2	0.185412	6.34653	3.53284	0.000592609	0.0780577	-0.383025
CCDC68	0.309605	3.42229	3.53074	0.000596867	0.0783127	-0.389173
KCNMB4	-0.268498	5.6367	-3.52396	0.000610805	0.0787664	-0.408994
SEMA5A	-0.436912	6.27621	-3.52765	0.000603172	0.0787664	-0.398197
RNF152	-0.483094	6.61335	-3.52338	0.000612005	0.0787664	-0.410679
KLF5	-0.789374	7.69974	-3.52616	0.000606238	0.0787664	-0.40255
LOC93432	-1.01022	5.40487	-3.52365	0.000611445	0.0787664	-0.409893
GABRA2	0.581984	3.62306	3.51907	0.000621044	0.0790249	-0.423266
EEF2	-0.347703	11.7066	-3.52076	0.000617487	0.0790249	-0.418335
EPHB3	-0.668688	6.8352	-3.51916	0.000620852	0.0790249	-0.423001
FAM189A2	-0.646089	6.63269	-3.51569	0.000628231	0.0796389	-0.433143
PRKCD	0.472382	7.44433	3.50667	0.000647767	0.0798068	-0.459426
SRGAP3	-0.16351	5.52342	-3.50985	0.000640809	0.0798068	-0.450158
APBA2	-0.184889	4.95736	-3.50962	0.000641305	0.0798068	-0.450821
XKR6	-0.208543	4.721	-3.50523	0.000650945	0.0798068	-0.463625
TUG1	-0.23935	7.43917	-3.50725	0.000646491	0.0798068	-0.457734
IGSF3	-0.443378	6.61423	-3.51242	0.000635252	0.0798068	-0.442682
OXGR1	-0.447807	4.58223	-3.5095	0.000641567	0.0798068	-0.451172
RPLP0	-0.471911	9.82026	-3.50835	0.00064408	0.0798068	-0.454527
RPS5	-0.613055	9.95099	-3.5042	0.000653223	0.0798068	-0.466623
FOLH1B	-0.649342	4.42562	-3.50467	0.000652171	0.0798068	-0.46524
RPL18	-0.258614	8.33906	-3.50207	0.00065795	0.0800941	-0.47281
BGN	0.678466	8.73845	3.49413	0.000675875	0.0807459	-0.495871
PEPD	0.427049	8.06366	3.48995	0.00068551	0.0807459	-0.508012
SAMD4A	0.30854	6.35377	3.48534	0.000696273	0.0807459	-0.521374
MKX	0.297271	4.7772	3.48846	0.000688969	0.0807459	-0.512329
ACSF2	0.200928	6.45393	3.49502	0.000673852	0.0807459	-0.493299
PSTK	-0.168051	4.74727	-3.49839	0.000666199	0.0807459	-0.483499
RPL37A	-0.18205	5.11188	-3.48614	0.000694387	0.0807459	-0.519048
RPS17	-0.282729	9.84044	-3.48307	0.000701618	0.0807459	-0.527932
RPL26	-0.294718	11.2059	-3.49269	0.000679187	0.0807459	-0.500063
RBM18	-0.336943	7.45185	-3.48409	0.000699203	0.0807459	-0.524975
LDB1	-0.35917	8.68614	-3.48319	0.000701353	0.0807459	-0.527607
RPSA	-0.413452	6.6345	-3.49262	0.000679332	0.0807459	-0.500247
ITGA6	-0.519964	8.25442	-3.49044	0.00068438	0.0807459	-0.506598
GRHL1	-0.725255	6.65006	-3.48537	0.000696186	0.0807459	-0.521267
AREG	-1.16349	7.20251	-3.48579	0.00069522	0.0807459	-0.520076
LRP2	-1.46836	6.76171	-3.49688	0.000669615	0.0807459	-0.487888
CYTH4	0.178142	6.55755	3.48201	0.000704136	0.0807601	-0.531004
BCAT1	0.522639	5.68447	3.47599	0.000718597	0.0814143	-0.548436
CTPS2	-0.279022	6.34419	-3.47562	0.000719498	0.0814143	-0.549509
RPL18A	-0.391253	11.2972	-3.47738	0.000715233	0.0814143	-0.544412
SNORD22	-0.566093	6.19233	-3.4767	0.000716867	0.0814143	-0.546368
CNKSR2	0.513346	5.16888	3.46661	0.000741662	0.0814443	-0.575519
TENM4	0.253244	5.15976	3.46537	0.000744747	0.0814443	-0.579077
LINC01204	0.190963	2.91062	3.46992	0.000733428	0.0814443	-0.565949
SETD6	-0.152871	6.22612	-3.46361	0.000749172	0.0814443	-0.584153
DDX49	-0.204615	7.03717	-3.46687	0.000741015	0.0814443	-0.57477
LPPR1	-0.210107	4.69006	-3.47057	0.000731838	0.0814443	-0.564088
CNPY2	-0.240688	7.85706	-3.46546	0.000744527	0.0814443	-0.578823
EIF3F	-0.316147	8.47827	-3.46282	0.000751162	0.0814443	-0.586427
ZFAS1	-0.370981	7.81271	-3.47367	0.000724222	0.0814443	-0.55512
ROPN1	-0.383462	6.00347	-3.46434	0.000747345	0.0814443	-0.582061
RPL13A	-0.434988	9.11581	-3.46831	0.000737432	0.0814443	-0.570616
PDCD4	-0.632942	9.56933	-3.46393	0.000748377	0.0814443	-0.583243
SAMD5	-1.00884	6.45642	-3.47218	0.000727864	0.0814443	-0.559421
COL12A1	0.589395	7.9462	3.45734	0.000765144	0.081963	-0.602232
IP6K2	-0.206418	6.34008	-3.45733	0.000765156	0.081963	-0.602246
AHCY	-0.321157	6.4494	-3.45713	0.000765668	0.081963	-0.602819
ERBB3	-0.683174	5.50977	-3.45807	0.000763254	0.081963	-0.600113
MAML3	-0.208829	6.77021	-3.45353	0.000774984	0.0821776	-0.613182
RP11-466L17.1	-0.244919	3.90608	-3.45427	0.000773071	0.0821776	-0.611064
RPL34	-0.275271	5.47989	-3.4549	0.000771429	0.0821776	-0.609242
DKC1	-0.324928	7.05435	-3.4494	0.000785799	0.0830631	-0.625054
ZBTB26	-0.232123	5.30949	-3.4474	0.000791084	0.0833604	-0.630796
TMEM87A	-0.565742	8.12406	-3.446	0.000794818	0.083493	-0.634831
HEPACAM2	-0.67028	4.22949	-3.44318	0.000802347	0.0840222	-0.642906
HRCT1	0.39484	6.73995	3.44163	0.000806531	0.0841989	-0.647361
IFITM4P	0.347832	6.62574	3.43289	0.00083047	0.0854274	-0.672409
LCP2	0.276843	5.98228	3.43396	0.00082749	0.0854274	-0.669331
ACTR3B	-0.271755	6.05696	-3.43351	0.000828761	0.0854274	-0.670646
TMEM97	-0.285535	6.13051	-3.43487	0.000824985	0.0854274	-0.666735
CHRM3	-0.426217	3.86365	-3.43271	0.000830966	0.0854274	-0.672921
RP11-473M10.3	-0.309236	2.60662	-3.43003	0.000838432	0.0854318	-0.680579
RPL37	-0.311025	9.42785	-3.42907	0.000841143	0.0854318	-0.683343
BTBD3	-0.325274	6.63264	-3.43038	0.000837462	0.0854318	-0.679588
EBPL	-0.407213	7.0125	-3.42995	0.000838677	0.0854318	-0.680829
KRAS	0.217389	6.7996	3.42676	0.000847652	0.0855773	-0.689942
C3orf58	-0.328158	6.05968	-3.42693	0.000847168	0.0855773	-0.689454
ERN1	-0.323946	6.28311	-3.42559	0.00085096	0.0856142	-0.693277
EHF	-1.46451	7.94863	-3.42484	0.000853096	0.0856142	-0.695422
KBTBD7	-0.278078	6.52499	-3.42305	0.000858211	0.0858721	-0.70054
KDM1A	-0.316212	7.8738	-3.41935	0.000868864	0.086425	-0.711099
RPL8	-0.351423	10.6982	-3.42002	0.000866922	0.086425	-0.709185
ETV6	-0.659791	8.65029	-3.41722	0.000875051	0.0867845	-0.717172
TGIF2	-0.210552	6.63489	-3.41254	0.000888799	0.0873203	-0.730513
RPL29P2	-0.26858	6.42006	-3.41315	0.00088701	0.0873203	-0.728789
GMDS	-0.307174	6.46328	-3.41186	0.000890812	0.0873203	-0.732449
DYM	-0.357455	7.82711	-3.41337	0.000886363	0.0873203	-0.728165
SPP1	0.894086	6.33047	3.40876	0.000900061	0.0875307	-0.741287
RAI2	0.266605	6.40298	3.40763	0.000903457	0.0875307	-0.744509
MKNK1	0.22133	6.59316	3.4074	0.000904124	0.0875307	-0.745141
ZNF667	-0.23539	5.33019	-3.41009	0.000896093	0.0875307	-0.737507
CTBP2	-0.318409	7.25674	-3.4068	0.000905937	0.0875307	-0.746855
GSTO2	-0.420278	4.58556	-3.40497	0.000911463	0.0878129	-0.752057
ASRGL1	0.204087	5.64577	3.40082	0.000924129	0.0887796	-0.763863
RPL14	-0.264406	9.25574	-3.39342	0.000947102	0.0906554	-0.784865
CNKSR3	-0.368953	5.94662	-3.39281	0.000949032	0.0906554	-0.786606
POLE	-0.134174	6.29653	-3.38716	0.000966966	0.0912912	-0.802614
EDC3	-0.213212	7.18596	-3.38561	0.000971932	0.0912912	-0.806994
SLC12A1	-0.220144	2.9811	-3.38848	0.000962722	0.0912912	-0.798853
TCF25	-0.225101	7.73807	-3.38589	0.000971039	0.0912912	-0.806208
RPS12	-0.301008	9.83411	-3.38597	0.000970785	0.0912912	-0.805984
FAM60A	-0.672389	7.1465	-3.38968	0.000958907	0.0912912	-0.795458
SNORA17	-0.249407	6.71551	-3.38439	0.000975877	0.0914072	-0.810457
LINC01133	0.503222	4.2336	3.38023	0.000989379	0.0921598	-0.822203
ATP5G2	-0.322726	8.18861	-3.38049	0.000988534	0.0921598	-0.821473
SYNE1	0.363376	6.17013	3.3783	0.000995732	0.092242	-0.827675
MAP3K1	-0.666917	7.99829	-3.37909	0.000993123	0.092242	-0.825432
RALB	0.153107	7.8945	3.37744	0.000998561	0.0922506	-0.8301
MSR1	0.509254	5.89115	3.37278	0.00101406	0.0931718	-0.843263
TRAP1	-0.340154	7.96273	-3.37335	0.00101215	0.0931718	-0.841651
GPX7	-0.263907	6.63969	-3.37177	0.00101742	0.0932267	-0.846092
SFXN3	0.229694	6.68786	3.36908	0.0010265	0.0938039	-0.853686
CSF1	0.385385	7.42968	3.36628	0.00103602	0.0944181	-0.861575
LOC101929491	-0.261973	2.57577	-3.36285	0.0010478	0.0952342	-0.871233
CPB1	0.774873	3.92831	3.36074	0.00105514	0.0956434	-0.877197
SYCP1	0.218391	2.35832	3.35906	0.00106096	0.0956569	-0.881898
RSPO1	-0.683994	6.88161	-3.35975	0.00105858	0.0956569	-0.879978
PRUNE2	0.412061	4.15696	3.35665	0.00106945	0.0959089	-0.888701
LILRB5	0.319838	5.92379	3.35702	0.00106811	0.0959089	-0.887635
TPD52L1	-0.323167	6.3152	-3.35429	0.00107778	0.0963998	-0.89533
NPL	0.288039	4.76845	3.34902	0.00109659	0.0965429	-0.910107
FAN1	-0.19065	6.21089	-3.34905	0.00109651	0.0965429	-0.910044
NOP56	-0.249254	7.79185	-3.35044	0.00109151	0.0965429	-0.906138
TET2	-0.299172	6.74674	-3.34858	0.0010982	0.0965429	-0.911358
CCT4	-0.355428	8.46653	-3.34824	0.00109942	0.0965429	-0.912308
FKBP4	-0.565799	7.82718	-3.35297	0.00108244	0.0965429	-0.899016
EPCAM	-1.07971	7.55866	-3.34944	0.0010951	0.0965429	-0.908949
CCDC14	-0.445819	5.84612	-3.34718	0.00110325	0.0966279	-0.91528
CAP1	0.194092	8.58576	3.34634	0.00110631	0.0966443	-0.917641
LIAS	-0.259224	5.52158	-3.34084	0.00112646	0.0977496	-0.933051
CREB3L4	-0.277847	6.29567	-3.34188	0.00112261	0.0977496	-0.930129
FAIM2	-0.343756	6.24863	-3.34051	0.00112766	0.0977496	-0.93396
GEMIN8	-0.179378	5.83362	-3.33869	0.00113441	0.097832	-0.939058
KDM5B	-0.36226	7.25777	-3.33874	0.00113422	0.097832	-0.938917
TRMT1	-0.191282	6.79939	-3.33597	0.0011446	0.0980983	-0.946691
KLF3-AS1	-0.217512	5.24303	-3.33453	0.00115	0.0980983	-0.950711
LINC00640	-0.21876	3.91832	-3.33406	0.00115177	0.0980983	-0.952021
ZNF774	-0.488715	5.97316	-3.33598	0.00114454	0.0980983	-0.946646
TNFSF11	-0.728123	4.82914	-3.33399	0.00115204	0.0980983	-0.952224
DGKI	0.224881	4.1909	3.33185	0.00116014	0.0984003	-0.958197
RPL19	-0.317877	11.1896	-3.33151	0.00116143	0.0984003	-0.959147
MCM7	-0.253881	6.91248	-3.32629	0.00118144	0.0998447	-0.973724
PAXIP1-AS1	-0.278375	6.63006	-3.32548	0.00118459	0.0998608	-0.975998
XYLB	-0.219233	6.02655	-3.32203	0.001198	0.100489	-0.985606
NEUROG2	-0.284683	5.29792	-3.32268	0.00119547	0.100489	-0.983799
TGFB1	0.331624	7.30696	3.32059	0.00120365	0.100681	-0.989619
EIF2D	-0.198546	7.14789	-3.31942	0.00120826	0.100681	-0.992882
PLEKHG4B	-0.234952	5.89047	-3.31883	0.0012106	0.100681	-0.994531
CHRM1	-0.236803	5.64071	-3.31827	0.00121282	0.100681	-0.996095
RPL9	-0.399704	9.60446	-3.31766	0.00121521	0.100681	-0.997773
ROPN1B	-0.39717	6.19378	-3.31528	0.00122471	0.101219	-1.00441
RP11-371I1.2	-0.240074	5.70989	-3.3139	0.00123022	0.10124	-1.00824
PDGFA	-0.280539	7.53337	-3.31325	0.00123286	0.10124	-1.01007
ZNF830	-0.310887	7.70166	-3.31297	0.00123398	0.10124	-1.01084
PAPPA2	0.400674	4.76019	3.30656	0.00126	0.101898	-1.02864
NABP1	0.385924	6.1467	3.30696	0.00125836	0.101898	-1.02753
IFT172	-0.200836	5.92644	-3.30653	0.00126012	0.101898	-1.02872
PYROXD2	-0.249328	6.2054	-3.30793	0.0012544	0.101898	-1.02485
KAT2A	-0.278305	6.8854	-3.30881	0.00125081	0.101898	-1.0224
IL17RD	-0.499468	7.0053	-3.30773	0.00125522	0.101898	-1.0254
EIF3G	-0.267978	8.67784	-3.30555	0.00126418	0.101981	-1.03147
ITGB2	0.175918	6.87078	3.30328	0.00127353	0.102246	-1.03775
SFRP1	-0.770315	9.81156	-3.30401	0.00127051	0.102246	-1.03572
RPS3A	-0.402005	10.0115	-3.30238	0.00127728	0.102304	-1.04026
SRPX2	0.62191	6.91192	3.29448	0.00131053	0.103026	-1.06216
SLC1A3	0.522556	5.47099	3.2821	0.00136421	0.103026	-1.09637
GFPT2	0.520011	6.63088	3.28537	0.00134985	0.103026	-1.08736
S100A9	0.516066	6.9508	3.28012	0.00137301	0.103026	-1.10185
LOC101927069	0.412268	3.98326	3.2756	0.00139323	0.103026	-1.1143
NCEH1	0.370885	5.32586	3.29098	0.00132547	0.103026	-1.07183
CMKLR1	0.36996	5.87536	3.2929	0.00131726	0.103026	-1.06653
CD97	0.351202	7.10846	3.28368	0.00135724	0.103026	-1.09201
GPR133	0.327488	5.18882	3.27754	0.00138453	0.103026	-1.10897
LOC729970	0.296894	5.22542	3.27627	0.00139023	0.103026	-1.11247
KCNJ5	0.291184	5.22732	3.27715	0.00138627	0.103026	-1.11004
NCF4	0.265586	6.20605	3.29505	0.0013081	0.103026	-1.06058
LOC101928136	0.253569	4.02593	3.28996	0.0013299	0.103026	-1.07467
LOC101928138	0.221834	3.42357	3.29521	0.0013074	0.103026	-1.06012
IFI35	0.204998	6.42891	3.27907	0.00137769	0.103026	-1.10475
MSN	0.203501	6.94597	3.28948	0.00133194	0.103026	-1.07597
MAPRE3	0.176127	6.2724	3.28299	0.00136029	0.103026	-1.09392
SMIM12	0.153657	6.42227	3.28733	0.00134127	0.103026	-1.08193
FAHD2A	-0.173214	5.95129	-3.28281	0.00136107	0.103026	-1.09441
TOP1MT	-0.185258	6.42062	-3.27971	0.00137484	0.103026	-1.10298
ICOSLG	-0.194555	5.74422	-3.27705	0.0013867	0.103026	-1.1103
SLC2A9	-0.21836	5.09796	-3.29394	0.0013128	0.103026	-1.06364
RPSAP9	-0.224584	4.22469	-3.29415	0.00131192	0.103026	-1.06307
ZNF586	-0.243665	6.34713	-3.28872	0.00133527	0.103026	-1.0781
TAPT1-AS1	-0.245767	5.10194	-3.29538	0.0013067	0.103026	-1.05967
WDR6	-0.274229	7.12884	-3.28704	0.00134255	0.103026	-1.08274
VTRNA2-2P	-0.284888	3.37993	-3.27592	0.0013918	0.103026	-1.11343
SLC25A38	-0.285344	6.51635	-3.28853	0.00133605	0.103026	-1.0786
RPS2P32	-0.300611	7.34174	-3.29202	0.00132104	0.103026	-1.06897
MLLT4	-0.333836	7.45038	-3.27844	0.00138047	0.103026	-1.10647
RPL27	-0.347285	9.3545	-3.29715	0.00129919	0.103026	-1.05476
CCNG2	-0.354493	7.81518	-3.28865	0.00133557	0.103026	-1.0783
CEP95	-0.372528	6.84282	-3.28272	0.0013615	0.103026	-1.09468
PPAT	-0.460646	5.5152	-3.28143	0.00136717	0.103026	-1.09822
SESN3	-0.516021	8.66149	-3.2902	0.00132886	0.103026	-1.074
ZNF562	-0.514028	7.23869	-3.2747	0.0013973	0.103101	-1.11679
ADNP	-0.242796	7.28889	-3.27148	0.00141195	0.103664	-1.12567
SERINC5	-0.256525	5.76299	-3.26964	0.00142033	0.103664	-1.13071
CES3	-0.291496	5.47198	-3.27221	0.0014086	0.103664	-1.12365
RPS27A	-0.296429	6.85527	-3.26909	0.00142286	0.103664	-1.13223
RSL1D1	-0.414068	9.52377	-3.26898	0.00142339	0.103664	-1.13254
BZW2	-0.453703	6.6396	-3.26908	0.00142292	0.103664	-1.13226
TAF13	0.330026	5.9505	3.26712	0.00143195	0.10384	-1.13765
SMC4	-0.328618	5.68969	-3.26721	0.00143153	0.10384	-1.1374
DUSP9	-0.200829	5.83352	-3.26484	0.00144252	0.10431	-1.14392
SCAI	-0.244565	5.7315	-3.26439	0.00144463	0.10431	-1.14516
PLA2G2A	0.613761	6.11109	3.25531	0.00148757	0.104447	-1.17009
ENPP4	0.378181	5.86348	3.25932	0.00146848	0.104447	-1.1591
FPR1	0.326636	4.60412	3.25844	0.00147263	0.104447	-1.1615
S100A6	0.277017	6.932	3.2533	0.00149724	0.104447	-1.17561
HCLS1	0.256602	6.03061	3.25957	0.00146729	0.104447	-1.15841
BRD7P3	0.201736	2.54313	3.25289	0.00149918	0.104447	-1.17671
ZEB2-AS1	0.190173	4.29697	3.26068	0.00146203	0.104447	-1.15535
STK36	-0.178912	5.93111	-3.25634	0.00148264	0.104447	-1.16727
CDCA7	-0.220582	3.26784	-3.25431	0.00149237	0.104447	-1.17284
PAN2	-0.246616	6.31755	-3.26014	0.00146459	0.104447	-1.15684
METTL21B	-0.272344	6.65297	-3.25827	0.00147342	0.104447	-1.16196
RFC5	-0.287968	5.61611	-3.25508	0.00148867	0.104447	-1.17072
EFCAB4B	-0.302312	5.90907	-3.25798	0.0014748	0.104447	-1.16275
NONO	-0.335068	9.04183	-3.25292	0.00149904	0.104447	-1.17663
MGA	-0.353359	7.23408	-3.25862	0.0014718	0.104447	-1.16102
HIST1H3E	-0.37631	4.80388	-3.25673	0.00148075	0.104447	-1.16618
APEX1	-0.416128	9.19705	-3.25423	0.00149275	0.104447	-1.17305
IRF8	0.233556	6.6744	3.25158	0.00150553	0.104673	-1.18031
RPL29	-0.269797	7.49456	-3.24924	0.0015169	0.104824	-1.18671
RPL5	-0.28678	8.10639	-3.24922	0.00151702	0.104824	-1.18678
PRSS8	-0.711384	8.07788	-3.25006	0.00151293	0.104824	-1.18448
S100A10	0.542114	9.08949	3.24688	0.00152849	0.1054	-1.19319
C7	0.882004	6.90352	3.24052	0.00156005	0.10542	-1.21058
PLEK	0.579654	6.05076	3.2431	0.00154716	0.10542	-1.20352
MID1IP1	0.307218	6.36188	3.24173	0.00155401	0.10542	-1.20728
RP11-80H8.4	0.193169	3.45798	3.2445	0.00154021	0.10542	-1.19969
RIPK3	0.173956	5.71214	3.24127	0.0015563	0.10542	-1.20853
AC092667.2	-0.242849	3.42372	-3.24091	0.00155806	0.10542	-1.20949
TEX10	-0.299486	6.34583	-3.24539	0.00153582	0.10542	-1.19726
NPM1	-0.315308	8.85588	-3.24358	0.00154479	0.10542	-1.20222
RPL13AP20	-0.372385	9.7772	-3.24098	0.00155774	0.10542	-1.20932
HELLS	-0.417433	4.62162	-3.24427	0.00154135	0.10542	-1.20032
VSIG4	0.767812	7.18784	3.23852	0.00157006	0.105674	-1.21602
SNORA70B	-0.386862	4.75863	-3.23911	0.00156711	0.105674	-1.21442
LINC01239	0.62808	4.31331	3.23567	0.00158452	0.106195	-1.22382
NKRF	-0.277967	4.94945	-3.23538	0.00158599	0.106195	-1.22461
NIPSNAP1	-0.32791	6.41546	-3.23457	0.00159013	0.106195	-1.22682
SLC5A1	-0.604961	6.0984	-3.23451	0.0015904	0.106195	-1.22697
ARHGEF40	0.205901	6.67711	3.23348	0.00159567	0.106336	-1.22978
NACC2	0.224274	6.58499	3.23145	0.00160611	0.106821	-1.23533
FAM210B	-0.292371	8.45555	-3.2304	0.00161151	0.106969	-1.23818
CADM3-AS1	0.319703	5.6828	3.22751	0.00162651	0.107558	-1.24606
HPSE	0.217607	4.53523	3.22746	0.00162676	0.107558	-1.24619
MLLT4-AS1	-0.230539	3.99018	-3.22649	0.00163182	0.107681	-1.24883
SIX1	0.306453	4.57868	3.22448	0.00164235	0.107743	-1.2543
MIR563	-0.288956	2.75242	-3.2249	0.00164015	0.107743	-1.25316
TOM1L1	-0.692286	7.5694	-3.22548	0.00163708	0.107743	-1.25157
TRAF4	-0.233232	6.23265	-3.22315	0.00164934	0.107991	-1.25791
TMEM163	-0.172551	5.17515	-3.22134	0.00165895	0.108411	-1.26285
ELL3	-0.257031	5.43557	-3.21957	0.00166832	0.108812	-1.26764
PRH1	-0.182849	5.14126	-3.2183	0.00167512	0.109044	-1.27109
SYT7	-0.234619	6.41325	-3.21641	0.00168531	0.109496	-1.27625
ZNF286A	-0.210655	5.9744	-3.21548	0.00169028	0.109608	-1.27876
RPLP1	-0.316494	7.97507	-3.21454	0.00169538	0.109728	-1.28132
ERP29	-0.219084	5.11981	-3.21342	0.00170143	0.109908	-1.28434
SNTB1	-0.316334	6.26131	-3.21098	0.00171476	0.110558	-1.29097
FCGR3A	0.365646	5.60097	3.20993	0.0017205	0.110642	-1.29381
PVT1	-0.322315	5.12565	-3.20895	0.00172591	0.110642	-1.29648
CKS2	-0.445815	5.53855	-3.20903	0.00172547	0.110642	-1.29626
HPSE2	-0.717564	6.29892	-3.20764	0.00173311	0.110893	-1.30002
LILRB1	0.162088	5.76638	3.20682	0.00173767	0.110974	-1.30225
CXCL9	0.684129	5.62423	3.20536	0.00174577	0.11128	-1.3062
PPIH	-0.143969	5.60354	-3.2045	0.00175057	0.111359	-1.30853
METAP1	-0.408854	6.35552	-3.20395	0.0017536	0.111359	-1.31
KIF22	-0.183404	6.33876	-3.20322	0.0017577	0.111409	-1.31199
TXNL4B	-0.191607	6.18837	-3.20238	0.00176241	0.111498	-1.31426
HIST1H4J	-0.346476	5.48213	-3.20145	0.00176761	0.111618	-1.31677
POLR2L	0.323291	7.48025	3.19968	0.00177762	0.111831	-1.32156
TIGD2	-0.729782	5.54438	-3.19996	0.00177604	0.111831	-1.32081
POLR3A	-0.20387	6.14605	-3.19891	0.00178198	0.111896	-1.32364
ZNF561	-0.383412	6.75609	-3.19779	0.00178837	0.112051	-1.32668
ANK3	-0.52827	6.12461	-3.19731	0.00179108	0.112051	-1.32797
RPS6KA5	-0.553052	6.28731	-3.19663	0.00179497	0.112086	-1.32981
PRADC1	0.231192	6.18367	3.19565	0.00180057	0.112228	-1.33246
ZC3HAV1L	-0.22596	6.71941	-3.19467	0.00180617	0.112369	-1.33509
LOC100132741	0.380079	5.26819	3.19296	0.00181602	0.112774	-1.33971
HIST1H3F	-0.435937	5.64158	-3.19192	0.00182207	0.112942	-1.34254
DYNLT3	0.259461	7.03574	3.18996	0.00183342	0.113229	-1.34781
LOC100289561	-0.114898	6.94888	-3.19041	0.00183078	0.113229	-1.34659
EZH2	-0.224555	4.7811	-3.18761	0.00184717	0.11387	-1.35416
FOLR2	0.649829	7.02837	3.18688	0.00185143	0.113924	-1.35611
SRRM2	-0.232835	9.72955	-3.18522	0.00186124	0.114319	-1.36059
RPL28	-0.22096	6.07289	-3.18422	0.00186713	0.114472	-1.36328
EXOSC5	-0.305885	6.87428	-3.18318	0.00187333	0.114533	-1.3661
SOX4	-0.712688	8.27304	-3.18291	0.00187492	0.114533	-1.36681
TNFSF4	0.233658	3.0196	3.18116	0.00188533	0.114794	-1.37152
TBC1D4	-0.318795	7.16032	-3.18105	0.001886	0.114794	-1.37182
C19orf48	-0.246709	6.18625	-3.18006	0.00189193	0.114948	-1.37448
PRPSAP1	-0.164671	6.42326	-3.17707	0.00190994	0.115833	-1.38252
FUT6	-0.151992	5.68923	-3.17638	0.00191409	0.115876	-1.38436
TNFAIP8	0.2433	5.89194	3.17581	0.00191759	0.11588	-1.38591
RAB25	-0.678565	6.6271	-3.17439	0.00192618	0.116191	-1.38971
EXOSC2	-0.241445	6.48377	-3.17009	0.0019526	0.117475	-1.40127
EIF3H	-0.27906	6.92535	-3.16923	0.00195791	0.117475	-1.40357
RAB11FIP1	-0.379893	6.96281	-3.16954	0.00195599	0.117475	-1.40274
GALNT15	0.621358	6.34802	3.16499	0.00198434	0.118135	-1.41495
PLEKHO2	0.321505	7.06768	3.16174	0.00200477	0.118135	-1.42363
TNR-IT1	0.299712	4.34031	3.16064	0.00201174	0.118135	-1.42658
PTAFR	0.236597	5.83613	3.16054	0.00201237	0.118135	-1.42684
SGMS2	0.227215	4.41526	3.16031	0.00201387	0.118135	-1.42748
DOK2	0.19259	6.3117	3.16021	0.00201447	0.118135	-1.42773
LINC00665	-0.278065	5.39263	-3.16506	0.00198386	0.118135	-1.41474
KARS	-0.27821	8.30904	-3.16102	0.00200938	0.118135	-1.42558
POLG2	-0.362994	5.06187	-3.16121	0.00200816	0.118135	-1.42507
RARB	-0.369333	5.69607	-3.16684	0.00197278	0.118135	-1.40999
IQCB1	-0.381415	6.08717	-3.16418	0.00198938	0.118135	-1.4171
RPL39	-0.405218	7.2827	-3.16333	0.00199475	0.118135	-1.41938
SNORA80B	-0.451052	6.92922	-3.16176	0.00200466	0.118135	-1.42359
THSD7B	0.235091	4.50005	3.15777	0.00203006	0.118843	-1.43426
FANCD2	-0.32203	4.73641	-3.15688	0.00203574	0.118969	-1.43663
CYSLTR1	0.359396	4.69559	3.15411	0.00205361	0.119599	-1.44405
TDRP	-0.176533	6.47545	-3.15423	0.00205287	0.119599	-1.44374
CYP4X1	0.824147	6.29242	3.15231	0.00206528	0.120071	-1.44885
NFXL1	-0.302307	5.74727	-3.15146	0.00207082	0.120186	-1.45112
RPL6	-0.307244	10.1148	-3.15037	0.00207794	0.120279	-1.45403
TP53	-0.428044	7.82704	-3.15013	0.00207955	0.120279	-1.45469
VNN1	0.485162	4.11622	3.14656	0.00210304	0.120603	-1.46421
ZNF286B	-0.167925	5.95405	-3.14704	0.00209983	0.120603	-1.46291
GAREM	-0.313081	6.88768	-3.14837	0.00209107	0.120603	-1.45937
LTA4H	-0.358743	7.70645	-3.14703	0.0020999	0.120603	-1.46294
ANO1-AS1	-0.665222	7.00553	-3.14667	0.0021023	0.120603	-1.46391
SLC4A4	0.792614	5.19678	3.1458	0.00210805	0.120685	-1.46623
STX16	-0.198898	7.55624	-3.145	0.00211338	0.1207	-1.46837
LIN9	-0.201861	5.38669	-3.14468	0.00211548	0.1207	-1.46921
SPX	1.15292	6.41688	3.14161	0.00213604	0.121473	-1.47741
EIF5A2	0.301351	5.59754	3.14125	0.00213841	0.121473	-1.47835
TRIM59	-0.193709	4.0781	-3.1405	0.00214343	0.121473	-1.48034
ZNF33B	-0.552194	6.40298	-3.14085	0.0021411	0.121473	-1.47941
LIN37	0.164484	6.30601	3.13874	0.00215535	0.121944	-1.48503
RPL19P12	-0.238931	4.2187	-3.138	0.00216037	0.122023	-1.48701
ERGIC3	-0.221597	7.25464	-3.13684	0.00216821	0.122031	-1.49008
PHB2	-0.303371	8.5507	-3.13585	0.00217498	0.122031	-1.49272
SASS6	-0.337393	5.39882	-3.1363	0.00217189	0.122031	-1.49151
LPAR3	-0.479874	4.94116	-3.13714	0.00216624	0.122031	-1.4893
MIR4435-1HG	0.260502	5.92845	3.13342	0.00219163	0.122152	-1.49918
CTA-250D10.19	0.252441	4.31636	3.13441	0.00218486	0.122152	-1.49655
TMCO6	-0.149193	5.86832	-3.13368	0.00218986	0.122152	-1.49849
FRMD6	-0.477834	8.05465	-3.13471	0.00218276	0.122152	-1.49574
VIM-AS1	0.14928	4.32029	3.13201	0.00220136	0.122204	-1.50293
RNMTL1	-0.225674	6.29897	-3.13118	0.00220706	0.122204	-1.50512
PHLPP1	-0.306728	6.73982	-3.13204	0.00220117	0.122204	-1.50286
RP11-470P21.2	-0.421314	3.83792	-3.13168	0.00220361	0.122204	-1.50379
RPL13AP6	-0.334358	9.92746	-3.12961	0.00221796	0.122606	-1.50929
SPI1	0.168679	6.23272	3.12843	0.00222622	0.122861	-1.51244
TMEM178A	-0.310097	5.97169	-3.12681	0.00223754	0.122987	-1.51674
PABPC1	-0.335126	11.0873	-3.12757	0.00223219	0.122987	-1.51471
ZNF521	-0.357366	6.92794	-3.12654	0.00223944	0.122987	-1.51746
MFHAS1	0.186482	5.11057	3.12318	0.00226312	0.123684	-1.52637
LOC100505912	-0.148816	3.24936	-3.12342	0.00226142	0.123684	-1.52573
RAVER2	-0.380583	6.76093	-3.12317	0.00226314	0.123684	-1.52637
DKK1	0.385216	3.4179	3.11897	0.00229306	0.124063	-1.5375
EPB41L3	0.364179	7.40667	3.114	0.00232894	0.124063	-1.55064
SLC25A52	0.275801	4.99596	3.11402	0.00232886	0.124063	-1.55061
IL1RN	0.275411	4.14623	3.1208	0.00228002	0.124063	-1.53267
POLR1D	-0.139667	6.40715	-3.11707	0.00230676	0.124063	-1.54254
IGBP1P1	-0.163064	5.06667	-3.11609	0.0023138	0.124063	-1.54512
ABHD17B	-0.1824	6.84703	-3.11963	0.00228835	0.124063	-1.53575
KIFC1	-0.193421	6.09936	-3.11976	0.00228745	0.124063	-1.53542
SLC25A29	-0.220067	6.09865	-3.11745	0.00230398	0.124063	-1.54152
KLLN	-0.269129	4.35047	-3.11471	0.00232385	0.124063	-1.54879
STMN1	-0.291887	7.04509	-3.11755	0.00230326	0.124063	-1.54125
DTNB	-0.303115	6.39272	-3.11589	0.00231525	0.124063	-1.54565
SNORA70G	-0.307122	5.96593	-3.11499	0.00232177	0.124063	-1.54803
MTHFD2L	-0.30906	4.34536	-3.11654	0.00231058	0.124063	-1.54394
LOC100652914	-0.36504	8.63212	-3.11804	0.00229979	0.124063	-1.53998
CYP24A1	-0.866368	4.47419	-3.11429	0.00232687	0.124063	-1.54989
CD163	0.751469	7.16597	3.11295	0.00233666	0.124278	-1.55344
TRRAP	-0.227528	7.03397	-3.11158	0.00234666	0.124613	-1.55706
ARL2	0.257894	7.85365	3.1108	0.00235238	0.124721	-1.55912
HIST1H4K	-0.436846	8.15627	-3.10986	0.00235926	0.124889	-1.56159
TM6SF1	0.337523	6.2478	3.10848	0.00236946	0.125036	-1.56524
MACROD2-IT1	-0.190444	3.36883	-3.10851	0.00236923	0.125036	-1.56516
HIGD1A	0.323401	8.7209	3.10708	0.00237985	0.125206	-1.56894
CCDC71L	0.310123	5.90926	3.10562	0.00239066	0.125206	-1.57278
TANGO2	0.13561	6.76886	3.10508	0.00239469	0.125206	-1.57421
ZNF382	-0.195753	5.49054	-3.10666	0.00238295	0.125206	-1.57004
LRRC8D	-0.252071	6.03682	-3.10575	0.00238972	0.125206	-1.57245
SNORA5C	-0.432286	7.50936	-3.10505	0.00239496	0.125206	-1.5743
LMNA	0.265191	7.76735	3.10356	0.0024061	0.125206	-1.57823
PTRHD1	-0.14157	3.82403	-3.10395	0.00240315	0.125206	-1.57719
KRBOX4	-0.161631	6.19492	-3.10379	0.00240433	0.125206	-1.5776
PLD1	-0.286309	6.0827	-3.10087	0.00242632	0.12574	-1.58531
LDLRAD3	-0.290424	8.40375	-3.10126	0.00242336	0.12574	-1.58427
AC097713.3	-0.513282	4.83685	-3.10071	0.00242754	0.12574	-1.58573
LOC389641	-0.230571	6.34748	-3.09975	0.00243481	0.125881	-1.58826
AQP5	-0.477232	7.10012	-3.09936	0.00243772	0.125881	-1.58927
ACKR3	0.47161	6.12398	3.09731	0.00245331	0.12597	-1.59467
NNMT	0.42581	6.36859	3.09796	0.00244841	0.12597	-1.59298
ASIC1	-0.193819	5.425	-3.09762	0.00245101	0.12597	-1.59387
OIP5	-0.211024	3.07843	-3.09717	0.00245439	0.12597	-1.59504
RPS15	-0.326201	11.4089	-3.09657	0.00245902	0.126015	-1.59663
FCGR2B	0.604514	6.35499	3.0908	0.00250352	0.126568	-1.6118
S100A4	0.436784	6.24375	3.09132	0.00249947	0.126568	-1.61043
MRAP	0.375266	5.99655	3.09068	0.00250446	0.126568	-1.61212
FNDC4	0.235414	6.82901	3.09148	0.00249819	0.126568	-1.61
DDX31	-0.196074	5.39323	-3.09074	0.002504	0.126568	-1.61196
DANCR	-0.244818	5.55428	-3.0918	0.00249577	0.126568	-1.60918
REPS1	-0.270676	7.04846	-3.09074	0.00250397	0.126568	-1.61196
HOXA5	-0.380815	7.3901	-3.09218	0.00249275	0.126568	-1.60816
SNORD81	-0.392047	6.23717	-3.09149	0.00249811	0.126568	-1.60997
PTPRK	-0.494717	7.32425	-3.09002	0.00250961	0.126568	-1.61386
SHROOM3	-0.500429	6.51509	-3.08982	0.0025111	0.126568	-1.61436
ZBTB47	0.21689	6.74347	3.08894	0.00251798	0.126568	-1.61667
HIST1H1B	-0.321497	3.20551	-3.08886	0.00251861	0.126568	-1.61688
MARCKSL1	-0.286887	6.56118	-3.08652	0.00253702	0.127115	-1.62304
MSH2	-0.369537	7.17538	-3.08661	0.0025363	0.127115	-1.62281
EMB	0.606828	6.72575	3.08322	0.00256307	0.127796	-1.63168
OSR2	0.407995	6.23867	3.08194	0.00257332	0.127796	-1.63506
ZNF318	-0.145784	6.4856	-3.0835	0.00256089	0.127796	-1.63096
ACBD7	-0.191535	4.62576	-3.08266	0.00256754	0.127796	-1.63315
LINC00681	-0.211149	2.85726	-3.08147	0.00257704	0.127796	-1.63628
MATR3	-0.294562	8.2392	-3.08146	0.00257714	0.127796	-1.63631
PPAP2C	-0.578165	8.20243	-3.08191	0.00257355	0.127796	-1.63513
MS4A4A	0.803847	6.77708	3.06748	0.00269109	0.128086	-1.67288
CD68	0.562913	8.68189	3.07715	0.0026118	0.128086	-1.6476
FAM26E	0.545141	5.62426	3.07841	0.00260162	0.128086	-1.6443
HSPB8	0.50372	6.27182	3.07099	0.002662	0.128086	-1.66369
OSTM1	0.367384	5.83296	3.06586	0.00270454	0.128086	-1.67709
LOC728989	0.295242	5.35007	3.07114	0.00266079	0.128086	-1.66331
FEZ1	0.263518	5.48278	3.06625	0.00270129	0.128086	-1.67607
HMOX1	0.234365	6.53806	3.07499	0.00262932	0.128086	-1.65325
PLA1A	0.215037	3.7156	3.06724	0.00269307	0.128086	-1.6735
CD63	0.205279	8.84076	3.07799	0.00260496	0.128086	-1.64539
MGARP	0.199904	4.98974	3.07592	0.00262174	0.128086	-1.65081
RCVRN	0.197718	4.01821	3.06934	0.00267569	0.128086	-1.66803
RAB36	-0.149321	6.3149	-3.06663	0.00269817	0.128086	-1.6751
NFYC	-0.163923	6.9796	-3.07894	0.00259732	0.128086	-1.6429
PQBP1	-0.17464	7.20765	-3.07766	0.00260764	0.128086	-1.64626
ZSWIM5	-0.201042	5.76225	-3.07342	0.00264208	0.128086	-1.65735
RCC1	-0.213973	6.20657	-3.07157	0.0026573	0.128086	-1.6622
KAT7	-0.214934	6.8217	-3.07518	0.00262773	0.128086	-1.65274
TICRR	-0.219866	3.79967	-3.0699	0.00267099	0.128086	-1.66654
ICA1	-0.231672	6.19301	-3.07563	0.00262406	0.128086	-1.65156
PACSIN3	-0.232266	7.16577	-3.06771	0.00268919	0.128086	-1.67228
POLR1C	-0.240551	6.44354	-3.06945	0.00267478	0.128086	-1.66774
N4BP2L1	-0.254617	5.72895	-3.07054	0.00266573	0.128086	-1.66488
KLHDC3	-0.259965	7.64415	-3.06954	0.00267396	0.128086	-1.66748
LHFPL2	-0.324629	7.06978	-3.06623	0.00270151	0.128086	-1.67614
CMTM8	-0.353913	6.32502	-3.0667	0.00269759	0.128086	-1.67492
PPP1R9A	-0.361448	5.28652	-3.07542	0.00262581	0.128086	-1.65212
HIST1H2AK	-0.385126	4.0855	-3.06947	0.00267455	0.128086	-1.66767
RBMX	-0.419982	8.8643	-3.06753	0.00269067	0.128086	-1.67274
TRIM2	-0.433	6.72315	-3.07777	0.00260678	0.128086	-1.64598
LOC647264	-0.545548	6.70799	-3.07165	0.00265661	0.128086	-1.66198
SNORD4B	-0.628776	5.32156	-3.06618	0.00270192	0.128086	-1.67627
C16orf54	0.242406	5.9849	3.06323	0.00272664	0.128951	-1.68396
TPST2	0.216517	6.56261	3.06114	0.00274426	0.129241	-1.68941
ZC3H8	-0.287538	5.06303	-3.0615	0.00274125	0.129241	-1.68848
ZNF277	-0.36198	7.03495	-3.06169	0.00273962	0.129241	-1.68798
NEGR1	0.628643	6.53651	3.05989	0.00275489	0.129263	-1.69267
NRDE2	-0.13143	5.92394	-3.0605	0.00274971	0.129263	-1.69108
MSI1	-0.209605	5.97288	-3.05954	0.00275788	0.129263	-1.69359
LOC100652902	-0.321421	11.9572	-3.05928	0.00276006	0.129263	-1.69425
STAP2	-0.284035	6.69198	-3.05859	0.00276593	0.129358	-1.69605
VIPAS39	-0.203472	6.97847	-3.05681	0.00278121	0.129475	-1.7007
MIB1	-0.264822	7.44455	-3.05702	0.00277937	0.129475	-1.70014
PHF14	-0.321748	6.94115	-3.05561	0.00279146	0.129475	-1.70381
CCT3	-0.372751	8.25844	-3.05689	0.00278048	0.129475	-1.70048
KCTD3	-0.395233	7.94521	-3.05591	0.00278891	0.129475	-1.70303
KIAA1324	-1.39706	8.77865	-3.05636	0.00278501	0.129475	-1.70185
LRRN1	-0.462863	6.11423	-3.05476	0.00279877	0.129635	-1.70602
SRSF6	-0.422334	8.42173	-3.0516	0.00282621	0.130727	-1.71425
OPN3	-0.201544	5.69442	-3.05083	0.00283285	0.130855	-1.71624
ARHGAP30	0.148289	6.11801	3.04952	0.00284434	0.131152	-1.71965
KIAA1549	-0.239045	5.63817	-3.04921	0.00284706	0.131152	-1.72046
CRISPLD1	-0.785903	6.71481	-3.04862	0.00285223	0.13121	-1.72199
CXCR4	-0.552989	7.06696	-3.04605	0.00287486	0.132071	-1.72866
TNFSF13B	0.320943	5.2287	3.04494	0.00288463	0.132286	-1.73153
RGL2	-0.164455	7.0226	-3.04462	0.00288751	0.132286	-1.73237
ZNF776	-0.385847	6.46678	-3.04419	0.00289131	0.132286	-1.73348
CECR9	0.277429	3.89139	3.04292	0.00290263	0.132408	-1.73678
EXOG	0.119596	4.7611	3.04257	0.00290576	0.132408	-1.73769
UGT8	-0.577377	5.31722	-3.04294	0.00290249	0.132408	-1.73673
MED15P6	0.155321	6.77661	3.03999	0.00292884	0.132971	-1.74436
RPL41	-0.197369	6.01274	-3.03987	0.00292993	0.132971	-1.74468
ETV4	-0.279808	5.77429	-3.03998	0.00292896	0.132971	-1.7444
IMPDH1	0.18396	6.60296	3.03846	0.00294268	0.13337	-1.74834
BCL7A	-0.228245	6.82435	-3.03672	0.0029584	0.133544	-1.75284
MRPL45	-0.352109	7.46812	-3.03749	0.00295145	0.133544	-1.75085
PIK3C2G	-1.11909	6.22505	-3.0369	0.0029568	0.133544	-1.75238
XGY2	0.365418	5.77336	3.036	0.00296497	0.133662	-1.75471
POLR3D	-0.146075	6.83604	-3.03496	0.00297447	0.133911	-1.75741
MAP2K1	0.299114	7.37864	3.03329	0.00298974	0.133936	-1.76173
TSPAN15	0.290442	6.93883	3.03351	0.00298768	0.133936	-1.76115
PCID2	-0.212027	6.00053	-3.03426	0.00298078	0.133936	-1.7592
RNF169	-0.213287	7.6877	-3.03316	0.00299093	0.133936	-1.76206
RPL23	-0.190683	6.39042	-3.03254	0.00299659	0.133994	-1.76366
ANKZF1	-0.216018	5.80818	-3.03215	0.00300016	0.133994	-1.76466
CYP4Z2P	0.880901	5.00252	3.03058	0.00301462	0.133998	-1.76872
BVES	0.381957	5.96896	3.03053	0.00301514	0.133998	-1.76886
IL12RB2	0.300255	4.50876	3.03042	0.00301616	0.133998	-1.76915
STK40	0.231107	7.0425	3.03159	0.00300528	0.133998	-1.7661
SLC15A3	0.198988	6.76965	3.02979	0.00302198	0.13408	-1.77078
FANCF	-0.482809	6.19564	-3.02778	0.00304062	0.13473	-1.77596
TFAP2A	-0.557066	6.3706	-3.02607	0.00305659	0.13526	-1.78038
PMS2P3	-0.233533	8.05031	-3.02473	0.00306915	0.13534	-1.78384
RPL12P2	-0.327647	7.4475	-3.02463	0.00307004	0.13534	-1.78408
NET1	-0.355006	7.99641	-3.02456	0.00307074	0.13534	-1.78427
HIST1H3J	-0.369073	6.0947	-3.02416	0.00307444	0.13534	-1.78529
SLC6A6	0.200203	6.33574	3.02306	0.00308482	0.135606	-1.78813
NXN	-0.16162	6.36619	-3.02267	0.00308853	0.135606	-1.78915
C9orf152	-0.26597	5.63909	-3.02222	0.00309276	0.135615	-1.7903
PAMR1	0.468314	6.69028	3.01744	0.00313825	0.136019	-1.80261
LOC101927477	0.250519	4.26648	3.01892	0.00312412	0.136019	-1.79881
PYHIN1	0.217264	3.73705	3.01808	0.00313212	0.136019	-1.80096
HKR1	-0.196489	6.34616	-3.01969	0.00311681	0.136019	-1.79683
ANKRD17	-0.295396	8.36771	-3.01744	0.00313828	0.136019	-1.80262
EML5	-0.297879	4.02681	-3.01939	0.00311963	0.136019	-1.7976
SCGB3A1	-0.426683	6.80655	-3.01832	0.00312988	0.136019	-1.80036
OCLN	-0.576853	5.70732	-3.01885	0.00312482	0.136019	-1.799
COL6A6	-0.679767	7.05734	-3.0187	0.00312619	0.136019	-1.79937
ASTN2	-0.191029	5.50831	-3.01688	0.00314366	0.136024	-1.80406
SH3YL1	-0.53294	7.01177	-3.01659	0.00314647	0.136024	-1.80482
TTC25	0.165232	4.8737	3.01534	0.00315847	0.13621	-1.80803
TRIM24	-0.22157	7.07902	-3.0153	0.00315884	0.13621	-1.80813
RP11-252M21.7	0.22676	3.69892	3.01243	0.00318664	0.136536	-1.81551
LINC00901	0.212671	2.99088	3.01309	0.00318026	0.136536	-1.81382
NASP	-0.187426	6.57509	-3.01264	0.00318456	0.136536	-1.81496
HSPD1	-0.290305	7.40412	-3.01379	0.00317348	0.136536	-1.81202
HMGN1	-0.342711	7.34325	-3.01311	0.00318007	0.136536	-1.81377
TAGLN2	0.279377	8.33422	3.01096	0.00320096	0.136645	-1.81929
RPL35	-0.190202	10.0857	-3.01092	0.00320135	0.136645	-1.81939
ACP1	-0.311255	7.48087	-3.0111	0.00319956	0.136645	-1.81892
GUSBP4	-0.192733	6.59344	-3.00971	0.00321318	0.136804	-1.8225
GLTSCR2	-0.320654	9.03604	-3.00992	0.00321109	0.136804	-1.82195
SARM1	-0.151087	5.92568	-3.00675	0.00324236	0.137872	-1.83012
JMY	-0.255426	6.84644	-3.00625	0.0032473	0.137908	-1.8314
HOXC8	0.346305	5.00925	3.00485	0.0032611	0.138146	-1.83498
RPL21	-0.327251	9.20668	-3.00491	0.00326053	0.138146	-1.83483
GALNT12	0.446881	5.60992	3.00364	0.00327319	0.138311	-1.83809
LOC647859	-0.926702	6.88978	-3.00384	0.00327115	0.138311	-1.83757
SNORA9	-0.185688	5.27077	-3.00244	0.00328515	0.138643	-1.84117
UMPS	-0.209014	6.14801	-3.00037	0.00330592	0.139097	-1.84647
RFC4	-0.214352	5.09594	-3.00013	0.00330829	0.139097	-1.84708
RPS11	-0.258765	11.0392	-3.00019	0.00330771	0.139097	-1.84693
NUP62	-0.184459	7.42444	-2.99957	0.00331393	0.13916	-1.84851
MFAP4	0.661366	9.09864	2.99848	0.00332495	0.1392	-1.85131
MEA1	0.132059	6.72696	2.99825	0.00332727	0.1392	-1.8519
CPEB3	-0.294091	5.11434	-2.99903	0.00331941	0.1392	-1.84991
RASSF6	-0.656952	5.253	-2.99774	0.00333242	0.139243	-1.8532
RPS3AP47	-0.41282	9.62685	-2.99603	0.00334982	0.139797	-1.85759
CYGB	0.335006	7.68966	2.99477	0.00336263	0.14003	-1.8608
BAG3	0.263772	6.99764	2.99467	0.00336371	0.14003	-1.86107
KRTCAP3	-0.255487	5.78732	-2.99294	0.00338138	0.140421	-1.86548
CADM1	-0.277233	6.73567	-2.99294	0.00338143	0.140421	-1.8655
EFNA4	-0.31647	5.93599	-2.99155	0.00339567	0.140839	-1.86904
PDE7A	-0.51836	5.82512	-2.99015	0.00341015	0.141266	-1.87262
CCR1	0.431664	4.42311	2.98862	0.00342603	0.141749	-1.87653
GSTA4	-0.261375	6.41227	-2.98798	0.00343274	0.141853	-1.87818
TPTE2P1	-0.180392	5.09742	-2.98694	0.00344351	0.14195	-1.88082
LINC01060	-0.310697	4.54715	-2.98697	0.00344319	0.14195	-1.88074
EMBP1	0.555239	6.05894	2.98635	0.00344971	0.142032	-1.88233
CADM3	0.340328	6.20881	2.98499	0.003464	0.142134	-1.88581
C2orf68	-0.134339	6.92445	-2.98497	0.00346417	0.142134	-1.88585
VSNL1	-0.448466	6.30315	-2.98491	0.00346484	0.142134	-1.88601
STX19	-0.434099	4.19915	-2.98236	0.00349174	0.143064	-1.89252
CTNNB1	-0.371596	7.57761	-2.98159	0.00349983	0.143221	-1.89447
ZNF552	-0.499755	6.8938	-2.97976	0.00351927	0.143842	-1.89913
TMBIM1	0.325943	7.38088	2.97807	0.00353731	0.143918	-1.90343
PLCXD3	0.305479	5.08075	2.97864	0.00353121	0.143918	-1.90198
FOSL1	0.198883	5.8234	2.97794	0.0035387	0.143918	-1.90377
REREP3	-0.227581	7.32202	-2.97759	0.00354246	0.143918	-1.90466
C11orf1	-0.395751	6.44011	-2.97766	0.00354176	0.143918	-1.90449
CSF3R	0.197833	5.80475	2.97423	0.00357863	0.143945	-1.91321
CEBPG	0.170665	6.80279	2.97552	0.00356475	0.143945	-1.90994
DIS3L2	-0.102351	6.1684	-2.97556	0.00356433	0.143945	-1.90984
FUZ	-0.151273	7.21833	-2.97507	0.00356961	0.143945	-1.91108
C1orf226	-0.2149	5.79568	-2.97489	0.00357157	0.143945	-1.91155
NSMCE1	-0.226458	7.2694	-2.97406	0.0035805	0.143945	-1.91365
TCF7L2	-0.329913	6.58948	-2.97396	0.00358156	0.143945	-1.9139
RPS12P23	-0.338824	6.22079	-2.97692	0.00354961	0.143945	-1.90636
RHPN2	-0.562859	6.90183	-2.97482	0.00357232	0.143945	-1.91172
HIST1H2AJ	-0.228209	2.03304	-2.97261	0.00359618	0.144361	-1.91732
MRPS27	-0.226844	6.64014	-2.97072	0.00361684	0.144929	-1.92214
PRSS51	-0.42899	4.84155	-2.97053	0.00361893	0.144929	-1.92263
RCC2	-0.432909	8.46597	-2.96721	0.00365539	0.146215	-1.93106
LINC01128	0.303912	6.71106	2.96173	0.00371626	0.146484	-1.94495
LINC00152	0.282576	6.57798	2.96294	0.00370273	0.146484	-1.94188
FGF18	0.261859	6.41596	2.96393	0.00369173	0.146484	-1.93938
COX14	0.255206	6.13963	2.95941	0.00374231	0.146484	-1.95082
FAM149A	0.180671	5.92195	2.96126	0.00372159	0.146484	-1.94616
PARVB	0.161755	6.29537	2.96503	0.00367952	0.146484	-1.93659
CLK2	-0.162062	7.23682	-2.95846	0.00375307	0.146484	-1.95324
SFSWAP	-0.162993	7.36019	-2.96593	0.00366946	0.146484	-1.93429
SMO	-0.192724	6.44167	-2.96149	0.00371899	0.146484	-1.94557
MCM5	-0.204147	7.41488	-2.96039	0.00373128	0.146484	-1.94834
PRKCQ-AS1	-0.208386	3.56071	-2.96371	0.00369416	0.146484	-1.93993
FMN2	-0.21438	4.343	-2.95983	0.00373765	0.146484	-1.94977
AGPAT6	-0.241345	6.98841	-2.95943	0.00374213	0.146484	-1.95078
SNORA44	-0.252533	6.57835	-2.95908	0.00374609	0.146484	-1.95167
ETV5	-0.283921	5.99263	-2.96024	0.00373306	0.146484	-1.94874
AGAP1-IT1	-0.303787	4.88864	-2.96432	0.00368736	0.146484	-1.93838
ZNF462	-0.324481	7.94353	-2.95841	0.00375368	0.146484	-1.95337
RP1-45C12.1	-0.424652	4.48339	-2.96106	0.00372383	0.146484	-1.94666
DTL	-0.424724	4.25334	-2.96218	0.00371121	0.146484	-1.94381
TAF4B	-0.440453	5.59783	-2.9643	0.00368758	0.146484	-1.93843
HSD17B2	-0.54112	5.27685	-2.95805	0.00375768	0.146484	-1.95427
ESRP1	-0.742099	6.22619	-2.96245	0.00370821	0.146484	-1.94313
CHL1	0.560938	6.80244	2.95758	0.00376307	0.146525	-1.95547
LOC100132891	0.280397	5.41736	2.9557	0.00378439	0.146585	-1.96022
PSG4	0.277515	4.85887	2.95452	0.0037979	0.146585	-1.96322
TMEM18	-0.124654	7.01601	-2.95401	0.00380373	0.146585	-1.96451
LSM11	-0.171681	5.14157	-2.95651	0.00377518	0.146585	-1.95818
PSMB8	-0.172758	6.27043	-2.95608	0.00378006	0.146585	-1.95926
TRIM9	-0.173243	4.91268	-2.95425	0.00380102	0.146585	-1.96391
RPS14	-0.24081	6.34208	-2.95514	0.00379084	0.146585	-1.96165
ZNF26	-0.263049	5.42349	-2.95676	0.00377233	0.146585	-1.95754
SNRPEP4	-0.335554	7.45453	-2.95483	0.00379436	0.146585	-1.96244
URB1	-0.225078	6.6078	-2.95306	0.00381462	0.146837	-1.96691
MIR184	0.336412	4.19137	2.95246	0.00382146	0.146932	-1.96842
GPX2	0.225356	5.71285	2.95185	0.00382854	0.147002	-1.96997
TMCO4	-0.174373	7.08682	-2.95155	0.00383198	0.147002	-1.97073
FCGR2A	0.455264	7.20049	2.94545	0.00390286	0.147704	-1.98613
CTHRC1	0.391785	6.09709	2.94658	0.00388967	0.147704	-1.98329
MIR320C1	0.323712	3.8605	2.94654	0.0038901	0.147704	-1.98338
SPOCK3	0.116699	2.76654	2.94846	0.00386776	0.147704	-1.97854
IQCH-AS1	-0.123833	5.62103	-2.94561	0.00390095	0.147704	-1.98572
WDSUB1	-0.146756	6.19991	-2.94926	0.00385842	0.147704	-1.97651
TMEM106C	-0.2315	7.24519	-2.94578	0.00389903	0.147704	-1.9853
C2orf88	-0.240976	5.5114	-2.94892	0.00386237	0.147704	-1.97737
HIST1H2BN	-0.336567	3.92317	-2.9471	0.00388353	0.147704	-1.98196
NDRG2	-0.353293	8.44994	-2.94738	0.00388027	0.147704	-1.98125
APELA	-0.410982	3.6296	-2.94777	0.00387574	0.147704	-1.98027
MIR492	-0.587014	6.20305	-2.94799	0.00387316	0.147704	-1.97971
PDE8B	0.528639	5.70654	2.94292	0.00393257	0.148606	-1.9925
HIST1H2AM	-0.32692	3.15158	-2.94267	0.0039355	0.148606	-1.99313
SPIN4	-0.323043	5.27263	-2.94066	0.0039593	0.149263	-1.99819
PRIM1	-0.33979	5.21243	-2.94046	0.00396175	0.149263	-1.99871
SPATS2	-0.193924	6.46668	-2.93909	0.00397802	0.149542	-2.00215
IGF1R	-0.273736	6.00037	-2.93929	0.00397567	0.149542	-2.00166
LTBP2	0.370691	7.65345	2.93827	0.00398778	0.149742	-2.00421
DNAJC12	-0.476527	4.80499	-2.93768	0.00399489	0.149842	-2.00571
GIPC3	0.218475	6.08763	2.93665	0.00400728	0.150139	-2.00831
TMTC2	-0.246268	5.59495	-2.93625	0.00401206	0.150152	-2.00931
S100A8	0.331241	5.22488	2.9355	0.00402111	0.150324	-2.0112
ZNF572	-0.230842	4.83199	-2.93382	0.0040413	0.150593	-2.01541
PAPSS1	-0.354034	7.79837	-2.934	0.00403913	0.150593	-2.01496
STRBP	-0.384382	5.67849	-2.93379	0.00404172	0.150593	-2.0155
SGCG	0.664042	4.62181	2.93106	0.00407489	0.151371	-2.02236
LAIR1	0.337774	6.521	2.93096	0.00407607	0.151371	-2.0226
ZNF812	-0.298783	5.10156	-2.93126	0.0040724	0.151371	-2.02185
TTTY3B	0.198427	2.73848	2.92961	0.00409259	0.151684	-2.026
LOC101927667	-0.175081	4.52763	-2.92954	0.00409348	0.151684	-2.02618
STX2	0.363686	6.83133	2.92683	0.00412681	0.152583	-2.03299
OAT	-0.4082	7.58457	-2.92712	0.00412323	0.152583	-2.03226
EYA4	0.216116	2.76699	2.92572	0.00414046	0.152586	-2.03576
USP46-AS1	0.198143	4.90587	2.92608	0.00413601	0.152586	-2.03486
TC2N	-0.719642	8.35058	-2.92627	0.00413374	0.152586	-2.0344
KLRF1	0.173945	2.80698	2.92241	0.00418164	0.153634	-2.04407
RACGAP1	-0.20279	5.24661	-2.92234	0.00418255	0.153634	-2.04425
HIST1H4B	-0.385506	3.8172	-2.92272	0.00417781	0.153634	-2.0433
GZMB	0.195017	5.1454	2.91935	0.00422001	0.154841	-2.05173
TMEM100	0.638996	5.88791	2.91755	0.00424271	0.155504	-2.05623
FCGR1C	0.24253	3.97202	2.91478	0.0042779	0.155628	-2.06317
CD33	0.176306	5.19879	2.91402	0.00428763	0.155628	-2.06507
PPTC7	0.173533	6.86467	2.91645	0.00425666	0.155628	-2.05899
RPS4X	-0.226989	8.36218	-2.91454	0.00428098	0.155628	-2.06377
RPL35A	-0.229328	5.75209	-2.91464	0.0042797	0.155628	-2.06352
GPR27	-0.254378	6.02447	-2.91616	0.0042604	0.155628	-2.05973
RPL41P2	-0.315136	11.6507	-2.91435	0.00428339	0.155628	-2.06424
PRLR	-0.867868	7.12222	-2.91505	0.00427445	0.155628	-2.06249
CD24	-0.976725	7.93219	-2.91403	0.00428754	0.155628	-2.06505
SAA4	0.515676	4.84438	2.91318	0.0042984	0.155691	-2.06718
SNHG12	-0.254784	6.4285	-2.91316	0.0042986	0.155691	-2.06722
DNAL1	0.192417	5.01214	2.91264	0.00430523	0.155764	-2.06851
FADS3	0.44301	7.0274	2.91185	0.00431539	0.155798	-2.07049
CPPED1	0.262655	6.79487	2.91196	0.00431403	0.155798	-2.07022
ANKRD62P1-PARP4P3	-0.249821	3.65732	-2.91083	0.00432858	0.15594	-2.07305
NEDD4L	-0.469566	6.29497	-2.91096	0.00432684	0.15594	-2.07271
CTTNBP2	0.186418	5.23925	2.90948	0.00434597	0.155983	-2.07641
PPP1R13B	-0.158736	7.00153	-2.9093	0.00434828	0.155983	-2.07685
MAGED4	-0.209669	6.60888	-2.90952	0.00434542	0.155983	-2.0763
GRAMD1C	-0.412478	4.95319	-2.90979	0.00434193	0.155983	-2.07563
HMGB2	-0.222464	7.18199	-2.90763	0.00437001	0.156596	-2.08104
MIR3973	-0.240907	3.85332	-2.90601	0.00439104	0.157035	-2.08506
PLOD1	-0.253402	7.81009	-2.90597	0.00439158	0.157035	-2.08517
CLEC3B	0.385525	7.2676	2.90439	0.00441224	0.157109	-2.0891
MOB3C	0.154717	6.63062	2.90504	0.00440374	0.157109	-2.08748
TNKS	-0.201455	6.13906	-2.90442	0.00441194	0.157109	-2.08904
SOX10	-0.295556	6.51624	-2.90439	0.00441229	0.157109	-2.08911
LPHN2	-0.261297	6.86497	-2.90338	0.00442554	0.157415	-2.09163
CYP2B6	0.295923	4.86767	2.90288	0.00443212	0.157483	-2.09287
AC008440.5	0.461174	6.31725	2.90237	0.0044389	0.157558	-2.09415
LOC101930114	0.513486	5.12368	2.90126	0.00445348	0.157671	-2.0969
RP11-147C23.1	0.151695	2.57571	2.90073	0.00446058	0.157671	-2.09824
LOC440434	-0.292246	7.27373	-2.90062	0.00446196	0.157671	-2.0985
ITPR2	-0.538183	8.09665	-2.90062	0.00446201	0.157671	-2.09851
ANO1	-0.732593	8.46791	-2.90036	0.00446547	0.157671	-2.09915
EPB41L4A-AS1	-0.388671	7.45774	-2.89923	0.00448051	0.158003	-2.10197
SYCP2	-0.638244	5.06645	-2.89894	0.00448426	0.158003	-2.10268
GPR85	0.134346	2.87923	2.89822	0.0044939	0.158178	-2.10448
ANO5	0.321442	3.49009	2.89768	0.00450116	0.158268	-2.10583
ALKBH2	-0.27415	6.55762	-2.89663	0.0045151	0.158593	-2.10842
IGBP1	-0.265953	7.91872	-2.89547	0.0045308	0.158979	-2.11133
CD209	0.596079	6.88337	2.89486	0.00453892	0.159098	-2.11283
THAP9	-0.183162	4.4297	-2.89385	0.00455261	0.159252	-2.11536
EIF4B	-0.280293	10.0226	-2.89384	0.00455275	0.159252	-2.11538
LINC00930	0.175083	3.68326	2.89334	0.00455952	0.159323	-2.11663
CYP4B1	0.468468	5.7287	2.89113	0.00458941	0.159447	-2.1221
DPYD-AS2	0.15474	2.26917	2.89214	0.0045757	0.159447	-2.1196
AC009313.1	-0.209085	2.58471	-2.89029	0.0046009	0.159447	-2.1242
RNU5F-3P	-0.2758	2.40898	-2.8906	0.00459661	0.159447	-2.12342
PUM2	-0.314065	8.41159	-2.89165	0.00458241	0.159447	-2.12082
TUSC8	-0.352211	5.84944	-2.89229	0.00457361	0.159447	-2.11921
KIAA0020	-0.353684	6.5278	-2.89061	0.00459645	0.159447	-2.12339
TARBP1	-0.375837	5.33762	-2.89164	0.00458247	0.159447	-2.12083
MID1	-0.234572	5.51848	-2.88953	0.00461119	0.15964	-2.12607
RP11-103C3.1	0.178505	2.92232	2.88857	0.00462431	0.15993	-2.12845
HAS2	0.88212	6.33789	2.88781	0.00463477	0.159964	-2.13034
RBMX2	-0.153054	6.98175	-2.88791	0.00463334	0.159964	-2.13009
PREB	0.180907	7.24348	2.88704	0.00464532	0.16	-2.13225
ACAD10	-0.12732	5.83012	-2.88714	0.00464395	0.16	-2.132
SLC31A2	0.305593	6.90047	2.88607	0.00465877	0.160212	-2.13467
SERPINB1	0.258376	7.46252	2.88591	0.00466096	0.160212	-2.13506
KIAA1804	-0.247499	5.11784	-2.88344	0.00469508	0.16122	-2.14117
AC093326.2	0.267283	3.37977	2.88135	0.00472417	0.161285	-2.14635
NFRKB	-0.154091	6.67252	-2.88119	0.0047265	0.161285	-2.14676
SND1	-0.237354	8.53817	-2.88159	0.00472084	0.161285	-2.14576
GTF3C4	-0.260672	6.61957	-2.88135	0.00472423	0.161285	-2.14636
ZNF121	-0.318055	7.17409	-2.8809	0.00473045	0.161285	-2.14746
FGFR2	-0.364016	6.27302	-2.88141	0.00472339	0.161285	-2.14621
SDR42E1	-0.369279	5.59258	-2.88278	0.00470435	0.161285	-2.14283
LINC00888	0.141362	5.27333	2.88002	0.00474289	0.161383	-2.14966
CSNK1E	-0.128911	7.50753	-2.8803	0.00473885	0.161383	-2.14895
ANGPTL5	0.970185	3.48541	2.8777	0.00477548	0.161841	-2.15539
TNMD	0.630511	4.87753	2.8757	0.00480378	0.161841	-2.16034
KCNB1	0.361026	6.10719	2.87489	0.00481526	0.161841	-2.16234
C1QB	0.356622	6.9793	2.87435	0.00482297	0.161841	-2.16368
LILRB3	0.183654	6.05163	2.87834	0.00476641	0.161841	-2.1538
IL6R	0.174386	5.9988	2.87664	0.00479045	0.161841	-2.15802
ZNF317	-0.188443	6.64232	-2.87431	0.00482356	0.161841	-2.16378
WARS2	-0.21538	6.42607	-2.87585	0.0048016	0.161841	-2.15996
UXT	-0.24382	6.13466	-2.8759	0.00480096	0.161841	-2.15985
RTCA-AS1	-0.255986	4.85476	-2.87436	0.00482277	0.161841	-2.16365
HIST1H3C	-0.308796	2.94531	-2.87439	0.00482229	0.161841	-2.16356
PRPS2	-0.401992	7.64027	-2.87779	0.00477424	0.161841	-2.15518
LOC100653061	-0.450257	7.53153	-2.87517	0.00481126	0.161841	-2.16165
MYBPC1	-0.808437	5.14327	-2.87647	0.00479279	0.161841	-2.15843
EFHD1	-0.378173	7.147	-2.8735	0.00483499	0.162063	-2.16577
ADAM22	0.266592	4.55765	2.87273	0.00484609	0.162113	-2.16769
BCL2L11	-0.227791	5.6042	-2.87281	0.00484488	0.162113	-2.16748
GMPS	-0.285585	7.78044	-2.8721	0.00485505	0.162252	-2.16923
CRIP1P4	0.437489	6.63347	2.86745	0.00492207	0.162266	-2.18071
ANXA1	0.434744	9.81097	2.86815	0.00491188	0.162266	-2.17897
SLC37A2	0.254346	6.03975	2.86673	0.00493245	0.162266	-2.18247
SLC29A1	0.235469	7.49993	2.86899	0.00489981	0.162266	-2.17691
AC009492.1	0.206773	3.51051	2.86994	0.00488604	0.162266	-2.17456
QDPR	0.164005	5.06915	2.8675	0.00492137	0.162266	-2.18059
LRR1	0.120017	4.87933	2.86911	0.00489797	0.162266	-2.1766
MRPL51	-0.133067	7.79145	-2.87065	0.00487589	0.162266	-2.17282
HIST3H2A	-0.305803	5.73562	-2.8686	0.0049054	0.162266	-2.17787
WDR3	-0.322701	6.80909	-2.87137	0.00486555	0.162266	-2.17104
BARX2	-0.343866	6.72738	-2.86698	0.00492886	0.162266	-2.18186
HIST1H4D	-0.345232	7.50999	-2.86987	0.00488711	0.162266	-2.17474
NFIB	-0.348387	9.59886	-2.86692	0.0049297	0.162266	-2.182
LRBA	-0.427865	7.37396	-2.8683	0.00490974	0.162266	-2.17861
ARRDC3	-0.53874	8.98002	-2.8687	0.00490401	0.162266	-2.17763
LOC100505851	-0.834329	4.74349	-2.86815	0.00491189	0.162266	-2.17898
MIR22HG	0.404752	6.72437	2.86556	0.00494951	0.162329	-2.18536
TDP1	-0.23742	6.18546	-2.86528	0.00495365	0.162329	-2.18606
RPL15	-0.238772	7.61936	-2.86547	0.00495091	0.162329	-2.1856
CHD7	-0.255798	5.98388	-2.8656	0.0049489	0.162329	-2.18526
SNRNP200	-0.236424	8.2496	-2.86453	0.0049646	0.162373	-2.18791
TPT1-AS1	-0.262053	5.69626	-2.86473	0.00496158	0.162373	-2.1874
LRRC4C	0.211317	4.31782	2.86413	0.00497048	0.162408	-2.1889
RP11-305P22.5	0.184428	6.25854	2.86314	0.00498489	0.162563	-2.19132
TP53I11	0.127268	6.80993	2.86345	0.00498036	0.162563	-2.19056
ALDOC	0.586686	6.8762	2.86201	0.00500153	0.162842	-2.19411
HN1	-0.192087	5.86832	-2.8619	0.00500308	0.162842	-2.19437
RP11-5N11.5	0.176954	2.4465	2.86125	0.00501275	0.162999	-2.19598
CRHBP	0.589825	5.53843	2.86047	0.00502429	0.16306	-2.19791
HCG18	-0.169094	6.22325	-2.86076	0.00502	0.16306	-2.19719
RPS2P45	-0.185866	4.15636	-2.85977	0.00503458	0.163182	-2.19962
PDE4B	-0.52121	6.27283	-2.85956	0.00503773	0.163182	-2.20014
PODXL2	-0.200459	6.70864	-2.85879	0.00504917	0.163395	-2.20204
ZNF146	-0.326968	8.04078	-2.85777	0.00506429	0.163728	-2.20454
TPSB2	0.292691	7.28533	2.85691	0.00507712	0.163962	-2.20666
B3GALT1	-0.374192	4.54034	-2.85663	0.00508126	0.163962	-2.20734
LOC729950	0.228638	2.82153	2.8557	0.00509511	0.164252	-2.20962
ELN	0.396701	7.6374	2.85485	0.00510785	0.164392	-2.21171
LILRA2	0.155838	5.45936	2.85459	0.00511186	0.164392	-2.21236
LOC728715	-0.216452	3.55667	-2.85444	0.00511409	0.164392	-2.21273
CIRBP	-0.284256	9.81106	-2.85308	0.00513457	0.164893	-2.21607
MRPL37	-0.211789	7.28703	-2.85239	0.00514502	0.165071	-2.21777
XIRP2-AS1	0.211391	2.70029	2.85132	0.00516116	0.165231	-2.22039
CC2D1B	0.109479	6.22604	2.85098	0.00516627	0.165231	-2.22122
C1orf174	-0.143003	6.1444	-2.85076	0.00516961	0.165231	-2.22176
PTHLH	-0.935435	5.26252	-2.8517	0.00515531	0.165231	-2.21944
NEXN	0.495496	6.62425	2.84873	0.00520044	0.165786	-2.22673
CTDSPL	-0.195608	7.26311	-2.84865	0.00520171	0.165786	-2.22694
ATAD2	-0.338902	5.4804	-2.84903	0.00519592	0.165786	-2.226
NAT10	-0.2254	6.99853	-2.84739	0.00522095	0.166242	-2.23002
FCGR3B	0.320474	5.79757	2.84675	0.00523084	0.166305	-2.2316
NT5C2	-0.291277	7.26284	-2.84662	0.00523278	0.166305	-2.23191
KIAA1841	0.146223	5.17176	2.84618	0.00523951	0.166309	-2.23299
RPS25	-0.252641	9.41723	-2.84597	0.00524279	0.166309	-2.23351
TTC17	-0.277529	8.07455	-2.8454	0.00525145	0.166428	-2.23489
LOC100506013	-0.499503	3.37781	-2.84497	0.00525816	0.166484	-2.23596
CCDC171	-0.173895	4.79648	-2.8432	0.00528547	0.166947	-2.24029
NBAS	-0.243082	7.00205	-2.84362	0.00527903	0.166947	-2.23927
HIST1H3H	-0.318675	4.45219	-2.84242	0.00529755	0.166947	-2.2422
HIST1H2BK	-0.430765	8.43882	-2.84256	0.00529531	0.166947	-2.24185
GUSBP9	-0.468453	7.68171	-2.84292	0.00528984	0.166947	-2.24098
CLDN3	-0.646664	8.6697	-2.84116	0.00531714	0.167408	-2.24528
MMS19	-0.159619	6.35249	-2.84038	0.00532927	0.167548	-2.24719
EID2B	-0.199974	4.12116	-2.84024	0.00533151	0.167548	-2.24754
RP11-398K22.12	-0.146813	5.63883	-2.83967	0.00534043	0.167668	-2.24894
ANKRD18A	-0.285288	4.66961	-2.83936	0.00534528	0.167668	-2.2497
SYTL4	0.382532	6.28417	2.8367	0.00538698	0.167675	-2.25619
MZF1	-0.167705	5.7513	-2.83649	0.00539026	0.167675	-2.2567
MAPKAPK5-AS1	-0.189249	5.79969	-2.8373	0.00537747	0.167675	-2.25471
ZNF551	-0.243463	5.53734	-2.83627	0.00539377	0.167675	-2.25724
HIST1H2AI	-0.25637	4.09817	-2.83621	0.00539469	0.167675	-2.25739
ALX4	-0.269924	6.24276	-2.83618	0.00539523	0.167675	-2.25747
LOC101929689	-0.285538	5.3447	-2.83864	0.00535653	0.167675	-2.25145
ADAMTS9-AS2	-0.376124	6.28517	-2.83655	0.00538928	0.167675	-2.25655
VDR	-0.39905	6.63582	-2.8381	0.00536492	0.167675	-2.25276
HIST1H2AE	-0.827383	7.53061	-2.83797	0.00536697	0.167675	-2.25308
ACKR1	0.427224	6.15351	2.83578	0.00540148	0.167715	-2.25844
HPGDS	0.577125	5.78789	2.83412	0.00542768	0.168373	-2.26248
PDZRN4	0.588576	3.89625	2.83297	0.00544603	0.168632	-2.2653
CADM2	0.4565	3.88726	2.83305	0.00544481	0.168632	-2.26511
MILR1	0.217585	5.63627	2.83185	0.00546379	0.168759	-2.26802
TADA1	-0.179716	5.42225	-2.83177	0.00546514	0.168759	-2.26823
RP11-981G7.1	-0.185845	2.27881	-2.83185	0.0054639	0.168759	-2.26804
VANGL2	-0.233627	6.27506	-2.83139	0.00547125	0.168793	-2.26916
MAU2	-0.116652	6.90164	-2.83048	0.00548577	0.169086	-2.27137
SLC7A10	0.361281	6.32635	2.82882	0.00551241	0.169175	-2.27542
SF3A2	-0.180329	8.05715	-2.82842	0.00551876	0.169175	-2.27638
EIF3J-AS1	-0.183384	6.33352	-2.82862	0.00551561	0.169175	-2.2759
SFMBT2	-0.299891	5.93148	-2.82934	0.00550403	0.169175	-2.27415
GRAMD3	-0.453472	6.65655	-2.82918	0.00550662	0.169175	-2.27454
BAMBI	-0.478929	6.43724	-2.82883	0.00551229	0.169175	-2.2754
SMPD1	0.180189	6.76694	2.82714	0.00553951	0.169657	-2.27952
MRPL45P2	-0.264812	5.81738	-2.82605	0.00555715	0.170043	-2.28217
SIPA1L2	-0.216549	6.71984	-2.82566	0.00556342	0.17008	-2.28311
SYNPO	0.312251	6.76685	2.82489	0.00557599	0.17031	-2.285
LCMT1	-0.213609	6.98788	-2.82401	0.00559022	0.170469	-2.28713
ZNF502	-0.2322	4.9309	-2.82395	0.0055913	0.170469	-2.28729
HIST2H4B	-0.495488	6.02041	-2.82348	0.00559894	0.170548	-2.28843
C1R	0.406806	8.35838	2.82276	0.0056107	0.170598	-2.29018
HIST2H2BA	-0.227652	4.3175	-2.82288	0.00560869	0.170598	-2.28988
NCF2	0.364768	5.56847	2.82111	0.00563775	0.170687	-2.2942
CST3	0.353036	9.02051	2.81999	0.00565615	0.170687	-2.29692
STAB1	0.325928	6.99951	2.81635	0.00571632	0.170687	-2.30575
LDHA	0.31619	9.11839	2.81955	0.0056634	0.170687	-2.29799
AAED1	0.313718	7.28318	2.82146	0.005632	0.170687	-2.29334
KCND3	0.29204	6.03804	2.8168	0.00570889	0.170687	-2.30466
ACOT9	0.238251	6.06243	2.81968	0.00566117	0.170687	-2.29766
RP11-763F8.1	0.234397	3.13822	2.81941	0.00566573	0.170687	-2.29833
STEAP1B	0.230841	5.00848	2.81718	0.00570252	0.170687	-2.30373
ALOX5	0.22285	6.82223	2.81718	0.00570259	0.170687	-2.30374
LINC00906	0.200717	2.98202	2.81627	0.00571771	0.170687	-2.30595
WAS	0.133747	6.19273	2.82067	0.00564492	0.170687	-2.29526
EIF3B	-0.193949	6.91573	-2.82071	0.00564432	0.170687	-2.29517
RPL10	-0.212452	7.06858	-2.81858	0.00567939	0.170687	-2.30034
SNRPA	-0.250455	7.84435	-2.8182	0.00568564	0.170687	-2.30126
MMS22L	-0.255955	4.29554	-2.81822	0.00568534	0.170687	-2.30121
ILF2	-0.290608	8.35469	-2.81685	0.00570798	0.170687	-2.30453
TPD52	-0.337669	5.18691	-2.8202	0.00565261	0.170687	-2.29639
GAS5	-0.372754	6.03758	-2.81614	0.00571993	0.170687	-2.30628
GPR174	-0.856729	4.80955	-2.82175	0.00562726	0.170687	-2.29264
CCL28	-1.03258	8.11187	-2.8163	0.00571712	0.170687	-2.30587
ZNF404	-0.348693	4.29892	-2.81553	0.0057301	0.170839	-2.30776
TRIM4	-0.178643	6.45559	-2.81479	0.00574228	0.171051	-2.30953
RP2	0.217052	6.6577	2.814	0.00575564	0.171146	-2.31147
FAT2	-0.433912	6.45891	-2.81406	0.00575454	0.171146	-2.31131
FCGR1A	0.292181	3.8069	2.81329	0.00576739	0.171338	-2.31317
PMPCB	-0.291852	7.25403	-2.8127	0.00577731	0.171338	-2.31461
KRT19	-0.927301	8.6213	-2.81294	0.00577333	0.171338	-2.31403
HCAR3	0.428763	5.40434	2.81141	0.00579906	0.171384	-2.31774
GALNT13	0.393079	3.65648	2.80833	0.00585116	0.171384	-2.32521
TCN2	0.268926	6.30311	2.81021	0.00581939	0.171384	-2.32066
PDGFB	0.175391	6.14175	2.80977	0.00582677	0.171384	-2.32172
CD40	0.131626	5.7759	2.8111	0.00580433	0.171384	-2.3185
IL12A	-0.151118	3.35912	-2.81012	0.00582087	0.171384	-2.32088
FZD10-AS1	-0.153497	5.56622	-2.80819	0.0058535	0.171384	-2.32554
PMS2CL	-0.176616	6.29849	-2.81192	0.00579047	0.171384	-2.31651
SMARCA4	-0.206336	7.43282	-2.80988	0.0058249	0.171384	-2.32145
BDH1	-0.215795	5.72115	-2.8081	0.0058551	0.171384	-2.32577
TMEM98	-0.220209	7.58601	-2.81111	0.00580408	0.171384	-2.31847
GUSBP1	-0.246664	6.82683	-2.80886	0.00584212	0.171384	-2.32392
AC092168.2	-0.27933	4.04198	-2.8097	0.0058279	0.171384	-2.32188
ZNF749	-0.304269	5.06394	-2.80881	0.00584304	0.171384	-2.32405
CXCL13	-1.81449	4.67313	-2.80909	0.0058383	0.171384	-2.32337
TCEAL2	0.201901	4.84703	2.80685	0.00587627	0.171854	-2.32878
LOC158434	-0.289998	4.55794	-2.80593	0.00589208	0.172167	-2.33102
AHNAK2	0.537374	7.6091	2.8048	0.00591149	0.172311	-2.33376
BST1	0.328567	5.6451	2.80445	0.00591745	0.172311	-2.3346
BTC	0.240745	4.19417	2.80455	0.00591574	0.172311	-2.33436
IRX2	-0.351829	6.96097	-2.80516	0.00590528	0.172311	-2.33289
BOD1	-0.158899	5.82919	-2.80408	0.00592373	0.172345	-2.33549
KHDRBS3	0.199215	5.46301	2.80129	0.00597184	0.172554	-2.34224
SRGAP3-AS1	0.196853	4.51337	2.80153	0.00596777	0.172554	-2.34167
MICAL3	-0.122926	6.76873	-2.80268	0.00594793	0.172554	-2.33889
CREBBP	-0.22044	8.88472	-2.80189	0.00596147	0.172554	-2.34079
LOC101929709	-0.249182	4.34867	-2.80319	0.00593904	0.172554	-2.33764
FRAT2	-0.274419	6.67112	-2.80243	0.00595223	0.172554	-2.33949
SMA4	-0.471608	7.73819	-2.80306	0.00594132	0.172554	-2.33796
KIT	-1.12678	9.30131	-2.80152	0.00596788	0.172554	-2.34168
NOV	0.500053	6.66863	2.79963	0.00600064	0.17309	-2.34625
TK2	0.230391	6.36609	2.79974	0.00599879	0.17309	-2.34599
ATP13A5	-0.86077	5.1184	-2.79836	0.00602277	0.173579	-2.34932
STK10	0.136613	6.64343	2.79762	0.00603579	0.173806	-2.35112
TRPS1	-0.846912	8.55999	-2.79716	0.00604381	0.173888	-2.35223
P2RY12	0.392871	3.72452	2.79656	0.00605432	0.173894	-2.35368
GID8	-0.217575	6.99412	-2.79663	0.00605304	0.173894	-2.3535
RP11-38H17.1	0.409749	4.91133	2.79495	0.00608257	0.174315	-2.35756
PCSK5	0.315499	5.91634	2.79531	0.00607616	0.174315	-2.35668
LOC389831	-0.556398	5.76096	-2.79484	0.00608448	0.174315	-2.35782
USB1	0.136891	6.05354	2.79397	0.00609978	0.174425	-2.35991
LOC101927045	-0.201772	5.45589	-2.79374	0.00610385	0.174425	-2.36047
THSD4	-0.610116	6.82131	-2.79376	0.00610345	0.174425	-2.36041
TENM2	-0.286807	5.7803	-2.79302	0.00611655	0.17464	-2.3622
CYP2B7P	0.536455	5.37184	2.79252	0.00612544	0.174746	-2.36341
RP11-526P5.2	0.134193	2.79346	2.79195	0.00613552	0.174886	-2.36478
SLC25A6	-0.291312	9.82656	-2.7912	0.00614886	0.175118	-2.36659
PMEPA1	0.435055	6.46669	2.79003	0.00616968	0.175203	-2.36941
TVP23C	-0.211941	5.98238	-2.78987	0.00617262	0.175203	-2.36981
E2F5	-0.245693	4.36872	-2.79066	0.0061585	0.175203	-2.3679
TIFA	-0.377803	5.80255	-2.79006	0.00616914	0.175203	-2.36934
LOC101927043	-0.119706	4.66846	-2.78861	0.00619512	0.175504	-2.37284
ABCA13	-0.203402	3.72487	-2.78875	0.00619246	0.175504	-2.37248
GABPB1-AS1	-0.27925	5.11481	-2.7884	0.00619885	0.175504	-2.37334
LIMCH1	0.369074	6.7929	2.78699	0.00622418	0.175664	-2.37674
AC010082.2	0.216225	4.4082	2.78636	0.00623537	0.175664	-2.37824
ITGAX	0.175926	5.98705	2.78656	0.0062319	0.175664	-2.37777
ZNF714	-0.239029	6.47586	-2.78643	0.00623413	0.175664	-2.37807
HS3ST4	-0.276833	5.39483	-2.78769	0.00621151	0.175664	-2.37504
XRCC2	-0.307542	4.4677	-2.78634	0.00623577	0.175664	-2.37829
DPH5	-0.223675	5.62926	-2.78556	0.00624989	0.175915	-2.38018
FCGR2C	0.556857	7.30102	2.78374	0.00628273	0.176229	-2.38454
PODN	0.536702	8.6144	2.78231	0.0063088	0.176229	-2.38799
LGR5	0.408319	4.1588	2.78149	0.00632373	0.176229	-2.38996
PGA4	0.272545	5.33585	2.78307	0.00629498	0.176229	-2.38617
SNORD115-26	-0.0944656	5.40019	-2.7812	0.006329	0.176229	-2.39066
LOC101927550	-0.14094	5.57477	-2.78123	0.00632836	0.176229	-2.39057
PPIAL4G	-0.157301	3.73459	-2.78436	0.00627149	0.176229	-2.38305
ST6GAL2	-0.165114	5.59752	-2.78151	0.00632332	0.176229	-2.38991
ZNF605	-0.184015	5.56493	-2.78126	0.00632789	0.176229	-2.39051
OSBP	-0.200941	8.33776	-2.78122	0.00632853	0.176229	-2.39059
TAF1D	-0.335487	6.08243	-2.78433	0.00627214	0.176229	-2.38314
CDK6	-0.35621	6.93673	-2.78314	0.00629367	0.176229	-2.38599
ATP6V0A4	-0.450819	5.50553	-2.78306	0.00629518	0.176229	-2.38619
ADAM9	0.396633	8.20849	2.77968	0.00635672	0.176608	-2.3943
RNU11-6P	-0.281627	4.93901	-2.77974	0.00635573	0.176608	-2.39417
SNORA74A	-1.27355	7.21292	-2.77959	0.00635832	0.176608	-2.39451
EFCAB11	-0.119977	3.63969	-2.77908	0.00636774	0.176724	-2.39574
CCDC80	0.68995	9.79997	2.77671	0.00641143	0.176832	-2.40144
CLIP1	0.287968	8.01017	2.77711	0.00640404	0.176832	-2.40048
NTM	0.281505	6.16179	2.7777	0.00639315	0.176832	-2.39906
ZNF423	0.269683	6.29072	2.77705	0.00640507	0.176832	-2.40061
COPS7B	-0.096185	5.68092	-2.77659	0.00641356	0.176832	-2.40171
KIAA0895	-0.188819	4.16521	-2.77783	0.00639069	0.176832	-2.39874
VPS51	-0.232192	6.97683	-2.77702	0.00640574	0.176832	-2.4007
EEF1B2P1	-0.324913	5.11824	-2.77738	0.00639894	0.176832	-2.39981
SERINC2	-0.31908	7.35577	-2.77163	0.00650582	0.179229	-2.41361
MIR23A	0.313178	6.5892	2.77109	0.00651585	0.179329	-2.41489
RP11-392O17.1	-0.387342	5.12322	-2.77087	0.00652009	0.179329	-2.41543
CHIT1	0.182647	5.16938	2.77016	0.00653346	0.179404	-2.41714
MRPL9	-0.107893	6.62383	-2.77023	0.00653199	0.179404	-2.41695
ZHX3	0.156537	6.51169	2.76967	0.00654248	0.179476	-2.41829
RFX7	-0.272898	6.50044	-2.76945	0.00654672	0.179476	-2.41883
XPNPEP1	-0.222359	6.73356	-2.76881	0.00655871	0.17963	-2.42035
RP5-968J1.1	-0.326318	3.34413	-2.76859	0.00656298	0.17963	-2.42089
CCDC107	0.264725	6.36865	2.7665	0.00660245	0.179747	-2.42588
ARPP21-AS1	0.222656	2.40639	2.76674	0.00659781	0.179747	-2.4253
AC011196.3	0.217291	3.78018	2.76643	0.00660375	0.179747	-2.42605
FAM66C	-0.154971	5.6499	-2.76639	0.0066046	0.179747	-2.42615
USP13	-0.185579	6.47961	-2.76765	0.00658067	0.179747	-2.42313
EIF3M	-0.364861	8.76107	-2.76689	0.00659512	0.179747	-2.42496
C8orf4	-0.659667	6.50045	-2.76751	0.00658333	0.179747	-2.42347
TUBB6	0.28475	8.50004	2.76599	0.00661209	0.179806	-2.4271
FGF10-AS1	-0.466005	5.31611	-2.7657	0.00661768	0.179813	-2.4278
XG	0.870168	6.89594	2.765	0.00663098	0.180029	-2.42947
LOC101928519	-0.200548	2.55323	-2.76452	0.00664007	0.180131	-2.43061
GUSBP2	-0.421296	7.82342	-2.76264	0.00667605	0.180962	-2.43511
FAM193A	-0.0985102	6.93621	-2.76152	0.00669755	0.180963	-2.43778
DNA2	-0.168842	3.84247	-2.76209	0.00668663	0.180963	-2.43643
MPHOSPH6	-0.484289	6.72865	-2.76192	0.00668977	0.180963	-2.43682
SNORA80A	-0.599635	7.47991	-2.76154	0.00669709	0.180963	-2.43773
KANK2	0.249665	7.7861	2.76096	0.00670836	0.18111	-2.43913
DDX56	-0.163665	7.26171	-2.76043	0.00671846	0.181237	-2.44038
RP11-64P14.7	-0.174581	3.34771	-2.75936	0.0067392	0.181651	-2.44294
MYO5A	0.255858	6.02391	2.75831	0.00675944	0.181687	-2.44544
KCNK15	0.176385	5.27776	2.75757	0.00677388	0.181687	-2.44721
RP1-241P17.1	0.155428	6.41852	2.75775	0.00677039	0.181687	-2.44679
MAMLD1	0.146564	5.84688	2.75865	0.00675279	0.181687	-2.44462
PTPRO	0.117891	3.32092	2.75734	0.00677825	0.181687	-2.44775
TBC1D3P1-DHX40P1	-0.20407	6.71839	-2.75746	0.00677589	0.181687	-2.44746
FMO6P	-0.245292	3.60755	-2.75833	0.00675914	0.181687	-2.4454
SETD5	-0.190189	6.71445	-2.75601	0.00680415	0.182237	-2.45092
C1QA	0.274505	6.36419	2.7541	0.00684142	0.183089	-2.45547
PPFIA2	0.197377	3.66879	2.75298	0.00686352	0.18339	-2.45815
SLC25A44	0.155989	6.01939	2.75324	0.00685837	0.18339	-2.45753
PI16	0.541549	7.92057	2.7521	0.00688066	0.18347	-2.46023
ITGB3	0.445073	6.55515	2.75183	0.00688611	0.18347	-2.46088
LOC285074	-0.17638	6.44392	-2.75144	0.00689372	0.18347	-2.4618
RPARP-AS1	-0.183892	6.51039	-2.7518	0.00688676	0.18347	-2.46096
TUSC3	-0.457633	7.55339	-2.75155	0.00689163	0.18347	-2.46155
SYT15	0.193292	6.60271	2.75061	0.00691019	0.183648	-2.46379
RPS29	-0.181743	6.49817	-2.74973	0.00692763	0.183648	-2.46588
ZDBF2	-0.21353	6.11016	-2.75039	0.00691446	0.183648	-2.4643
ZCCHC11	-0.270495	6.60587	-2.74993	0.00692368	0.183648	-2.46541
WWC1	-0.449019	6.53846	-2.75005	0.00692118	0.183648	-2.46511
SULT1B1	0.12037	2.40032	2.749	0.00694204	0.183885	-2.46761
STARD4-AS1	-0.154684	4.44761	-2.74817	0.00695851	0.184105	-2.46958
CLSTN1	-0.378035	8.96349	-2.74803	0.00696125	0.184105	-2.46991
FZD7	-0.571616	6.77124	-2.74753	0.00697136	0.184228	-2.47112
MYEF2	-0.390118	5.84636	-2.74707	0.00698054	0.184326	-2.47221
LINC00702	0.302503	3.68322	2.74595	0.00700281	0.18448	-2.47486
SSMEM1	0.157376	2.77372	2.74615	0.0069988	0.18448	-2.47438
SCARNA9	-0.460933	9.157	-2.74639	0.00699407	0.18448	-2.47382
PLCG1	-0.114018	6.37967	-2.74396	0.00704268	0.185386	-2.47958
ZNF90	-0.26636	6.16979	-2.74318	0.00705841	0.185655	-2.48143
CATSPERB	-0.514746	4.08778	-2.74275	0.00706717	0.185741	-2.48246
SNORA47	-0.591001	10.4044	-2.74241	0.00707391	0.185773	-2.48326
DCUN1D3	0.288549	7.68213	2.74198	0.00708263	0.185774	-2.48428
TBX19	-0.171672	4.63602	-2.74187	0.00708498	0.185774	-2.48456
SLIT3	0.413732	8.66252	2.74136	0.0070953	0.18585	-2.48577
LINC00493	-0.313217	6.85315	-2.74114	0.00709964	0.18585	-2.48627
TOMM20	-0.351727	8.66607	-2.74091	0.00710441	0.18585	-2.48683
ENOSF1	-0.311561	6.3776	-2.73893	0.00714464	0.186758	-2.49153
XPO5	-0.203723	6.01308	-2.73854	0.00715255	0.18682	-2.49245
SSR2	-0.20963	6.91136	-2.73782	0.00716731	0.18706	-2.49416
MN1	0.373202	5.56587	2.73568	0.00721116	0.187245	-2.49923
MAP3K8	0.308994	6.95371	2.73618	0.00720075	0.187245	-2.49803
HAGLR	0.13455	5.64619	2.73558	0.00721326	0.187245	-2.49947
KIAA0226L	-0.237088	4.59114	-2.73686	0.00718682	0.187245	-2.49642
LAMB2P1	-0.245401	4.21193	-2.73601	0.00720424	0.187245	-2.49843
RPS16	-0.309755	11.0824	-2.73649	0.00719449	0.187245	-2.49731
MED23	-0.326773	7.13515	-2.73691	0.00718585	0.187245	-2.49631
ALAS2	0.427144	4.78128	2.73333	0.00725954	0.187498	-2.50478
VAV1	0.160754	5.94533	2.73286	0.00726931	0.187498	-2.5059
UFC1	-0.196651	7.348	-2.7329	0.00726848	0.187498	-2.50581
KBTBD11	-0.203703	5.92823	-2.73333	0.00725964	0.187498	-2.5048
MIR301B	-0.209053	2.63866	-2.73241	0.00727861	0.187498	-2.50696
IPO4	-0.213907	6.60414	-2.73482	0.00722888	0.187498	-2.50127
RASL10A	-0.215599	6.45886	-2.73316	0.00726304	0.187498	-2.50518
SUDS3	-0.235281	6.81041	-2.73255	0.00727571	0.187498	-2.50663
USP28	-0.293018	6.00567	-2.73279	0.00727076	0.187498	-2.50607
TBC1D32	-0.383912	4.4215	-2.73293	0.00726788	0.187498	-2.50574
CTLA4	-0.244244	4.19183	-2.7319	0.00728926	0.187498	-2.50818
ZNF675	-0.430798	6.49118	-2.73187	0.00728974	0.187498	-2.50823
MAP4	0.250184	7.62854	2.7313	0.00730165	0.187518	-2.50959
SNORA70C	-0.338846	4.50698	-2.73153	0.00729683	0.187518	-2.50904
ANXA2P1	0.393417	6.15693	2.73022	0.00732407	0.187523	-2.51214
TTC7A	0.132736	6.37447	2.73029	0.00732259	0.187523	-2.51197
PMS2L2	-0.286273	7.88174	-2.73089	0.00731008	0.187523	-2.51055
SNORA70E	-0.353575	5.97326	-2.73028	0.00732285	0.187523	-2.512
ALDH3B1	0.166225	6.63221	2.7296	0.00733697	0.187711	-2.5136
CES1P2	0.260656	5.88541	2.72727	0.00738578	0.188816	-2.5191
PHLDB1	0.244641	7.12481	2.727	0.00739143	0.188817	-2.51974
XPNPEP2	0.386354	5.52289	2.72608	0.00741082	0.188924	-2.52192
LINC00263	0.369668	6.39578	2.72598	0.00741289	0.188924	-2.52215
FAM86DP	-0.166396	6.64895	-2.72549	0.00742332	0.188924	-2.52332
CYFIP2	-0.189051	5.64742	-2.72548	0.00742361	0.188924	-2.52335
OR7E156P	-0.249522	5.83144	-2.72634	0.00740543	0.188924	-2.52131
PCGF3	-0.170345	6.95791	-2.72499	0.00743384	0.189042	-2.52449
FAM212B	0.173146	4.88392	2.72439	0.00744653	0.189222	-2.52591
ESRP2	-0.31947	6.56295	-2.72375	0.00746005	0.18928	-2.52741
RNF144B	-0.460802	7.5098	-2.72379	0.00745935	0.18928	-2.52734
2021-03-02	0.261373	7.46246	2.72316	0.00747265	0.189457	-2.52882
MCM4	-0.257575	6.29312	-2.72239	0.00748896	0.189501	-2.53063
SPDEF	-0.501758	7.463	-2.72228	0.00749127	0.189501	-2.53088
TOX3	-0.535107	5.91609	-2.72281	0.00748013	0.189501	-2.52965
BACH2	-0.159256	5.77383	-2.7208	0.00752285	0.189731	-2.53437
TTC19	-0.21628	7.00748	-2.72087	0.00752133	0.189731	-2.53421
PKP2	-0.534617	6.79164	-2.72133	0.00751155	0.189731	-2.53313
DSC2	-0.722956	7.773	-2.72131	0.00751198	0.189731	-2.53317
RERE	-0.16161	7.56322	-2.71966	0.00754724	0.189971	-2.53706
RP11-114M1.1	-0.18754	2.46333	-2.71957	0.00754924	0.189971	-2.53728
TRIM27	-0.200293	6.15628	-2.71995	0.00754098	0.189971	-2.53637
ZNF124	-0.287507	5.6753	-2.71915	0.00755815	0.190053	-2.53826
CRCP	-0.169625	8.3754	-2.71869	0.00756815	0.190162	-2.53936
LOC101928424	-0.198584	4.88863	-2.71719	0.00760031	0.190545	-2.54288
PDXDC2P	-0.233762	7.78193	-2.71741	0.00759549	0.190545	-2.54235
OVCH2	-0.373181	4.40334	-2.71768	0.00758966	0.190545	-2.54171
NT5E	0.566751	7.7795	2.7131	0.00768891	0.191268	-2.5525
RP11-95I16.2	0.43671	4.22755	2.71546	0.00763779	0.191268	-2.54696
MIR142	0.372659	3.35402	2.71366	0.00767675	0.191268	-2.55118
RP11-223F20.2	0.284124	2.95456	2.71333	0.00768396	0.191268	-2.55196
ABCC6P1	0.234987	5.67199	2.71272	0.00769722	0.191268	-2.55339
RP4-765C7.1	-0.181603	2.33251	-2.71518	0.0076437	0.191268	-2.5476
PRMT5	-0.254267	7.1174	-2.7146	0.0076564	0.191268	-2.54898
ACVR2A	-0.299601	6.95357	-2.71289	0.0076935	0.191268	-2.55299
LAPTM4B	-0.331859	7.63247	-2.71289	0.00769349	0.191268	-2.55299
ATL1	-0.347933	6.67382	-2.71438	0.00766109	0.191268	-2.54949
RNU6-162P	-0.395657	3.44253	-2.71354	0.00767942	0.191268	-2.55147
TNN	-0.420535	6.75603	-2.71375	0.00767491	0.191268	-2.55099
DPH1	-0.156322	6.46399	-2.71224	0.00770772	0.191388	-2.55453
C1QC	0.49742	7.53731	2.71119	0.00773056	0.191411	-2.55698
HLCS	-0.231622	6.56958	-2.71161	0.00772139	0.191411	-2.556
ZNF844	-0.34916	6.95911	-2.71179	0.00771764	0.191411	-2.55559
RNA5SP385	-0.386474	4.61547	-2.71116	0.00773137	0.191411	-2.55707
ZMYM4-AS1	-0.202919	2.9302	-2.70979	0.00776126	0.191729	-2.56027
DIEXF	-0.300942	6.41016	-2.70984	0.00776026	0.191729	-2.56016
FNBP1L	-0.375191	8.13881	-2.70997	0.00775751	0.191729	-2.55987
MGAM	0.157725	3.7231	2.70888	0.00778148	0.191947	-2.56243
SERBP1	-0.254631	9.49175	-2.70911	0.00777631	0.191947	-2.56188
LHCGR	0.41181	3.71943	2.70822	0.00779603	0.192165	-2.56398
GPR4	0.27687	5.89445	2.70786	0.00780387	0.192218	-2.56481
MYO5B	-0.512802	6.54896	-2.70755	0.00781079	0.192248	-2.56555
TTLL4	-0.294137	5.96507	-2.70669	0.0078297	0.192573	-2.56755
LOC541472	0.610906	4.38706	2.70514	0.00786418	0.192718	-2.5712
AP000290.7	0.207527	2.86834	2.7055	0.00785605	0.192718	-2.57034
HSD17B10	0.187156	7.79754	2.70526	0.00786149	0.192718	-2.57091
MAML2	-0.292907	7.82328	-2.70615	0.00784174	0.192718	-2.56883
NETO2	-0.531236	5.55697	-2.70545	0.00785728	0.192718	-2.57047
PXDC1	0.284684	7.31694	2.70421	0.00788481	0.193083	-2.57337
MAP1B	0.364088	8.51056	2.7031	0.00790955	0.193549	-2.57597
LATS2	0.231318	7.18381	2.70063	0.00796506	0.194202	-2.58177
WSCD2	0.180498	4.79993	2.70101	0.00795644	0.194202	-2.58087
ZFP62	-0.237472	6.06908	-2.7013	0.00795005	0.194202	-2.5802
RP11-165F24.5	-0.319376	3.20323	-2.70094	0.0079581	0.194202	-2.58104
HIST1H2BF	-0.479786	5.88471	-2.70063	0.00796489	0.194202	-2.58175
GLP2R	0.230256	4.48925	2.70006	0.00797772	0.194358	-2.58309
CHD4	-0.236332	8.19852	-2.69983	0.00798299	0.194358	-2.58363
ITFG2	-0.209508	7.36942	-2.69934	0.00799407	0.194414	-2.58478
RTTN	-0.264934	5.36966	-2.69922	0.00799682	0.194414	-2.58507
ISM1	0.31432	7.53673	2.69873	0.00800773	0.194539	-2.5862
ZNF587	-0.247216	6.28385	-2.69754	0.00803483	0.194917	-2.589
HIST1H2BI	-0.367021	4.42911	-2.69768	0.00803154	0.194917	-2.58866
CPSF1	-0.181959	7.13995	-2.69718	0.008043	0.194975	-2.58984
HDAC2	-0.26947	6.85063	-2.69677	0.00805226	0.195059	-2.5908
SMAD6	0.312279	6.122	2.69432	0.00810814	0.196131	-2.59653
PARD6G	-0.271439	6.03165	-2.69435	0.00810732	0.196131	-2.59644
MND1	-0.156163	3.33284	-2.69233	0.00815378	0.196952	-2.60118
PAICS	-0.374586	7.47404	-2.6924	0.00815211	0.196952	-2.60101
DDX10	-0.298407	7.01835	-2.69143	0.00817446	0.197311	-2.60328
FCER1G	0.516576	6.95957	2.69003	0.00820665	0.197548	-2.60654
DHX30	-0.109012	6.44916	-2.69016	0.00820357	0.197548	-2.60623
RBBP4	-0.287908	8.31318	-2.69067	0.00819189	0.197548	-2.60505
OGT	-0.392275	8.09674	-2.68998	0.00820775	0.197548	-2.60665
HS6ST2	-0.289477	4.56656	-2.68951	0.00821868	0.19767	-2.60775
DDX39B	-0.186667	7.2962	-2.68914	0.00822721	0.197735	-2.60861
SELPLG	0.194018	6.00599	2.68871	0.0082373	0.197836	-2.60963
LRRC2	0.244889	4.81093	2.68805	0.00825248	0.197979	-2.61115
DTX2P1-UPK3BP1-PMS2P11	-0.216307	7.53325	-2.68794	0.00825502	0.197979	-2.61141
KCNJ16	0.384755	4.47012	2.68668	0.00828433	0.198037	-2.61434
RASSF8-AS1	0.098916	5.17421	2.68743	0.00826698	0.198037	-2.61261
PLCB4	-0.336539	6.80643	-2.68699	0.00827716	0.198037	-2.61363
SLC7A3	-0.52911	5.55572	-2.68658	0.00828678	0.198037	-2.61459
KRT18	-0.721572	8.35269	-2.6869	0.00827934	0.198037	-2.61384
AKR1C4	0.376004	4.05583	2.68597	0.00830104	0.198237	-2.61601
H6PD	0.168134	7.50744	2.68553	0.00831129	0.198342	-2.61704
RAB11B-AS1	-0.211314	7.45201	-2.68504	0.00832277	0.198348	-2.61818
FAU	-0.242069	7.0543	-2.68481	0.00832816	0.198348	-2.61872
EIF2A	-0.279695	8.36577	-2.68476	0.00832921	0.198348	-2.61882
RP11-71E19.2	0.210473	3.12634	2.68281	0.00837518	0.198462	-2.62338
LINC00644	0.175368	2.20113	2.6838	0.00835184	0.198462	-2.62107
TOM1	0.148182	7.49758	2.68285	0.00837412	0.198462	-2.62327
THOC5	-0.117948	6.96191	-2.68311	0.00836803	0.198462	-2.62267
GTF2F1	-0.119227	7.66116	-2.68336	0.0083622	0.198462	-2.62209
DDR1	-0.239444	6.97672	-2.68424	0.00834149	0.198462	-2.62004
RP11-272P10.2	-0.270951	3.6655	-2.68352	0.00835839	0.198462	-2.62172
TOB2P1	0.191187	4.64814	2.68218	0.00838991	0.198532	-2.62484
MAD2L1	-0.230777	4.05181	-2.68224	0.00838855	0.198532	-2.6247
PTPN2	-0.241892	6.57137	-2.68136	0.0084094	0.198853	-2.62676
FMO3	0.401072	5.03163	2.68064	0.00842639	0.198968	-2.62843
COMMD6	-0.0994008	4.73432	-2.68039	0.00843224	0.198968	-2.629
ANKHD1	-0.223115	7.76049	-2.68056	0.00842815	0.198968	-2.6286
RNU6-267P	-0.391981	3.44939	-2.67991	0.00844373	0.198968	-2.63013
PROM1	-0.967183	7.24522	-2.68005	0.00844023	0.198968	-2.62979
LOC283070	0.494036	6.18248	2.67768	0.00849661	0.199083	-2.6353
LOC100507480	0.180573	3.49139	2.67739	0.00850365	0.199083	-2.63599
MED7	0.122371	5.68886	2.67859	0.00847502	0.199083	-2.63319
TPTEP1	-0.189431	5.50314	-2.67934	0.00845709	0.199083	-2.63144
PMS2P4	-0.207326	6.8634	-2.67766	0.00849721	0.199083	-2.63536
CNOT10-AS1	-0.210054	2.97497	-2.67722	0.00850766	0.199083	-2.63638
TTI1	-0.212928	6.79071	-2.67843	0.00847882	0.199083	-2.63356
NUP210	-0.256704	6.25341	-2.67733	0.00850492	0.199083	-2.63611
C1orf210	-0.285574	6.07689	-2.67916	0.00846144	0.199083	-2.63187
MS4A1	-0.486881	4.15869	-2.67744	0.00850247	0.199083	-2.63587
MTL5	-0.20944	4.81793	-2.67659	0.00852258	0.199294	-2.63783
ZNF43	-0.356337	5.32509	-2.67631	0.0085293	0.199313	-2.63848
RBPMS2	0.279272	6.0983	2.67573	0.00854326	0.199501	-2.63983
CCDC34	-0.328434	6.0245	-2.67473	0.00856732	0.199924	-2.64216
PCYT1A	0.248098	7.00166	2.674	0.00858473	0.200123	-2.64384
INTS3	-0.167051	7.29599	-2.67336	0.00860022	0.200123	-2.64534
N4BP2	-0.343816	5.93128	-2.6734	0.00859929	0.200123	-2.64525
LOC101927016	-0.395845	3.69702	-2.67314	0.00860552	0.200123	-2.64585
SNORD78	-0.661513	8.04368	-2.67374	0.00859113	0.200123	-2.64446
SFXN2	-0.24535	6.18834	-2.6726	0.00861858	0.200288	-2.6471
PABPC4L	-0.233316	6.3456	-2.67228	0.00862624	0.200328	-2.64784
CD248	0.592889	6.70134	2.6715	0.00864518	0.20063	-2.64965
ZNF385A	0.210451	6.60853	2.67061	0.00866675	0.200795	-2.65171
RP11-388K12.2	0.185866	2.19223	2.67047	0.00867013	0.200795	-2.65204
BRIP1	-0.381079	3.92983	-2.67059	0.00866734	0.200795	-2.65177
OSBPL11	0.309412	6.5342	2.66865	0.00871449	0.201131	-2.65626
PLD3	0.169436	7.40644	2.66962	0.0086909	0.201131	-2.65402
AP4B1	-0.10875	5.4355	-2.66888	0.0087089	0.201131	-2.65573
BTBD11	-0.15318	5.37584	-2.66878	0.00871136	0.201131	-2.65596
MTAP	-0.170329	5.1822	-2.6687	0.00871318	0.201131	-2.65614
SCN9A	0.566497	4.25762	2.66769	0.00873804	0.201282	-2.65849
UCP2	0.326088	6.99359	2.66737	0.00874585	0.201282	-2.65923
RP11-89M20.2	0.201678	2.95003	2.66678	0.00876026	0.201282	-2.6606
PDCD11	-0.198657	6.52137	-2.66754	0.00874167	0.201282	-2.65884
ARMCX5	-0.20662	5.65618	-2.66668	0.00876279	0.201282	-2.66084
NCKAP5	-0.232377	6.00934	-2.66687	0.00875815	0.201282	-2.6604
CMTM7	-0.356205	6.24497	-2.66692	0.00875676	0.201282	-2.66027
CEP57	-0.242658	6.79482	-2.66618	0.00877487	0.201422	-2.66198
LOC653513	0.447181	6.48581	2.66588	0.00878231	0.201455	-2.66268
PGA3	0.250393	5.32947	2.66437	0.00881956	0.201761	-2.66618
RP11-391J2.3	0.199575	2.64864	2.66479	0.00880924	0.201761	-2.66521
RP13-57D9.3	0.19755	2.69143	2.66464	0.00881274	0.201761	-2.66554
TUBGCP4	-0.286074	6.84679	-2.66455	0.00881508	0.201761	-2.66576
LOC101928015	0.242879	3.96115	2.66255	0.00886442	0.202512	-2.67038
NCAPD2	-0.204389	6.81424	-2.66279	0.00885846	0.202512	-2.66982
ADAMTSL4	0.217916	6.16259	2.66225	0.0088719	0.202546	-2.67107
GLDN	0.449955	5.89927	2.6619	0.00888051	0.202605	-2.67188
IDH3A	0.28627	7.33036	2.66105	0.00890181	0.202681	-2.67386
LOC101926943	-0.159301	4.62296	-2.66146	0.00889153	0.202681	-2.6729
PHC1	-0.168348	7.00034	-2.66105	0.00890185	0.202681	-2.67386
TESPA1	0.127037	4.4232	2.65933	0.00894469	0.203519	-2.67783
SLC25A15	-0.20934	5.84799	-2.65878	0.00895831	0.203691	-2.67909
UAP1	0.350273	7.38428	2.65817	0.00897377	0.203737	-2.68052
JDP2	0.199147	6.5168	2.6583	0.0089703	0.203737	-2.6802
ZFHX3	0.179755	6.41614	2.6575	0.00899053	0.203737	-2.68206
FANCA	-0.146276	5.0342	-2.65797	0.00897869	0.203737	-2.68097
MED17	-0.247953	6.53788	-2.6576	0.00898793	0.203737	-2.68182
LINC00984	0.242606	5.91317	2.6549	0.00905591	0.204539	-2.68805
HTATSF1P2	0.225153	5.38378	2.65512	0.00905027	0.204539	-2.68754
RUVBL1	-0.167034	6.1572	-2.65514	0.0090499	0.204539	-2.6875
PSMB7	-0.209073	7.74692	-2.65489	0.00905626	0.204539	-2.68808
PDXDC1	-0.21734	7.98853	-2.65499	0.00905377	0.204539	-2.68786
PLK4	-0.195295	3.24465	-2.65396	0.00907972	0.204932	-2.69022
CYP2A7	0.220366	4.92155	2.65339	0.00909415	0.20512	-2.69154
CCDC8	-0.231984	6.78731	-2.65217	0.00912509	0.205681	-2.69435
RP4-559A3.6	0.249842	3.92646	2.65182	0.0091341	0.205746	-2.69516
ABCC8	-0.162964	5.90623	-2.65142	0.00914414	0.205835	-2.69607
ALDH4A1	0.290502	6.29113	2.65076	0.00916107	0.205966	-2.6976
ZZZ3	-0.325614	6.83509	-2.65072	0.00916219	0.205966	-2.6977
SHROOM4	0.239177	5.64865	2.6501	0.00917805	0.206185	-2.69913
FAM115C	-0.179561	6.19358	-2.64973	0.0091875	0.206203	-2.69998
RAB38	-0.46187	5.39655	-2.64959	0.00919108	0.206203	-2.7003
RP11-404I7.2	0.254988	3.68203	2.64846	0.00921992	0.206402	-2.70289
CYP26B1	0.219372	6.24281	2.64829	0.00922444	0.206402	-2.7033
HSP90AB1	-0.276712	10.5687	-2.64883	0.00921052	0.206402	-2.70205
STAB2	-0.393141	5.0673	-2.64856	0.00921745	0.206402	-2.70267
LINC01088	0.160107	3.18385	2.64651	0.00927031	0.207291	-2.7074
SNX15	0.126553	6.2335	2.64519	0.00930431	0.207913	-2.71042
RP11-197P3.5	-0.242826	2.99324	-2.64461	0.00931925	0.20803	-2.71175
ALDH18A1	-0.250827	7.08363	-2.64451	0.00932185	0.20803	-2.71198
PNP	0.320495	6.15993	2.64313	0.00935773	0.208301	-2.71515
FAM127A	0.212686	7.5436	2.64289	0.00936404	0.208301	-2.71571
PABPC4	-0.174146	7.24818	-2.64304	0.00936004	0.208301	-2.71536
DCAF16	-0.334616	7.44786	-2.64335	0.00935194	0.208301	-2.71464
C10orf90	-0.358768	4.63702	-2.64286	0.00936488	0.208301	-2.71578
KCTD21	0.160085	6.32874	2.64185	0.00939102	0.208744	-2.71809
QSER1	-0.294872	7.29609	-2.64122	0.00940774	0.208978	-2.71956
RPL31	-0.299421	4.45619	-2.64072	0.00942059	0.209126	-2.72068
GOLIM4	0.284951	8.28037	2.63869	0.00947386	0.209346	-2.72534
POPDC3	0.252352	3.62559	2.63798	0.00949257	0.209346	-2.72697
TNFRSF11B	0.246626	4.74164	2.6383	0.00948437	0.209346	-2.72626
RASSF8	0.219615	6.55641	2.63816	0.00948805	0.209346	-2.72658
E2F4	0.138577	6.6747	2.63908	0.00946373	0.209346	-2.72446
SLC37A4	-0.12476	5.92846	-2.63824	0.0094858	0.209346	-2.72638
LOC100630923	-0.157763	7.46313	-2.63935	0.00945675	0.209346	-2.72385
TMEM101	-0.219639	7.00382	-2.63906	0.00946436	0.209346	-2.72451
MGME1	-0.336096	6.7318	-2.63898	0.00946638	0.209346	-2.72469
CX3CL1	-0.704072	9.08451	-2.63953	0.00945188	0.209346	-2.72342
CLIC5	0.309723	4.09716	2.63746	0.00950652	0.209516	-2.72819
RHOG	0.133311	7.2436	2.63608	0.00954284	0.209905	-2.73133
BRD8	-0.158859	6.51185	-2.63629	0.00953745	0.209905	-2.73087
UBE4B	-0.210684	7.4117	-2.63609	0.00954275	0.209905	-2.73133
LOC286297	0.593796	5.25738	2.63478	0.00957727	0.210067	-2.73431
FHIT	-0.182175	5.1585	-2.63504	0.00957036	0.210067	-2.73371
MXI1	-0.214309	7.59099	-2.63419	0.00959298	0.210067	-2.73566
LINC00412	-0.263125	2.81803	-2.63483	0.00957617	0.210067	-2.73421
USP54	-0.288874	6.65642	-2.63457	0.009583	0.210067	-2.7348
GNL3	-0.316963	6.28383	-2.63554	0.00955718	0.210067	-2.73257
ZNF883	-0.346259	4.77747	-2.63416	0.0095938	0.210067	-2.73573
MIR4298	0.307459	4.94728	2.63373	0.00960521	0.21018	-2.73671
FERMT3	0.139289	6.04164	2.63289	0.00962787	0.210482	-2.73866
AC022816.2	-0.12013	4.97641	-2.63252	0.00963774	0.210482	-2.73951
HOMER2	-0.271267	5.77413	-2.63264	0.0096344	0.210482	-2.73922
HSPA12A	0.245054	6.30998	2.63197	0.00965233	0.210528	-2.74076
SNORD91A	-0.325494	3.45621	-2.63203	0.00965073	0.210528	-2.74062
ADPRH	0.150068	5.7022	2.63142	0.00966718	0.210716	-2.74202
PRPF6	-0.182168	7.71967	-2.63109	0.00967601	0.210772	-2.74278
NINJ2	0.174691	5.86141	2.63075	0.00968495	0.210831	-2.74354
KLHDC7A	0.268866	4.53857	2.63049	0.0096919	0.210846	-2.74413
SHISA3	0.217335	5.80114	2.62985	0.00970916	0.210956	-2.7456
RAB35	0.127275	6.63103	2.62984	0.00970949	0.210956	-2.74563
ETHE1	-0.180578	7.28171	-2.6295	0.00971869	0.210992	-2.74641
SMA5	-0.476136	6.85342	-2.62931	0.00972366	0.210992	-2.74683
FBLN1	0.284478	6.56541	2.62702	0.00978562	0.211002	-2.75208
HCN1	0.249775	3.9866	2.62698	0.00978669	0.211002	-2.75217
TMEM231	-0.115902	6.16131	-2.62845	0.00974693	0.211002	-2.74881
MFSD4	-0.173691	6.05099	-2.62784	0.00976357	0.211002	-2.75022
MCM9	-0.174395	6.12737	-2.62806	0.00975759	0.211002	-2.74971
RP11-692D12.1	-0.192113	4.40108	-2.62715	0.00978222	0.211002	-2.75179
LGR6	-0.205138	6.15144	-2.62728	0.00977863	0.211002	-2.75149
LOC100130992	-0.319495	4.25423	-2.6278	0.00976457	0.211002	-2.7503
B4GALT1	-0.325097	8.23812	-2.62702	0.00978554	0.211002	-2.75207
CDH3	-0.591314	7.44006	-2.62708	0.00978412	0.211002	-2.75195
RRP1	-0.131908	6.30411	-2.62672	0.00979385	0.211021	-2.75277
FGF2	0.422225	8.43631	2.62581	0.00981854	0.211101	-2.75485
CTIF	0.272237	7.04774	2.6256	0.0098241	0.211101	-2.75532
AKR1E2	-0.18149	5.26358	-2.62543	0.00982884	0.211101	-2.75571
PUM1	-0.251364	8.91198	-2.62569	0.00982164	0.211101	-2.75511
PRKCSH	-0.258121	9.57033	-2.62585	0.00981744	0.211101	-2.75476
RNU4-17P	-0.297276	2.717	-2.62517	0.0098358	0.211116	-2.7563
EML1	0.261547	6.77995	2.62447	0.0098549	0.211257	-2.7579
FAM134B	0.212578	5.86636	2.62461	0.00985106	0.211257	-2.75758
FGF13	0.161987	6.6036	2.62389	0.0098708	0.211463	-2.75923
RNU6ATAC12P	0.168022	2.07103	2.62316	0.00989066	0.211754	-2.76089
MIR892B	0.202328	2.98929	2.62224	0.00991592	0.21216	-2.76299
METTL24	-0.230601	5.27254	-2.62125	0.00994316	0.212608	-2.76526
CCDC69	0.451516	7.07031	2.61948	0.00999196	0.212712	-2.7693
SYNE3	0.361598	7.04755	2.62051	0.00996353	0.212712	-2.76695
KCNA2	0.239096	4.96962	2.62027	0.00997022	0.212712	-2.7675
ANXA4	0.235025	7.31029	2.61974	0.00998473	0.212712	-2.7687
TTC21B-AS1	0.164924	3.10943	2.62059	0.00996125	0.212712	-2.76676
LMBR1	-0.105169	6.76012	-2.61982	0.00998251	0.212712	-2.76852
APLN	-0.228836	5.48449	-2.61947	0.00999219	0.212712	-2.76932
RP11-403I13.7	0.23244	5.19357	2.61866	0.0100145	0.212919	-2.77116
ARHGAP32	-0.297816	6.58504	-2.61885	0.0100093	0.212919	-2.77073
PLD2	-0.180724	6.80257	-2.61803	0.0100321	0.212943	-2.7726
PCAT1	-0.238662	4.23567	-2.61794	0.0100346	0.212943	-2.77281
LOC440910	-0.316175	4.40237	-2.61804	0.0100317	0.212943	-2.77257
MFAP5	0.936121	9.27694	2.61751	0.0100464	0.212988	-2.77378
GRK5	0.324582	6.61169	2.61741	0.0100493	0.212988	-2.77402
LINC00845	-0.170404	2.55096	-2.61387	0.010148	0.214809	-2.78208
SETMAR	-0.212235	6.67135	-2.61387	0.0101479	0.214809	-2.78207
GALT	-0.127089	5.81129	-2.6127	0.0101808	0.215369	-2.78474
LRRC32	0.378135	7.10975	2.61028	0.0102489	0.216525	-2.79024
GLRX2	0.121084	5.87308	2.60939	0.010274	0.216525	-2.79226
ARMCX6	-0.160984	7.33031	-2.61036	0.0102468	0.216525	-2.79007
ZNF256	-0.171109	6.33772	-2.60982	0.0102619	0.216525	-2.79128
GRB7	-0.2195	6.20542	-2.6096	0.0102682	0.216525	-2.79179
GGCT	-0.352206	6.02401	-2.60973	0.0102646	0.216525	-2.7915
ZCCHC24	0.213167	7.32133	2.6089	0.0102878	0.216546	-2.79336
TMEM104	0.140245	6.59014	2.60894	0.0102868	0.216546	-2.79328
TMEM81	-0.181533	2.24252	-2.60848	0.0102997	0.216661	-2.79432
SMPDL3B	-0.253081	5.93359	-2.60813	0.0103099	0.216739	-2.79513
ZKSCAN1	-0.305763	7.64629	-2.60756	0.010326	0.216919	-2.79642
SNORA59B	-0.601484	7.27811	-2.60737	0.0103313	0.216919	-2.79684
MARS2	-0.22049	5.74896	-2.60699	0.0103423	0.217015	-2.79772
CAPRIN1	-0.240368	9.40057	-2.60635	0.0103604	0.21726	-2.79916
MIR4320	-0.386493	3.24115	-2.60536	0.0103888	0.21772	-2.80142
PGM2	-0.259936	6.65005	-2.60434	0.0104179	0.217923	-2.80372
HNRNPA1P44	-0.28707	8.04251	-2.60436	0.0104173	0.217923	-2.80367
KLHL13	-0.428931	5.18316	-2.6046	0.0104105	0.217923	-2.80314
FAM177A1	0.145958	7.111	2.60396	0.0104289	0.218017	-2.80459
ZMYM3	-0.117933	6.32318	-2.60284	0.0104611	0.218555	-2.80713
OR7E91P	-0.272612	5.58629	-2.60256	0.0104691	0.218587	-2.80776
CFL1P3	0.165614	6.59743	2.60186	0.0104893	0.218737	-2.80935
MTMR4	-0.165046	6.91301	-2.60187	0.0104891	0.218737	-2.80933
GNAZ	0.193944	6.91097	2.60134	0.0105042	0.218914	-2.81052
PDE4A	0.168788	6.465	2.6011	0.0105113	0.218926	-2.81107
KDM6A	-0.278598	7.09727	-2.60052	0.010528	0.219002	-2.81238
ZNF681	-0.296027	4.88506	-2.60068	0.0105234	0.219002	-2.81202
MED24	-0.14399	7.2058	-2.59995	0.0105446	0.219127	-2.81368
RNU1-85P	-0.775572	6.08173	-2.59987	0.0105469	0.219127	-2.81386
RP13-884E18.2	0.176524	2.36031	2.59959	0.010555	0.21916	-2.8145
HILPDA	0.427137	6.02004	2.59879	0.0105781	0.219234	-2.8163
ATG4A	0.17341	5.74952	2.59891	0.0105746	0.219234	-2.81602
TIA1	-0.309067	4.4274	-2.59906	0.0105703	0.219234	-2.81569
TTLL12	-0.170099	7.03771	-2.59687	0.010634	0.220123	-2.82064
ST8SIA2	-0.236687	5.66922	-2.59699	0.0106305	0.220123	-2.82037
C3	0.501695	10.1682	2.59427	0.0107105	0.220809	-2.82654
C3AR1	0.426416	5.59544	2.59322	0.0107411	0.220809	-2.82889
TMEM255A	0.379157	6.00161	2.59282	0.0107531	0.220809	-2.82981
ATP8B4	0.333909	4.6599	2.59418	0.0107129	0.220809	-2.82673
AMOTL2	0.183542	7.28459	2.59343	0.0107352	0.220809	-2.82844
TPM3	0.158033	6.07129	2.59452	0.0107031	0.220809	-2.82597
LILRA1	0.14801	4.7942	2.59437	0.0107075	0.220809	-2.82631
SHISA4	0.135578	6.44746	2.59269	0.010757	0.220809	-2.83011
PSPC1	-0.16047	5.46376	-2.5936	0.0107301	0.220809	-2.82805
VPS35	-0.165141	5.93547	-2.59262	0.0107589	0.220809	-2.83025
C1QBP	-0.280721	8.25213	-2.59322	0.0107414	0.220809	-2.82891
LOC283299	-0.457361	4.75782	-2.59335	0.0107374	0.220809	-2.82861
PM20D2	-0.470835	6.47062	-2.59465	0.0106992	0.220809	-2.82567
HIST1H1E	-0.553258	10.2588	-2.59489	0.0106921	0.220809	-2.82512
TLDC1	-0.165815	6.01938	-2.59229	0.0107688	0.220878	-2.83101
PLAUR	0.288574	6.09119	2.59191	0.01078	0.220974	-2.83187
SYMPK	-0.116664	7.141	-2.59161	0.0107887	0.221017	-2.83253
FAM120B	-0.158521	6.66309	-2.59132	0.0107975	0.221029	-2.8332
RAP1GAP2	-0.206171	6.00799	-2.59097	0.0108078	0.221029	-2.83399
RHOJ	-0.349472	7.16599	-2.59093	0.0108089	0.221029	-2.83407
DPH3	0.228239	6.07393	2.59028	0.0108282	0.221154	-2.83554
PINK1	0.148344	6.85022	2.59041	0.0108242	0.221154	-2.83524
AC091177.1	0.189602	5.20832	2.58883	0.0108712	0.221765	-2.83881
DCP1B	-0.173751	6.06969	-2.58896	0.0108675	0.221765	-2.83852
SVEP1	0.402968	6.59264	2.58776	0.0109033	0.221992	-2.84123
TPSD1	0.256587	6.92617	2.58726	0.0109181	0.221992	-2.84235
SHE	0.215534	6.81722	2.58755	0.0109095	0.221992	-2.8417
LSAMP	0.201328	4.98622	2.58683	0.0109312	0.221992	-2.84334
ZNF346	-0.131304	5.65978	-2.58724	0.0109188	0.221992	-2.8424
ZNF713	-0.179871	4.83548	-2.58695	0.0109274	0.221992	-2.84305
PDS5A	-0.251687	7.85903	-2.5867	0.010935	0.221992	-2.84362
ATL2	-0.434716	7.59831	-2.5871	0.010923	0.221992	-2.84272
SNRPN	-0.198424	5.27043	-2.58617	0.0109508	0.222084	-2.84481
LOC100130899	-0.516485	5.63965	-2.58611	0.0109527	0.222084	-2.84496
ZNF384	-0.10861	6.27469	-2.58558	0.0109685	0.222137	-2.84614
TMTC4	-0.181846	5.89039	-2.58571	0.0109647	0.222137	-2.84586
TACC1	0.400461	8.51042	2.58304	0.0110451	0.222246	-2.85187
TRIM8	0.188943	7.26434	2.58446	0.0110022	0.222246	-2.84867
HMCES	0.138488	7.52923	2.58319	0.0110405	0.222246	-2.85153
WNT5B	-0.111922	5.35905	-2.58326	0.0110383	0.222246	-2.85137
OXSM	-0.206511	5.29101	-2.58316	0.0110414	0.222246	-2.85159
ZNF426	-0.234905	6.98517	-2.583	0.0110464	0.222246	-2.85197
EDRF1	-0.242731	6.09985	-2.58431	0.0110067	0.222246	-2.84901
CNTN1	-0.244799	5.27187	-2.58369	0.0110253	0.222246	-2.8504
SF3B3	-0.264474	8.16165	-2.5839	0.011019	0.222246	-2.84992
IRX3	-0.527234	8.06193	-2.58313	0.0110425	0.222246	-2.85167
KCNC2	-0.531376	4.29447	-2.58365	0.0110268	0.222246	-2.85051
F13A1	0.781033	8.9149	2.57831	0.011189	0.222584	-2.86252
AOX1	0.683759	6.95932	2.5743	0.011312	0.222584	-2.87152
AKR1C3	0.550363	6.28	2.5778	0.0112045	0.222584	-2.86366
MS4A6A	0.478191	6.25542	2.57605	0.0112582	0.222584	-2.8676
P2RY13	0.394804	5.91739	2.58105	0.0111053	0.222584	-2.85635
MNDA	0.377735	5.39477	2.57505	0.011289	0.222584	-2.86984
FAM107A	0.309126	6.85194	2.58004	0.0111361	0.222584	-2.85862
CRIP1	0.256133	6.74319	2.57445	0.0113076	0.222584	-2.8712
LOC101927354	0.244959	3.9865	2.57944	0.0111543	0.222584	-2.85997
SLC35F1	0.238451	4.8017	2.58143	0.011094	0.222584	-2.8555
ABCC6P2	0.237007	5.99727	2.57468	0.0113004	0.222584	-2.87067
ABL2	0.219542	6.39105	2.58205	0.0110751	0.222584	-2.8541
TNFAIP2	0.216478	7.89457	2.5777	0.0112077	0.222584	-2.86389
KCNA6	0.201193	5.26206	2.5756	0.0112719	0.222584	-2.8686
LOC101928340	0.186629	3.19588	2.57919	0.011162	0.222584	-2.86053
SMIM2-IT1	0.185413	4.03328	2.57392	0.0113239	0.222584	-2.87238
MIR521-1	0.178783	2.3528	2.58085	0.0111116	0.222584	-2.85681
IRAK2	0.172602	5.51739	2.58199	0.011077	0.222584	-2.85424
CARS	0.150203	6.61518	2.57603	0.0112589	0.222584	-2.86765
FMNL1	0.150035	6.55851	2.57378	0.0113283	0.222584	-2.8727
STRIP1	-0.0894051	6.16915	-2.57938	0.0111564	0.222584	-2.86012
ZNF174	-0.114513	5.42926	-2.58147	0.0110928	0.222584	-2.85542
UBAP2	-0.126007	7.16528	-2.575	0.0112904	0.222584	-2.86994
MTHFSD	-0.126771	5.93005	-2.57938	0.0111562	0.222584	-2.86011
SGSM3	-0.129214	6.6709	-2.57912	0.0111642	0.222584	-2.8607
LOC100505715	-0.160859	3.52673	-2.57436	0.0113103	0.222584	-2.87139
GEMIN4	-0.168794	6.40423	-2.57294	0.0113541	0.222584	-2.87457
TMEM183B	-0.175671	6.78737	-2.57838	0.0111868	0.222584	-2.86236
PHKA1	-0.175955	5.42667	-2.57266	0.0113628	0.222584	-2.8752
ZNF559	-0.186674	5.89701	-2.57381	0.0113274	0.222584	-2.87263
CFDP1	-0.187831	7.21959	-2.57403	0.0113204	0.222584	-2.87212
TMCC1-AS1	-0.188354	5.48585	-2.57403	0.0113206	0.222584	-2.87214
KPNB1	-0.188767	7.76075	-2.57801	0.0111981	0.222584	-2.86319
NMRAL1	-0.191236	6.7218	-2.57252	0.0113673	0.222584	-2.87553
RPL23AP64	-0.204371	4.7482	-2.57232	0.0113735	0.222584	-2.87597
KMT2A	-0.206076	7.36352	-2.58086	0.0111111	0.222584	-2.85677
NPEPPS	-0.206194	7.502	-2.57971	0.0111462	0.222584	-2.85937
COIL	-0.232617	6.06475	-2.57609	0.011257	0.222584	-2.86751
RP3-323P24.3	-0.240388	3.43877	-2.57527	0.0112822	0.222584	-2.86935
NFAT5	-0.256068	8.03072	-2.57734	0.0112187	0.222584	-2.8647
COG3	-0.260323	6.7113	-2.57242	0.0113703	0.222584	-2.87575
DCTPP1	-0.260591	7.4834	-2.5725	0.0113678	0.222584	-2.87556
PAN3	-0.27783	7.48968	-2.57797	0.0111992	0.222584	-2.86327
JUP	-0.352996	7.86619	-2.57925	0.0111601	0.222584	-2.86039
SNORA36C	-0.542657	7.0685	-2.5743	0.0113122	0.222584	-2.87153
SNORA34	-0.580742	9.95026	-2.57284	0.0113572	0.222584	-2.8748
SNORD11B	-0.754665	5.2188	-2.57421	0.0113148	0.222584	-2.87172
BCL7B	0.205004	6.75121	2.5718	0.0113895	0.222679	-2.87713
EFS	-0.137547	6.41671	-2.57166	0.011394	0.222679	-2.87745
SRP72	-0.300606	8.82295	-2.57153	0.0113981	0.222679	-2.87775
PGA5	0.254449	5.5047	2.57073	0.0114229	0.223034	-2.87954
DACT1	0.226525	5.2003	2.57009	0.0114428	0.223036	-2.88097
BRMS1L	0.179791	5.06519	2.57047	0.011431	0.223036	-2.88012
RP11-127O4.3	0.164411	2.40931	2.57022	0.0114387	0.223036	-2.88068
KCNT2	0.342357	3.71773	2.56979	0.0114522	0.223089	-2.88164
PVRL3	0.314689	6.26918	2.56886	0.0114813	0.223398	-2.88373
MIR4475	0.187222	2.40422	2.56888	0.0114808	0.223398	-2.88369
LOC100133315	-0.196161	5.75945	-2.56861	0.0114892	0.223423	-2.8843
PLXND1	0.255237	7.37877	2.56814	0.0115037	0.223576	-2.88533
ARL2-SNX15	0.156026	6.72462	2.56779	0.0115148	0.223664	-2.88613
LMO4	-0.183301	6.85397	-2.56678	0.0115466	0.224152	-2.8884
RHOQ	0.444688	7.98642	2.56569	0.0115809	0.224302	-2.89084
MUM1L1	0.241518	4.53809	2.56609	0.0115682	0.224302	-2.88993
RPGR	0.238939	5.56113	2.56588	0.0115749	0.224302	-2.89041
LRIG3	-0.299752	7.5905	-2.56594	0.011573	0.224302	-2.89027
PIK3R5	0.139065	6.42432	2.56488	0.0116065	0.224576	-2.89265
KDM3B	-0.166664	8.12222	-2.56482	0.0116084	0.224576	-2.89279
DPY30	-0.137557	7.79524	-2.56385	0.0116391	0.224705	-2.89496
HIST1H2BJ	-0.216761	5.71121	-2.5643	0.0116248	0.224705	-2.89394
ZMYM2	-0.281459	7.02142	-2.56391	0.011637	0.224705	-2.8948
ZNF93	-0.332573	6.66546	-2.56376	0.0116417	0.224705	-2.89514
ZNF3	-0.185203	5.93282	-2.56311	0.0116626	0.224837	-2.89661
ZNF548	-0.21175	6.92256	-2.5633	0.0116564	0.224837	-2.89617
FLVCR1	-0.233269	5.43468	-2.56292	0.0116686	0.224837	-2.89703
TMEM181	-0.294551	7.26358	-2.56232	0.0116875	0.224945	-2.89837
CLDN7	-0.541342	7.40687	-2.5624	0.0116852	0.224945	-2.8982
TPO	0.186038	5.70605	2.56081	0.0117358	0.225184	-2.90175
IQCG	0.125215	5.23677	2.56067	0.01174	0.225184	-2.90205
UBE3D	-0.112993	4.94537	-2.56099	0.0117299	0.225184	-2.90134
TMEM159	-0.164815	6.27036	-2.5615	0.0117135	0.225184	-2.90019
SAV1	-0.23745	8.16294	-2.56142	0.0117162	0.225184	-2.90038
C9orf41	-0.266743	6.47188	-2.56092	0.0117321	0.225184	-2.90149
SNORA65	-1.12638	7.80959	-2.56033	0.011751	0.225266	-2.90282
TTC27	-0.259075	6.09383	-2.55972	0.0117704	0.225511	-2.90418
RNF138	-0.271811	6.52021	-2.55924	0.0117859	0.22568	-2.90526
PAXIP1	-0.159685	6.16082	-2.55898	0.0117943	0.225711	-2.90584
DBN1	0.215551	7.43698	2.55811	0.0118221	0.225988	-2.90778
NEBL	-0.387217	5.03445	-2.55816	0.0118206	0.225988	-2.90767
SCD	1.21173	9.25348	2.55728	0.011849	0.226122	-2.90964
EMP1	0.500698	10.4748	2.55643	0.0118761	0.226122	-2.91152
CTNND1	-0.214448	8.25687	-2.55668	0.011868	0.226122	-2.91096
FAM150B	-0.248761	5.69677	-2.55712	0.0118539	0.226122	-2.90998
AKAP9	-0.259623	7.22929	-2.55652	0.0118733	0.226122	-2.91132
PTPRT	-0.270858	5.88587	-2.55664	0.0118693	0.226122	-2.91105
HIST1H3D	-0.327715	2.54029	-2.55684	0.0118629	0.226122	-2.9106
FARS2	-0.109529	6.68154	-2.55613	0.0118859	0.226181	-2.9122
CDKN2B	0.527514	7.05565	2.55516	0.0119173	0.226437	-2.91436
LOC101928536	0.127902	2.58781	2.55514	0.0119179	0.226437	-2.9144
LOC100131289	-0.144471	4.77987	-2.55509	0.0119195	0.226437	-2.91452
SUMO1P1	0.169455	4.24383	2.55473	0.0119313	0.226457	-2.91533
NLE1	-0.147307	6.40533	-2.55464	0.011934	0.226457	-2.91551
MCM2	-0.171762	5.94582	-2.55392	0.0119573	0.226651	-2.91712
LOC646652	-0.332714	6.08841	-2.55391	0.0119577	0.226651	-2.91714
CTSLP8	0.193785	4.78289	2.55354	0.0119698	0.226753	-2.91797
FAH	0.404868	6.51618	2.55236	0.0120083	0.226855	-2.92061
RP11-420B22.1	0.224054	3.12535	2.55303	0.0119863	0.226855	-2.91911
RAB4B	0.100161	6.41237	2.5519	0.0120232	0.226855	-2.92163
C14orf159	-0.0824036	6.17136	-2.5518	0.0120264	0.226855	-2.92185
EHMT2	-0.10224	6.43812	-2.55172	0.012029	0.226855	-2.92202
PART1	-0.169421	4.16781	-2.55177	0.0120275	0.226855	-2.92192
EIF3I	-0.222789	8.20302	-2.552	0.0120199	0.226855	-2.9214
CHST9	-0.429771	4.93386	-2.55249	0.0120038	0.226855	-2.9203
LACTB	0.282472	5.86537	2.54961	0.0120979	0.227509	-2.92672
SATB2	0.154386	4.81486	2.54963	0.0120976	0.227509	-2.92669
MORC2	-0.14425	6.74949	-2.54984	0.0120904	0.227509	-2.92621
RPL23AP4	-0.232113	8.51839	-2.54967	0.012096	0.227509	-2.92659
ZNF85	-0.239971	5.95428	-2.54943	0.0121041	0.227509	-2.92714
TP63	-0.594256	6.73479	-2.55007	0.0120832	0.227509	-2.92572
CASK	-0.307459	6.63517	-2.54891	0.0121209	0.227698	-2.92828
SIGLEC1	0.218915	6.40153	2.54843	0.012137	0.227873	-2.92937
CR1	0.471951	5.45856	2.54673	0.0121928	0.228794	-2.93313
NELFCD	-0.121539	5.65824	-2.54624	0.012209	0.22897	-2.93422
ACE	0.193397	6.26386	2.54576	0.0122251	0.229042	-2.9353
HOXB3	0.143061	5.3618	2.54531	0.01224	0.229042	-2.93631
DNAJC4	-0.177628	7.12817	-2.54556	0.0122316	0.229042	-2.93574
DCP2	-0.268101	6.30709	-2.54542	0.0122363	0.229042	-2.93606
RP11-78O22.1	0.197081	2.40427	2.54505	0.0122486	0.229076	-2.93688
SLC29A3	0.136124	5.82837	2.54464	0.0122621	0.229201	-2.93779
SYNJ1	0.192284	5.88887	2.54392	0.0122861	0.229395	-2.93939
RP5-965F6.2	0.192253	3.88443	2.54399	0.0122837	0.229395	-2.93923
IVNS1ABP	-0.357881	7.36705	-2.54339	0.0123038	0.229598	-2.94057
DEPDC4	-0.123274	2.83549	-2.54268	0.0123272	0.229694	-2.94213
CASC15	-0.239216	5.0046	-2.54262	0.0123294	0.229694	-2.94228
WDR75	-0.284126	7.18619	-2.54296	0.0123181	0.229694	-2.94153
DEFB132	1.12313	5.81147	2.54184	0.0123555	0.230022	-2.94401
LINGO2	0.156694	3.15629	2.54123	0.0123759	0.230022	-2.94537
JAZF1	0.130233	6.166	2.54118	0.0123774	0.230022	-2.94547
ZNF790-AS1	-0.143726	5.09665	-2.54126	0.0123748	0.230022	-2.9453
IL1RL2	-0.194389	4.57399	-2.54107	0.0123811	0.230022	-2.94571
TMEM189	0.202551	7.28326	2.53998	0.0124179	0.230437	-2.94814
UBE3A	-0.221557	5.24836	-2.5399	0.0124203	0.230437	-2.9483
CITED4	-0.478708	7.50778	-2.5398	0.0124239	0.230437	-2.94854
TREM1	0.367615	4.58078	2.53934	0.0124393	0.230469	-2.94956
ORC2	-0.29801	6.37488	-2.53949	0.0124341	0.230469	-2.94922
SMPX	0.154885	2.62922	2.53894	0.0124525	0.230587	-2.95043
WBP2NL	-0.153945	4.1476	-2.53765	0.0124963	0.230916	-2.95331
NUMA1	-0.18457	8.14496	-2.53738	0.0125054	0.230916	-2.95391
TMEM9B-AS1	-0.210701	6.20827	-2.53739	0.012505	0.230916	-2.95388
NDRG3	-0.246799	8.06411	-2.5372	0.0125114	0.230916	-2.9543
LUC7L3	-0.322168	8.23067	-2.53722	0.0125108	0.230916	-2.95426
SNORA10	-0.68618	7.93128	-2.53802	0.0124838	0.230916	-2.95249
PLS3	0.353979	8.03212	2.53652	0.0125344	0.231087	-2.95581
PHF19	0.115494	5.95228	2.53655	0.0125335	0.231087	-2.95575
SNORA5A	-0.804822	8.30588	-2.53623	0.0125441	0.231141	-2.95644
TPSAB1	0.39172	7.78744	2.53573	0.0125612	0.231329	-2.95756
HIPK3	0.253945	8.72892	2.53502	0.0125854	0.23146	-2.95914
ZNF268	-0.239472	6.48776	-2.53491	0.0125889	0.23146	-2.95937
TNFRSF11A	-0.249078	6.2604	-2.53497	0.012587	0.23146	-2.95925
CNOT1	-0.268633	8.64603	-2.53454	0.0126017	0.231569	-2.9602
RP11-100L22.1	0.228837	3.25609	2.53421	0.012613	0.23165	-2.96093
L3MBTL4	-0.222887	5.6453	-2.53378	0.0126276	0.231666	-2.96188
ZNF254	-0.289457	7.12081	-2.53381	0.0126264	0.231666	-2.96181
SCARNA21	-0.397068	8.22445	-2.53352	0.0126364	0.231702	-2.96246
ZNF662	-0.155488	5.37891	-2.53292	0.012657	0.231953	-2.96379
FAM111B	-0.45604	4.26024	-2.5327	0.0126642	0.231959	-2.96426
ATP8B2	0.25447	6.97234	2.5323	0.0126779	0.232	-2.96514
CLDN4	-0.224186	6.19305	-2.53224	0.0126802	0.232	-2.96529
HOMER1	-0.359761	5.73776	-2.53137	0.0127099	0.232417	-2.96721
C6orf183	0.129817	3.87423	2.53063	0.0127352	0.232753	-2.96884
LOC101928154	0.208126	5.0472	2.53015	0.0127519	0.232932	-2.96992
CUL7	-0.148348	6.77424	-2.52995	0.0127588	0.232932	-2.97036
KCNAB1	0.365832	5.3789	2.52931	0.0127805	0.232951	-2.97176
NCKAP1L	0.35594	6.35798	2.5294	0.0127775	0.232951	-2.97156
RP11-6E9.4	-0.968691	5.02917	-2.52964	0.0127694	0.232951	-2.97104
MBOAT2	-0.440769	5.34856	-2.52851	0.0128084	0.233333	-2.97355
LINC00341	0.577155	6.07399	2.52736	0.012848	0.233397	-2.97608
ACADL	0.568268	4.74985	2.52603	0.012894	0.233397	-2.97901
RND1	0.43005	5.38623	2.52713	0.012856	0.233397	-2.97659
MYH1	0.283088	4.13918	2.52631	0.0128844	0.233397	-2.9784
MIR134	0.212493	5.84048	2.52719	0.0128538	0.233397	-2.97644
AC097499.1	0.143847	2.29837	2.52604	0.0128937	0.233397	-2.97899
MGAT1	0.136409	6.75028	2.52685	0.0128655	0.233397	-2.97719
PRPF38B	-0.198159	7.33538	-2.52626	0.012886	0.233397	-2.9785
PODXL	-0.248349	8.20506	-2.52601	0.012895	0.233397	-2.97907
EIF2S3	-0.287332	8.41964	-2.52749	0.0128434	0.233397	-2.97578
LOC283194	-0.325963	4.46839	-2.52751	0.0128428	0.233397	-2.97574
ZNF91	-0.326794	9.10894	-2.52709	0.0128573	0.233397	-2.97667
CDC14A	-0.250854	5.41557	-2.52554	0.0129113	0.233567	-2.9801
DDX17	-0.341908	9.3063	-2.52528	0.0129202	0.233604	-2.98067
SNORA73B	-0.539971	12.103	-2.52448	0.0129482	0.233984	-2.98244
RAB5C	0.163858	9.01992	2.52404	0.0129635	0.234135	-2.98341
CHAF1B	-0.309607	5.70248	-2.52281	0.0130065	0.234785	-2.98612
CST2	0.179707	5.83727	2.52243	0.0130197	0.234898	-2.98696
S1PR3	0.460629	6.49146	2.52159	0.0130491	0.235156	-2.98881
PDE4DIP	0.276449	6.43504	2.52123	0.0130619	0.235156	-2.98961
B3GALNT1	-0.116925	6.65059	-2.52125	0.013061	0.235156	-2.98955
GYLTL1B	-0.189703	6.59531	-2.5216	0.0130487	0.235156	-2.98878
HIST1H2BD	-0.41518	5.36624	-2.52096	0.0130713	0.2352	-2.9902
MIR3928	0.242008	6.02257	2.51991	0.0131081	0.235736	-2.9925
PPP1R3C	0.396898	6.06091	2.51867	0.0131522	0.235817	-2.99525
SLC25A20	0.229425	6.04265	2.51898	0.0131413	0.235817	-2.99457
GBP7	0.163449	4.16174	2.51824	0.0131673	0.235817	-2.9962
RP11-10L12.4	0.158265	5.66178	2.51939	0.0131266	0.235817	-2.99365
2021-03-01	0.105062	4.82406	2.51848	0.0131588	0.235817	-2.99566
ZNF627	-0.163074	6.8715	-2.51938	0.0131268	0.235817	-2.99367
KANSL2	-0.163546	6.05734	-2.51864	0.0131531	0.235817	-2.99531
INADL	-0.47382	6.83308	-2.5182	0.0131686	0.235817	-2.99627
RANBP3L	0.569478	4.93445	2.51716	0.0132055	0.236137	-2.99857
NISCH	-0.113548	7.1619	-2.51729	0.013201	0.236137	-2.99829
LRPPRC	-0.284645	7.5036	-2.51711	0.0132074	0.236137	-2.99869
AC006159.3	0.154425	2.35235	2.51634	0.0132347	0.2365	-3.00038
FGD2	0.133104	5.63806	2.51575	0.0132557	0.236624	-3.00168
MTBP	-0.252073	4.21595	-2.51591	0.0132501	0.236624	-3.00133
FAHD2B	-0.109918	6.04133	-2.51502	0.0132817	0.236859	-3.00328
YTHDC1	-0.216389	8.2894	-2.51498	0.0132829	0.236859	-3.00336
KIF1C	0.258076	6.98833	2.51449	0.0133006	0.237049	-3.00445
MED28	-0.268136	6.53713	-2.51281	0.0133608	0.237996	-3.00814
RNASE1	0.519747	8.25232	2.51238	0.0133762	0.238019	-3.00909
LRRC69	0.100089	3.03179	2.51256	0.0133695	0.238019	-3.00868
RNU7-123P	-0.185109	2.19695	-2.51218	0.0133833	0.238019	-3.00952
TMC4	-0.256028	6.64351	-2.5113	0.0134151	0.238459	-3.01147
MYOC	0.720303	6.24207	2.51103	0.0134248	0.238506	-3.01206
IL10RA	0.316071	6.67492	2.51054	0.0134424	0.238693	-3.01313
AC073254.1	0.180057	4.37662	2.51022	0.0134539	0.238772	-3.01383
MAOB	0.190175	5.46753	2.5099	0.0134652	0.238847	-3.01452
SIGLEC6	0.197428	5.14253	2.50932	0.0134864	0.239097	-3.01581
LRRC37A4P	-0.158998	5.89327	-2.50857	0.0135133	0.239448	-3.01744
TYW1B	-0.18448	6.35227	-2.50759	0.0135489	0.239842	-3.01959
TMEM238	-0.331342	6.29745	-2.50757	0.0135498	0.239842	-3.01965
RP11-240L7.4	0.178256	4.09865	2.50725	0.0135615	0.239924	-3.02036
SMIM10	0.300917	6.52418	2.50584	0.0136127	0.239966	-3.02344
FAM69A	0.29423	6.04896	2.50562	0.0136209	0.239966	-3.02393
IFFO1	0.151994	5.92923	2.5063	0.0135959	0.239966	-3.02243
ING5	-0.0914251	5.81388	-2.50597	0.0136079	0.239966	-3.02315
NFYA	-0.160946	6.7696	-2.50578	0.0136149	0.239966	-3.02357
PABPC1L	-0.161513	5.67099	-2.50667	0.0135825	0.239966	-3.02162
EDN1	-0.33332	6.21935	-2.50579	0.0136146	0.239966	-3.02355
HIST1H2BH	-0.333594	5.36357	-2.50639	0.0135927	0.239966	-3.02224
SLC29A4	0.374051	7.01209	2.50449	0.013662	0.240413	-3.02639
USP53	0.339631	8.0331	2.5046	0.0136579	0.240413	-3.02615
GCNT2	-0.341933	5.5352	-2.50434	0.0136676	0.240413	-3.02673
MAP3K14	0.122716	6.26864	2.50413	0.0136753	0.240424	-3.0272
P2RY14	0.637067	6.42515	2.50357	0.0136957	0.240627	-3.02841
AP1M2	-0.372494	6.1067	-2.50342	0.0137012	0.240627	-3.02874
NPR3	0.926545	6.37521	2.50114	0.013785	0.241571	-3.03373
TESC	-0.236715	6.15307	-2.50079	0.0137979	0.241571	-3.0345
SNORD113-3	-0.255894	3.13521	-2.50094	0.0137924	0.241571	-3.03417
GALNT1	-0.322871	7.54986	-2.50173	0.0137634	0.241571	-3.03245
RNF39	-0.326498	6.43798	-2.50123	0.0137816	0.241571	-3.03353
OFD1	-0.373104	6.44588	-2.50115	0.0137848	0.241571	-3.03372
LINC00630	-0.14857	5.06548	-2.50053	0.0138074	0.241611	-3.03506
LOC101928596	0.206746	3.3481	2.49895	0.013866	0.242385	-3.03852
CYP39A1	-0.332464	4.63467	-2.4991	0.0138606	0.242385	-3.03821
MTHFR	0.104774	6.24092	2.49854	0.0138811	0.242524	-3.03942
KRT6B	0.591516	6.59472	2.49817	0.0138949	0.24264	-3.04023
TMEM120A	0.183117	6.75189	2.49688	0.0139428	0.243097	-3.04304
LINC00518	0.12257	2.79761	2.49727	0.0139285	0.243097	-3.0422
INSR	-0.279211	7.28155	-2.49697	0.0139396	0.243097	-3.04286
CENPK	-0.212925	3.04889	-2.49657	0.0139543	0.243172	-3.04372
GPATCH2L	-0.151087	5.48314	-2.49613	0.0139708	0.243335	-3.04469
RP11-359N11.2	0.124906	2.16151	2.49526	0.0140034	0.243776	-3.04659
KLHL31	0.892483	5.71678	2.49495	0.0140151	0.243821	-3.04727
ARNT2	-0.167081	5.57601	-2.4948	0.0140204	0.243821	-3.04758
RBM5	-0.219255	7.61818	-2.49408	0.0140474	0.244164	-3.04916
PAPSS2	0.44639	7.05328	2.49322	0.0140798	0.24435	-3.05104
SUV39H2	-0.21084	5.02204	-2.49346	0.0140709	0.24435	-3.05052
HNRNPA1	-0.25924	9.9451	-2.49341	0.0140726	0.24435	-3.05063
KB-431C1.4	-0.161735	3.69692	-2.49287	0.014093	0.244453	-3.05181
GABRP	-1.14348	8.95155	-2.49253	0.0141057	0.244546	-3.05254
SCAF8	-0.19776	8.09873	-2.49234	0.014113	0.244548	-3.05297
TUBB2B	0.213047	6.72342	2.49157	0.0141421	0.244926	-3.05465
PARGP1	-0.249473	7.29487	-2.49136	0.0141498	0.244934	-3.0551
SHPRH	-0.217628	6.4169	-2.49101	0.0141631	0.245039	-3.05587
RP5-837I24.6	0.231937	3.70993	2.49052	0.0141817	0.245116	-3.05694
SLC7A1	-0.20825	6.57408	-2.49051	0.0141821	0.245116	-3.05696
EVC2	0.149826	5.52029	2.48979	0.0142094	0.245375	-3.05854
ZNF625	-0.230933	6.26738	-2.48973	0.0142117	0.245375	-3.05867
FCAR	0.23959	4.2003	2.48936	0.0142254	0.245486	-3.05945
TMEM213	-0.281696	5.49345	-2.48916	0.0142333	0.245497	-3.05991
LOC100133920	0.58312	5.51946	2.48852	0.0142575	0.245538	-3.0613
CSF3	0.251254	6.24788	2.48872	0.0142498	0.245538	-3.06086
ARHGEF26-AS1	-0.135536	4.72383	-2.48869	0.014251	0.245538	-3.06092
WNK3	-0.206908	3.92924	-2.48811	0.0142731	0.245555	-3.06219
TRIL	-0.315262	6.84541	-2.48815	0.0142715	0.245555	-3.0621
ITGA7	0.366692	7.04531	2.48382	0.0144371	0.245562	-3.07153
AC017002.2	0.312591	5.42772	2.48636	0.0143399	0.245562	-3.06601
AP001604.3	0.24524	3.32875	2.48614	0.014348	0.245562	-3.06647
RCAN3AS	0.215669	4.10709	2.48529	0.0143807	0.245562	-3.06833
NAV2-AS4	0.201749	3.71025	2.48439	0.0144152	0.245562	-3.07029
RP11-438C19.1	0.200068	3.38673	2.48682	0.0143224	0.245562	-3.06501
RP11-2N5.2	0.193013	3.90958	2.48527	0.0143814	0.245562	-3.06837
GABARAPL3	0.16338	6.67457	2.48492	0.0143948	0.245562	-3.06913
AL132796.1	0.159018	3.20178	2.48602	0.0143528	0.245562	-3.06674
VPS4A	0.153428	7.41863	2.48785	0.0142828	0.245562	-3.06275
LYSMD2	0.104297	5.02474	2.48613	0.0143485	0.245562	-3.0665
SUFU	-0.101324	6.06895	-2.48597	0.0143547	0.245562	-3.06685
AKAP8L	-0.119828	7.65767	-2.48456	0.0144088	0.245562	-3.06993
RAE1	-0.129091	6.03465	-2.48529	0.0143806	0.245562	-3.06832
LOC100288778	-0.148628	7.75444	-2.48345	0.0144513	0.245562	-3.07233
VASH2	-0.150304	5.48565	-2.48455	0.0144092	0.245562	-3.06995
FAM227A	-0.163032	3.84102	-2.48438	0.0144155	0.245562	-3.0703
ANP32A-IT1	-0.215446	4.10258	-2.48567	0.0143661	0.245562	-3.0675
RAD18	-0.238887	5.44162	-2.48603	0.0143525	0.245562	-3.06673
TTK	-0.261821	3.87858	-2.48334	0.0144555	0.245562	-3.07257
MIR32	-0.277912	3.75214	-2.48636	0.0143399	0.245562	-3.06601
FANCL	-0.347725	5.67904	-2.4848	0.0143994	0.245562	-3.06939
RPS13	-0.34997	10.0134	-2.48336	0.0144547	0.245562	-3.07252
SNORA48	-0.485918	12.0848	-2.48354	0.0144478	0.245562	-3.07213
SORL1	-0.514183	6.71127	-2.48363	0.0144445	0.245562	-3.07195
COX7A1	0.328988	7.94912	2.48315	0.0144628	0.245562	-3.07298
BSPRY	-0.39231	6.62544	-2.48215	0.0145014	0.246093	-3.07516
ALOX5AP	0.320883	6.40203	2.48184	0.0145135	0.246131	-3.07584
CPVL	0.270632	6.58021	2.48115	0.0145401	0.246131	-3.07734
DOCK1	-0.177263	7.91499	-2.4813	0.0145341	0.246131	-3.077
CHD6	-0.213134	7.04094	-2.48116	0.0145395	0.246131	-3.0773
CDCP1	-0.343253	6.57351	-2.48161	0.0145223	0.246131	-3.07634
TCN1	0.9478	5.00978	2.48054	0.0145637	0.246407	-3.07867
FAM89A	0.466363	5.86757	2.48011	0.0145803	0.246475	-3.0796
CRYBB1	0.15164	5.25216	2.48006	0.0145824	0.246475	-3.07971
CXCR2	0.228784	4.42804	2.47873	0.014634	0.246976	-3.0826
PVRL4	-0.340786	6.64478	-2.47901	0.014623	0.246976	-3.08198
TAS2R14	-0.393298	5.17693	-2.47875	0.0146331	0.246976	-3.08255
RP11-222A11.1	-0.203074	4.31262	-2.47802	0.0146614	0.247314	-3.08413
[truncated: 2,194 more rows]
