# Supplementary material for: Luminal epithelial cells integrate variable responses to aging into stereotypical changes that underlie breast cancer susceptibility
Source: eLife. 2024 Nov 15;13:e95720. doi: 10.7554/eLife.95720 (PMC11723586; doi:10.7554/eLife.95720)
Supplement: Figure 6—source data 1. — (A) Curated list of genes encoding for cell-surface junction proteins. Gene Families (HGNC) and functional roles annotated. (B) Lepage test of age-dependent modulation (p<0.05) of genes encoding for junction proteins in LEPs and MEPs. [file elife-95720-fig6-data1.xlsx]

## Sheet: A Jxnal Protein Curated List
HGNC.ID	Approved.symbol	Approved.name	Previous.symbols	Alias.symbols	Chromosome	Group.ID	Gene.Family	Functional.Role	Hierarchy1	Hierarchy2	Hierarchy3	Hierarchy4
HGNC:13733	CDH23	cadherin related 23	DFNB12, USH1D	CDHR23	10q22.1	24	Cadherin related	CAMs	Cell Adhesion Molecules	Cadherins	Cadherin related
HGNC:14550	CDHR1	cadherin related family member 1	PCDH21	KIAA1775, CORD15, RP65	10q23.1	24	Cadherin related	CAMs	Cell Adhesion Molecules	Cadherins	Cadherin related
HGNC:18231	CDHR2	cadherin related family member 2	PCDH24	PC-LKC, FLJ20124, FLJ20383, PCLKC	5q35.2	24	Cadherin related	CAMs	Cell Adhesion Molecules	Cadherins	Cadherin related
HGNC:26308	CDHR3	cadherin related family member 3		FLJ44366, FLJ23834, CDH28	7q22.3	24	Cadherin related	CAMs	Cell Adhesion Molecules	Cadherins	Cadherin related
HGNC:34527	CDHR4	cadherin related family member 4	CDH29	VLLR9392	3p21.31	24	Cadherin related	CAMs	Cell Adhesion Molecules	Cadherins	Cadherin related
HGNC:7521	CDHR5	cadherin related family member 5	MUCDHL, MUPCDH	FLJ20219, MU-PCDH	11p15.5	24	Cadherin related	CAMs	Cell Adhesion Molecules	Cadherins	Cadherin related
HGNC:17447	CLSTN1	calsyntenin 1		CSTN1, KIAA0911, CDHR12	1p36.22	24	Cadherin related	CAMs	Cell Adhesion Molecules	Cadherins	Cadherin related
HGNC:17448	CLSTN2	calsyntenin 2		CSTN2, CS2, FLJ39113, CDHR13	3q23	24	Cadherin related	CAMs	Cell Adhesion Molecules	Cadherins	Cadherin related
HGNC:18371	CLSTN3	calsyntenin 3		CSTN3, KIAA0726, CDHR14	12p13.31	24	Cadherin related	CAMs	Cell Adhesion Molecules	Cadherins	Cadherin related
HGNC:13681	DCHS1	dachsous cadherin-related 1	CDH25, PCDH16	FIB1, KIAA1773, FLJ11790, CDHR6	11p15.4	24	Cadherin related	CAMs	Cell Adhesion Molecules	Cadherins	Cadherin related
HGNC:23111	DCHS2	dachsous cadherin-related 2	CDH27, PCDH23	CDHJ, FLJ20047, PCDHJ, CDHR7	4q31.3	24	Cadherin related	CAMs	Cell Adhesion Molecules	Cadherins	Cadherin related
HGNC:3595	FAT1	FAT atypical cadherin 1	FAT	CDHF7, CDHR8	4q35.2	24	Cadherin related	CAMs	Cell Adhesion Molecules	Cadherins	Cadherin related
HGNC:3596	FAT2	FAT atypical cadherin 2		MEGF1, CDHF8, HFAT2, CDHR9	5q33.1	24	Cadherin related	CAMs	Cell Adhesion Molecules	Cadherins	Cadherin related
HGNC:23112	FAT3	FAT atypical cadherin 3		KIAA1989, CDHF15, CDHR10	11q14.3	24	Cadherin related	CAMs	Cell Adhesion Molecules	Cadherins	Cadherin related
HGNC:23109	FAT4	FAT atypical cadherin 4		CDHF14, FAT-J, CDHR11	4q28.1	24	Cadherin related	CAMs	Cell Adhesion Molecules	Cadherins	Cadherin related
HGNC:14674	PCDH15	protocadherin related 15	USH1F, DFNB23	CDHR15	10q21.1	24	Cadherin related	CAMs	Cell Adhesion Molecules	Cadherins	Cadherin related
HGNC:9967	RET	ret proto-oncogene	HSCR1, MEN2A, MTC1, MEN2B	PTC, CDHF12, RET51, CDHR16	10q11.21	24	Cadherin related	CAMs	Cell Adhesion Molecules	Cadherins	Cadherin related
HGNC:1755	CDH16	cadherin 16			16q22.1	1187	7D cadherins	CAMs	Cell Adhesion Molecules	Cadherins	Major cadherins	7D cadherins
HGNC:1756	CDH17	cadherin 17		HPT-1, cadherin	8q22.1	1187	7D cadherins	CAMs	Cell Adhesion Molecules	Cadherins	Major cadherins	7D cadherins
HGNC:1850	CELSR1	cadherin EGF LAG seven-pass G-type receptor 1		ME2, HFMI2, FMI2, CDHF9, ADGRC1	22q13.31	1189	CELSR cadherins	CAMs	Cell Adhesion Molecules	Cadherins	Major cadherins	CELSR cadherins
HGNC:3231	CELSR2	cadherin EGF LAG seven-pass G-type receptor 2	EGFL2	KIAA0279, MEGF3, Flamingo1, CDHF10, ADGRC2	1p13.3	1189	CELSR cadherins	CAMs	Cell Adhesion Molecules	Cadherins	Major cadherins	CELSR cadherins
HGNC:3230	CELSR3	cadherin EGF LAG seven-pass G-type receptor 3	EGFL1	MEGF2, HFMI1, FMI1, CDHF11, ADGRC3	3p21.31	1189	CELSR cadherins	CAMs	Cell Adhesion Molecules	Cadherins	Major cadherins	CELSR cadherins
HGNC:3035	DSC1	desmocollin 1		CDHF1	18q12.1	1188	Desmosomal cadherins	Desmosomes	Cell Adhesion Molecules	Cadherins	Major cadherins	Desmosomal cadherins
HGNC:3036	DSC2	desmocollin 2	DSC3	CDHF2	18q12.1	1188	Desmosomal cadherins	Desmosomes	Cell Adhesion Molecules	Cadherins	Major cadherins	Desmosomal cadherins
HGNC:3037	DSC3	desmocollin 3	DSC4	CDHF3, DSC, DSC1, DSC2	18q12.1	1188	Desmosomal cadherins	Desmosomes	Cell Adhesion Molecules	Cadherins	Major cadherins	Desmosomal cadherins
HGNC:3048	DSG1	desmoglein 1	DSG	CDHF4	18q12.1	1188	Desmosomal cadherins	Desmosomes	Cell Adhesion Molecules	Cadherins	Major cadherins	Desmosomal cadherins
HGNC:3049	DSG2	desmoglein 2		CDHF5	18q12.1	1188	Desmosomal cadherins	Desmosomes	Cell Adhesion Molecules	Cadherins	Major cadherins	Desmosomal cadherins
HGNC:3050	DSG3	desmoglein 3		CDHF6	18q12.1	1188	Desmosomal cadherins	Desmosomes	Cell Adhesion Molecules	Cadherins	Major cadherins	Desmosomal cadherins
HGNC:21307	DSG4	desmoglein 4		CDHF13, LAH	18q12.1	1188	Desmosomal cadherins	Desmosomes	Cell Adhesion Molecules	Cadherins	Major cadherins	Desmosomal cadherins
HGNC:1753	CDH13	cadherin 13		CDHH	16q23.3	18	Major cadherins	CAMs	Cell Adhesion Molecules	Cadherins	Major cadherins
HGNC:15902	CDH26	cadherin 26		VR20	20q13.33	18	Major cadherins	CAMs	Cell Adhesion Molecules	Cadherins	Major cadherins
HGNC:1748	CDH1	cadherin 1	UVO	uvomorulin, CD324	16q22.1	1185	Type I classical cadherins	Adherens Junction	Cell Adhesion Molecules	Cadherins	Major cadherins	Type I classical cadherins
HGNC:1754	CDH15	cadherin 15	CDH3, CDH14		16q24.3	1185	Type I classical cadherins	CAMs	Cell Adhesion Molecules	Cadherins	Major cadherins	Type I classical cadherins
HGNC:1759	CDH2	cadherin 2	NCAD	CDHN, CD325	18q12.1	1185	Type I classical cadherins	CAMs	Cell Adhesion Molecules	Cadherins	Major cadherins	Type I classical cadherins
HGNC:1762	CDH3	cadherin 3		CDHP, PCAD	16q22.1	1185	Type I classical cadherins	CAMs	Cell Adhesion Molecules	Cadherins	Major cadherins	Type I classical cadherins
HGNC:1763	CDH4	cadherin 4			20q13.33	1185	Type I classical cadherins	CAMs	Cell Adhesion Molecules	Cadherins	Major cadherins	Type I classical cadherins
HGNC:1749	CDH10	cadherin 10			5p14.2-p14.1	1186	Type II classical cadherins	CAMs	Cell Adhesion Molecules	Cadherins	Major cadherins	Type II classical cadherins
HGNC:1750	CDH11	cadherin 11		OB, CAD11	16q21	1186	Type II classical cadherins	CAMs	Cell Adhesion Molecules	Cadherins	Major cadherins	Type II classical cadherins
HGNC:1751	CDH12	cadherin 12		Br-cadherin, CDHB	5p14.3	1186	Type II classical cadherins	CAMs	Cell Adhesion Molecules	Cadherins	Major cadherins	Type II classical cadherins
HGNC:1757	CDH18	cadherin 18		CDH14, EY-CADHERIN	5p14.3	1186	Type II classical cadherins	CAMs	Cell Adhesion Molecules	Cadherins	Major cadherins	Type II classical cadherins
HGNC:1758	CDH19	cadherin 19		CDH7	18q22.1	1186	Type II classical cadherins	CAMs	Cell Adhesion Molecules	Cadherins	Major cadherins	Type II classical cadherins
HGNC:1760	CDH20	cadherin 20		CDH7L3, Cdh7	18q21.33	1186	Type II classical cadherins	CAMs	Cell Adhesion Molecules	Cadherins	Major cadherins	Type II classical cadherins
HGNC:13251	CDH22	cadherin 22	C20orf25	dJ998H6.1	20q13.12	1186	Type II classical cadherins	CAMs	Cell Adhesion Molecules	Cadherins	Major cadherins	Type II classical cadherins
HGNC:14265	CDH24	cadherin 24		CDH11L	14q11.2	1186	Type II classical cadherins	CAMs	Cell Adhesion Molecules	Cadherins	Major cadherins	Type II classical cadherins
HGNC:1764	CDH5	cadherin 5		7B4, CD144	16q21	1186	Type II classical cadherins	CAMs	Cell Adhesion Molecules	Cadherins	Major cadherins	Type II classical cadherins
HGNC:1765	CDH6	cadherin 6			5p13.3	1186	Type II classical cadherins	CAMs	Cell Adhesion Molecules	Cadherins	Major cadherins	Type II classical cadherins
HGNC:1766	CDH7	cadherin 7			18q22.1	1186	Type II classical cadherins	CAMs	Cell Adhesion Molecules	Cadherins	Major cadherins	Type II classical cadherins
HGNC:1767	CDH8	cadherin 8			16q21	1186	Type II classical cadherins	CAMs	Cell Adhesion Molecules	Cadherins	Major cadherins	Type II classical cadherins
HGNC:1768	CDH9	cadherin 9			5p14.1	1186	Type II classical cadherins	CAMs	Cell Adhesion Molecules	Cadherins	Major cadherins	Type II classical cadherins
HGNC:8662	PCDHA@	protocadherin alpha cluster, complex locus	CNRS1	CNR1	5q31	20	Clustered protocadherins	CAMs	Cell Adhesion Molecules	Cadherins	Protocadherins	Clustered protocadherins
HGNC:8663	PCDHA1	protocadherin alpha 1			5q31.3	20	Clustered protocadherins	CAMs	Cell Adhesion Molecules	Cadherins	Protocadherins	Clustered protocadherins
HGNC:8664	PCDHA10	protocadherin alpha 10	CNRS8	CNR8, CRNR8, CNRN8, PCDH-ALPHA10	5q31.3	20	Clustered protocadherins	CAMs	Cell Adhesion Molecules	Cadherins	Protocadherins	Clustered protocadherins
HGNC:8665	PCDHA11	protocadherin alpha 11	CNRS7	CNR7, CRNR7, CNRN7, PCDH-ALPHA11	5q31.3	20	Clustered protocadherins	CAMs	Cell Adhesion Molecules	Cadherins	Protocadherins	Clustered protocadherins
HGNC:8666	PCDHA12	protocadherin alpha 12		PCDH-ALPHA12	5q31.3	20	Clustered protocadherins	CAMs	Cell Adhesion Molecules	Cadherins	Protocadherins	Clustered protocadherins
HGNC:8667	PCDHA13	protocadherin alpha 13	CNRS5	CNR5, CRNR5, CNRN5, PCDH-ALPHA13	5q31.3	20	Clustered protocadherins	CAMs	Cell Adhesion Molecules	Cadherins	Protocadherins	Clustered protocadherins
HGNC:2163	PCDHA14	protocadherin alpha 14 pseudogene	CNRS3	CNR3, CRNR3, PCDH-PSI4	5q31.3	20	Clustered protocadherins	CAMs	Cell Adhesion Molecules	Cadherins	Protocadherins	Clustered protocadherins
HGNC:8668	PCDHA2	protocadherin alpha 2			5q31.3	20	Clustered protocadherins	CAMs	Cell Adhesion Molecules	Cadherins	Protocadherins	Clustered protocadherins
HGNC:8669	PCDHA3	protocadherin alpha 3		PCDH-ALPHA3	5q31.3	20	Clustered protocadherins	CAMs	Cell Adhesion Molecules	Cadherins	Protocadherins	Clustered protocadherins
HGNC:8670	PCDHA4	protocadherin alpha 4		CNR1, CRNR1, PCDH-ALPHA4, CNRN1	5q31.3	20	Clustered protocadherins	CAMs	Cell Adhesion Molecules	Cadherins	Protocadherins	Clustered protocadherins
HGNC:8671	PCDHA5	protocadherin alpha 5	CNRS6	CNR6, CRNR6, CNRN6, PCDH-ALPHA5	5q31.3	20	Clustered protocadherins	CAMs	Cell Adhesion Molecules	Cadherins	Protocadherins	Clustered protocadherins
HGNC:8672	PCDHA6	protocadherin alpha 6	CNRS2	CNR2, CRNR2, PCDH-ALPHA6	5q31.3	20	Clustered protocadherins	CAMs	Cell Adhesion Molecules	Cadherins	Protocadherins	Clustered protocadherins
HGNC:8673	PCDHA7	protocadherin alpha 7	CNRS4	CNR4, CRNR4	5q31.3	20	Clustered protocadherins	CAMs	Cell Adhesion Molecules	Cadherins	Protocadherins	Clustered protocadherins
HGNC:8674	PCDHA8	protocadherin alpha 8			5q31.3	20	Clustered protocadherins	CAMs	Cell Adhesion Molecules	Cadherins	Protocadherins	Clustered protocadherins
HGNC:8675	PCDHA9	protocadherin alpha 9		KIAA0345, PCDH-ALPHA9	5q31.3	20	Clustered protocadherins	CAMs	Cell Adhesion Molecules	Cadherins	Protocadherins	Clustered protocadherins
HGNC:8676	PCDHAC1	protocadherin alpha subfamily C, 1			5q31.3	20	Clustered protocadherins	CAMs	Cell Adhesion Molecules	Cadherins	Protocadherins	Clustered protocadherins
HGNC:8677	PCDHAC2	protocadherin alpha subfamily C, 2		PCDH-ALPHA-C2	5q31.3	20	Clustered protocadherins	CAMs	Cell Adhesion Molecules	Cadherins	Protocadherins	Clustered protocadherins
HGNC:8678	PCDHACT	protocadherin alpha constant		PCDHAC	5q31	20	Clustered protocadherins	CAMs	Cell Adhesion Molecules	Cadherins	Protocadherins	Clustered protocadherins
HGNC:8679	PCDHB@	protocadherin beta cluster		PCDH3	5q31	20	Clustered protocadherins	CAMs	Cell Adhesion Molecules	Cadherins	Protocadherins	Clustered protocadherins
HGNC:8680	PCDHB1	protocadherin beta 1		PCDH-BETA1	5q31.3	20	Clustered protocadherins	CAMs	Cell Adhesion Molecules	Cadherins	Protocadherins	Clustered protocadherins
HGNC:8681	PCDHB10	protocadherin beta 10			5q31.3	20	Clustered protocadherins	CAMs	Cell Adhesion Molecules	Cadherins	Protocadherins	Clustered protocadherins
HGNC:8682	PCDHB11	protocadherin beta 11		PCDH-BETA11, ME2	5q31.3	20	Clustered protocadherins	CAMs	Cell Adhesion Molecules	Cadherins	Protocadherins	Clustered protocadherins
HGNC:8683	PCDHB12	protocadherin beta 12		PCDH-BETA12	5q31.3	20	Clustered protocadherins	CAMs	Cell Adhesion Molecules	Cadherins	Protocadherins	Clustered protocadherins
HGNC:8684	PCDHB13	protocadherin beta 13		PCDH-BETA13	5q31.3	20	Clustered protocadherins	CAMs	Cell Adhesion Molecules	Cadherins	Protocadherins	Clustered protocadherins
HGNC:8685	PCDHB14	protocadherin beta 14		PCDH-BETA14	5q31.3	20	Clustered protocadherins	CAMs	Cell Adhesion Molecules	Cadherins	Protocadherins	Clustered protocadherins
HGNC:8686	PCDHB15	protocadherin beta 15		PCDH-BETA15	5q31.3	20	Clustered protocadherins	CAMs	Cell Adhesion Molecules	Cadherins	Protocadherins	Clustered protocadherins
HGNC:14546	PCDHB16	protocadherin beta 16		PCDHB8a, PCDH3X, KIAA1621, PCDH-BETA16, ME1	5q31.3	20	Clustered protocadherins	CAMs	Cell Adhesion Molecules	Cadherins	Protocadherins	Clustered protocadherins
HGNC:14547	PCDHB17P	protocadherin beta 17 pseudogene	PCDHB17	PCDH-psi1	5q31.3	20	Clustered protocadherins	CAMs	Cell Adhesion Molecules	Cadherins	Protocadherins	Clustered protocadherins
HGNC:14548	PCDHB18P	protocadherin beta 18 pseudogene	PCDHB18	PCDH-psi2	5q31.3	20	Clustered protocadherins	CAMs	Cell Adhesion Molecules	Cadherins	Protocadherins	Clustered protocadherins
HGNC:14549	PCDHB19P	protocadherin beta 19 pseudogene		PCDH-PSI5	5q31.3	20	Clustered protocadherins	CAMs	Cell Adhesion Molecules	Cadherins	Protocadherins	Clustered protocadherins
HGNC:8687	PCDHB2	protocadherin beta 2		PCDH-BETA2	5q31.3	20	Clustered protocadherins	CAMs	Cell Adhesion Molecules	Cadherins	Protocadherins	Clustered protocadherins
HGNC:8688	PCDHB3	protocadherin beta 3		PCDH-BETA3	5q31.3	20	Clustered protocadherins	CAMs	Cell Adhesion Molecules	Cadherins	Protocadherins	Clustered protocadherins
HGNC:8689	PCDHB4	protocadherin beta 4		PCDH-BETA4	5q31.3	20	Clustered protocadherins	CAMs	Cell Adhesion Molecules	Cadherins	Protocadherins	Clustered protocadherins
HGNC:8690	PCDHB5	protocadherin beta 5		DKFZp586B0217, PCDH-BETA5	5q31.3	20	Clustered protocadherins	CAMs	Cell Adhesion Molecules	Cadherins	Protocadherins	Clustered protocadherins
HGNC:8691	PCDHB6	protocadherin beta 6		PCDH-BETA6	5q31.3	20	Clustered protocadherins	CAMs	Cell Adhesion Molecules	Cadherins	Protocadherins	Clustered protocadherins
HGNC:8692	PCDHB7	protocadherin beta 7		PCDH-BETA7	5q31.3	20	Clustered protocadherins	CAMs	Cell Adhesion Molecules	Cadherins	Protocadherins	Clustered protocadherins
HGNC:8693	PCDHB8	protocadherin beta 8		PCDH-BETA8, PCDH3I	5q31.3	20	Clustered protocadherins	CAMs	Cell Adhesion Molecules	Cadherins	Protocadherins	Clustered protocadherins
HGNC:8694	PCDHB9	protocadherin beta 9		PCDH-BETA9, PCDH3H	5q31.3	20	Clustered protocadherins	CAMs	Cell Adhesion Molecules	Cadherins	Protocadherins	Clustered protocadherins
HGNC:8695	PCDHG@	protocadherin gamma cluster		PCDH2, PCDH4	5q31	20	Clustered protocadherins	CAMs	Cell Adhesion Molecules	Cadherins	Protocadherins	Clustered protocadherins
HGNC:8696	PCDHGA1	protocadherin gamma subfamily A, 1		PCDH-GAMMA-A1	5q31	20	Clustered protocadherins	CAMs	Cell Adhesion Molecules	Cadherins	Protocadherins	Clustered protocadherins
HGNC:8697	PCDHGA10	protocadherin gamma subfamily A, 10		PCDH-GAMMA-A10	5q31.3	20	Clustered protocadherins	CAMs	Cell Adhesion Molecules	Cadherins	Protocadherins	Clustered protocadherins
HGNC:8698	PCDHGA11	protocadherin gamma subfamily A, 11		PCDH-GAMMA-A11	5q31.3	20	Clustered protocadherins	CAMs	Cell Adhesion Molecules	Cadherins	Protocadherins	Clustered protocadherins
HGNC:8699	PCDHGA12	protocadherin gamma subfamily A, 12	CDH21	KIAA0588, FIB3, PCDH-GAMMA-A12	5q31.3	20	Clustered protocadherins	CAMs	Cell Adhesion Molecules	Cadherins	Protocadherins	Clustered protocadherins
HGNC:8700	PCDHGA2	protocadherin gamma subfamily A, 2		PCDH-GAMMA-A2	5q31.3	20	Clustered protocadherins	CAMs	Cell Adhesion Molecules	Cadherins	Protocadherins	Clustered protocadherins
HGNC:8701	PCDHGA3	protocadherin gamma subfamily A, 3		PCDH-GAMMA-A3	5q31.3	20	Clustered protocadherins	CAMs	Cell Adhesion Molecules	Cadherins	Protocadherins	Clustered protocadherins
HGNC:8702	PCDHGA4	protocadherin gamma subfamily A, 4		PCDH-GAMMA-A4	5q31	20	Clustered protocadherins	CAMs	Cell Adhesion Molecules	Cadherins	Protocadherins	Clustered protocadherins
HGNC:8703	PCDHGA5	protocadherin gamma subfamily A, 5		CDH-GAMMA-A5, ME3, PCDH-GAMMA-A5	5q31	20	Clustered protocadherins	CAMs	Cell Adhesion Molecules	Cadherins	Protocadherins	Clustered protocadherins
HGNC:8704	PCDHGA6	protocadherin gamma subfamily A, 6		PCDH-GAMMA-A6	5q31	20	Clustered protocadherins	CAMs	Cell Adhesion Molecules	Cadherins	Protocadherins	Clustered protocadherins
HGNC:8705	PCDHGA7	protocadherin gamma subfamily A, 7		PCDH-GAMMA-A7	5q31	20	Clustered protocadherins	CAMs	Cell Adhesion Molecules	Cadherins	Protocadherins	Clustered protocadherins
HGNC:8706	PCDHGA8	protocadherin gamma subfamily A, 8		KIAA0327, PCDH-GAMMA-A8	5q31.3	20	Clustered protocadherins	CAMs	Cell Adhesion Molecules	Cadherins	Protocadherins	Clustered protocadherins
HGNC:8707	PCDHGA9	protocadherin gamma subfamily A, 9		PCDH-GAMMA-A9	5q31	20	Clustered protocadherins	CAMs	Cell Adhesion Molecules	Cadherins	Protocadherins	Clustered protocadherins
HGNC:8708	PCDHGB1	protocadherin gamma subfamily B, 1		PCDH-GAMMA-B1	5q31	20	Clustered protocadherins	CAMs	Cell Adhesion Molecules	Cadherins	Protocadherins	Clustered protocadherins
HGNC:8709	PCDHGB2	protocadherin gamma subfamily B, 2		PCDH-GAMMA-B2	5q31	20	Clustered protocadherins	CAMs	Cell Adhesion Molecules	Cadherins	Protocadherins	Clustered protocadherins
HGNC:8710	PCDHGB3	protocadherin gamma subfamily B, 3		PCDH-GAMMA-B3	5q31	20	Clustered protocadherins	CAMs	Cell Adhesion Molecules	Cadherins	Protocadherins	Clustered protocadherins
HGNC:8711	PCDHGB4	protocadherin gamma subfamily B, 4		FIB2, CDH20, PCDH-GAMMA-B4	5q31	20	Clustered protocadherins	CAMs	Cell Adhesion Molecules	Cadherins	Protocadherins	Clustered protocadherins
HGNC:8712	PCDHGB5	protocadherin gamma subfamily B, 5		PCDH-GAMMA-B5	5q31	20	Clustered protocadherins	CAMs	Cell Adhesion Molecules	Cadherins	Protocadherins	Clustered protocadherins
HGNC:8713	PCDHGB6	protocadherin gamma subfamily B, 6		PCDH-GAMMA-B6	5q31	20	Clustered protocadherins	CAMs	Cell Adhesion Molecules	Cadherins	Protocadherins	Clustered protocadherins
HGNC:8714	PCDHGB7	protocadherin gamma subfamily B, 7		ME6, PCDH-GAMMA-B7	5q31.3	20	Clustered protocadherins	CAMs	Cell Adhesion Molecules	Cadherins	Protocadherins	Clustered protocadherins
HGNC:8715	PCDHGB8P	protocadherin gamma subfamily B, 8 pseudogene		PCDH-PSI3	5q31.3	20	Clustered protocadherins	CAMs	Cell Adhesion Molecules	Cadherins	Protocadherins	Clustered protocadherins
HGNC:15688	PCDHGB9P	protocadherin gamma subfamily B, 9 pseudogene		PSI6	5q31.3	20	Clustered protocadherins	CAMs	Cell Adhesion Molecules	Cadherins	Protocadherins	Clustered protocadherins
HGNC:8716	PCDHGC3	protocadherin gamma subfamily C, 3	PCDH2	PC-43, PC43, PCDH-GAMMA-C3	5q31.3	20	Clustered protocadherins	CAMs	Cell Adhesion Molecules	Cadherins	Protocadherins	Clustered protocadherins
HGNC:8717	PCDHGC4	protocadherin gamma subfamily C, 4		PCDH-GAMMA-C4	5q31.3	20	Clustered protocadherins	CAMs	Cell Adhesion Molecules	Cadherins	Protocadherins	Clustered protocadherins
HGNC:8718	PCDHGC5	protocadherin gamma subfamily C, 5		PCDH-GAMMA-C5	5q31.3	20	Clustered protocadherins	CAMs	Cell Adhesion Molecules	Cadherins	Protocadherins	Clustered protocadherins
HGNC:8719	PCDHGCT	protocadherin gamma constant		PCDHGC	5q31	20	Clustered protocadherins	CAMs	Cell Adhesion Molecules	Cadherins	Protocadherins	Clustered protocadherins
HGNC:8655	PCDH1	protocadherin 1		pc42	5q31.3	21	Non-clustered protocadherins	CAMs	Cell Adhesion Molecules	Cadherins	Protocadherins	Non-clustered protocadherins
HGNC:13404	PCDH10	protocadherin 10		OL-PCDH, KIAA1400	4q28.3	21	Non-clustered protocadherins	CAMs	Cell Adhesion Molecules	Cadherins	Protocadherins	Non-clustered protocadherins
HGNC:8656	PCDH11X	protocadherin 11 X-linked	PCDH11	PCDH-X, PCDHX, PPP1R119	Xq21.31	21	Non-clustered protocadherins	CAMs	Cell Adhesion Molecules	Cadherins	Protocadherins	Non-clustered protocadherins
HGNC:15813	PCDH11Y	protocadherin 11 Y-linked	PCDH22	PCDHY	Yp11.2	21	Non-clustered protocadherins	CAMs	Cell Adhesion Molecules	Cadherins	Protocadherins	Non-clustered protocadherins
HGNC:8657	PCDH12	protocadherin 12		VE-cadherin-2	5q31.3	21	Non-clustered protocadherins	CAMs	Cell Adhesion Molecules	Cadherins	Protocadherins	Non-clustered protocadherins
HGNC:14267	PCDH17	protocadherin 17		PCDH68, PCH68	13q21.1	21	Non-clustered protocadherins	CAMs	Cell Adhesion Molecules	Cadherins	Protocadherins	Non-clustered protocadherins
HGNC:14268	PCDH18	protocadherin 18		KIAA1562, PCDH68L	4q28.3	21	Non-clustered protocadherins	CAMs	Cell Adhesion Molecules	Cadherins	Protocadherins	Non-clustered protocadherins
HGNC:14270	PCDH19	protocadherin 19	EFMR	KIAA1313, EIEE9	Xq22.1	21	Non-clustered protocadherins	CAMs	Cell Adhesion Molecules	Cadherins	Protocadherins	Non-clustered protocadherins
HGNC:14257	PCDH20	protocadherin 20		PCDH13, FLJ22218	13q21.2	21	Non-clustered protocadherins	CAMs	Cell Adhesion Molecules	Cadherins	Protocadherins	Non-clustered protocadherins
HGNC:8659	PCDH7	protocadherin 7		BH-Pcdh, PPP1R120	4p15.1	21	Non-clustered protocadherins	CAMs	Cell Adhesion Molecules	Cadherins	Protocadherins	Non-clustered protocadherins
HGNC:8660	PCDH8	protocadherin 8		PAPC, ARCADLIN	13q14.3	21	Non-clustered protocadherins	CAMs	Cell Adhesion Molecules	Cadherins	Protocadherins	Non-clustered protocadherins
HGNC:8661	PCDH9	protocadherin 9			13q21.32	21	Non-clustered protocadherins	CAMs	Cell Adhesion Molecules	Cadherins	Protocadherins	Non-clustered protocadherins
HGNC:1814	CEACAM1	CEA cell adhesion molecule 1	BGP	BGP1, CD66a	19q13.2	906	CEA cell adhesion molecule family	CAMs	Cell Adhesion Molecules	CEA cell adhesion molecule family
HGNC:31948	CEACAM16	CEA cell adhesion molecule 16, tectorial membrane component		DFNA4B	19q13.31-q13.32	906	CEA cell adhesion molecule family	CAMs	Cell Adhesion Molecules	CEA cell adhesion molecule family
HGNC:31949	CEACAM18	CEA cell adhesion molecule 18			19q13.41	906	CEA cell adhesion molecule family	CAMs	Cell Adhesion Molecules	CEA cell adhesion molecule family
HGNC:31951	CEACAM19	CEA cell adhesion molecule 19		CEAL1	19q13.31	906	CEA cell adhesion molecule family	CAMs	Cell Adhesion Molecules	CEA cell adhesion molecule family
HGNC:24879	CEACAM20	CEA cell adhesion molecule 20		UNQ9366	19q13.31	906	CEA cell adhesion molecule family	CAMs	Cell Adhesion Molecules	CEA cell adhesion molecule family
HGNC:28834	CEACAM21	CEA cell adhesion molecule 21		R29124_1, FLJ13540	19q13.2	906	CEA cell adhesion molecule family	CAMs	Cell Adhesion Molecules	CEA cell adhesion molecule family
HGNC:38029	CEACAM22P	CEA cell adhesion molecule 22, pseudogene			19q13.31	906	CEA cell adhesion molecule family	CAMs	Cell Adhesion Molecules	CEA cell adhesion molecule family
HGNC:1815	CEACAM3	CEA cell adhesion molecule 3	CGM1	CD66d	19q13.2	906	CEA cell adhesion molecule family	CAMs	Cell Adhesion Molecules	CEA cell adhesion molecule family
HGNC:1816	CEACAM4	CEA cell adhesion molecule 4	CGM7		19q13.2	906	CEA cell adhesion molecule family	CAMs	Cell Adhesion Molecules	CEA cell adhesion molecule family
HGNC:1817	CEACAM5	CEA cell adhesion molecule 5	CEA	CD66e	19q13.2	906	CEA cell adhesion molecule family	CAMs	Cell Adhesion Molecules	CEA cell adhesion molecule family
HGNC:1818	CEACAM6	CEA cell adhesion molecule 6	NCA	CD66c	19q13.2	906	CEA cell adhesion molecule family	CAMs	Cell Adhesion Molecules	CEA cell adhesion molecule family
HGNC:1819	CEACAM7	CEA cell adhesion molecule 7	CGM2	CEA	19q13.2	906	CEA cell adhesion molecule family	CAMs	Cell Adhesion Molecules	CEA cell adhesion molecule family
HGNC:1820	CEACAM8	CEA cell adhesion molecule 8	CGM6	CD66b	19q13.2	906	CEA cell adhesion molecule family	CAMs	Cell Adhesion Molecules	CEA cell adhesion molecule family
HGNC:1821	CEACAMP1	CEA cell adhesion molecule pseudogene 1	CGM8		19q13.2	906	CEA cell adhesion molecule family	CAMs	Cell Adhesion Molecules	CEA cell adhesion molecule family
HGNC:1822	CEACAMP10	CEA cell adhesion molecule pseudogene 10	CGM17		19q13.31	906	CEA cell adhesion molecule family	CAMs	Cell Adhesion Molecules	CEA cell adhesion molecule family
HGNC:1823	CEACAMP11	CEA cell adhesion molecule pseudogene 11	CGM18		19q13.31	906	CEA cell adhesion molecule family	CAMs	Cell Adhesion Molecules	CEA cell adhesion molecule family
HGNC:1824	CEACAMP2	CEA cell adhesion molecule pseudogene 2	CGM9		19q13.2	906	CEA cell adhesion molecule family	CAMs	Cell Adhesion Molecules	CEA cell adhesion molecule family
HGNC:1825	CEACAMP3	CEA cell adhesion molecule pseudogene 3	CGM10, CEACAM24P		19q13.2	906	CEA cell adhesion molecule family	CAMs	Cell Adhesion Molecules	CEA cell adhesion molecule family
HGNC:1826	CEACAMP4	CEA cell adhesion molecule pseudogene 4	CGM11		19q13.31	906	CEA cell adhesion molecule family	CAMs	Cell Adhesion Molecules	CEA cell adhesion molecule family
HGNC:1827	CEACAMP5	CEA cell adhesion molecule pseudogene 5	CGM12		19q13.2	906	CEA cell adhesion molecule family	CAMs	Cell Adhesion Molecules	CEA cell adhesion molecule family
HGNC:1828	CEACAMP6	CEA cell adhesion molecule pseudogene 6	CGM13		19q13.2	906	CEA cell adhesion molecule family	CAMs	Cell Adhesion Molecules	CEA cell adhesion molecule family
HGNC:1829	CEACAMP7	CEA cell adhesion molecule pseudogene 7	CGM14		19q13.31	906	CEA cell adhesion molecule family	CAMs	Cell Adhesion Molecules	CEA cell adhesion molecule family
HGNC:1830	CEACAMP8	CEA cell adhesion molecule pseudogene 8	CGM15		19q13.31	906	CEA cell adhesion molecule family	CAMs	Cell Adhesion Molecules	CEA cell adhesion molecule family
HGNC:1831	CEACAMP9	CEA cell adhesion molecule pseudogene 9	CGM16		19q13.31	906	CEA cell adhesion molecule family	CAMs	Cell Adhesion Molecules	CEA cell adhesion molecule family
HGNC:2171	CNTN1	contactin 1		F3, GP135	12q12	1909	Contactins	CAMs	Cell Adhesion Molecules	Ig-like cell adhesion molecule family	Contactins
HGNC:2172	CNTN2	contactin 2	TAX, AXT	TAG-1, TAX1	1q32.1	1909	Contactins	CAMs	Cell Adhesion Molecules	Ig-like cell adhesion molecule family	Contactins
HGNC:2173	CNTN3	contactin 3	PANG	BIG-1	3p12.3	1909	Contactins	CAMs	Cell Adhesion Molecules	Ig-like cell adhesion molecule family	Contactins
HGNC:2174	CNTN4	contactin 4		BIG-2	3p26.3-p26.2	1909	Contactins	CAMs	Cell Adhesion Molecules	Ig-like cell adhesion molecule family	Contactins
HGNC:2175	CNTN5	contactin 5		NB-2, hNB-2	11q22.1	1909	Contactins	CAMs	Cell Adhesion Molecules	Ig-like cell adhesion molecule family	Contactins
HGNC:2176	CNTN6	contactin 6		NB-3	3p26.3	1909	Contactins	CAMs	Cell Adhesion Molecules	Ig-like cell adhesion molecule family	Contactins
HGNC:24039	CLMP	CXADR like membrane protein		ASAM, FLJ22415, ACAM	11q24.1	1414	IgCAM CXADR-related subfamily	CAMs	Cell Adhesion Molecules	Ig-like cell adhesion molecule family	IgCAM CXADR-related subfamily
HGNC:2559	CXADR	CXADR Ig-like cell adhesion molecule		CAR	21q21.1	1414	IgCAM CXADR-related subfamily	CAMs	Cell Adhesion Molecules	Ig-like cell adhesion molecule family	IgCAM CXADR-related subfamily
HGNC:17474	ESAM	endothelial cell adhesion molecule		W117m	11q24.2	1414	IgCAM CXADR-related subfamily	CAMs	Cell Adhesion Molecules	Ig-like cell adhesion molecule family	IgCAM CXADR-related subfamily
HGNC:4445	GPA33	glycoprotein A33		A33	1q24.1	1414	IgCAM CXADR-related subfamily	CAMs	Cell Adhesion Molecules	Ig-like cell adhesion molecule family	IgCAM CXADR-related subfamily
HGNC:16669	IGSF11	immunoglobulin superfamily member 11		BT-IgSF, MGC35227, Igsf13, VSIG3, CT119	3q13.32	1414	IgCAM CXADR-related subfamily	CAMs	Cell Adhesion Molecules	Ig-like cell adhesion molecule family	IgCAM CXADR-related subfamily
HGNC:28675	VSIG1	V-set and immunoglobulin domain containing 1		MGC44287, GPA34	Xq22.3	1414	IgCAM CXADR-related subfamily	CAMs	Cell Adhesion Molecules	Ig-like cell adhesion molecule family	IgCAM CXADR-related subfamily
HGNC:17149	VSIG2	V-set and immunoglobulin domain containing 2		CTXL, CTH	11q24.2	1414	IgCAM CXADR-related subfamily	CAMs	Cell Adhesion Molecules	Ig-like cell adhesion molecule family	IgCAM CXADR-related subfamily
HGNC:32063	VSIG8	V-set and immunoglobulin domain containing 8			1q23.2	1414	IgCAM CXADR-related subfamily	CAMs	Cell Adhesion Molecules	Ig-like cell adhesion molecule family	IgCAM CXADR-related subfamily
HGNC:34550	IGLON5	IgLON family member 5		LOC402665	19q13.41	1052	IgLON cell adhesion molecules	CAMs	Cell Adhesion Molecules	Ig-like cell adhesion molecule family	IgLON cell adhesion molecules
HGNC:6705	LSAMP	limbic system associated membrane protein		LAMP, IGLON3	3q13.31	1052	IgLON cell adhesion molecules	CAMs	Cell Adhesion Molecules	Ig-like cell adhesion molecule family	IgLON cell adhesion molecules
HGNC:17302	NEGR1	neuronal growth regulator 1		KILON, MGC46680, Ntra, IGLON4	1p31.1	1052	IgLON cell adhesion molecules	CAMs	Cell Adhesion Molecules	Ig-like cell adhesion molecule family	IgLON cell adhesion molecules
HGNC:17941	NTM	neurotrimin		HNT, NTRI, IGLON2, CEPU-1	11q25	1052	IgLON cell adhesion molecules	CAMs	Cell Adhesion Molecules	Ig-like cell adhesion molecule family	IgLON cell adhesion molecules
HGNC:8143	OPCML	opioid binding protein/cell adhesion molecule like		OPCM, OBCAM, IGLON1	11q25	1052	IgLON cell adhesion molecules	CAMs	Cell Adhesion Molecules	Ig-like cell adhesion molecule family	IgLON cell adhesion molecules
HGNC:5951	CADM1	cell adhesion molecule 1	TSLC1, IGSF4	NECL2, ST17, BL2, SYNCAM, IGSF4A, Necl-2, SYNCAM1, RA175	11q23.3	1855	Nectins and nectin-like molecules	CAMs	Cell Adhesion Molecules	Ig-like cell adhesion molecule family	Nectins and nectin-like molecules
HGNC:29849	CADM2	cell adhesion molecule 2	IGSF4D	NECL3, Necl-3, SynCAM2	3p12.1	1855	Nectins and nectin-like molecules	CAMs	Cell Adhesion Molecules	Ig-like cell adhesion molecule family	Nectins and nectin-like molecules
HGNC:17601	CADM3	cell adhesion molecule 3	IGSF4B	BIgR, FLJ10698, TSLL1, NECL1, SynCAM3, Necl-1	1q23.2	1855	Nectins and nectin-like molecules	CAMs	Cell Adhesion Molecules	Ig-like cell adhesion molecule family	Nectins and nectin-like molecules
HGNC:30825	CADM4	cell adhesion molecule 4	IGSF4C	TSLL2, Necl-4, SynCAM4	19q13.31	1855	Nectins and nectin-like molecules	CAMs	Cell Adhesion Molecules	Ig-like cell adhesion molecule family	Nectins and nectin-like molecules
HGNC:24313	CRTAM	cytotoxic and regulatory T cell molecule		CD355	11q24.1	1855	Nectins and nectin-like molecules	CAMs	Cell Adhesion Molecules	Ig-like cell adhesion molecule family	Nectins and nectin-like molecules
HGNC:9706	NECTIN1	nectin cell adhesion molecule 1	HVEC, ED4, PVRL1	PRR, PRR1, PVRR1, SK-12, HIgR, CLPED1, CD111, OFC7	11q23.3	1855	Nectins and nectin-like molecules	Adherens Junction	Cell Adhesion Molecules	Ig-like cell adhesion molecule family	Nectins and nectin-like molecules
HGNC:9707	NECTIN2	nectin cell adhesion molecule 2	HVEB, PVRL2	PVRR2, PRR2, CD112	19q13.32	1855	Nectins and nectin-like molecules	Adherens Junction	Cell Adhesion Molecules	Ig-like cell adhesion molecule family	Nectins and nectin-like molecules
HGNC:17664	NECTIN3	nectin cell adhesion molecule 3	PVRL3	nectin-3, PPR3, PVRR3, DKFZP566B0846, CDw113, CD113	3q13.13	1855	Nectins and nectin-like molecules	Adherens Junction	Cell Adhesion Molecules	Ig-like cell adhesion molecule family	Nectins and nectin-like molecules
HGNC:19688	NECTIN4	nectin cell adhesion molecule 4	PVRL4	nectin-4, PRR4, LNIR	1q23.3	1855	Nectins and nectin-like molecules	Adherens Junction	Cell Adhesion Molecules	Ig-like cell adhesion molecule family	Nectins and nectin-like molecules
HGNC:9705	PVR	PVR cell adhesion molecule	PVS	CD155, HVED, Necl-5, NECL5, Tage4	19q13.31	1855	Nectins and nectin-like molecules	CAMs	Cell Adhesion Molecules	Ig-like cell adhesion molecule family	Nectins and nectin-like molecules
HGNC:1643	CD22	CD22 molecule		SIGLEC-2, SIGLEC2	19q13.12	745	Sialic acid binding Ig like lectins	CAMs	Cell Adhesion Molecules	Ig-like cell adhesion molecule family	Sialic acid binding Ig like lectins
HGNC:1659	CD33	CD33 molecule		SIGLEC3, SIGLEC-3, p67, FLJ00391	19q13.41	745	Sialic acid binding Ig like lectins	CAMs	Cell Adhesion Molecules	Ig-like cell adhesion molecule family	Sialic acid binding Ig like lectins
HGNC:6783	MAG	myelin associated glycoprotein	GMA	SIGLEC4A, SIGLEC-4A, S-MAG	19q13.1	745	Sialic acid binding Ig like lectins	CAMs	Cell Adhesion Molecules	Ig-like cell adhesion molecule family	Sialic acid binding Ig like lectins
HGNC:11127	SIGLEC1	sialic acid binding Ig like lectin 1	SN	SIGLEC-1, CD169, FLJ00051, FLJ00055, FLJ00073, FLJ32150, dJ1009E24.1, sialoadhesin	20p13	745	Sialic acid binding Ig like lectins	CAMs	Cell Adhesion Molecules	Ig-like cell adhesion molecule family	Sialic acid binding Ig like lectins
HGNC:15620	SIGLEC10	sialic acid binding Ig like lectin 10		SIGLEC-10, SLG2, PRO940, MGC126774	19q13.41	745	Sialic acid binding Ig like lectins	CAMs	Cell Adhesion Molecules	Ig-like cell adhesion molecule family	Sialic acid binding Ig like lectins
HGNC:15622	SIGLEC11	sialic acid binding Ig like lectin 11			19q13.33	745	Sialic acid binding Ig like lectins	CAMs	Cell Adhesion Molecules	Ig-like cell adhesion molecule family	Sialic acid binding Ig like lectins
HGNC:15482	SIGLEC12	sialic acid binding Ig like lectin 12 (gene/pseudogene)	SIGLECL1	SLG, S2V, Siglec-XII, Siglec-12, Siglec-L1	19q13.41	745	Sialic acid binding Ig like lectins	CAMs	Cell Adhesion Molecules	Ig-like cell adhesion molecule family	Sialic acid binding Ig like lectins
HGNC:32926	SIGLEC14	sialic acid binding Ig like lectin 14			19q13.41	745	Sialic acid binding Ig like lectins	CAMs	Cell Adhesion Molecules	Ig-like cell adhesion molecule family	Sialic acid binding Ig like lectins
HGNC:27596	SIGLEC15	sialic acid binding Ig like lectin 15	CD33L3	HsT1361	18q21.1	745	Sialic acid binding Ig like lectins	CAMs	Cell Adhesion Molecules	Ig-like cell adhesion molecule family	Sialic acid binding Ig like lectins
HGNC:24851	SIGLEC16	sialic acid binding Ig like lectin 16 (gene/pseudogene)	SIGLECP16	Siglec-P16	19q13.33	745	Sialic acid binding Ig like lectins	CAMs	Cell Adhesion Molecules	Ig-like cell adhesion molecule family	Sialic acid binding Ig like lectins
HGNC:15604	SIGLEC17P	sialic acid binding Ig like lectin 17, pseudogene	SIGLECP3		19q13.41	745	Sialic acid binding Ig like lectins	CAMs	Cell Adhesion Molecules	Ig-like cell adhesion molecule family	Sialic acid binding Ig like lectins
HGNC:15491	SIGLEC18P	sialic acid binding Ig like lectin 18, pseudogene	SIGLECP1		19q13.41	745	Sialic acid binding Ig like lectins	CAMs	Cell Adhesion Molecules	Ig-like cell adhesion molecule family	Sialic acid binding Ig like lectins
HGNC:15609	SIGLEC20P	sialic acid binding Ig like lectin 20, pseudogene	SIGLECP4		19q13.41	745	Sialic acid binding Ig like lectins	CAMs	Cell Adhesion Molecules	Ig-like cell adhesion molecule family	Sialic acid binding Ig like lectins
HGNC:15610	SIGLEC21P	sialic acid binding Ig like lectin 21, pseudogene	SIGLECP5		19q13.41	745	Sialic acid binding Ig like lectins	CAMs	Cell Adhesion Molecules	Ig-like cell adhesion molecule family	Sialic acid binding Ig like lectins
HGNC:15611	SIGLEC22P	sialic acid binding Ig like lectin 22, pseudogene	SIGLECP6		19q13.41	745	Sialic acid binding Ig like lectins	CAMs	Cell Adhesion Molecules	Ig-like cell adhesion molecule family	Sialic acid binding Ig like lectins
HGNC:15613	SIGLEC24P	sialic acid binding Ig like lectin 24, pseudogene	SIGLECP8		19q13.41	745	Sialic acid binding Ig like lectins	CAMs	Cell Adhesion Molecules	Ig-like cell adhesion molecule family	Sialic acid binding Ig like lectins
HGNC:15614	SIGLEC25P	sialic acid binding Ig like lectin 25, pseudogene	SIGLECP9		19q13.41	745	Sialic acid binding Ig like lectins	CAMs	Cell Adhesion Molecules	Ig-like cell adhesion molecule family	Sialic acid binding Ig like lectins
HGNC:15615	SIGLEC26P	sialic acid binding Ig like lectin 26, pseudogene	SIGLECP10		19q13.41	745	Sialic acid binding Ig like lectins	CAMs	Cell Adhesion Molecules	Ig-like cell adhesion molecule family	Sialic acid binding Ig like lectins
HGNC:15617	SIGLEC27P	sialic acid binding Ig like lectin 27, pseudogene	SIGLECP11		19q13.41	745	Sialic acid binding Ig like lectins	CAMs	Cell Adhesion Molecules	Ig-like cell adhesion molecule family	Sialic acid binding Ig like lectins
HGNC:15618	SIGLEC28P	sialic acid binding Ig like lectin 28, pseudogene	SIGLECP12		19q13.41	745	Sialic acid binding Ig like lectins	CAMs	Cell Adhesion Molecules	Ig-like cell adhesion molecule family	Sialic acid binding Ig like lectins
HGNC:15619	SIGLEC29P	sialic acid binding Ig like lectin 29, pseudogene	SIGLECP13		19q13.41	745	Sialic acid binding Ig like lectins	CAMs	Cell Adhesion Molecules	Ig-like cell adhesion molecule family	Sialic acid binding Ig like lectins
HGNC:15623	SIGLEC30P	sialic acid binding Ig like lectin 30, pseudogene	SIGLECP14		1q24.2	745	Sialic acid binding Ig like lectins	CAMs	Cell Adhesion Molecules	Ig-like cell adhesion molecule family	Sialic acid binding Ig like lectins
HGNC:16072	SIGLEC31P	sialic acid binding Ig like lectin 31, pseudogene	SIGLECP15		19q13.43	745	Sialic acid binding Ig like lectins	CAMs	Cell Adhesion Molecules	Ig-like cell adhesion molecule family	Sialic acid binding Ig like lectins
HGNC:10874	SIGLEC5	sialic acid binding Ig like lectin 5	CD33L2	OB-BP2, SIGLEC-5, CD170	19q13.41	745	Sialic acid binding Ig like lectins	CAMs	Cell Adhesion Molecules	Ig-like cell adhesion molecule family	Sialic acid binding Ig like lectins
HGNC:10875	SIGLEC6	sialic acid binding Ig like lectin 6	CD33L, CD33L1	OB-BP1, SIGLEC-6, CD327	19q13.41	745	Sialic acid binding Ig like lectins	CAMs	Cell Adhesion Molecules	Ig-like cell adhesion molecule family	Sialic acid binding Ig like lectins
HGNC:10876	SIGLEC7	sialic acid binding Ig like lectin 7	SIGLEC19P, SIGLECP2	SIGLEC-7, p75/AIRM1, QA79, CD328	19q13.41	745	Sialic acid binding Ig like lectins	CAMs	Cell Adhesion Molecules	Ig-like cell adhesion molecule family	Sialic acid binding Ig like lectins
HGNC:10877	SIGLEC8	sialic acid binding Ig like lectin 8		SIGLEC-8, SAF2, SIGLEC8L, MGC59785	19q13.33-q13.41	745	Sialic acid binding Ig like lectins	CAMs	Cell Adhesion Molecules	Ig-like cell adhesion molecule family	Sialic acid binding Ig like lectins
HGNC:10878	SIGLEC9	sialic acid binding Ig like lectin 9		CD329	19q13.3-q13.4	745	Sialic acid binding Ig like lectins	CAMs	Cell Adhesion Molecules	Ig-like cell adhesion molecule family	Sialic acid binding Ig like lectins
HGNC:400	ALCAM	activated leukocyte cell adhesion molecule		CD166, MEMD	3q13.11	1410	Ig-like cell adhesion molecule family	CAMs	Cell Adhesion Molecules	Ig-like cell adhesion molecule family
HGNC:6722	BCAM	basal cell adhesion molecule (Lutheran blood group)	LU	CD239	19q13.32	1410	Ig-like cell adhesion molecule family	CAMs	Cell Adhesion Molecules	Ig-like cell adhesion molecule family
HGNC:17173	BOC	BOC cell adhesion associated, oncogene regulated		CDON2	3q13.2	1410	Ig-like cell adhesion molecule family	CAMs	Cell Adhesion Molecules	Ig-like cell adhesion molecule family
HGNC:1639	CD2	CD2 molecule	SRBC		1p13.1	1410	Ig-like cell adhesion molecule family	CAMs	Cell Adhesion Molecules	Ig-like cell adhesion molecule family
HGNC:18171	CD244	CD244 molecule		2B4, NAIL, NKR2B4, Nmrk, SLAMF4	1q23.3	1410	Ig-like cell adhesion molecule family	CAMs	Cell Adhesion Molecules	Ig-like cell adhesion molecule family
HGNC:1653	CD28	CD28 molecule			2q33.2	1410	Ig-like cell adhesion molecule family	CAMs	Cell Adhesion Molecules	Ig-like cell adhesion molecule family
HGNC:1682	CD47	CD47 molecule	MER6	IAP, OA3	3q13.12	1410	Ig-like cell adhesion molecule family	CAMs	Cell Adhesion Molecules	Ig-like cell adhesion molecule family
HGNC:1688	CD58	CD58 molecule	LFA3		1p13.1	1410	Ig-like cell adhesion molecule family	CAMs	Cell Adhesion Molecules	Ig-like cell adhesion molecule family
HGNC:1704	CD84	CD84 molecule		SLAMF5, hCD84, mCD84	1q23.3	1410	Ig-like cell adhesion molecule family	CAMs	Cell Adhesion Molecules	Ig-like cell adhesion molecule family
HGNC:16892	CD96	CD96 molecule		TACTILE	3q13.13-q13.2	1410	Ig-like cell adhesion molecule family	CAMs	Cell Adhesion Molecules	Ig-like cell adhesion molecule family
HGNC:1939	CHL1	cell adhesion molecule L1 like		CALL, L1CAM2, FLJ44930, MGC132578	3p26.3	1410	Ig-like cell adhesion molecule family	CAMs	Cell Adhesion Molecules	Ig-like cell adhesion molecule family
HGNC:3039	DSCAM	DS cell adhesion molecule		CHD2-42, CHD2-52	21q22.2	1410	Ig-like cell adhesion molecule family	CAMs	Cell Adhesion Molecules	Ig-like cell adhesion molecule family
HGNC:14656	DSCAML1	DS cell adhesion molecule like 1		KIAA1132	11q23.3	1410	Ig-like cell adhesion molecule family	CAMs	Cell Adhesion Molecules	Ig-like cell adhesion molecule family
HGNC:14685	F11R	F11 receptor	JAM1	PAM-1, JCAM, JAM-1, JAM-A, JAMA, CD321	1q23.3	1410	Ig-like cell adhesion molecule family	Tight Junctions	Cell Adhesion Molecules	Ig-like cell adhesion molecule family
HGNC:3693	FGFRL1	fibroblast growth factor receptor like 1			4p16.3	1410	Ig-like cell adhesion molecule family	CAMs	Cell Adhesion Molecules	Ig-like cell adhesion molecule family
HGNC:14388	GP6	glycoprotein VI platelet		GPVI	19q13.42	1410	Ig-like cell adhesion molecule family	CAMs	Cell Adhesion Molecules	Ig-like cell adhesion molecule family
HGNC:26361	HEPACAM	hepatic and glial cell adhesion molecule		FLJ25530, hepaCAM, GLIALCAM	11q24.2	1410	Ig-like cell adhesion molecule family	CAMs	Cell Adhesion Molecules	Ig-like cell adhesion molecule family
HGNC:5344	ICAM1	intercellular adhesion molecule 1		BB2, CD54	19p13.2	1410	Ig-like cell adhesion molecule family	CAMs	Cell Adhesion Molecules	Ig-like cell adhesion molecule family
HGNC:5345	ICAM2	intercellular adhesion molecule 2		CD102	17q23.3	1410	Ig-like cell adhesion molecule family	CAMs	Cell Adhesion Molecules	Ig-like cell adhesion molecule family
HGNC:5346	ICAM3	intercellular adhesion molecule 3		CDW50, ICAM-R, CD50	19p13.2	1410	Ig-like cell adhesion molecule family	CAMs	Cell Adhesion Molecules	Ig-like cell adhesion molecule family
HGNC:5347	ICAM4	intercellular adhesion molecule 4 (Landsteiner-Wiener blood group)	LW	CD242	19p13.2	1410	Ig-like cell adhesion molecule family	CAMs	Cell Adhesion Molecules	Ig-like cell adhesion molecule family
HGNC:5348	ICAM5	intercellular adhesion molecule 5	TLCN	TLN	19p13.2	1410	Ig-like cell adhesion molecule family	CAMs	Cell Adhesion Molecules	Ig-like cell adhesion molecule family
HGNC:5952	IGSF5	immunoglobulin superfamily member 5		JAM4	21q22.2	1410	Ig-like cell adhesion molecule family	CAMs	Cell Adhesion Molecules	Ig-like cell adhesion molecule family
HGNC:28539	IZUMO1	izumo sperm-egg fusion 1		IZUMO, MGC34799, OBF	19q13.33	1410	Ig-like cell adhesion molecule family	CAMs	Cell Adhesion Molecules	Ig-like cell adhesion molecule family
HGNC:32565	IZUMO1R	IZUMO1 receptor, JUNO	FOLR4	Folbp3, JUNO	11q21	1410	Ig-like cell adhesion molecule family	CAMs	Cell Adhesion Molecules	Ig-like cell adhesion molecule family
HGNC:14686	JAM2	junctional adhesion molecule 2	C21orf43	VE-JAM, JAM-B, JAMB, CD322	21q21.3	1410	Ig-like cell adhesion molecule family	Tight Junctions	Cell Adhesion Molecules	Ig-like cell adhesion molecule family
HGNC:15532	JAM3	junctional adhesion molecule 3		JAM-C, JAMC	11q25	1410	Ig-like cell adhesion molecule family	Tight Junctions	Cell Adhesion Molecules	Ig-like cell adhesion molecule family
HGNC:19084	JAML	junction adhesion molecule like	AMICA1	Gm638, AMICA	11q23.3	1410	Ig-like cell adhesion molecule family	CAMs	Cell Adhesion Molecules	Ig-like cell adhesion molecule family
HGNC:6470	L1CAM	L1 cell adhesion molecule	HSAS1, SPG1, HSAS, MASA, MIC5, S10	CD171	Xq28	1410	Ig-like cell adhesion molecule family	CAMs	Cell Adhesion Molecules	Ig-like cell adhesion molecule family
HGNC:6606	LILRB2	leukocyte immunoglobulin like receptor B2		LIR-2, ILT4, MIR-10, LIR2, CD85d, MIR10	19q13.4	1410	Ig-like cell adhesion molecule family	CAMs	Cell Adhesion Molecules	Ig-like cell adhesion molecule family
HGNC:29290	LRFN1	leucine rich repeat and fibronectin type III domain containing 1		KIAA1484, SALM2	19q13.2	1410	Ig-like cell adhesion molecule family	CAMs	Cell Adhesion Molecules	Ig-like cell adhesion molecule family
HGNC:21226	LRFN2	leucine rich repeat and fibronectin type III domain containing 2	KIAA1246, SALM1	FIGLER2	6p21.2-p21.1	1410	Ig-like cell adhesion molecule family	CAMs	Cell Adhesion Molecules	Ig-like cell adhesion molecule family
HGNC:28370	LRFN3	leucine rich repeat and fibronectin type III domain containing 3		MGC2656, SALM4, FIGLER1	19q13.13	1410	Ig-like cell adhesion molecule family	CAMs	Cell Adhesion Molecules	Ig-like cell adhesion molecule family
HGNC:28456	LRFN4	leucine rich repeat and fibronectin type III domain containing 4		MGC3103, SALM3., FIGLER6	11q13.1	1410	Ig-like cell adhesion molecule family	CAMs	Cell Adhesion Molecules	Ig-like cell adhesion molecule family
HGNC:20360	LRFN5	leucine rich repeat and fibronectin type III domain containing 5	C14orf146	FIGLER8, SALM5	14q21.1	1410	Ig-like cell adhesion molecule family	CAMs	Cell Adhesion Molecules	Ig-like cell adhesion molecule family
HGNC:15586	LRRC4	leucine rich repeat containing 4		NAG14	7q32.1	1410	Ig-like cell adhesion molecule family	CAMs	Cell Adhesion Molecules	Ig-like cell adhesion molecule family
HGNC:25042	LRRC4B	leucine rich repeat containing 4B	LRIG4	DKFZp761A179, HSM	19q13.33	1410	Ig-like cell adhesion molecule family	CAMs	Cell Adhesion Molecules	Ig-like cell adhesion molecule family
HGNC:29317	LRRC4C	leucine rich repeat containing 4C		KIAA1580, NGL-1	11p12	1410	Ig-like cell adhesion molecule family	CAMs	Cell Adhesion Molecules	Ig-like cell adhesion molecule family
HGNC:6765	MADCAM1	mucosal vascular addressin cell adhesion molecule 1		MACAM1	19p13.3	1410	Ig-like cell adhesion molecule family	CAMs	Cell Adhesion Molecules	Ig-like cell adhesion molecule family
HGNC:6934	MCAM	melanoma cell adhesion molecule		MUC18, CD146, MelCAM, METCAM, HEMCAM	11q23.3	1410	Ig-like cell adhesion molecule family	CAMs	Cell Adhesion Molecules	Ig-like cell adhesion molecule family
HGNC:7225	MPZ	myelin protein zero	CMT1, CMT1B	HMSNIB, CMT2I, CMT2J, P0	1q23.3	1410	Ig-like cell adhesion molecule family	CAMs	Cell Adhesion Molecules	Ig-like cell adhesion molecule family
HGNC:3496	MPZL2	myelin protein zero like 2	EVA1	EVA	11q24	1410	Ig-like cell adhesion molecule family	CAMs	Cell Adhesion Molecules	Ig-like cell adhesion molecule family
HGNC:7656	NCAM1	neural cell adhesion molecule 1		NCAM, CD56	11q23.2	1410	Ig-like cell adhesion molecule family	CAMs	Cell Adhesion Molecules	Ig-like cell adhesion molecule family
HGNC:7657	NCAM2	neural cell adhesion molecule 2		NCAM21, MGC51008	21q21.1	1410	Ig-like cell adhesion molecule family	CAMs	Cell Adhesion Molecules	Ig-like cell adhesion molecule family
HGNC:7754	NEO1	neogenin 1		NGN, HsT17534, IGDCC2, NTN1R2	15q24.1	1410	Ig-like cell adhesion molecule family	CAMs	Cell Adhesion Molecules	Ig-like cell adhesion molecule family
HGNC:29866	NFASC	neurofascin		NRCAML, KIAA0756, FLJ46866, NF	1q32.1	1410	Ig-like cell adhesion molecule family	CAMs	Cell Adhesion Molecules	Ig-like cell adhesion molecule family
HGNC:7994	NRCAM	neuronal cell adhesion molecule		KIAA0343, Bravo	7q31.1	1410	Ig-like cell adhesion molecule family	CAMs	Cell Adhesion Molecules	Ig-like cell adhesion molecule family
HGNC:8823	PECAM1	platelet and endothelial cell adhesion molecule 1		CD31	17q23.3	1410	Ig-like cell adhesion molecule family	CAMs	Cell Adhesion Molecules	Ig-like cell adhesion molecule family
HGNC:9675	PTPRM	protein tyrosine phosphatase receptor type M	PTPRL1	RPTPU, hR-PTPu	18p11.23	1410	Ig-like cell adhesion molecule family	CAMs	Cell Adhesion Molecules	Ig-like cell adhesion molecule family
HGNC:10249	ROBO1	roundabout guidance receptor 1		DUTT1, FLJ21882, SAX3	3p12.3	1410	Ig-like cell adhesion molecule family	CAMs	Cell Adhesion Molecules	Ig-like cell adhesion molecule family
HGNC:10250	ROBO2	roundabout guidance receptor 2		KIAA1568	3p12.3	1410	Ig-like cell adhesion molecule family	CAMs	Cell Adhesion Molecules	Ig-like cell adhesion molecule family
HGNC:19307	SDK1	sidekick cell adhesion molecule 1		FLJ31425	7p22.2	1410	Ig-like cell adhesion molecule family	CAMs	Cell Adhesion Molecules	Ig-like cell adhesion molecule family
HGNC:26856	SIGLECL1	SIGLEC family like 1	C19orf75, SIGLEC23P, SIGLECP7	FLJ40235	19q13.41	1410	Ig-like cell adhesion molecule family	CAMs	Cell Adhesion Molecules	Ig-like cell adhesion molecule family
HGNC:9662	SIRPA	signal regulatory protein alpha	PTPNS1	SHPS1, SIRP, MYD-1, BIT, P84, SHPS-1, SIRPalpha, CD172a, SIRPalpha2, MFR, SIRP-ALPHA-1	20p13	1410	Ig-like cell adhesion molecule family	CAMs	Cell Adhesion Molecules	Ig-like cell adhesion molecule family
HGNC:15757	SIRPG	signal regulatory protein gamma	SIRPB2	bA77C3.1, SIRP-B2, SIRPgamma, CD172g	20p13	1410	Ig-like cell adhesion molecule family	CAMs	Cell Adhesion Molecules	Ig-like cell adhesion molecule family
HGNC:10903	SLAMF1	signaling lymphocytic activation molecule family member 1	SLAM	CD150	1q23.3	1410	Ig-like cell adhesion molecule family	CAMs	Cell Adhesion Molecules	Ig-like cell adhesion molecule family
HGNC:21392	SLAMF6	SLAM family member 6		KALI, NTBA, KALIb, Ly108, SF2000, NTB-A, CD352	1q23.2-q23.3	1410	Ig-like cell adhesion molecule family	CAMs	Cell Adhesion Molecules	Ig-like cell adhesion molecule family
HGNC:11801	THY1	Thy-1 cell surface antigen		CD90	11q23.3	1410	Ig-like cell adhesion molecule family	CAMs	Cell Adhesion Molecules	Ig-like cell adhesion molecule family
HGNC:12567	UNC5A	unc-5 netrin receptor A		KIAA1976, UNC5H1	5q35.2	1410	Ig-like cell adhesion molecule family	CAMs	Cell Adhesion Molecules	Ig-like cell adhesion molecule family
HGNC:12568	UNC5B	unc-5 netrin receptor B		UNC5H2, p53RDL1	10q22.1	1410	Ig-like cell adhesion molecule family	CAMs	Cell Adhesion Molecules	Ig-like cell adhesion molecule family
HGNC:18634	UNC5D	unc-5 netrin receptor D		KIAA1777, Unc5h4	8p12	1410	Ig-like cell adhesion molecule family	CAMs	Cell Adhesion Molecules	Ig-like cell adhesion molecule family
HGNC:12663	VCAM1	vascular cell adhesion molecule 1		CD106	1p21.2	1410	Ig-like cell adhesion molecule family	CAMs	Cell Adhesion Molecules	Ig-like cell adhesion molecule family
HGNC:6134	ITGA1	integrin subunit alpha 1		VLA1, CD49a	5q11.2	1160	Integrin alpha subunits	CAMs	Cell Adhesion Molecules	Integrins	Integrin alpha subunits
HGNC:6135	ITGA10	integrin subunit alpha 10			1q21.1	1160	Integrin alpha subunits	CAMs	Cell Adhesion Molecules	Integrins	Integrin alpha subunits
HGNC:6136	ITGA11	integrin subunit alpha 11		HsT18964	15q23	1160	Integrin alpha subunits	CAMs	Cell Adhesion Molecules	Integrins	Integrin alpha subunits
HGNC:6137	ITGA2	integrin subunit alpha 2	CD49B	CD49b	5q11.2	1160	Integrin alpha subunits	CAMs	Cell Adhesion Molecules	Integrins	Integrin alpha subunits
HGNC:6138	ITGA2B	integrin subunit alpha 2b	GP2B	CD41B, CD41, PPP1R93	17q21.31	1160	Integrin alpha subunits	CAMs	Cell Adhesion Molecules	Integrins	Integrin alpha subunits
HGNC:6139	ITGA3	integrin subunit alpha 3	MSK18	CD49c, VLA3a, VCA-2, GAP-B3	17q21.33	1160	Integrin alpha subunits	CAMs	Cell Adhesion Molecules	Integrins	Integrin alpha subunits
HGNC:6140	ITGA4	integrin subunit alpha 4	CD49D	CD49d	2q31.3	1160	Integrin alpha subunits	CAMs	Cell Adhesion Molecules	Integrins	Integrin alpha subunits
HGNC:6141	ITGA5	integrin subunit alpha 5	FNRA	CD49e	12q13.13	1160	Integrin alpha subunits	CAMs	Cell Adhesion Molecules	Integrins	Integrin alpha subunits
HGNC:6142	ITGA6	integrin subunit alpha 6		CD49f	2q31.1	1160	Integrin alpha subunits	CAMs	Cell Adhesion Molecules	Integrins	Integrin alpha subunits
HGNC:6143	ITGA7	integrin subunit alpha 7			12q13.2	1160	Integrin alpha subunits	CAMs	Cell Adhesion Molecules	Integrins	Integrin alpha subunits
HGNC:6144	ITGA8	integrin subunit alpha 8			10p13	1160	Integrin alpha subunits	CAMs	Cell Adhesion Molecules	Integrins	Integrin alpha subunits
HGNC:6145	ITGA9	integrin subunit alpha 9		RLC, ITGA4L, ALPHA-RLC	3p22.2	1160	Integrin alpha subunits	CAMs	Cell Adhesion Molecules	Integrins	Integrin alpha subunits
HGNC:6146	ITGAD	integrin subunit alpha D		CD11d, ADB2	16p11.2	1160	Integrin alpha subunits	CAMs	Cell Adhesion Molecules	Integrins	Integrin alpha subunits
HGNC:6147	ITGAE	integrin subunit alpha E		CD103, HUMINAE	17p13.2	1160	Integrin alpha subunits	CAMs	Cell Adhesion Molecules	Integrins	Integrin alpha subunits
HGNC:6148	ITGAL	integrin subunit alpha L	CD11A	LFA-1	16p11.2	1160	Integrin alpha subunits	CAMs	Cell Adhesion Molecules	Integrins	Integrin alpha subunits
HGNC:6149	ITGAM	integrin subunit alpha M	CR3A, CD11B	MAC-1, CD11b	16p11.2	1160	Integrin alpha subunits	CAMs	Cell Adhesion Molecules	Integrins	Integrin alpha subunits
HGNC:6150	ITGAV	integrin subunit alpha V	VNRA, MSK8, VTNR	CD51	2q32.1	1160	Integrin alpha subunits	CAMs	Cell Adhesion Molecules	Integrins	Integrin alpha subunits
HGNC:6152	ITGAX	integrin subunit alpha X	CD11C	CD11c	16p11.2	1160	Integrin alpha subunits	CAMs	Cell Adhesion Molecules	Integrins	Integrin alpha subunits
HGNC:6153	ITGB1	integrin subunit beta 1	FNRB, MSK12, MDF2	CD29, GPIIA	10p11.22	1159	Integrin beta subunits	CAMs	Cell Adhesion Molecules	Integrins	Integrin beta subunits
HGNC:6155	ITGB2	integrin subunit beta 2	CD18, MFI7	LFA-1, MAC-1	21q22.3	1159	Integrin beta subunits	CAMs	Cell Adhesion Molecules	Integrins	Integrin beta subunits
HGNC:6156	ITGB3	integrin subunit beta 3	GP3A	CD61, GPIIIa	17q21.32	1159	Integrin beta subunits	CAMs	Cell Adhesion Molecules	Integrins	Integrin beta subunits
HGNC:6158	ITGB4	integrin subunit beta 4		CD104	17q25.1	1159	Integrin beta subunits	CAMs	Cell Adhesion Molecules	Integrins	Integrin beta subunits
HGNC:6160	ITGB5	integrin subunit beta 5			3q21.2	1159	Integrin beta subunits	CAMs	Cell Adhesion Molecules	Integrins	Integrin beta subunits
HGNC:6161	ITGB6	integrin subunit beta 6			2q24.2	1159	Integrin beta subunits	CAMs	Cell Adhesion Molecules	Integrins	Integrin beta subunits
HGNC:6162	ITGB7	integrin subunit beta 7			12q13.13	1159	Integrin beta subunits	CAMs	Cell Adhesion Molecules	Integrins	Integrin beta subunits
HGNC:6163	ITGB8	integrin subunit beta 8			7p21.1	1159	Integrin beta subunits	CAMs	Cell Adhesion Molecules	Integrins	Integrin beta subunits
HGNC:6164	ITGBL1	integrin subunit beta like 1		TIED, OSCP	13q33.1	1159	Integrin beta subunits	CAMs	Cell Adhesion Molecules	Integrins	Integrin beta subunits
HGNC:8011	CNTNAP1	contactin associated protein 1	NRXN4	p190, Caspr, CNTNAP	17q21.2	1969	Contactin associated protein family	CAMs	Cell Adhesion Molecules	Neurexins	Contactin associated protein family
HGNC:13830	CNTNAP2	contactin associated protein 2		Caspr2, KIAA0868, NRXN4	7q35-q36.1	1969	Contactin associated protein family	CAMs	Cell Adhesion Molecules	Neurexins	Contactin associated protein family
HGNC:13834	CNTNAP3	contactin associated protein family member 3		CASPR3, KIAA1714, FLJ14195, CNTNAP3A	9p12	1969	Contactin associated protein family	CAMs	Cell Adhesion Molecules	Neurexins	Contactin associated protein family
HGNC:32035	CNTNAP3B	contactin associated protein family member 3B			9p11.2	1969	Contactin associated protein family	CAMs	Cell Adhesion Molecules	Neurexins	Contactin associated protein family
HGNC:53878	CNTNAP3C	contactin associated protein family member 3C			9q12	1969	Contactin associated protein family	CAMs	Cell Adhesion Molecules	Neurexins	Contactin associated protein family
HGNC:18747	CNTNAP4	contactin associated protein family member 4		CASPR4, KIAA1763	16q23.1	1969	Contactin associated protein family	CAMs	Cell Adhesion Molecules	Neurexins	Contactin associated protein family
HGNC:18748	CNTNAP5	contactin associated protein family member 5		caspr5, FLJ31966	2q14.3	1969	Contactin associated protein family	CAMs	Cell Adhesion Molecules	Neurexins	Contactin associated protein family
HGNC:8008	NRXN1	neurexin 1		KIAA0578, Hs.22998	2p16.3	1582	Neurexins	CAMs	Cell Adhesion Molecules	Neurexins
HGNC:8009	NRXN2	neurexin 2			11q13.1	1582	Neurexins	CAMs	Cell Adhesion Molecules	Neurexins
HGNC:8010	NRXN3	neurexin 3	C14orf60	KIAA0743	14q24.3-q31.1	1582	Neurexins	CAMs	Cell Adhesion Molecules	Neurexins
HGNC:14291	NLGN1	neuroligin 1		KIAA1070	3q26.31	1583	Neuroligins	CAMs	Cell Adhesion Molecules	Neuroligins
HGNC:14290	NLGN2	neuroligin 2		KIAA1366	17p13.1	1583	Neuroligins	CAMs	Cell Adhesion Molecules	Neuroligins
HGNC:14289	NLGN3	neuroligin 3		HNL3, KIAA1480, ASPGX1, AUTSX1	Xq13.1	1583	Neuroligins	CAMs	Cell Adhesion Molecules	Neuroligins
HGNC:14287	NLGN4X	neuroligin 4 X-linked	NLGN4	KIAA1260, NLGN, HLNX	Xp22.32-p22.31	1583	Neuroligins	CAMs	Cell Adhesion Molecules	Neuroligins
HGNC:15529	NLGN4Y	neuroligin 4 Y-linked		KIAA0951	Yq11.221	1583	Neuroligins	CAMs	Cell Adhesion Molecules	Neuroligins
HGNC:4274	GJA1	gap junction protein alpha 1	ODDD,GJAL	CX43,ODD,ODOD,SDTY3	6q22.31	314	Gap Junction Proteins	Gap Junctions	Tetraspan junctional complex superfamily	Gap Junction Proteins
HGNC:4277	GJA3	gap junction protein alpha 3	CZP3	CX46	13q12.11	314	Gap Junction Proteins	Gap Junctions	Tetraspan junctional complex superfamily	Gap Junction Proteins
HGNC:4278	GJA4	gap junction protein alpha 4		CX37	1p34.3	314	Gap Junction Proteins	Gap Junctions	Tetraspan junctional complex superfamily	Gap Junction Proteins
HGNC:4279	GJA5	gap junction protein alpha 5		CX40	1q21.2	314	Gap Junction Proteins	Gap Junctions	Tetraspan junctional complex superfamily	Gap Junction Proteins
HGNC:32542	GJA6P	gap junction protein alpha 6, pseudogene			Xp22.13	314	Gap Junction Proteins	Gap Junctions	Tetraspan junctional complex superfamily	Gap Junction Proteins
HGNC:4281	GJA8	gap junction protein alpha 8	CAE1,CZP1,CAE	CX50	1q21.2	314	Gap Junction Proteins	Gap Junctions	Tetraspan junctional complex superfamily	Gap Junction Proteins
HGNC:19155	GJA9	gap junction protein alpha 9	GJA10	CX59,CX58	1p34.3	314	Gap Junction Proteins	Gap Junctions	Tetraspan junctional complex superfamily	Gap Junction Proteins
HGNC:16995	GJA10	gap junction protein alpha 10		CX62	6q15	314	Gap Junction Proteins	Gap Junctions	Tetraspan junctional complex superfamily	Gap Junction Proteins
HGNC:4283	GJB1	gap junction protein beta 1	CMTX1,CMTX	CX32	Xq13.1	314	Gap Junction Proteins	Gap Junctions	Tetraspan junctional complex superfamily	Gap Junction Proteins
HGNC:4284	GJB2	gap junction protein beta 2	DFNB1,DFNA3	CX26,NSRD1	13q12.11	314	Gap Junction Proteins	Gap Junctions	Tetraspan junctional complex superfamily	Gap Junction Proteins
HGNC:4285	GJB3	gap junction protein beta 3	DFNA2,EKV	CX31	1p34.3	314	Gap Junction Proteins	Gap Junctions	Tetraspan junctional complex superfamily	Gap Junction Proteins
HGNC:4286	GJB4	gap junction protein beta 4		CX30.3	1p34.3	314	Gap Junction Proteins	Gap Junctions	Tetraspan junctional complex superfamily	Gap Junction Proteins
HGNC:4287	GJB5	gap junction protein beta 5		CX31.1	1p34.3	314	Gap Junction Proteins	Gap Junctions	Tetraspan junctional complex superfamily	Gap Junction Proteins
HGNC:4288	GJB6	gap junction protein beta 6	DFNA3,ED2	EDH,HED,CX30	13q12.11	314	Gap Junction Proteins	Gap Junctions	Tetraspan junctional complex superfamily	Gap Junction Proteins
HGNC:16690	GJB7	gap junction protein beta 7		CX25,bA136M9.1	6q14.3-q15	314	Gap Junction Proteins	Gap Junctions	Tetraspan junctional complex superfamily	Gap Junction Proteins
HGNC:4280	GJC1	gap junction protein gamma 1	GJA7	CX45	17q21.31	314	Gap Junction Proteins	Gap Junctions	Tetraspan junctional complex superfamily	Gap Junction Proteins
HGNC:17494	GJC2	gap junction protein gamma 2	GJA12	CX47,CX46.6,SPG44	1q42.13	314	Gap Junction Proteins	Gap Junctions	Tetraspan junctional complex superfamily	Gap Junction Proteins
HGNC:17495	GJC3	gap junction protein gamma 3	GJE1	CX30.2	7q22.1	314	Gap Junction Proteins	Gap Junctions	Tetraspan junctional complex superfamily	Gap Junction Proteins
HGNC:19154	GJD2	gap junction protein delta 2	GJA9	CX36	15q14	314	Gap Junction Proteins	Gap Junctions	Tetraspan junctional complex superfamily	Gap Junction Proteins
HGNC:19147	GJD3	gap junction protein delta 3	GJC1	CX31.9,GJA11,Cx30.2	17q21.2	314	Gap Junction Proteins	Gap Junctions	Tetraspan junctional complex superfamily	Gap Junction Proteins
HGNC:23296	GJD4	gap junction protein delta 4		CX40.1,FLJ90023	10p11.21	314	Gap Junction Proteins	Gap Junctions	Tetraspan junctional complex superfamily	Gap Junction Proteins
HGNC:33251	GJE1	gap junction protein epsilon 1		CX23	6q24.1	314	Gap Junction Proteins	Gap Junctions	Tetraspan junctional complex superfamily	Gap Junction Proteins
HGNC:2032	CLDN1	claudin 1		SEMP1,ILVASC	3q28	488	Claudins	Tight Junctions	Tetraspan junctional complex superfamily	Claudins
HGNC:2041	CLDN2	claudin 2			Xq22.3	488	Claudins	Tight Junctions	Tetraspan junctional complex superfamily	Claudins
HGNC:2045	CLDN3	claudin 3	C7orf1,CPETR2	RVP1,CPE-R2,HRVP1	7q11.23	488	Claudins	Tight Junctions	Tetraspan junctional complex superfamily	Claudins
HGNC:2046	CLDN4	claudin 4	CPETR,CPETR1	CPE-R,WBSCR8,hCPE-R	7q11.23	488	Claudins	Tight Junctions	Tetraspan junctional complex superfamily	Claudins
HGNC:2047	CLDN5	claudin 5	AWAL,TMVCF	CPETRL1,BEC1	22q11.21	488	Claudins	Tight Junctions	Tetraspan junctional complex superfamily	Claudins
HGNC:2048	CLDN6	claudin 6			16p13.3	488	Claudins	Tight Junctions	Tetraspan junctional complex superfamily	Claudins
HGNC:2049	CLDN7	claudin 7	CEPTRL2,CPETRL2	Hs.84359	17p13.1	488	Claudins	Tight Junctions	Tetraspan junctional complex superfamily	Claudins
HGNC:2050	CLDN8	claudin 8			21q22.11	488	Claudins	Tight Junctions	Tetraspan junctional complex superfamily	Claudins
HGNC:2051	CLDN9	claudin 9			16p13.3	488	Claudins	Tight Junctions	Tetraspan junctional complex superfamily	Claudins
HGNC:2033	CLDN10	claudin 10		OSP-L,CPETRL3	13q32.1	488	Claudins	Tight Junctions	Tetraspan junctional complex superfamily	Claudins
HGNC:8514	CLDN11	claudin 11	OTM	OSP	3q26.2	488	Claudins	Tight Junctions	Tetraspan junctional complex superfamily	Claudins
HGNC:2034	CLDN12	claudin 12			7q21.13	488	Claudins	Tight Junctions	Tetraspan junctional complex superfamily	Claudins
HGNC:2035	CLDN14	claudin 14	DFNB29		21q22.13	488	Claudins	Tight Junctions	Tetraspan junctional complex superfamily	Claudins
HGNC:2036	CLDN15	claudin 15			7q22.1	488	Claudins	Tight Junctions	Tetraspan junctional complex superfamily	Claudins
HGNC:2037	CLDN16	claudin 16		PCLN1,HOMG3	3q28	488	Claudins	Tight Junctions	Tetraspan junctional complex superfamily	Claudins
HGNC:2038	CLDN17	claudin 17		MGC126552,MGC126554	21q21.3	488	Claudins	Tight Junctions	Tetraspan junctional complex superfamily	Claudins
HGNC:2039	CLDN18	claudin 18	SFTPJ		3q22.3	488	Claudins	Tight Junctions	Tetraspan junctional complex superfamily	Claudins
HGNC:2040	CLDN19	claudin 19			1p34.2	488	Claudins	Tight Junctions	Tetraspan junctional complex superfamily	Claudins
HGNC:2042	CLDN20	claudin 20			6q25.3	488	Claudins	Tight Junctions	Tetraspan junctional complex superfamily	Claudins
HGNC:2044	CLDN22	claudin 22		CLDN21	4q35.1	488	Claudins	Tight Junctions	Tetraspan junctional complex superfamily	Claudins
HGNC:17591	CLDN23	claudin 23		CLDNL	8p23.1	488	Claudins	Tight Junctions	Tetraspan junctional complex superfamily	Claudins
HGNC:37200	CLDN24	claudin 24	CLDN21		4q35.1	488	Claudins	Tight Junctions	Tetraspan junctional complex superfamily	Claudins
HGNC:37218	CLDN25	claudin 25			11q23.2	488	Claudins	Tight Junctions	Tetraspan junctional complex superfamily	Claudins
HGNC:8104	OCLN	occludin		PPP1R115	5q13.2	1626	MARVEL domain containing	Tight Junctions	Tetraspan junctional complex superfamily, MARVEL domain containing
HGNC:26401	MARVELD2	MARVEL domain containing 2	MRVLDC2,DFNB49	FLJ30532,TRIC	5q13.2	1626	MARVEL domain containing	Tight Junctions	MARVEL domain containing
HGNC:30525	MARVELD3	MARVEL domain containing 3	MRVLDC3		16q22.2	1626	MARVEL domain containing	Tight Junctions	MARVEL domain containing
HGNC:29572	LSR	lipolysis stimulated lipoprotein receptor		LISCH7,ILDR3	19q13.12	594	Immunoglobulin like domain containing	Tight Junctions	Immunoglobulin like domain containing

## Sheet: B Jxnal Genes Lepage Test
GeneSYM	Lepage.p.value.LEP	Modulation.LEP	Lepage.p.value.MEP	Modulation.MEP
DSG3	0.0028	Modulated with Age	0.0122	Modulated with Age
LRRC4	0.0133	Modulated with Age	0.0017	Modulated with Age
PCDHB3	0.026	Modulated with Age	0.0393	Modulated with Age
CELSR3	0.0001	Modulated with Age	0.8599	No Significant Change
CLDN11	0.0008	Modulated with Age	0.3467	No Significant Change
DSC3	0.0015	Modulated with Age	0.5285	No Significant Change
PCDHGA4	0.0029	Modulated with Age	0.5872	No Significant Change
NCAM2	0.004	Modulated with Age	0.2096	No Significant Change
CDH13	0.0059	Modulated with Age	0.0948	No Significant Change
NLGN2	0.0064	Modulated with Age	0.5771	No Significant Change
CLDN6	0.0081	Modulated with Age	0.6171	No Significant Change
CNTN1	0.0091	Modulated with Age	0.0553	No Significant Change
CLSTN2	0.0149	Modulated with Age	0.6776	No Significant Change
GJA1	0.0208	Modulated with Age	0.4295	No Significant Change
PCDH18	0.0253	Modulated with Age	0.9594	No Significant Change
PCDHA5	0.0279	Modulated with Age	0.1709	No Significant Change
FAT4	0.0321	Modulated with Age	0.2705	No Significant Change
CLDN10	0.0326	Modulated with Age	0.9045	No Significant Change
CDH15	0.0338	Modulated with Age	0.4777	No Significant Change
PCDHA10	0.0354	Modulated with Age	0.2752	No Significant Change
ITGA6	0.0355	Modulated with Age	0.2201	No Significant Change
OCLN	0.0371	Modulated with Age	0.6271	No Significant Change
JAM3	0.0372	Modulated with Age	0.5012	No Significant Change
PCDHGC3	0.04	Modulated with Age	0.9422	No Significant Change
ITGAE	0.0449	Modulated with Age	0.1169	No Significant Change
NECTIN1	0.0455	Modulated with Age	0.1886	No Significant Change
CEACAM5	0.0472	Modulated with Age	0.8373	No Significant Change
FAT1	0.0479	Modulated with Age	0.2602	No Significant Change
CLDN7	0.0497	Modulated with Age	0.2061	No Significant Change
GJB6	0.0586	No Significant Change	0.0178	Modulated with Age
UNC5D	0.1342	No Significant Change	0.0331	Modulated with Age
ITGA11	0.1575	No Significant Change	0.0045	Modulated with Age
DSCAML1	0.3054	No Significant Change	0.0283	Modulated with Age
PCDHAC2	0.3414	No Significant Change	0.0145	Modulated with Age
NTM	0.4024	No Significant Change	0.0203	Modulated with Age
CELSR2	0.533	No Significant Change	0.0186	Modulated with Age
PCDHGA11	0.7009	No Significant Change	0.0001	Modulated with Age
PCDHGC5	0.7288	No Significant Change	0.0117	Modulated with Age
CADM3	0.827	No Significant Change	0.0411	Modulated with Age
CEACAM1	0.8812	No Significant Change	0.0427	Modulated with Age
DSCAM	0.8992	No Significant Change	0.0486	Modulated with Age
RET	0.9052	No Significant Change	0.0379	Modulated with Age
