# Supplementary material for: Luminal epithelial cells integrate variable responses to aging into stereotypical changes that underlie breast cancer susceptibility
Source: eLife. 2024 Nov 15;13:e95720. doi: 10.7554/eLife.95720 (PMC11723586; doi:10.7554/eLife.95720)
Supplement: Figure 7—source data 1. — Comparison of gene expression levels of age-dependent DE and DV genes from LEPs in the TCGA cohort. (A) Kruskal-Wallis test was performed across PAM50 breast cancer subtypes as well as matched normal tissue; p-values were adjusted across all age-dependent DE and DV genes. Significance defined at adj. p<0.05. (B) Post hoc pairwise comparison between groups was performed using Wilcoxon test for genes with KW adj. p<0.05. Wilcoxon p-values were adjusted across pairwise subtype comparisons within each gene (adj.p), and across pairwise subtype comparisons in each gene and across all significant DE and DV genes (adj.p.multi). Significance defined at adj. p multi < 0.05. [file elife-95720-fig7-data1.xlsx]

## Sheet: A TCGA Kruskal Wallis Test
GeneSYM	n	statistic	df	p	p.adj	p.adj.signif	adj.p.print.label
AACS	1201	38.8209	5	2.58e-07	2.80373e-07	****	KW adj. p < 0.0001
ABCA10	1201	479.483	5	2.14e-101	7.00256e-100	****	KW adj. p < 0.0001
ABCC2	1201	179.333	5	7.43e-37	1.63905e-36	****	KW adj. p < 0.0001
ABLIM3	1201	495.427	5	7.75e-105	3.04317e-103	****	KW adj. p < 0.0001
ABRACL	1201	419.824	5	1.58e-88	2.58506e-87	****	KW adj. p < 0.0001
AC005083.1	1201	40.4788	5	1.2e-07	1.31132e-07	****	KW adj. p < 0.0001
AC011747.4	1201	172.082	5	2.62e-35	5.49174e-35	****	KW adj. p < 0.0001
AC093627.10	1201	242.47	5	2.27e-50	7.22719e-50	****	KW adj. p < 0.0001
AC098617.1	1201	413.367	5	3.9e-87	5.74275e-86	****	KW adj. p < 0.0001
ACBD5	1201	96.1899	5	3.35e-19	4.63181e-19	****	KW adj. p < 0.0001
ACTR3B	1201	255.829	5	3.09e-53	1.07693e-52	****	KW adj. p < 0.0001
ACVR1C	1201	285.995	5	1.03e-59	4.46081e-59	****	KW adj. p < 0.0001
ADCY7	1201	96.5007	5	2.89e-19	4.0052e-19	****	KW adj. p < 0.0001
ADGRG2	1201	257.896	5	1.11e-53	3.96236e-53	****	KW adj. p < 0.0001
ADPRHL1	1201	125.344	5	2.31e-25	3.73788e-25	****	KW adj. p < 0.0001
AFAP1-AS1	1201	247.887	5	1.56e-51	5.19119e-51	****	KW adj. p < 0.0001
AKAP1	1201	131.991	5	9e-27	1.51457e-26	****	KW adj. p < 0.0001
AL450992.2	1201	75.9238	5	5.97e-15	7.51353e-15	****	KW adj. p < 0.0001
ALDH1L2	1201	76.6485	5	4.21e-15	5.33267e-15	****	KW adj. p < 0.0001
ALDH3A1	1201	337.352	5	9.24e-71	6.71896e-70	****	KW adj. p < 0.0001
ALDH3A2	1201	223.805	5	2.27e-46	6.42803e-46	****	KW adj. p < 0.0001
ALDH3B1	1201	21.9081	5	0.000545	0.000560218	***	KW adj. p < 0.001
ALDH9A1	1201	54.3779	5	1.75e-10	2.00926e-10	****	KW adj. p < 0.0001
AMN	1201	210.501	5	1.61e-43	4.19597e-43	****	KW adj. p < 0.0001
ANKH	1201	114.936	5	3.71e-23	5.63193e-23	****	KW adj. p < 0.0001
ANKRD10	1201	88.1802	5	1.62e-17	2.16367e-17	****	KW adj. p < 0.0001
ANKRD35	1201	391.966	5	1.6e-82	1.81231e-81	****	KW adj. p < 0.0001
ANKRD65	1201	341.914	5	9.63e-72	7.27188e-71	****	KW adj. p < 0.0001
ANKRD7	1201	165.726	5	5.95e-34	1.21265e-33	****	KW adj. p < 0.0001
AP006621.6	1201	73.3476	5	2.06e-14	2.57064e-14	****	KW adj. p < 0.0001
APBA2	1201	319.064	5	7.96e-67	4.7358e-66	****	KW adj. p < 0.0001
APBB3	1201	163.646	5	1.65e-33	3.30561e-33	****	KW adj. p < 0.0001
APOBEC3D	1201	38.1269	5	3.56e-07	3.85449e-07	****	KW adj. p < 0.0001
APOL3	1201	110.018	5	4.06e-22	6.00839e-22	****	KW adj. p < 0.0001
ARHGAP19	1201	181.055	5	3.19e-37	7.14414e-37	****	KW adj. p < 0.0001
ARHGEF40	1201	418.971	5	2.41e-88	3.7355e-87	****	KW adj. p < 0.0001
ARL11	1201	66.9772	5	4.36e-13	5.29493e-13	****	KW adj. p < 0.0001
ARL2BP	1201	68.7773	5	1.84e-13	2.24381e-13	****	KW adj. p < 0.0001
ARL4A	1201	307.315	5	2.68e-64	1.37263e-63	****	KW adj. p < 0.0001
ARL4D	1201	151.231	5	7.3e-31	1.37371e-30	****	KW adj. p < 0.0001
ARMC7	1201	160.859	5	6.49e-33	1.28276e-32	****	KW adj. p < 0.0001
ARSJ	1201	93.7727	5	1.08e-18	1.47935e-18	****	KW adj. p < 0.0001
ATP10B	1201	284.487	5	2.16e-59	9.28642e-59	****	KW adj. p < 0.0001
ATP2A2	1201	96.1894	5	3.36e-19	4.63475e-19	****	KW adj. p < 0.0001
ATP2B1	1201	124.905	5	2.87e-25	4.61866e-25	****	KW adj. p < 0.0001
ATP6AP1L	1201	322.205	5	1.68e-67	1.02012e-66	****	KW adj. p < 0.0001
ATP7B	1201	457.093	5	1.45e-96	3.71326e-95	****	KW adj. p < 0.0001
AZIN2	1201	293.517	5	2.48e-61	1.12363e-60	****	KW adj. p < 0.0001
B2M	1201	24.783	5	0.000153	0.000158378	***	KW adj. p < 0.001
B4GALNT4	1201	194.476	5	4.31e-40	1.04041e-39	****	KW adj. p < 0.0001
BAIAP2L2	1201	226.269	5	6.74e-47	1.96528e-46	****	KW adj. p < 0.0001
BATF	1201	212.145	5	7.15e-44	1.88007e-43	****	KW adj. p < 0.0001
BCL11A	1201	605.904	5	1.07e-128	3.15115e-126	****	KW adj. p < 0.0001
BCL2L14	1201	199.958	5	2.9e-41	7.17689e-41	****	KW adj. p < 0.0001
BCO2	1201	155.36	5	9.64e-32	1.84349e-31	****	KW adj. p < 0.0001
BEGAIN	1201	218.277	5	3.48e-45	9.76057e-45	****	KW adj. p < 0.0001
BLCAP	1201	249.962	5	5.6e-52	1.89563e-51	****	KW adj. p < 0.0001
BRINP2	1201	78.9799	5	1.37e-15	1.7542e-15	****	KW adj. p < 0.0001
BTBD11	1201	233.754	5	1.68e-48	5.07446e-48	****	KW adj. p < 0.0001
BTN2A1	1201	108.999	5	6.67e-22	9.84619e-22	****	KW adj. p < 0.0001
BTN3A1	1201	57.5139	5	3.96e-11	4.62786e-11	****	KW adj. p < 0.0001
BTN3A3	1201	50.3648	5	1.17e-09	1.32271e-09	****	KW adj. p < 0.0001
C15orf48	1201	116.771	5	1.52e-23	2.33755e-23	****	KW adj. p < 0.0001
C16orf62	1201	148.452	5	2.85e-30	5.31218e-30	****	KW adj. p < 0.0001
C22orf29	1201	4.16031	5	0.527	0.527896	ns	KW adj. p = ns
C4orf26	1201	101.144	5	3.03e-20	4.30041e-20	****	KW adj. p < 0.0001
C5orf38	1201	40.6621	5	1.1e-07	1.20428e-07	****	KW adj. p < 0.0001
C5orf56	1201	116.218	5	1.98e-23	3.02914e-23	****	KW adj. p < 0.0001
C6orf47	1201	70.445	5	8.28e-14	1.01602e-13	****	KW adj. p < 0.0001
C9orf66	1201	158.413	5	2.16e-32	4.22671e-32	****	KW adj. p < 0.0001
CACNA2D1	1201	298.64	5	1.96e-62	9.23552e-62	****	KW adj. p < 0.0001
CAPN8	1201	489.25	5	1.67e-103	6.14769e-102	****	KW adj. p < 0.0001
CARD11	1201	54.9609	5	1.33e-10	1.53602e-10	****	KW adj. p < 0.0001
CASC10	1201	217.951	5	4.08e-45	1.13355e-44	****	KW adj. p < 0.0001
CBWD5	1201	129.144	5	3.62e-26	5.92272e-26	****	KW adj. p < 0.0001
CBX2	1201	498.733	5	1.5e-105	6.79615e-104	****	KW adj. p < 0.0001
CCDC185	1201	127.366	5	8.62e-26	1.40642e-25	****	KW adj. p < 0.0001
CCNYL1	1201	163.338	5	1.92e-33	3.83349e-33	****	KW adj. p < 0.0001
CD40	1201	173.988	5	1.03e-35	2.17444e-35	****	KW adj. p < 0.0001
CDC42BPG	1201	143.854	5	2.71e-29	4.85164e-29	****	KW adj. p < 0.0001
CDH13	1201	289.824	5	1.54e-60	6.82e-60	****	KW adj. p < 0.0001
CDK12	1201	112.01	5	1.54e-22	2.29056e-22	****	KW adj. p < 0.0001
CDK5R1	1201	209.329	5	2.87e-43	7.44683e-43	****	KW adj. p < 0.0001
CDKL5	1201	33.6819	5	2.75e-06	2.90799e-06	****	KW adj. p < 0.0001
CDON	1201	301.149	5	5.67e-63	2.69325e-62	****	KW adj. p < 0.0001
CELSR3	1201	179.372	5	7.29e-37	1.61421e-36	****	KW adj. p < 0.0001
CES1	1201	357.854	5	3.56e-75	2.9533e-74	****	KW adj. p < 0.0001
CHID1	1201	56.5336	5	6.31e-11	7.34504e-11	****	KW adj. p < 0.0001
CHODL	1201	595.565	5	1.84e-126	3.61253e-124	****	KW adj. p < 0.0001
CHST3	1201	581.159	5	2.38e-123	3.50455e-121	****	KW adj. p < 0.0001
CLCN3	1201	108.91	5	6.96e-22	1.02486e-21	****	KW adj. p < 0.0001
CLCN4	1201	568.4	5	1.36e-120	1.60208e-118	****	KW adj. p < 0.0001
CLDN10	1201	302.428	5	3.01e-63	1.45319e-62	****	KW adj. p < 0.0001
CLDN11	1201	460.321	5	2.92e-97	7.81764e-96	****	KW adj. p < 0.0001
CLDND1	1201	140.925	5	1.14e-28	2.00436e-28	****	KW adj. p < 0.0001
CLEC16A	1201	88.7728	5	1.22e-17	1.63314e-17	****	KW adj. p < 0.0001
CLSTN2	1201	529.32	5	3.74e-112	3.14694e-110	****	KW adj. p < 0.0001
CLTCL1	1201	181.73	5	2.29e-37	5.16785e-37	****	KW adj. p < 0.0001
CNTN1	1201	206.532	5	1.14e-42	2.90675e-42	****	KW adj. p < 0.0001
COBLL1	1201	209.095	5	3.21e-43	8.2925e-43	****	KW adj. p < 0.0001
COL4A6	1201	378.414	5	1.33e-79	1.32775e-78	****	KW adj. p < 0.0001
COL8A1	1201	121.204	5	1.74e-24	2.74027e-24	****	KW adj. p < 0.0001
COLCA2	1201	333.987	5	4.9e-70	3.35593e-69	****	KW adj. p < 0.0001
COPZ2	1201	177.906	5	1.5e-36	3.27222e-36	****	KW adj. p < 0.0001
CORO6	1201	156.394	5	5.81e-32	1.11833e-31	****	KW adj. p < 0.0001
CPNE4	1201	76.071	5	5.56e-15	7.01251e-15	****	KW adj. p < 0.0001
CPS1	1201	249.033	5	8.86e-52	2.96508e-51	****	KW adj. p < 0.0001
CRAT	1201	313.12	5	1.51e-65	8.39047e-65	****	KW adj. p < 0.0001
CREB3L1	1201	420.659	5	1.04e-88	1.80165e-87	****	KW adj. p < 0.0001
CSF2	1201	141.076	5	1.06e-28	1.86928e-28	****	KW adj. p < 0.0001
CTA-126B4.7	1201	157.187	5	3.94e-32	7.65894e-32	****	KW adj. p < 0.0001
CTA-228A9.3	1201	9.04453	5	0.107	0.107732	ns	KW adj. p = ns
CTB-70G10.1	1201	6.55714	5	0.256	0.257311	ns	KW adj. p = ns
CTC-260E6.6	1201	116.909	5	1.42e-23	2.19522e-23	****	KW adj. p < 0.0001
CTC-360G5.9	1201	245.404	5	5.32e-51	1.75055e-50	****	KW adj. p < 0.0001
CTC-459F4.3	1201	113.563	5	7.23e-23	1.08634e-22	****	KW adj. p < 0.0001
CTD-2194D22.3	1201	70.7524	5	7.15e-14	8.82883e-14	****	KW adj. p < 0.0001
CTD-2201E18.3	1201	154.812	5	1.26e-31	2.394e-31	****	KW adj. p < 0.0001
CTD-2269F5.1	1201	78.8997	5	1.43e-15	1.82705e-15	****	KW adj. p < 0.0001
CTR9	1201	226.084	5	7.39e-47	2.14419e-46	****	KW adj. p < 0.0001
CTSA	1201	132.821	5	6e-27	1.01552e-26	****	KW adj. p < 0.0001
CUEDC1	1201	232.73	5	2.78e-48	8.35418e-48	****	KW adj. p < 0.0001
CYTH1	1201	69.234	5	1.48e-13	1.80855e-13	****	KW adj. p < 0.0001
DAG1	1201	25.7052	5	0.000102	0.000105771	***	KW adj. p < 0.001
DAPK1	1201	225.851	5	8.29e-47	2.39353e-46	****	KW adj. p < 0.0001
DBN1	1201	143.667	5	2.97e-29	5.301e-29	****	KW adj. p < 0.0001
DGAT1	1201	32.2927	5	5.2e-06	5.47907e-06	****	KW adj. p < 0.0001
DIP2C	1201	143.284	5	3.58e-29	6.35127e-29	****	KW adj. p < 0.0001
DISC1	1201	205.45	5	1.94e-42	4.92526e-42	****	KW adj. p < 0.0001
DMRTA1	1201	249.95	5	5.64e-52	1.89826e-51	****	KW adj. p < 0.0001
DNAH2	1201	36.9887	5	6.02e-07	6.4941e-07	****	KW adj. p < 0.0001
DNMBP-AS1	1201	212.311	5	6.59e-44	1.74843e-43	****	KW adj. p < 0.0001
DOK7	1201	359.015	5	2e-75	1.68286e-74	****	KW adj. p < 0.0001
DOPEY2	1201	306.334	5	4.35e-64	2.18987e-63	****	KW adj. p < 0.0001
DPP4	1201	202.565	5	8.03e-42	2.01263e-41	****	KW adj. p < 0.0001
DSC3	1201	432.622	5	2.75e-91	5.78482e-90	****	KW adj. p < 0.0001
DSG3	1201	345.39	5	1.72e-72	1.31569e-71	****	KW adj. p < 0.0001
DTNBP1	1201	83.2968	5	1.71e-16	2.22338e-16	****	KW adj. p < 0.0001
DUSP2	1201	149.982	5	1.35e-30	2.53232e-30	****	KW adj. p < 0.0001
DUXAP8	1201	122.567	5	8.97e-25	1.42408e-24	****	KW adj. p < 0.0001
EDN2	1201	145.5	5	1.21e-29	2.18617e-29	****	KW adj. p < 0.0001
EFHD1	1201	183.401	5	1e-37	2.27413e-37	****	KW adj. p < 0.0001
EFNA1	1201	189.697	5	4.54e-39	1.07825e-38	****	KW adj. p < 0.0001
EFNB1	1201	351.247	5	9.43e-74	7.60859e-73	****	KW adj. p < 0.0001
EGFLAM	1201	407.892	5	5.91e-86	8.28709e-85	****	KW adj. p < 0.0001
EHF	1201	54.3463	5	1.78e-10	2.03973e-10	****	KW adj. p < 0.0001
EIF4EBP1	1201	263.285	5	7.74e-55	2.84929e-54	****	KW adj. p < 0.0001
EIF5	1201	103.035	5	1.21e-20	1.73404e-20	****	KW adj. p < 0.0001
ELF5	1201	431.443	5	4.94e-91	9.69887e-90	****	KW adj. p < 0.0001
ELOVL4	1201	193.295	5	7.71e-40	1.83854e-39	****	KW adj. p < 0.0001
EMB	1201	65.6245	5	8.32e-13	1.00214e-12	****	KW adj. p < 0.0001
EMP1	1201	312.214	5	2.37e-65	1.29253e-64	****	KW adj. p < 0.0001
EMP2	1201	313.838	5	1.06e-65	5.9461e-65	****	KW adj. p < 0.0001
EOGT	1201	406.213	5	1.36e-85	1.82055e-84	****	KW adj. p < 0.0001
ERC1	1201	54.3168	5	1.8e-10	2.05864e-10	****	KW adj. p < 0.0001
ERRFI1	1201	291.371	5	7.17e-61	3.19934e-60	****	KW adj. p < 0.0001
ESR1	1201	743.134	5	2.31e-158	1.36059e-155	****	KW adj. p < 0.0001
FA2H	1201	158.876	5	1.72e-32	3.37693e-32	****	KW adj. p < 0.0001
FAM118A	1201	57.3916	5	4.2e-11	4.89861e-11	****	KW adj. p < 0.0001
FAM134B	1201	431.627	5	4.51e-91	9.15997e-90	****	KW adj. p < 0.0001
FAM171B	1201	86.8033	5	3.15e-17	4.18815e-17	****	KW adj. p < 0.0001
FAM198B	1201	462.359	5	1.06e-97	2.97305e-96	****	KW adj. p < 0.0001
FAM228A	1201	247.093	5	2.31e-51	7.64376e-51	****	KW adj. p < 0.0001
FAM3D	1201	303.672	5	1.63e-63	8.00058e-63	****	KW adj. p < 0.0001
FAM65B	1201	104.052	5	7.39e-21	1.06684e-20	****	KW adj. p < 0.0001
FAS	1201	194.445	5	4.38e-40	1.05299e-39	****	KW adj. p < 0.0001
FBXL16	1201	326.934	5	1.61e-68	1.04208e-67	****	KW adj. p < 0.0001
FCHSD2	1201	23.1382	5	0.000318	0.000327451	***	KW adj. p < 0.001
FDFT1	1201	49.0912	5	2.13e-09	2.39422e-09	****	KW adj. p < 0.0001
FDX1	1201	187.681	5	1.22e-38	2.86287e-38	****	KW adj. p < 0.0001
FGF7P3	1201	133.833	5	3.65e-27	6.23145e-27	****	KW adj. p < 0.0001
FHOD3	1201	265.434	5	2.67e-55	9.95335e-55	****	KW adj. p < 0.0001
FIBP	1201	183.24	5	1.09e-37	2.46927e-37	****	KW adj. p < 0.0001
FKBP5	1201	67.5219	5	3.36e-13	4.08893e-13	****	KW adj. p < 0.0001
FMO2	1201	433.524	5	1.76e-91	3.98708e-90	****	KW adj. p < 0.0001
FMO6P	1201	432.787	5	2.53e-91	5.51915e-90	****	KW adj. p < 0.0001
FN1	1201	250.059	5	5.34e-52	1.81807e-51	****	KW adj. p < 0.0001
FOXO3	1201	66.5663	5	5.3e-13	6.42325e-13	****	KW adj. p < 0.0001
FOXP1	1201	334.374	5	4.04e-70	2.79948e-69	****	KW adj. p < 0.0001
FUT2	1201	93.6305	5	1.16e-18	1.58157e-18	****	KW adj. p < 0.0001
FUT6	1201	91.6701	5	2.99e-18	4.03924e-18	****	KW adj. p < 0.0001
FZD2	1201	168.969	5	1.21e-34	2.48324e-34	****	KW adj. p < 0.0001
GALNT12	1201	238.669	5	1.48e-49	4.56398e-49	****	KW adj. p < 0.0001
GBP3	1201	53.3773	5	2.81e-10	3.20133e-10	****	KW adj. p < 0.0001
GCC1	1201	19.3736	5	0.00164	0.00167411	**	KW adj. p < 0.01
GCNT2	1201	331.456	5	1.72e-69	1.13829e-68	****	KW adj. p < 0.0001
GDI1	1201	272.728	5	7.26e-57	2.96954e-56	****	KW adj. p < 0.0001
GIN1	1201	420.294	5	1.25e-88	2.10357e-87	****	KW adj. p < 0.0001
GLI1	1201	263.766	5	6.1e-55	2.25969e-54	****	KW adj. p < 0.0001
GLTSCR1	1201	116.703	5	1.57e-23	2.40815e-23	****	KW adj. p < 0.0001
GPC2	1201	272.992	5	6.37e-57	2.62373e-56	****	KW adj. p < 0.0001
GPC4	1201	131.632	5	1.07e-26	1.79553e-26	****	KW adj. p < 0.0001
GPR108	1201	78.983	5	1.37e-15	1.7542e-15	****	KW adj. p < 0.0001
GPR161	1201	351.878	5	6.9e-74	5.64458e-73	****	KW adj. p < 0.0001
GPSM3	1201	46.712	5	6.5e-09	7.22358e-09	****	KW adj. p < 0.0001
GREB1L	1201	305.057	5	8.19e-64	4.05371e-63	****	KW adj. p < 0.0001
GRHL2	1201	187.591	5	1.28e-38	2.99175e-38	****	KW adj. p < 0.0001
GRIK2	1201	27.5375	5	4.48e-05	4.66205e-05	****	KW adj. p < 0.0001
GRK3	1201	259.05	5	6.28e-54	2.25544e-53	****	KW adj. p < 0.0001
GSTK1	1201	100.458	5	4.23e-20	5.98911e-20	****	KW adj. p < 0.0001
GSTM2	1201	393.941	5	6e-83	7.13868e-82	****	KW adj. p < 0.0001
HARS2	1201	239.776	5	8.57e-50	2.6567e-49	****	KW adj. p < 0.0001
HAS3	1201	274.408	5	3.16e-57	1.31073e-56	****	KW adj. p < 0.0001
HAUS6	1201	143.322	5	3.52e-29	6.26369e-29	****	KW adj. p < 0.0001
HCP5	1201	47.2747	5	4.99e-09	5.5665e-09	****	KW adj. p < 0.0001
HECTD2	1201	271.929	5	1.08e-56	4.35699e-56	****	KW adj. p < 0.0001
HES2	1201	64.8472	5	1.21e-12	1.44562e-12	****	KW adj. p < 0.0001
HES4	1201	73.3151	5	2.09e-14	2.60256e-14	****	KW adj. p < 0.0001
HEY2	1201	169.053	5	1.16e-34	2.38895e-34	****	KW adj. p < 0.0001
HIST1H4C	1201	135.865	5	1.35e-27	2.34558e-27	****	KW adj. p < 0.0001
HK2	1201	60.7787	5	8.39e-12	9.88342e-12	****	KW adj. p < 0.0001
HLA-A	1201	117.867	5	8.88e-24	1.38003e-23	****	KW adj. p < 0.0001
HLA-B	1201	84.589	5	9.18e-17	1.20156e-16	****	KW adj. p < 0.0001
HLA-DPB1	1201	64.941	5	1.15e-12	1.37673e-12	****	KW adj. p < 0.0001
HNF4G	1201	80.0742	5	8.1e-16	1.04168e-15	****	KW adj. p < 0.0001
HOOK2	1201	96.7712	5	2.53e-19	3.51455e-19	****	KW adj. p < 0.0001
HOXC10	1201	130.15	5	2.21e-26	3.66673e-26	****	KW adj. p < 0.0001
HOXC6	1201	210.918	5	1.31e-43	3.42929e-43	****	KW adj. p < 0.0001
HPD	1201	226.51	5	5.99e-47	1.76406e-46	****	KW adj. p < 0.0001
HRASLS	1201	349.367	5	2.4e-73	1.91027e-72	****	KW adj. p < 0.0001
HSD11B2	1201	54.6768	5	1.52e-10	1.74859e-10	****	KW adj. p < 0.0001
HSD17B1	1201	125.227	5	2.45e-25	3.95356e-25	****	KW adj. p < 0.0001
HSPA12A	1201	260.803	5	2.64e-54	9.65814e-54	****	KW adj. p < 0.0001
HSPA4L	1201	170.547	5	5.58e-35	1.16547e-34	****	KW adj. p < 0.0001
IFI16	1201	198.748	5	5.26e-41	1.29089e-40	****	KW adj. p < 0.0001
IFNAR2	1201	335.413	5	2.42e-70	1.69688e-69	****	KW adj. p < 0.0001
IFT43	1201	266.775	5	1.38e-55	5.21038e-55	****	KW adj. p < 0.0001
IGFBP2	1201	178.825	5	9.54e-37	2.08887e-36	****	KW adj. p < 0.0001
IGFL2	1201	162.806	5	2.5e-33	4.97466e-33	****	KW adj. p < 0.0001
IGSF9B	1201	279.466	5	2.59e-58	1.08965e-57	****	KW adj. p < 0.0001
IL17RC	1201	38.1719	5	3.48e-07	3.77481e-07	****	KW adj. p < 0.0001
IRF1	1201	47.1827	5	5.21e-09	5.80093e-09	****	KW adj. p < 0.0001
KB-1991G8.1	1201	331.28	5	1.87e-69	1.22381e-68	****	KW adj. p < 0.0001
KCNIP3	1201	112.852	5	1.02e-22	1.5287e-22	****	KW adj. p < 0.0001
KCNJ6	1201	115.908	5	2.31e-23	3.52484e-23	****	KW adj. p < 0.0001
KCNQ4	1201	488.883	5	2e-103	6.92941e-102	****	KW adj. p < 0.0001
KCTD13	1201	202.29	5	9.19e-42	2.29361e-41	****	KW adj. p < 0.0001
KDM2B	1201	198.878	5	4.94e-41	1.21743e-40	****	KW adj. p < 0.0001
KIAA0319	1201	132.718	5	6.3e-27	1.06324e-26	****	KW adj. p < 0.0001
KIAA0355	1201	242.814	5	1.91e-50	6.14749e-50	****	KW adj. p < 0.0001
KIAA0895	1201	98.5713	5	1.06e-19	1.49007e-19	****	KW adj. p < 0.0001
KIAA1147	1201	9.42625	5	0.0932	0.0939979	ns	KW adj. p = ns
KITLG	1201	267.326	5	1.05e-55	4.01591e-55	****	KW adj. p < 0.0001
KLHL13	1201	286.013	5	1.02e-59	4.45022e-59	****	KW adj. p < 0.0001
KLHL3	1201	335.84	5	1.96e-70	1.39089e-69	****	KW adj. p < 0.0001
KMT5C	1201	126.652	5	1.22e-25	1.98503e-25	****	KW adj. p < 0.0001
KRT14	1201	414.959	5	1.77e-87	2.67315e-86	****	KW adj. p < 0.0001
L1TD1	1201	34.5559	5	1.85e-06	1.96333e-06	****	KW adj. p < 0.0001
LANCL1	1201	181.499	5	2.56e-37	5.75511e-37	****	KW adj. p < 0.0001
LARP6	1201	404.213	5	3.67e-85	4.80362e-84	****	KW adj. p < 0.0001
LDHC	1201	48.9037	5	2.32e-09	2.60282e-09	****	KW adj. p < 0.0001
LIMD2	1201	271.675	5	1.22e-56	4.85527e-56	****	KW adj. p < 0.0001
LIN7B	1201	36.4923	5	7.57e-07	8.13637e-07	****	KW adj. p < 0.0001
LINC00662	1201	78.4934	5	1.73e-15	2.20556e-15	****	KW adj. p < 0.0001
LINC00665	1201	240.846	5	5.06e-50	1.59376e-49	****	KW adj. p < 0.0001
LINC00683	1201	260.443	5	3.16e-54	1.14891e-53	****	KW adj. p < 0.0001
LINC00958	1201	227.398	5	3.86e-47	1.14248e-46	****	KW adj. p < 0.0001
LITAF	1201	55.8527	5	8.71e-11	1.0079e-10	****	KW adj. p < 0.0001
LMBR1L	1201	58.4061	5	2.59e-11	3.03886e-11	****	KW adj. p < 0.0001
LMCD1	1201	105.634	5	3.42e-21	4.94934e-21	****	KW adj. p < 0.0001
LNX1	1201	151.535	5	6.29e-31	1.19126e-30	****	KW adj. p < 0.0001
LRRC4	1201	40.4488	5	1.21e-07	1.3198e-07	****	KW adj. p < 0.0001
LRRK1	1201	242.238	5	2.54e-50	8.04333e-50	****	KW adj. p < 0.0001
LSG1	1201	225.462	5	1e-46	2.85922e-46	****	KW adj. p < 0.0001
LY6K	1201	165.506	5	6.63e-34	1.34658e-33	****	KW adj. p < 0.0001
LYN	1201	316.79	5	2.46e-66	1.40674e-65	****	KW adj. p < 0.0001
MAN1A1	1201	177.221	5	2.1e-36	4.56421e-36	****	KW adj. p < 0.0001
MAP1B	1201	201.446	5	1.39e-41	3.45447e-41	****	KW adj. p < 0.0001
MAP3K12	1201	373.66	5	1.41e-78	1.29764e-77	****	KW adj. p < 0.0001
MAPK12	1201	43.9735	5	2.35e-08	2.5872e-08	****	KW adj. p < 0.0001
2023-03-09	1201	237.201	5	3.06e-49	9.29041e-49	****	KW adj. p < 0.0001
MBNL3	1201	196.201	5	1.84e-40	4.47835e-40	****	KW adj. p < 0.0001
MED12L	1201	129.372	5	3.24e-26	5.31577e-26	****	KW adj. p < 0.0001
MED16	1201	164.918	5	8.85e-34	1.79129e-33	****	KW adj. p < 0.0001
MEST	1201	214.168	5	2.64e-44	7.19889e-44	****	KW adj. p < 0.0001
METAP1D	1201	113.7	5	6.77e-23	1.01983e-22	****	KW adj. p < 0.0001
MEX3A	1201	371.427	5	4.25e-78	3.7928e-77	****	KW adj. p < 0.0001
MFN2	1201	66.2246	5	6.24e-13	7.53148e-13	****	KW adj. p < 0.0001
MGAM2	1201	381.953	5	2.3e-80	2.33569e-79	****	KW adj. p < 0.0001
MIR4435-2HG	1201	178.893	5	9.22e-37	2.02634e-36	****	KW adj. p < 0.0001
MKRN2OS	1201	269.181	5	4.2e-56	1.6492e-55	****	KW adj. p < 0.0001
MLIP	1201	333.833	5	5.28e-70	3.57462e-69	****	KW adj. p < 0.0001
MLLT3	1201	97.9791	5	1.41e-19	1.97266e-19	****	KW adj. p < 0.0001
MMAA	1201	91.8816	5	2.7e-18	3.65586e-18	****	KW adj. p < 0.0001
MMD	1201	170.024	5	7.21e-35	1.5006e-34	****	KW adj. p < 0.0001
MMP25-AS1	1201	42.4619	5	4.75e-08	5.21968e-08	****	KW adj. p < 0.0001
MMP9	1201	212.979	5	4.74e-44	1.2717e-43	****	KW adj. p < 0.0001
MRPS24	1201	51.0826	5	8.32e-10	9.44216e-10	****	KW adj. p < 0.0001
MSX2	1201	324.132	5	6.47e-68	4.14221e-67	****	KW adj. p < 0.0001
MT1E	1201	121.746	5	1.34e-24	2.12167e-24	****	KW adj. p < 0.0001
MTDH	1201	185.85	5	3.01e-38	6.97988e-38	****	KW adj. p < 0.0001
MTRNR2L2	1201	2.43247	5	0.787	0.787	ns	KW adj. p = ns
MUC16	1201	272.173	5	9.55e-57	3.87928e-56	****	KW adj. p < 0.0001
MUC19	1201	175.572	5	4.72e-36	1.00728e-35	****	KW adj. p < 0.0001
MUC5B	1201	103.355	5	1.04e-20	1.49405e-20	****	KW adj. p < 0.0001
MYCL	1201	76.3135	5	4.95e-15	6.25655e-15	****	KW adj. p < 0.0001
MYH10	1201	151.386	5	6.77e-31	1.27805e-30	****	KW adj. p < 0.0001
NAALADL1	1201	377.06	5	2.6e-79	2.51049e-78	****	KW adj. p < 0.0001
NAGK	1201	146.259	5	8.35e-30	1.51795e-29	****	KW adj. p < 0.0001
NAGS	1201	253.546	5	9.53e-53	3.30186e-52	****	KW adj. p < 0.0001
NAMPT	1201	164.812	5	9.32e-34	1.87996e-33	****	KW adj. p < 0.0001
NARF	1201	306.85	5	3.37e-64	1.71115e-63	****	KW adj. p < 0.0001
NBL1	1201	124.393	5	3.68e-25	5.90605e-25	****	KW adj. p < 0.0001
NELFA	1201	61.3331	5	6.44e-12	7.60152e-12	****	KW adj. p < 0.0001
NEU1	1201	193.645	5	6.49e-40	1.55391e-39	****	KW adj. p < 0.0001
NICN1	1201	294	5	1.95e-61	8.97305e-61	****	KW adj. p < 0.0001
NINJ2	1201	73.8008	5	1.65e-14	2.06338e-14	****	KW adj. p < 0.0001
NLGN2	1201	108.316	5	9.3e-22	1.36601e-21	****	KW adj. p < 0.0001
NME7	1201	120.013	5	3.12e-24	4.88745e-24	****	KW adj. p < 0.0001
NOL4L	1201	157.09	5	4.13e-32	8.00188e-32	****	KW adj. p < 0.0001
NPIPA5	1201	18.6387	5	0.00224	0.00228263	**	KW adj. p < 0.01
NPY5R	1201	283.303	5	3.88e-59	1.65603e-58	****	KW adj. p < 0.0001
NR3C1	1201	320.026	5	4.94e-67	2.96904e-66	****	KW adj. p < 0.0001
NRG4	1201	84.2276	5	1.09e-16	1.42353e-16	****	KW adj. p < 0.0001
NRP2	1201	51.433	5	7.05e-10	8.01631e-10	****	KW adj. p < 0.0001
NTN1	1201	50.9204	5	8.98e-10	1.01716e-09	****	KW adj. p < 0.0001
NTN4	1201	389.81	5	4.66e-82	5.08285e-81	****	KW adj. p < 0.0001
OLFM4	1201	257.053	5	1.68e-53	5.92527e-53	****	KW adj. p < 0.0001
OPN3	1201	155.348	5	9.7e-32	1.84896e-31	****	KW adj. p < 0.0001
OPRK1	1201	393.922	5	6.06e-83	7.13868e-82	****	KW adj. p < 0.0001
OSBP2	1201	89.6144	5	8.1e-18	1.08677e-17	****	KW adj. p < 0.0001
OSGIN1	1201	89.6265	5	8.05e-18	1.08252e-17	****	KW adj. p < 0.0001
OSR1	1201	520.656	5	2.77e-110	1.63153e-108	****	KW adj. p < 0.0001
P2RX4	1201	367.051	5	3.73e-77	3.23084e-76	****	KW adj. p < 0.0001
P2RY1	1201	94.5953	5	7.26e-19	9.96769e-19	****	KW adj. p < 0.0001
PACS2	1201	16.0781	5	0.00662	0.00673434	**	KW adj. p < 0.01
PAEP	1201	35.8861	5	1e-06	1.06703e-06	****	KW adj. p < 0.0001
PAK6	1201	14.7103	5	0.0117	0.0118611	*	KW adj. p < 0.05
PAM16	1201	147.807	5	3.91e-30	7.19684e-30	****	KW adj. p < 0.0001
PAPLN	1201	215.048	5	1.71e-44	4.6846e-44	****	KW adj. p < 0.0001
PARP8	1201	112.715	5	1.09e-22	1.62947e-22	****	KW adj. p < 0.0001
PAX9	1201	305.802	5	5.67e-64	2.83019e-63	****	KW adj. p < 0.0001
PCGF3	1201	120.032	5	3.09e-24	4.85336e-24	****	KW adj. p < 0.0001
PDE12	1201	71.7435	5	4.44e-14	5.5056e-14	****	KW adj. p < 0.0001
PDE5A	1201	256.177	5	2.6e-53	9.11548e-53	****	KW adj. p < 0.0001
PDZD2	1201	322.607	5	1.38e-67	8.46688e-67	****	KW adj. p < 0.0001
PEG10	1201	44.5226	5	1.81e-08	2.00017e-08	****	KW adj. p < 0.0001
PFN2	1201	218.307	5	3.42e-45	9.63818e-45	****	KW adj. p < 0.0001
PFN4	1201	85.1006	5	7.17e-17	9.42663e-17	****	KW adj. p < 0.0001
PGBD5	1201	260.255	5	3.46e-54	1.25027e-53	****	KW adj. p < 0.0001
PGGHG	1201	82.2567	5	2.83e-16	3.65542e-16	****	KW adj. p < 0.0001
PHACTR3	1201	28.1099	5	3.46e-05	3.60697e-05	****	KW adj. p < 0.0001
PHC1	1201	69.2776	5	1.45e-13	1.77557e-13	****	KW adj. p < 0.0001
PHF11	1201	72.528	5	3.05e-14	3.78998e-14	****	KW adj. p < 0.0001
PHLPP1	1201	187.929	5	1.08e-38	2.54448e-38	****	KW adj. p < 0.0001
PHYKPL	1201	268.731	5	5.24e-56	2.04395e-55	****	KW adj. p < 0.0001
PIGP	1201	87.1204	5	2.7e-17	3.59796e-17	****	KW adj. p < 0.0001
PIK3C2B	1201	134.433	5	2.73e-27	4.70167e-27	****	KW adj. p < 0.0001
PIK3R5	1201	20.1769	5	0.00116	0.00118824	**	KW adj. p < 0.01
PISD	1201	216.143	5	9.95e-45	2.73857e-44	****	KW adj. p < 0.0001
PIWIL2	1201	292.608	5	3.89e-61	1.74902e-60	****	KW adj. p < 0.0001
PKD1L2	1201	194.851	5	3.59e-40	8.70169e-40	****	KW adj. p < 0.0001
PKIB	1201	377.576	5	2.01e-79	1.97315e-78	****	KW adj. p < 0.0001
PKM	1201	240.447	5	6.16e-50	1.9197e-49	****	KW adj. p < 0.0001
PLA2G3	1201	34.9035	5	1.57e-06	1.67221e-06	****	KW adj. p < 0.0001
PLAC8	1201	114.821	5	3.92e-23	5.93542e-23	****	KW adj. p < 0.0001
PLCD1	1201	250.19	5	5.01e-52	1.71563e-51	****	KW adj. p < 0.0001
PLCD3	1201	270.846	5	1.84e-56	7.27356e-56	****	KW adj. p < 0.0001
PLD5	1201	345.49	5	1.64e-72	1.271e-71	****	KW adj. p < 0.0001
PLEKHG2	1201	133.238	5	4.89e-27	8.32431e-27	****	KW adj. p < 0.0001
PLEKHO1	1201	189	5	6.39e-39	1.51153e-38	****	KW adj. p < 0.0001
PLIN2	1201	340.398	5	2.04e-71	1.50195e-70	****	KW adj. p < 0.0001
PLIN4	1201	370.308	5	7.41e-78	6.51416e-77	****	KW adj. p < 0.0001
PLPP4	1201	309.937	5	7.31e-65	3.87891e-64	****	KW adj. p < 0.0001
PLSCR1	1201	157.207	5	3.9e-32	7.60629e-32	****	KW adj. p < 0.0001
PNRC2	1201	165.846	5	5.61e-34	1.14732e-33	****	KW adj. p < 0.0001
POLI	1201	372.656	5	2.31e-78	2.09322e-77	****	KW adj. p < 0.0001
POLR1A	1201	132.824	5	5.99e-27	1.01552e-26	****	KW adj. p < 0.0001
POLR2A	1201	95.0501	5	5.83e-19	8.02306e-19	****	KW adj. p < 0.0001
POU2F3	1201	6.205	5	0.287	0.287978	ns	KW adj. p = ns
PPARGC1B	1201	384.092	5	7.95e-81	8.3617e-80	****	KW adj. p < 0.0001
PPFIA3	1201	135.748	5	1.43e-27	2.47726e-27	****	KW adj. p < 0.0001
PPTC7	1201	164.029	5	1.37e-33	2.75403e-33	****	KW adj. p < 0.0001
PRCD	1201	323.867	5	7.37e-68	4.66767e-67	****	KW adj. p < 0.0001
PRDM2	1201	139.647	5	2.13e-28	3.73384e-28	****	KW adj. p < 0.0001
PRKG2	1201	78.2221	5	1.98e-15	2.51883e-15	****	KW adj. p < 0.0001
PRMT2	1201	204.108	5	3.75e-42	9.47961e-42	****	KW adj. p < 0.0001
PROM1	1201	392.483	5	1.24e-82	1.43208e-81	****	KW adj. p < 0.0001
PRRG4	1201	101.932	5	2.07e-20	2.9593e-20	****	KW adj. p < 0.0001
PRRT3-AS1	1201	277.795	5	5.93e-58	2.47714e-57	****	KW adj. p < 0.0001
PSME1	1201	257.148	5	1.61e-53	5.71259e-53	****	KW adj. p < 0.0001
PSORS1C1	1201	70.6438	5	7.53e-14	9.25923e-14	****	KW adj. p < 0.0001
PTGFRN	1201	61.9538	5	4.79e-12	5.67668e-12	****	KW adj. p < 0.0001
PTOV1	1201	141.832	5	7.3e-29	1.2912e-28	****	KW adj. p < 0.0001
PXDNL	1201	47.7914	5	3.92e-09	4.38118e-09	****	KW adj. p < 0.0001
QPCT	1201	129.718	5	2.73e-26	4.49154e-26	****	KW adj. p < 0.0001
RAET1E	1201	19.9037	5	0.0013	0.00132934	**	KW adj. p < 0.01
RAPH1	1201	34.6559	5	1.76e-06	1.87119e-06	****	KW adj. p < 0.0001
RARB	1201	310.515	5	5.49e-65	2.93965e-64	****	KW adj. p < 0.0001
RARRES3	1201	244.64	5	7.76e-51	2.52522e-50	****	KW adj. p < 0.0001
RASA3	1201	175.7	5	4.43e-36	9.52288e-36	****	KW adj. p < 0.0001
RASGEF1C	1201	523.422	5	7.01e-111	5.16111e-109	****	KW adj. p < 0.0001
RASIP1	1201	337.315	5	9.41e-71	6.75913e-70	****	KW adj. p < 0.0001
RBBP8	1201	107.779	5	1.21e-21	1.77286e-21	****	KW adj. p < 0.0001
RBCK1	1201	130.892	5	1.54e-26	2.56232e-26	****	KW adj. p < 0.0001
RBP7	1201	331.814	5	1.44e-69	9.63818e-69	****	KW adj. p < 0.0001
RDH10	1201	295.73	5	8.29e-62	3.84473e-61	****	KW adj. p < 0.0001
RGS10	1201	185.542	5	3.5e-38	8.08431e-38	****	KW adj. p < 0.0001
RGS12	1201	204.055	5	3.85e-42	9.69081e-42	****	KW adj. p < 0.0001
RHOBTB1	1201	57.8865	5	3.32e-11	3.88763e-11	****	KW adj. p < 0.0001
RHOBTB3	1201	97.1656	5	2.09e-19	2.91019e-19	****	KW adj. p < 0.0001
RHOXF1-AS1	1201	374.678	5	8.48e-79	7.92813e-78	****	KW adj. p < 0.0001
RHPN2	1201	9.44313	5	0.0926	0.093553	ns	KW adj. p = ns
RIN1	1201	60.506	5	9.55e-12	1.12274e-11	****	KW adj. p < 0.0001
RNF130	1201	156.105	5	6.69e-32	1.28352e-31	****	KW adj. p < 0.0001
RNF17	1201	35.9656	5	9.65e-07	1.03155e-06	****	KW adj. p < 0.0001
RNF44	1201	62.4225	5	3.83e-12	4.54812e-12	****	KW adj. p < 0.0001
ROBO3	1201	383.293	5	1.18e-80	1.21933e-79	****	KW adj. p < 0.0001
ROBO4	1201	389.955	5	4.34e-82	4.82313e-81	****	KW adj. p < 0.0001
RP11-115C21.2	1201	106.708	5	2.03e-21	2.95958e-21	****	KW adj. p < 0.0001
RP11-326C3.2	1201	56.3688	5	6.82e-11	7.92304e-11	****	KW adj. p < 0.0001
RP11-351J23.1	1201	466.658	5	1.25e-98	3.68125e-97	****	KW adj. p < 0.0001
RP11-359B12.2	1201	227.984	5	2.89e-47	8.59702e-47	****	KW adj. p < 0.0001
RP11-439E19.10	1201	266.624	5	1.49e-55	5.58987e-55	****	KW adj. p < 0.0001
RP11-44F14.2	1201	77.0944	5	3.4e-15	4.31595e-15	****	KW adj. p < 0.0001
RP11-44F14.8	1201	99.9635	5	5.38e-20	7.59909e-20	****	KW adj. p < 0.0001
RP11-465L10.10	1201	240.484	5	6.05e-50	1.89545e-49	****	KW adj. p < 0.0001
RP11-466A19.1	1201	49.6294	5	1.65e-09	1.85822e-09	****	KW adj. p < 0.0001
RP11-469H8.6	1201	242.58	5	2.15e-50	6.88234e-50	****	KW adj. p < 0.0001
RP11-519G16.3	1201	149.232	5	1.95e-30	3.64619e-30	****	KW adj. p < 0.0001
RP11-597D13.9	1201	496.15	5	5.41e-105	2.27606e-103	****	KW adj. p < 0.0001
RP11-69I8.3	1201	216.162	5	9.86e-45	2.72654e-44	****	KW adj. p < 0.0001
RP11-79N23.1	1201	34.5022	5	1.89e-06	2.00218e-06	****	KW adj. p < 0.0001
RP11-802E16.3	1201	29.0534	5	2.26e-05	2.36018e-05	****	KW adj. p < 0.0001
RP11-834C11.4	1201	311.414	5	3.52e-65	1.90209e-64	****	KW adj. p < 0.0001
RP11-879F14.2	1201	74.9684	5	9.45e-15	1.18679e-14	****	KW adj. p < 0.0001
RP3-325F22.5	1201	98.2864	5	1.21e-19	1.69688e-19	****	KW adj. p < 0.0001
RP3-333H23.8	1201	24.5584	5	0.00017	0.000175667	***	KW adj. p < 0.001
RP3-340N1.2	1201	50.238	5	1.24e-09	1.39916e-09	****	KW adj. p < 0.0001
RP5-1028K7.2	1201	148.114	5	3.37e-30	6.26161e-30	****	KW adj. p < 0.0001
RP9	1201	173.099	5	1.59e-35	3.34468e-35	****	KW adj. p < 0.0001
RPL18A	1201	97.8431	5	1.5e-19	2.0936e-19	****	KW adj. p < 0.0001
RTP4	1201	82.8464	5	2.13e-16	2.76337e-16	****	KW adj. p < 0.0001
RXRA	1201	184.174	5	6.87e-38	1.58064e-37	****	KW adj. p < 0.0001
S100B	1201	541.419	5	9.12e-115	8.9528e-113	****	KW adj. p < 0.0001
SACM1L	1201	160.914	5	6.32e-33	1.25336e-32	****	KW adj. p < 0.0001
SARM1	1201	147.998	5	3.56e-30	6.59384e-30	****	KW adj. p < 0.0001
SATB1	1201	267.153	5	1.14e-55	4.332e-55	****	KW adj. p < 0.0001
SBDS	1201	224.893	5	1.33e-46	3.7844e-46	****	KW adj. p < 0.0001
SCFD2	1201	16.0534	5	0.00669	0.00679381	**	KW adj. p < 0.01
SCNN1A	1201	399.352	5	4.09e-84	5.12555e-83	****	KW adj. p < 0.0001
SCNN1B	1201	106.336	5	2.43e-21	3.5253e-21	****	KW adj. p < 0.0001
SCNN1G	1201	83.4283	5	1.61e-16	2.09799e-16	****	KW adj. p < 0.0001
SDCBP2	1201	106.829	5	1.92e-21	2.80615e-21	****	KW adj. p < 0.0001
2023-09-06	1201	63.279	5	2.55e-12	3.03424e-12	****	KW adj. p < 0.0001
SERPINB9	1201	91.1283	5	3.89e-18	5.24304e-18	****	KW adj. p < 0.0001
SERPINE1	1201	98.9621	5	8.75e-20	1.23295e-19	****	KW adj. p < 0.0001
SFN	1201	110.249	5	3.63e-22	5.38557e-22	****	KW adj. p < 0.0001
SFXN5	1201	303.03	5	2.23e-63	1.08551e-62	****	KW adj. p < 0.0001
SGCE	1201	250.573	5	4.14e-52	1.426e-51	****	KW adj. p < 0.0001
SGK1	1201	282.328	5	6.29e-59	2.66533e-58	****	KW adj. p < 0.0001
SGPP2	1201	81.1014	5	4.94e-16	6.36687e-16	****	KW adj. p < 0.0001
SGSM2	1201	156.517	5	5.47e-32	1.05634e-31	****	KW adj. p < 0.0001
SH2B2	1201	271.773	5	1.16e-56	4.64789e-56	****	KW adj. p < 0.0001
SH3BP1	1201	323.169	5	1.04e-67	6.5166e-67	****	KW adj. p < 0.0001
SH3RF2	1201	301.869	5	3.97e-63	1.90108e-62	****	KW adj. p < 0.0001
SH3TC1	1201	101.353	5	2.74e-20	3.89821e-20	****	KW adj. p < 0.0001
SHC1	1201	61.4488	5	6.1e-12	7.21466e-12	****	KW adj. p < 0.0001
SHISA9	1201	125.692	5	1.95e-25	3.16405e-25	****	KW adj. p < 0.0001
SIN3B	1201	86.4088	5	3.81e-17	5.0429e-17	****	KW adj. p < 0.0001
SLC16A1	1201	293.724	5	2.24e-61	1.02276e-60	****	KW adj. p < 0.0001
SLC16A7	1201	309.727	5	8.11e-65	4.26499e-64	****	KW adj. p < 0.0001
SLC22A18AS	1201	44.0116	5	2.3e-08	2.53689e-08	****	KW adj. p < 0.0001
SLC25A12	1201	176.199	5	3.47e-36	7.48656e-36	****	KW adj. p < 0.0001
SLC25A37	1201	447.655	5	1.57e-94	3.85304e-93	****	KW adj. p < 0.0001
SLC35E4	1201	93.7298	5	1.1e-18	1.50325e-18	****	KW adj. p < 0.0001
SLC35G1	1201	347.964	5	4.8e-73	3.7696e-72	****	KW adj. p < 0.0001
SLC35G2	1201	312.282	5	2.29e-65	1.26057e-64	****	KW adj. p < 0.0001
SLC6A9	1201	232.376	5	3.31e-48	9.8964e-48	****	KW adj. p < 0.0001
SLK	1201	146.513	5	7.37e-30	1.34394e-29	****	KW adj. p < 0.0001
SMAGP	1201	175.583	5	4.69e-36	1.00451e-35	****	KW adj. p < 0.0001
SMARCA1	1201	92.7898	5	1.74e-18	2.36143e-18	****	KW adj. p < 0.0001
SMIM8	1201	268.593	5	5.61e-56	2.17388e-55	****	KW adj. p < 0.0001
SORD	1201	402.997	5	6.7e-85	8.57891e-84	****	KW adj. p < 0.0001
SOX11	1201	397.228	5	1.17e-83	1.43569e-82	****	KW adj. p < 0.0001
SOX15	1201	134.38	5	2.8e-27	4.80816e-27	****	KW adj. p < 0.0001
SOX4	1201	146.559	5	7.21e-30	1.31885e-29	****	KW adj. p < 0.0001
SP3	1201	23.7053	5	0.000247	0.000254786	***	KW adj. p < 0.001
SPATA22	1201	136.214	5	1.14e-27	1.98657e-27	****	KW adj. p < 0.0001
SPECC1	1201	29.9757	5	1.49e-05	1.56437e-05	****	KW adj. p < 0.0001
SPRTN	1201	144.091	5	2.41e-29	4.32771e-29	****	KW adj. p < 0.0001
SSBP3	1201	85.2098	5	6.8e-17	8.96018e-17	****	KW adj. p < 0.0001
STAC2	1201	429.315	5	1.42e-90	2.698e-89	****	KW adj. p < 0.0001
STC1	1201	54.9343	5	1.35e-10	1.55607e-10	****	KW adj. p < 0.0001
STK3	1201	101.51	5	2.54e-20	3.62242e-20	****	KW adj. p < 0.0001
STXBP5-AS1	1201	175.393	5	5.15e-36	1.09507e-35	****	KW adj. p < 0.0001
SYNJ2	1201	65.1892	5	1.02e-12	1.22358e-12	****	KW adj. p < 0.0001
SYT6	1201	183.438	5	9.86e-38	2.25098e-37	****	KW adj. p < 0.0001
SYTL3	1201	112.421	5	1.26e-22	1.87884e-22	****	KW adj. p < 0.0001
TAGAP	1201	103.87	5	8.07e-21	1.16216e-20	****	KW adj. p < 0.0001
TBL1X	1201	33.2005	5	3.43e-06	3.62056e-06	****	KW adj. p < 0.0001
TBP	1201	42.2324	5	5.29e-08	5.80225e-08	****	KW adj. p < 0.0001
TBX19	1201	442.226	5	2.33e-93	5.48948e-92	****	KW adj. p < 0.0001
TCIRG1	1201	116.776	5	1.51e-23	2.32825e-23	****	KW adj. p < 0.0001
TDRD12	1201	29.4788	5	1.87e-05	1.95984e-05	****	KW adj. p < 0.0001
TEAD2	1201	144.871	5	1.65e-29	2.97202e-29	****	KW adj. p < 0.0001
TF	1201	419.13	5	2.23e-88	3.54992e-87	****	KW adj. p < 0.0001
TFPI	1201	308.709	5	1.34e-64	6.9846e-64	****	KW adj. p < 0.0001
TGFBI	1201	53.9316	5	2.16e-10	2.46558e-10	****	KW adj. p < 0.0001
TGIF1	1201	93.2156	5	1.42e-18	1.93159e-18	****	KW adj. p < 0.0001
TGIF2	1201	169.328	5	1.02e-34	2.108e-34	****	KW adj. p < 0.0001
TGM1	1201	322.747	5	1.28e-67	7.936e-67	****	KW adj. p < 0.0001
THBS3	1201	66.5546	5	5.33e-13	6.44634e-13	****	KW adj. p < 0.0001
THEMIS2	1201	177.163	5	2.16e-36	4.67735e-36	****	KW adj. p < 0.0001
THSD1	1201	499.491	5	1.03e-105	5.05558e-104	****	KW adj. p < 0.0001
TIA1	1201	46.1209	5	8.58e-09	9.51718e-09	****	KW adj. p < 0.0001
TIMP3	1201	145.55	5	1.18e-29	2.13852e-29	****	KW adj. p < 0.0001
TIMP4	1201	384.391	5	6.85e-81	7.33573e-80	****	KW adj. p < 0.0001
TLR1	1201	147.687	5	4.15e-30	7.6148e-30	****	KW adj. p < 0.0001
TLR6	1201	131.435	5	1.18e-26	1.97449e-26	****	KW adj. p < 0.0001
TM4SF18	1201	208.305	5	4.75e-43	1.22172e-42	****	KW adj. p < 0.0001
TM6SF1	1201	131.198	5	1.33e-26	2.21918e-26	****	KW adj. p < 0.0001
TMEM132A	1201	316.784	5	2.46e-66	1.40674e-65	****	KW adj. p < 0.0001
TMEM144	1201	412.405	5	6.29e-87	9.03612e-86	****	KW adj. p < 0.0001
TMEM246	1201	421.227	5	7.88e-89	1.40646e-87	****	KW adj. p < 0.0001
TMEM25	1201	477.268	5	6.43e-101	1.9933e-99	****	KW adj. p < 0.0001
TMEM45B	1201	374.931	5	7.48e-79	7.106e-78	****	KW adj. p < 0.0001
TMEM5	1201	119.631	5	3.76e-24	5.87438e-24	****	KW adj. p < 0.0001
TMEM63C	1201	510.747	5	3.82e-108	2.04544e-106	****	KW adj. p < 0.0001
TMLHE	1201	130.013	5	2.37e-26	3.92115e-26	****	KW adj. p < 0.0001
TMPRSS11F	1201	29.3479	5	1.98e-05	2.07144e-05	****	KW adj. p < 0.0001
TMPRSS2	1201	147.88	5	3.77e-30	6.96091e-30	****	KW adj. p < 0.0001
TMSB4X	1201	39.6141	5	1.79e-07	1.94882e-07	****	KW adj. p < 0.0001
TMTC1	1201	317.387	5	1.83e-66	1.0672e-65	****	KW adj. p < 0.0001
TMX4	1201	159.082	5	1.55e-32	3.05334e-32	****	KW adj. p < 0.0001
TNFAIP8L2	1201	46.1052	5	8.65e-09	9.57679e-09	****	KW adj. p < 0.0001
TNFSF14	1201	84.8883	5	7.94e-17	1.04157e-16	****	KW adj. p < 0.0001
TNNI2	1201	237.771	5	2.31e-49	7.04969e-49	****	KW adj. p < 0.0001
TOX3	1201	340.675	5	1.78e-71	1.32711e-70	****	KW adj. p < 0.0001
TPM2	1201	214.132	5	2.68e-44	7.27429e-44	****	KW adj. p < 0.0001
TPPP	1201	267.689	5	8.77e-56	3.37616e-55	****	KW adj. p < 0.0001
TPT1-AS1	1201	407.845	5	6.05e-86	8.28709e-85	****	KW adj. p < 0.0001
TRANK1	1201	65.4019	5	9.25e-13	1.11189e-12	****	KW adj. p < 0.0001
TRIM26	1201	123.532	5	5.6e-25	8.93875e-25	****	KW adj. p < 0.0001
TRIM29	1201	521.498	5	1.83e-110	1.19763e-108	****	KW adj. p < 0.0001
TRIM65	1201	315.406	5	4.87e-66	2.75811e-65	****	KW adj. p < 0.0001
TRIT1	1201	213.094	5	4.48e-44	1.21042e-43	****	KW adj. p < 0.0001
TRMT6	1201	212.24	5	6.82e-44	1.80134e-43	****	KW adj. p < 0.0001
TSHZ2	1201	424.094	5	1.9e-89	3.49719e-88	****	KW adj. p < 0.0001
TSHZ3	1201	212.975	5	4.75e-44	1.2717e-43	****	KW adj. p < 0.0001
TSPAN3	1201	121.505	5	1.51e-24	2.38442e-24	****	KW adj. p < 0.0001
TSPAN5	1201	74.9326	5	9.61e-15	1.20432e-14	****	KW adj. p < 0.0001
TSPAN9	1201	207.031	5	8.89e-43	2.27661e-42	****	KW adj. p < 0.0001
TSTD2	1201	106.343	5	2.43e-21	3.5253e-21	****	KW adj. p < 0.0001
TTLL7	1201	117.584	5	1.02e-23	1.581e-23	****	KW adj. p < 0.0001
TUBA1A	1201	48.8084	5	2.43e-09	2.72105e-09	****	KW adj. p < 0.0001
TWIST2	1201	307.559	5	2.37e-64	1.2245e-63	****	KW adj. p < 0.0001
TWISTNB	1201	37.3182	5	5.17e-07	5.58739e-07	****	KW adj. p < 0.0001
TYMP	1201	197.316	5	1.07e-40	2.61506e-40	****	KW adj. p < 0.0001
TYW3	1201	187.386	5	1.41e-38	3.28257e-38	****	KW adj. p < 0.0001
UBTF	1201	225.673	5	9.05e-47	2.60022e-46	****	KW adj. p < 0.0001
ULK4	1201	318.676	5	9.64e-67	5.67796e-66	****	KW adj. p < 0.0001
UMAD1	1201	298.002	5	2.69e-62	1.25747e-61	****	KW adj. p < 0.0001
UPK2	1201	180.099	5	5.1e-37	1.13355e-36	****	KW adj. p < 0.0001
USP2	1201	169.944	5	7.5e-35	1.55546e-34	****	KW adj. p < 0.0001
VAMP8	1201	174.299	5	8.82e-36	1.8687e-35	****	KW adj. p < 0.0001
VEZF1	1201	243.717	5	1.22e-50	3.94824e-50	****	KW adj. p < 0.0001
VPS36	1201	218.048	5	3.89e-45	1.08588e-44	****	KW adj. p < 0.0001
VTCN1	1201	134.765	5	2.32e-27	4.00727e-27	****	KW adj. p < 0.0001
WDR33	1201	36.5713	5	7.3e-07	7.86051e-07	****	KW adj. p < 0.0001
WISP3	1201	238.088	5	1.97e-49	6.04339e-49	****	KW adj. p < 0.0001
XK	1201	212.846	5	5.06e-44	1.34857e-43	****	KW adj. p < 0.0001
ZBTB5	1201	115.384	5	2.98e-23	4.53545e-23	****	KW adj. p < 0.0001
ZNF208	1201	183.548	5	9.34e-38	2.14057e-37	****	KW adj. p < 0.0001
ZNF250	1201	70.6871	5	7.37e-14	9.08144e-14	****	KW adj. p < 0.0001
ZNF285	1201	32.1274	5	5.61e-06	5.90052e-06	****	KW adj. p < 0.0001
ZNF320	1201	82.836	5	2.14e-16	2.77024e-16	****	KW adj. p < 0.0001
ZNF358	1201	123.07	5	7.02e-25	1.11751e-24	****	KW adj. p < 0.0001
ZNF438	1201	244.692	5	7.57e-51	2.47707e-50	****	KW adj. p < 0.0001
ZNF443	1201	129.811	5	2.61e-26	4.30613e-26	****	KW adj. p < 0.0001
ZNF503	1201	136.969	5	7.88e-28	1.37725e-27	****	KW adj. p < 0.0001
ZNF503-AS2	1201	123.971	5	4.52e-25	7.23446e-25	****	KW adj. p < 0.0001
ZNF513	1201	64.1521	5	1.68e-12	2.00308e-12	****	KW adj. p < 0.0001
ZNF518B	1201	118.491	5	6.55e-24	1.02062e-23	****	KW adj. p < 0.0001
ZNF521	1201	359.124	5	1.9e-75	1.62188e-74	****	KW adj. p < 0.0001
ZNF558	1201	36.0444	5	9.31e-07	9.97016e-07	****	KW adj. p < 0.0001
ZNF569	1201	12.0337	5	0.0343	0.0347125	*	KW adj. p < 0.05
ZNF613	1201	133.857	5	3.61e-27	6.18108e-27	****	KW adj. p < 0.0001
ZNF641	1201	86.4528	5	3.73e-17	4.94813e-17	****	KW adj. p < 0.0001
ZNF687	1201	226.437	5	6.21e-47	1.81975e-46	****	KW adj. p < 0.0001
ZNF730	1201	85.5359	5	5.81e-17	7.67285e-17	****	KW adj. p < 0.0001
ZNF775	1201	36.4064	5	7.88e-07	8.45413e-07	****	KW adj. p < 0.0001
ZNF827	1201	70.8912	5	6.69e-14	8.27817e-14	****	KW adj. p < 0.0001
ZNF839	1201	180.362	5	4.48e-37	9.99515e-37	****	KW adj. p < 0.0001
ZNF860	1201	113.94	5	6.02e-23	9.09174e-23	****	KW adj. p < 0.0001
ZNRF3	1201	27.3171	5	4.95e-05	5.14206e-05	****	KW adj. p < 0.0001
ZSCAN2	1201	21.7723	5	0.000578	0.000593105	***	KW adj. p < 0.001
ZSWIM4	1201	287.932	5	3.93e-60	1.72744e-59	****	KW adj. p < 0.0001
ZSWIM8	1201	55.9191	5	8.44e-11	9.78575e-11	****	KW adj. p < 0.0001

## Sheet: B TCGA Post hoc Wilcoxon Test
GeneSYM	group1	group2	n1	n2	statistic	p	p.adj	p.adj.multi	p.adj.multi.signif
AACS	PAM50 Her2	PAM50 Basal	82	194	10584	1.43e-05	7.15e-05	3.27404e-05	****
AACS	PAM50 LumB	PAM50 Her2	207	82	7463	0.11	0.165	0.142457	ns
AACS	PAM50 LumB	PAM50 Basal	207	194	25210	9.72e-06	7.15e-05	2.2719e-05	****
AACS	PAM50 LumA	PAM50 LumB	566	207	54081	0.102	0.165	0.132944	ns
AACS	PAM50 LumA	PAM50 Her2	566	82	19150	0.011	0.032	0.0169935	*
AACS	PAM50 LumA	PAM50 Basal	566	194	65999	2.61e-05	9.79e-05	5.78895e-05	****
AACS	PAM50 Normal	PAM50 LumA	40	566	10517	0.453	0.485	0.506038	ns
AACS	PAM50 Normal	PAM50 LumB	40	207	3549	0.153	0.209	0.192324	ns
AACS	PAM50 Normal	PAM50 Her2	40	82	1276	0.047	0.099	0.0654089	ns
AACS	PAM50 Normal	PAM50 Basal	40	194	4352	0.226	0.283	0.273569	ns
AACS	Normal	PAM50 Normal	112	40	2703	0.053	0.099	0.073141	ns
AACS	Normal	PAM50 LumA	112	566	36398	0.013	0.032	0.0198791	*
AACS	Normal	PAM50 LumB	112	207	12435	0.284	0.328	0.33586	ns
AACS	Normal	PAM50 Her2	112	82	4399	0.618	0.618	0.663201	ns
AACS	Normal	PAM50 Basal	112	194	14260	5.26e-06	7.15e-05	1.26396e-05	****
ABCA10	PAM50 Her2	PAM50 Basal	82	194	6556	0.021	0.024	0.0309941	*
ABCA10	PAM50 LumB	PAM50 Her2	207	82	9228	0.248	0.248	0.297477	ns
ABCA10	PAM50 LumB	PAM50 Basal	207	194	18163	0.099	0.106	0.129304	ns
ABCA10	PAM50 LumA	PAM50 LumB	566	207	88935	2.4e-28	7.2e-28	3.32044e-27	****
ABCA10	PAM50 LumA	PAM50 Her2	566	82	36698	1.66e-17	3.11e-17	1.09703e-16	****
ABCA10	PAM50 LumA	PAM50 Basal	566	194	77628	7.18e-18	1.71e-17	4.86279e-17	****
ABCA10	PAM50 Normal	PAM50 LumA	40	566	16375	2.32e-06	2.9e-06	5.80832e-06	****
ABCA10	PAM50 Normal	PAM50 LumB	40	207	7698	7.98e-18	1.71e-17	5.37957e-17	****
ABCA10	PAM50 Normal	PAM50 Her2	40	82	3116	8.48e-16	1.27e-15	5.03951e-15	****
ABCA10	PAM50 Normal	PAM50 Basal	40	194	6904	8.77e-15	1.2e-14	4.82737e-14	****
ABCA10	Normal	PAM50 Normal	112	40	4172	6.39e-16	1.07e-15	3.82874e-15	****
ABCA10	Normal	PAM50 LumA	112	566	61751	1.04e-56	1.56e-55	2.06345e-54	****
ABCA10	Normal	PAM50 LumB	112	207	23138	8.2e-49	6.15e-48	6.62833e-47	****
ABCA10	Normal	PAM50 Her2	112	82	9176	1.81e-32	6.79e-32	3.54289e-31	****
ABCA10	Normal	PAM50 Basal	112	194	21576	8.35e-47	4.18e-46	5.43996e-45	****
ABCC2	PAM50 Her2	PAM50 Basal	82	194	12024	1.87e-11	5.61e-11	7.82228e-11	****
ABCC2	PAM50 LumB	PAM50 Her2	207	82	3051	2.13e-17	7.99e-17	1.39706e-16	****
ABCC2	PAM50 LumB	PAM50 Basal	207	194	16456	0.002	0.002	0.00342622	**
ABCC2	PAM50 LumA	PAM50 LumB	566	207	60793	0.421	0.421	0.47491	ns
ABCC2	PAM50 LumA	PAM50 Her2	566	82	8415	1.01e-20	7.58e-20	8.39743e-20	****
ABCC2	PAM50 LumA	PAM50 Basal	566	194	46631.5	0.002	0.002	0.00342622	**
ABCC2	PAM50 Normal	PAM50 LumA	40	566	14718	0.002	0.002	0.00342622	**
ABCC2	PAM50 Normal	PAM50 LumB	40	207	5477	0.001	0.002	0.00177475	**
ABCC2	PAM50 Normal	PAM50 Her2	40	82	850	1.66e-05	3.11e-05	3.76606e-05	****
ABCC2	PAM50 Normal	PAM50 Basal	40	194	4366	0.213	0.228	0.25956	ns
ABCC2	Normal	PAM50 Normal	112	40	3009	0.001	0.002	0.00177475	**
ABCC2	Normal	PAM50 LumA	112	566	50513	2.93e-23	4.4e-22	2.92665e-22	****
ABCC2	Normal	PAM50 LumB	112	207	18282	1.77e-17	7.99e-17	1.1662e-16	****
ABCC2	Normal	PAM50 Her2	112	82	2872	8.55e-06	1.83e-05	2.01027e-05	****
ABCC2	Normal	PAM50 Basal	112	194	14992	3.09e-08	7.72e-08	9.44197e-08	****
ABLIM3	PAM50 Her2	PAM50 Basal	82	194	12463	1.01e-13	1.89e-13	5.09376e-13	****
ABLIM3	PAM50 LumB	PAM50 Her2	207	82	10023	0.016	0.018	0.0240869	*
ABLIM3	PAM50 LumB	PAM50 Basal	207	194	34308	1.36e-34	6.8e-34	3.11622e-33	****
ABLIM3	PAM50 LumA	PAM50 LumB	566	207	75113	1.81e-09	2.47e-09	6.31547e-09	****
ABLIM3	PAM50 LumA	PAM50 Her2	566	82	34029	8.44e-12	1.27e-11	3.64398e-11	****
ABLIM3	PAM50 LumA	PAM50 Basal	566	194	103530	7.88e-76	1.18e-74	6.25385e-73	****
ABLIM3	PAM50 Normal	PAM50 LumA	40	566	8765	0.017	0.018	0.0255	*
ABLIM3	PAM50 Normal	PAM50 LumB	40	207	4639	0.228	0.228	0.275875	ns
ABLIM3	PAM50 Normal	PAM50 Her2	40	82	2169	0.004	0.005	0.00659615	**
ABLIM3	PAM50 Normal	PAM50 Basal	40	194	7125	8.59e-17	1.84e-16	5.45387e-16	****
ABLIM3	Normal	PAM50 Normal	112	40	4005	1.55e-13	2.58e-13	7.72787e-13	****
ABLIM3	Normal	PAM50 LumA	112	566	50475	3.58e-23	1.07e-22	3.53146e-22	****
ABLIM3	Normal	PAM50 LumB	112	207	19894	4.67e-26	1.75e-25	5.63888e-25	****
ABLIM3	Normal	PAM50 Her2	112	82	8413	4.62e-23	1.16e-22	4.50644e-22	****
ABLIM3	Normal	PAM50 Basal	112	194	21664	1.51e-47	1.13e-46	1.10776e-45	****
ABRACL	PAM50 Her2	PAM50 Basal	82	194	6957	0.1	0.115	0.130513	ns
ABRACL	PAM50 LumB	PAM50 Her2	207	82	4110	8.3e-12	1.56e-11	3.59063e-11	****
ABRACL	PAM50 LumB	PAM50 Basal	207	194	7978	1.76e-25	6.6e-25	2.04864e-24	****
ABRACL	PAM50 LumA	PAM50 LumB	566	207	47690	7.44e-05	9.3e-05	0.000156208	***
ABRACL	PAM50 LumA	PAM50 Her2	566	82	7392	1.84e-23	5.52e-23	1.85917e-22	****
ABRACL	PAM50 LumA	PAM50 Basal	566	194	13714	6.4e-55	9.6e-54	9.80211e-53	****
ABRACL	PAM50 Normal	PAM50 LumA	40	566	12540	0.254	0.272	0.303839	ns
ABRACL	PAM50 Normal	PAM50 LumB	40	207	3899	0.561	0.561	0.610132	ns
ABRACL	PAM50 Normal	PAM50 Her2	40	82	739	9.05e-07	1.23e-06	2.36263e-06	****
ABRACL	PAM50 Normal	PAM50 Basal	40	194	1445	4.24e-10	7.07e-10	1.56977e-09	****
ABRACL	Normal	PAM50 Normal	112	40	821	2.93e-09	4.4e-09	9.99566e-09	****
ABRACL	Normal	PAM50 LumA	112	566	13085	8.66e-23	2.16e-22	8.28059e-22	****
ABRACL	Normal	PAM50 LumB	112	207	3995	4.4e-22	9.43e-22	4.0222e-21	****
ABRACL	Normal	PAM50 Her2	112	82	378	1.07e-27	5.35e-27	1.43049e-26	****
ABRACL	Normal	PAM50 Basal	112	194	747	6.13e-42	4.6e-41	2.37844e-40	****
AC005083.1	PAM50 Her2	PAM50 Basal	82	194	9923	0.001	0.003	0.00177475	**
AC005083.1	PAM50 LumB	PAM50 Her2	207	82	5739	1.79e-05	0.000134	4.04522e-05	****
AC005083.1	PAM50 LumB	PAM50 Basal	207	194	18670	0.225	0.338	0.272661	ns
AC005083.1	PAM50 LumA	PAM50 LumB	566	207	73128	1.21e-07	1.82e-06	3.46338e-07	****
AC005083.1	PAM50 LumA	PAM50 Her2	566	82	20629	0.104	0.223	0.135268	ns
AC005083.1	PAM50 LumA	PAM50 Basal	566	194	64227	0.00041	0.002	0.000782361	***
AC005083.1	PAM50 Normal	PAM50 LumA	40	566	10391	0.386	0.483	0.440149	ns
AC005083.1	PAM50 Normal	PAM50 LumB	40	207	4749	0.141	0.235	0.178603	ns
AC005083.1	PAM50 Normal	PAM50 Her2	40	82	1368	0.139	0.235	0.1763	ns
AC005083.1	PAM50 Normal	PAM50 Basal	40	194	4173	0.453	0.523	0.506038	ns
AC005083.1	Normal	PAM50 Normal	112	40	2370	0.588	0.588	0.635538	ns
AC005083.1	Normal	PAM50 LumA	112	566	32804	0.559	0.588	0.608184	ns
AC005083.1	Normal	PAM50 LumB	112	207	14270	0.000661	0.002	0.00122543	**
AC005083.1	Normal	PAM50 Her2	112	82	4229	0.348	0.475	0.402283	ns
AC005083.1	Normal	PAM50 Basal	112	194	12567	0.022	0.056	0.0323715	*
AC011747.4	PAM50 Her2	PAM50 Basal	82	194	10892	1.25e-06	2.68e-06	3.21903e-06	****
AC011747.4	PAM50 LumB	PAM50 Her2	207	82	10531	0.001	0.002	0.00177475	**
AC011747.4	PAM50 LumB	PAM50 Basal	207	194	30383	6.48e-19	4.86e-18	4.72207e-18	****
AC011747.4	PAM50 LumA	PAM50 LumB	566	207	51188.5	0.007	0.01	0.0111332	*
AC011747.4	PAM50 LumA	PAM50 Her2	566	82	26144	0.064	0.08	0.0867712	ns
AC011747.4	PAM50 LumA	PAM50 Basal	566	194	80599	2.08e-22	3.12e-21	1.94833e-21	****
AC011747.4	PAM50 Normal	PAM50 LumA	40	566	5124	7.06e-09	2.12e-08	2.31793e-08	****
AC011747.4	PAM50 Normal	PAM50 LumB	40	207	1758	8.56e-09	2.14e-08	2.78527e-08	****
AC011747.4	PAM50 Normal	PAM50 Her2	40	82	897	5.13e-05	9.62e-05	0.000110226	***
AC011747.4	PAM50 Normal	PAM50 Basal	40	194	3894	0.972	0.972	0.976362	ns
AC011747.4	Normal	PAM50 Normal	112	40	2509	0.261	0.28	0.311615	ns
AC011747.4	Normal	PAM50 LumA	112	566	17936.5	3.74e-13	1.87e-12	1.7999e-12	****
AC011747.4	Normal	PAM50 LumB	112	207	5914.5	5.2e-13	1.95e-12	2.4766e-12	****
AC011747.4	Normal	PAM50 Her2	112	82	3122	0.000142	0.000237	0.000287958	***
AC011747.4	Normal	PAM50 Basal	112	194	11945	0.147	0.17	0.185584	ns
AC093627.10	PAM50 Her2	PAM50 Basal	82	194	3241	7.45e-15	2.79e-14	4.12681e-14	****
AC093627.10	PAM50 LumB	PAM50 Her2	207	82	7268.5	0.057	0.066	0.0781423	ns
AC093627.10	PAM50 LumB	PAM50 Basal	207	194	6191	4.9e-33	7.35e-32	9.90208e-32	****
AC093627.10	PAM50 LumA	PAM50 LumB	566	207	74014	1.98e-08	4.24e-08	6.16895e-08	****
AC093627.10	PAM50 LumA	PAM50 Her2	566	82	25509	0.146	0.156	0.184401	ns
AC093627.10	PAM50 LumA	PAM50 Basal	566	194	23698	2.91e-32	2.18e-31	5.60801e-31	****
AC093627.10	PAM50 Normal	PAM50 LumA	40	566	15979	1.34e-05	2.01e-05	3.07685e-05	****
AC093627.10	PAM50 Normal	PAM50 LumB	40	207	6600	2.75e-09	6.88e-09	9.41102e-09	****
AC093627.10	PAM50 Normal	PAM50 Her2	40	82	2366	7.6e-05	0.000104	0.000159375	***
AC093627.10	PAM50 Normal	PAM50 Basal	40	194	2680	0.002	0.003	0.00342622	**
AC093627.10	Normal	PAM50 Normal	112	40	2085	0.518	0.518	0.569898	ns
AC093627.10	Normal	PAM50 LumA	112	566	43734	2.07e-10	6.21e-10	7.89131e-10	****
AC093627.10	Normal	PAM50 LumB	112	207	18253	2.44e-17	1.22e-16	1.59321e-16	****
AC093627.10	Normal	PAM50 Her2	112	82	6475	1.1e-06	1.83e-06	2.85294e-06	****
AC093627.10	Normal	PAM50 Basal	112	194	7086	4.05e-07	7.59e-07	1.10248e-06	****
AC098617.1	PAM50 Her2	PAM50 Basal	82	194	7706.5	0.634	0.634	0.678037	ns
AC098617.1	PAM50 LumB	PAM50 Her2	207	82	8041	0.4	0.429	0.453919	ns
AC098617.1	PAM50 LumB	PAM50 Basal	207	194	18488	0.101	0.117	0.131759	ns
AC098617.1	PAM50 LumA	PAM50 LumB	566	207	81904	3.1e-19	9.3e-19	2.325e-18	****
AC098617.1	PAM50 LumA	PAM50 Her2	566	82	31388	7.93e-08	1.08e-07	2.31148e-07	****
AC098617.1	PAM50 LumA	PAM50 Basal	566	194	72247	5.07e-12	9.51e-12	2.22194e-11	****
AC098617.1	PAM50 Normal	PAM50 LumA	40	566	16345	1.42e-06	1.78e-06	3.6407e-06	****
AC098617.1	PAM50 Normal	PAM50 LumB	40	207	7253	1.33e-17	3.32e-17	8.82287e-17	****
AC098617.1	PAM50 Normal	PAM50 Her2	40	82	2819	8.81e-12	1.47e-11	3.79809e-11	****
AC098617.1	PAM50 Normal	PAM50 Basal	40	194	6546	5.07e-14	1.09e-13	2.62521e-13	****
AC098617.1	Normal	PAM50 Normal	112	40	3784	1.06e-10	1.59e-10	4.13485e-10	****
AC098617.1	Normal	PAM50 LumA	112	566	60006	2.88e-52	4.32e-51	3.39762e-50	****
AC098617.1	Normal	PAM50 LumB	112	207	22902	1.38e-51	1.03e-50	1.54454e-49	****
AC098617.1	Normal	PAM50 Her2	112	82	9019.5	4.9e-31	1.84e-30	8.43728e-30	****
AC098617.1	Normal	PAM50 Basal	112	194	21055.5	1.36e-45	6.8e-45	7.81105e-44	****
ACBD5	PAM50 Her2	PAM50 Basal	82	194	8282	0.589	0.631	0.636304	ns
ACBD5	PAM50 LumB	PAM50 Her2	207	82	11903	9.67e-08	2.9e-07	2.79164e-07	****
ACBD5	PAM50 LumB	PAM50 Basal	207	194	27757	3.61e-11	1.56e-10	1.47406e-10	****
ACBD5	PAM50 LumA	PAM50 LumB	566	207	39257	2.08e-12	1.56e-11	9.38904e-12	****
ACBD5	PAM50 LumA	PAM50 Her2	566	82	25539	0.141	0.176	0.178603	ns
ACBD5	PAM50 LumA	PAM50 Basal	566	194	61956	0.008	0.013	0.0126293	*
ACBD5	PAM50 Normal	PAM50 LumA	40	566	6649	1.27e-05	3.18e-05	2.92458e-05	****
ACBD5	PAM50 Normal	PAM50 LumB	40	207	1410	4.16e-11	1.56e-10	1.69073e-10	****
ACBD5	PAM50 Normal	PAM50 Her2	40	82	1138	0.006	0.012	0.00965352	**
ACBD5	PAM50 Normal	PAM50 Basal	40	194	3013	0.026	0.039	0.0377419	*
ACBD5	Normal	PAM50 Normal	112	40	3199	6.06e-05	0.00013	0.000128845	***
ACBD5	Normal	PAM50 LumA	112	566	28153	0.061	0.084	0.0831169	ns
ACBD5	Normal	PAM50 LumB	112	207	5979	9.47e-13	1.42e-11	4.41158e-12	****
ACBD5	Normal	PAM50 Her2	112	82	4767	0.651	0.651	0.694093	ns
ACBD5	Normal	PAM50 Basal	112	194	11709	0.257	0.297	0.307176	ns
ACTR3B	PAM50 Her2	PAM50 Basal	82	194	2324	1.54e-20	5.78e-20	1.27072e-19	****
ACTR3B	PAM50 LumB	PAM50 Her2	207	82	9640	0.072	0.154	0.0967462	ns
ACTR3B	PAM50 LumB	PAM50 Basal	207	194	5696	2.61e-35	1.96e-34	6.14159e-34	****
ACTR3B	PAM50 LumA	PAM50 LumB	566	207	58402	0.948	0.948	0.956436	ns
ACTR3B	PAM50 LumA	PAM50 Her2	566	82	26404	0.044	0.109	0.0614789	ns
ACTR3B	PAM50 LumA	PAM50 Basal	566	194	14555	8.97e-53	1.35e-51	1.11869e-50	****
ACTR3B	PAM50 Normal	PAM50 LumA	40	566	11896	0.591	0.737	0.638306	ns
ACTR3B	PAM50 Normal	PAM50 LumB	40	207	4369	0.581	0.737	0.629062	ns
ACTR3B	PAM50 Normal	PAM50 Her2	40	82	1944	0.098	0.184	0.128056	ns
ACTR3B	PAM50 Normal	PAM50 Basal	40	194	1476	7.03e-10	2.11e-09	2.55079e-09	****
ACTR3B	Normal	PAM50 Normal	112	40	2033	0.388	0.582	0.442083	ns
ACTR3B	Normal	PAM50 LumA	112	566	30924	0.684	0.737	0.724411	ns
ACTR3B	Normal	PAM50 LumB	112	207	11276	0.688	0.737	0.728117	ns
ACTR3B	Normal	PAM50 Her2	112	82	5052	0.234	0.39	0.282118	ns
ACTR3B	Normal	PAM50 Basal	112	194	3339	5.98e-24	2.99e-23	6.2372e-23	****
ACVR1C	PAM50 Her2	PAM50 Basal	82	194	8036	0.893	0.893	0.909036	ns
ACVR1C	PAM50 LumB	PAM50 Her2	207	82	7080	0.028	0.033	0.0403766	*
ACVR1C	PAM50 LumB	PAM50 Basal	207	194	17056	0.009	0.012	0.0141059	*
ACVR1C	PAM50 LumA	PAM50 LumB	566	207	76250	1.3e-10	3.25e-10	5.02613e-10	****
ACVR1C	PAM50 LumA	PAM50 Her2	566	82	26680	0.028	0.033	0.0403766	*
ACVR1C	PAM50 LumA	PAM50 Basal	566	194	62988	0.002	0.004	0.00342622	**
ACVR1C	PAM50 Normal	PAM50 LumA	40	566	13124	0.092	0.098	0.121122	ns
ACVR1C	PAM50 Normal	PAM50 LumB	40	207	5976	9.12e-06	1.95e-05	2.13853e-05	****
ACVR1C	PAM50 Normal	PAM50 Her2	40	82	2138	0.007	0.01	0.0111332	*
ACVR1C	PAM50 Normal	PAM50 Basal	40	194	5043	0.003	0.005	0.0050317	**
ACVR1C	Normal	PAM50 Normal	112	40	4068	2.07e-14	6.21e-14	1.10798e-13	****
ACVR1C	Normal	PAM50 LumA	112	566	59201	8.72e-48	1.31e-46	6.50646e-46	****
ACVR1C	Normal	PAM50 LumB	112	207	22517	6.9e-44	5.18e-43	3.29164e-42	****
ACVR1C	Normal	PAM50 Her2	112	82	8787	1.83e-27	6.86e-27	2.39878e-26	****
ACVR1C	Normal	PAM50 Basal	112	194	20727	6.04e-40	3.02e-39	1.9823e-38	****
ADCY7	PAM50 Her2	PAM50 Basal	82	194	5301	1.2e-05	4.5e-05	2.77436e-05	****
ADCY7	PAM50 LumB	PAM50 Her2	207	82	7102	0.031	0.057	0.0443874	*
ADCY7	PAM50 LumB	PAM50 Basal	207	194	11128	1.19e-14	8.92e-14	6.50106e-14	****
ADCY7	PAM50 LumA	PAM50 LumB	566	207	60959	0.387	0.415	0.441116	ns
ADCY7	PAM50 LumA	PAM50 Her2	566	82	20123	0.052	0.078	0.0718519	ns
ADCY7	PAM50 LumA	PAM50 Basal	566	194	31118	2.01e-19	3.02e-18	1.53252e-18	****
ADCY7	PAM50 Normal	PAM50 LumA	40	566	13709	0.026	0.057	0.0377419	*
ADCY7	PAM50 Normal	PAM50 LumB	40	207	5078	0.023	0.057	0.0337462	*
ADCY7	PAM50 Normal	PAM50 Her2	40	82	1815	0.341	0.393	0.39508	ns
ADCY7	PAM50 Normal	PAM50 Basal	40	194	3042	0.032	0.057	0.0456919	*
ADCY7	Normal	PAM50 Normal	112	40	1733	0.034	0.057	0.0482399	*
ADCY7	Normal	PAM50 LumA	112	566	32173	0.801	0.801	0.827934	ns
ADCY7	Normal	PAM50 LumB	112	207	12407	0.3	0.375	0.352585	ns
ADCY7	Normal	PAM50 Her2	112	82	3908	0.077	0.105	0.102706	ns
ADCY7	Normal	PAM50 Basal	112	194	5896	2.69e-11	1.34e-10	1.10929e-10	****
ADGRG2	PAM50 Her2	PAM50 Basal	82	194	4917	5.42e-07	1.16e-06	1.45143e-06	****
ADGRG2	PAM50 LumB	PAM50 Her2	207	82	7123	0.033	0.038	0.0470351	*
ADGRG2	PAM50 LumB	PAM50 Basal	207	194	10667	4.89e-16	1.83e-15	2.95635e-15	****
ADGRG2	PAM50 LumA	PAM50 LumB	566	207	70573	1.29e-05	2.15e-05	2.96907e-05	****
ADGRG2	PAM50 LumA	PAM50 Her2	566	82	24182	0.538	0.538	0.588343	ns
ADGRG2	PAM50 LumA	PAM50 Basal	566	194	34849	2.98e-14	8.94e-14	1.56908e-13	****
ADGRG2	PAM50 Normal	PAM50 LumA	40	566	14929	0.000746	0.001	0.00137396	**
ADGRG2	PAM50 Normal	PAM50 LumB	40	207	6113	1.86e-06	3.49e-06	4.71892e-06	****
ADGRG2	PAM50 Normal	PAM50 Her2	40	82	2198	0.002	0.003	0.00342622	**
ADGRG2	PAM50 Normal	PAM50 Basal	40	194	3193	0.078	0.084	0.10396	ns
ADGRG2	Normal	PAM50 Normal	112	40	3521	8.42e-08	2.1e-07	2.44614e-07	****
ADGRG2	Normal	PAM50 LumA	112	566	57429	4.79e-42	7.18e-41	1.88364e-40	****
ADGRG2	Normal	PAM50 LumB	112	207	21935	1.62e-39	1.22e-38	5.16153e-38	****
ADGRG2	Normal	PAM50 Her2	112	82	8303	7.63e-22	3.81e-21	6.8883e-21	****
ADGRG2	Normal	PAM50 Basal	112	194	13174	0.002	0.003	0.00342622	**
ADPRHL1	PAM50 Her2	PAM50 Basal	82	194	10272	0.000131	0.000328	0.00026658	***
ADPRHL1	PAM50 LumB	PAM50 Her2	207	82	8596	0.865	0.889	0.884245	ns
ADPRHL1	PAM50 LumB	PAM50 Basal	207	194	26482	3.39e-08	1.49e-07	1.03046e-07	****
ADPRHL1	PAM50 LumA	PAM50 LumB	566	207	63483	0.075	0.112	0.100314	ns
ADPRHL1	PAM50 LumA	PAM50 Her2	566	82	25333	0.18	0.245	0.223052	ns
ADPRHL1	PAM50 LumA	PAM50 Basal	566	194	77369	1.68e-17	2.52e-16	1.10857e-16	****
ADPRHL1	PAM50 Normal	PAM50 LumA	40	566	6386	4.02e-06	1.21e-05	9.77838e-06	****
ADPRHL1	PAM50 Normal	PAM50 LumB	40	207	2777	0.000989	0.002	0.00177475	**
ADPRHL1	PAM50 Normal	PAM50 Her2	40	82	1184	0.013	0.022	0.0198791	*
ADPRHL1	PAM50 Normal	PAM50 Basal	40	194	4030	0.701	0.809	0.739813	ns
ADPRHL1	Normal	PAM50 Normal	112	40	2206	0.889	0.889	0.905597	ns
ADPRHL1	Normal	PAM50 LumA	112	566	15841	5.7e-17	4.28e-16	3.6589e-16	****
ADPRHL1	Normal	PAM50 LumB	112	207	7273	3.97e-08	1.49e-07	1.19511e-07	****
ADPRHL1	Normal	PAM50 Her2	112	82	3147	0.000185	0.000396	0.000368817	***
ADPRHL1	Normal	PAM50 Basal	112	194	11215	0.638	0.797	0.681898	ns
AFAP1-AS1	PAM50 Her2	PAM50 Basal	82	194	3041	5.2e-16	1.95e-15	3.13076e-15	****
AFAP1-AS1	PAM50 LumB	PAM50 Her2	207	82	7219	0.048	0.08	0.0666412	ns
AFAP1-AS1	PAM50 LumB	PAM50 Basal	207	194	5196	1.1e-37	8.25e-37	3.12801e-36	****
AFAP1-AS1	PAM50 LumA	PAM50 LumB	566	207	70237	2.24e-05	5.6e-05	5.00517e-05	****
AFAP1-AS1	PAM50 LumA	PAM50 Her2	566	82	24224	0.521	0.558	0.572765	ns
AFAP1-AS1	PAM50 LumA	PAM50 Basal	566	194	17429	9.1e-46	1.36e-44	5.36777e-44	****
AFAP1-AS1	PAM50 Normal	PAM50 LumA	40	566	12673.5	0.206	0.309	0.251803	ns
AFAP1-AS1	PAM50 Normal	PAM50 LumB	40	207	5321	0.004	0.008	0.00659615	**
AFAP1-AS1	PAM50 Normal	PAM50 Her2	40	82	1850	0.253	0.342	0.302934	ns
AFAP1-AS1	PAM50 Normal	PAM50 Basal	40	194	1437	3.71e-10	1.11e-09	1.38234e-09	****
AFAP1-AS1	Normal	PAM50 Normal	112	40	1978	0.274	0.342	0.325003	ns
AFAP1-AS1	Normal	PAM50 LumA	112	566	32083	0.838	0.838	0.860777	ns
AFAP1-AS1	Normal	PAM50 LumB	112	207	14088	0.002	0.003	0.00342622	**
AFAP1-AS1	Normal	PAM50 Her2	112	82	4887	0.446	0.515	0.499305	ns
AFAP1-AS1	Normal	PAM50 Basal	112	194	3389	1.18e-23	5.9e-23	1.20767e-22	****
AKAP1	PAM50 Her2	PAM50 Basal	82	194	6090	0.002	0.004	0.00342622	**
AKAP1	PAM50 LumB	PAM50 Her2	207	82	10921	0.000145	0.000311	0.000293837	***
AKAP1	PAM50 LumB	PAM50 Basal	207	194	21727	0.155	0.179	0.19453	ns
AKAP1	PAM50 LumA	PAM50 LumB	566	207	42670	7.13e-09	3.11e-08	2.33915e-08	****
AKAP1	PAM50 LumA	PAM50 Her2	566	82	25855	0.095	0.129	0.124527	ns
AKAP1	PAM50 LumA	PAM50 Basal	566	194	45634	0.000445	0.000834	0.000844716	***
AKAP1	PAM50 Normal	PAM50 LumA	40	566	11278	0.969	0.969	0.974133	ns
AKAP1	PAM50 Normal	PAM50 LumB	40	207	3083	0.011	0.016	0.0169935	*
AKAP1	PAM50 Normal	PAM50 Her2	40	82	1820	0.328	0.351	0.381894	ns
AKAP1	PAM50 Normal	PAM50 Basal	40	194	3253	0.108	0.135	0.140137	ns
AKAP1	Normal	PAM50 Normal	112	40	3594	1.49e-08	4.47e-08	4.71293e-08	****
AKAP1	Normal	PAM50 LumA	112	566	52674	1.64e-28	2.46e-27	2.29442e-27	****
AKAP1	Normal	PAM50 LumB	112	207	15120	7.25e-06	1.81e-05	1.71617e-05	****
AKAP1	Normal	PAM50 Her2	112	82	7117	6.37e-11	4.78e-10	2.53927e-10	****
AKAP1	Normal	PAM50 Basal	112	194	15161	8.28e-09	3.11e-08	2.7002e-08	****
AL450992.2	PAM50 Her2	PAM50 Basal	82	194	7118	0.168	0.21	0.209102	ns
AL450992.2	PAM50 LumB	PAM50 Her2	207	82	7298	0.064	0.095	0.0867712	ns
AL450992.2	PAM50 LumB	PAM50 Basal	207	194	15314	3.99e-05	0.00015	8.68863e-05	****
AL450992.2	PAM50 LumA	PAM50 LumB	566	207	61805	0.241	0.278	0.289718	ns
AL450992.2	PAM50 LumA	PAM50 Her2	566	82	20853	0.138	0.188	0.175158	ns
AL450992.2	PAM50 LumA	PAM50 Basal	566	194	43858	2.85e-05	0.000142	6.29727e-05	****
AL450992.2	PAM50 Normal	PAM50 LumA	40	566	13432	0.048	0.081	0.0666412	ns
AL450992.2	PAM50 Normal	PAM50 LumB	40	207	5075	0.024	0.045	0.0350837	*
AL450992.2	PAM50 Normal	PAM50 Her2	40	82	1743	0.576	0.617	0.624578	ns
AL450992.2	PAM50 Normal	PAM50 Basal	40	194	3693	0.632	0.632	0.67623	ns
AL450992.2	Normal	PAM50 Normal	112	40	2854	0.01	0.026	0.0155643	*
AL450992.2	Normal	PAM50 LumA	112	566	46574	3.98e-15	5.97e-14	2.25035e-14	****
AL450992.2	Normal	PAM50 LumB	112	207	17313	3.45e-13	2.59e-12	1.66861e-12	****
AL450992.2	Normal	PAM50 Her2	112	82	5984	0.000316	0.000948	0.000613449	***
AL450992.2	Normal	PAM50 Basal	112	194	12594	0.02	0.044	0.0296435	*
ALDH1L2	PAM50 Her2	PAM50 Basal	82	194	5595	9.94e-05	0.000373	0.000204999	***
ALDH1L2	PAM50 LumB	PAM50 Her2	207	82	6824	0.009	0.022	0.0141059	*
ALDH1L2	PAM50 LumB	PAM50 Basal	207	194	10810	1.34e-15	2.01e-14	7.86698e-15	****
ALDH1L2	PAM50 LumA	PAM50 LumB	566	207	68099	0.000536	0.002	0.00100543	**
ALDH1L2	PAM50 LumA	PAM50 Her2	566	82	22799	0.798	0.798	0.825811	ns
ALDH1L2	PAM50 LumA	PAM50 Basal	566	194	37422	3.5e-11	2.62e-10	1.42981e-10	****
ALDH1L2	PAM50 Normal	PAM50 LumA	40	566	12388	0.319	0.385	0.372408	ns
ALDH1L2	PAM50 Normal	PAM50 LumB	40	207	5202	0.01	0.022	0.0155643	*
ALDH1L2	PAM50 Normal	PAM50 Her2	40	82	1762	0.508	0.544	0.559813	ns
ALDH1L2	PAM50 Normal	PAM50 Basal	40	194	3035	0.03	0.051	0.0430261	*
ALDH1L2	Normal	PAM50 Normal	112	40	1825	0.083	0.124	0.11017	ns
ALDH1L2	Normal	PAM50 LumA	112	566	29865	0.334	0.385	0.388	ns
ALDH1L2	Normal	PAM50 LumB	112	207	13509	0.015	0.028	0.0227068	*
ALDH1L2	Normal	PAM50 Her2	112	82	4043	0.156	0.213	0.195532	ns
ALDH1L2	Normal	PAM50 Basal	112	194	6349	1.4e-09	7e-09	4.95018e-09	****
ALDH3A1	PAM50 Her2	PAM50 Basal	82	194	3822	9.24e-12	1.73e-11	3.97366e-11	****
ALDH3A1	PAM50 LumB	PAM50 Her2	207	82	8048	0.494	0.494	0.54597	ns
ALDH3A1	PAM50 LumB	PAM50 Basal	207	194	8801	2.4e-22	7.2e-22	2.2242e-21	****
ALDH3A1	PAM50 LumA	PAM50 LumB	566	207	78611	3.18e-13	7.95e-13	1.5466e-12	****
ALDH3A1	PAM50 LumA	PAM50 Her2	566	82	30061	1.52e-05	1.75e-05	3.46646e-05	****
ALDH3A1	PAM50 LumA	PAM50 Basal	566	194	39507.5	5.42e-09	8.13e-09	1.80322e-08	****
ALDH3A1	PAM50 Normal	PAM50 LumA	40	566	16453	1.62e-06	2.02e-06	4.13285e-06	****
ALDH3A1	PAM50 Normal	PAM50 LumB	40	207	7113	6.65e-13	1.42e-12	3.13808e-12	****
ALDH3A1	PAM50 Normal	PAM50 Her2	40	82	2756	1.17e-09	1.95e-09	4.15714e-09	****
ALDH3A1	PAM50 Normal	PAM50 Basal	40	194	4480	0.124	0.133	0.158774	ns
ALDH3A1	Normal	PAM50 Normal	112	40	3606	1.11e-08	1.51e-08	3.56392e-08	****
ALDH3A1	Normal	PAM50 LumA	112	566	58124	2.98e-44	4.47e-43	1.50378e-42	****
ALDH3A1	Normal	PAM50 LumB	112	207	22253	7.04e-42	5.28e-41	2.68381e-40	****
ALDH3A1	Normal	PAM50 Her2	112	82	8723	1.11e-26	5.55e-26	1.39429e-25	****
ALDH3A1	Normal	PAM50 Basal	112	194	18419	3.96e-24	1.48e-23	4.1904e-23	****
ALDH3A2	PAM50 Her2	PAM50 Basal	82	194	7969	0.981	0.981	0.984157	ns
ALDH3A2	PAM50 LumB	PAM50 Her2	207	82	12153	1.05e-08	1.75e-08	3.37998e-08	****
ALDH3A2	PAM50 LumB	PAM50 Basal	207	194	28515	3.52e-13	7.54e-13	1.69871e-12	****
ALDH3A2	PAM50 LumA	PAM50 LumB	566	207	60735	0.433	0.464	0.486435	ns
ALDH3A2	PAM50 LumA	PAM50 Her2	566	82	33903	1.46e-11	2.74e-11	6.18428e-11	****
ALDH3A2	PAM50 LumA	PAM50 Basal	566	194	79748	4.71e-21	2.36e-20	4.01154e-20	****
ALDH3A2	PAM50 Normal	PAM50 LumA	40	566	7277	0.000158	0.000237	0.000318701	***
ALDH3A2	PAM50 Normal	PAM50 LumB	40	207	2797	0.001	0.002	0.00177475	**
ALDH3A2	PAM50 Normal	PAM50 Her2	40	82	1865	0.221	0.255	0.268335	ns
ALDH3A2	PAM50 Normal	PAM50 Basal	40	194	4404	0.179	0.224	0.221907	ns
ALDH3A2	Normal	PAM50 Normal	112	40	4050	3.7e-14	1.11e-13	1.93535e-13	****
ALDH3A2	Normal	PAM50 LumA	112	566	46540	4.6e-15	1.72e-14	2.59251e-14	****
ALDH3A2	Normal	PAM50 LumB	112	207	17447	9.64e-14	2.41e-13	4.87021e-13	****
ALDH3A2	Normal	PAM50 Her2	112	82	8408	5.26e-23	3.94e-22	5.11356e-22	****
ALDH3A2	Normal	PAM50 Basal	112	194	19627	6.84e-32	1.03e-30	1.27049e-30	****
ALDH3B1	PAM50 Her2	PAM50 Basal	82	194	8202	0.683	0.764	0.723615	ns
ALDH3B1	PAM50 LumB	PAM50 Her2	207	82	7178	0.041	0.123	0.0575635	ns
ALDH3B1	PAM50 LumB	PAM50 Basal	207	194	17934	0.064	0.161	0.0867712	ns
ALDH3B1	PAM50 LumA	PAM50 LumB	566	207	63050	0.104	0.195	0.135268	ns
ALDH3B1	PAM50 LumA	PAM50 Her2	566	82	20944	0.153	0.255	0.192324	ns
ALDH3B1	PAM50 LumA	PAM50 Basal	566	194	51840	0.246	0.369	0.295241	ns
ALDH3B1	PAM50 Normal	PAM50 LumA	40	566	11604	0.791	0.791	0.819538	ns
ALDH3B1	PAM50 Normal	PAM50 LumB	40	207	4568	0.301	0.41	0.35357	ns
ALDH3B1	PAM50 Normal	PAM50 Her2	40	82	1533	0.561	0.701	0.610132	ns
ALDH3B1	PAM50 Normal	PAM50 Basal	40	194	3736	0.713	0.764	0.751296	ns
ALDH3B1	Normal	PAM50 Normal	112	40	1650	0.014	0.051	0.0213001	*
ALDH3B1	Normal	PAM50 LumA	112	566	24340	0.000103	0.000885	0.000211923	***
ALDH3B1	Normal	PAM50 LumB	112	207	10206	0.078	0.167	0.10396	ns
ALDH3B1	Normal	PAM50 Her2	112	82	3104	0.000118	0.000885	0.000241364	***
ALDH3B1	Normal	PAM50 Basal	112	194	8158	0.000285	0.001	0.00055574	***
ALDH9A1	PAM50 Her2	PAM50 Basal	82	194	7682	0.654	0.755	0.696951	ns
ALDH9A1	PAM50 LumB	PAM50 Her2	207	82	9847	0.034	0.063	0.0482399	*
ALDH9A1	PAM50 LumB	PAM50 Basal	207	194	22224	0.064	0.097	0.0867712	ns
ALDH9A1	PAM50 LumA	PAM50 LumB	566	207	60045	0.594	0.742	0.64115	ns
ALDH9A1	PAM50 LumA	PAM50 Her2	566	82	27696	0.005	0.01	0.00814366	**
ALDH9A1	PAM50 LumA	PAM50 Basal	566	194	62383	0.005	0.01	0.00814366	**
ALDH9A1	PAM50 Normal	PAM50 LumA	40	566	9198	0.047	0.079	0.0654089	ns
ALDH9A1	PAM50 Normal	PAM50 LumB	40	207	3500	0.122	0.166	0.156419	ns
ALDH9A1	PAM50 Normal	PAM50 Her2	40	82	1703	0.733	0.785	0.768844	ns
ALDH9A1	PAM50 Normal	PAM50 Basal	40	194	3841	0.921	0.921	0.933511	ns
ALDH9A1	Normal	PAM50 Normal	112	40	3367	2.44e-06	7.32e-06	6.09302e-06	****
ALDH9A1	Normal	PAM50 LumA	112	566	42181	3.1e-08	1.55e-07	9.4659e-08	****
ALDH9A1	Normal	PAM50 LumB	112	207	15542	5.09e-07	1.91e-06	1.36852e-06	****
ALDH9A1	Normal	PAM50 Her2	112	82	6750	2.34e-08	1.55e-07	7.24661e-08	****
ALDH9A1	Normal	PAM50 Basal	112	194	15129	1.07e-08	1.55e-07	3.44055e-08	****
AMN	PAM50 Her2	PAM50 Basal	82	194	2514	2.8e-19	1.4e-18	2.10906e-18	****
AMN	PAM50 LumB	PAM50 Her2	207	82	9438	0.138	0.138	0.175158	ns
AMN	PAM50 LumB	PAM50 Basal	207	194	7859	5.94e-26	4.46e-25	7.1329e-25	****
AMN	PAM50 LumA	PAM50 LumB	566	207	64398	0.034	0.043	0.0482399	*
AMN	PAM50 LumA	PAM50 Her2	566	82	28284	0.001	0.002	0.00177475	**
AMN	PAM50 LumA	PAM50 Basal	566	194	24035	1.32e-31	1.98e-30	2.38584e-30	****
AMN	PAM50 Normal	PAM50 LumA	40	566	16340	2.72e-06	4.08e-06	6.74591e-06	****
AMN	PAM50 Normal	PAM50 LumB	40	207	6254	3.23e-07	5.38e-07	8.87843e-07	****
AMN	PAM50 Normal	PAM50 Her2	40	82	2627	7.44e-08	1.4e-07	2.17811e-07	****
AMN	PAM50 Normal	PAM50 Basal	40	194	3138	0.057	0.066	0.0781423	ns
AMN	Normal	PAM50 Normal	112	40	1819	0.078	0.084	0.10396	ns
AMN	Normal	PAM50 LumA	112	566	41907.5	6.99e-08	1.4e-07	2.05256e-07	****
AMN	Normal	PAM50 LumB	112	207	16348	1.47e-09	4.41e-09	5.17881e-09	****
AMN	Normal	PAM50 Her2	112	82	6983	6.1e-10	2.29e-09	2.22444e-09	****
AMN	Normal	PAM50 Basal	112	194	6768	3.95e-08	9.88e-08	1.18991e-07	****
ANKH	PAM50 Her2	PAM50 Basal	82	194	4785	1.71e-07	5.13e-07	4.81713e-07	****
ANKH	PAM50 LumB	PAM50 Her2	207	82	7706	0.223	0.239	0.2705	ns
ANKH	PAM50 LumB	PAM50 Basal	207	194	10673	5.1e-16	7.65e-15	3.07692e-15	****
ANKH	PAM50 LumA	PAM50 LumB	566	207	70280	2.09e-05	4.48e-05	4.69041e-05	****
ANKH	PAM50 LumA	PAM50 Her2	566	82	25569	0.136	0.157	0.172896	ns
ANKH	PAM50 LumA	PAM50 Basal	566	194	37405	3.35e-11	1.68e-10	1.3711e-10	****
ANKH	PAM50 Normal	PAM50 LumA	40	566	15840	2.41e-05	4.52e-05	5.36443e-05	****
ANKH	PAM50 Normal	PAM50 LumB	40	207	6419	3.63e-08	1.36e-07	1.09844e-07	****
ANKH	PAM50 Normal	PAM50 Her2	40	82	2404	3.13e-05	5.22e-05	6.87938e-05	****
ANKH	PAM50 Normal	PAM50 Basal	40	194	4011	0.738	0.738	0.773253	ns
ANKH	Normal	PAM50 Normal	112	40	1715	0.028	0.035	0.0403766	*
ANKH	Normal	PAM50 LumA	112	566	40207	7e-06	1.75e-05	1.66331e-05	****
ANKH	Normal	PAM50 LumB	112	207	17165	1.37e-12	1.03e-11	6.2981e-12	****
ANKH	Normal	PAM50 Her2	112	82	6148	5.66e-05	8.49e-05	0.000120664	***
ANKH	Normal	PAM50 Basal	112	194	9055	0.015	0.021	0.0227068	*
ANKRD10	PAM50 Her2	PAM50 Basal	82	194	6387	0.01	0.016	0.0155643	*
ANKRD10	PAM50 LumB	PAM50 Her2	207	82	8962	0.459	0.492	0.511824	ns
ANKRD10	PAM50 LumB	PAM50 Basal	207	194	17547	0.029	0.044	0.0417015	*
ANKRD10	PAM50 LumA	PAM50 LumB	566	207	79014	1.06e-13	1.59e-12	5.3336e-13	****
ANKRD10	PAM50 LumA	PAM50 Her2	566	82	33213	2.69e-10	2.02e-09	1.01573e-09	****
ANKRD10	PAM50 LumA	PAM50 Basal	566	194	65774	3.79e-05	0.000142	8.26548e-05	****
ANKRD10	PAM50 Normal	PAM50 LumA	40	566	10787	0.619	0.619	0.664111	ns
ANKRD10	PAM50 Normal	PAM50 LumB	40	207	5570	0.000549	0.001	0.00102849	**
ANKRD10	PAM50 Normal	PAM50 Her2	40	82	2374	6.32e-05	0.000158	0.000133884	***
ANKRD10	PAM50 Normal	PAM50 Basal	40	194	4576	0.074	0.101	0.0991589	ns
ANKRD10	Normal	PAM50 Normal	112	40	1906	0.163	0.2	0.203459	ns
ANKRD10	Normal	PAM50 LumA	112	566	26141	0.003	0.006	0.0050317	**
ANKRD10	Normal	PAM50 LumB	112	207	14756	5.74e-05	0.000158	0.000122309	***
ANKRD10	Normal	PAM50 Her2	112	82	6260	1.59e-05	7.95e-05	3.61948e-05	****
ANKRD10	Normal	PAM50 Basal	112	194	11880	0.173	0.2	0.215019	ns
ANKRD35	PAM50 Her2	PAM50 Basal	82	194	4174	4.46e-10	6.69e-10	1.64773e-09	****
ANKRD35	PAM50 LumB	PAM50 Her2	207	82	7363	0.079	0.079	0.105213	ns
ANKRD35	PAM50 LumB	PAM50 Basal	207	194	8426	9.53e-24	2.86e-23	9.82254e-23	****
ANKRD35	PAM50 LumA	PAM50 LumB	566	207	88106	6.6e-27	2.89e-26	8.41139e-26	****
ANKRD35	PAM50 LumA	PAM50 Her2	566	82	31679	8.91e-08	1.22e-07	2.5782e-07	****
ANKRD35	PAM50 LumA	PAM50 Basal	566	194	42056	1.13e-06	1.41e-06	2.92467e-06	****
ANKRD35	PAM50 Normal	PAM50 LumA	40	566	18498	1.99e-11	3.32e-11	8.30832e-11	****
ANKRD35	PAM50 Normal	PAM50 LumB	40	207	7827	5.02e-19	1.26e-18	3.69205e-18	****
ANKRD35	PAM50 Normal	PAM50 Her2	40	82	2953	8.18e-13	1.75e-12	3.8352e-12	****
ANKRD35	PAM50 Normal	PAM50 Basal	40	194	4806	0.018	0.019	0.0268569	*
ANKRD35	Normal	PAM50 Normal	112	40	3306	8.27e-06	9.54e-06	1.94811e-05	****
ANKRD35	Normal	PAM50 LumA	112	566	59608	3.71e-49	5.57e-48	3.20676e-47	****
ANKRD35	Normal	PAM50 LumB	112	207	22724	1.69e-45	1.27e-44	9.58032e-44	****
ANKRD35	Normal	PAM50 Her2	112	82	8736	7.71e-27	2.89e-26	9.79742e-26	****
ANKRD35	Normal	PAM50 Basal	112	194	15869	1.92e-11	3.32e-11	8.02759e-11	****
ANKRD65	PAM50 Her2	PAM50 Basal	82	194	5526	6.18e-05	7.72e-05	0.000131109	***
ANKRD65	PAM50 LumB	PAM50 Her2	207	82	7389	0.087	0.1	0.115095	ns
ANKRD65	PAM50 LumB	PAM50 Basal	207	194	12143	7.82e-12	1.47e-11	3.38802e-11	****
ANKRD65	PAM50 LumA	PAM50 LumB	566	207	88815	3.91e-28	1.95e-27	5.32516e-27	****
ANKRD65	PAM50 LumA	PAM50 Her2	566	82	33288	1.98e-10	2.97e-10	7.56142e-10	****
ANKRD65	PAM50 LumA	PAM50 Basal	566	194	59315	0.094	0.101	0.123457	ns
ANKRD65	PAM50 Normal	PAM50 LumA	40	566	18222	1.12e-10	1.87e-10	4.35528e-10	****
ANKRD65	PAM50 Normal	PAM50 LumB	40	207	7831	4.6e-19	1.15e-18	3.39172e-18	****
ANKRD65	PAM50 Normal	PAM50 Her2	40	82	3042	2.11e-14	4.52e-14	1.12869e-13	****
ANKRD65	PAM50 Normal	PAM50 Basal	40	194	6166	4.55e-09	6.2e-09	1.52073e-08	****
ANKRD65	Normal	PAM50 Normal	112	40	2518	0.246	0.246	0.295241	ns
ANKRD65	Normal	PAM50 LumA	112	566	54435	3.3e-33	2.48e-32	6.76268e-32	****
ANKRD65	Normal	PAM50 LumB	112	207	22374	8.61e-43	1.29e-41	3.6666e-41	****
ANKRD65	Normal	PAM50 Her2	112	82	8761	3.82e-27	1.43e-26	4.93322e-26	****
ANKRD65	Normal	PAM50 Basal	112	194	18157	1.36e-22	4.08e-22	1.28216e-21	****
ANKRD7	PAM50 Her2	PAM50 Basal	82	194	2783.5	1.41e-17	7.05e-17	9.34647e-17	****
ANKRD7	PAM50 LumB	PAM50 Her2	207	82	10240	0.006	0.008	0.00965352	**
ANKRD7	PAM50 LumB	PAM50 Basal	207	194	11171	1.55e-14	5.81e-14	8.40988e-14	****
ANKRD7	PAM50 LumA	PAM50 LumB	566	207	60892	0.4	0.4	0.453919	ns
ANKRD7	PAM50 LumA	PAM50 Her2	566	82	29929	2.16e-05	4.05e-05	4.83632e-05	****
ANKRD7	PAM50 LumA	PAM50 Basal	566	194	30078	4.89e-21	7.34e-20	4.15269e-20	****
ANKRD7	PAM50 Normal	PAM50 LumA	40	566	14095	0.009	0.012	0.0141059	*
ANKRD7	PAM50 Normal	PAM50 LumB	40	207	5154	0.014	0.016	0.0213001	*
ANKRD7	PAM50 Normal	PAM50 Her2	40	82	2579	2.97e-07	6.36e-07	8.19213e-07	****
ANKRD7	PAM50 Normal	PAM50 Basal	40	194	2668	0.002	0.003	0.00342622	**
ANKRD7	Normal	PAM50 Normal	112	40	2793	0.021	0.022	0.0309941	*
ANKRD7	Normal	PAM50 LumA	112	566	45480	3.31e-13	9.93e-13	1.60624e-12	****
ANKRD7	Normal	PAM50 LumB	112	207	16215	4.07e-09	1.02e-08	1.36974e-08	****
ANKRD7	Normal	PAM50 Her2	112	82	7932	5.31e-18	3.98e-17	3.63009e-17	****
ANKRD7	Normal	PAM50 Basal	112	194	8791	0.005	0.008	0.00814366	**
AP006621.6	PAM50 Her2	PAM50 Basal	82	194	6177.5	0.003	0.006	0.0050317	**
AP006621.6	PAM50 LumB	PAM50 Her2	207	82	10470	0.002	0.004	0.00342622	**
AP006621.6	PAM50 LumB	PAM50 Basal	207	194	20602	0.652	0.699	0.695074	ns
AP006621.6	PAM50 LumA	PAM50 LumB	566	207	70918	7.2e-06	2.7e-05	1.70665e-05	****
AP006621.6	PAM50 LumA	PAM50 Her2	566	82	33426	1.12e-10	1.68e-09	4.35528e-10	****
AP006621.6	PAM50 LumA	PAM50 Basal	566	194	68515	2.49e-07	1.25e-06	6.91403e-07	****
AP006621.6	PAM50 Normal	PAM50 LumA	40	566	9388	0.071	0.097	0.0955201	ns
AP006621.6	PAM50 Normal	PAM50 LumB	40	207	4408	0.518	0.598	0.569898	ns
AP006621.6	PAM50 Normal	PAM50 Her2	40	82	2182	0.003	0.006	0.0050317	**
AP006621.6	PAM50 Normal	PAM50 Basal	40	194	4263	0.326	0.408	0.379768	ns
AP006621.6	Normal	PAM50 Normal	112	40	2719	0.045	0.068	0.0628258	ns
AP006621.6	Normal	PAM50 LumA	112	566	32358	0.727	0.727	0.763376	ns
AP006621.6	Normal	PAM50 LumB	112	207	14366	0.00042	0.001	0.000800044	***
AP006621.6	Normal	PAM50 Her2	112	82	6843	5.69e-09	4.27e-08	1.8873e-08	****
AP006621.6	Normal	PAM50 Basal	112	194	14020	2.31e-05	6.93e-05	5.14972e-05	****
APBA2	PAM50 Her2	PAM50 Basal	82	194	3736	3.41e-12	1.28e-11	1.51729e-11	****
APBA2	PAM50 LumB	PAM50 Her2	207	82	5319	7.59e-07	1.42e-06	2.00426e-06	****
APBA2	PAM50 LumB	PAM50 Basal	207	194	5169	8.12e-38	6.09e-37	2.33183e-36	****
APBA2	PAM50 LumA	PAM50 LumB	566	207	57227	0.622	0.666	0.666838	ns
APBA2	PAM50 LumA	PAM50 Her2	566	82	13101	1.8e-10	5.4e-10	6.88606e-10	****
APBA2	PAM50 LumA	PAM50 Basal	566	194	11537	1.11e-60	1.66e-59	2.85009e-58	****
APBA2	PAM50 Normal	PAM50 LumA	40	566	15083	0.000438	0.00073	0.000831971	***
APBA2	PAM50 Normal	PAM50 LumB	40	207	5222	0.009	0.012	0.0141059	*
APBA2	PAM50 Normal	PAM50 Her2	40	82	1407	0.205	0.256	0.250827	ns
APBA2	PAM50 Normal	PAM50 Basal	40	194	1436	3.65e-10	9.12e-10	1.36057e-09	****
APBA2	Normal	PAM50 Normal	112	40	1563	0.005	0.007	0.00814366	**
APBA2	Normal	PAM50 LumA	112	566	32887	0.53	0.612	0.580904	ns
APBA2	Normal	PAM50 LumB	112	207	11657	0.935	0.935	0.945725	ns
APBA2	Normal	PAM50 Her2	112	82	2632	3.93e-07	8.42e-07	1.07115e-06	****
APBA2	Normal	PAM50 Basal	112	194	2245	6.6e-31	3.3e-30	1.1188e-29	****
APBB3	PAM50 Her2	PAM50 Basal	82	194	7145	0.182	0.248	0.225306	ns
APBB3	PAM50 LumB	PAM50 Her2	207	82	12327	2.04e-09	5.1e-09	7.08683e-09	****
APBB3	PAM50 LumB	PAM50 Basal	207	194	27163	1.01e-09	3.03e-09	3.61365e-09	****
APBB3	PAM50 LumA	PAM50 LumB	566	207	68172	0.000485	0.000808	0.000915075	***
APBB3	PAM50 LumA	PAM50 Her2	566	82	36622	2.51e-17	1.88e-16	1.63525e-16	****
APBB3	PAM50 LumA	PAM50 Basal	566	194	81855	1.72e-24	2.58e-23	1.86067e-23	****
APBB3	PAM50 Normal	PAM50 LumA	40	566	10606	0.505	0.583	0.556859	ns
APBB3	PAM50 Normal	PAM50 LumB	40	207	4535	0.34	0.425	0.394183	ns
APBB3	PAM50 Normal	PAM50 Her2	40	82	2505	2.42e-06	5.19e-06	6.05173e-06	****
APBB3	PAM50 Normal	PAM50 Basal	40	194	5591	1.14e-05	2.14e-05	2.64405e-05	****
APBB3	Normal	PAM50 Normal	112	40	2345	0.662	0.662	0.70453	ns
APBB3	Normal	PAM50 LumA	112	566	30817	0.643	0.662	0.686653	ns
APBB3	Normal	PAM50 LumB	112	207	13317	0.028	0.042	0.0403766	*
APBB3	Normal	PAM50 Her2	112	82	7334	1.28e-12	4.8e-12	5.89367e-12	****
APBB3	Normal	PAM50 Basal	112	194	16296	3.22e-13	1.61e-12	1.56431e-12	****
APOBEC3D	PAM50 Her2	PAM50 Basal	82	194	7467	0.422	0.487	0.475854	ns
APOBEC3D	PAM50 LumB	PAM50 Her2	207	82	6821	0.009	0.021	0.0141059	*
APOBEC3D	PAM50 LumB	PAM50 Basal	207	194	15531	8.83e-05	0.000331	0.000183582	***
APOBEC3D	PAM50 LumA	PAM50 LumB	566	207	70729	9.92e-06	4.96e-05	2.31493e-05	****
APOBEC3D	PAM50 LumA	PAM50 Her2	566	82	23179	0.987	0.987	0.98938	ns
APOBEC3D	PAM50 LumA	PAM50 Basal	566	194	51422	0.187	0.273	0.230972	ns
APOBEC3D	PAM50 Normal	PAM50 LumA	40	566	14563	0.002	0.007	0.00342622	**
APOBEC3D	PAM50 Normal	PAM50 LumB	40	207	6042	4.29e-06	3.22e-05	1.04004e-05	****
APOBEC3D	PAM50 Normal	PAM50 Her2	40	82	2079	0.017	0.032	0.0255	*
APOBEC3D	PAM50 Normal	PAM50 Basal	40	194	4576	0.074	0.124	0.0991589	ns
APOBEC3D	Normal	PAM50 Normal	112	40	1623	0.01	0.021	0.0155643	*
APOBEC3D	Normal	PAM50 LumA	112	566	34125	0.2	0.273	0.245466	ns
APOBEC3D	Normal	PAM50 LumB	112	207	15263	3.04e-06	3.22e-05	7.50543e-06	****
APOBEC3D	Normal	PAM50 Her2	112	82	4917	0.401	0.487	0.454936	ns
APOBEC3D	Normal	PAM50 Basal	112	194	10645	0.769	0.824	0.801405	ns
APOL3	PAM50 Her2	PAM50 Basal	82	194	9343	0.022	0.03	0.0323715	*
APOL3	PAM50 LumB	PAM50 Her2	207	82	7129	0.034	0.043	0.0482399	*
APOL3	PAM50 LumB	PAM50 Basal	207	194	21507	0.218	0.252	0.264914	ns
APOL3	PAM50 LumA	PAM50 LumB	566	207	65245	0.015	0.026	0.0227068	*
APOL3	PAM50 LumA	PAM50 Her2	566	82	21447	0.267	0.267	0.317779	ns
APOL3	PAM50 LumA	PAM50 Basal	566	194	62863	0.003	0.006	0.0050317	**
APOL3	PAM50 Normal	PAM50 LumA	40	566	13845	0.018	0.027	0.0268569	*
APOL3	PAM50 Normal	PAM50 LumB	40	207	5332	0.004	0.009	0.00659615	**
APOL3	PAM50 Normal	PAM50 Her2	40	82	1845	0.265	0.267	0.315743	ns
APOL3	PAM50 Normal	PAM50 Basal	40	194	4922	0.008	0.014	0.0126293	*
APOL3	Normal	PAM50 Normal	112	40	3001	0.001	0.004	0.00177475	**
APOL3	Normal	PAM50 LumA	112	566	50253	1.15e-22	1.72e-21	1.09007e-21	****
APOL3	Normal	PAM50 LumB	112	207	18504	1.49e-18	1.12e-17	1.05926e-17	****
APOL3	Normal	PAM50 Her2	112	82	6658	8.96e-08	3.36e-07	2.59181e-07	****
APOL3	Normal	PAM50 Basal	112	194	16140	1.49e-12	7.45e-12	6.81745e-12	****
ARHGAP19	PAM50 Her2	PAM50 Basal	82	194	4591	2.88e-08	6.17e-08	8.84051e-08	****
ARHGAP19	PAM50 LumB	PAM50 Her2	207	82	12139	1.19e-08	2.98e-08	3.80678e-08	****
ARHGAP19	PAM50 LumB	PAM50 Basal	207	194	19433	0.578	0.578	0.626358	ns
ARHGAP19	PAM50 LumA	PAM50 LumB	566	207	62602	0.144	0.166	0.182059	ns
ARHGAP19	PAM50 LumA	PAM50 Her2	566	82	35077	6.76e-14	2.03e-13	3.46128e-13	****
ARHGAP19	PAM50 LumA	PAM50 Basal	566	194	56817	0.468	0.501	0.520199	ns
ARHGAP19	PAM50 Normal	PAM50 LumA	40	566	13771	0.022	0.03	0.0323715	*
ARHGAP19	PAM50 Normal	PAM50 LumB	40	207	5252	0.007	0.011	0.0111332	*
ARHGAP19	PAM50 Normal	PAM50 Her2	40	82	2582	2.82e-07	5.29e-07	7.7981e-07	****
ARHGAP19	PAM50 Normal	PAM50 Basal	40	194	4722	0.031	0.039	0.0443874	*
ARHGAP19	Normal	PAM50 Normal	112	40	3275	1.5e-05	2.5e-05	3.42442e-05	****
ARHGAP19	Normal	PAM50 LumA	112	566	52105	4.48e-27	6.72e-26	5.74308e-26	****
ARHGAP19	Normal	PAM50 LumB	112	207	19309	9.81e-23	7.36e-22	9.32912e-22	****
ARHGAP19	Normal	PAM50 Her2	112	82	8249	2.93e-21	1.47e-20	2.53759e-20	****
ARHGAP19	Normal	PAM50 Basal	112	194	17538	3.53e-19	1.32e-18	2.62943e-18	****
ARHGEF40	PAM50 Her2	PAM50 Basal	82	194	6877	0.076	0.081	0.101496	ns
ARHGEF40	PAM50 LumB	PAM50 Her2	207	82	10053	0.015	0.017	0.0227068	*
ARHGEF40	PAM50 LumB	PAM50 Basal	207	194	20766	0.554	0.554	0.603647	ns
ARHGEF40	PAM50 LumA	PAM50 LumB	566	207	84281	8.87e-21	2.66e-20	7.38885e-20	****
ARHGEF40	PAM50 LumA	PAM50 Her2	566	82	37122	1.59e-18	3.41e-18	1.1276e-17	****
ARHGEF40	PAM50 LumA	PAM50 Basal	566	194	78914	9.09e-20	2.27e-19	7.0727e-19	****
ARHGEF40	PAM50 Normal	PAM50 LumA	40	566	16107	7.72e-06	9.65e-06	1.82347e-05	****
ARHGEF40	PAM50 Normal	PAM50 LumB	40	207	7129	5.03e-13	8.38e-13	2.40087e-12	****
ARHGEF40	PAM50 Normal	PAM50 Her2	40	82	2966	4.86e-13	8.38e-13	2.321e-12	****
ARHGEF40	PAM50 Normal	PAM50 Basal	40	194	6611	2.48e-12	3.72e-12	1.11142e-11	****
ARHGEF40	Normal	PAM50 Normal	112	40	3526	7.5e-08	1.02e-07	2.19347e-07	****
ARHGEF40	Normal	PAM50 LumA	112	566	59031	3.22e-47	4.83e-46	2.26698e-45	****
ARHGEF40	Normal	PAM50 LumB	112	207	22558	3.33e-44	2.5e-43	1.64242e-42	****
ARHGEF40	Normal	PAM50 Her2	112	82	9036	1.29e-30	4.84e-30	2.13694e-29	****
ARHGEF40	Normal	PAM50 Basal	112	194	20977	6.6e-42	3.3e-41	2.52711e-40	****
ARL11	PAM50 Her2	PAM50 Basal	82	194	7809	0.812	0.812	0.837915	ns
ARL11	PAM50 LumB	PAM50 Her2	207	82	9675	0.064	0.119	0.0867712	ns
ARL11	PAM50 LumB	PAM50 Basal	207	194	23040	0.011	0.027	0.0169935	*
ARL11	PAM50 LumA	PAM50 LumB	566	207	53250	0.052	0.112	0.0718519	ns
ARL11	PAM50 LumA	PAM50 Her2	566	82	24038	0.6	0.678	0.646507	ns
ARL11	PAM50 LumA	PAM50 Basal	566	194	56981	0.431	0.592	0.484376	ns
ARL11	PAM50 Normal	PAM50 LumA	40	566	10483	0.434	0.592	0.487371	ns
ARL11	PAM50 Normal	PAM50 LumB	40	207	3457	0.099	0.165	0.129304	ns
ARL11	PAM50 Normal	PAM50 Her2	40	82	1552	0.633	0.678	0.677134	ns
ARL11	PAM50 Normal	PAM50 Basal	40	194	3667	0.586	0.678	0.633769	ns
ARL11	Normal	PAM50 Normal	112	40	1359	0.000229	0.000687	0.000451688	***
ARL11	Normal	PAM50 LumA	112	566	17972	4.29e-13	4.94e-12	2.05553e-12	****
ARL11	Normal	PAM50 LumB	112	207	5940	6.59e-13	4.94e-12	3.11145e-12	****
ARL11	Normal	PAM50 Her2	112	82	2559	1.43e-07	5.36e-07	4.05717e-07	****
ARL11	Normal	PAM50 Basal	112	194	6035	9.4e-11	4.7e-10	3.68487e-10	****
ARL2BP	PAM50 Her2	PAM50 Basal	82	194	9332	0.023	0.043	0.0337462	*
ARL2BP	PAM50 LumB	PAM50 Her2	207	82	8540	0.935	0.937	0.945725	ns
ARL2BP	PAM50 LumB	PAM50 Basal	207	194	23708	0.002	0.004	0.00342622	**
ARL2BP	PAM50 LumA	PAM50 LumB	566	207	56082	0.363	0.544	0.417247	ns
ARL2BP	PAM50 LumA	PAM50 Her2	566	82	22364	0.595	0.744	0.641912	ns
ARL2BP	PAM50 LumA	PAM50 Basal	566	194	62453	0.004	0.009	0.00659615	**
ARL2BP	PAM50 Normal	PAM50 LumA	40	566	11978	0.539	0.735	0.589289	ns
ARL2BP	PAM50 Normal	PAM50 LumB	40	207	4173	0.937	0.937	0.947309	ns
ARL2BP	PAM50 Normal	PAM50 Her2	40	82	1675	0.851	0.937	0.871668	ns
ARL2BP	PAM50 Normal	PAM50 Basal	40	194	4619	0.058	0.097	0.079401	ns
ARL2BP	Normal	PAM50 Normal	112	40	3113	0.000262	0.000786	0.000513184	***
ARL2BP	Normal	PAM50 LumA	112	566	45683	1.53e-13	1.15e-12	7.64125e-13	****
ARL2BP	Normal	PAM50 LumB	112	207	15790	9.38e-08	4.69e-07	2.70971e-07	****
ARL2BP	Normal	PAM50 Her2	112	82	6245	1.89e-05	7.09e-05	4.26129e-05	****
ARL2BP	Normal	PAM50 Basal	112	194	16509	3.71e-14	5.56e-13	1.93942e-13	****
ARL4A	PAM50 Her2	PAM50 Basal	82	194	10179	0.000242	0.000302	0.000476253	***
ARL4A	PAM50 LumB	PAM50 Her2	207	82	4195	2.08e-11	5.2e-11	8.66336e-11	****
ARL4A	PAM50 LumB	PAM50 Basal	207	194	14889	7.67e-06	1.15e-05	1.81314e-05	****
ARL4A	PAM50 LumA	PAM50 LumB	566	207	75622	5.69e-10	9.48e-10	2.08363e-09	****
ARL4A	PAM50 LumA	PAM50 Her2	566	82	17255	0.000173	0.000236	0.000347034	***
ARL4A	PAM50 LumA	PAM50 Basal	566	194	56744	0.485	0.485	0.536839	ns
ARL4A	PAM50 Normal	PAM50 LumA	40	566	18271	8.31e-11	1.78e-10	3.26932e-10	****
ARL4A	PAM50 Normal	PAM50 LumB	40	207	7403	3.1e-15	9.3e-15	1.76998e-14	****
ARL4A	PAM50 Normal	PAM50 Her2	40	82	2300	0.000322	0.000372	0.000623571	***
ARL4A	PAM50 Normal	PAM50 Basal	40	194	6307	4.83e-10	9.06e-10	1.7799e-09	****
ARL4A	Normal	PAM50 Normal	112	40	3009	0.001	0.001	0.00177475	**
ARL4A	Normal	PAM50 LumA	112	566	58565	1.11e-45	1.66e-44	6.4602e-44	****
ARL4A	Normal	PAM50 LumB	112	207	22201	1.74e-41	1.3e-40	6.43653e-40	****
ARL4A	Normal	PAM50 Her2	112	82	7915	7.94e-18	2.98e-17	5.35674e-17	****
ARL4A	Normal	PAM50 Basal	112	194	19994	1.79e-34	8.95e-34	4.0275e-33	****
ARL4D	PAM50 Her2	PAM50 Basal	82	194	11420	1.07e-08	3.21e-08	3.44055e-08	****
ARL4D	PAM50 LumB	PAM50 Her2	207	82	6072	0.000163	0.000272	0.000328105	***
ARL4D	PAM50 LumB	PAM50 Basal	207	194	23641	0.002	0.003	0.00342622	**
ARL4D	PAM50 LumA	PAM50 LumB	566	207	74900	2.92e-09	1.09e-08	9.96544e-09	****
ARL4D	PAM50 LumA	PAM50 Her2	566	82	22754	0.776	0.784	0.807543	ns
ARL4D	PAM50 LumA	PAM50 Basal	566	194	79003	6.66e-20	4.99e-19	5.23329e-19	****
ARL4D	PAM50 Normal	PAM50 LumA	40	566	13340	0.059	0.074	0.0806183	ns
ARL4D	PAM50 Normal	PAM50 LumB	40	207	5904	2.02e-05	3.79e-05	4.53915e-05	****
ARL4D	PAM50 Normal	PAM50 Her2	40	82	1903	0.152	0.175	0.19126	ns
ARL4D	PAM50 Normal	PAM50 Basal	40	194	6025	3.77e-08	9.42e-08	1.13843e-07	****
ARL4D	Normal	PAM50 Normal	112	40	2306	0.784	0.784	0.813928	ns
ARL4D	Normal	PAM50 LumA	112	566	39800	1.88e-05	3.79e-05	4.23983e-05	****
ARL4D	Normal	PAM50 LumB	112	207	17718	6.68e-15	3.34e-14	3.70734e-14	****
ARL4D	Normal	PAM50 Her2	112	82	5574	0.011	0.015	0.0169935	*
ARL4D	Normal	PAM50 Basal	112	194	17869	5.73e-21	8.6e-20	4.8378e-20	****
ARMC7	PAM50 Her2	PAM50 Basal	82	194	8311	0.556	0.596	0.605448	ns
ARMC7	PAM50 LumB	PAM50 Her2	207	82	10672	0.000648	0.001	0.00120235	**
ARMC7	PAM50 LumB	PAM50 Basal	207	194	26591	1.98e-08	7.42e-08	6.16895e-08	****
ARMC7	PAM50 LumA	PAM50 LumB	566	207	56706	0.495	0.571	0.546868	ns
ARMC7	PAM50 LumA	PAM50 Her2	566	82	28953	0.000287	0.000538	0.00055939	***
ARMC7	PAM50 LumA	PAM50 Basal	566	194	72384	3.48e-11	1.74e-10	1.4223e-10	****
ARMC7	PAM50 Normal	PAM50 LumA	40	566	8445	0.007	0.011	0.0111332	*
ARMC7	PAM50 Normal	PAM50 LumB	40	207	3105	0.012	0.017	0.0184372	*
ARMC7	PAM50 Normal	PAM50 Her2	40	82	1693	0.775	0.775	0.806695	ns
ARMC7	PAM50 Normal	PAM50 Basal	40	194	4258	0.333	0.416	0.386993	ns
ARMC7	Normal	PAM50 Normal	112	40	1113	2.44e-06	6.1e-06	6.09302e-06	****
ARMC7	Normal	PAM50 LumA	112	566	10640	1.03e-28	1.54e-27	1.46926e-27	****
ARMC7	Normal	PAM50 LumB	112	207	4132	2.38e-21	1.79e-20	2.07774e-20	****
ARMC7	Normal	PAM50 Her2	112	82	2821	4.58e-06	9.81e-06	1.10696e-05	****
ARMC7	Normal	PAM50 Basal	112	194	6858	7.77e-08	2.33e-07	2.26863e-07	****
ARSJ	PAM50 Her2	PAM50 Basal	82	194	8272	0.6	0.643	0.646507	ns
ARSJ	PAM50 LumB	PAM50 Her2	207	82	5457	2.24e-06	6.72e-06	5.61931e-06	****
ARSJ	PAM50 LumB	PAM50 Basal	207	194	14931	9.08e-06	2.27e-05	2.13144e-05	****
ARSJ	PAM50 LumA	PAM50 LumB	566	207	74074	1.74e-08	7.2e-08	5.45429e-08	****
ARSJ	PAM50 LumA	PAM50 Her2	566	82	21117	0.187	0.234	0.230972	ns
ARSJ	PAM50 LumA	PAM50 Basal	566	194	51731	0.23	0.265	0.277949	ns
ARSJ	PAM50 Normal	PAM50 LumA	40	566	15603	6.29e-05	0.000135	0.000133346	***
ARSJ	PAM50 Normal	PAM50 LumB	40	207	6465	1.92e-08	7.2e-08	5.99056e-08	****
ARSJ	PAM50 Normal	PAM50 Her2	40	82	2085	0.015	0.023	0.0227068	*
ARSJ	PAM50 Normal	PAM50 Basal	40	194	4745	0.027	0.036	0.0390896	*
ARSJ	Normal	PAM50 Normal	112	40	2264	0.922	0.922	0.934199	ns
ARSJ	Normal	PAM50 LumA	112	566	43836	1.46e-10	1.1e-09	5.62977e-10	****
ARSJ	Normal	PAM50 LumB	112	207	17950	6.19e-16	9.28e-15	3.71145e-15	****
ARSJ	Normal	PAM50 Her2	112	82	5882	0.000844	0.002	0.00154403	**
ARSJ	Normal	PAM50 Basal	112	194	13004	0.004	0.007	0.00659615	**
ATP10B	PAM50 Her2	PAM50 Basal	82	194	3828.5	9.94e-12	2.98e-11	4.26419e-11	****
ATP10B	PAM50 LumB	PAM50 Her2	207	82	6631.5	0.004	0.005	0.00659615	**
ATP10B	PAM50 LumB	PAM50 Basal	207	194	5453.5	1.8e-36	1.35e-35	4.62176e-35	****
ATP10B	PAM50 LumA	PAM50 LumB	566	207	64413	0.034	0.039	0.0482399	*
ATP10B	PAM50 LumA	PAM50 Her2	566	82	20119	0.051	0.055	0.0705371	ns
ATP10B	PAM50 LumA	PAM50 Basal	566	194	17126	1.65e-46	2.47e-45	1.0438e-44	****
ATP10B	PAM50 Normal	PAM50 LumA	40	566	16108	7.59e-06	1.42e-05	1.79471e-05	****
ATP10B	PAM50 Normal	PAM50 LumB	40	207	6225	4.56e-07	9.77e-07	1.23209e-06	****
ATP10B	PAM50 Normal	PAM50 Her2	40	82	2044	0.028	0.035	0.0403766	*
ATP10B	PAM50 Normal	PAM50 Basal	40	194	2401	0.000149	0.000248	0.000301453	***
ATP10B	Normal	PAM50 Normal	112	40	2409	0.481	0.481	0.532749	ns
ATP10B	Normal	PAM50 LumA	112	566	47394	1.11e-16	4.16e-16	6.99156e-16	****
ATP10B	Normal	PAM50 LumB	112	207	18133	8.59e-17	4.16e-16	5.45387e-16	****
ATP10B	Normal	PAM50 Her2	112	82	5972	0.000355	0.000532	0.000683536	***
ATP10B	Normal	PAM50 Basal	112	194	6822	5.94e-08	1.48e-07	1.75486e-07	****
ATP2A2	PAM50 Her2	PAM50 Basal	82	194	9232	0.035	0.053	0.049546	*
ATP2A2	PAM50 LumB	PAM50 Her2	207	82	9122	0.322	0.372	0.375409	ns
ATP2A2	PAM50 LumB	PAM50 Basal	207	194	25095	1.53e-05	5.74e-05	3.48744e-05	****
ATP2A2	PAM50 LumA	PAM50 LumB	566	207	34840	5.82e-18	8.73e-17	3.96632e-17	****
ATP2A2	PAM50 LumA	PAM50 Her2	566	82	16642	3.43e-05	0.000103	7.51415e-05	****
ATP2A2	PAM50 LumA	PAM50 Basal	566	194	48632	0.018	0.029	0.0268569	*
ATP2A2	PAM50 Normal	PAM50 LumA	40	566	10464	0.424	0.454	0.477677	ns
ATP2A2	PAM50 Normal	PAM50 LumB	40	207	2177	2.09e-06	1.04e-05	5.2718e-06	****
ATP2A2	PAM50 Normal	PAM50 Her2	40	82	1066	0.002	0.004	0.00342622	**
ATP2A2	PAM50 Normal	PAM50 Basal	40	194	3146	0.06	0.082	0.0818693	ns
ATP2A2	Normal	PAM50 Normal	112	40	2254	0.955	0.955	0.962386	ns
ATP2A2	Normal	PAM50 LumA	112	566	29518	0.25	0.312	0.299712	ns
ATP2A2	Normal	PAM50 LumB	112	207	5393	3.19e-15	2.39e-14	1.81899e-14	****
ATP2A2	Normal	PAM50 Her2	112	82	3024	4.96e-05	0.000124	0.000106863	***
ATP2A2	Normal	PAM50 Basal	112	194	9000	0.012	0.023	0.0184372	*
ATP2B1	PAM50 Her2	PAM50 Basal	82	194	11307	3.16e-08	7.9e-08	9.63226e-08	****
ATP2B1	PAM50 LumB	PAM50 Her2	207	82	7498	0.123	0.142	0.157609	ns
ATP2B1	PAM50 LumB	PAM50 Basal	207	194	26503	3.06e-08	7.9e-08	9.35685e-08	****
ATP2B1	PAM50 LumA	PAM50 LumB	566	207	55620	0.282	0.302	0.333721	ns
ATP2B1	PAM50 LumA	PAM50 Her2	566	82	19217	0.012	0.016	0.0184372	*
ATP2B1	PAM50 LumA	PAM50 Basal	566	194	70387	4.41e-09	1.65e-08	1.47677e-08	****
ATP2B1	PAM50 Normal	PAM50 LumA	40	566	14827	0.001	0.002	0.00177475	**
ATP2B1	PAM50 Normal	PAM50 LumB	40	207	5190	0.011	0.016	0.0169935	*
ATP2B1	PAM50 Normal	PAM50 Her2	40	82	1813	0.347	0.347	0.401339	ns
ATP2B1	PAM50 Normal	PAM50 Basal	40	194	5820	6.52e-07	1.4e-06	1.73166e-06	****
ATP2B1	Normal	PAM50 Normal	112	40	2716	0.047	0.058	0.0654089	ns
ATP2B1	Normal	PAM50 LumA	112	566	46765	1.77e-15	1.33e-14	1.02877e-14	****
ATP2B1	Normal	PAM50 LumB	112	207	16552	2.84e-10	1.42e-09	1.07006e-09	****
ATP2B1	Normal	PAM50 Her2	112	82	5945	0.000463	0.000868	0.000876217	***
ATP2B1	Normal	PAM50 Basal	112	194	17669	7.07e-20	1.06e-18	5.54547e-19	****
ATP6AP1L	PAM50 Her2	PAM50 Basal	82	194	10221	0.000184	0.000276	0.000367327	***
ATP6AP1L	PAM50 LumB	PAM50 Her2	207	82	12284	3.07e-09	7.67e-09	1.04569e-08	****
ATP6AP1L	PAM50 LumB	PAM50 Basal	207	194	32597	3.75e-27	2.81e-26	4.85e-26	****
ATP6AP1L	PAM50 LumA	PAM50 LumB	566	207	67839	0.000758	0.001	0.00139371	**
ATP6AP1L	PAM50 LumA	PAM50 Her2	566	82	37412	3.07e-19	1.54e-18	2.30448e-18	****
ATP6AP1L	PAM50 LumA	PAM50 Basal	566	194	96294	1.9e-55	2.85e-54	3.18981e-53	****
ATP6AP1L	PAM50 Normal	PAM50 LumA	40	566	5902	4.14e-07	7.76e-07	1.12487e-06	****
ATP6AP1L	PAM50 Normal	PAM50 LumB	40	207	2977	0.005	0.006	0.00814366	**
ATP6AP1L	PAM50 Normal	PAM50 Her2	40	82	2085	0.015	0.016	0.0227068	*
ATP6AP1L	PAM50 Normal	PAM50 Basal	40	194	5993	5.99e-08	1.28e-07	1.76844e-07	****
ATP6AP1L	Normal	PAM50 Normal	112	40	2567	0.172	0.172	0.213897	ns
ATP6AP1L	Normal	PAM50 LumA	112	566	19851	4e-10	1.2e-09	1.48659e-09	****
ATP6AP1L	Normal	PAM50 LumB	112	207	9560	0.01	0.011	0.0155643	*
ATP6AP1L	Normal	PAM50 Her2	112	82	6240	2e-05	3.33e-05	4.49884e-05	****
ATP6AP1L	Normal	PAM50 Basal	112	194	17523	4.23e-19	1.59e-18	3.1348e-18	****
ATP7B	PAM50 Her2	PAM50 Basal	82	194	13318	8.68e-19	2.6e-18	6.28328e-18	****
ATP7B	PAM50 LumB	PAM50 Her2	207	82	9981	0.02	0.025	0.0296435	*
ATP7B	PAM50 LumB	PAM50 Basal	207	194	36512	1.45e-45	1.09e-44	8.27353e-44	****
ATP7B	PAM50 LumA	PAM50 LumB	566	207	67698	0.000912	0.001	0.00166251	**
ATP7B	PAM50 LumA	PAM50 Her2	566	82	30672	2.45e-06	4.08e-06	6.11624e-06	****
ATP7B	PAM50 LumA	PAM50 Basal	566	194	104400	1.68e-78	2.52e-77	1.8333e-75	****
ATP7B	PAM50 Normal	PAM50 LumA	40	566	4987	3.27e-09	6.13e-09	1.10949e-08	****
ATP7B	PAM50 Normal	PAM50 LumB	40	207	2499	7.32e-05	0.00011	0.000153873	***
ATP7B	PAM50 Normal	PAM50 Her2	40	82	1311	0.073	0.078	0.0979994	ns
ATP7B	PAM50 Normal	PAM50 Basal	40	194	6312	4.45e-10	9.54e-10	1.64473e-09	****
ATP7B	Normal	PAM50 Normal	112	40	2547	0.2	0.2	0.245466	ns
ATP7B	Normal	PAM50 LumA	112	566	11285	4.43e-27	1.66e-26	5.68734e-26	****
ATP7B	Normal	PAM50 LumB	112	207	6667	3.78e-10	9.45e-10	1.40782e-09	****
ATP7B	Normal	PAM50 Her2	112	82	3763	0.032	0.037	0.0456919	*
ATP7B	Normal	PAM50 Basal	112	194	19464	8.88e-31	4.44e-30	1.49082e-29	****
AZIN2	PAM50 Her2	PAM50 Basal	82	194	5834	0.000469	0.000879	0.000886803	***
AZIN2	PAM50 LumB	PAM50 Her2	207	82	10967	0.000108	0.000231	0.000221688	***
AZIN2	PAM50 LumB	PAM50 Basal	207	194	20231	0.896	0.896	0.911346	ns
AZIN2	PAM50 LumA	PAM50 LumB	566	207	87871	1.66e-26	1.25e-25	2.05849e-25	****
AZIN2	PAM50 LumA	PAM50 Her2	566	82	39701	2.21e-25	1.1e-24	2.55202e-24	****
AZIN2	PAM50 LumA	PAM50 Basal	566	194	80164	1.04e-21	3.9e-21	9.33114e-21	****
AZIN2	PAM50 Normal	PAM50 LumA	40	566	9012	0.031	0.036	0.0443874	*
AZIN2	PAM50 Normal	PAM50 LumB	40	207	5481	0.001	0.002	0.00177475	**
AZIN2	PAM50 Normal	PAM50 Her2	40	82	2606	1.4e-07	4.2e-07	3.97463e-07	****
AZIN2	PAM50 Normal	PAM50 Basal	40	194	5010	0.004	0.005	0.00659615	**
AZIN2	Normal	PAM50 Normal	112	40	1060	8.01e-07	2e-06	2.10624e-06	****
AZIN2	Normal	PAM50 LumA	112	566	9007	4.54e-33	6.81e-32	9.21726e-32	****
AZIN2	Normal	PAM50 LumB	112	207	9141	0.002	0.003	0.00342622	**
AZIN2	Normal	PAM50 Her2	112	82	5180	0.128	0.137	0.163536	ns
AZIN2	Normal	PAM50 Basal	112	194	8820	0.006	0.008	0.00965352	**
B2M	PAM50 Her2	PAM50 Basal	82	194	8691	0.224	0.336	0.271562	ns
B2M	PAM50 LumB	PAM50 Her2	207	82	7048	0.025	0.085	0.0364114	*
B2M	PAM50 LumB	PAM50 Basal	207	194	19140	0.418	0.522	0.471709	ns
B2M	PAM50 LumA	PAM50 LumB	566	207	52923	0.04	0.085	0.0562138	ns
B2M	PAM50 LumA	PAM50 Her2	566	82	16846	5.97e-05	0.000896	0.000126962	***
B2M	PAM50 LumA	PAM50 Basal	566	194	47709	0.006	0.032	0.00965352	**
B2M	PAM50 Normal	PAM50 LumA	40	566	13586	0.034	0.085	0.0482399	*
B2M	PAM50 Normal	PAM50 LumB	40	207	4514	0.367	0.5	0.421124	ns
B2M	PAM50 Normal	PAM50 Her2	40	82	1536	0.572	0.66	0.621012	ns
B2M	PAM50 Normal	PAM50 Basal	40	194	4035	0.692	0.741	0.731641	ns
B2M	Normal	PAM50 Normal	112	40	1727	0.032	0.085	0.0456919	*
B2M	Normal	PAM50 LumA	112	566	31787	0.962	0.962	0.968099	ns
B2M	Normal	PAM50 LumB	112	207	10279	0.095	0.158	0.124527	ns
B2M	Normal	PAM50 Her2	112	82	3125	0.000147	0.001	0.000297614	***
B2M	Normal	PAM50 Basal	112	194	9480	0.064	0.119	0.0867712	ns
B4GALNT4	PAM50 Her2	PAM50 Basal	82	194	5532	6.44e-05	0.000138	0.000136162	***
B4GALNT4	PAM50 LumB	PAM50 Her2	207	82	10980	9.96e-05	0.000166	0.000205315	***
B4GALNT4	PAM50 LumB	PAM50 Basal	207	194	19758	0.782	0.782	0.812141	ns
B4GALNT4	PAM50 LumA	PAM50 LumB	566	207	63825	0.056	0.071	0.0768679	ns
B4GALNT4	PAM50 LumA	PAM50 Her2	566	82	32217	1.29e-08	4.84e-08	4.10561e-08	****
B4GALNT4	PAM50 LumA	PAM50 Basal	566	194	58746	0.145	0.167	0.183244	ns
B4GALNT4	PAM50 Normal	PAM50 LumA	40	566	7148	9.7e-05	0.000166	0.000200428	***
B4GALNT4	PAM50 Normal	PAM50 LumB	40	207	3021	0.007	0.009	0.0111332	*
B4GALNT4	PAM50 Normal	PAM50 Her2	40	82	1696	0.762	0.782	0.794774	ns
B4GALNT4	PAM50 Normal	PAM50 Basal	40	194	2816	0.006	0.009	0.00965352	**
B4GALNT4	Normal	PAM50 Normal	112	40	1156	5.8e-06	1.45e-05	1.3899e-05	****
B4GALNT4	Normal	PAM50 LumA	112	566	7128	1.77e-38	2.66e-37	5.31e-37	****
B4GALNT4	Normal	PAM50 LumB	112	207	3520	1.01e-24	7.57e-24	1.12179e-23	****
B4GALNT4	Normal	PAM50 Her2	112	82	2556	1.37e-07	4.11e-07	3.89453e-07	****
B4GALNT4	Normal	PAM50 Basal	112	194	3456	2.92e-23	1.46e-22	2.92e-22	****
BAIAP2L2	PAM50 Her2	PAM50 Basal	82	194	2539	4.07e-19	1.53e-18	3.02135e-18	****
BAIAP2L2	PAM50 LumB	PAM50 Her2	207	82	8126	0.574	0.717	0.622874	ns
BAIAP2L2	PAM50 LumB	PAM50 Basal	207	194	6333	2.13e-32	1.6e-31	4.1414e-31	****
BAIAP2L2	PAM50 LumA	PAM50 LumB	566	207	61412	0.303	0.454	0.35568	ns
BAIAP2L2	PAM50 LumA	PAM50 Her2	566	82	23313	0.946	0.946	0.954639	ns
BAIAP2L2	PAM50 LumA	PAM50 Basal	566	194	18312	1.02e-43	1.53e-42	4.73649e-42	****
BAIAP2L2	PAM50 Normal	PAM50 LumA	40	566	13061	0.104	0.223	0.135268	ns
BAIAP2L2	PAM50 Normal	PAM50 LumB	40	207	4953	0.05	0.124	0.0692857	ns
BAIAP2L2	PAM50 Normal	PAM50 Her2	40	82	1902	0.154	0.257	0.193386	ns
BAIAP2L2	PAM50 Normal	PAM50 Basal	40	194	1681	1.7e-08	5.1e-08	5.34041e-08	****
BAIAP2L2	Normal	PAM50 Normal	112	40	1879	0.131	0.246	0.167075	ns
BAIAP2L2	Normal	PAM50 LumA	112	566	31989	0.877	0.946	0.894835	ns
BAIAP2L2	Normal	PAM50 LumB	112	207	12286	0.378	0.515	0.432099	ns
BAIAP2L2	Normal	PAM50 Her2	112	82	4548	0.91	0.946	0.923756	ns
BAIAP2L2	Normal	PAM50 Basal	112	194	2816	3.68e-27	1.84e-26	4.76653e-26	****
BATF	PAM50 Her2	PAM50 Basal	82	194	12131	5.5e-12	1.65e-11	2.40195e-11	****
BATF	PAM50 LumB	PAM50 Her2	207	82	7126	0.034	0.051	0.0482399	*
BATF	PAM50 LumB	PAM50 Basal	207	194	27892	1.63e-11	4.08e-11	6.8644e-11	****
BATF	PAM50 LumA	PAM50 LumB	566	207	69543	6.68e-05	0.000111	0.000141031	***
BATF	PAM50 LumA	PAM50 Her2	566	82	23928	0.649	0.708	0.692298	ns
BATF	PAM50 LumA	PAM50 Basal	566	194	84100	1.86e-28	2.79e-27	2.58976e-27	****
BATF	PAM50 Normal	PAM50 LumA	40	566	10850	0.661	0.708	0.703637	ns
BATF	PAM50 Normal	PAM50 LumB	40	207	4727	0.156	0.213	0.195532	ns
BATF	PAM50 Normal	PAM50 Her2	40	82	1602	0.838	0.838	0.860777	ns
BATF	PAM50 Normal	PAM50 Basal	40	194	5747	1.68e-06	3.15e-06	4.27966e-06	****
BATF	Normal	PAM50 Normal	112	40	939	5.28e-08	1.13e-07	1.56571e-07	****
BATF	Normal	PAM50 LumA	112	566	11431	1.02e-26	7.65e-26	1.28308e-25	****
BATF	Normal	PAM50 LumB	112	207	5805	1.85e-13	6.94e-13	9.17121e-13	****
BATF	Normal	PAM50 Her2	112	82	1673	4.2e-14	2.1e-13	2.18771e-13	****
BATF	Normal	PAM50 Basal	112	194	10177	0.357	0.446	0.410945	ns
BCL11A	PAM50 Her2	PAM50 Basal	82	194	598	6.62e-34	3.31e-33	1.43763e-32	****
BCL11A	PAM50 LumB	PAM50 Her2	207	82	4675	2.66e-09	3.32e-09	9.13166e-09	****
BCL11A	PAM50 LumB	PAM50 Basal	207	194	687	9.58e-63	7.18e-62	3.09753e-60	****
BCL11A	PAM50 LumA	PAM50 LumB	566	207	78856	1.64e-13	2.73e-13	8.1626e-13	****
BCL11A	PAM50 LumA	PAM50 Her2	566	82	19645	0.025	0.026	0.0364114	*
BCL11A	PAM50 LumA	PAM50 Basal	566	194	2433	5.68e-88	8.52e-87	2.47932e-84	****
BCL11A	PAM50 Normal	PAM50 LumA	40	566	20505	9.28e-18	1.74e-17	6.23188e-17	****
BCL11A	PAM50 Normal	PAM50 LumB	40	207	7769	1.76e-18	3.77e-18	1.24714e-17	****
BCL11A	PAM50 Normal	PAM50 Her2	40	82	2695	8.87e-09	1.02e-08	2.88077e-08	****
BCL11A	PAM50 Normal	PAM50 Basal	40	194	1321	5.27e-11	7.9e-11	2.11527e-10	****
BCL11A	Normal	PAM50 Normal	112	40	2137	0.668	0.668	0.71005	ns
BCL11A	Normal	PAM50 LumA	112	566	52869	5.16e-29	1.94e-28	7.55819e-28	****
BCL11A	Normal	PAM50 LumB	112	207	20162	1.17e-27	2.92e-27	1.5594e-26	****
BCL11A	Normal	PAM50 Her2	112	82	6992	5.26e-10	7.17e-10	1.93428e-09	****
BCL11A	Normal	PAM50 Basal	112	194	2691	5.86e-28	1.76e-27	7.90692e-27	****
BCL2L14	PAM50 Her2	PAM50 Basal	82	194	3647	1.19e-12	5.95e-12	5.49376e-12	****
BCL2L14	PAM50 LumB	PAM50 Her2	207	82	6131.5	0.000236	0.000393	0.000465179	***
BCL2L14	PAM50 LumB	PAM50 Basal	207	194	6414	4.89e-32	3.67e-31	9.20037e-31	****
BCL2L14	PAM50 LumA	PAM50 LumB	566	207	71685	1.87e-06	4.68e-06	4.74153e-06	****
BCL2L14	PAM50 LumA	PAM50 Her2	566	82	21742	0.356	0.381	0.409956	ns
BCL2L14	PAM50 LumA	PAM50 Basal	566	194	23434	8.79e-33	1.32e-31	1.76002e-31	****
BCL2L14	PAM50 Normal	PAM50 LumA	40	566	14142	0.008	0.011	0.0126293	*
BCL2L14	PAM50 Normal	PAM50 LumB	40	207	6075	2.92e-06	6.26e-06	7.21733e-06	****
BCL2L14	PAM50 Normal	PAM50 Her2	40	82	1951	0.09	0.113	0.118668	ns
BCL2L14	PAM50 Normal	PAM50 Basal	40	194	2289	4.5e-05	8.44e-05	9.7433e-05	****
BCL2L14	Normal	PAM50 Normal	112	40	2098	0.554	0.554	0.603647	ns
BCL2L14	Normal	PAM50 LumA	112	566	36982	0.005	0.008	0.00814366	**
BCL2L14	Normal	PAM50 LumB	112	207	15719	1.54e-07	4.62e-07	4.35369e-07	****
BCL2L14	Normal	PAM50 Her2	112	82	5082	0.205	0.237	0.250827	ns
BCL2L14	Normal	PAM50 Basal	112	194	5941	4.05e-11	1.52e-10	1.64755e-10	****
BCO2	PAM50 Her2	PAM50 Basal	82	194	5670	0.000164	0.000246	0.000329889	***
BCO2	PAM50 LumB	PAM50 Her2	207	82	9282	0.215	0.215	0.261742	ns
BCO2	PAM50 LumB	PAM50 Basal	207	194	16739	0.004	0.005	0.00659615	**
BCO2	PAM50 LumA	PAM50 LumB	566	207	72920	1.83e-07	3.92e-07	5.14191e-07	****
BCO2	PAM50 LumA	PAM50 Her2	566	82	32055	2.34e-08	6.95e-08	7.24661e-08	****
BCO2	PAM50 LumA	PAM50 Basal	566	194	61300	0.015	0.018	0.0227068	*
BCO2	PAM50 Normal	PAM50 LumA	40	566	13293	0.065	0.07	0.0880177	ns
BCO2	PAM50 Normal	PAM50 LumB	40	207	5913	1.83e-05	3.43e-05	4.13134e-05	****
BCO2	PAM50 Normal	PAM50 Her2	40	82	2659	2.78e-08	6.95e-08	8.54556e-08	****
BCO2	PAM50 Normal	PAM50 Basal	40	194	5176	0.00089	0.001	0.0016241	**
BCO2	Normal	PAM50 Normal	112	40	3187	7.49e-05	0.000125	0.00015722	***
BCO2	Normal	PAM50 LumA	112	566	46947	8.12e-16	3.04e-15	4.83874e-15	****
BCO2	Normal	PAM50 LumB	112	207	19077	1.75e-21	1.31e-20	1.54318e-20	****
BCO2	Normal	PAM50 Her2	112	82	8488	6.52e-24	9.78e-23	6.76809e-23	****
BCO2	Normal	PAM50 Basal	112	194	17730	3.31e-20	1.65e-19	2.67558e-19	****
BEGAIN	PAM50 Her2	PAM50 Basal	82	194	5947	0.000929	0.001	0.00169173	**
BEGAIN	PAM50 LumB	PAM50 Her2	207	82	9145	0.305	0.305	0.357883	ns
BEGAIN	PAM50 LumB	PAM50 Basal	207	194	16664	0.003	0.004	0.0050317	**
BEGAIN	PAM50 LumA	PAM50 LumB	566	207	81605	5.51e-17	2.07e-16	3.53954e-16	****
BEGAIN	PAM50 LumA	PAM50 Her2	566	82	34382	1.74e-12	3.26e-12	7.89101e-12	****
BEGAIN	PAM50 LumA	PAM50 Basal	566	194	64403	0.000318	0.000434	0.000617057	***
BEGAIN	PAM50 Normal	PAM50 LumA	40	566	16199	5.15e-06	7.72e-06	1.23924e-05	****
BEGAIN	PAM50 Normal	PAM50 LumB	40	207	7064	1.58e-12	3.26e-12	7.21412e-12	****
BEGAIN	PAM50 Normal	PAM50 Her2	40	82	2934	1.73e-12	3.26e-12	7.85382e-12	****
BEGAIN	PAM50 Normal	PAM50 Basal	40	194	5843	4.8e-07	8e-07	1.29613e-06	****
BEGAIN	Normal	PAM50 Normal	112	40	2540	0.21	0.225	0.256155	ns
BEGAIN	Normal	PAM50 LumA	112	566	47877	1.3e-17	6.5e-17	8.63699e-17	****
BEGAIN	Normal	PAM50 LumB	112	207	19936	2.64e-26	3.96e-25	3.21888e-25	****
BEGAIN	Normal	PAM50 Her2	112	82	8251	2.79e-21	2.09e-20	2.42355e-20	****
BEGAIN	Normal	PAM50 Basal	112	194	17073	8.28e-17	2.48e-16	5.26854e-16	****
BLCAP	PAM50 Her2	PAM50 Basal	82	194	8446	0.417	0.417	0.470763	ns
BLCAP	PAM50 LumB	PAM50 Her2	207	82	10476	0.002	0.003	0.00342622	**
BLCAP	PAM50 LumB	PAM50 Basal	207	194	25845	6.67e-07	1.25e-06	1.76988e-06	****
BLCAP	PAM50 LumA	PAM50 LumB	566	207	62750	0.129	0.138	0.164741	ns
BLCAP	PAM50 LumA	PAM50 Her2	566	82	30593	3.13e-06	5.22e-06	7.71236e-06	****
BLCAP	PAM50 LumA	PAM50 Basal	566	194	75047	2.28e-14	6.84e-14	1.21516e-13	****
BLCAP	PAM50 Normal	PAM50 LumA	40	566	13365	0.056	0.065	0.0768679	ns
BLCAP	PAM50 Normal	PAM50 LumB	40	207	5163	0.013	0.017	0.0198791	*
BLCAP	PAM50 Normal	PAM50 Her2	40	82	2406	2.98e-05	4.47e-05	6.56292e-05	****
BLCAP	PAM50 Normal	PAM50 Basal	40	194	5833	5.48e-07	1.17e-06	1.46705e-06	****
BLCAP	Normal	PAM50 Normal	112	40	3629	6.26e-09	1.56e-08	2.06772e-08	****
BLCAP	Normal	PAM50 LumA	112	566	55834	3.34e-37	5.01e-36	9.1405e-36	****
BLCAP	Normal	PAM50 LumB	112	207	20400	4.01e-29	2e-28	5.90342e-28	****
BLCAP	Normal	PAM50 Her2	112	82	8445	2.01e-23	7.54e-23	2.02625e-22	****
BLCAP	Normal	PAM50 Basal	112	194	19902	8.12e-34	6.09e-33	1.746e-32	****
BRINP2	PAM50 Her2	PAM50 Basal	82	194	6724	0.042	0.064	0.0588634	ns
BRINP2	PAM50 LumB	PAM50 Her2	207	82	12057	2.5e-08	9.38e-08	7.72293e-08	****
BRINP2	PAM50 LumB	PAM50 Basal	207	194	25295	6.9e-06	1.72e-05	1.64134e-05	****
BRINP2	PAM50 LumA	PAM50 LumB	566	207	55629.5	0.283	0.327	0.334814	ns
BRINP2	PAM50 LumA	PAM50 Her2	566	82	32706	2.02e-09	1.01e-08	7.02014e-09	****
BRINP2	PAM50 LumA	PAM50 Basal	566	194	67330	2.48e-06	7.44e-06	6.1876e-06	****
BRINP2	PAM50 Normal	PAM50 LumA	40	566	11129	0.859	0.859	0.878832	ns
BRINP2	PAM50 Normal	PAM50 LumB	40	207	3790	0.398	0.426	0.45212	ns
BRINP2	PAM50 Normal	PAM50 Her2	40	82	2300	0.000322	0.00069	0.000623571	***
BRINP2	PAM50 Normal	PAM50 Basal	40	194	4688	0.038	0.064	0.0535669	ns
BRINP2	Normal	PAM50 Normal	112	40	2712	0.048	0.066	0.0666412	ns
BRINP2	Normal	PAM50 LumA	112	566	38438.5	0.000371	0.000696	0.0007123	***
BRINP2	Normal	PAM50 LumB	112	207	12860.5	0.107	0.134	0.138942	ns
BRINP2	Normal	PAM50 Her2	112	82	7598	7.25e-15	1.09e-13	4.01857e-14	****
BRINP2	Normal	PAM50 Basal	112	194	15377	1.42e-09	1.01e-08	5.01684e-09	****
BTBD11	PAM50 Her2	PAM50 Basal	82	194	11340	2.31e-08	4.95e-08	7.15879e-08	****
BTBD11	PAM50 LumB	PAM50 Her2	207	82	4998	5.13e-08	8.55e-08	1.5233e-07	****
BTBD11	PAM50 LumB	PAM50 Basal	207	194	20454	0.747	0.747	0.781276	ns
BTBD11	PAM50 LumA	PAM50 LumB	566	207	73239	9.72e-08	1.46e-07	2.80422e-07	****
BTBD11	PAM50 LumA	PAM50 Her2	566	82	17624	0.000427	0.000534	0.000812668	***
BTBD11	PAM50 LumA	PAM50 Basal	566	194	69314	4.73e-08	8.55e-08	1.41028e-07	****
BTBD11	PAM50 Normal	PAM50 LumA	40	566	18857	1.89e-12	4.88e-12	8.54464e-12	****
BTBD11	PAM50 Normal	PAM50 LumB	40	207	7052	1.95e-12	4.88e-12	8.81134e-12	****
BTBD11	PAM50 Normal	PAM50 Her2	40	82	2163	0.004	0.005	0.00659615	**
BTBD11	PAM50 Normal	PAM50 Basal	40	194	6655	1.1e-12	4.12e-12	5.09984e-12	****
BTBD11	Normal	PAM50 Normal	112	40	2525	0.234	0.251	0.282118	ns
BTBD11	Normal	PAM50 LumA	112	566	53248	5.3e-30	7.95e-29	8.38207e-29	****
BTBD11	Normal	PAM50 LumB	112	207	19822	1.23e-25	6.15e-25	1.43747e-24	****
BTBD11	Normal	PAM50 Her2	112	82	6236	2.1e-05	2.86e-05	4.70922e-05	****
BTBD11	Normal	PAM50 Basal	112	194	18670	1.2e-25	6.15e-25	1.40617e-24	****
BTN2A1	PAM50 Her2	PAM50 Basal	82	194	4264	1.14e-09	3.42e-09	4.05715e-09	****
BTN2A1	PAM50 LumB	PAM50 Her2	207	82	9845	0.034	0.046	0.0482399	*
BTN2A1	PAM50 LumB	PAM50 Basal	207	194	12613	1.22e-10	9.15e-10	4.7315e-10	****
BTN2A1	PAM50 LumA	PAM50 LumB	566	207	60817	0.416	0.446	0.469816	ns
BTN2A1	PAM50 LumA	PAM50 Her2	566	82	27887	0.003	0.005	0.0050317	**
BTN2A1	PAM50 LumA	PAM50 Basal	566	194	35778	4.26e-13	6.39e-12	2.0434e-12	****
BTN2A1	PAM50 Normal	PAM50 LumA	40	566	14762	0.001	0.002	0.00177475	**
BTN2A1	PAM50 Normal	PAM50 LumB	40	207	5470	0.001	0.002	0.00177475	**
BTN2A1	PAM50 Normal	PAM50 Her2	40	82	2343	0.000127	0.000272	0.000258984	***
BTN2A1	PAM50 Normal	PAM50 Basal	40	194	3509	0.342	0.417	0.396134	ns
BTN2A1	Normal	PAM50 Normal	112	40	2333	0.699	0.699	0.73797	ns
BTN2A1	Normal	PAM50 LumA	112	566	43694	2.38e-10	1.19e-09	9.03758e-10	****
BTN2A1	Normal	PAM50 LumB	112	207	16341	1.55e-09	3.88e-09	5.44746e-09	****
BTN2A1	Normal	PAM50 Her2	112	82	6970	7.54e-10	2.83e-09	2.72903e-09	****
BTN2A1	Normal	PAM50 Basal	112	194	10183	0.361	0.417	0.415276	ns
BTN3A1	PAM50 Her2	PAM50 Basal	82	194	7401	0.362	0.388	0.416372	ns
BTN3A1	PAM50 LumB	PAM50 Her2	207	82	7419	0.096	0.159	0.125706	ns
BTN3A1	PAM50 LumB	PAM50 Basal	207	194	16480	0.002	0.007	0.00342622	**
BTN3A1	PAM50 LumA	PAM50 LumB	566	207	61849	0.235	0.29	0.283246	ns
BTN3A1	PAM50 LumA	PAM50 Her2	566	82	21386	0.251	0.29	0.300869	ns
BTN3A1	PAM50 LumA	PAM50 Basal	566	194	47459	0.005	0.012	0.00814366	**
BTN3A1	PAM50 Normal	PAM50 LumA	40	566	14206	0.007	0.015	0.0111332	*
BTN3A1	PAM50 Normal	PAM50 LumB	40	207	5360	0.003	0.01	0.0050317	**
BTN3A1	PAM50 Normal	PAM50 Her2	40	82	1877	0.197	0.269	0.242124	ns
BTN3A1	PAM50 Normal	PAM50 Basal	40	194	4174	0.452	0.452	0.505115	ns
BTN3A1	Normal	PAM50 Normal	112	40	2563	0.177	0.265	0.219521	ns
BTN3A1	Normal	PAM50 LumA	112	566	44579	1.03e-11	1.54e-10	4.41429e-11	****
BTN3A1	Normal	PAM50 LumB	112	207	16856	2.17e-11	1.63e-10	9.0296e-11	****
BTN3A1	Normal	PAM50 Her2	112	82	5838	0.001	0.006	0.00177475	**
BTN3A1	Normal	PAM50 Basal	112	194	12681	0.015	0.028	0.0227068	*
BTN3A3	PAM50 Her2	PAM50 Basal	82	194	8187	0.701	0.701	0.739813	ns
BTN3A3	PAM50 LumB	PAM50 Her2	207	82	6705	0.005	0.019	0.00814366	**
BTN3A3	PAM50 LumB	PAM50 Basal	207	194	17147	0.012	0.025	0.0184372	*
BTN3A3	PAM50 LumA	PAM50 LumB	566	207	63180	0.094	0.129	0.123457	ns
BTN3A3	PAM50 LumA	PAM50 Her2	566	82	19794	0.031	0.059	0.0443874	*
BTN3A3	PAM50 LumA	PAM50 Basal	566	194	50372	0.086	0.129	0.113875	ns
BTN3A3	PAM50 Normal	PAM50 LumA	40	566	14250	0.006	0.019	0.00965352	**
BTN3A3	PAM50 Normal	PAM50 LumB	40	207	5420	0.002	0.01	0.00342622	**
BTN3A3	PAM50 Normal	PAM50 Her2	40	82	1782	0.44	0.508	0.493157	ns
BTN3A3	PAM50 Normal	PAM50 Basal	40	194	4279	0.307	0.384	0.359988	ns
BTN3A3	Normal	PAM50 Normal	112	40	2376	0.571	0.612	0.620158	ns
BTN3A3	Normal	PAM50 LumA	112	566	43630	2.96e-10	4.05e-09	1.11383e-09	****
BTN3A3	Normal	PAM50 LumB	112	207	16473	5.4e-10	4.05e-09	1.98242e-09	****
BTN3A3	Normal	PAM50 Her2	112	82	5269	0.08	0.129	0.106382	ns
BTN3A3	Normal	PAM50 Basal	112	194	12747	0.012	0.025	0.0184372	*
C15orf48	PAM50 Her2	PAM50 Basal	82	194	7489	0.443	0.475	0.496137	ns
C15orf48	PAM50 LumB	PAM50 Her2	207	82	10222	0.007	0.013	0.0111332	*
C15orf48	PAM50 LumB	PAM50 Basal	207	194	23053	0.01	0.017	0.0155643	*
C15orf48	PAM50 LumA	PAM50 LumB	566	207	65113	0.018	0.026	0.0268569	*
C15orf48	PAM50 LumA	PAM50 Her2	566	82	30378	6e-06	1.8e-05	1.43586e-05	****
C15orf48	PAM50 LumA	PAM50 Basal	566	194	69018	8.84e-08	3.31e-07	2.55964e-07	****
C15orf48	PAM50 Normal	PAM50 LumA	40	566	9159	0.044	0.059	0.0614789	ns
C15orf48	PAM50 Normal	PAM50 LumB	40	207	3788	0.395	0.456	0.449296	ns
C15orf48	PAM50 Normal	PAM50 Her2	40	82	1843	0.269	0.336	0.319593	ns
C15orf48	PAM50 Normal	PAM50 Basal	40	194	4116	0.546	0.546	0.596195	ns
C15orf48	Normal	PAM50 Normal	112	40	1284	6.39e-05	0.000137	0.00013517	***
C15orf48	Normal	PAM50 LumA	112	566	13642	1.54e-21	2.31e-20	1.36628e-20	****
C15orf48	Normal	PAM50 LumB	112	207	5912	5.08e-13	3.81e-12	2.42209e-12	****
C15orf48	Normal	PAM50 Her2	112	82	3032	5.42e-05	0.000136	0.000115858	***
C15orf48	Normal	PAM50 Basal	112	194	6747	3.37e-08	1.68e-07	1.02509e-07	****
C16orf62	PAM50 Her2	PAM50 Basal	82	194	9183	0.043	0.046	0.0601972	ns
C16orf62	PAM50 LumB	PAM50 Her2	207	82	10356	0.004	0.007	0.00659615	**
C16orf62	PAM50 LumB	PAM50 Basal	207	194	27059	1.77e-09	8.85e-09	6.18331e-09	****
C16orf62	PAM50 LumA	PAM50 LumB	566	207	66429	0.004	0.007	0.00659615	**
C16orf62	PAM50 LumA	PAM50 Her2	566	82	31894	4.17e-08	1.56e-07	1.25272e-07	****
C16orf62	PAM50 LumA	PAM50 Basal	566	194	83426	3.12e-27	4.68e-26	4.04719e-26	****
C16orf62	PAM50 Normal	PAM50 LumA	40	566	6248	2.15e-06	5.38e-06	5.41376e-06	****
C16orf62	PAM50 Normal	PAM50 LumB	40	207	3026	0.007	0.011	0.0111332	*
C16orf62	PAM50 Normal	PAM50 Her2	40	82	1652	0.95	0.95	0.958232	ns
C16orf62	PAM50 Normal	PAM50 Basal	40	194	4704	0.035	0.043	0.049546	*
C16orf62	Normal	PAM50 Normal	112	40	2942	0.003	0.007	0.0050317	**
C16orf62	Normal	PAM50 LumA	112	566	22420	9.71e-07	2.91e-06	2.52813e-06	****
C16orf62	Normal	PAM50 LumB	112	207	9928	0.034	0.043	0.0482399	*
C16orf62	Normal	PAM50 Her2	112	82	5391	0.039	0.045	0.0549057	ns
C16orf62	Normal	PAM50 Basal	112	194	15507	4.76e-10	3.57e-09	1.75485e-09	****
C4orf26	PAM50 Her2	PAM50 Basal	82	194	5981	0.001	0.003	0.00177475	**
C4orf26	PAM50 LumB	PAM50 Her2	207	82	6629.5	0.004	0.007	0.00659615	**
C4orf26	PAM50 LumB	PAM50 Basal	207	194	10782	1.04e-15	7.8e-15	6.1429e-15	****
C4orf26	PAM50 LumA	PAM50 LumB	566	207	64066.5	0.046	0.068	0.0641502	ns
C4orf26	PAM50 LumA	PAM50 Her2	566	82	20324.5	0.068	0.086	0.0917953	ns
C4orf26	PAM50 LumA	PAM50 Basal	566	194	34342	6.2e-15	3.1e-14	3.45191e-14	****
C4orf26	PAM50 Normal	PAM50 LumA	40	566	12965	0.124	0.143	0.158774	ns
C4orf26	PAM50 Normal	PAM50 LumB	40	207	5091	0.021	0.035	0.0309941	*
C4orf26	PAM50 Normal	PAM50 Her2	40	82	1699	0.749	0.749	0.782899	ns
C4orf26	PAM50 Normal	PAM50 Basal	40	194	3125	0.053	0.072	0.073141	ns
C4orf26	Normal	PAM50 Normal	112	40	1509	0.002	0.005	0.00342622	**
C4orf26	Normal	PAM50 LumA	112	566	25634	0.001	0.003	0.00177475	**
C4orf26	Normal	PAM50 LumB	112	207	10497	0.162	0.174	0.202268	ns
C4orf26	Normal	PAM50 Her2	112	82	3032	5.1e-05	0.000191	0.000109663	***
C4orf26	Normal	PAM50 Basal	112	194	4443	6.85e-18	1.03e-16	4.6465e-17	****
C5orf38	PAM50 Her2	PAM50 Basal	82	194	9123	0.054	0.115	0.0744387	ns
C5orf38	PAM50 LumB	PAM50 Her2	207	82	7988	0.436	0.503	0.489239	ns
C5orf38	PAM50 LumB	PAM50 Basal	207	194	21622	0.184	0.307	0.227621	ns
C5orf38	PAM50 LumA	PAM50 LumB	566	207	68603	0.000267	0.002	0.000522391	***
C5orf38	PAM50 LumA	PAM50 Her2	566	82	26371	0.046	0.114	0.0641502	ns
C5orf38	PAM50 LumA	PAM50 Basal	566	194	69097	7.49e-08	1.12e-06	2.19128e-07	****
C5orf38	PAM50 Normal	PAM50 LumA	40	566	10757	0.599	0.642	0.645828	ns
C5orf38	PAM50 Normal	PAM50 LumB	40	207	4801	0.11	0.206	0.142457	ns
C5orf38	PAM50 Normal	PAM50 Her2	40	82	1811	0.352	0.44	0.406047	ns
C5orf38	PAM50 Normal	PAM50 Basal	40	194	4884	0.01	0.038	0.0155643	*
C5orf38	Normal	PAM50 Normal	112	40	1695	0.023	0.068	0.0337462	*
C5orf38	Normal	PAM50 LumA	112	566	25010	0.000416	0.002	0.000792943	***
C5orf38	Normal	PAM50 LumB	112	207	11387	0.795	0.795	0.823097	ns
C5orf38	Normal	PAM50 Her2	112	82	4185	0.293	0.44	0.345194	ns
C5orf38	Normal	PAM50 Basal	112	194	11561	0.35	0.44	0.404167	ns
C5orf56	PAM50 Her2	PAM50 Basal	82	194	7124	0.171	0.197	0.212745	ns
C5orf56	PAM50 LumB	PAM50 Her2	207	82	9961	0.021	0.032	0.0309941	*
C5orf56	PAM50 LumB	PAM50 Basal	207	194	21162	0.351	0.376	0.405107	ns
C5orf56	PAM50 LumA	PAM50 LumB	566	207	71665	1.94e-06	4.16e-06	4.90478e-06	****
C5orf56	PAM50 LumA	PAM50 Her2	566	82	31680	8.88e-08	2.66e-07	2.57037e-07	****
C5orf56	PAM50 LumA	PAM50 Basal	566	194	67503	1.8e-06	4.16e-06	4.57068e-06	****
C5orf56	PAM50 Normal	PAM50 LumA	40	566	10997	0.763	0.763	0.795722	ns
C5orf56	PAM50 Normal	PAM50 LumB	40	207	4925	0.058	0.072	0.079401	ns
C5orf56	PAM50 Normal	PAM50 Her2	40	82	2211	0.002	0.003	0.00342622	**
C5orf56	PAM50 Normal	PAM50 Basal	40	194	4650	0.048	0.066	0.0666412	ns
C5orf56	Normal	PAM50 Normal	112	40	3114	0.000257	0.000482	0.000504069	***
C5orf56	Normal	PAM50 LumA	112	566	43448	5.47e-10	2.05e-09	2.00728e-09	****
C5orf56	Normal	PAM50 LumB	112	207	18439	3.11e-18	4.66e-17	2.1565e-17	****
C5orf56	Normal	PAM50 Her2	112	82	7736	4.05e-16	3.04e-15	2.46903e-15	****
C5orf56	Normal	PAM50 Basal	112	194	16290	3.41e-13	1.7e-12	1.6511e-12	****
C6orf47	PAM50 Her2	PAM50 Basal	82	194	6789	0.055	0.091	0.0756738	ns
C6orf47	PAM50 LumB	PAM50 Her2	207	82	8444	0.947	0.947	0.955537	ns
C6orf47	PAM50 LumB	PAM50 Basal	207	194	17052	0.009	0.019	0.0141059	*
C6orf47	PAM50 LumA	PAM50 LumB	566	207	66896	0.002	0.006	0.00342622	**
C6orf47	PAM50 LumA	PAM50 Her2	566	82	26305	0.051	0.091	0.0705371	ns
C6orf47	PAM50 LumA	PAM50 Basal	566	194	53099	0.495	0.619	0.546868	ns
C6orf47	PAM50 Normal	PAM50 LumA	40	566	10218	0.303	0.413	0.35568	ns
C6orf47	PAM50 Normal	PAM50 LumB	40	207	4288	0.721	0.832	0.757714	ns
C6orf47	PAM50 Normal	PAM50 Her2	40	82	1682	0.821	0.88	0.845902	ns
C6orf47	PAM50 Normal	PAM50 Basal	40	194	3380	0.2	0.3	0.245466	ns
C6orf47	Normal	PAM50 Normal	112	40	1405	0.00048	0.001	0.000906228	***
C6orf47	Normal	PAM50 LumA	112	566	16167	2.42e-16	3.63e-15	1.49305e-15	****
C6orf47	Normal	PAM50 LumB	112	207	8097	8.82e-06	4.41e-05	2.07208e-05	****
C6orf47	Normal	PAM50 Her2	112	82	3147	0.000185	0.000694	0.000368817	***
C6orf47	Normal	PAM50 Basal	112	194	5895	2.66e-11	2e-10	1.09796e-10	****
C9orf66	PAM50 Her2	PAM50 Basal	82	194	10055	0.000528	0.00088	0.000991491	***
C9orf66	PAM50 LumB	PAM50 Her2	207	82	7957	0.408	0.425	0.461977	ns
C9orf66	PAM50 LumB	PAM50 Basal	207	194	23732	0.002	0.002	0.00342622	**
C9orf66	PAM50 LumA	PAM50 LumB	566	207	69950	3.54e-05	7.59e-05	7.74347e-05	****
C9orf66	PAM50 LumA	PAM50 Her2	566	82	26716	0.027	0.034	0.0390896	*
C9orf66	PAM50 LumA	PAM50 Basal	566	194	76393	3.83e-16	1.92e-15	2.34145e-15	****
C9orf66	PAM50 Normal	PAM50 LumA	40	566	12174	0.425	0.425	0.478618	ns
C9orf66	PAM50 Normal	PAM50 LumB	40	207	5248	0.007	0.01	0.0111332	*
C9orf66	PAM50 Normal	PAM50 Her2	40	82	2013	0.042	0.049	0.0588634	ns
C9orf66	PAM50 Normal	PAM50 Basal	40	194	5705	2.87e-06	7.18e-06	7.1038e-06	****
C9orf66	Normal	PAM50 Normal	112	40	3121	0.000229	0.000429	0.000451688	***
C9orf66	Normal	PAM50 LumA	112	566	46006	4.17e-14	1.56e-13	2.17338e-13	****
C9orf66	Normal	PAM50 LumB	112	207	17997	3.78e-16	1.92e-15	2.31412e-15	****
C9orf66	Normal	PAM50 Her2	112	82	7280	3.48e-12	1.04e-11	1.54765e-11	****
C9orf66	Normal	PAM50 Basal	112	194	19088	2.74e-28	4.11e-27	3.76696e-27	****
CACNA2D1	PAM50 Her2	PAM50 Basal	82	194	8571	0.309	0.309	0.36209	ns
CACNA2D1	PAM50 LumB	PAM50 Her2	207	82	9280	0.216	0.231	0.262886	ns
CACNA2D1	PAM50 LumB	PAM50 Basal	207	194	23147	0.008	0.01	0.0126293	*
CACNA2D1	PAM50 LumA	PAM50 LumB	566	207	75815	3.63e-10	9.08e-10	1.35369e-09	****
CACNA2D1	PAM50 LumA	PAM50 Her2	566	82	32766	1.6e-09	3e-09	5.61866e-09	****
CACNA2D1	PAM50 LumA	PAM50 Basal	566	194	75054	2.23e-14	6.69e-14	1.18997e-13	****
CACNA2D1	PAM50 Normal	PAM50 LumA	40	566	13959	0.014	0.016	0.0213001	*
CACNA2D1	PAM50 Normal	PAM50 LumB	40	207	6238	3.97e-07	5.41e-07	1.08171e-06	****
CACNA2D1	PAM50 Normal	PAM50 Her2	40	82	2668	2.1e-08	3.5e-08	6.53117e-08	****
CACNA2D1	PAM50 Normal	PAM50 Basal	40	194	5973	7.97e-08	1.2e-07	2.32237e-07	****
CACNA2D1	Normal	PAM50 Normal	112	40	3697	1.1e-09	2.36e-09	3.91959e-09	****
CACNA2D1	Normal	PAM50 LumA	112	566	55703	8.08e-37	4.04e-36	2.13753e-35	****
CACNA2D1	Normal	PAM50 LumB	112	207	21661	1.53e-37	2.29e-36	4.29482e-36	****
CACNA2D1	Normal	PAM50 Her2	112	82	8964	1.1e-29	4.12e-29	1.673e-28	****
CACNA2D1	Normal	PAM50 Basal	112	194	20336	5.64e-37	4.04e-36	1.51499e-35	****
CAPN8	PAM50 Her2	PAM50 Basal	82	194	13667	4.22e-21	1.58e-20	3.60829e-20	****
CAPN8	PAM50 LumB	PAM50 Her2	207	82	10991	9.27e-05	0.000139	0.000191861	***
CAPN8	PAM50 LumB	PAM50 Basal	207	194	37123	7.01e-49	5.26e-48	5.72753e-47	****
CAPN8	PAM50 LumA	PAM50 LumB	566	207	79483	2.89e-14	6.19e-14	1.52537e-13	****
CAPN8	PAM50 LumA	PAM50 Her2	566	82	36432	6.96e-17	2.09e-16	4.44158e-16	****
CAPN8	PAM50 LumA	PAM50 Basal	566	194	105990	1.68e-83	2.52e-82	2.93328e-80	****
CAPN8	PAM50 Normal	PAM50 LumA	40	566	5897	4.04e-07	6.73e-07	1.1001e-06	****
CAPN8	PAM50 Normal	PAM50 LumB	40	207	3666	0.252	0.291	0.301902	ns
CAPN8	PAM50 Normal	PAM50 Her2	40	82	1931	0.113	0.141	0.145823	ns
CAPN8	PAM50 Normal	PAM50 Basal	40	194	7001	1.2e-15	3e-15	7.0736e-15	****
CAPN8	Normal	PAM50 Normal	112	40	2396	0.515	0.552	0.566883	ns
CAPN8	Normal	PAM50 LumA	112	566	17990	4.6e-13	8.62e-13	2.20164e-12	****
CAPN8	Normal	PAM50 LumB	112	207	11230	0.646	0.646	0.689604	ns
CAPN8	Normal	PAM50 Her2	112	82	5757	0.003	0.004	0.0050317	**
CAPN8	Normal	PAM50 Basal	112	194	19397	2.51e-30	1.25e-29	4.06536e-29	****
CARD11	PAM50 Her2	PAM50 Basal	82	194	8160	0.735	0.787	0.770664	ns
CARD11	PAM50 LumB	PAM50 Her2	207	82	6372	0.000962	0.002	0.00174709	**
CARD11	PAM50 LumB	PAM50 Basal	207	194	16624	0.003	0.005	0.0050317	**
CARD11	PAM50 LumA	PAM50 LumB	566	207	70920	7.18e-06	2.69e-05	1.70237e-05	****
CARD11	PAM50 LumA	PAM50 Her2	566	82	21692	0.339	0.424	0.393128	ns
CARD11	PAM50 LumA	PAM50 Basal	566	194	54200	0.79	0.79	0.818988	ns
CARD11	PAM50 Normal	PAM50 LumA	40	566	15220	0.000269	0.000672	0.000525833	***
CARD11	PAM50 Normal	PAM50 LumB	40	207	6183	7.91e-07	5.93e-06	2.08246e-06	****
CARD11	PAM50 Normal	PAM50 Her2	40	82	2109	0.011	0.014	0.0169935	*
CARD11	PAM50 Normal	PAM50 Basal	40	194	4987	0.005	0.007	0.00814366	**
CARD11	Normal	PAM50 Normal	112	40	979	1.33e-07	2e-06	3.7907e-07	****
CARD11	Normal	PAM50 LumA	112	566	22739	2.26e-06	1.13e-05	5.66623e-06	****
CARD11	Normal	PAM50 LumB	112	207	10913	0.388	0.448	0.442083	ns
CARD11	Normal	PAM50 Her2	112	82	3047	6.39e-05	0.000192	0.00013517	***
CARD11	Normal	PAM50 Basal	112	194	8215	0.000382	0.000819	0.00073165	***
CASC10	PAM50 Her2	PAM50 Basal	82	194	3157	2.47e-15	1.23e-14	1.41956e-14	****
CASC10	PAM50 LumB	PAM50 Her2	207	82	7777	0.268	0.268	0.318752	ns
CASC10	PAM50 LumB	PAM50 Basal	207	194	7407	8.76e-28	6.57e-27	1.17473e-26	****
CASC10	PAM50 LumA	PAM50 LumB	566	207	70505	1.44e-05	1.96e-05	3.29434e-05	****
CASC10	PAM50 LumA	PAM50 Her2	566	82	26495	0.038	0.044	0.0535669	ns
CASC10	PAM50 LumA	PAM50 Basal	566	194	23817	4.97e-32	7.46e-31	9.33077e-31	****
CASC10	PAM50 Normal	PAM50 LumA	40	566	16198	5.17e-06	7.76e-06	1.24371e-05	****
CASC10	PAM50 Normal	PAM50 LumB	40	207	6303	1.72e-07	3.66e-07	4.84374e-07	****
CASC10	PAM50 Normal	PAM50 Her2	40	82	2477	5.06e-06	7.76e-06	1.21792e-05	****
CASC10	PAM50 Normal	PAM50 Basal	40	194	2659	0.002	0.002	0.00342622	**
CASC10	Normal	PAM50 Normal	112	40	1767	0.048	0.051	0.0666412	ns
CASC10	Normal	PAM50 LumA	112	566	42333	1.95e-08	4.87e-08	6.08199e-08	****
CASC10	Normal	PAM50 LumB	112	207	16832	2.67e-11	1e-10	1.10156e-10	****
CASC10	Normal	PAM50 Her2	112	82	6603	1.95e-07	3.66e-07	5.46325e-07	****
CASC10	Normal	PAM50 Basal	112	194	6090	1.53e-10	4.59e-10	5.89188e-10	****
CBWD5	PAM50 Her2	PAM50 Basal	82	194	8637	0.26	0.325	0.310464	ns
CBWD5	PAM50 LumB	PAM50 Her2	207	82	10906	0.000159	0.000397	0.00032057	***
CBWD5	PAM50 LumB	PAM50 Basal	207	194	27317	4.38e-10	2.19e-09	1.62023e-09	****
CBWD5	PAM50 LumA	PAM50 LumB	566	207	61135	0.353	0.407	0.406931	ns
CBWD5	PAM50 LumA	PAM50 Her2	566	82	31306	3.18e-07	9.54e-07	8.75202e-07	****
CBWD5	PAM50 LumA	PAM50 Basal	566	194	78532	3.41e-19	5.12e-18	2.54438e-18	****
CBWD5	PAM50 Normal	PAM50 LumA	40	566	8008	0.002	0.004	0.00342622	**
CBWD5	PAM50 Normal	PAM50 LumB	40	207	3206	0.024	0.045	0.0350837	*
CBWD5	PAM50 Normal	PAM50 Her2	40	82	1764	0.501	0.537	0.552937	ns
CBWD5	PAM50 Normal	PAM50 Basal	40	194	4541	0.09	0.135	0.118668	ns
CBWD5	Normal	PAM50 Normal	112	40	1822	0.081	0.134	0.107614	ns
CBWD5	Normal	PAM50 LumA	112	566	17546	7.96e-14	5.97e-13	4.04251e-13	****
CBWD5	Normal	PAM50 LumB	112	207	7189	2.15e-08	8.06e-08	6.67954e-08	****
CBWD5	Normal	PAM50 Her2	112	82	4105	0.208	0.284	0.253999	ns
CBWD5	Normal	PAM50 Basal	112	194	10707	0.834	0.834	0.858182	ns
CBX2	PAM50 Her2	PAM50 Basal	82	194	6394	0.01	0.012	0.0155643	*
CBX2	PAM50 LumB	PAM50 Her2	207	82	5336	8.7e-07	1.09e-06	2.27534e-06	****
CBX2	PAM50 LumB	PAM50 Basal	207	194	9725	4.4e-19	9.43e-19	3.25525e-18	****
CBX2	PAM50 LumA	PAM50 LumB	566	207	33657	1.23e-19	3.08e-19	9.51098e-19	****
CBX2	PAM50 LumA	PAM50 Her2	566	82	4878	5.99e-31	3e-30	1.02334e-29	****
CBX2	PAM50 LumA	PAM50 Basal	566	194	7904	5.91e-71	8.87e-70	3.22464e-68	****
CBX2	PAM50 Normal	PAM50 LumA	40	566	13971	0.013	0.014	0.0198791	*
CBX2	PAM50 Normal	PAM50 LumB	40	207	3122	0.014	0.014	0.0213001	*
CBX2	PAM50 Normal	PAM50 Her2	40	82	577	6.84e-09	1.03e-08	2.24993e-08	****
CBX2	PAM50 Normal	PAM50 Basal	40	194	888	1.67e-14	3.13e-14	9.0385e-14	****
CBX2	Normal	PAM50 Normal	112	40	942	5.67e-08	7.73e-08	1.67794e-07	****
CBX2	Normal	PAM50 LumA	112	566	20140	1.05e-09	1.75e-09	3.74908e-09	****
CBX2	Normal	PAM50 LumB	112	207	3659	6.2e-24	1.86e-23	6.45895e-23	****
CBX2	Normal	PAM50 Her2	112	82	158	1.73e-30	6.49e-30	2.83889e-29	****
CBX2	Normal	PAM50 Basal	112	194	380	6.59e-45	4.94e-44	3.55128e-43	****
CCDC185	PAM50 Her2	PAM50 Basal	82	194	3538	2.71e-13	2.03e-12	1.32688e-12	****
CCDC185	PAM50 LumB	PAM50 Her2	207	82	10499	0.002	0.002	0.00342622	**
CCDC185	PAM50 LumB	PAM50 Basal	207	194	14662	2.84e-06	7.1e-06	7.03353e-06	****
CCDC185	PAM50 LumA	PAM50 LumB	566	207	56513	0.449	0.518	0.502084	ns
CCDC185	PAM50 LumA	PAM50 Her2	566	82	28246	0.001	0.002	0.00177475	**
CCDC185	PAM50 LumA	PAM50 Basal	566	194	36227	1.18e-12	5.9e-12	5.45625e-12	****
CCDC185	PAM50 Normal	PAM50 LumA	40	566	11575	0.811	0.869	0.837081	ns
CCDC185	PAM50 Normal	PAM50 LumB	40	207	4088	0.9	0.9	0.914562	ns
CCDC185	PAM50 Normal	PAM50 Her2	40	82	2057	0.021	0.027	0.0309941	*
CCDC185	PAM50 Normal	PAM50 Basal	40	194	2474	0.000307	0.000576	0.000597039	***
CCDC185	Normal	PAM50 Normal	112	40	1213	1.11e-05	2.38e-05	2.57652e-05	****
CCDC185	Normal	PAM50 LumA	112	566	19167	2.42e-11	9.08e-11	1.00221e-10	****
CCDC185	Normal	PAM50 LumB	112	207	7040	4.51e-09	1.35e-08	1.50852e-08	****
CCDC185	Normal	PAM50 Her2	112	82	3698	0.017	0.024	0.0255	*
CCDC185	Normal	PAM50 Basal	112	194	3269	1.28e-24	1.92e-23	1.40206e-23	****
CCNYL1	PAM50 Her2	PAM50 Basal	82	194	9082	0.063	0.086	0.0856282	ns
CCNYL1	PAM50 LumB	PAM50 Her2	207	82	3951	1.43e-12	7.15e-12	6.56012e-12	****
CCNYL1	PAM50 LumB	PAM50 Basal	207	194	12496	6.26e-11	1.88e-10	2.49771e-10	****
CCNYL1	PAM50 LumA	PAM50 LumB	566	207	56471	0.443	0.475	0.496137	ns
CCNYL1	PAM50 LumA	PAM50 Her2	566	82	9367	2.45e-18	1.84e-17	1.7221e-17	****
CCNYL1	PAM50 LumA	PAM50 Basal	566	194	31275	3.45e-19	5.18e-18	2.57203e-18	****
CCNYL1	PAM50 Normal	PAM50 LumA	40	566	14948	0.0007	0.002	0.00129416	**
CCNYL1	PAM50 Normal	PAM50 LumB	40	207	5233	0.008	0.014	0.0126293	*
CCNYL1	PAM50 Normal	PAM50 Her2	40	82	1236	0.028	0.042	0.0403766	*
CCNYL1	PAM50 Normal	PAM50 Basal	40	194	3442	0.262	0.302	0.312595	ns
CCNYL1	Normal	PAM50 Normal	112	40	2310	0.771	0.771	0.803298	ns
CCNYL1	Normal	PAM50 LumA	112	566	44852	3.75e-12	1.41e-11	1.66265e-11	****
CCNYL1	Normal	PAM50 LumB	112	207	15637	2.69e-07	6.72e-07	7.45514e-07	****
CCNYL1	Normal	PAM50 Her2	112	82	3445	0.003	0.006	0.0050317	**
CCNYL1	Normal	PAM50 Basal	112	194	9915	0.203	0.254	0.248659	ns
CD40	PAM50 Her2	PAM50 Basal	82	194	6818	0.061	0.061	0.0831169	ns
CD40	PAM50 LumB	PAM50 Her2	207	82	6171	0.0003	0.00045	0.000583816	***
CD40	PAM50 LumB	PAM50 Basal	207	194	12674	1.73e-10	5.19e-10	6.62699e-10	****
CD40	PAM50 LumA	PAM50 LumB	566	207	69706	5.19e-05	8.65e-05	0.000111378	***
CD40	PAM50 LumA	PAM50 Her2	566	82	20110	0.051	0.055	0.0705371	ns
CD40	PAM50 LumA	PAM50 Basal	566	194	40303	3.16e-08	7.9e-08	9.63226e-08	****
CD40	PAM50 Normal	PAM50 LumA	40	566	18576	1.2e-11	4.5e-11	5.11773e-11	****
CD40	PAM50 Normal	PAM50 LumB	40	207	7025	3.1e-12	1.55e-11	1.3843e-11	****
CD40	PAM50 Normal	PAM50 Her2	40	82	2423	1.98e-05	3.71e-05	4.4573e-05	****
CD40	PAM50 Normal	PAM50 Basal	40	194	4868	0.011	0.015	0.0169935	*
CD40	Normal	PAM50 Normal	112	40	1773	0.051	0.055	0.0705371	ns
CD40	Normal	PAM50 LumA	112	566	51149	9.52e-25	1.43e-23	1.06007e-23	****
CD40	Normal	PAM50 LumB	112	207	19365	4.83e-23	3.62e-22	4.70077e-22	****
CD40	Normal	PAM50 Her2	112	82	6355	5.06e-06	1.08e-05	1.21792e-05	****
CD40	Normal	PAM50 Basal	112	194	12566	0.022	0.028	0.0323715	*
CDC42BPG	PAM50 Her2	PAM50 Basal	82	194	6426	0.012	0.018	0.0184372	*
CDC42BPG	PAM50 LumB	PAM50 Her2	207	82	4958	3.6e-08	1.78e-07	1.09011e-07	****
CDC42BPG	PAM50 LumB	PAM50 Basal	207	194	9433	4.38e-20	3.28e-19	3.49839e-19	****
CDC42BPG	PAM50 LumA	PAM50 LumB	566	207	62655	0.138	0.188	0.175158	ns
CDC42BPG	PAM50 LumA	PAM50 Her2	566	82	14554	4.74e-08	1.78e-07	1.41278e-07	****
CDC42BPG	PAM50 LumA	PAM50 Basal	566	194	27537	3.4e-25	5.1e-24	3.88e-24	****
CDC42BPG	PAM50 Normal	PAM50 LumA	40	566	15374	0.000152	0.00038	0.000307167	***
CDC42BPG	PAM50 Normal	PAM50 LumB	40	207	5807	5.61e-05	0.000168	0.000119685	***
CDC42BPG	PAM50 Normal	PAM50 Her2	40	82	1779	0.45	0.519	0.502945	ns
CDC42BPG	PAM50 Normal	PAM50 Basal	40	194	3617	0.501	0.537	0.552937	ns
CDC42BPG	Normal	PAM50 Normal	112	40	1923	0.185	0.231	0.228728	ns
CDC42BPG	Normal	PAM50 LumA	112	566	38064	0.000774	0.001	0.00142163	**
CDC42BPG	Normal	PAM50 LumB	112	207	14326	0.000508	0.001	0.000956197	***
CDC42BPG	Normal	PAM50 Her2	112	82	4453	0.72	0.72	0.757119	ns
CDC42BPG	Normal	PAM50 Basal	112	194	8876	0.008	0.013	0.0126293	*
CDH13	PAM50 Her2	PAM50 Basal	82	194	11148	1.36e-07	2.91e-07	3.86988e-07	****
CDH13	PAM50 LumB	PAM50 Her2	207	82	5938	6.92e-05	9.44e-05	0.000145746	***
CDH13	PAM50 LumB	PAM50 Basal	207	194	23731	0.002	0.002	0.00342622	**
CDH13	PAM50 LumA	PAM50 LumB	566	207	72082	9.06e-07	1.51e-06	2.36313e-06	****
CDH13	PAM50 LumA	PAM50 Her2	566	82	21453	0.269	0.269	0.319593	ns
CDH13	PAM50 LumA	PAM50 Basal	566	194	74714	6.02e-14	1.81e-13	3.09145e-13	****
CDH13	PAM50 Normal	PAM50 LumA	40	566	13873	0.017	0.02	0.0255	*
CDH13	PAM50 Normal	PAM50 LumB	40	207	5903	2.04e-05	3.06e-05	4.58291e-05	****
CDH13	PAM50 Normal	PAM50 Her2	40	82	1913	0.137	0.147	0.173965	ns
CDH13	PAM50 Normal	PAM50 Basal	40	194	5823	6.26e-07	1.17e-06	1.66514e-06	****
CDH13	Normal	PAM50 Normal	112	40	3812	4.85e-11	1.21e-10	1.95568e-10	****
CDH13	Normal	PAM50 LumA	112	566	58000	7.45e-44	1.12e-42	3.5347e-42	****
CDH13	Normal	PAM50 LumB	112	207	22042	2.65e-40	1.99e-39	8.96686e-39	****
CDH13	Normal	PAM50 Her2	112	82	8476	8.94e-24	3.35e-23	9.23624e-23	****
CDH13	Normal	PAM50 Basal	112	194	20226	3.68e-36	1.84e-35	9.20527e-35	****
CDK12	PAM50 Her2	PAM50 Basal	82	194	11889	8.43e-11	4.28e-10	3.31504e-10	****
CDK12	PAM50 LumB	PAM50 Her2	207	82	6571	0.003	0.004	0.0050317	**
CDK12	PAM50 LumB	PAM50 Basal	207	194	28392	7.68e-13	1.15e-11	3.60658e-12	****
CDK12	PAM50 LumA	PAM50 LumB	566	207	41701	8.24e-10	3.09e-09	2.9713e-09	****
CDK12	PAM50 LumA	PAM50 Her2	566	82	13629	1.5e-09	4.5e-09	5.27811e-09	****
CDK12	PAM50 LumA	PAM50 Basal	566	194	64158	0.000452	0.000753	0.000857258	***
CDK12	PAM50 Normal	PAM50 LumA	40	566	8456	0.007	0.01	0.0111332	*
CDK12	PAM50 Normal	PAM50 LumB	40	207	2013	2.74e-07	5.87e-07	7.58168e-07	****
CDK12	PAM50 Normal	PAM50 Her2	40	82	735	8.1e-07	1.52e-06	2.12671e-06	****
CDK12	PAM50 Normal	PAM50 Basal	40	194	3609	0.488	0.488	0.539886	ns
CDK12	Normal	PAM50 Normal	112	40	2543	0.206	0.238	0.251803	ns
CDK12	Normal	PAM50 LumA	112	566	27229	0.018	0.023	0.0268569	*
CDK12	Normal	PAM50 LumB	112	207	6488	8.55e-11	4.28e-10	3.36072e-10	****
CDK12	Normal	PAM50 Her2	112	82	2300	3e-09	7.5e-09	1.02265e-08	****
CDK12	Normal	PAM50 Basal	112	194	11458	0.426	0.456	0.479435	ns
CDK5R1	PAM50 Her2	PAM50 Basal	82	194	5380	2.17e-05	4.07e-05	4.85622e-05	****
CDK5R1	PAM50 LumB	PAM50 Her2	207	82	11075	5.35e-05	8.92e-05	0.000114502	***
CDK5R1	PAM50 LumB	PAM50 Basal	207	194	18841	0.286	0.358	0.337814	ns
CDK5R1	PAM50 LumA	PAM50 LumB	566	207	38580	3.45e-13	1.04e-12	1.66861e-12	****
CDK5R1	PAM50 LumA	PAM50 Her2	566	82	22936	0.865	0.865	0.884245	ns
CDK5R1	PAM50 LumA	PAM50 Basal	566	194	34777	2.42e-14	9.08e-14	1.28664e-13	****
CDK5R1	PAM50 Normal	PAM50 LumA	40	566	10651	0.532	0.589	0.582511	ns
CDK5R1	PAM50 Normal	PAM50 LumB	40	207	2573	0.000153	0.000209	0.000309116	***
CDK5R1	PAM50 Normal	PAM50 Her2	40	82	1530	0.55	0.589	0.599963	ns
CDK5R1	PAM50 Normal	PAM50 Basal	40	194	2361	9.81e-05	0.000147	0.000202462	***
CDK5R1	Normal	PAM50 Normal	112	40	1067	9.3e-07	1.99e-06	2.42428e-06	****
CDK5R1	Normal	PAM50 LumA	112	566	13785	3.17e-21	1.58e-20	2.73459e-20	****
CDK5R1	Normal	PAM50 LumB	112	207	2600	2.78e-30	4.17e-29	4.48603e-29	****
CDK5R1	Normal	PAM50 Her2	112	82	2077	7.57e-11	1.89e-10	2.99574e-10	****
CDK5R1	Normal	PAM50 Basal	112	194	2756	1.53e-27	1.15e-26	2.02992e-26	****
CDKL5	PAM50 Her2	PAM50 Basal	82	194	7796	0.795	0.894	0.823097	ns
CDKL5	PAM50 LumB	PAM50 Her2	207	82	7248	0.053	0.1	0.073141	ns
CDKL5	PAM50 LumB	PAM50 Basal	207	194	16936	0.007	0.019	0.0111332	*
CDKL5	PAM50 LumA	PAM50 LumB	566	207	65941	0.007	0.019	0.0111332	*
CDKL5	PAM50 LumA	PAM50 Her2	566	82	22706	0.753	0.894	0.786609	ns
CDKL5	PAM50 LumA	PAM50 Basal	566	194	52256	0.316	0.474	0.369351	ns
CDKL5	PAM50 Normal	PAM50 LumA	40	566	11569	0.816	0.894	0.841744	ns
CDKL5	PAM50 Normal	PAM50 LumB	40	207	4782	0.121	0.202	0.155251	ns
CDKL5	PAM50 Normal	PAM50 Her2	40	82	1648	0.967	0.967	0.97257	ns
CDKL5	PAM50 Normal	PAM50 Basal	40	194	3798	0.834	0.894	0.858182	ns
CDKL5	Normal	PAM50 Normal	112	40	2814	0.016	0.035	0.0240869	*
CDKL5	Normal	PAM50 LumA	112	566	40281	5.82e-06	4.37e-05	1.39393e-05	****
CDKL5	Normal	PAM50 LumB	112	207	16152	6.68e-09	1e-07	2.20145e-08	****
CDKL5	Normal	PAM50 Her2	112	82	5681	0.005	0.019	0.00814366	**
CDKL5	Normal	PAM50 Basal	112	194	12929	0.006	0.019	0.00965352	**
CDON	PAM50 Her2	PAM50 Basal	82	194	5581	9.03e-05	0.000104	0.000187561	***
CDON	PAM50 LumB	PAM50 Her2	207	82	13846	5.94e-17	1.78e-16	3.80736e-16	****
CDON	PAM50 LumB	PAM50 Basal	207	194	27615	8.2e-11	1.54e-10	3.23042e-10	****
CDON	PAM50 LumA	PAM50 LumB	566	207	70394	1.73e-05	2.16e-05	3.91673e-05	****
CDON	PAM50 LumA	PAM50 Her2	566	82	40970	3.56e-29	1.78e-28	5.26759e-28	****
CDON	PAM50 LumA	PAM50 Basal	566	194	85744	1.48e-31	2.22e-30	2.65306e-30	****
CDON	PAM50 Normal	PAM50 LumA	40	566	6012	7.06e-07	1.18e-06	1.86996e-06	****
CDON	PAM50 Normal	PAM50 LumB	40	207	3182	0.021	0.022	0.0309941	*
CDON	PAM50 Normal	PAM50 Her2	40	82	2502	2.62e-06	3.57e-06	6.51085e-06	****
CDON	PAM50 Normal	PAM50 Basal	40	194	4678	0.041	0.041	0.0575635	ns
CDON	Normal	PAM50 Normal	112	40	4002	1.7e-13	4.25e-13	8.45159e-13	****
CDON	Normal	PAM50 LumA	112	566	41019	8.55e-07	1.28e-06	2.23813e-06	****
CDON	Normal	PAM50 LumB	112	207	17030	4.66e-12	9.99e-12	2.04946e-11	****
CDON	Normal	PAM50 Her2	112	82	8776	2.5e-27	9.38e-27	3.26233e-26	****
CDON	Normal	PAM50 Basal	112	194	19330	7.05e-30	5.29e-29	1.09513e-28	****
CELSR3	PAM50 Her2	PAM50 Basal	82	194	10047	0.000554	0.000755	0.00103697	**
CELSR3	PAM50 LumB	PAM50 Her2	207	82	8901	0.519	0.556	0.570854	ns
CELSR3	PAM50 LumB	PAM50 Basal	207	194	25812	7.72e-07	1.65e-06	2.03735e-06	****
CELSR3	PAM50 LumA	PAM50 LumB	566	207	43462	3.81e-08	1.14e-07	1.15011e-07	****
CELSR3	PAM50 LumA	PAM50 Her2	566	82	17723	0.000539	0.000755	0.00101041	**
CELSR3	PAM50 LumA	PAM50 Basal	566	194	55982	0.682	0.682	0.722644	ns
CELSR3	PAM50 Normal	PAM50 LumA	40	566	9411	0.074	0.093	0.0991589	ns
CELSR3	PAM50 Normal	PAM50 LumB	40	207	2432	3.66e-05	6.86e-05	8.00195e-05	****
CELSR3	PAM50 Normal	PAM50 Her2	40	82	970	0.000261	0.000435	0.00051134	***
CELSR3	PAM50 Normal	PAM50 Basal	40	194	3214	0.088	0.101	0.116259	ns
CELSR3	Normal	PAM50 Normal	112	40	979	1.33e-07	3.33e-07	3.7907e-07	****
CELSR3	Normal	PAM50 LumA	112	566	11424	9.8e-27	9.07e-26	1.23455e-25	****
CELSR3	Normal	PAM50 LumB	112	207	3191	1.21e-26	9.07e-26	1.51554e-25	****
CELSR3	Normal	PAM50 Her2	112	82	1021	2.41e-20	9.04e-20	1.95897e-19	****
CELSR3	Normal	PAM50 Basal	112	194	3546	9.74e-23	4.87e-22	9.27265e-22	****
CES1	PAM50 Her2	PAM50 Basal	82	194	11903	7.23e-11	1.36e-10	2.86379e-10	****
CES1	PAM50 LumB	PAM50 Her2	207	82	5537	4.12e-06	6.18e-06	1.0016e-05	****
CES1	PAM50 LumB	PAM50 Basal	207	194	23515	0.003	0.004	0.0050317	**
CES1	PAM50 LumA	PAM50 LumB	566	207	78131.5	1.15e-12	2.46e-12	5.32317e-12	****
CES1	PAM50 LumA	PAM50 Her2	566	82	23511	0.848	0.848	0.869105	ns
CES1	PAM50 LumA	PAM50 Basal	566	194	80588	2.17e-22	6.51e-22	2.02828e-21	****
CES1	PAM50 Normal	PAM50 LumA	40	566	12540	0.254	0.272	0.303839	ns
CES1	PAM50 Normal	PAM50 LumB	40	207	5935	1.44e-05	1.96e-05	3.29434e-05	****
CES1	PAM50 Normal	PAM50 Her2	40	82	1860	0.231	0.267	0.278964	ns
CES1	PAM50 Normal	PAM50 Basal	40	194	6052	2.54e-08	4.23e-08	7.83541e-08	****
CES1	Normal	PAM50 Normal	112	40	4120	3.72e-15	9.3e-15	2.10881e-14	****
CES1	Normal	PAM50 LumA	112	566	59114	1.7e-47	2.55e-46	1.22653e-45	****
CES1	Normal	PAM50 LumB	112	207	22576	2.41e-44	1.81e-43	1.23037e-42	****
CES1	Normal	PAM50 Her2	112	82	8437	2.48e-23	9.3e-23	2.48855e-22	****
CES1	Normal	PAM50 Basal	112	194	21245	4.6e-44	2.3e-43	2.25607e-42	****
CHID1	PAM50 Her2	PAM50 Basal	82	194	7695	0.67	0.744	0.711569	ns
CHID1	PAM50 LumB	PAM50 Her2	207	82	9396	0.156	0.234	0.195532	ns
CHID1	PAM50 LumB	PAM50 Basal	207	194	21107	0.376	0.484	0.430207	ns
CHID1	PAM50 LumA	PAM50 LumB	566	207	66557	0.004	0.011	0.00659615	**
CHID1	PAM50 LumA	PAM50 Her2	566	82	29781	3.33e-05	0.00025	7.30058e-05	****
CHID1	PAM50 LumA	PAM50 Basal	566	194	65346	7.57e-05	0.000378	0.000158784	***
CHID1	PAM50 Normal	PAM50 LumA	40	566	9071	0.036	0.076	0.0508791	ns
CHID1	PAM50 Normal	PAM50 LumB	40	207	4023	0.778	0.778	0.808949	ns
CHID1	PAM50 Normal	PAM50 Her2	40	82	1799	0.387	0.484	0.441116	ns
CHID1	PAM50 Normal	PAM50 Basal	40	194	4034	0.694	0.744	0.733312	ns
CHID1	Normal	PAM50 Normal	112	40	1713	0.028	0.069	0.0403766	*
CHID1	Normal	PAM50 LumA	112	566	19256	5.1e-11	7.65e-10	2.05081e-10	****
CHID1	Normal	PAM50 LumB	112	207	9130	0.002	0.007	0.00342622	**
CHID1	Normal	PAM50 Her2	112	82	3900	0.074	0.122	0.0991589	ns
CHID1	Normal	PAM50 Basal	112	194	9390	0.048	0.09	0.0666412	ns
CHODL	PAM50 Her2	PAM50 Basal	82	194	1047	4.31e-30	1.29e-29	6.86611e-29	****
CHODL	PAM50 LumB	PAM50 Her2	207	82	7583	0.158	0.158	0.197783	ns
CHODL	PAM50 LumB	PAM50 Basal	207	194	1590	3.33e-57	2.5e-56	7.65024e-55	****
CHODL	PAM50 LumA	PAM50 LumB	566	207	74919	2.8e-09	3.82e-09	9.57462e-09	****
CHODL	PAM50 LumA	PAM50 Her2	566	82	26750	0.025	0.027	0.0364114	*
CHODL	PAM50 LumA	PAM50 Basal	566	194	5460	2.51e-78	3.76e-77	2.4347e-75	****
CHODL	PAM50 Normal	PAM50 LumA	40	566	17894	8.12e-10	1.22e-09	2.93166e-09	****
CHODL	PAM50 Normal	PAM50 LumB	40	207	7007	4.22e-12	7.03e-12	1.86346e-11	****
CHODL	PAM50 Normal	PAM50 Her2	40	82	2612	1.17e-07	1.46e-07	3.35328e-07	****
CHODL	PAM50 Normal	PAM50 Basal	40	194	1030	2.68e-13	5.03e-13	1.31293e-12	****
CHODL	Normal	PAM50 Normal	112	40	3340	4.22e-06	4.87e-06	1.0242e-05	****
CHODL	Normal	PAM50 LumA	112	566	60269	1.99e-51	9.95e-51	2.19908e-49	****
CHODL	Normal	PAM50 LumB	112	207	21967	9.45e-40	3.54e-39	3.0555e-38	****
CHODL	Normal	PAM50 Her2	112	82	8418	4.06e-23	1.01e-22	3.98693e-22	****
CHODL	Normal	PAM50 Basal	112	194	3866	6.27e-21	1.34e-20	5.27332e-20	****
CHST3	PAM50 Her2	PAM50 Basal	82	194	1520	2.49e-26	6.22e-26	3.04024e-25	****
CHST3	PAM50 LumB	PAM50 Her2	207	82	5811	2.95e-05	4.02e-05	6.50341e-05	****
CHST3	PAM50 LumB	PAM50 Basal	207	194	2011	1.04e-54	1.56e-53	1.56538e-52	****
CHST3	PAM50 LumA	PAM50 LumB	566	207	83274	2.65e-19	4.97e-19	2.00125e-18	****
CHST3	PAM50 LumA	PAM50 Her2	566	82	26467	0.04	0.042	0.0562138	ns
CHST3	PAM50 LumA	PAM50 Basal	566	194	14302	2.05e-53	1.02e-52	2.75331e-51	****
CHST3	PAM50 Normal	PAM50 LumA	40	566	20157	1.49e-16	2.48e-16	9.31784e-16	****
CHST3	PAM50 Normal	PAM50 LumB	40	207	8045	3.77e-21	8.08e-21	3.23302e-20	****
CHST3	PAM50 Normal	PAM50 Her2	40	82	3034	2.96e-14	4.44e-14	1.55949e-13	****
CHST3	PAM50 Normal	PAM50 Basal	40	194	3610	0.489	0.489	0.540855	ns
CHST3	Normal	PAM50 Normal	112	40	3016	0.001	0.001	0.00177475	**
CHST3	Normal	PAM50 LumA	112	566	60979	6.33e-54	4.75e-53	8.77157e-52	****
CHST3	Normal	PAM50 LumB	112	207	23013	8.45e-48	3.17e-47	6.35935e-46	****
CHST3	Normal	PAM50 Her2	112	82	8985	5.88e-30	1.76e-29	9.26578e-29	****
CHST3	Normal	PAM50 Basal	112	194	13233	0.001	0.002	0.00177475	**
CLCN3	PAM50 Her2	PAM50 Basal	82	194	11001	4.97e-07	1.86e-06	1.3379e-06	****
CLCN3	PAM50 LumB	PAM50 Her2	207	82	9157	0.296	0.444	0.348353	ns
CLCN3	PAM50 LumB	PAM50 Basal	207	194	29075	8.79e-15	6.59e-14	4.83533e-14	****
CLCN3	PAM50 LumA	PAM50 LumB	566	207	56220	0.391	0.489	0.445269	ns
CLCN3	PAM50 LumA	PAM50 Her2	566	82	24261	0.506	0.584	0.55782	ns
CLCN3	PAM50 LumA	PAM50 Basal	566	194	79666	6.33e-21	9.5e-20	5.31355e-20	****
CLCN3	PAM50 Normal	PAM50 LumA	40	566	7402	0.000252	0.00063	0.000494929	***
CLCN3	PAM50 Normal	PAM50 LumB	40	207	2739	0.00071	0.002	0.00131042	**
CLCN3	PAM50 Normal	PAM50 Her2	40	82	1212	0.02	0.037	0.0296435	*
CLCN3	PAM50 Normal	PAM50 Basal	40	194	4543	0.089	0.149	0.117491	ns
CLCN3	Normal	PAM50 Normal	112	40	3198	6.17e-05	0.000185	0.000130929	***
CLCN3	Normal	PAM50 LumA	112	566	32460	0.687	0.687	0.727147	ns
CLCN3	Normal	PAM50 LumB	112	207	11182	0.603	0.646	0.649179	ns
CLCN3	Normal	PAM50 Her2	112	82	4969	0.33	0.45	0.384018	ns
CLCN3	Normal	PAM50 Basal	112	194	16383	1.34e-13	6.7e-13	6.70768e-13	****
CLCN4	PAM50 Her2	PAM50 Basal	82	194	1635	1.87e-25	5.61e-25	2.17089e-24	****
CLCN4	PAM50 LumB	PAM50 Her2	207	82	4243	3.46e-11	5.77e-11	1.41479e-10	****
CLCN4	PAM50 LumB	PAM50 Basal	207	194	1826	8.47e-56	6.35e-55	1.50904e-53	****
CLCN4	PAM50 LumA	PAM50 LumB	566	207	78793	1.95e-13	3.66e-13	9.65051e-13	****
CLCN4	PAM50 LumA	PAM50 Her2	566	82	18858	0.006	0.006	0.00965352	**
CLCN4	PAM50 LumA	PAM50 Basal	566	194	7928	6.95e-71	1.04e-69	3.56903e-68	****
CLCN4	PAM50 Normal	PAM50 LumA	40	566	17727	2.14e-09	2.92e-09	7.41063e-09	****
CLCN4	PAM50 Normal	PAM50 LumB	40	207	7187	1.78e-13	3.66e-13	8.83925e-13	****
CLCN4	PAM50 Normal	PAM50 Her2	40	82	2331	0.000166	0.000178	0.000333605	***
CLCN4	PAM50 Normal	PAM50 Basal	40	194	1403	2.11e-10	3.16e-10	8.03328e-10	****
CLCN4	Normal	PAM50 Normal	112	40	3295	1.02e-05	1.18e-05	2.37583e-05	****
CLCN4	Normal	PAM50 LumA	112	566	58844	1.34e-46	6.7e-46	8.53883e-45	****
CLCN4	Normal	PAM50 LumB	112	207	22208	1.55e-41	5.81e-41	5.80751e-40	****
CLCN4	Normal	PAM50 Her2	112	82	8123	6.31e-20	1.58e-19	4.97618e-19	****
CLCN4	Normal	PAM50 Basal	112	194	6960	1.64e-07	2.05e-07	4.62591e-07	****
CLDN10	PAM50 Her2	PAM50 Basal	82	194	5871.5	0.00059	0.000738	0.00109917	**
CLDN10	PAM50 LumB	PAM50 Her2	207	82	5151.5	1.8e-07	3.38e-07	5.06087e-07	****
CLDN10	PAM50 LumB	PAM50 Basal	207	194	8188.5	1.07e-24	5.35e-24	1.17794e-23	****
CLDN10	PAM50 LumA	PAM50 LumB	566	207	86369	4.84e-24	1.81e-23	5.09075e-23	****
CLDN10	PAM50 LumA	PAM50 Her2	566	82	25535	0.142	0.142	0.179817	ns
CLDN10	PAM50 LumA	PAM50 Basal	566	194	43972	3.44e-05	5.16e-05	7.53228e-05	****
CLDN10	PAM50 Normal	PAM50 LumA	40	566	16132	6.91e-06	1.15e-05	1.64327e-05	****
CLDN10	PAM50 Normal	PAM50 LumB	40	207	7149	3.11e-13	7.78e-13	1.51339e-12	****
CLDN10	PAM50 Normal	PAM50 Her2	40	82	2381	5.37e-05	7.32e-05	0.000114902	***
CLDN10	PAM50 Normal	PAM50 Basal	40	194	4455	0.141	0.142	0.178603	ns
CLDN10	Normal	PAM50 Normal	112	40	2757	0.031	0.035	0.0443874	*
CLDN10	Normal	PAM50 LumA	112	566	55247	1.68e-35	1.26e-34	4.01819e-34	****
CLDN10	Normal	PAM50 LumB	112	207	22565	2.38e-44	3.57e-43	1.2222e-42	****
CLDN10	Normal	PAM50 Her2	112	82	7999	1.16e-18	3.48e-18	8.31429e-18	****
CLDN10	Normal	PAM50 Basal	112	194	15076	1.62e-08	3.47e-08	5.11117e-08	****
CLDN11	PAM50 Her2	PAM50 Basal	82	194	7526	0.481	0.481	0.532749	ns
CLDN11	PAM50 LumB	PAM50 Her2	207	82	7492	0.12	0.129	0.154036	ns
CLDN11	PAM50 LumB	PAM50 Basal	207	194	17123	0.011	0.012	0.0169935	*
CLDN11	PAM50 LumA	PAM50 LumB	566	207	92236	1.84e-34	6.9e-34	4.12936e-33	****
CLDN11	PAM50 LumA	PAM50 Her2	566	82	35236	3.13e-14	4.7e-14	1.6441e-13	****
CLDN11	PAM50 LumA	PAM50 Basal	566	194	75638	3.91e-15	7.33e-15	2.21364e-14	****
CLDN11	PAM50 Normal	PAM50 LumA	40	566	17814	1.3e-09	1.77e-09	4.6078e-09	****
CLDN11	PAM50 Normal	PAM50 LumB	40	207	7906	8.81e-20	2.2e-19	6.86095e-19	****
CLDN11	PAM50 Normal	PAM50 Her2	40	82	3097	1.97e-15	4.22e-15	1.14121e-14	****
CLDN11	PAM50 Normal	PAM50 Basal	40	194	6867	1.84e-14	3.07e-14	9.92781e-14	****
CLDN11	Normal	PAM50 Normal	112	40	3535	6.08e-08	7.6e-08	1.7938e-07	****
CLDN11	Normal	PAM50 LumA	112	566	59796	8.48e-50	1.27e-48	8.04678e-48	****
CLDN11	Normal	PAM50 LumB	112	207	22932	3.78e-47	2.84e-46	2.57808e-45	****
CLDN11	Normal	PAM50 Her2	112	82	9084	3.02e-31	9.06e-31	5.28349e-30	****
CLDN11	Normal	PAM50 Basal	112	194	20860	5.54e-41	2.77e-40	1.96602e-39	****
CLDND1	PAM50 Her2	PAM50 Basal	82	194	4672	6.12e-08	1.84e-07	1.80499e-07	****
CLDND1	PAM50 LumB	PAM50 Her2	207	82	10093	0.012	0.018	0.0184372	*
CLDND1	PAM50 LumB	PAM50 Basal	207	194	14558	1.94e-06	4.16e-06	4.90478e-06	****
CLDND1	PAM50 LumA	PAM50 LumB	566	207	56162	0.379	0.406	0.433015	ns
CLDND1	PAM50 LumA	PAM50 Her2	566	82	26777	0.024	0.033	0.0350837	*
CLDND1	PAM50 LumA	PAM50 Basal	566	194	37132	1.65e-11	6.19e-11	6.94193e-11	****
CLDND1	PAM50 Normal	PAM50 LumA	40	566	12327	0.347	0.4	0.401339	ns
CLDND1	PAM50 Normal	PAM50 LumB	40	207	4322	0.661	0.661	0.703637	ns
CLDND1	PAM50 Normal	PAM50 Her2	40	82	1993	0.054	0.068	0.0744387	ns
CLDND1	PAM50 Normal	PAM50 Basal	40	194	2904	0.012	0.018	0.0184372	*
CLDND1	Normal	PAM50 Normal	112	40	3442	4.98e-07	1.25e-06	1.34018e-06	****
CLDND1	Normal	PAM50 LumA	112	566	51018	1.95e-24	2.92e-23	2.09908e-23	****
CLDND1	Normal	PAM50 LumB	112	207	17907	9.68e-16	7.26e-15	5.73313e-15	****
CLDND1	Normal	PAM50 Her2	112	82	7543	2.21e-14	1.1e-13	1.18074e-13	****
CLDND1	Normal	PAM50 Basal	112	194	13338	0.000908	0.002	0.00165556	**
CLEC16A	PAM50 Her2	PAM50 Basal	82	194	9138	0.051	0.076	0.0705371	ns
CLEC16A	PAM50 LumB	PAM50 Her2	207	82	8827	0.596	0.73	0.642832	ns
CLEC16A	PAM50 LumB	PAM50 Basal	207	194	23403	0.004	0.01	0.00659615	**
CLEC16A	PAM50 LumA	PAM50 LumB	566	207	70257	2.16e-05	0.000108	4.83632e-05	****
CLEC16A	PAM50 LumA	PAM50 Her2	566	82	29150	0.000176	0.00066	0.000352727	***
CLEC16A	PAM50 LumA	PAM50 Basal	566	194	73726	9.8e-13	1.47e-11	4.56045e-12	****
CLEC16A	PAM50 Normal	PAM50 LumA	40	566	8875	0.022	0.048	0.0323715	*
CLEC16A	PAM50 Normal	PAM50 LumB	40	207	4145	0.991	0.991	0.992592	ns
CLEC16A	PAM50 Normal	PAM50 Her2	40	82	1728	0.633	0.73	0.677134	ns
CLEC16A	PAM50 Normal	PAM50 Basal	40	194	4624	0.056	0.077	0.0768679	ns
CLEC16A	Normal	PAM50 Normal	112	40	1734	0.034	0.064	0.0482399	*
CLEC16A	Normal	PAM50 LumA	112	566	18641	5.47e-12	4.1e-11	2.39124e-11	****
CLEC16A	Normal	PAM50 LumB	112	207	9203	0.002	0.007	0.00342622	**
CLEC16A	Normal	PAM50 Her2	112	82	3791	0.038	0.064	0.0535669	ns
CLEC16A	Normal	PAM50 Basal	112	194	10845	0.98	0.991	0.983379	ns
CLSTN2	PAM50 Her2	PAM50 Basal	82	194	11043	3.46e-07	5.19e-07	9.48079e-07	****
CLSTN2	PAM50 LumB	PAM50 Her2	207	82	14257	2.09e-19	5.22e-19	1.59212e-18	****
CLSTN2	PAM50 LumB	PAM50 Basal	207	194	38038	4.5e-54	3.37e-53	6.33629e-52	****
CLSTN2	PAM50 LumA	PAM50 LumB	566	207	65522	0.012	0.013	0.0184372	*
CLSTN2	PAM50 LumA	PAM50 Her2	566	82	41267	4.21e-30	1.58e-29	6.73137e-29	****
CLSTN2	PAM50 LumA	PAM50 Basal	566	194	107055	6.14e-87	9.21e-86	1.78674e-83	****
CLSTN2	PAM50 Normal	PAM50 LumA	40	566	4538	2.34e-10	4.39e-10	8.88956e-10	****
CLSTN2	PAM50 Normal	PAM50 LumB	40	207	2225	3.69e-06	5.03e-06	9.00075e-06	****
CLSTN2	PAM50 Normal	PAM50 Her2	40	82	2233	0.001	0.002	0.00177475	**
CLSTN2	PAM50 Normal	PAM50 Basal	40	194	6712	3.77e-13	8.08e-13	1.81334e-12	****
CLSTN2	Normal	PAM50 Normal	112	40	3552	4.08e-08	6.8e-08	1.22653e-07	****
CLSTN2	Normal	PAM50 LumA	112	566	28705	0.114	0.122	0.147026	ns
CLSTN2	Normal	PAM50 LumB	112	207	12154	0.475	0.475	0.52704	ns
CLSTN2	Normal	PAM50 Her2	112	82	8190	1.25e-20	3.75e-20	1.03534e-19	****
CLSTN2	Normal	PAM50 Basal	112	194	21337	8.12e-45	4.06e-44	4.34893e-43	****
CLTCL1	PAM50 Her2	PAM50 Basal	82	194	8219	0.662	0.828	0.70453	ns
CLTCL1	PAM50 LumB	PAM50 Her2	207	82	5992	9.83e-05	0.000164	0.000202827	***
CLTCL1	PAM50 LumB	PAM50 Basal	207	194	14978	1.1e-05	2.06e-05	2.55399e-05	****
CLTCL1	PAM50 LumA	PAM50 LumB	566	207	58479	0.971	0.971	0.975919	ns
CLTCL1	PAM50 LumA	PAM50 Her2	566	82	15326	6.58e-07	1.41e-06	1.74706e-06	****
CLTCL1	PAM50 LumA	PAM50 Basal	566	194	39523	5.62e-09	2.11e-08	1.8655e-08	****
CLTCL1	PAM50 Normal	PAM50 LumA	40	566	15428	0.000124	0.000186	0.000253162	***
CLTCL1	PAM50 Normal	PAM50 LumB	40	207	5368	0.003	0.004	0.0050317	**
CLTCL1	PAM50 Normal	PAM50 Her2	40	82	1661	0.911	0.971	0.924341	ns
CLTCL1	PAM50 Normal	PAM50 Basal	40	194	3962	0.834	0.962	0.858182	ns
CLTCL1	Normal	PAM50 Normal	112	40	3472	2.57e-07	6.42e-07	7.13163e-07	****
CLTCL1	Normal	PAM50 LumA	112	566	54966	1.07e-34	1.6e-33	2.45818e-33	****
CLTCL1	Normal	PAM50 LumB	112	207	19025	3.3e-21	2.48e-20	2.83833e-20	****
CLTCL1	Normal	PAM50 Her2	112	82	6813	9.04e-09	2.71e-08	2.93271e-08	****
CLTCL1	Normal	PAM50 Basal	112	194	15643	1.46e-10	7.3e-10	5.62977e-10	****
CNTN1	PAM50 Her2	PAM50 Basal	82	194	10859	1.64e-06	2.73e-06	4.18265e-06	****
CNTN1	PAM50 LumB	PAM50 Her2	207	82	5556	4.75e-06	7.12e-06	1.14614e-05	****
CNTN1	PAM50 LumB	PAM50 Basal	207	194	21193	0.337	0.361	0.391069	ns
CNTN1	PAM50 LumA	PAM50 LumB	566	207	79264	5.33e-14	1.6e-13	2.75657e-13	****
CNTN1	PAM50 LumA	PAM50 Her2	566	82	23116	0.955	0.955	0.962386	ns
CNTN1	PAM50 LumA	PAM50 Basal	566	194	75093	1.99e-14	7.46e-14	1.06778e-13	****
CNTN1	PAM50 Normal	PAM50 LumA	40	566	13251	0.071	0.089	0.0955201	ns
CNTN1	PAM50 Normal	PAM50 LumB	40	207	6372	6.87e-08	1.47e-07	2.01868e-07	****
CNTN1	PAM50 Normal	PAM50 Her2	40	82	1913	0.137	0.158	0.173965	ns
CNTN1	PAM50 Normal	PAM50 Basal	40	194	5935	1.36e-07	2.55e-07	3.86988e-07	****
CNTN1	Normal	PAM50 Normal	112	40	3203	5.64e-05	7.69e-05	0.000120267	***
CNTN1	Normal	PAM50 LumA	112	566	48222	2.65e-18	1.32e-17	1.8567e-17	****
CNTN1	Normal	PAM50 LumB	112	207	20180	9.08e-28	1.36e-26	1.21577e-26	****
CNTN1	Normal	PAM50 Her2	112	82	6916	1.8e-09	4.5e-09	6.28309e-09	****
CNTN1	Normal	PAM50 Basal	112	194	18684	9.81e-26	7.36e-25	1.16045e-24	****
COBLL1	PAM50 Her2	PAM50 Basal	82	194	9740	0.003	0.006	0.0050317	**
COBLL1	PAM50 LumB	PAM50 Her2	207	82	8239	0.699	0.749	0.73797	ns
COBLL1	PAM50 LumB	PAM50 Basal	207	194	24026	0.000668	0.001	0.00123735	**
COBLL1	PAM50 LumA	PAM50 LumB	566	207	64950	0.02	0.031	0.0296435	*
COBLL1	PAM50 LumA	PAM50 Her2	566	82	25012	0.254	0.346	0.303839	ns
COBLL1	PAM50 LumA	PAM50 Basal	566	194	71487	3.28e-10	8.2e-10	1.22894e-09	****
COBLL1	PAM50 Normal	PAM50 LumA	40	566	10639	0.525	0.616	0.576292	ns
COBLL1	PAM50 Normal	PAM50 LumB	40	207	4398	0.534	0.616	0.584554	ns
COBLL1	PAM50 Normal	PAM50 Her2	40	82	1677	0.842	0.842	0.863869	ns
COBLL1	PAM50 Normal	PAM50 Basal	40	194	4871	0.011	0.019	0.0169935	*
COBLL1	Normal	PAM50 Normal	112	40	3979	3.49e-13	1.05e-12	1.68609e-12	****
COBLL1	Normal	PAM50 LumA	112	566	54562	1.46e-33	1.1e-32	3.08615e-32	****
COBLL1	Normal	PAM50 LumB	112	207	20514	7.73e-30	3.86e-29	1.19017e-28	****
COBLL1	Normal	PAM50 Her2	112	82	7910	8.89e-18	3.33e-17	5.98379e-17	****
COBLL1	Normal	PAM50 Basal	112	194	20008	1.42e-34	2.13e-33	3.24518e-33	****
COL4A6	PAM50 Her2	PAM50 Basal	82	194	10039.5	0.00058	0.000669	0.00108169	**
COL4A6	PAM50 LumB	PAM50 Her2	207	82	8006	0.453	0.453	0.506038	ns
COL4A6	PAM50 LumB	PAM50 Basal	207	194	24297	0.000277	0.000378	0.000540624	***
COL4A6	PAM50 LumA	PAM50 LumB	566	207	85768	4.62e-23	1.39e-22	4.50644e-22	****
COL4A6	PAM50 LumA	PAM50 Her2	566	82	33410	1.19e-10	2.17e-10	4.61925e-10	****
COL4A6	PAM50 LumA	PAM50 Basal	566	194	90021	2.07e-40	3.1e-39	7.05902e-39	****
COL4A6	PAM50 Normal	PAM50 LumA	40	566	15029	0.000529	0.000661	0.000992941	***
COL4A6	PAM50 Normal	PAM50 LumB	40	207	6799	1.3e-10	2.17e-10	5.02613e-10	****
COL4A6	PAM50 Normal	PAM50 Her2	40	82	2707	6.01e-09	9.02e-09	1.98966e-08	****
COL4A6	PAM50 Normal	PAM50 Basal	40	194	6928	5.39e-15	1.15e-14	3.01246e-14	****
COL4A6	Normal	PAM50 Normal	112	40	3024	0.001	0.001	0.00177475	**
COL4A6	Normal	PAM50 LumA	112	566	51010	2.03e-24	7.61e-24	2.17714e-23	****
COL4A6	Normal	PAM50 LumB	112	207	20435	2.42e-29	1.21e-28	3.63e-28	****
COL4A6	Normal	PAM50 Her2	112	82	8258	2.35e-21	5.88e-21	2.0536e-20	****
COL4A6	Normal	PAM50 Basal	112	194	20541	1.62e-38	1.22e-37	4.89363e-37	****
COL8A1	PAM50 Her2	PAM50 Basal	82	194	9728	0.003	0.007	0.0050317	**
COL8A1	PAM50 LumB	PAM50 Her2	207	82	7693	0.215	0.248	0.261742	ns
COL8A1	PAM50 LumB	PAM50 Basal	207	194	22888	0.016	0.026	0.0240869	*
COL8A1	PAM50 LumA	PAM50 LumB	566	207	71411	3.06e-06	9.18e-06	7.55054e-06	****
COL8A1	PAM50 LumA	PAM50 Her2	566	82	26118	0.066	0.09	0.0892887	ns
COL8A1	PAM50 LumA	PAM50 Basal	566	194	72913	8.78e-12	6.58e-11	3.78703e-11	****
COL8A1	PAM50 Normal	PAM50 LumA	40	566	8131	0.003	0.007	0.0050317	**
COL8A1	PAM50 Normal	PAM50 LumB	40	207	3798	0.409	0.438	0.462869	ns
COL8A1	PAM50 Normal	PAM50 Her2	40	82	1349	0.113	0.141	0.145823	ns
COL8A1	PAM50 Normal	PAM50 Basal	40	194	4078	0.612	0.612	0.657732	ns
COL8A1	Normal	PAM50 Normal	112	40	1676	0.018	0.028	0.0268569	*
COL8A1	Normal	PAM50 LumA	112	566	13757	2.76e-21	4.14e-20	2.39988e-20	****
COL8A1	Normal	PAM50 LumB	112	207	7250	3.36e-08	1.26e-07	1.02241e-07	****
COL8A1	Normal	PAM50 Her2	112	82	2407	1.56e-08	7.8e-08	4.92721e-08	****
COL8A1	Normal	PAM50 Basal	112	194	8729	0.004	0.008	0.00659615	**
COLCA2	PAM50 Her2	PAM50 Basal	82	194	4647	4.86e-08	7.29e-08	1.44558e-07	****
COLCA2	PAM50 LumB	PAM50 Her2	207	82	6993	0.02	0.023	0.0296435	*
COLCA2	PAM50 LumB	PAM50 Basal	207	194	8828	3.02e-22	1.51e-21	2.78108e-21	****
COLCA2	PAM50 LumA	PAM50 LumB	566	207	74290	1.1e-08	2.06e-08	3.53311e-08	****
COLCA2	PAM50 LumA	PAM50 Her2	566	82	24706.5	0.344	0.369	0.398186	ns
COLCA2	PAM50 LumA	PAM50 Basal	566	194	31623	1.13e-18	3.39e-18	8.11258e-18	****
COLCA2	PAM50 Normal	PAM50 LumA	40	566	18073	2.79e-10	5.98e-10	1.05258e-09	****
COLCA2	PAM50 Normal	PAM50 LumB	40	207	7040	2.4e-12	6e-12	1.07667e-11	****
COLCA2	PAM50 Normal	PAM50 Her2	40	82	2523	1.49e-06	2.03e-06	3.81346e-06	****
COLCA2	PAM50 Normal	PAM50 Basal	40	194	4171	0.456	0.456	0.509064	ns
COLCA2	Normal	PAM50 Normal	112	40	3151	0.000139	0.000174	0.000282137	***
COLCA2	Normal	PAM50 LumA	112	566	60105	7.36e-51	1.1e-49	7.83571e-49	****
COLCA2	Normal	PAM50 LumB	112	207	21772	2.46e-38	1.84e-37	7.27993e-37	****
COLCA2	Normal	PAM50 Her2	112	82	8171	1.98e-20	7.43e-20	1.62304e-19	****
COLCA2	Normal	PAM50 Basal	112	194	14976	3.5e-08	5.83e-08	1.06131e-07	****
COPZ2	PAM50 Her2	PAM50 Basal	82	194	9824	0.002	0.003	0.00342622	**
COPZ2	PAM50 LumB	PAM50 Her2	207	82	6911	0.014	0.017	0.0213001	*
COPZ2	PAM50 LumB	PAM50 Basal	207	194	21236	0.319	0.319	0.372408	ns
COPZ2	PAM50 LumA	PAM50 LumB	566	207	80425	1.93e-15	7.24e-15	1.11878e-14	****
COPZ2	PAM50 LumA	PAM50 Her2	566	82	28036	0.002	0.003	0.00342622	**
COPZ2	PAM50 LumA	PAM50 Basal	566	194	77903	2.88e-18	1.44e-17	2.00818e-17	****
COPZ2	PAM50 Normal	PAM50 LumA	40	566	12408	0.31	0.319	0.363164	ns
COPZ2	PAM50 Normal	PAM50 LumB	40	207	6100	2.17e-06	4.07e-06	5.45782e-06	****
COPZ2	PAM50 Normal	PAM50 Her2	40	82	2158	0.005	0.007	0.00814366	**
COPZ2	PAM50 Normal	PAM50 Basal	40	194	5864	3.62e-07	7.76e-07	9.90056e-07	****
COPZ2	Normal	PAM50 Normal	112	40	2807	0.018	0.021	0.0268569	*
COPZ2	Normal	PAM50 LumA	112	566	42178	3.12e-08	7.8e-08	9.52031e-08	****
COPZ2	Normal	PAM50 LumB	112	207	18831	3.39e-20	2.54e-19	2.73266e-19	****
COPZ2	Normal	PAM50 Her2	112	82	6908	2.05e-09	6.15e-09	7.11308e-09	****
COPZ2	Normal	PAM50 Basal	112	194	17975	1.47e-21	2.2e-20	1.30683e-20	****
CORO6	PAM50 Her2	PAM50 Basal	82	194	9762	0.003	0.004	0.0050317	**
CORO6	PAM50 LumB	PAM50 Her2	207	82	9563	0.093	0.116	0.122309	ns
CORO6	PAM50 LumB	PAM50 Basal	207	194	27577	1.02e-10	5.1e-10	3.98416e-10	****
CORO6	PAM50 LumA	PAM50 LumB	566	207	67530	0.001	0.002	0.00177475	**
CORO6	PAM50 LumA	PAM50 Her2	566	82	29483	7.44e-05	0.000159	0.000156208	***
CORO6	PAM50 LumA	PAM50 Basal	566	194	84166	1.41e-28	2.12e-27	1.9918e-27	****
CORO6	PAM50 Normal	PAM50 LumA	40	566	9518	0.092	0.116	0.121122	ns
CORO6	PAM50 Normal	PAM50 LumB	40	207	4272	0.751	0.751	0.784707	ns
CORO6	PAM50 Normal	PAM50 Her2	40	82	1935	0.108	0.125	0.140137	ns
CORO6	PAM50 Normal	PAM50 Basal	40	194	5772	1.22e-06	4.58e-06	3.14548e-06	****
CORO6	Normal	PAM50 Normal	112	40	2988	0.002	0.003	0.00342622	**
CORO6	Normal	PAM50 LumA	112	566	34331	0.164	0.176	0.204619	ns
CORO6	Normal	PAM50 LumB	112	207	14895	2.67e-05	6.68e-05	5.91301e-05	****
CORO6	Normal	PAM50 Her2	112	82	6419	2.27e-06	6.81e-06	5.68803e-06	****
CORO6	Normal	PAM50 Basal	112	194	19012	8.48e-28	6.36e-27	1.13893e-26	****
CPNE4	PAM50 Her2	PAM50 Basal	82	194	8435	0.428	0.535	0.481438	ns
CPNE4	PAM50 LumB	PAM50 Her2	207	82	6922	0.015	0.027	0.0227068	*
CPNE4	PAM50 LumB	PAM50 Basal	207	194	17161	0.012	0.025	0.0184372	*
CPNE4	PAM50 LumA	PAM50 LumB	566	207	60032.5	0.597	0.689	0.643831	ns
CPNE4	PAM50 LumA	PAM50 Her2	566	82	18796	0.005	0.013	0.00814366	**
CPNE4	PAM50 LumA	PAM50 Basal	566	194	45799	0.00056	0.002	0.00104685	**
CPNE4	PAM50 Normal	PAM50 LumA	40	566	11619.5	0.78	0.78	0.810739	ns
CPNE4	PAM50 Normal	PAM50 LumB	40	207	4259.5	0.773	0.78	0.804997	ns
CPNE4	PAM50 Normal	PAM50 Her2	40	82	1270	0.044	0.066	0.0614789	ns
CPNE4	PAM50 Normal	PAM50 Basal	40	194	3131	0.055	0.075	0.0756738	ns
CPNE4	Normal	PAM50 Normal	112	40	3658	3.01e-09	1.5e-08	1.02566e-08	****
CPNE4	Normal	PAM50 LumA	112	566	47536	6.02e-17	9.03e-16	3.85298e-16	****
CPNE4	Normal	PAM50 LumB	112	207	16328	1.69e-09	1.27e-08	5.92043e-09	****
CPNE4	Normal	PAM50 Her2	112	82	5509	0.018	0.03	0.0268569	*
CPNE4	Normal	PAM50 Basal	112	194	14402	2.09e-06	7.84e-06	5.2718e-06	****
CPS1	PAM50 Her2	PAM50 Basal	82	194	8458	0.406	0.435	0.46001	ns
CPS1	PAM50 LumB	PAM50 Her2	207	82	8562	0.907	0.907	0.920925	ns
CPS1	PAM50 LumB	PAM50 Basal	207	194	21509	0.218	0.252	0.264914	ns
CPS1	PAM50 LumA	PAM50 LumB	566	207	73343	7.88e-08	1.97e-07	2.29768e-07	****
CPS1	PAM50 LumA	PAM50 Her2	566	82	29077	0.000211	0.000264	0.000418073	***
CPS1	PAM50 LumA	PAM50 Basal	566	194	68947	1.02e-07	2.19e-07	2.93784e-07	****
CPS1	PAM50 Normal	PAM50 LumA	40	566	15589	6.64e-05	9.05e-05	0.000140255	***
CPS1	PAM50 Normal	PAM50 LumB	40	207	6370	7.06e-08	1.97e-07	2.07172e-07	****
CPS1	PAM50 Normal	PAM50 Her2	40	82	2514	1.9e-06	2.85e-06	4.81201e-06	****
CPS1	PAM50 Normal	PAM50 Basal	40	194	5767	1.3e-06	2.17e-06	3.34384e-06	****
CPS1	Normal	PAM50 Normal	112	40	3457	3.58e-07	6.71e-07	9.7973e-07	****
CPS1	Normal	PAM50 LumA	112	566	57787	3.56e-43	5.34e-42	1.58565e-41	****
CPS1	Normal	PAM50 LumB	112	207	21092	1.32e-33	9.9e-33	2.8038e-32	****
CPS1	Normal	PAM50 Her2	112	82	8226	5.18e-21	1.94e-20	4.39043e-20	****
CPS1	Normal	PAM50 Basal	112	194	18584	4.02e-25	2.01e-24	4.54005e-24	****
CRAT	PAM50 Her2	PAM50 Basal	82	194	14935	1.05e-30	7.88e-30	1.75268e-29	****
CRAT	PAM50 LumB	PAM50 Her2	207	82	4982	4.46e-08	8.36e-08	1.33342e-07	****
CRAT	PAM50 LumB	PAM50 Basal	207	194	30994	4.96e-21	2.48e-20	4.20805e-20	****
CRAT	PAM50 LumA	PAM50 LumB	566	207	68992	0.000152	0.000207	0.000307167	***
CRAT	PAM50 LumA	PAM50 Her2	566	82	16811	5.44e-05	8.16e-05	0.000116229	***
CRAT	PAM50 LumA	PAM50 Basal	566	194	95314	6.15e-53	9.22e-52	7.78109e-51	****
CRAT	PAM50 Normal	PAM50 LumA	40	566	7844	0.001	0.001	0.00177475	**
CRAT	PAM50 Normal	PAM50 LumB	40	207	3864	0.505	0.505	0.556859	ns
CRAT	PAM50 Normal	PAM50 Her2	40	82	749	1.19e-06	1.98e-06	3.07085e-06	****
CRAT	PAM50 Normal	PAM50 Basal	40	194	6240	1.42e-09	3.04e-09	5.01684e-09	****
CRAT	Normal	PAM50 Normal	112	40	1976	0.27	0.289	0.320694	ns
CRAT	Normal	PAM50 LumA	112	566	16604	1.61e-15	4.02e-15	9.40783e-15	****
CRAT	Normal	PAM50 LumB	112	207	9371	0.005	0.005	0.00814366	**
CRAT	Normal	PAM50 Her2	112	82	1315	2.23e-17	6.69e-17	1.45827e-16	****
CRAT	Normal	PAM50 Basal	112	194	17491	6.23e-19	2.34e-18	4.54748e-18	****
CREB3L1	PAM50 Her2	PAM50 Basal	82	194	14771	2.35e-29	1.02e-28	3.53107e-28	****
CREB3L1	PAM50 LumB	PAM50 Her2	207	82	4926	2.71e-08	4.52e-08	8.34508e-08	****
CREB3L1	PAM50 LumB	PAM50 Basal	207	194	31512	6.41e-23	1.6e-22	6.18335e-22	****
CREB3L1	PAM50 LumA	PAM50 LumB	566	207	69875	3.99e-05	5.98e-05	8.68863e-05	****
CREB3L1	PAM50 LumA	PAM50 Her2	566	82	17043	0.0001	0.000136	0.000205993	***
CREB3L1	PAM50 LumA	PAM50 Basal	566	194	95485	2.26e-53	3.39e-52	2.98936e-51	****
CREB3L1	PAM50 Normal	PAM50 LumA	40	566	9338	0.064	0.069	0.0867712	ns
CREB3L1	PAM50 Normal	PAM50 LumB	40	207	4207	0.872	0.872	0.890566	ns
CREB3L1	PAM50 Normal	PAM50 Her2	40	82	977	0.000302	0.000378	0.000587447	***
CREB3L1	PAM50 Normal	PAM50 Basal	40	194	6106	1.14e-08	2.14e-08	3.65218e-08	****
CREB3L1	Normal	PAM50 Normal	112	40	631	1.69e-11	3.62e-11	7.10337e-11	****
CREB3L1	Normal	PAM50 LumA	112	566	4418	4.98e-47	3.73e-46	3.31873e-45	****
CREB3L1	Normal	PAM50 LumB	112	207	3292	4.8e-26	1.44e-25	5.78785e-25	****
CREB3L1	Normal	PAM50 Her2	112	82	251	2.73e-29	1.02e-28	4.06705e-28	****
CREB3L1	Normal	PAM50 Basal	112	194	9070	0.016	0.019	0.0240869	*
CSF2	PAM50 Her2	PAM50 Basal	82	194	5596	9.25e-05	0.000347	0.000191538	***
CSF2	PAM50 LumB	PAM50 Her2	207	82	6427	0.000885	0.002	0.00161531	**
CSF2	PAM50 LumB	PAM50 Basal	207	194	9603	4.96e-20	3.72e-19	3.9472e-19	****
CSF2	PAM50 LumA	PAM50 LumB	566	207	58546	0.99	0.99	0.991932	ns
CSF2	PAM50 LumA	PAM50 Her2	566	82	17577	0.000208	0.000624	0.000412316	***
CSF2	PAM50 LumA	PAM50 Basal	566	194	26270	6.31e-29	9.46e-28	9.07517e-28	****
CSF2	PAM50 Normal	PAM50 LumA	40	566	14132	0.006	0.011	0.00965352	**
CSF2	PAM50 Normal	PAM50 LumB	40	207	5159	0.011	0.018	0.0169935	*
CSF2	PAM50 Normal	PAM50 Her2	40	82	1658	0.923	0.989	0.934995	ns
CSF2	PAM50 Normal	PAM50 Basal	40	194	2735	0.003	0.007	0.0050317	**
CSF2	Normal	PAM50 Normal	112	40	1929	0.181	0.209	0.224164	ns
CSF2	Normal	PAM50 LumA	112	566	35076	0.062	0.093	0.0842953	ns
CSF2	Normal	PAM50 LumB	112	207	12820	0.104	0.142	0.135268	ns
CSF2	Normal	PAM50 Her2	112	82	4008	0.121	0.151	0.155251	ns
CSF2	Normal	PAM50 Basal	112	194	6467.5	2.75e-09	1.38e-08	9.41102e-09	****
CTA-126B4.7	PAM50 Her2	PAM50 Basal	82	194	7385	0.348	0.373	0.402283	ns
CTA-126B4.7	PAM50 LumB	PAM50 Her2	207	82	6089	0.000182	0.000341	0.00036375	***
CTA-126B4.7	PAM50 LumB	PAM50 Basal	207	194	12618	1.26e-10	3.78e-10	4.87796e-10	****
CTA-126B4.7	PAM50 LumA	PAM50 LumB	566	207	66394	0.004	0.007	0.00659615	**
CTA-126B4.7	PAM50 LumA	PAM50 Her2	566	82	19133	0.01	0.014	0.0155643	*
CTA-126B4.7	PAM50 LumA	PAM50 Basal	566	194	39828	1.12e-08	2.8e-08	3.59338e-08	****
CTA-126B4.7	PAM50 Normal	PAM50 LumA	40	566	11279	0.97	0.97	0.975026	ns
CTA-126B4.7	PAM50 Normal	PAM50 LumB	40	207	4680	0.192	0.222	0.236612	ns
CTA-126B4.7	PAM50 Normal	PAM50 Her2	40	82	1353	0.118	0.148	0.151759	ns
CTA-126B4.7	PAM50 Normal	PAM50 Basal	40	194	2847	0.008	0.012	0.0126293	*
CTA-126B4.7	Normal	PAM50 Normal	112	40	933	4.54e-08	9.73e-08	1.35641e-07	****
CTA-126B4.7	Normal	PAM50 LumA	112	566	12929	3.8e-23	2.85e-22	3.74002e-22	****
CTA-126B4.7	Normal	PAM50 LumB	112	207	5969	8.59e-13	3.22e-12	4.01879e-12	****
CTA-126B4.7	Normal	PAM50 Her2	112	82	1519	1.8e-15	9e-15	1.04551e-14	****
CTA-126B4.7	Normal	PAM50 Basal	112	194	3274	2.42e-24	3.63e-23	2.58271e-23	****
CTC-260E6.6	PAM50 Her2	PAM50 Basal	82	194	7390	0.352	0.406	0.406047	ns
CTC-260E6.6	PAM50 LumB	PAM50 Her2	207	82	8021	0.467	0.5	0.519352	ns
CTC-260E6.6	PAM50 LumB	PAM50 Basal	207	194	17505	0.026	0.033	0.0377419	*
CTC-260E6.6	PAM50 LumA	PAM50 LumB	566	207	42577	5.83e-09	2.19e-08	1.93153e-08	****
CTC-260E6.6	PAM50 LumA	PAM50 Her2	566	82	17432	0.000268	0.000574	0.000523996	***
CTC-260E6.6	PAM50 LumA	PAM50 Basal	566	194	35882	5.7e-13	2.85e-12	2.70734e-12	****
CTC-260E6.6	PAM50 Normal	PAM50 LumA	40	566	11057	0.806	0.806	0.832314	ns
CTC-260E6.6	PAM50 Normal	PAM50 LumB	40	207	2960	0.004	0.007	0.00659615	**
CTC-260E6.6	PAM50 Normal	PAM50 Her2	40	82	1219	0.022	0.03	0.0323715	*
CTC-260E6.6	PAM50 Normal	PAM50 Basal	40	194	2526	0.000517	0.000969	0.000972299	***
CTC-260E6.6	Normal	PAM50 Normal	112	40	1631	0.011	0.016	0.0169935	*
CTC-260E6.6	Normal	PAM50 LumA	112	566	22489	1.17e-06	2.92e-06	3.02282e-06	****
CTC-260E6.6	Normal	PAM50 LumB	112	207	5697	6.55e-14	4.91e-13	3.35769e-13	****
CTC-260E6.6	Normal	PAM50 Her2	112	82	2591	2.24e-07	6.72e-07	6.24567e-07	****
CTC-260E6.6	Normal	PAM50 Basal	112	194	4987	3.22e-15	4.83e-14	1.8349e-14	****
CTC-360G5.9	PAM50 Her2	PAM50 Basal	82	194	2513	2.76e-19	1.04e-18	2.08073e-18	****
CTC-360G5.9	PAM50 LumB	PAM50 Her2	207	82	11075.5	5.33e-05	8e-05	0.00011413	***
CTC-360G5.9	PAM50 LumB	PAM50 Basal	207	194	11004	5.13e-15	1.28e-14	2.87636e-14	****
CTC-360G5.9	PAM50 LumA	PAM50 LumB	566	207	64101.5	0.045	0.051	0.0628258	ns
CTC-360G5.9	PAM50 LumA	PAM50 Her2	566	82	33643.5	4.47e-11	9.58e-11	1.80998e-10	****
CTC-360G5.9	PAM50 LumA	PAM50 Basal	566	194	32352	1.28e-17	3.84e-17	8.52357e-17	****
CTC-360G5.9	PAM50 Normal	PAM50 LumA	40	566	15583	6.8e-05	9.27e-05	0.000143287	***
CTC-360G5.9	PAM50 Normal	PAM50 LumB	40	207	5856	3.37e-05	5.62e-05	7.38642e-05	****
CTC-360G5.9	PAM50 Normal	PAM50 Her2	40	82	2786	4.17e-10	7.82e-10	1.54582e-09	****
CTC-360G5.9	PAM50 Normal	PAM50 Basal	40	194	3464	0.286	0.286	0.337814	ns
CTC-360G5.9	Normal	PAM50 Normal	112	40	2919	0.005	0.006	0.00814366	**
CTC-360G5.9	Normal	PAM50 LumA	112	566	52846	5.91e-29	8.87e-28	8.5421e-28	****
CTC-360G5.9	Normal	PAM50 LumB	112	207	19395	3.3e-23	1.65e-22	3.26633e-22	****
CTC-360G5.9	Normal	PAM50 Her2	112	82	8705	1.83e-26	1.37e-25	2.26609e-25	****
CTC-360G5.9	Normal	PAM50 Basal	112	194	12109	0.095	0.102	0.124527	ns
CTC-459F4.3	PAM50 Her2	PAM50 Basal	82	194	4119	2.49e-10	9.34e-10	9.43067e-10	****
CTC-459F4.3	PAM50 LumB	PAM50 Her2	207	82	9211	0.259	0.353	0.309312	ns
CTC-459F4.3	PAM50 LumB	PAM50 Basal	207	194	11414	8e-14	6e-13	4.06047e-13	****
CTC-459F4.3	PAM50 LumA	PAM50 LumB	566	207	66970	0.002	0.004	0.00342622	**
CTC-459F4.3	PAM50 LumA	PAM50 Her2	566	82	28845	0.000372	0.000797	0.000713749	***
CTC-459F4.3	PAM50 LumA	PAM50 Basal	566	194	35933	6.56e-13	3.28e-12	3.09896e-12	****
CTC-459F4.3	PAM50 Normal	PAM50 LumA	40	566	8294	0.005	0.008	0.00814366	**
CTC-459F4.3	PAM50 Normal	PAM50 LumB	40	207	3810	0.426	0.532	0.479435	ns
CTC-459F4.3	PAM50 Normal	PAM50 Her2	40	82	1669	0.876	0.933	0.893919	ns
CTC-459F4.3	PAM50 Normal	PAM50 Basal	40	194	1785	7.75e-08	2.32e-07	2.26431e-07	****
CTC-459F4.3	Normal	PAM50 Normal	112	40	2154	0.721	0.832	0.757714	ns
CTC-459F4.3	Normal	PAM50 LumA	112	566	22573	1.46e-06	3.65e-06	3.73887e-06	****
CTC-459F4.3	Normal	PAM50 LumB	112	207	10357	0.116	0.174	0.149385	ns
CTC-459F4.3	Normal	PAM50 Her2	112	82	4559	0.933	0.933	0.944139	ns
CTC-459F4.3	Normal	PAM50 Basal	112	194	4800	4.2e-16	6.3e-15	2.5569e-15	****
CTD-2194D22.3	PAM50 Her2	PAM50 Basal	82	194	9077	0.061	0.083	0.0831169	ns
CTD-2194D22.3	PAM50 LumB	PAM50 Her2	207	82	5420	8.92e-07	4.46e-06	2.33149e-06	****
CTD-2194D22.3	PAM50 LumB	PAM50 Basal	207	194	14970	6.27e-06	1.88e-05	1.49678e-05	****
CTD-2194D22.3	PAM50 LumA	PAM50 LumB	566	207	71736.5	1.31e-06	4.91e-06	3.36758e-06	****
CTD-2194D22.3	PAM50 LumA	PAM50 Her2	566	82	18143	0.001	0.002	0.00177475	**
CTD-2194D22.3	PAM50 LumA	PAM50 Basal	566	194	48228	0.011	0.016	0.0169935	*
CTD-2194D22.3	PAM50 Normal	PAM50 LumA	40	566	15988.5	1.17e-05	2.92e-05	2.71075e-05	****
CTD-2194D22.3	PAM50 Normal	PAM50 LumB	40	207	6250.5	1.62e-07	1.22e-06	4.57245e-07	****
CTD-2194D22.3	PAM50 Normal	PAM50 Her2	40	82	1653	0.946	0.995	0.954639	ns
CTD-2194D22.3	PAM50 Normal	PAM50 Basal	40	194	4481	0.12	0.15	0.154036	ns
CTD-2194D22.3	Normal	PAM50 Normal	112	40	1631	0.011	0.016	0.0169935	*
CTD-2194D22.3	Normal	PAM50 LumA	112	566	39097	8.69e-05	0.000186	0.000180929	***
CTD-2194D22.3	Normal	PAM50 LumB	112	207	16265	1.55e-09	2.32e-08	5.44746e-09	****
CTD-2194D22.3	Normal	PAM50 Her2	112	82	4141	0.243	0.28	0.291961	ns
CTD-2194D22.3	Normal	PAM50 Basal	112	194	10859	0.995	0.995	0.995798	ns
CTD-2201E18.3	PAM50 Her2	PAM50 Basal	82	194	5710	0.000214	0.000401	0.000423729	***
CTD-2201E18.3	PAM50 LumB	PAM50 Her2	207	82	7417	0.095	0.109	0.124527	ns
CTD-2201E18.3	PAM50 LumB	PAM50 Basal	207	194	10546	2.06e-16	1.54e-15	1.27545e-15	****
CTD-2201E18.3	PAM50 LumA	PAM50 LumB	566	207	77880	2.22e-12	8.32e-12	9.98485e-12	****
CTD-2201E18.3	PAM50 LumA	PAM50 Her2	566	82	26296	0.051	0.064	0.0705371	ns
CTD-2201E18.3	PAM50 LumA	PAM50 Basal	566	194	41335	2.73e-07	5.85e-07	7.5564e-07	****
CTD-2201E18.3	PAM50 Normal	PAM50 LumA	40	566	13925	0.015	0.022	0.0227068	*
CTD-2201E18.3	PAM50 Normal	PAM50 LumB	40	207	6318	1.41e-07	3.52e-07	4.00172e-07	****
CTD-2201E18.3	PAM50 Normal	PAM50 Her2	40	82	2119	0.009	0.015	0.0141059	*
CTD-2201E18.3	PAM50 Normal	PAM50 Basal	40	194	3492	0.32	0.343	0.373326	ns
CTD-2201E18.3	Normal	PAM50 Normal	112	40	2783	0.023	0.032	0.0337462	*
CTD-2201E18.3	Normal	PAM50 LumA	112	566	46783	1.64e-15	8.2e-15	9.57032e-15	****
CTD-2201E18.3	Normal	PAM50 LumB	112	207	19903	4.13e-26	6.2e-25	5.00068e-25	****
CTD-2201E18.3	Normal	PAM50 Her2	112	82	6651	9.9e-08	2.97e-07	2.85426e-07	****
CTD-2201E18.3	Normal	PAM50 Basal	112	194	11451	0.431	0.431	0.484376	ns
CTD-2269F5.1	PAM50 Her2	PAM50 Basal	82	194	8859.5	0.135	0.156	0.17175	ns
CTD-2269F5.1	PAM50 LumB	PAM50 Her2	207	82	8145	0.594	0.594	0.64115	ns
CTD-2269F5.1	PAM50 LumB	PAM50 Basal	207	194	21975	0.102	0.128	0.132944	ns
CTD-2269F5.1	PAM50 LumA	PAM50 LumB	566	207	70667	1.1e-05	3.3e-05	2.55399e-05	****
CTD-2269F5.1	PAM50 LumA	PAM50 Her2	566	82	26982.5	0.017	0.026	0.0255	*
CTD-2269F5.1	PAM50 LumA	PAM50 Basal	566	194	69453.5	3.5e-08	1.75e-07	1.06131e-07	****
CTD-2269F5.1	PAM50 Normal	PAM50 LumA	40	566	13271.5	0.068	0.093	0.0917953	ns
CTD-2269F5.1	PAM50 Normal	PAM50 LumB	40	207	5646	0.000273	0.000512	0.000533055	***
CTD-2269F5.1	PAM50 Normal	PAM50 Her2	40	82	2177.5	0.003	0.006	0.0050317	**
CTD-2269F5.1	PAM50 Normal	PAM50 Basal	40	194	5439.5	6.35e-05	0.000136	0.000134422	***
CTD-2269F5.1	Normal	PAM50 Normal	112	40	2389	0.534	0.572	0.584554	ns
CTD-2269F5.1	Normal	PAM50 LumA	112	566	39808	1.84e-05	4.6e-05	4.15284e-05	****
CTD-2269F5.1	Normal	PAM50 LumB	112	207	16569	2.46e-10	3.19e-09	9.32514e-10	****
CTD-2269F5.1	Normal	PAM50 Her2	112	82	6425	2.1e-06	7.88e-06	5.29549e-06	****
CTD-2269F5.1	Normal	PAM50 Basal	112	194	15520	4.25e-10	3.19e-09	1.57281e-09	****
CTR9	PAM50 Her2	PAM50 Basal	82	194	9699	0.004	0.005	0.00659615	**
CTR9	PAM50 LumB	PAM50 Her2	207	82	12607	1.26e-10	3.78e-10	4.87796e-10	****
CTR9	PAM50 LumB	PAM50 Basal	207	194	32673	1.83e-27	1.37e-26	2.39878e-26	****
CTR9	PAM50 LumA	PAM50 LumB	566	207	53002	0.042	0.045	0.0588634	ns
CTR9	PAM50 LumA	PAM50 Her2	566	82	33437	1.07e-10	3.78e-10	4.17013e-10	****
CTR9	PAM50 LumA	PAM50 Basal	566	194	88183	1.82e-36	2.73e-35	4.65941e-35	****
CTR9	PAM50 Normal	PAM50 LumA	40	566	5989	6.32e-07	1.35e-06	1.68007e-06	****
CTR9	PAM50 Normal	PAM50 LumB	40	207	2051	4.45e-07	1.11e-06	1.20498e-06	****
CTR9	PAM50 Normal	PAM50 Her2	40	82	1717	0.677	0.677	0.717868	ns
CTR9	PAM50 Normal	PAM50 Basal	40	194	4931	0.007	0.008	0.0111332	*
CTR9	Normal	PAM50 Normal	112	40	3058	0.000625	0.000852	0.00116189	**
CTR9	Normal	PAM50 LumA	112	566	25087	0.000484	0.000726	0.000913385	***
CTR9	Normal	PAM50 LumB	112	207	8240	2.02e-05	3.79e-05	4.53915e-05	****
CTR9	Normal	PAM50 Her2	112	82	6129	6.97e-05	0.000116	0.000146657	***
CTR9	Normal	PAM50 Basal	112	194	16729	3.67e-15	1.84e-14	2.08181e-14	****
CTSA	PAM50 Her2	PAM50 Basal	82	194	8319	0.548	0.548	0.598155	ns
CTSA	PAM50 LumB	PAM50 Her2	207	82	8889	0.531	0.548	0.581708	ns
CTSA	PAM50 LumB	PAM50 Basal	207	194	21807	0.136	0.187	0.172896	ns
CTSA	PAM50 LumA	PAM50 LumB	566	207	40465	4.4e-11	1.32e-10	1.78246e-10	****
CTSA	PAM50 LumA	PAM50 Her2	566	82	16680	3.81e-05	7.14e-05	8.30702e-05	****
CTSA	PAM50 LumA	PAM50 Basal	566	194	43516	1.6e-05	3.43e-05	3.6394e-05	****
CTSA	PAM50 Normal	PAM50 LumA	40	566	12383	0.321	0.37	0.374343	ns
CTSA	PAM50 Normal	PAM50 LumB	40	207	3281	0.038	0.063	0.0535669	ns
CTSA	PAM50 Normal	PAM50 Her2	40	82	1367	0.137	0.187	0.173965	ns
CTSA	PAM50 Normal	PAM50 Basal	40	194	3457	0.278	0.348	0.329479	ns
CTSA	Normal	PAM50 Normal	112	40	1205	1.5e-05	3.43e-05	3.42442e-05	****
CTSA	Normal	PAM50 LumA	112	566	17824	2.4e-13	9e-13	1.18173e-12	****
CTSA	Normal	PAM50 LumB	112	207	4203	5.63e-21	8.45e-20	4.75798e-20	****
CTSA	Normal	PAM50 Her2	112	82	1648	2.55e-14	1.27e-13	1.35164e-13	****
CTSA	Normal	PAM50 Basal	112	194	4919	1.55e-15	1.16e-14	9.06937e-15	****
CUEDC1	PAM50 Her2	PAM50 Basal	82	194	10799	2.68e-06	8.04e-06	6.65427e-06	****
CUEDC1	PAM50 LumB	PAM50 Her2	207	82	10877	0.000191	0.000478	0.000380171	***
CUEDC1	PAM50 LumB	PAM50 Basal	207	194	31503	6.93e-23	3.46e-22	6.67022e-22	****
CUEDC1	PAM50 LumA	PAM50 LumB	566	207	54092	0.103	0.11	0.134127	ns
CUEDC1	PAM50 LumA	PAM50 Her2	566	82	28937	0.000298	0.000502	0.000580442	***
CUEDC1	PAM50 LumA	PAM50 Basal	566	194	85698	1.81e-31	2.72e-30	3.21819e-30	****
CUEDC1	PAM50 Normal	PAM50 LumA	40	566	7460	0.00031	0.000502	0.000602337	***
CUEDC1	PAM50 Normal	PAM50 LumB	40	207	2625	0.000251	0.000502	0.000493076	***
CUEDC1	PAM50 Normal	PAM50 Her2	40	82	1518	0.508	0.508	0.559813	ns
CUEDC1	PAM50 Normal	PAM50 Basal	40	194	5075	0.002	0.003	0.00342622	**
CUEDC1	Normal	PAM50 Normal	112	40	1691	0.022	0.027	0.0323715	*
CUEDC1	Normal	PAM50 LumA	112	566	11802	8.29e-26	6.22e-25	9.87336e-25	****
CUEDC1	Normal	PAM50 LumB	112	207	4496	1.81e-19	6.79e-19	1.38486e-18	****
CUEDC1	Normal	PAM50 Her2	112	82	3206	0.000335	0.000502	0.000646881	***
CUEDC1	Normal	PAM50 Basal	112	194	12378	0.042	0.049	0.0588634	ns
CYTH1	PAM50 Her2	PAM50 Basal	82	194	5784	0.000343	0.001	0.000661744	***
CYTH1	PAM50 LumB	PAM50 Her2	207	82	7683	0.21	0.262	0.256155	ns
CYTH1	PAM50 LumB	PAM50 Basal	207	194	12553	8.68e-11	5.3e-10	3.40874e-10	****
CYTH1	PAM50 LumA	PAM50 LumB	566	207	64364	0.035	0.066	0.049546	*
CYTH1	PAM50 LumA	PAM50 Her2	566	82	22500	0.656	0.703	0.698911	ns
CYTH1	PAM50 LumA	PAM50 Basal	566	194	36833	7.53e-12	1.13e-10	3.26562e-11	****
CYTH1	PAM50 Normal	PAM50 LumA	40	566	14036	0.011	0.024	0.0169935	*
CYTH1	PAM50 Normal	PAM50 LumB	40	207	5337	0.004	0.01	0.00659615	**
CYTH1	PAM50 Normal	PAM50 Her2	40	82	1946	0.096	0.144	0.125706	ns
CYTH1	PAM50 Normal	PAM50 Basal	40	194	3512	0.346	0.399	0.400342	ns
CYTH1	Normal	PAM50 Normal	112	40	1443	0.00086	0.003	0.001571	**
CYTH1	Normal	PAM50 LumA	112	566	28546	0.096	0.144	0.125706	ns
CYTH1	Normal	PAM50 LumB	112	207	11870	0.724	0.724	0.760592	ns
CYTH1	Normal	PAM50 Her2	112	82	3978	0.112	0.153	0.144639	ns
CYTH1	Normal	PAM50 Basal	112	194	6049	1.06e-10	5.3e-10	4.13485e-10	****
DAG1	PAM50 Her2	PAM50 Basal	82	194	7475	0.43	0.461	0.483439	ns
DAG1	PAM50 LumB	PAM50 Her2	207	82	9497	0.115	0.192	0.148185	ns
DAG1	PAM50 LumB	PAM50 Basal	207	194	21025	0.415	0.461	0.468869	ns
DAG1	PAM50 LumA	PAM50 LumB	566	207	62974	0.11	0.192	0.142457	ns
DAG1	PAM50 LumA	PAM50 Her2	566	82	27911	0.003	0.022	0.0050317	**
DAG1	PAM50 LumA	PAM50 Basal	566	194	61903	0.008	0.03	0.0126293	*
DAG1	PAM50 Normal	PAM50 LumA	40	566	7216	0.000126	0.002	0.000257005	***
DAG1	PAM50 Normal	PAM50 LumB	40	207	3037	0.008	0.03	0.0126293	*
DAG1	PAM50 Normal	PAM50 Her2	40	82	1438	0.272	0.408	0.322894	ns
DAG1	PAM50 Normal	PAM50 Basal	40	194	3161	0.065	0.14	0.0880177	ns
DAG1	Normal	PAM50 Normal	112	40	2775	0.025	0.063	0.0364114	*
DAG1	Normal	PAM50 LumA	112	566	27125	0.016	0.047	0.0240869	*
DAG1	Normal	PAM50 LumB	112	207	10915	0.39	0.461	0.444246	ns
DAG1	Normal	PAM50 Her2	112	82	4960	0.341	0.461	0.39508	ns
DAG1	Normal	PAM50 Basal	112	194	10959	0.899	0.899	0.913758	ns
DAPK1	PAM50 Her2	PAM50 Basal	82	194	4736	1.1e-07	4.12e-07	3.15784e-07	****
DAPK1	PAM50 LumB	PAM50 Her2	207	82	5977	8.92e-05	0.000167	0.000185409	***
DAPK1	PAM50 LumB	PAM50 Basal	207	194	7265	2.26e-28	1.7e-27	3.13171e-27	****
DAPK1	PAM50 LumA	PAM50 LumB	566	207	56814	0.52	0.557	0.571882	ns
DAPK1	PAM50 LumA	PAM50 Her2	566	82	15533	1.28e-06	3.84e-06	3.29434e-06	****
DAPK1	PAM50 LumA	PAM50 Basal	566	194	18259	7.71e-44	1.16e-42	3.63829e-42	****
DAPK1	PAM50 Normal	PAM50 LumA	40	566	13901	0.016	0.024	0.0240869	*
DAPK1	PAM50 Normal	PAM50 LumB	40	207	4933	0.055	0.069	0.0756738	ns
DAPK1	PAM50 Normal	PAM50 Her2	40	82	1452	0.307	0.354	0.359988	ns
DAPK1	PAM50 Normal	PAM50 Basal	40	194	2010	1.62e-06	4.05e-06	4.13285e-06	****
DAPK1	Normal	PAM50 Normal	112	40	2176	0.79	0.79	0.818988	ns
DAPK1	Normal	PAM50 LumA	112	566	39680	2.49e-05	5.34e-05	5.53263e-05	****
DAPK1	Normal	PAM50 LumB	112	207	13854	0.004	0.007	0.00659615	**
DAPK1	Normal	PAM50 Her2	112	82	3753	0.03	0.041	0.0430261	*
DAPK1	Normal	PAM50 Basal	112	194	4261	8.32e-19	4.16e-18	6.02768e-18	****
DBN1	PAM50 Her2	PAM50 Basal	82	194	6729	0.043	0.059	0.0601972	ns
DBN1	PAM50 LumB	PAM50 Her2	207	82	6055	0.000147	0.000315	0.000297614	***
DBN1	PAM50 LumB	PAM50 Basal	207	194	11319	4.28e-14	2.14e-13	2.22805e-13	****
DBN1	PAM50 LumA	PAM50 LumB	566	207	62556	0.148	0.171	0.186684	ns
DBN1	PAM50 LumA	PAM50 Her2	566	82	17344	0.000216	0.00036	0.000427495	***
DBN1	PAM50 LumA	PAM50 Basal	566	194	32356	1.3e-17	9.75e-17	8.63699e-17	****
DBN1	PAM50 Normal	PAM50 LumA	40	566	11730	0.702	0.702	0.740778	ns
DBN1	PAM50 Normal	PAM50 LumB	40	207	4564	0.306	0.328	0.35896	ns
DBN1	PAM50 Normal	PAM50 Her2	40	82	1293	0.059	0.074	0.0806183	ns
DBN1	PAM50 Normal	PAM50 Basal	40	194	2460	0.000271	0.000406	0.000529387	***
DBN1	Normal	PAM50 Normal	112	40	1346	0.000185	0.000347	0.000368817	***
DBN1	Normal	PAM50 LumA	112	566	19668	2.14e-10	6.42e-10	8.14394e-10	****
DBN1	Normal	PAM50 LumB	112	207	8233	1.94e-05	4.85e-05	4.37063e-05	****
DBN1	Normal	PAM50 Her2	112	82	2058	5.45e-11	2.04e-10	2.1825e-10	****
DBN1	Normal	PAM50 Basal	112	194	3338	5.9e-24	8.85e-23	6.16112e-23	****
DGAT1	PAM50 Her2	PAM50 Basal	82	194	7165	0.193	0.248	0.237677	ns
DGAT1	PAM50 LumB	PAM50 Her2	207	82	10868	0.000202	0.001	0.000400877	***
DGAT1	PAM50 LumB	PAM50 Basal	207	194	23734	0.002	0.006	0.00342622	**
DGAT1	PAM50 LumA	PAM50 LumB	566	207	46246	7.23e-06	9.23e-05	1.71237e-05	****
DGAT1	PAM50 LumA	PAM50 Her2	566	82	25247	0.198	0.248	0.243319	ns
DGAT1	PAM50 LumA	PAM50 Basal	566	194	53949	0.718	0.743	0.75538	ns
DGAT1	PAM50 Normal	PAM50 LumA	40	566	8298	0.005	0.014	0.00814366	**
DGAT1	PAM50 Normal	PAM50 LumB	40	207	2331	1.23e-05	9.23e-05	2.83996e-05	****
DGAT1	PAM50 Normal	PAM50 Her2	40	82	1397	0.186	0.248	0.229802	ns
DGAT1	PAM50 Normal	PAM50 Basal	40	194	2908	0.013	0.032	0.0198791	*
DGAT1	Normal	PAM50 Normal	112	40	2727	0.042	0.078	0.0588634	ns
DGAT1	Normal	PAM50 LumA	112	566	32340	0.734	0.743	0.769708	ns
DGAT1	Normal	PAM50 LumB	112	207	9929	0.034	0.074	0.0482399	*
DGAT1	Normal	PAM50 Her2	112	82	5104	0.185	0.248	0.228728	ns
DGAT1	Normal	PAM50 Basal	112	194	11109	0.743	0.743	0.777558	ns
DIP2C	PAM50 Her2	PAM50 Basal	82	194	7136	0.177	0.241	0.219521	ns
DIP2C	PAM50 LumB	PAM50 Her2	207	82	10136	0.01	0.017	0.0155643	*
DIP2C	PAM50 LumB	PAM50 Basal	207	194	21060	0.398	0.492	0.45212	ns
DIP2C	PAM50 LumA	PAM50 LumB	566	207	66020	0.007	0.013	0.0111332	*
DIP2C	PAM50 LumA	PAM50 Her2	566	82	30817	1.56e-06	3.9e-06	3.98677e-06	****
DIP2C	PAM50 LumA	PAM50 Basal	566	194	62765	0.003	0.006	0.0050317	**
DIP2C	PAM50 Normal	PAM50 LumA	40	566	10736	0.586	0.586	0.633769	ns
DIP2C	PAM50 Normal	PAM50 LumB	40	207	4397	0.535	0.573	0.585429	ns
DIP2C	PAM50 Normal	PAM50 Her2	40	82	2068	0.02	0.03	0.0296435	*
DIP2C	PAM50 Normal	PAM50 Basal	40	194	4191	0.426	0.492	0.479435	ns
DIP2C	Normal	PAM50 Normal	112	40	3632	5.81e-09	1.74e-08	1.92637e-08	****
DIP2C	Normal	PAM50 LumA	112	566	50534	2.62e-23	3.93e-22	2.623e-22	****
DIP2C	Normal	PAM50 LumB	112	207	19349	5.92e-23	4.44e-22	5.72967e-22	****
DIP2C	Normal	PAM50 Her2	112	82	8324	4.49e-22	2.24e-21	4.10018e-21	****
DIP2C	Normal	PAM50 Basal	112	194	17041	1.19e-16	4.46e-16	7.47927e-16	****
DISC1	PAM50 Her2	PAM50 Basal	82	194	6095	0.002	0.003	0.00342622	**
DISC1	PAM50 LumB	PAM50 Her2	207	82	5636	8.56e-06	1.43e-05	2.01208e-05	****
DISC1	PAM50 LumB	PAM50 Basal	207	194	9472	5.99e-20	3e-19	4.74095e-19	****
DISC1	PAM50 LumA	PAM50 LumB	566	207	73978	2.13e-08	5.32e-08	6.61976e-08	****
DISC1	PAM50 LumA	PAM50 Her2	566	82	20806	0.13	0.15	0.165921	ns
DISC1	PAM50 LumA	PAM50 Basal	566	194	36371	2.18e-12	8.18e-12	9.81506e-12	****
DISC1	PAM50 Normal	PAM50 LumA	40	566	17185	4.25e-08	9.11e-08	1.27544e-07	****
DISC1	PAM50 Normal	PAM50 LumB	40	207	6914	2.02e-11	6.06e-11	8.42954e-11	****
DISC1	PAM50 Normal	PAM50 Her2	40	82	2286	0.000431	0.000646	0.000819567	***
DISC1	PAM50 Normal	PAM50 Basal	40	194	4371	0.208	0.223	0.253999	ns
DISC1	Normal	PAM50 Normal	112	40	2271	0.898	0.898	0.912954	ns
DISC1	Normal	PAM50 LumA	112	566	50306	8.71e-23	6.53e-22	8.31929e-22	****
DISC1	Normal	PAM50 LumB	112	207	20229	4.56e-28	6.84e-27	6.17191e-27	****
DISC1	Normal	PAM50 Her2	112	82	6643	1.11e-07	2.08e-07	3.1855e-07	****
DISC1	Normal	PAM50 Basal	112	194	12712	0.013	0.016	0.0198791	*
DMRTA1	PAM50 Her2	PAM50 Basal	82	194	6017.5	0.001	0.002	0.00177475	**
DMRTA1	PAM50 LumB	PAM50 Her2	207	82	5875.5	4.57e-05	7.62e-05	9.88016e-05	****
DMRTA1	PAM50 LumB	PAM50 Basal	207	194	10639.5	4.02e-16	1.51e-15	2.45589e-15	****
DMRTA1	PAM50 LumA	PAM50 LumB	566	207	69840.5	4.21e-05	7.62e-05	9.14944e-05	****
DMRTA1	PAM50 LumA	PAM50 Her2	566	82	19545.5	0.021	0.026	0.0309941	*
DMRTA1	PAM50 LumA	PAM50 Basal	566	194	29445.5	5.07e-22	2.54e-21	4.62498e-21	****
DMRTA1	PAM50 Normal	PAM50 LumA	40	566	15507	9.15e-05	0.000137	0.000189783	***
DMRTA1	PAM50 Normal	PAM50 LumB	40	207	6029	4.99e-06	1.07e-05	1.20206e-05	****
DMRTA1	PAM50 Normal	PAM50 Her2	40	82	1870	0.211	0.211	0.257339	ns
DMRTA1	PAM50 Normal	PAM50 Basal	40	194	3041	0.032	0.036	0.0456919	*
DMRTA1	Normal	PAM50 Normal	112	40	3401	1.2e-06	3e-06	3.09483e-06	****
DMRTA1	Normal	PAM50 LumA	112	566	57606	1.33e-42	2e-41	5.45113e-41	****
DMRTA1	Normal	PAM50 LumB	112	207	19732	4.1e-25	3.08e-24	4.62442e-24	****
DMRTA1	Normal	PAM50 Her2	112	82	6844	5.61e-09	1.68e-08	1.86289e-08	****
DMRTA1	Normal	PAM50 Basal	112	194	11831	0.195	0.209	0.23997	ns
DNAH2	PAM50 Her2	PAM50 Basal	82	194	6402	0.011	0.026	0.0169935	*
DNAH2	PAM50 LumB	PAM50 Her2	207	82	8791	0.636	0.941	0.679843	ns
DNAH2	PAM50 LumB	PAM50 Basal	207	194	16558	0.002	0.007	0.00342622	**
DNAH2	PAM50 LumA	PAM50 LumB	566	207	72457	4.48e-07	6.72e-06	1.2116e-06	****
DNAH2	PAM50 LumA	PAM50 Her2	566	82	29354	0.000104	0.00052	0.000213779	***
DNAH2	PAM50 LumA	PAM50 Basal	566	194	55357	0.863	0.941	0.882614	ns
DNAH2	PAM50 Normal	PAM50 LumA	40	566	11240	0.941	0.941	0.950582	ns
DNAH2	PAM50 Normal	PAM50 LumB	40	207	5124	0.017	0.033	0.0255	*
DNAH2	PAM50 Normal	PAM50 Her2	40	82	2083	0.016	0.033	0.0240869	*
DNAH2	PAM50 Normal	PAM50 Basal	40	194	3913	0.934	0.941	0.945042	ns
DNAH2	Normal	PAM50 Normal	112	40	2316	0.752	0.941	0.785658	ns
DNAH2	Normal	PAM50 LumA	112	566	32242	0.773	0.941	0.804997	ns
DNAH2	Normal	PAM50 LumB	112	207	14725	6.78e-05	0.000508	0.000142901	***
DNAH2	Normal	PAM50 Her2	112	82	5952	0.000433	0.002	0.00082319	***
DNAH2	Normal	PAM50 Basal	112	194	11106	0.746	0.941	0.780417	ns
DNMBP-AS1	PAM50 Her2	PAM50 Basal	82	194	12233	1.65e-12	8.25e-12	7.51408e-12	****
DNMBP-AS1	PAM50 LumB	PAM50 Her2	207	82	6455	0.002	0.003	0.00342622	**
DNMBP-AS1	PAM50 LumB	PAM50 Basal	207	194	26707	1.1e-08	2.75e-08	3.53311e-08	****
DNMBP-AS1	PAM50 LumA	PAM50 LumB	566	207	77690	3.62e-12	1.36e-11	1.60664e-11	****
DNMBP-AS1	PAM50 LumA	PAM50 Her2	566	82	25100	0.232	0.268	0.280094	ns
DNMBP-AS1	PAM50 LumA	PAM50 Basal	566	194	88642	1.97e-37	2.96e-36	5.4771e-36	****
DNMBP-AS1	PAM50 Normal	PAM50 LumA	40	566	10350	0.365	0.391	0.419325	ns
DNMBP-AS1	PAM50 Normal	PAM50 LumB	40	207	5190	0.011	0.017	0.0169935	*
DNMBP-AS1	PAM50 Normal	PAM50 Her2	40	82	1677	0.842	0.842	0.863869	ns
DNMBP-AS1	PAM50 Normal	PAM50 Basal	40	194	6008	4.82e-08	1.03e-07	1.43417e-07	****
DNMBP-AS1	Normal	PAM50 Normal	112	40	2754	0.032	0.04	0.0456919	*
DNMBP-AS1	Normal	PAM50 LumA	112	566	36324	0.015	0.02	0.0227068	*
DNMBP-AS1	Normal	PAM50 LumB	112	207	16897	1.52e-11	4.56e-11	6.42596e-11	****
DNMBP-AS1	Normal	PAM50 Her2	112	82	5685	0.005	0.008	0.00814366	**
DNMBP-AS1	Normal	PAM50 Basal	112	194	18584	4.01e-25	3.01e-24	4.53462e-24	****
DOK7	PAM50 Her2	PAM50 Basal	82	194	7339	0.311	0.311	0.364238	ns
DOK7	PAM50 LumB	PAM50 Her2	207	82	13824	7.94e-17	2.38e-16	5.05958e-16	****
DOK7	PAM50 LumB	PAM50 Basal	207	194	31216	7.88e-22	2.96e-21	7.09932e-21	****
DOK7	PAM50 LumA	PAM50 LumB	566	207	68429	0.000341	0.000639	0.000658031	***
DOK7	PAM50 LumA	PAM50 Her2	566	82	40761.5	1.56e-28	7.8e-28	2.19304e-27	****
DOK7	PAM50 LumA	PAM50 Basal	566	194	92509	4.4e-46	6.6e-45	2.70507e-44	****
DOK7	PAM50 Normal	PAM50 LumA	40	566	5979	6.02e-07	1.29e-06	1.60472e-06	****
DOK7	PAM50 Normal	PAM50 LumB	40	207	2839	0.002	0.003	0.00342622	**
DOK7	PAM50 Normal	PAM50 Her2	40	82	2290	0.000397	0.000662	0.000758549	***
DOK7	PAM50 Normal	PAM50 Basal	40	194	5067	0.002	0.003	0.00342622	**
DOK7	Normal	PAM50 Normal	112	40	1850	0.103	0.11	0.134127	ns
DOK7	Normal	PAM50 LumA	112	566	10042	2.85e-30	2.14e-29	4.5905e-29	****
DOK7	Normal	PAM50 LumB	112	207	5713	7.64e-14	1.91e-13	3.89586e-13	****
DOK7	Normal	PAM50 Her2	112	82	5681	0.005	0.006	0.00814366	**
DOK7	Normal	PAM50 Basal	112	194	12520	0.026	0.03	0.0377419	*
DOPEY2	PAM50 Her2	PAM50 Basal	82	194	13344	5.9e-19	1.77e-18	4.32106e-18	****
DOPEY2	PAM50 LumB	PAM50 Her2	207	82	6518	0.002	0.002	0.00342622	**
DOPEY2	PAM50 LumB	PAM50 Basal	207	194	30330	9.78e-19	2.44e-18	7.06199e-18	****
DOPEY2	PAM50 LumA	PAM50 LumB	566	207	54910	0.182	0.195	0.225306	ns
DOPEY2	PAM50 LumA	PAM50 Her2	566	82	16308	1.34e-05	1.68e-05	3.07685e-05	****
DOPEY2	PAM50 LumA	PAM50 Basal	566	194	83056	1.42e-26	7.1e-26	1.77094e-25	****
DOPEY2	PAM50 Normal	PAM50 LumA	40	566	6262	2.29e-06	3.82e-06	5.73485e-06	****
DOPEY2	PAM50 Normal	PAM50 LumB	40	207	2243	4.55e-06	6.82e-06	1.10001e-05	****
DOPEY2	PAM50 Normal	PAM50 Her2	40	82	606	1.74e-08	3.26e-08	5.45429e-08	****
DOPEY2	PAM50 Normal	PAM50 Basal	40	194	4192	0.424	0.424	0.477677	ns
DOPEY2	Normal	PAM50 Normal	112	40	1186	1.04e-05	1.42e-05	2.42047e-05	****
DOPEY2	Normal	PAM50 LumA	112	566	6860	2.76e-39	4.14e-38	8.60529e-38	****
DOPEY2	Normal	PAM50 LumB	112	207	2728	1.79e-29	1.34e-28	2.70358e-28	****
DOPEY2	Normal	PAM50 Her2	112	82	565	1.95e-25	7.31e-25	2.26076e-24	****
DOPEY2	Normal	PAM50 Basal	112	194	6592	1.01e-08	2.16e-08	3.25242e-08	****
DPP4	PAM50 Her2	PAM50 Basal	82	194	9228	0.036	0.038	0.0508791	ns
DPP4	PAM50 LumB	PAM50 Her2	207	82	5982	9.21e-05	0.000154	0.000190846	***
DPP4	PAM50 LumB	PAM50 Basal	207	194	17586	0.032	0.036	0.0456919	*
DPP4	PAM50 LumA	PAM50 LumB	566	207	72806	2.29e-07	5.72e-07	6.38101e-07	****
DPP4	PAM50 LumA	PAM50 Her2	566	82	22525	0.668	0.668	0.71005	ns
DPP4	PAM50 LumA	PAM50 Basal	566	194	61247	0.016	0.02	0.0240869	*
DPP4	PAM50 Normal	PAM50 LumA	40	566	15708	4.13e-05	7.74e-05	8.98229e-05	****
DPP4	PAM50 Normal	PAM50 LumB	40	207	6467	1.86e-08	5.58e-08	5.80959e-08	****
DPP4	PAM50 Normal	PAM50 Her2	40	82	2281	0.000477	0.000716	0.000901149	***
DPP4	PAM50 Normal	PAM50 Basal	40	194	5638	6.53e-06	1.4e-05	1.55587e-05	****
DPP4	Normal	PAM50 Normal	112	40	2980	0.002	0.003	0.00342622	**
DPP4	Normal	PAM50 LumA	112	566	53801	1.79e-31	1.34e-30	3.18912e-30	****
DPP4	Normal	PAM50 LumB	112	207	21034	3.23e-33	4.85e-32	6.6348e-32	****
DPP4	Normal	PAM50 Her2	112	82	7762	2.32e-16	8.7e-16	1.43338e-15	****
DPP4	Normal	PAM50 Basal	112	194	18745	4.12e-26	2.06e-25	4.9955e-25	****
DSC3	PAM50 Her2	PAM50 Basal	82	194	1989	7.37e-23	1.84e-22	7.07812e-22	****
DSC3	PAM50 LumB	PAM50 Her2	207	82	6963	0.017	0.022	0.0255	*
DSC3	PAM50 LumB	PAM50 Basal	207	194	3981.5	8.57e-44	1.29e-42	4.02237e-42	****
DSC3	PAM50 LumA	PAM50 LumB	566	207	88796.5	4.21e-28	1.26e-27	5.72481e-27	****
DSC3	PAM50 LumA	PAM50 Her2	566	82	32224	1.26e-08	1.72e-08	4.01599e-08	****
DSC3	PAM50 LumA	PAM50 Basal	566	194	25448.5	6.3e-29	2.36e-28	9.07517e-28	****
DSC3	PAM50 Normal	PAM50 LumA	40	566	18667	6.65e-12	9.98e-12	2.89693e-11	****
DSC3	PAM50 Normal	PAM50 LumB	40	207	7990	1.33e-20	2.49e-20	1.09952e-19	****
DSC3	PAM50 Normal	PAM50 Her2	40	82	3112	1.01e-15	1.68e-15	5.96974e-15	****
DSC3	PAM50 Normal	PAM50 Basal	40	194	3662	0.577	0.618	0.62543	ns
DSC3	Normal	PAM50 Normal	112	40	2671	0.072	0.083	0.0967462	ns
DSC3	Normal	PAM50 LumA	112	566	53858.5	1.25e-31	6.25e-31	2.264e-30	****
DSC3	Normal	PAM50 LumB	112	207	21223.5	1.71e-34	1.28e-33	3.86744e-33	****
DSC3	Normal	PAM50 Her2	112	82	8310	6.4e-22	1.37e-21	5.79585e-21	****
DSC3	Normal	PAM50 Basal	112	194	10943.5	0.916	0.916	0.928982	ns
DSG3	PAM50 Her2	PAM50 Basal	82	194	3335.5	2.52e-14	4.2e-14	1.33736e-13	****
DSG3	PAM50 LumB	PAM50 Her2	207	82	7078	0.028	0.035	0.0403766	*
DSG3	PAM50 LumB	PAM50 Basal	207	194	6738	1.28e-30	9.6e-30	2.12441e-29	****
DSG3	PAM50 LumA	PAM50 LumB	566	207	89436	3.09e-29	1.54e-28	4.5877e-28	****
[truncated: 6,731 more rows]
