# Supplementary material for: Luminal epithelial cells integrate variable responses to aging into stereotypical changes that underlie breast cancer susceptibility
Source: eLife. 2024 Nov 15;13:e95720. doi: 10.7554/eLife.95720 (PMC11723586; doi:10.7554/eLife.95720)
Supplement: Figure 8—source data 1. — (A) Scaled variable importance of age-dependent genes derived from LEPs in machine learning multi-class prediction of TCGA matched normal and PAM50 subtype classes. [file elife-95720-fig8-data1.xlsx]

## Sheet: A ML Scaled Variable Importance
GeneSYM	Normal	PAM50_Basal	PAM50_Her2	PAM50_LumA	PAM50_LumB	Cumulative_SVI
ESR1	0	17.8702	80.2764	39.777	56.7252	194.649
FAM198B	0	21.3669	0	100	5.00101	126.368
GPR108	5.14448	0	0	43.8238	69.5857	118.554
MLLT3	0	0	0	61.7256	48.2319	109.958
DSG3	0	20.4485	6.70174	16.2614	56.8344	100.246
TMEM63C	0	37.0268	53.0775	6.91921	0	97.0235
ZNRF3	0	0	0	40.6659	56.3567	97.0226
HNF4G	0	0	49.8538	44.0664	0	93.9202
HSD17B1	0	0	18.7266	72.3437	0	91.0703
FAM134B	0	0.886971	44.727	35.7599	8.19195	89.5658
TMEM45B	0	9.98369	58.8095	0	20.6317	89.4249
ARL4A	21.8658	0	25.4101	41.0204	0.784988	89.0813
DSC3	0	9.82615	1.7379	20.2388	54.944	86.7469
CREB3L1	22.578	0	47.4031	15.757	0.00954682	85.7477
SERPINE1	23.7695	0	0	60.9862	0	84.7558
ELF5	0	24.9982	0	53.2981	0	78.2963
TMEM144	0	24.1574	0	53.5319	0	77.6894
TPPP	15.0984	13.9182	0	10.4159	38.2141	77.6466
ABCC2	0	0	45.2514	5.54702	26.3592	77.1576
CDON	0	0	50.709	26.1863	0	76.8954
TBX19	0	38.8636	0	37.942	0	76.8056
TMEM25	0	15.3544	14.9973	44.7326	0	75.0843
HK2	0	0	9.23072	44.5479	21.1277	74.9062
HAS3	36.3065	0	0	0	37.0454	73.3519
TRIM29	3.37637	7.57783	0	0	62.3546	73.3088
CES1	30.5218	37.6194	0	0	2.4879	70.6291
SLC25A37	0	44.9412	0	0	24.6532	69.5944
SOX11	0	0	45.0203	19.6127	4.12416	68.7573
TRIM65	0	31.64	23.7635	0	13.1942	68.5977
TMTC1	11.274	0	4.84689	39.1593	12.6599	67.9401
RASGEF1C	9.25091	31.5039	0	26.939	0	67.6939
PDZD2	12.9118	0	12.4877	0	41.9726	67.3721
FN1	65.6386	0	1.25988	0	0	66.8985
PGBD5	0	44.3462	21.6759	0	0	66.0221
FA2H	0	0	54.6454	0	11.3185	65.964
KCNQ4	0	23.1033	12.1015	29.4528	0	64.6576
SBDS	31.0264	0	0	33.5792	0	64.6056
CRAT	0	0	27.4479	4.49264	31.4144	63.3549
ZNF518B	0	0	20.153	28.3961	14.055	62.6041
TMEM246	33.1256	0	29.3359	0	0	62.4615
PAK6	0	0	14.3626	2.5678	45.2209	62.1512
`TPT1-AS1`	24.9013	0	36.7494	0	0	61.6507
ACVR1C	34.7242	0	0	0	26.6165	61.3407
MED16	0	0	37.6959	0	23.3247	61.0206
VTCN1	0	0	0	37.2539	23.2987	60.5526
MED12L	0	0	31.366	18.8834	10.2302	60.4796
PPARGC1B	0	0	13.1844	46.668	0	59.8523
CHODL	0	31.9661	17.5394	0	9.71256	59.2181
ANKRD10	0	0	0	40.9471	17.3063	58.2534
OSR1	16.7145	0	24.3392	2.82967	13.9224	57.8059
C9orf66	7.85759	0	0	17.9585	30.4902	56.3062
PFN4	0	0	44.1058	0	12.07	56.1758
DOK7	0	0	31.0163	15.81	8.72427	55.5506
FZD2	4.38882	0	0	50.9802	0	55.369
CLCN4	0	31.8612	0.168666	0	22.5326	54.5625
QPCT	0	21.6625	9.15897	21.1756	2.28801	54.2851
PLIN2	0	0	0	54.1581	0	54.1581
CDK12	0	0	53.715	0	0	53.715
TM4SF18	0	0	25.9747	0	27.4875	53.4622
BCL11A	0	34.7565	0	0	18.5254	53.2819
ABCA10	38.5956	0	0	0	14.6598	53.2554
EGFLAM	18.4494	0	0	18.2119	15.1727	51.834
NAMPT	0	0	0	9.9905	41.732	51.7225
NAGS	0	0	20.7752	30.8192	0	51.5944
GLI1	0	0	0	51.5699	0	51.5699
ALDH3A1	8.25885	0	6.05339	20.35	16.8695	51.5317
SH3RF2	2.39963	0	0	0	49.1186	51.5182
RBP7	18.7985	0	15.5204	10.8241	6.18205	51.325
BAIAP2L2	0	42.3117	7.57365	0	0	49.8854
CLEC16A	0	0	0	49.0142	0.522315	49.5365
EFNB1	0	7.87469	26.5964	0	14.7159	49.187
`ZNF503-AS2`	0	0	0	45.6837	3.26383	48.9475
ERRFI1	8.02767	11.4546	29.409	0	0	48.8912
TRIM26	0	0	2.88987	38.0318	7.93737	48.859
STAC2	7.36838	0	0	0	41.0585	48.4269
SLC35G2	8.57503	0	17.4643	18.4588	3.49509	47.9932
ROBO3	31.6529	0	16.2767	0	0	47.9296
HPD	24.9598	0	0	21.9806	0	46.9404
C4orf26	0	0.86176	0	9.88982	35.0328	45.7844
EIF5	0	21.1102	24.2734	0	0	45.3836
HSPA4L	0	1.99598	28.8675	7.63153	6.31447	44.8095
GPC2	0	19.9145	0	23.9854	0	43.8999
PKIB	0	0	8.76014	0	35.0388	43.7989
ZNF503	0	0	0	27.6186	16.1572	43.7758
SLC35G1	0	0	0	43.7599	0	43.7599
CAPN8	0	28.59	0	14.6996	0	43.2896
DUSP2	0	0	0	36.2285	6.80349	43.032
NTN4	0	3.36712	0	25.7207	13.6518	42.7396
RBBP8	0	0	42.6003	0	0	42.6003
TMPRSS2	0	0	25.6516	0	16.7917	42.4433
BATF	0	8.11198	0	33.8767	0	41.9887
PPFIA3	0	0	38.741	2.92625	0	41.6672
AC093627.10	0	7.95337	33.6039	0	0	41.5572
TBL1X	0	0	18.0334	0	23.2042	41.2377
KIAA0319	0	0	0	10.103	30.665	40.768
ACTR3B	0	10.0975	0	20.9112	9.61872	40.6274
FAM3D	15.1716	4.754	0	20.5738	0	40.4994
SMARCA1	0	0	0	6.62825	33.8362	40.4644
KRT14	0	0	0	0	40.3628	40.3628
NLGN2	0	0	11.5051	27.7176	0.958781	40.1814
HRASLS	0	0	15.0809	24.7649	0	39.8458
SATB1	0	0	0	2.46073	37.3493	39.81
TTLL7	0	0	20.969	18.5042	0	39.4732
CBX2	0	0	24.6621	14.7253	0	39.3874
PIWIL2	1.18655	0	0	8.93435	29.1031	39.224
C22orf29	0	0	33.942	0	5.1146	39.0566
ANKRD35	15.1881	0	0	0	23.7986	38.9867
BLCAP	2.56606	0	18.5684	0	17.3131	38.4476
ZNF250	0	0	0	31.6587	6.76835	38.427
EMP2	0	8.49621	0	0	29.9191	38.4153
MYCL	0	0	0	19.0051	19.3463	38.3514
GCNT2	0	6.48501	0	0	31.6927	38.1777
SH3BP1	3.09104	0	19.6174	15.0043	0	37.7127
GPR161	0	37.6215	0	0	0	37.6215
ARHGAP19	27.2137	0	0	10.3282	0	37.5419
FBXL16	0	8.27165	0	28.9228	0	37.1944
CCNYL1	0	0	0	33.3412	3.21169	36.5529
SYNJ2	0	0	29.9717	0	6.26324	36.2349
USP2	0	0	0	25.2481	10.6307	35.8788
SLC16A1	0	21.2966	0	0	14.0872	35.3838
TGIF1	0	0	0	2.64924	32.6631	35.3124
PLIN4	22.8187	0	0	4.78113	7.71173	35.3115
GLTSCR1	0	0	3.34702	8.96089	22.721	35.0289
KLHL13	34.9767	0	0	0	0	34.9767
HSD11B2	0	0	0	0	34.7455	34.7455
ZNF358	0	0	0	13.2532	21.3311	34.5844
TOX3	0	19.4318	0	15.0454	0	34.4772
MSX2	0	22.1811	12.1261	0	0	34.3072
COPZ2	0	0	0	9.45644	24.8299	34.2863
TMEM5	0	11.2717	22.9124	0	0	34.1841
ARL4D	0	0	0	0	33.955	33.955
TIMP4	32.0745	0	1.65368	0	0	33.7282
APBB3	0	0	33.6007	0	0	33.6007
PDE5A	0	0	14.2891	19.3017	0	33.5908
CLSTN2	0	17.5192	0	0	15.9213	33.4406
TSHZ2	29.4404	0	3.85425	0	0	33.2947
PAEP	0	0	0	14.4417	18.7566	33.1983
FIBP	0	0	0	2.2686	30.7148	32.9834
ATP2B1	0	0	17.8494	0	15.1259	32.9753
ATP7B	0	20.0383	0	12.8982	0	32.9365
HECTD2	0	0	0	0	32.8354	32.8354
ALDH3A2	5.76097	0	16.1364	10.9087	0	32.806
KCTD13	0	0	0	27.0563	5.42317	32.4795
ZNF208	0	0	0	22.796	9.64506	32.4411
`DNMBP-AS1`	0	0	0	32.358	0	32.358
SOX15	0	0	8.63199	17.0293	6.62502	32.2863
TYW3	0	0	32.1769	0	0	32.1769
COL4A6	12.6608	0	0	4.4885	14.7175	31.8668
HARS2	0	0	26.0201	0	5.59637	31.6165
RBCK1	0	0	13.3383	0	18.0277	31.366
CLDN11	14.8054	1.96176	0	12.5735	1.94136	31.282
LINC00958	0	0	0	13.4847	17.3927	30.8774
ARMC7	0	0	0	0	30.7779	30.7779
SYTL3	0	0	23.3359	0	7.12507	30.461
NICN1	0	0	30.3065	0	0	30.3065
WISP3	2.32589	0	19.4167	0	8.46745	30.21
AACS	14.9877	0	0	11.5457	3.67073	30.2042
UBTF	0	0	0	30.0829	0	30.0829
LARP6	23.685	0	0	0	6.2337	29.9187
ACBD5	0	0	29.8922	0	0	29.8922
TGIF2	0	0	3.49596	0	25.7425	29.2385
ULK4	0	0	11.3618	17.6339	0	28.9957
SFXN5	0	0	2.39016	0	26.481	28.8712
`AFAP1-AS1`	0	25.9158	2.91011	0	0	28.8259
PHACTR3	0	0	0	28.7886	0	28.7886
EFHD1	0	24.6356	3.65593	0	0	28.2915
COL8A1	10.2668	0	0	17.6731	0	27.94
FAM228A	27.8264	0	0	0	0	27.8264
OPRK1	0	22.5089	0	0	5.03075	27.5396
IGFBP2	0	3.01497	18.0224	1.23019	5.23293	27.5005
P2RX4	0	18.4641	0	6.73746	2.19927	27.4009
LMCD1	0	0	0	0	26.9629	26.9629
GSTM2	8.18841	0	18.6938	0	0	26.8822
KITLG	0	0.862567	17.7724	6.57327	1.63265	26.8409
SCNN1A	0	18.0521	0	8.78634	0	26.8384
ZNF687	0	0	0	26.5389	0	26.5389
SPRTN	0	0	7.72442	14.8786	3.73493	26.338
MUC19	0	0	26.1849	0	0	26.1849
LDHC	0	0	0	22.7797	3.35355	26.1333
CDC42BPG	0	0	10.0372	15.8686	0	25.9058
PLSCR1	0	0	0	9.08523	16.7173	25.8025
ZNF443	0	0	0	25.6885	0	25.6885
PPTC7	0	0	10.1732	15.3476	0	25.5208
CDK5R1	24.938	0	0	0.480237	0	25.4182
SMIM8	0	10.0826	0	0	15.2511	25.3337
PAX9	0	0	25.2699	0	0	25.2699
PRCD	24.6732	0	0	0	0	24.6732
OPN3	0	0	0	0	24.4237	24.4237
TFPI	0	0	0	0	24.221	24.221
NR3C1	5.51169	0	15.327	3.06909	0	23.9078
MMD	1.40885	0	0	7.14943	15.3422	23.9005
PKM	0.838429	0	15.5545	7.47448	0	23.8674
S100B	20.5189	0	0	0	3.32279	23.8417
PLCD1	5.00082	0	6.88166	5.36183	6.50078	23.7451
BCL2L14	0	23.6089	0	0	0	23.6089
FOXP1	0	23.4335	0	0	0	23.4335
NPY5R	0	0	23.3112	0	0	23.3112
BTBD11	0	0	0	0	23.2054	23.2054
SORD	0	4.78161	0	0	18.3065	23.0882
ARL11	0	0	0	0	22.9645	22.9645
TRMT6	0	0	0	0	22.9393	22.9393
GSTK1	0	0	6.23713	16.5491	0	22.7862
ZNF613	0	0	17.821	4.76272	0	22.5837
RNF44	0	0	0	22.5735	0	22.5735
FMO2	21.5763	0	0	0	0	21.5763
SH3TC1	0	0	0	19.579	1.86786	21.4469
CASC10	0	21.3252	0	0	0	21.3252
IL17RC	0	0	0	0	21.3114	21.3114
RASIP1	18.4136	0	0	0.513327	2.37733	21.3043
PLEKHG2	0	16.4538	0	4.60287	0	21.0567
PSME1	0	2.96426	0	0	18.015	20.9793
ZSWIM8	0	0	13.5965	0	7.37169	20.9681
PLCD3	1.73851	0	19.1036	0	0	20.8421
CBWD5	0	0	4.89826	15.8513	0	20.7496
APBA2	0	4.72229	2.45946	13.5138	0	20.6955
PLD5	14.0499	0	0	0	6.15152	20.2014
THSD1	20.1456	0	0	0	0	20.1456
CLTCL1	0	0	0	0	20.1155	20.1155
OLFM4	0	0	0	0	20.0304	20.0304
SH2B2	0	0.796617	13.2738	0	5.83564	19.906
ZNF438	0	0	9.59359	10.1448	0	19.7384
KLHL3	0	0	0	19.3927	0	19.3927
NME7	0	0	7.72361	0	11.522	19.2456
RAET1E	0	0	0	19.0786	0	19.0786
SCNN1B	0	0	18.8123	0	0	18.8123
2021-03-09	0	0	0	18.6966	0	18.6966
ZBTB5	0	6.19045	0	0	12.5003	18.6908
RDH10	0	9.86731	0	8.67608	0	18.5434
BRINP2	0	0	12.1665	6.22369	0	18.3902
FMO6P	0	18.2792	0	0	0	18.2792
IGFL2	0.404828	0	17.8569	0	0	18.2617
ATP2A2	0	0	0	12.9133	5.33382	18.2471
MYH10	0	0	17.2709	0	0.889979	18.1609
TF	8.91154	0	9.19235	0	0	18.1039
RXRA	0	17.8689	0	0	0	17.8689
FHOD3	15.648	0	0	2.20828	0	17.8563
MEX3A	0	17.7613	0	0	0	17.7613
DGAT1	0	0	0	4.25955	13.4056	17.6651
SGPP2	0	0	0	0	17.4897	17.4897
SLC25A12	0	0	0	5.68425	11.5856	17.2699
TIA1	0	0	0	0	16.6748	16.6748
CDKL5	0	0	0	0	16.5993	16.5993
SLC16A7	6.02667	0	1.29097	9.15787	0	16.4755
TGM1	0	16.3913	0	0	0	16.3913
MMP9	16.3692	0	0	0	0	16.3692
TMEM132A	4.50756	0	1.94912	9.86781	0	16.3245
KCNIP3	0	0	16.3053	0	0	16.3053
LINC00665	0	0	6.71803	9.57734	0	16.2954
PHLPP1	0	0	16.1815	0.0475924	0	16.2291
SLC35E4	0	0	3.22692	12.8371	0	16.064
EMP1	14.4022	0	1.6474	0	0	16.0496
ABLIM3	0	15.9329	0	0	0	15.9329
`PRRT3-AS1`	0	0	15.9289	0	0	15.9289
MLIP	11.296	0.751304	0	3.65356	0	15.7009
MUC16	0	15.4353	0	0	0	15.4353
HOXC6	0	10.5781	0	0	4.52764	15.1057
C16orf62	0	7.6103	0	7.45584	0	15.0661
FOXO3	0	0	14.9148	0	0	14.9148
TIMP3	0	0	0	0	14.1996	14.1996
TMX4	0	0	0	0	13.8885	13.8885
RARB	0.141648	0	0	0	13.5608	13.7025
EDN2	13.3776	0	0	0	0	13.3776
CTSA	10.2057	0	0	0	2.97085	13.1766
MAP1B	0	0	0	13.1417	0	13.1417
SERPINB9	0	0	0	0	13.0561	13.0561
NAALADL1	13.0482	0	0	0	0	13.0482
OSGIN1	12.9255	0	0	0	0	12.9255
RPL18A	0	0	1.13772	11.7625	0	12.9002
DOPEY2	0	0	12.6621	0	0	12.6621
B2M	0	0	12.6525	0	0	12.6525
BCO2	0	0	6.06931	6.57119	0	12.6405
APOL3	0	0	8.50897	3.86792	0	12.3769
HSPA12A	0	12.2517	0	0	0	12.2517
PROM1	0	0	0	0	12.2001	12.2001
STK3	0	0	0	12.1352	0	12.1352
GBP3	0	0	0	0	12.0913	12.0913
STC1	0	0	11.5085	0	0.517785	12.0263
LITAF	0	0	10.6657	0	1.33899	12.0047
SGK1	12.0028	0	0	0	0	12.0028
BEGAIN	10.2171	0	0	0	1.55853	11.7757
MTRNR2L2	0	0	3.32316	0	8.13296	11.4561
CTR9	0	0	0	0	11.4336	11.4336
HOXC10	0	0	1.68011	9.66261	0	11.3427
ALDH3B1	0	0	9.36562	0	1.91332	11.2789
GIN1	0	11.2317	0	0	0	11.2317
IRF1	7.90525	0	3.25416	0	0	11.1594
ANKRD65	5.17333	0	0	0.999406	4.9303	11.103
UPK2	0	0	11.0593	0	0	11.0593
LIMD2	10.9023	0	0	0	0	10.9023
TSPAN3	0	0	10.8505	0	0	10.8505
NBL1	0	0	0	10.6815	0	10.6815
DTNBP1	0	0	10.452	0	0	10.452
PKD1L2	10.4515	0	0	0	0	10.4515
AMN	0	0	10.3865	0	0	10.3865
TRIT1	0	0	0	10.2862	0	10.2862
TNFSF14	0	0	0	10.235	0	10.235
LRRK1	0	0	0	0	10.1044	10.1044
FDFT1	5.52355	0	0	0	4.40255	9.9261
SCFD2	0	0	9.72443	0	0	9.72443
ZNF285	0	0	0	7.82349	1.51107	9.33456
EOGT	9.32087	0	0	0	0	9.32087
MBNL3	0	0	4.68263	4.56499	0	9.24762
NEU1	0	0	8.77169	0	0.414125	9.18582
LYN	0	9.16262	0	0	0	9.16262
CDH13	9.07658	0	0	0	0	9.07658
ELOVL4	0	8.8067	0	0	0	8.8067
IFI16	0	8.69974	0	0	0	8.69974
PIGP	0	0	0	1.74497	6.879	8.62397
ARHGEF40	3.39025	0	0	5.21419	0	8.60444
ABRACL	0	0	8.52814	0	0	8.52814
SPATA22	8.44275	0	0	0	0	8.44275
SDCBP2	0	0	0	0	8.44051	8.44051
CPS1	0	0	0	8.40196	0	8.40196
SIN3B	0	0	5.53711	2.84469	0	8.3818
HAUS6	0	8.37752	0	0	0	8.37752
TPM2	8.21172	0	0	0	0	8.21172
SPECC1	0	0	8.14321	0	0	8.14321
ROBO4	8.10378	0	0	0	0	8.10378
RNF130	0	0	0	8.06055	0	8.06055
FAS	0	0	0	0	7.96114	7.96114
ZNF827	0	0	0	0	7.77088	7.77088
KDM2B	0	0	0	7.76792	0	7.76792
NINJ2	3.24633	0	0	0	4.42465	7.67098
FDX1	0	0	0	0	7.44671	7.44671
XK	0	0	0	0	7.43543	7.43543
PEG10	0	0	0	7.42294	0	7.42294
LRRC4	0	0	0	0	6.94867	6.94867
ANKRD7	0	0	6.90897	0	0	6.90897
DAPK1	0	0	0	6.8764	0	6.8764
CHST3	6.02932	0	0	0	0.807785	6.8371
HES2	0	0	0	0.349794	6.44271	6.7925
LSG1	0	0	6.76704	0	0	6.76704
RNF17	0	0	0	6.74483	0	6.74483
HIST1H4C	0	0	0	6.69047	0	6.69047
MAN1A1	0	0	6.61797	0	0	6.61797
MTDH	0	0	0	0	6.2849	6.2849
RHOBTB1	0	0	0	6.27518	0	6.27518
ATP10B	0	5.96957	0	0	0	5.96957
KCNJ6	0	0	5.8584	0	0	5.8584
MRPS24	0	0	0	5.57122	0	5.57122
CYTH1	0	0	0	0	5.56271	5.56271
CELSR3	0	0	5.51452	0	0	5.51452
GRIK2	0	0	0	5.50365	0	5.50365
TNNI2	0	4.96425	0.514684	0	0	5.47893
SARM1	0	5.42932	0	0	0	5.42932
LNX1	0	0	4.78408	0	0.627688	5.41177
CLCN3	0	0	5.32736	0	0	5.32736
FKBP5	0	0	0	0	5.16685	5.16685
CSF2	0	0	0	0	5.06912	5.06912
RHOBTB3	0	0	5.05022	0	0	5.05022
MAP3K12	0	4.95939	0	0	0	4.95939
SFN	0	4.95708	0	0	0	4.95708
FAM118A	0	0	0	4.77177	0	4.77177
MT1E	0	0	0.730429	0	3.99705	4.72748
IFT43	0	0	0	4.61563	0	4.61563
FUT2	3.05488	0	0	1.526	0	4.58089
CLDN10	0	0	0	0	4.55616	4.55616
EIF4EBP1	0	0.495407	0	3.91985	0	4.41525
ZNF521	0	0	4.2552	0	0	4.2552
RIN1	0	0	4.17944	0	0	4.17944
ZSWIM4	0	0	4.14552	0	0	4.14552
PIK3C2B	0	4.05371	0	0	0	4.05371
P2RY1	0	0	3.96803	0	0	3.96803
DMRTA1	0	0	0	0	3.66027	3.66027
METAP1D	0	0	0	2.76945	0.756819	3.52627
PFN2	0	3.43317	0	0	0	3.43317
SGSM2	3.22355	0	0	0	0	3.22355
GRHL2	0	0	0	0.329889	2.76788	3.09777
SMAGP	0	3.04927	0	0	0	3.04927
IGSF9B	0	0	2.90928	0	0	2.90928
TDRD12	0	0	2.86399	0	0	2.86399
GDI1	0	0	0	2.77479	0	2.77479
NARF	0	2.70386	0	0	0	2.70386
PACS2	0	0	0	0	2.53368	2.53368
HOOK2	2.49619	0	0	0	0	2.49619
ARSJ	0	0	0	2.40189	0	2.40189
DISC1	0	0	0	2.39218	0	2.39218
PHYKPL	0	0	2.2555	0	0	2.2555
RP9	0	2.06378	0	0	0	2.06378
SHISA9	0	2.01297	0	0	0	2.01297
ZNF641	0	0	1.98782	0	0	1.98782
PRRG4	0	0	0	0	1.72954	1.72954
FUT6	0	0	1.62445	0	0	1.62445
SYT6	1.53089	0	0	0	0	1.53089
NTN1	0	0	1.51575	0	0	1.51575
COLCA2	0.081517	0	0	1.4185	0	1.50002
TMPRSS11F	1.18997	0	0	0	0	1.18997
SLC6A9	0.855344	0.211236	0	0	0	1.06658
HES4	0	0	0	1.01057	0	1.01057
VPS36	0.970139	0	0	0	0	0.970139
OSBP2	0	0	0.902158	0	0	0.902158
TGFBI	0	0.893074	0	0	0	0.893074
PNRC2	0	0	0	0	0.828242	0.828242
TYMP	0.805088	0	0	0	0	0.805088
VEZF1	0	0.0232763	0	0.673508	0	0.696784
SGCE	0.585203	0	0	0	0	0.585203
TMSB4X	0	0	0	0	0.564806	0.564806
MUC5B	0	0	0.374682	0	0.162633	0.537315
ATP6AP1L	0	0	0	0.373261	0	0.373261
TLR6	0	0	0	0	0.273033	0.273033
PHF11	0	0	0.267947	0	0	0.267947
IFNAR2	0	0	0	0.238731	0	0.238731
ADCY7	0	0	0	0	0	0
ADPRHL1	0	0	0	0	0	0
AKAP1	0	0	0	0	0	0
ALDH1L2	0	0	0	0	0	0
ALDH9A1	0	0	0	0	0	0
ANKH	0	0	0	0	0	0
APOBEC3D	0	0	0	0	0	0
ARL2BP	0	0	0	0	0	0
B4GALNT4	0	0	0	0	0	0
BTN2A1	0	0	0	0	0	0
BTN3A1	0	0	0	0	0	0
BTN3A3	0	0	0	0	0	0
C15orf48	0	0	0	0	0	0
C5orf38	0	0	0	0	0	0
C5orf56	0	0	0	0	0	0
C6orf47	0	0	0	0	0	0
CACNA2D1	0	0	0	0	0	0
CARD11	0	0	0	0	0	0
CD40	0	0	0	0	0	0
CHID1	0	0	0	0	0	0
CLDND1	0	0	0	0	0	0
CNTN1	0	0	0	0	0	0
COBLL1	0	0	0	0	0	0
CORO6	0	0	0	0	0	0
CPNE4	0	0	0	0	0	0
CUEDC1	0	0	0	0	0	0
DAG1	0	0	0	0	0	0
DBN1	0	0	0	0	0	0
DIP2C	0	0	0	0	0	0
DNAH2	0	0	0	0	0	0
DPP4	0	0	0	0	0	0
EFNA1	0	0	0	0	0	0
EHF	0	0	0	0	0	0
EMB	0	0	0	0	0	0
ERC1	0	0	0	0	0	0
FAM171B	0	0	0	0	0	0
FAM65B	0	0	0	0	0	0
FCHSD2	0	0	0	0	0	0
GALNT12	0	0	0	0	0	0
GCC1	0	0	0	0	0	0
GPC4	0	0	0	0	0	0
GPSM3	0	0	0	0	0	0
GREB1L	0	0	0	0	0	0
HCP5	0	0	0	0	0	0
HEY2	0	0	0	0	0	0
`HLA-A`	0	0	0	0	0	0
`HLA-B`	0	0	0	0	0	0
`HLA-DPB1`	0	0	0	0	0	0
KIAA0355	0	0	0	0	0	0
KIAA0895	0	0	0	0	0	0
KIAA1147	0	0	0	0	0	0
L1TD1	0	0	0	0	0	0
LANCL1	0	0	0	0	0	0
LIN7B	0	0	0	0	0	0
LINC00662	0	0	0	0	0	0
LMBR1L	0	0	0	0	0	0
LY6K	0	0	0	0	0	0
MAPK12	0	0	0	0	0	0
MEST	0	0	0	0	0	0
MFN2	0	0	0	0	0	0
MMAA	0	0	0	0	0	0
NAGK	0	0	0	0	0	0
NELFA	0	0	0	0	0	0
NPIPA5	0	0	0	0	0	0
NRG4	0	0	0	0	0	0
NRP2	0	0	0	0	0	0
PAM16	0	0	0	0	0	0
PAPLN	0	0	0	0	0	0
PARP8	0	0	0	0	0	0
PCGF3	0	0	0	0	0	0
PDE12	0	0	0	0	0	0
PHC1	0	0	0	0	0	0
PIK3R5	0	0	0	0	0	0
PISD	0	0	0	0	0	0
PLA2G3	0	0	0	0	0	0
PLAC8	0	0	0	0	0	0
PLEKHO1	0	0	0	0	0	0
POLI	0	0	0	0	0	0
POLR1A	0	0	0	0	0	0
POLR2A	0	0	0	0	0	0
POU2F3	0	0	0	0	0	0
PRDM2	0	0	0	0	0	0
PRKG2	0	0	0	0	0	0
PRMT2	0	0	0	0	0	0
PSORS1C1	0	0	0	0	0	0
PTGFRN	0	0	0	0	0	0
PTOV1	0	0	0	0	0	0
PXDNL	0	0	0	0	0	0
RAPH1	0	0	0	0	0	0
RARRES3	0	0	0	0	0	0
RASA3	0	0	0	0	0	0
RGS10	0	0	0	0	0	0
RGS12	0	0	0	0	0	0
RHPN2	0	0	0	0	0	0
RTP4	0	0	0	0	0	0
SACM1L	0	0	0	0	0	0
SCNN1G	0	0	0	0	0	0
2021-09-06	0	0	0	0	0	0
SHC1	0	0	0	0	0	0
SLC22A18AS	0	0	0	0	0	0
SLK	0	0	0	0	0	0
SOX4	0	0	0	0	0	0
SP3	0	0	0	0	0	0
SSBP3	0	0	0	0	0	0
`STXBP5-AS1`	0	0	0	0	0	0
TAGAP	0	0	0	0	0	0
TBP	0	0	0	0	0	0
TCIRG1	0	0	0	0	0	0
TEAD2	0	0	0	0	0	0
THBS3	0	0	0	0	0	0
THEMIS2	0	0	0	0	0	0
TLR1	0	0	0	0	0	0
TM6SF1	0	0	0	0	0	0
TMLHE	0	0	0	0	0	0
TNFAIP8L2	0	0	0	0	0	0
TRANK1	0	0	0	0	0	0
TSHZ3	0	0	0	0	0	0
TSPAN5	0	0	0	0	0	0
TSPAN9	0	0	0	0	0	0
TSTD2	0	0	0	0	0	0
TUBA1A	0	0	0	0	0	0
TWIST2	0	0	0	0	0	0
TWISTNB	0	0	0	0	0	0
VAMP8	0	0	0	0	0	0
WDR33	0	0	0	0	0	0
ZNF320	0	0	0	0	0	0
ZNF513	0	0	0	0	0	0
ZNF558	0	0	0	0	0	0
ZNF569	0	0	0	0	0	0
ZNF730	0	0	0	0	0	0
ZNF775	0	0	0	0	0	0
ZNF839	0	0	0	0	0	0
ZNF860	0	0	0	0	0	0
ZSCAN2	0	0	0	0	0	0
