# Supplementary material for: Luminal epithelial cells integrate variable responses to aging into stereotypical changes that underlie breast cancer susceptibility
Source: eLife journal article supplement (doi:10.7554/elife.95720), 2024-11-15
Supplement: mdarchecklist1 [file elife-95720-mdarchecklist1-v2.pdf]

## **Materials Design Analysis Reporting (MDAR) Checklist for Authors**

The [MDAR framework](#) establishes a minimum set of requirements in transparent reporting mainly applicable to studies in the life sciences.

*eLife* asks authors to **provide detailed information within their article** to facilitate the interpretation and replication of their work. Authors can also upload supporting materials to comply with relevant reporting guidelines for health-related research (see [EQUATOR Network](#)), life science research (see the [BioSharing Information Resource](#)), or animal research (see the [ARRIVE Guidelines](#) and the [STRANGE Framework](#); for details, see *eLife*'s [Journal Policies](#)). Where applicable, authors should refer to any relevant reporting standards materials in this form.

For all that apply, please note **where in the article** the information is provided. Please note that we also collect information about data availability and ethics in the submission form.

### **Materials:**

| <b>Newly created materials</b>                                                                                                                                                                                                                      | <b>Indicate where provided:<br/>section/figure legend</b>                                                                                  | <b>N/A</b> |
|-----------------------------------------------------------------------------------------------------------------------------------------------------------------------------------------------------------------------------------------------------|--------------------------------------------------------------------------------------------------------------------------------------------|------------|
| The manuscript includes a dedicated "materials availability statement" providing transparent disclosure about availability of newly created materials including details on how materials can be accessed and describing any restrictions on access. | See Declarations, Availability of data and materials section, pg. 51.<br>See Supplementary Methods, Materials Availability section, pg. 2. |            |

| <b>Antibodies</b>                                                                                         | <b>Indicate where provided:<br/>section/figure legend</b>                                                                   | <b>N/A</b> |
|-----------------------------------------------------------------------------------------------------------|-----------------------------------------------------------------------------------------------------------------------------|------------|
| For commercial reagents, provide supplier name, catalogue number and <a href="#">RRID</a> , if available. | See Methods, Method Details section, pg. 40.<br>For full details, see Supplementary Methods, Method Details section, pg. 6. |            |

| <b>DNA and RNA sequences</b>                                                                                        | <b>Indicate where provided:<br/>section/figure legend</b>                                                                           | <b>N/A</b> |
|---------------------------------------------------------------------------------------------------------------------|-------------------------------------------------------------------------------------------------------------------------------------|------------|
| Short novel DNA or RNA including primers, probes: Sequences should be included or deposited in a public repository. | See Methods, Method Details section, pg. 40.<br>For full details, see Supplementary Methods, Materials Availability section, pg. 2. |            |

| <b>Cell materials</b> | <b>Indicate where provided:<br/>section/figure legend</b> | <b>N/A</b> |
|-----------------------|-----------------------------------------------------------|------------|
|                       |                                                           |            |

|                                                                                                                                                  |                                                                                                                                                                                                                  |     |
|--------------------------------------------------------------------------------------------------------------------------------------------------|------------------------------------------------------------------------------------------------------------------------------------------------------------------------------------------------------------------|-----|
| Cell lines: Provide species information, strain. Provide accession number in repository OR supplier name, catalog number, clone number, OR RRID. |                                                                                                                                                                                                                  | N/A |
| Primary cultures: Provide species, strain, sex of origin, genetic modification status.                                                           | See Figure 1 – table supplement 1A<br>See Methods, Experimental Model and Subject Details section, pg. 38<br>For full details, see Supplementary Methods, Experimental Model and Subject Details section, pg. 3. |     |

| <b>Experimental animals</b>                                                                                                                                                                            | <b>Indicate where provided: section/figure legend</b> | <b>N/A</b> |
|--------------------------------------------------------------------------------------------------------------------------------------------------------------------------------------------------------|-------------------------------------------------------|------------|
| Laboratory animals or Model organisms: Provide species, strain, sex, age, genetic modification status. Provide accession number in repository OR supplier name, catalog number, clone number, OR RRID. |                                                       | N/A        |
| Animal observed in or captured from the field: Provide species, sex, and age where possible.                                                                                                           |                                                       | N/A        |

| <b>Plants and microbes</b>                                                                                                                                                   | <b>Indicate where provided: section/figure legend</b> | <b>N/A</b> |
|------------------------------------------------------------------------------------------------------------------------------------------------------------------------------|-------------------------------------------------------|------------|
| Plants: provide species and strain, ecotype and cultivar where relevant, unique accession number if available, and source (including location for collected wild specimens). |                                                       | N/A        |
| Microbes: provide species and strain, unique accession number if available, and source.                                                                                      |                                                       | N/A        |

| <b>Human research participants</b>                                                                                             | <b>Indicate where provided: section/figure legend) or state if these demographics were not collected</b> | <b>N/A</b> |
|--------------------------------------------------------------------------------------------------------------------------------|----------------------------------------------------------------------------------------------------------|------------|
| If collected and within the bounds of privacy constraints report on age, sex, gender and ethnicity for all study participants. |                                                                                                          | N/A        |

**Design:**

| <b>Study protocol</b> | <b>Indicate where provided: section/figure legend</b> | <b>N/A</b> |
|-----------------------|-------------------------------------------------------|------------|
|                       |                                                       |            |

|                                                                                                                                     |  |     |
|-------------------------------------------------------------------------------------------------------------------------------------|--|-----|
| If the study protocol has been pre-registered, provide DOI. For clinical trials, provide the trial registration number OR cite DOI. |  | N/A |
|-------------------------------------------------------------------------------------------------------------------------------------|--|-----|

| Laboratory protocol                                                                     | Indicate where provided: section/figure legend                                                                                                                             | N/A |
|-----------------------------------------------------------------------------------------|----------------------------------------------------------------------------------------------------------------------------------------------------------------------------|-----|
| Provide DOI OR other citation details if detailed step-by-step protocols are available. | See Methods, Experimental Model and Subject Details section, pg. 38<br>For full details, see Supplementary Methods, Experimental Model and Subject Details section, pg. 3. |     |

| Experimental study design (statistics details) *                        |                                                                                                                                                                                                                                                  |     |
|-------------------------------------------------------------------------|--------------------------------------------------------------------------------------------------------------------------------------------------------------------------------------------------------------------------------------------------|-----|
| For in vivo studies: State whether and how the following have been done | Indicate where provided: section/figure legend. If it could have been done, but was not, write "not done"                                                                                                                                        | N/A |
| Sample size determination                                               | See Methods, Materials Design Analysis section: Sample size estimation, pg. 39<br>For full details, see Supplementary Methods, Materials Design Analysis section: Sample size estimation, pg. 5.                                                 |     |
| Randomisation                                                           |                                                                                                                                                                                                                                                  | N/A |
| Blinding                                                                |                                                                                                                                                                                                                                                  | N/A |
| Inclusion/exclusion criteria                                            | See Methods, Experimental Model and Subject Details section, pg. 38 and Method Details section, pg. 40.<br>For full details, see Supplementary Methods, Experimental Model and Subject Details section, pg. 3 and Method Details section, pg. 6. |     |

| Sample definition and in-laboratory replication                        | Indicate where provided: section/figure legend                                                                                                    | N/A |
|------------------------------------------------------------------------|---------------------------------------------------------------------------------------------------------------------------------------------------|-----|
| State number of times the experiment was replicated in the laboratory. | See Figure and Figure Legends for subject (n), sample (m) biological replicate, and technical replicate (l) size for each analysis or experiment. |     |

|                                                                  |                                                                                                                                                                           |  |
|------------------------------------------------------------------|---------------------------------------------------------------------------------------------------------------------------------------------------------------------------|--|
| Define whether data describe technical or biological replicates. | See Methods, Materials Design Analysis section: Replicates, pg. 39.<br>For full details, see Supplementary Methods, Materials Design Analysis section: Replicates, pg. 4. |  |
|------------------------------------------------------------------|---------------------------------------------------------------------------------------------------------------------------------------------------------------------------|--|

| <b>Ethics</b>                                                                                                                                                       | <b>Indicate where provided:<br/>section/submission form</b> | <b>N/A</b> |
|---------------------------------------------------------------------------------------------------------------------------------------------------------------------|-------------------------------------------------------------|------------|
| Studies involving human participants: State details of authority granting ethics approval (IRB or equivalent committee(s), provide reference number for approval.   |                                                             | N/A        |
| Studies involving experimental animals: State details of authority granting ethics approval (IRB or equivalent committee(s), provide reference number for approval. |                                                             | N/A        |
| Studies involving specimen and field samples: State if relevant permits obtained, provide details of authority approving study; if none were required, explain why. |                                                             | N/A        |

| <b>Dual Use Research of Concern (DURC)</b>                                                                                                               | <b>Indicate where provided:<br/>section/submission form</b> | <b>N/A</b> |
|----------------------------------------------------------------------------------------------------------------------------------------------------------|-------------------------------------------------------------|------------|
| If study is subject to dual use research of concern regulations, state the authority granting approval and reference number for the regulatory approval. |                                                             | N/A        |

### Analysis:

| <b>Attrition</b>                                                                                                                                                                                                      | <b>Indicate where provided:<br/>section/figure legend</b>                                                                   | <b>N/A</b> |
|-----------------------------------------------------------------------------------------------------------------------------------------------------------------------------------------------------------------------|-----------------------------------------------------------------------------------------------------------------------------|------------|
| Describe whether exclusion criteria were pre-established. Report if sample or data points were omitted from analysis. If yes, report if this was due to attrition or intentional exclusion and provide justification. | See Methods, Method Details section, pg. 40.<br>For full details, see Supplementary Methods, Method Details section, pg. 6. |            |

| <b>Statistics</b>                                            | <b>Indicate where provided:<br/>section/figure legend</b>                                                                               | <b>N/A</b> |
|--------------------------------------------------------------|-----------------------------------------------------------------------------------------------------------------------------------------|------------|
| Describe statistical tests used and justify choice of tests. | See Methods, Quantification and Statistical Analysis section, pg. 44<br>For full details, see Supplementary Methods, Quantification and |            |

|  |                                       |  |
|--|---------------------------------------|--|
|  | Statistical Analysis section. pg. 15. |  |
|--|---------------------------------------|--|

| Data availability                                                                                                                                                | Indicate where provided: section/submission form                                                                                                                                                                                                                                                                                                                                                                                                                                                                                                                                                                                                                                                                                                                                                                                                                                                                                                                                                                                                                                                                                                                                                                                                                                                                                                                                                                                             | N/A |
|------------------------------------------------------------------------------------------------------------------------------------------------------------------|----------------------------------------------------------------------------------------------------------------------------------------------------------------------------------------------------------------------------------------------------------------------------------------------------------------------------------------------------------------------------------------------------------------------------------------------------------------------------------------------------------------------------------------------------------------------------------------------------------------------------------------------------------------------------------------------------------------------------------------------------------------------------------------------------------------------------------------------------------------------------------------------------------------------------------------------------------------------------------------------------------------------------------------------------------------------------------------------------------------------------------------------------------------------------------------------------------------------------------------------------------------------------------------------------------------------------------------------------------------------------------------------------------------------------------------------|-----|
| For newly created and reused datasets, the manuscript includes a data availability statement that provides details for access (or notes restrictions on access). | See Declarations, Availability of data and materials section, pg. 51. See Supplementary Methods, Data and Code Availability section, pg. 2.                                                                                                                                                                                                                                                                                                                                                                                                                                                                                                                                                                                                                                                                                                                                                                                                                                                                                                                                                                                                                                                                                                                                                                                                                                                                                                  |     |
| When newly created datasets are publicly available, provide accession number in repository OR DOI and licensing details where available.                         | NCBI Gene Expression Omnibus, GSE182338<br><a href="https://www.ncbi.nlm.nih.gov/geo/query/acc.cgi?acc=GSE182338">https://www.ncbi.nlm.nih.gov/geo/query/acc.cgi?acc=GSE182338</a>                                                                                                                                                                                                                                                                                                                                                                                                                                                                                                                                                                                                                                                                                                                                                                                                                                                                                                                                                                                                                                                                                                                                                                                                                                                           |     |
| If reused data is publicly available provide accession number in repository OR DOI, OR URL, OR citation.                                                         | <ul style="list-style-type: none"> <li>(1) NCBI Gene Expression Omnibus, GSE102088; <a href="https://www.ncbi.nlm.nih.gov/geo/query/acc.cgi?acc=GSE102088">https://www.ncbi.nlm.nih.gov/geo/query/acc.cgi?acc=GSE102088</a> (downloaded via GEOquery package);</li> <li>(2) NCBI Gene Expression Omnibus, GSE81540; <a href="https://www.ncbi.nlm.nih.gov/geo/query/acc.cgi?acc=GSE81540">https://www.ncbi.nlm.nih.gov/geo/query/acc.cgi?acc=GSE81540</a> (downloaded via GEOquery package);</li> <li>(3) GDC Portal, TCGA BRCA Harmonized RNA-Seq FPKM data; <a href="https://portal.gdc.cancer.gov/">https://portal.gdc.cancer.gov/</a> (downloaded via TCGAAbiolinks package);</li> <li>(4) GTEx Portal, GTEx Breast RNA-Seq count data; <a href="https://gtexportal.org/home/">https://gtexportal.org/home/</a> (downloaded via recount3 package)</li> <li>(5) NCBI Gene Expression Omnibus, GSE161529; <a href="https://www.ncbi.nlm.nih.gov/geo/query/acc.cgi?acc=GSE161529">https://www.ncbi.nlm.nih.gov/geo/query/acc.cgi?acc=GSE161529</a> (provided as a Seurat object by the group of Dr. Andrea Bild, City of Hope)</li> <li>(6) NCBI Gene Expression Omnibus, GSE174588; <a href="https://www.ncbi.nlm.nih.gov/geo/query/acc.cgi?acc=GSE174588">https://www.ncbi.nlm.nih.gov/geo/query/acc.cgi?acc=GSE174588</a> (provided as a Seurat object by Dr.Kai Kessenbrock, City of Hope)</li> <li>(7) NCBI Gene Expression</li> </ul> |     |

|  |                                                                                                                                                                                                                 |  |
|--|-----------------------------------------------------------------------------------------------------------------------------------------------------------------------------------------------------------------|--|
|  | Omnibus, GSE198732;<br><a href="https://www.ncbi.nlm.nih.gov/geo/query/acc.cgi?acc=GSE198732">https://www.ncbi.nlm.nih.gov/geo/query/acc.cgi?acc=GSE198732</a><br>(downloaded from NCBI GEO as a Seurat object) |  |
|--|-----------------------------------------------------------------------------------------------------------------------------------------------------------------------------------------------------------------|--|

| Code availability                                                                                                                                                                                                                                                  | Indicate where provided: section/figure legend                                                                                                          | N/A |
|--------------------------------------------------------------------------------------------------------------------------------------------------------------------------------------------------------------------------------------------------------------------|---------------------------------------------------------------------------------------------------------------------------------------------------------|-----|
| For any computer code/software/mathematical algorithms essential for replicating the main findings of the study, whether newly generated or re-used, the manuscript includes a data availability statement that provides details for access or notes restrictions. | See Declarations, Availability of data and materials section, pg. 51. See Supplementary Methods, Data and Code Availability section, pg. 2.             |     |
| Where newly generated code is publicly available, provide accession number in repository, OR DOI OR URL and licensing details where available. State any restrictions on code availability or accessibility.                                                       |                                                                                                                                                         | N/A |
| If reused code is publicly available provide accession number in repository OR DOI OR URL, OR citation.                                                                                                                                                            | All R/Bioconductor packages and citation information are listed. See Methods pg. 38. Package versions are additionally listed in Supplementary Methods. |     |

## Reporting:

The MDAR framework recommends adoption of discipline-specific guidelines, established and endorsed through community initiatives.

| Adherence to community standards                                                                                                                                                | Indicate where provided: section/figure legend | N/A |
|---------------------------------------------------------------------------------------------------------------------------------------------------------------------------------|------------------------------------------------|-----|
| State if relevant guidelines (e.g., ICMJE, MIBBI, ARRIVE, STRANGE) have been followed, and whether a checklist (e.g., CONSORT, PRISMA, ARRIVE) is provided with the manuscript. |                                                | N/A |

\* We provide the following guidance regarding transparent reporting and statistics; we also refer authors to [Ten common statistical mistakes to watch out for when writing or reviewing a manuscript](#).

### Sample-size estimation

See Methods, Materials Design Analysis section: Sample-size estimation, pg. 39.

For full details, see Supplementary Methods, Materials Design Analysis section: Sample-size estimation, pg. 5.

### Replicates

See Methods, Materials Design Analysis section: Replicates, pg. 39.

For full details, see Supplementary Methods, Materials Design Analysis section: Replicates, pg. 4.

**Statistical reporting**

See Methods, Materials Design Analysis section: Statistical reporting, pg. 40 and Quantification and Statistical Analysis section, pg. 44.

For full details, see Supplementary Methods, Materials Design Analysis section: Statistical reporting, pg. 6 and Quantification and Statistical Analysis section. pg. 15.

**Group allocation**

See Methods, Materials Design Analysis section: Group allocation, pg. 38.

For full details, see Supplementary Methods, Materials Design Analysis section: Group allocation, pg. 4.
