# Supplementary material for: Luminal epithelial cells integrate variable responses to aging into stereotypical changes that underlie breast cancer susceptibility
Source: eLife journal article supplement (doi:10.7554/elife.95720), 2024-11-15
Supplement: supp [file elife_poa_e95720_Figure_1_source_data_2.xlsx]

## Sheet: Sheet1
	Number of genes DE in MEP vs LEP in <=30y				Number of genes DE in MEP vs LEP >=55y
	#DE	>= 2-fold	>= 4-fold	>= 8-fold	#DE	>= 2-fold	>= 4-fold	>= 8-fold
adj p-val <0.05	11265	4255	2025	1089	9620	3857	1827	941
adj p-val <0.01	10096	4216	2025	1089	8028	3645	1824	941
adj p-val <0.001	8860	4040	2024	1089	6577	3345	1812	940
